# Supplementary material for: Reactivities of tertiary phosphines towards allenic, acetylenic, and vinylic Michael acceptors
Source: Royal Society of Chemistry journal article supplement (doi:10.1039/d4sc04852k), 2024-01-01
Supplement: d4sc04852k1.pdf [file d4sc04852k1.pdf]

*Electronic Supplementary Information*

**Reactivities of tertiary phosphines towards allenic, acetylenic, and vinylic  
Michael acceptors**

Feng An,<sup>+a</sup> Jan Brosette,<sup>+a</sup> Harish Jangra,<sup>a</sup> Yin Wei,<sup>b</sup> Min Shi,<sup>bc</sup> Hendrik Zipse\*<sup>a</sup> and  
Armin R. Ofial\*<sup>a</sup>

<sup>+</sup> These authors contributed equally to this work.

<sup>a</sup> *Department Chemie, Ludwig-Maximilians-Universität München, Butenandtstr. 5–13,  
81377 München (Germany)*

*E-Mail: zipse@cup.uni-muenchen.de (H.Z.), ofial@lmu.de (A.R.O.)*

<sup>b</sup> *State Key Laboratory of Organometallic Chemistry,  
Shanghai Institute of Organic Chemistry, Chinese Academy of  
Sciences, 354 Fenglin Road, Shanghai 200032 (P. R. China)*

<sup>c</sup> *Key Laboratory for Advanced Materials and Institute of Fine  
Chemicals, East China University of Science and Technology,  
130 MeiLong Road, Shanghai 200237 (P. R. China)*

## Table of Contents

|        |                                                                                                                           |     |
|--------|---------------------------------------------------------------------------------------------------------------------------|-----|
| 1      | Additional Figures and Tables.....                                                                                        | S4  |
| 2      | Synthesis and Analytics.....                                                                                              | S6  |
| 2.1    | General.....                                                                                                              | S6  |
| 2.2    | Syntheses and Purifications of Educts .....                                                                               | S7  |
| 2.3    | Copies of NMR Spectra for Educts .....                                                                                    | S14 |
| 2.3.1  | Ethyl acrylate ( <b>1</b> ) .....                                                                                         | S14 |
| 2.3.2  | Ethyl 2,3-butadienoate ( <b>2</b> ) .....                                                                                 | S15 |
| 2.3.3  | Ethyl propiolate ( <b>3</b> ) .....                                                                                       | S16 |
| 2.3.4  | Ethenesulfonylfluoride (ESF, <b>4</b> ).....                                                                              | S17 |
| 2.3.5  | Ethyl 2-butynoate ( <b>5</b> ) .....                                                                                      | S18 |
| 2.3.6  | Tris(4-fluorophenyl)phosphine P(pfp) <sub>3</sub> .....                                                                   | S19 |
| 2.3.7  | Triphenylphosphine PPh <sub>3</sub> .....                                                                                 | S21 |
| 2.3.8  | Triphenylphosphonium triflate (TPPT).....                                                                                 | S22 |
| 2.3.9  | Tris(4-methoxyphenyl)phosphine P(ani) <sub>3</sub> .....                                                                  | S24 |
| 2.3.10 | Methyldiphenylphosphine PMePh <sub>2</sub> .....                                                                          | S25 |
| 2.3.11 | Methyldiphenylphosphonium triflate.....                                                                                   | S27 |
| 2.3.12 | Dimethyl(phenyl)phosphine .....                                                                                           | S29 |
| 2.3.13 | Dimethyl(phenyl)phosphonium triflate .....                                                                                | S31 |
| 2.3.14 | Tributylphosphine .....                                                                                                   | S33 |
| 2.3.15 | Tributylphosphonium triflate (TBPT) .....                                                                                 | S34 |
| 2.3.16 | Trimethylphosphonium tetrafluoroborate .....                                                                              | S36 |
| 2.3.17 | Tricyclohexylphosphonium triflate .....                                                                                   | S37 |
| 2.3.18 | Trioctylphosphonium triflate .....                                                                                        | S39 |
| 2.3.19 | Tri(naphthalen-1-yl)phosphane .....                                                                                       | S41 |
| 2.3.20 | Triphenylphosphine oxide .....                                                                                            | S42 |
| 2.3.21 | Triethylamine .....                                                                                                       | S44 |
| 2.3.22 | Triethylammonium triflate (TEAT) .....                                                                                    | S45 |
| 2.3.23 | 2,4,6-Collidinium triflate (CT).....                                                                                      | S46 |
| 2.4    | Product Studies.....                                                                                                      | S47 |
| 2.4.1  | Reaction of triphenylphosphonium triflate (TPPT) with ethyl acrylate ( <b>1</b> ).....                                    | S47 |
| 2.4.2  | Reaction of triphenylphosphonium triflate (TPPT) with ethyl buta-2,3-dienoate ( <b>2</b> ) .....                          | S49 |
| 2.4.3  | Reaction of triphenylphosphonium triflate (TPPT) with ethyl propiolate ( <b>3</b> ).....                                  | S53 |
| 2.4.4  | Reaction of triphenylphosphonium triflate with ethenesulfonyl fluoride ( <b>4</b> ) .....                                 | S56 |
| 3      | Studies on the Interactions Between Electrophiles, Nucleophiles and Proton Sources in CD <sub>2</sub> Cl <sub>2</sub> ... | S60 |
| 3.1    | Brønsted Basicity of PMe <sub>2</sub> Ph and PMePh <sub>2</sub> vs 2,4,6-Collidine .....                                  | S60 |
| 3.1.1  | PMePh <sub>2</sub> and 2,4,6-collidinium triflate (CT) .....                                                              | S60 |
| 3.1.2  | PMe <sub>2</sub> Ph and 2,4,6-collidinium triflate (CT) .....                                                             | S62 |
| 3.2    | Interactions of Proton Sources with Electrophiles .....                                                                   | S64 |
| 3.2.1  | Ethyl acrylate ( <b>1</b> ) with 2,4,6-collidinium triflate (CT).....                                                     | S64 |
| 3.2.2  | Ethyl allenolate ( <b>2</b> ) with CT .....                                                                               | S65 |
| 3.2.3  | Ethyl propiolate ( <b>3</b> ) with CT .....                                                                               | S66 |
| 3.2.5  | Ethyl acrylate ( <b>1</b> ) with tributylphosphonium triflate (TBPT).....                                                 | S67 |
| 3.3    | Stability of the Electrophiles <b>2</b> and <b>5</b> in the Presence of Triethylamine.....                                | S68 |
| 3.3.1  | Ethyl 2,3-butadienoate ( <b>2</b> ) + trimethylamine (TEA).....                                                           | S68 |
| 3.3.2  | Ethyl 2-butynoate ( <b>5</b> ) + trimethylamine (TEA).....                                                                | S69 |
| 3.4    | NMR Studies of Mixtures of TEAT with the Electrophiles <b>1–3</b> .....                                                   | S70 |
| 3.4.1  | Ethyl acrylate ( <b>1</b> ) with triethylammonium triflate (TEAT) .....                                                   | S70 |

|        |                                                                                                         |      |
|--------|---------------------------------------------------------------------------------------------------------|------|
| 3.4.2  | Ethyl 2,3-butadienoate ( <b>2</b> ) with triethylammonium triflate (TEAT) .....                         | S71  |
| 3.4.3  | Ethyl 2-butynoate ( <b>5</b> ) with triethylammonium triflate (TEAT) .....                              | S72  |
| 3.4.4  | In situ generation of trimethylphosphine $\text{PMe}_3$ in $\text{CD}_2\text{Cl}_2$ .....               | S73  |
| 3.4.5  | Generation of tricyclohexylphosphine $\text{PCy}_3$ in $\text{CD}_2\text{Cl}_2$ .....                   | S75  |
| 3.4.6  | Generation of trioctylphosphine $\text{POct}_3$ in $\text{CD}_2\text{Cl}_2$ .....                       | S76  |
| 3.5    | Deprotonation of Phosphonium Salts <b>P1</b> and <b>P2</b> .....                                        | S77  |
| 3.5.1  | Deprotonation of <b>P1</b> with $\text{KOtBu}$ in $d_6$ -DMSO .....                                     | S77  |
| 3.5.2  | Deprotonation of <b>P2</b> with $\text{KOtBu}$ in $d_6$ -DMSO .....                                     | S79  |
| 4      | UV-Vis Absorption Spectra in Dichloromethane.....                                                       | S81  |
| 4.1    | General.....                                                                                            | S81  |
| 4.2    | UV-Vis Absorption Spectra of Phosphines $\text{PR}_3$ .....                                             | S82  |
| 4.3    | UV-Vis Absorption Spectra of Triethylamine, TEAT, 2,4,6-Collidine and CT.....                           | S83  |
| 4.4    | UV-Vis Absorption Spectra of Electrophiles.....                                                         | S84  |
| 5      | Kinetic Measurements .....                                                                              | S85  |
| 5.1    | General.....                                                                                            | S85  |
| 5.2    | Kinetic Experiments in Dichloromethane .....                                                            | S86  |
| 5.2.1  | Kinetics of the reactions of ethyl acrylate ( <b>1</b> ) with $\text{PR}_3$ .....                       | S86  |
| 5.2.2  | Kinetics of the reactions of ethyl 2,3-butadienoate ( <b>2</b> ) with $\text{PR}_3$ .....               | S98  |
| 5.2.3  | Kinetics of the reactions of ethyl propiolate ( <b>3</b> ) with $\text{PR}_3$ .....                     | S108 |
| 5.2.4  | Kinetics of the reactions with ethenesulfonyl fluoride (ESF, <b>4</b> ) with $\text{PR}_3$ .....        | S119 |
| 5.2.5  | Kinetics of the reactions with ethyl 2-butynoate ( <b>5</b> ) with $\text{PR}_3$ .....                  | S125 |
| 6      | Theoretical Analysis .....                                                                              | S127 |
| 6.1    | Prelude: Quantum-Chemical Method Validation .....                                                       | S127 |
| 6.2    | Computational Methods.....                                                                              | S132 |
| 6.3    | Computational Results.....                                                                              | S133 |
| 6.3.1  | Michael acceptors.....                                                                                  | S133 |
| 6.3.2  | Phosphines.....                                                                                         | S134 |
| 6.3.3  | Protonated phosphines.....                                                                              | S136 |
| 6.3.4  | Methylated phosphines .....                                                                             | S137 |
| 6.3.5  | Zwitterions formed by the addition of $\text{PR}_3$ to ethyl acrylate ( <b>1</b> ).....                 | S138 |
| 6.3.6  | Zwitterions formed by the addition of $\text{PR}_3$ to ethyl allenoate ( <b>2</b> ) .....               | S139 |
| 6.3.7  | Zwitterions formed by the addition of $\text{PR}_3$ to ethyl propiolate ( <b>3</b> ).....               | S140 |
| 6.3.8  | Transition state (TS) properties for additions of $\text{PR}_3$ to acrylate <b>1</b> .....              | S141 |
| 6.3.9  | Transition state (TS) properties for additions of $\text{PR}_3$ to allenoate <b>2</b> .....             | S142 |
| 6.3.10 | Transition state (TS) properties for additions of $\text{PR}_3$ to propiolate <b>3</b> .....            | S143 |
| 6.3.11 | NBO analysis .....                                                                                      | S144 |
| 6.3.12 | Thermodynamics of allenoate and butynoate isomerisations .....                                          | S146 |
| 6.3.13 | Theoretical $\text{pK}_{\text{aH}}$ value prediction .....                                              | S147 |
| 6.3.14 | Activation strain analysis for reactions of $\text{PPh}_3$ with <b>1</b> , <b>2</b> , or <b>3</b> ..... | S148 |
| 6.3.15 | Intrinsic barriers.....                                                                                 | S156 |
| 6.4    | Cartesian Coordinates.....                                                                              | S157 |
| 7      | References .....                                                                                        | S213 |

## 1 Additional Figures and Tables

**Table S1.** Basicities ( $pK_{\text{aH}}$ ) of phosphines  $\text{PR}_3$  in water and in acetonitrile

| Phosphine $\text{PR}_3$  | $pK_{\text{aH}}(\text{H}_2\text{O})^a$ | $pK_{\text{aH}}(\text{MeCN})^b$ |
|--------------------------|----------------------------------------|---------------------------------|
| $\text{P}(\text{ani})_3$ | 4.57                                   | 10.06                           |
| $\text{PPh}_3$           | 2.73                                   | 7.62                            |
| $\text{PMePh}_2$         | 4.65                                   | 9.97                            |
| $\text{PMe}_2\text{Ph}$  | 6.49                                   | 12.64                           |
| $\text{PMe}_3$           | 8.65                                   | 15.48                           |

<sup>a</sup> From ref. S1. <sup>b</sup> From ref. S2.

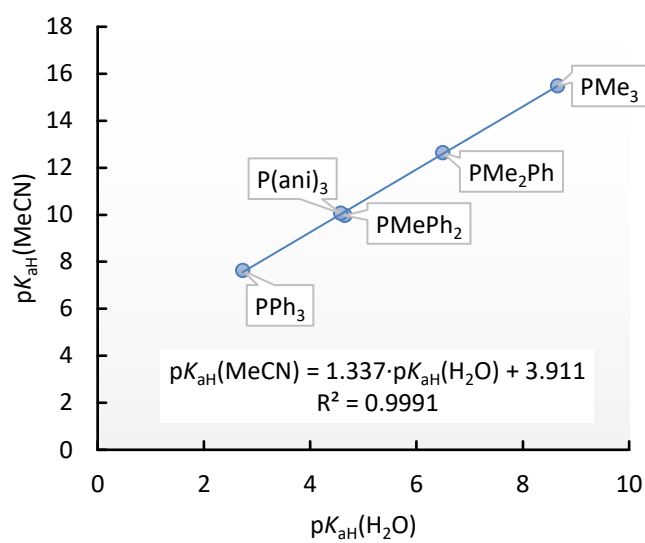

**Fig. S1.** Linear correlation of  $pK_{\text{aH}}(\text{MeCN})$  with  $pK_{\text{aH}}(\text{H}_2\text{O})$  for phosphines  $\text{PR}_3$  (with data from Table S1).

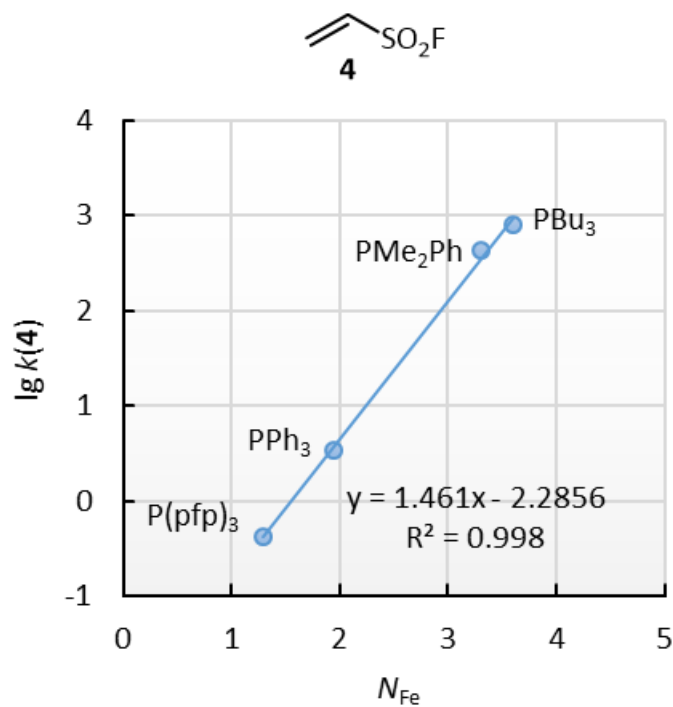

**Fig. S2.** Reactivities ( $\lg k_2$ ) of  $\text{PR}_3$  towards ESF (**4**) correlate linearly with  $N_{\text{Fe}}$ , which are nucleophilicity parameters for phosphines derived from reactions of  $\text{PR}_3$  with cationic electrophiles structurally similar to  $[\text{Fe}(\text{CO})_3(\text{C}_6\text{H}_7)]^+$ , from ref. S3. With rate constants  $\lg k_2(\mathbf{4})$  from Table 2 (main text). For the  $\text{PMe}_2\text{Ph}$  entry, the  $N_{\text{Fe}}$  of  $\text{PEt}_2\text{Ph}$  was used.

## 2 Synthesis and Analytics

### 2.1 General

**Analytics.**  $^1\text{H}$ ,  $^{13}\text{C}$ ,  $^{19}\text{F}$ , and  $^{31}\text{P}$  NMR spectra were measured on 400 MHz, 600 MHz, or 800 MHz NMR spectrometers. The phosphines samples in  $\text{CD}_2\text{Cl}_2$  were prepared in a glove box under an atmosphere of dry argon gas and measured immediately after complete mixing.  $^1\text{H}$  and  $^{13}\text{C}$  NMR spectra were calibrated to residual solvent peaks.<sup>54</sup> Chemical shifts are given in ppm and coupling constants  $J$  are reported in Hz. Multiplicities are abbreviated as follows: s = singlet, d = doublet, t = triplet, q = quartet, hept = heptet, m = multiplet, and br = broad.  $^{13}\text{C}\{^1\text{H}\}$  NMR spectra were acquired with broad band proton decoupling. Numbers of C-attached hydrogen atoms were obtained from gHSQC experiments and are reported as C, CH,  $\text{CH}_2$ , or  $\text{CH}_3$ . The assignments of individual NMR signals were based on additional 2D-NMR experiments (gHSQC, gHMBC, and COSY). HRMS spectra were determined on a Finnigan MAT 95 mass spectrometer. IR spectra were recorded on a FTIR Spectrometer SPECTRUM BX II (Perkin Elmer). Melting points were obtained on a BÜCHI M-560 melting point apparatus and are uncorrected.

**Synthesis:** Flash column chromatography was performed on Merck silica gel 60 (0.040–0.063 mm) using compressed air. Thin layer chromatography (TLC) was carried out by using Merck silica gel 60 F254 aluminum plates. Compounds on eluted plates were visualised using a 254 nm UV lamp and/or by treatment with a suitable stain followed by heating. Concentration under reduced pressure was performed on rotary evaporators with a water bath temperature of 40 °C. Starting materials and reagents were purchased from Sigma-Aldrich or ABCR and were used as supplied or, in the case of some liquids, distilled. Solvents were distilled or dried prior to use over appropriate drying agents: dichloromethane (calcium hydride) and diethyl ether (sodium/benzophenone). Solvents for filtration, chromatography, and recrystallisation were purchased from Fisher and used as received.

## 2.2 Syntheses and Purifications of Educts

**Ethyl acrylate (1)** was purified by fresh distillation (bp 99.4 °C).

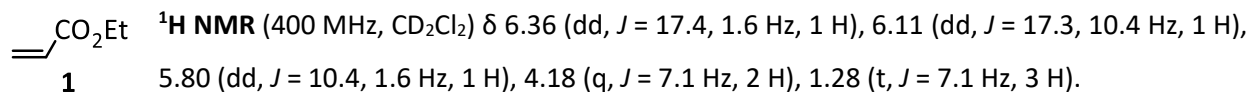

**<sup>13</sup>C{<sup>1</sup>H} NMR** (101 MHz, CD<sub>2</sub>Cl<sub>2</sub>) δ 166.4, 130.5, 129.1, 60.8, 14.4.

### Ethyl buta-2,3-dienoate (2)

Method 1: Commercially available **2** (Aldrich) was purified by column chromatography on silica gel (pentane/diethyl ether 25:1 to 15:1).

Method 2: Ethyl 2,3-butadienoate (**2**) was synthesised by a modified literature procedure reported by Hansen.<sup>55</sup> For details and further analytical data see the procedure described in ref. S6.

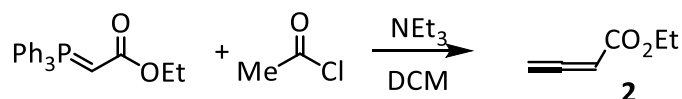

**<sup>1</sup>H NMR** (400 MHz, CD<sub>2</sub>Cl<sub>2</sub>) δ 5.62 (t, *J* = 6.6 Hz, 1 H), 5.21 (d, *J* = 6.6 Hz, 2 H), 4.16 (q, *J* = 7.1 Hz, 2 H), 1.26 (t, *J* = 7.1 Hz, 3 H). **<sup>13</sup>C{<sup>1</sup>H} NMR** (101 MHz, CD<sub>2</sub>Cl<sub>2</sub>) δ 216.0, 165.8, 88.2, 79.3, 61.3, 14.4.

**Ethyl propiolate (3)** was purchased (Aldrich) and used as received.

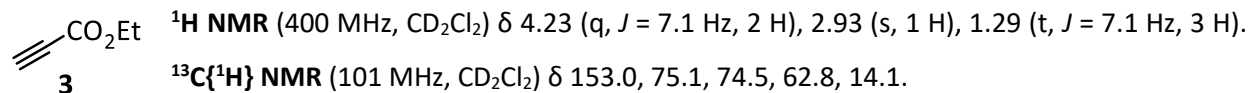

**Ethenesulfonyl fluoride (ESF, 4)** was purified freshly by distillation (bp. 115–116 °C) prior to use in kinetic or product studies.

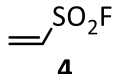 **<sup>1</sup>H NMR** (400 MHz, CD<sub>2</sub>Cl<sub>2</sub>) δ 6.75 (ddd, <sup>2</sup>*J*<sub>H,H</sub> = 16.6 Hz, <sup>3</sup>*J*<sub>H,H</sub> = 9.4 Hz, <sup>4</sup>*J*<sub>H,F</sub> = 2.1 Hz, 1 H), 6.66 (ddd, <sup>2</sup>*J*<sub>H,H</sub> = 16.6 Hz, <sup>4</sup>*J*<sub>H,F</sub> = 1.1 Hz, <sup>3</sup>*J*<sub>H,H</sub> = 0.6 Hz, 1 H), 6.41 (ddd, <sup>3</sup>*J*<sub>H,H</sub> = 9.4 Hz, <sup>3</sup>*J*<sub>H,F</sub> = 5.3 Hz, <sup>3</sup>*J*<sub>H,H</sub> = 0.6 Hz, 1 H). **<sup>13</sup>C{<sup>1</sup>H} NMR** (101 MHz, CD<sub>2</sub>Cl<sub>2</sub>) δ 135.4 (d, *J*<sub>C,F</sub> = 2.8 Hz), 130.3 (d, *J*<sub>C,F</sub> = 27.9 Hz). **<sup>19</sup>F NMR** (377 MHz, CD<sub>2</sub>Cl<sub>2</sub>) δ 57.3 (ddd, *J*<sub>F,H</sub> = 5.3, 2.0, 1.0 Hz).

**Ethyl 2-butynoate (5)** was purchased (Aldrich) and used as received.

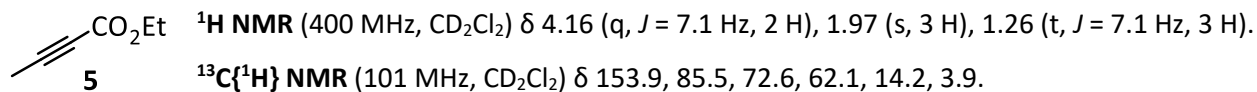

**Tris(4-fluorophenyl)phosphine P(pfp)<sub>3</sub>** was purchased (Aldrich) and used as received.

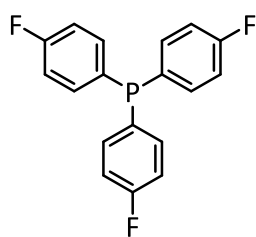

<sup>1</sup>H NMR (400 MHz, CD<sub>2</sub>Cl<sub>2</sub>) δ 7.30–7.25 (m, 6 H), 7.10–7.05 (m, 6 H). <sup>13</sup>C{<sup>1</sup>H} NMR (101 MHz, CD<sub>2</sub>Cl<sub>2</sub>) δ 163.9 (d, J<sub>C,F</sub> = 248.7 Hz), 136.0 (dd, J = 21.4, 8.1 Hz), 133.1 (dd, J = 11.3, 3.5 Hz), 116.2 (dd, J = 21.1, 7.6 Hz). <sup>31</sup>P NMR (162 MHz, CD<sub>2</sub>Cl<sub>2</sub>) δ -9.2 (q, J = 4.5 Hz). <sup>19</sup>F NMR (377 MHz, CD<sub>2</sub>Cl<sub>2</sub>) δ -112.9 to -113.0 (m).

**Triphenylphosphine PPh<sub>3</sub>**

PPh<sub>3</sub> was purified by a quick distillation (3 × 10<sup>-3</sup> mbar, 140–165 °C, distillate condensed under liquid nitrogen cooling bath).<sup>56</sup>

<sup>1</sup>H NMR (400 MHz, CD<sub>2</sub>Cl<sub>2</sub>) δ 7.39–7.32 (m, 15 H). <sup>13</sup>C{<sup>1</sup>H} NMR (101 MHz, CD<sub>2</sub>Cl<sub>2</sub>) δ 137.8 (d, J<sub>C,P</sub> = 11.4 Hz), 134.1 (d, J<sub>C,P</sub> = 19.6 Hz), 129.1, 128.9 (d, J<sub>C,P</sub> = 6.9 Hz). <sup>31</sup>P NMR (162 MHz, CD<sub>2</sub>Cl<sub>2</sub>) δ -5.5.

**Triphenylphosphonium Triflate (TPPT)** was prepared as previously reported.<sup>56</sup>

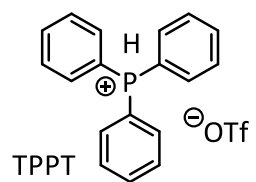

TPPT

<sup>1</sup>H NMR (400 MHz, CD<sub>2</sub>Cl<sub>2</sub>) δ 9.47 (d, <sup>1</sup>J<sub>H,P</sub> = 533.2 Hz, 1 H), 7.88–7.65 (m, 15 H). <sup>13</sup>C{<sup>1</sup>H} NMR (101 MHz, CD<sub>2</sub>Cl<sub>2</sub>) δ 135.9 (d, J<sub>C,P</sub> = 3.0 Hz), 134.5 (d, J<sub>C,P</sub> = 11.4 Hz), 130.9 (d, J<sub>C,P</sub> = 13.5 Hz), 121.2 (q, J<sub>C,F</sub> = 320.7 Hz), 116.0 (d, J<sub>C,P</sub> = 87.1 Hz). <sup>31</sup>P NMR (162 MHz, CD<sub>2</sub>Cl<sub>2</sub>) δ 2.9 (d, <sup>1</sup>J<sub>P,H</sub> = 533.4 Hz). <sup>19</sup>F NMR (377 MHz, CD<sub>2</sub>Cl<sub>2</sub>) δ

-79.0.

**Tris(4-methoxyphenyl)phosphine P(ani)<sub>3</sub>** was purchased (ABCR) and used as received.

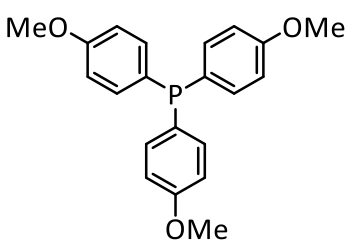

<sup>1</sup>H NMR (400 MHz, CD<sub>3</sub>CN) δ 7.22–7.17 (m, 6 H), 6.94–6.90 (m, 6 H), 3.78 (s, 9 H). <sup>13</sup>C{<sup>1</sup>H} NMR (101 MHz, CD<sub>3</sub>CN) δ 161.3, 135.8 (d, J<sub>C,P</sub> = 21.1 Hz), 129.9 (d, J<sub>C,P</sub> = 8.6 Hz), 115.2 (d, J<sub>C,P</sub> = 7.6 Hz), 55.9. <sup>31</sup>P NMR (162 MHz, CD<sub>3</sub>CN) δ -10.7 to -10.8 (m).

**Methyldiphenylphosphine PMePh<sub>2</sub>** was purchased (Aldrich) and used as received.

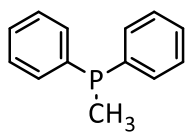

<sup>1</sup>H NMR (400 MHz, CD<sub>2</sub>Cl<sub>2</sub>) δ 7.43–7.29 (m, 10 H), 1.62 (d, J<sub>H,P</sub> = 3.7 Hz, 3 H). <sup>13</sup>C{<sup>1</sup>H} NMR (101 MHz, CD<sub>2</sub>Cl<sub>2</sub>) δ 140.8 (d, J<sub>C,P</sub> = 12.7 Hz), 132.4 (d, J<sub>C,P</sub> = 18.5 Hz), 128.7 (d, J<sub>C,P</sub> = 6.4 Hz), 128.7, 12.5 (d, J<sub>C,P</sub> = 13.8 Hz). <sup>31</sup>P{<sup>1</sup>H} NMR (162 MHz, CD<sub>2</sub>Cl<sub>2</sub>) δ -27.1.



### Methyldiphenylphosphonium triflate

Under an atmosphere of dry nitrogen triflic acid (323 mg, 2.15 mmol) was dissolved in anhydrous diethyl ether (20 mL) and cooled with an ice bath. Then P<sub>Me</sub>Ph<sub>2</sub> (429 mg, 2.14 mmol) was added dropwise. A suspension formed, which was filtered. The collected solids were washed with anhydrous diethyl ether under inert gas atmosphere. Volatiles were removed under vacuum to provide a colourless solid (587 mg, 78%).

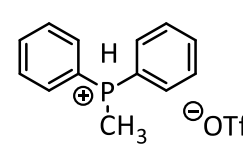 **<sup>1</sup>H NMR** (400 MHz, CD<sub>2</sub>Cl<sub>2</sub>) δ 9.05–9.03 (m, 0.5 H), 7.85–7.48 (m, 10.5 H), 2.54 (dd, *J* = 15.1, 4.1 Hz, 3 H). **<sup>13</sup>C{<sup>1</sup>H} NMR** (101 MHz, CD<sub>2</sub>Cl<sub>2</sub>) δ 135.8 (d, *J*<sub>C,P</sub> = 3.1 Hz), 133.4 (d, *J*<sub>C,P</sub> = 11.2 Hz), 130.8 (d, *J*<sub>C,P</sub> = 13.4 Hz), 121.1 (q, *J*<sub>C,F</sub> = 320.3 Hz), 116.8 (d, *J*<sub>C,P</sub> = 87.2 Hz), 6.6 (d, *J*<sub>C,P</sub> = 54.5 Hz). **<sup>31</sup>P NMR** (162 MHz, CD<sub>2</sub>Cl<sub>2</sub>) δ 1.6 (d, *J* = 527.6 Hz). **<sup>19</sup>F NMR** (377 MHz, CD<sub>2</sub>Cl<sub>2</sub>) δ -79.0.

**Dimethyl(phenyl)phosphine P<sub>Me</sub><sub>2</sub>Ph** was purchased (ABCR) and used as received.

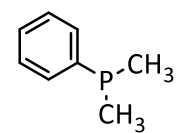 **<sup>1</sup>H NMR** (400 MHz, CD<sub>2</sub>Cl<sub>2</sub>) δ 7.48–7.44 (m, 2 H), 7.37–7.33 (m, 2 H), 7.31–7.26 (m, 1 H), 1.30 (d, *J*<sub>H,P</sub> = 2.8, 6 H). **<sup>13</sup>C{<sup>1</sup>H} NMR** (101 MHz, CD<sub>2</sub>Cl<sub>2</sub>) δ 143.4 (d, *J*<sub>C,P</sub> = 13.8 Hz), 130.9 (d, *J*<sub>C,P</sub> = 17.3 Hz), 128.7 (d, *J*<sub>C,P</sub> = 5.9 Hz), 128.3, 14.7 (d, *J*<sub>C,P</sub> = 13.1 Hz). **<sup>31</sup>P NMR** (162 MHz, CD<sub>2</sub>Cl<sub>2</sub>) δ -45.6.

### Dimethyl(phenyl)phosphonium triflate

Under an atmosphere of dry nitrogen triflic acid (763 mg, 5.08 mmol) was dissolved in anhydrous diethyl ether (15 mL) and cooled with an ice bath. Then P<sub>Me</sub><sub>2</sub>Ph (695 mg, 5.03 mmol) was added dropwise. A suspension formed, which was filtered. The collected solids were washed with anhydrous diethyl ether under inert gas atmosphere. Volatiles were removed under vacuum to provide a colourless solid (1.34 g, 92%).

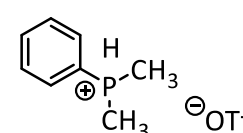 **<sup>1</sup>H NMR** (400 MHz, CD<sub>2</sub>Cl<sub>2</sub>) δ 7.86–7.78 (m, 3 H), 7.71–7.66 (m, 2 H), 7.41 (dhept, <sup>1</sup>*J*<sub>H,P</sub> = 520 Hz, *J*<sub>H,H</sub> = 5.7 Hz, 1 H), 2.26 (dd, *J*<sub>H,P</sub> = 15.4, *J*<sub>H,H</sub> = 5.7 Hz, 6 H). **<sup>13</sup>C{<sup>1</sup>H} NMR** (101 MHz, CD<sub>2</sub>Cl<sub>2</sub>) δ 135.6 (d, *J*<sub>C,P</sub> = 3.2 Hz), 132.2 (d, *J*<sub>C,P</sub> = 11.0 Hz), 130.8 (d, *J*<sub>C,P</sub> = 13.1 Hz), 121.2 (q, *J*<sub>C,F</sub> = 320.3 Hz), 117.6 (d, *J*<sub>C,P</sub> = 86.7 Hz), 6.7 (d, *J*<sub>C,P</sub> = 54.6 Hz). **<sup>31</sup>P NMR** (162 MHz, CD<sub>2</sub>Cl<sub>2</sub>) δ 0.0 (dhept, <sup>1</sup>*J*<sub>P,H</sub> = 520 Hz, <sup>2</sup>*J*<sub>P,H</sub> = 15.4 Hz). **<sup>19</sup>F NMR** (377 MHz, CD<sub>2</sub>Cl<sub>2</sub>) δ -79.0.

**Tributylphosphine P Bu<sub>3</sub>** was purified by vacuum distillation (83.5 °C, 0.75 mbar).<sup>56</sup>

<sup>1</sup>H NMR (400 MHz, CD<sub>2</sub>Cl<sub>2</sub>) δ 1.41–1.33 (m, 18 H), 0.93–0.87 (m, 9 H). <sup>13</sup>C{<sup>1</sup>H} NMR (101 MHz, CD<sub>2</sub>Cl<sub>2</sub>) δ 28.6 (d, *J*<sub>C,P</sub> = 12.8 Hz), 27.4 (d, *J*<sub>C,P</sub> = 12.6 Hz), 25.0 (d, *J*<sub>C,P</sub> = 10.9 Hz), 14.1. <sup>31</sup>P NMR (162 MHz, CD<sub>2</sub>Cl<sub>2</sub>) δ -31.3.

**Tributylphosphonium triflate (TBPT)** was prepared as reported previously.<sup>56</sup>

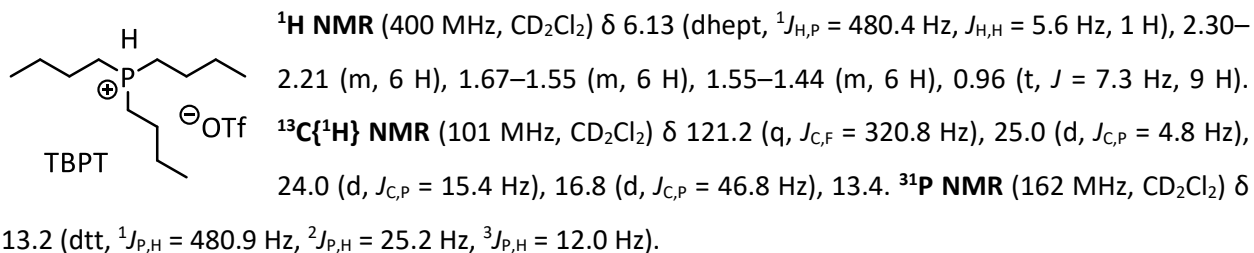

**Trimethylphosphonium tetrafluoroborate** was purchased (Aldrich) and used as received. [HPMe<sub>3</sub>]<sup>+</sup> [BF<sub>4</sub>]<sup>-</sup> is poorly soluble in dichloromethane at room temperature.

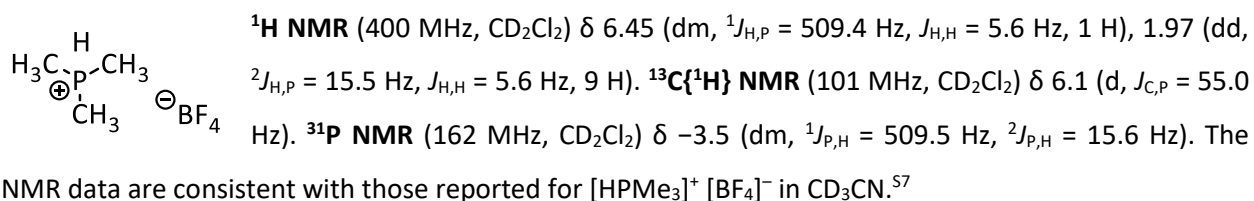

### Tricyclohexylphosphonium triflate

Under an atmosphere of dry nitrogen triflic acid (466 mg, 3.11 mmol) was dissolved in anhydrous diethyl ether (3 mL) and cooled with an ice bath. Then, a solution of tricyclohexylphosphine (845 mg, 3.01 mmol) in anhydrous diethyl ether (15 mL) was added dropwise. A suspension formed, which was filtered. The collected solids were washed with anhydrous diethyl ether under inert gas atmosphere. Volatiles were removed under vacuum to provide a colourless solid (1.28 g, 99%).

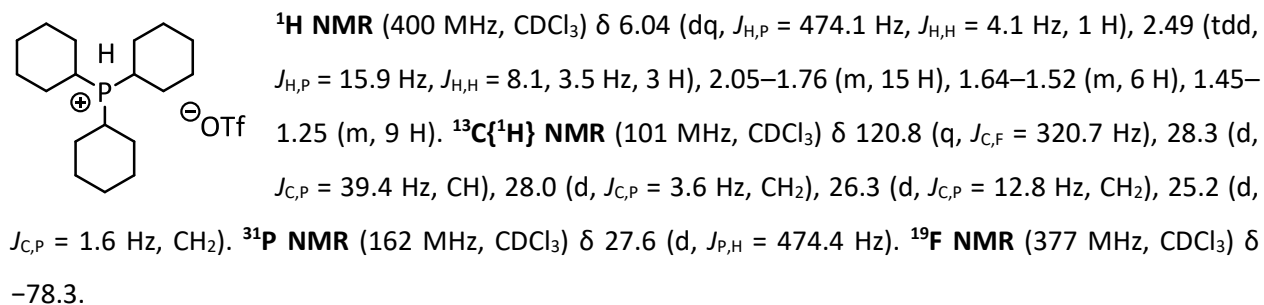



### Trioctylphosphonium triflate

Under an atmosphere of dry nitrogen triflic acid (556 mg, 3.70 mmol) was dissolved in anhydrous diethyl ether (10 mL) and cooled with an ice bath. Then, trioctylphosphine (1.31 g, 3.53 mmol) was added dropwise. The volatiles were removed under vacuum. The residue was mixed with anhydrous pentane (10 mL) under inert gas protection and kept at  $-10\text{ }^{\circ}\text{C}$ . A suspension formed, which was filtered. The collected solids were quickly washed (cold anhydrous pentane) under inert gas atmosphere. Volatiles were removed under vacuum to provide a colourless solid (521 mg, 28%).

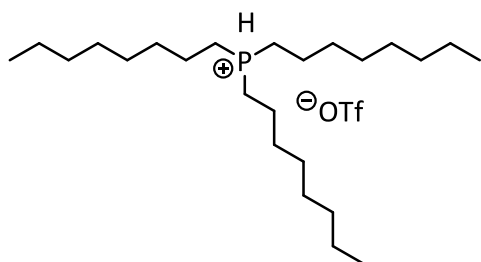

$^1\text{H NMR}$  (400 MHz,  $\text{CDCl}_3$ )  $\delta$  6.19 (dm,  $J_{\text{H,P}} = 484\text{ Hz}$ , 1 H), 2.30–2.21 (m, 6 H), 1.65–1.57 (m, 6 H), 1.48–1.40 (m, 6 H), 1.32–1.24 (m, 24 H), 0.86 (t,  $J_{\text{H,H}} = 6.7\text{ Hz}$ , 9 H).  $^{13}\text{C}\{^1\text{H}\}$  NMR (101 MHz,  $\text{CDCl}_3$ )  $\delta$  120.8(q,  $J_{\text{C,F}} = 320\text{ Hz}$ ), 31.8, 30.6 (d,  $J_{\text{C,P}} = 14.7\text{ Hz}$ ), 29.0, 28.9, 23.0 (d,  $J_{\text{C,P}} = 4.8\text{ Hz}$ ), 22.7, 16.9 (d,  $J_{\text{C,P}} = 46.5\text{ Hz}$ ), 14.1.  $^{31}\text{P NMR}$  (162 MHz,  $\text{CDCl}_3$ )  $\delta$  13.0 (dt,  $J_{\text{P,H}} =$

485.1, 25.6, 12.2 Hz).

Tri(naphthalen-1-yl)phosphane **P(1-Np)<sub>3</sub>** was purchased (Aldrich) and used as received.

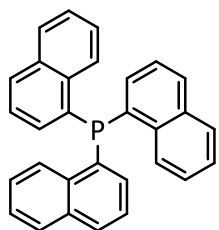

$^1\text{H NMR}$  (400 MHz,  $\text{CD}_2\text{Cl}_2$ )  $\delta$  8.54 (ddd,  $J = 8.4, 4.6, 1.1\text{ Hz}$ , 3 H), 7.93 (dd,  $J = 8.0, 1.2\text{ Hz}$ , 3 H), 7.88 (d,  $J = 8.3\text{ Hz}$ , 3 H), 7.55–7.50 (m, 3 H), 7.49–7.39 (m, 3 H), 7.27 (ddd,  $J = 8.0, 7.1, 0.7\text{ Hz}$ , 3 H), 6.96 (ddd,  $J = 7.0, 4.8, 1.3\text{ Hz}$ , 3 H).  $^{13}\text{C}\{^1\text{H}\}$  NMR (101 MHz,  $\text{CD}_2\text{Cl}_2$ )  $\delta$  136.1 (d,  $J_{\text{C,P}} = 23.8\text{ Hz}$ ), 134.1 (d,  $J_{\text{C,P}} = 4.8\text{ Hz}$ ), 133.8, 133.2 (d,  $J_{\text{C,P}} = 11.0\text{ Hz}$ ), 130.1, 129.1 (d,  $J_{\text{C,P}} = 2.0\text{ Hz}$ ), 126.7, 126.6 (d,  $J_{\text{C,P}} = 24.8\text{ Hz}$ ), 126.5 (d,  $J_{\text{C,P}} = 1.5$

Hz), 126.2 (d,  $J_{\text{C,P}} = 1.5\text{ Hz}$ ).  $^{31}\text{P}\{^1\text{H}\}$  NMR (162 MHz,  $\text{CD}_2\text{Cl}_2$ )  $\delta$  -34.1.

Triphenylphosphine Oxide (**Ph<sub>3</sub>P=O**) was purchased (Aldrich) and used as received.

$^1\text{H NMR}$  (400 MHz,  $\text{CD}_2\text{Cl}_2$ )  $\delta$  7.68–7.62 (m, 6 H), 7.59–7.54 (m, 3 H), 7.50–7.45 (m, 6 H).

$^{13}\text{C}\{^1\text{H}\}$  NMR (101 MHz,  $\text{CD}_2\text{Cl}_2$ )  $\delta$  133.4 (d,  $J = 103.4\text{ Hz}$ ), 132.3 (d,  $J = 9.8\text{ Hz}$ ), 132.2 (d,  $J = 2.8\text{ Hz}$ ), 128.9 (d,  $J = 12.0\text{ Hz}$ ).  $^{31}\text{P NMR}$  (162 MHz,  $\text{CD}_2\text{Cl}_2$ )  $\delta$  27.2.

**Triethylamine** was purified by fresh distillation over lithium aluminium hydride.

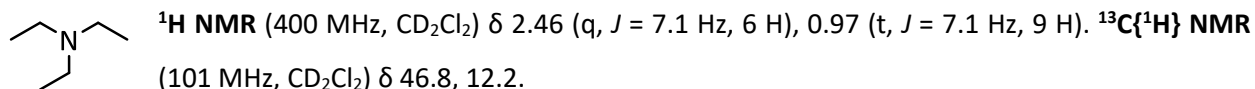

### Triethylammonium Triflate (TEAT)

Under an atmosphere of dry nitrogen triflic acid (820 mg, 5.46 mmol) was dissolved in anhydrous diethyl ether (10 mL) and cooled with an ice bath. Then, trimethylamine (580 mg, 5.73 mmol) was added dropwise. The volatiles were removed under vacuum to provide TEAT, which was kept in the fridge. In the cool, it slowly crystallised to a white solid (1.37 g, 99%).

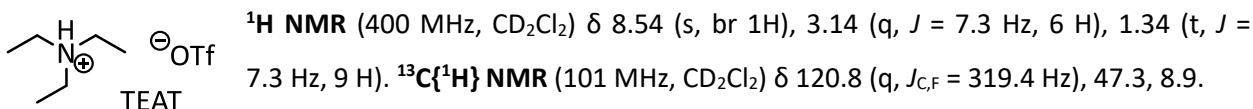

**2,4,6-Collidinium Triflate (CT)** was prepared as reported previously.<sup>56</sup>

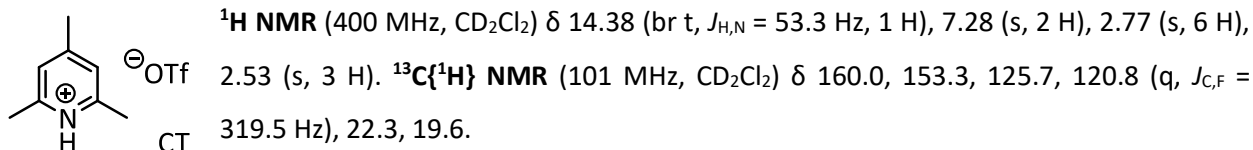

## 2.3 Copies of NMR Spectra for Educts

### 2.3.1 Ethyl acrylate (1)

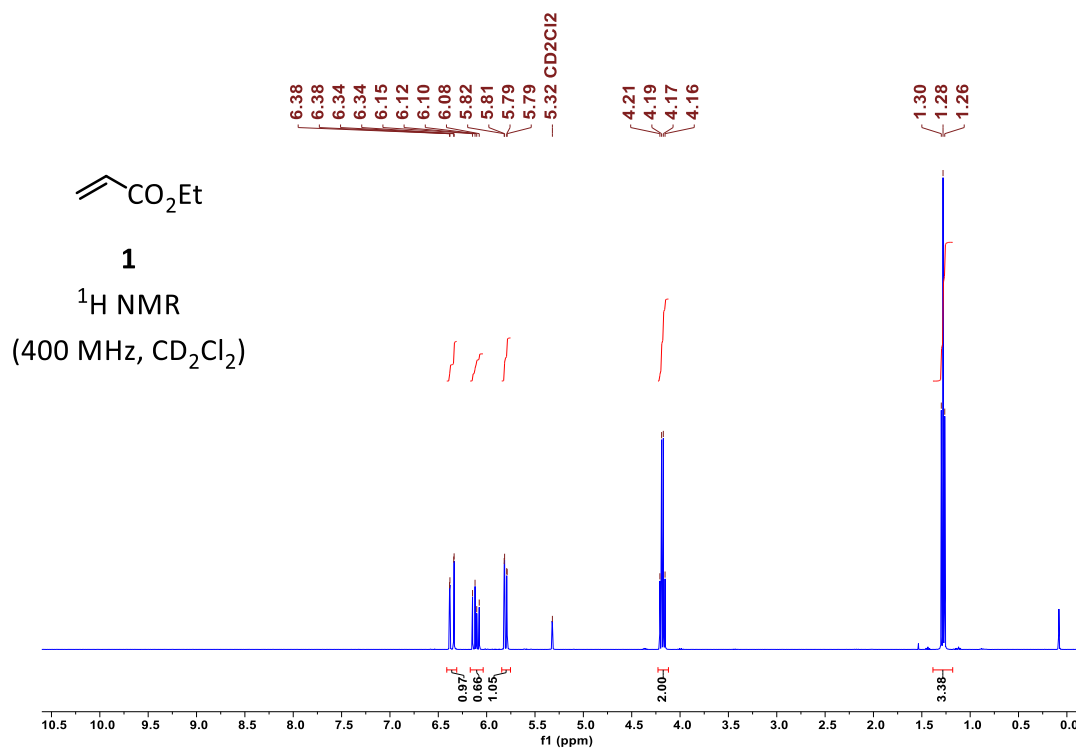

f379

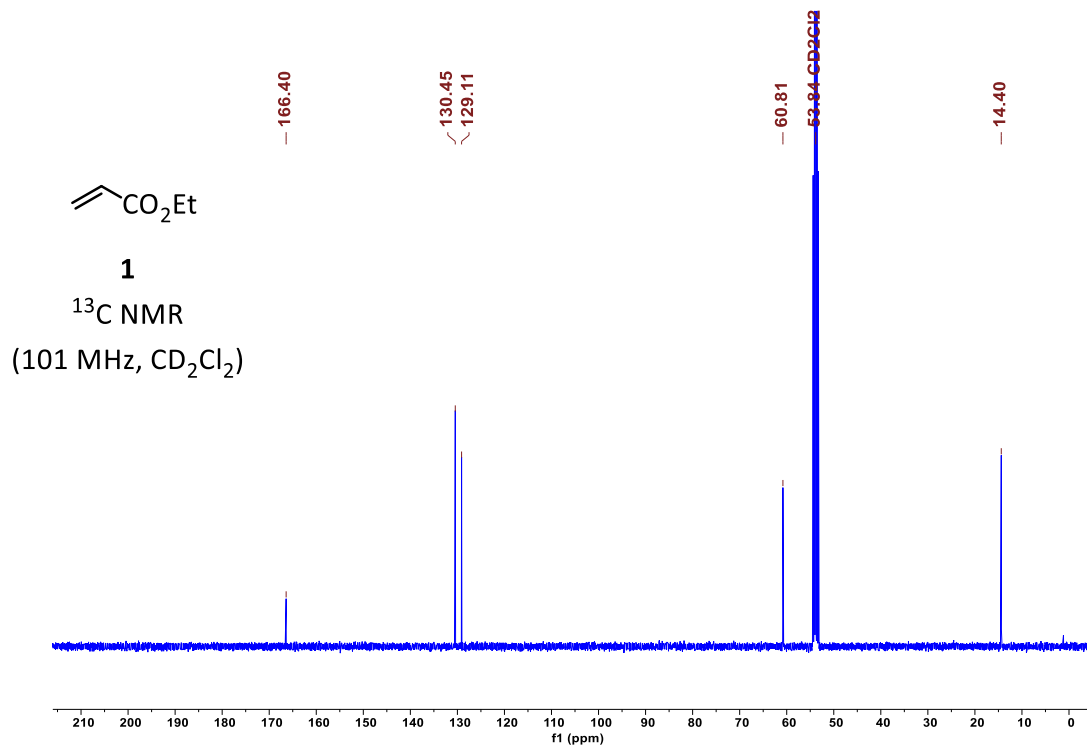

### 2.3.2 Ethyl 2,3-butadienoate (2)

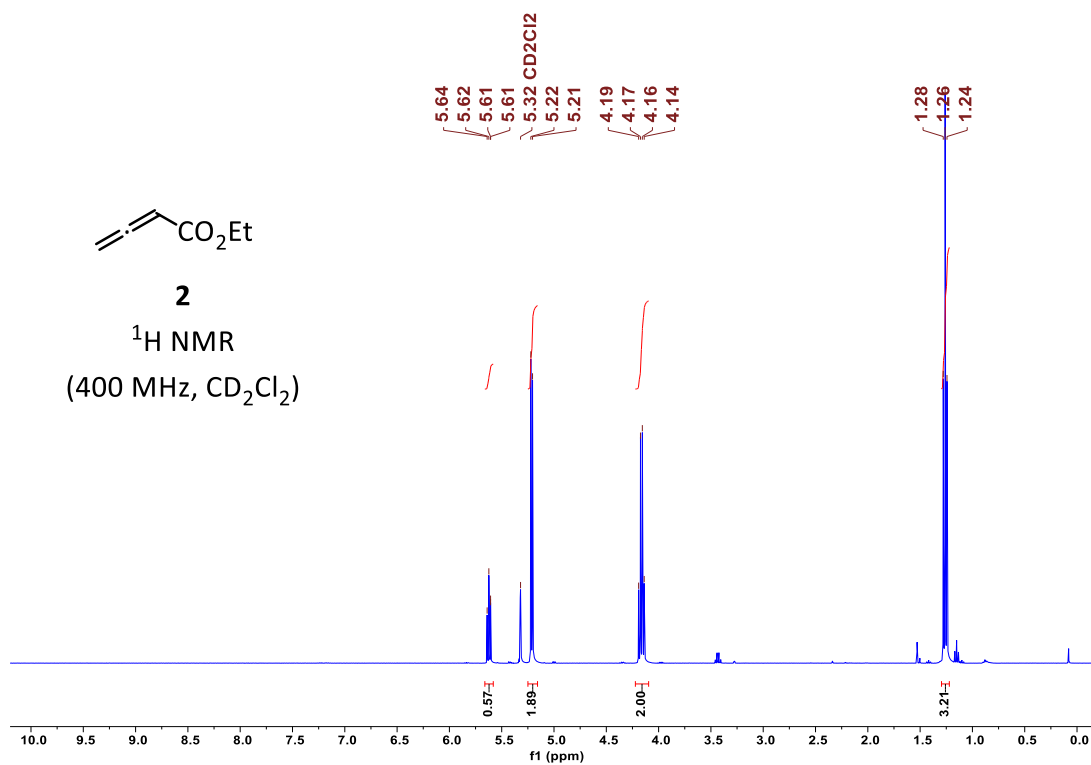

f450-02

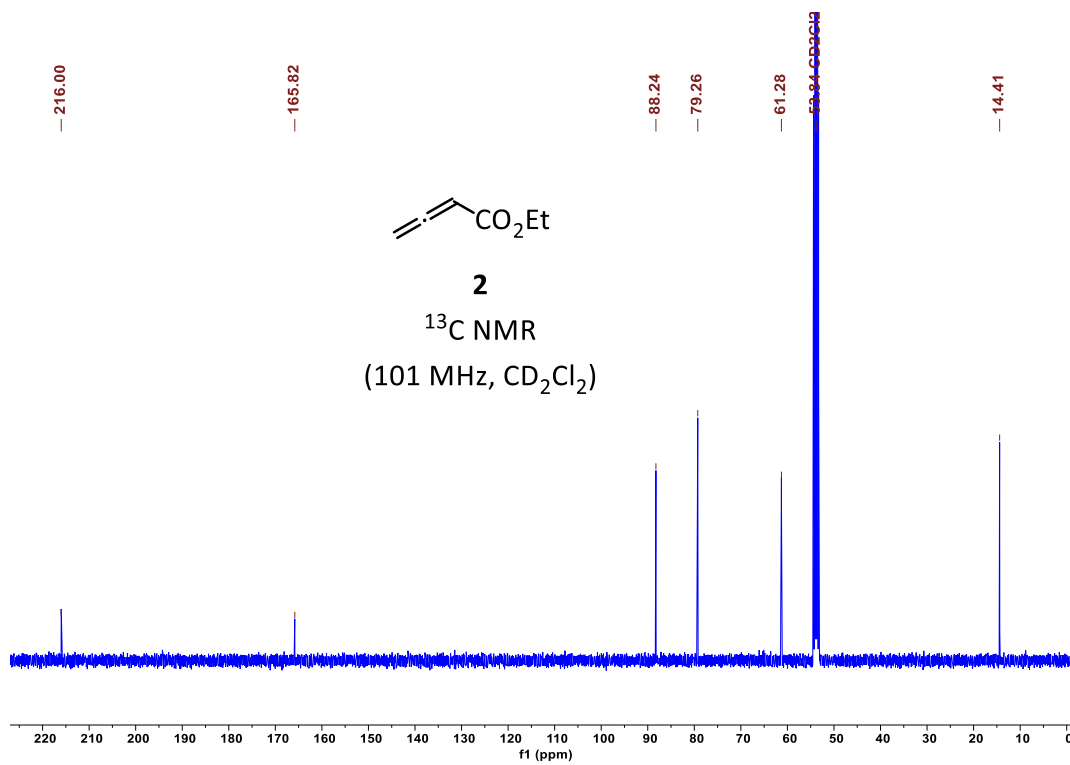

### 2.3.3 Ethyl propiolate (3)

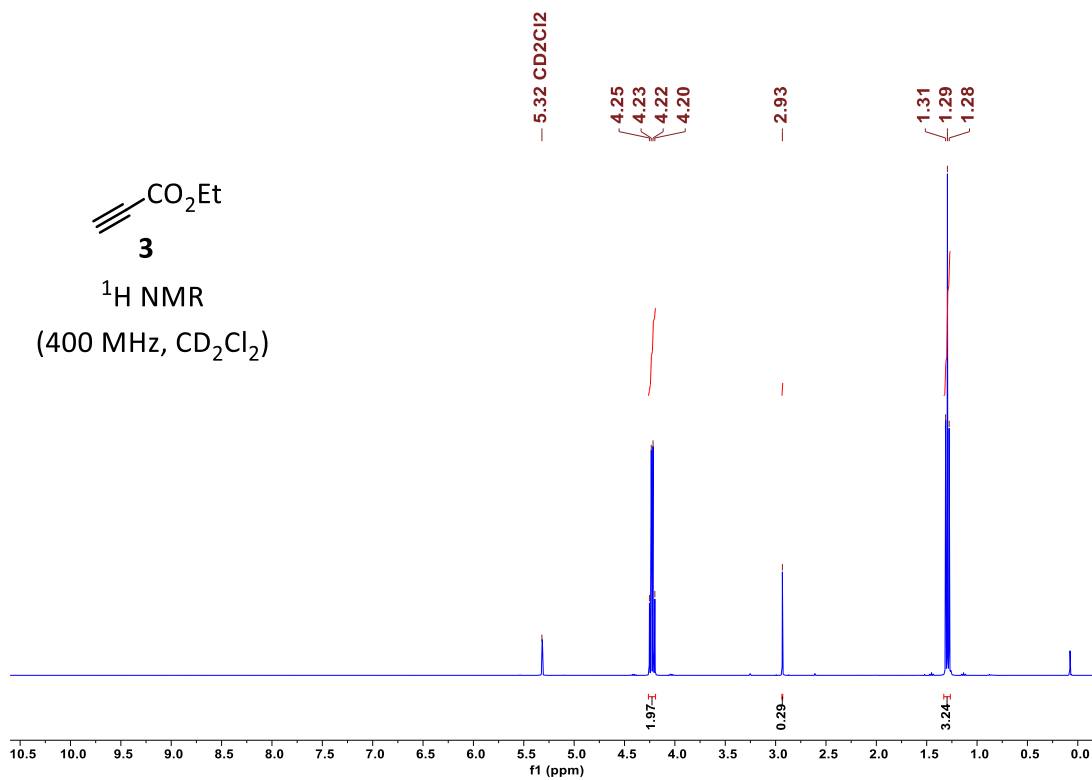

f500

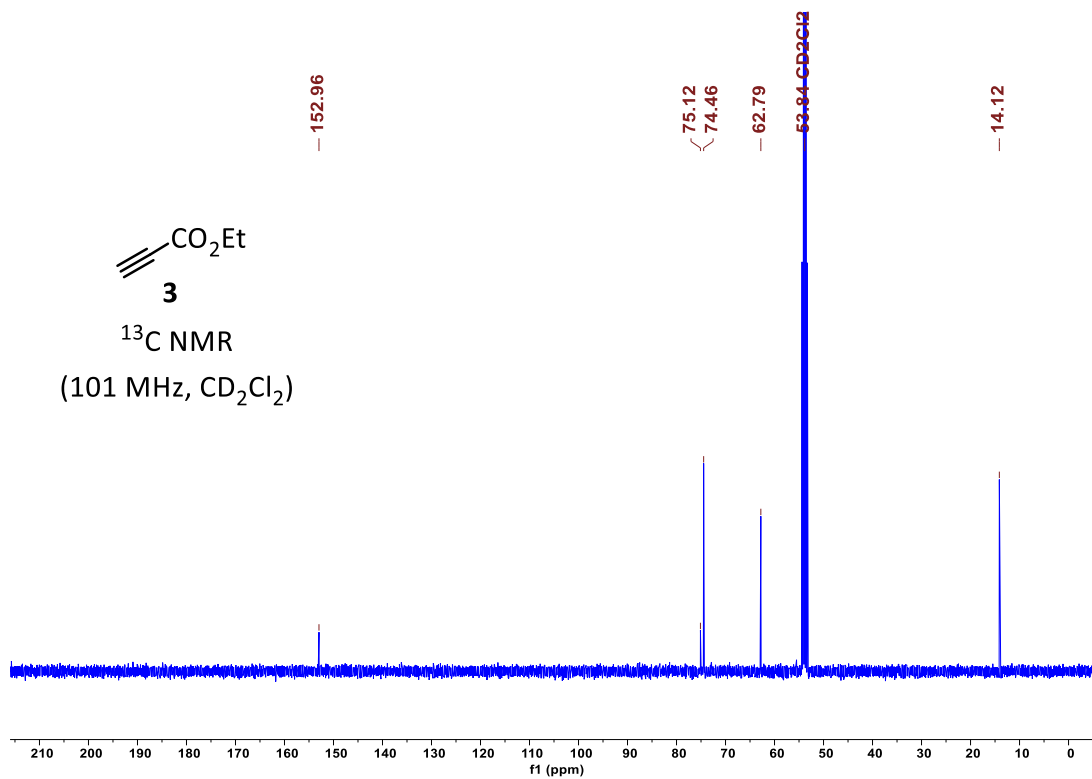



### 2.3.4 Ethenesulfonylfluoride (ESF, 4)

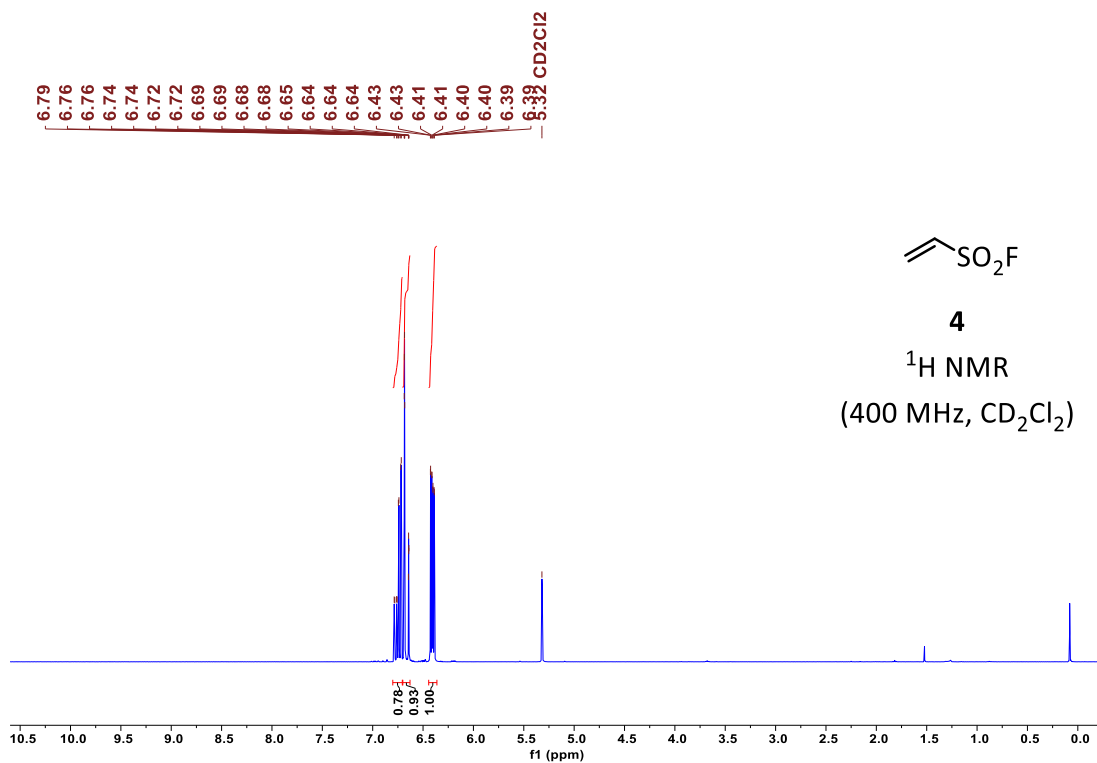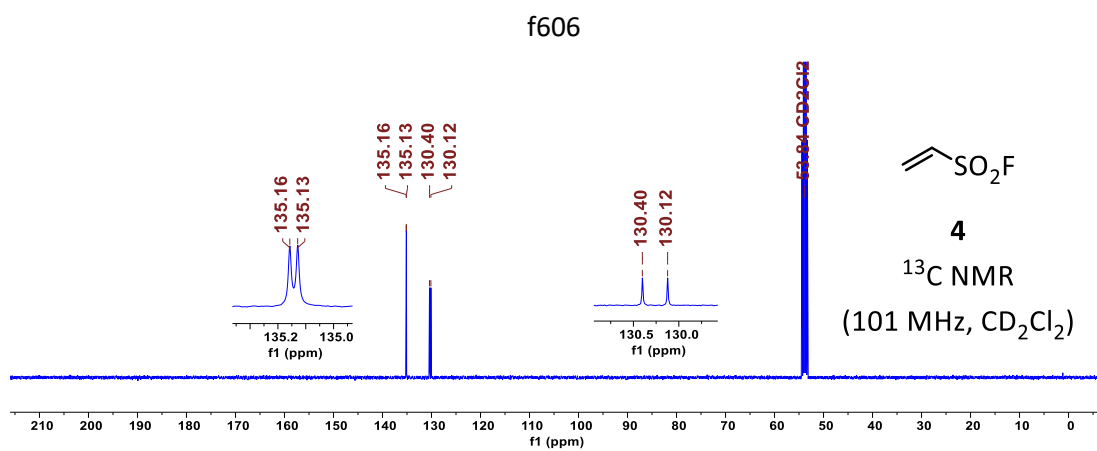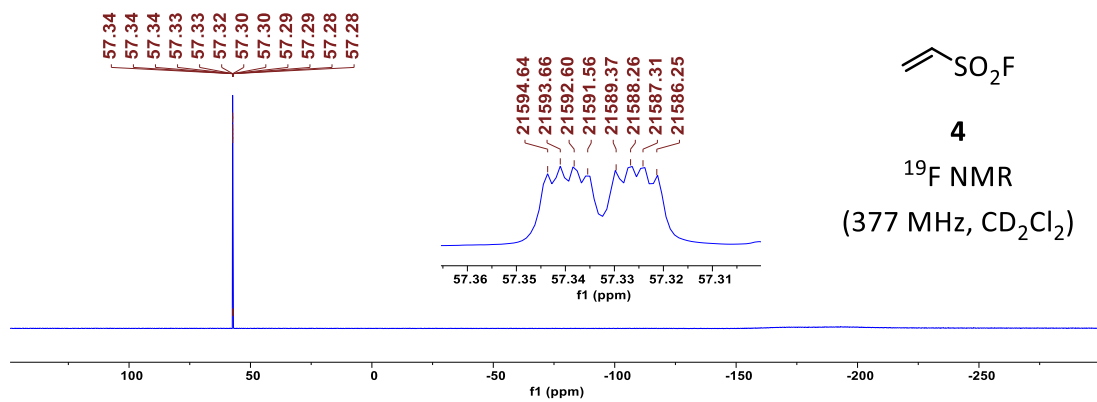

### 2.3.5 Ethyl 2-butynoate (5)

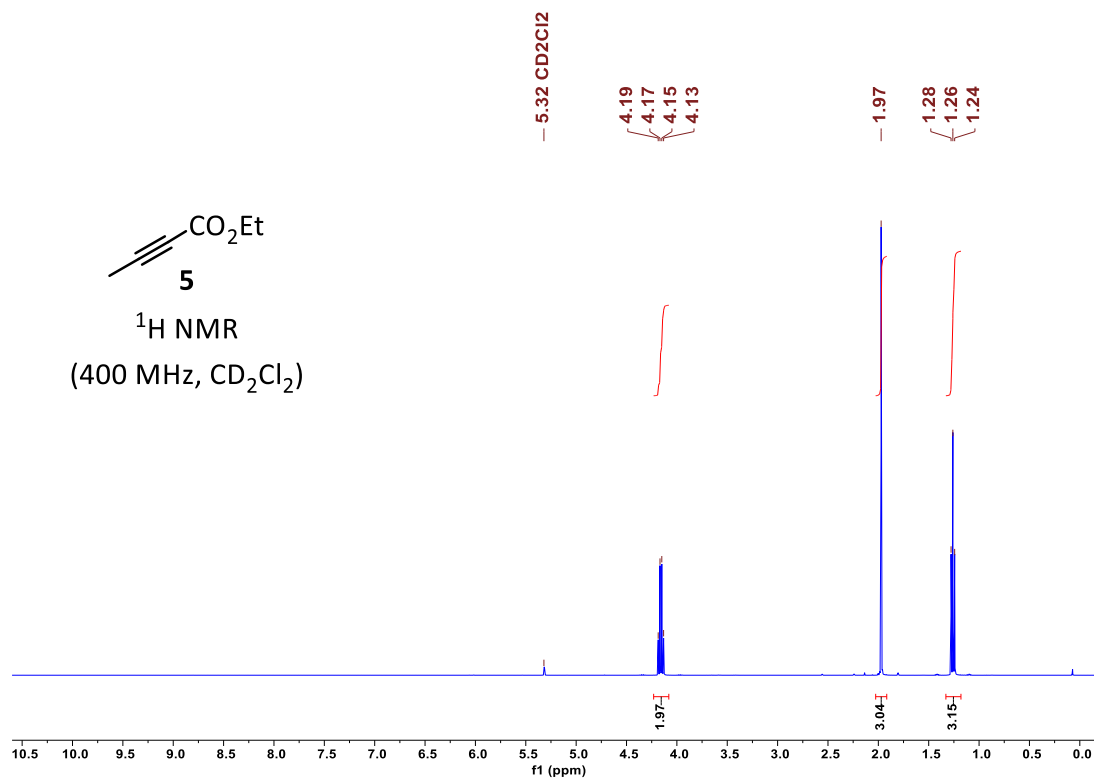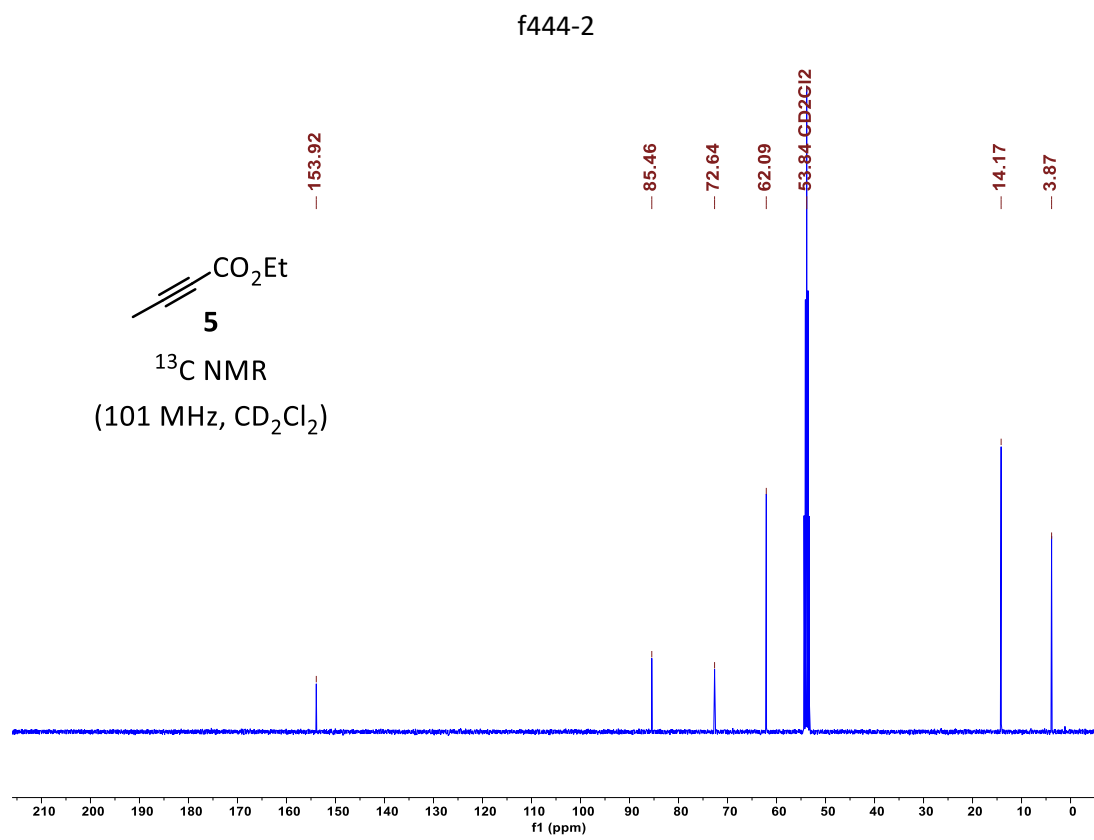

### 2.3.6 Tris(4-fluorophenyl)phosphine P(pfp)<sub>3</sub>

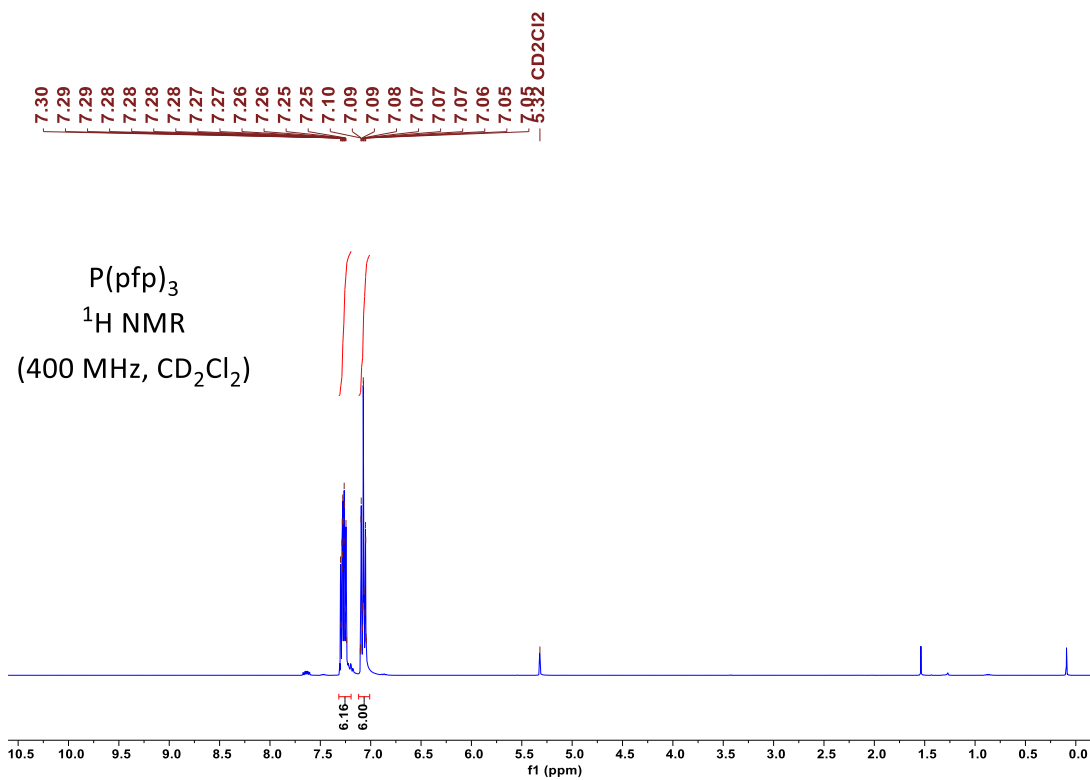

f409

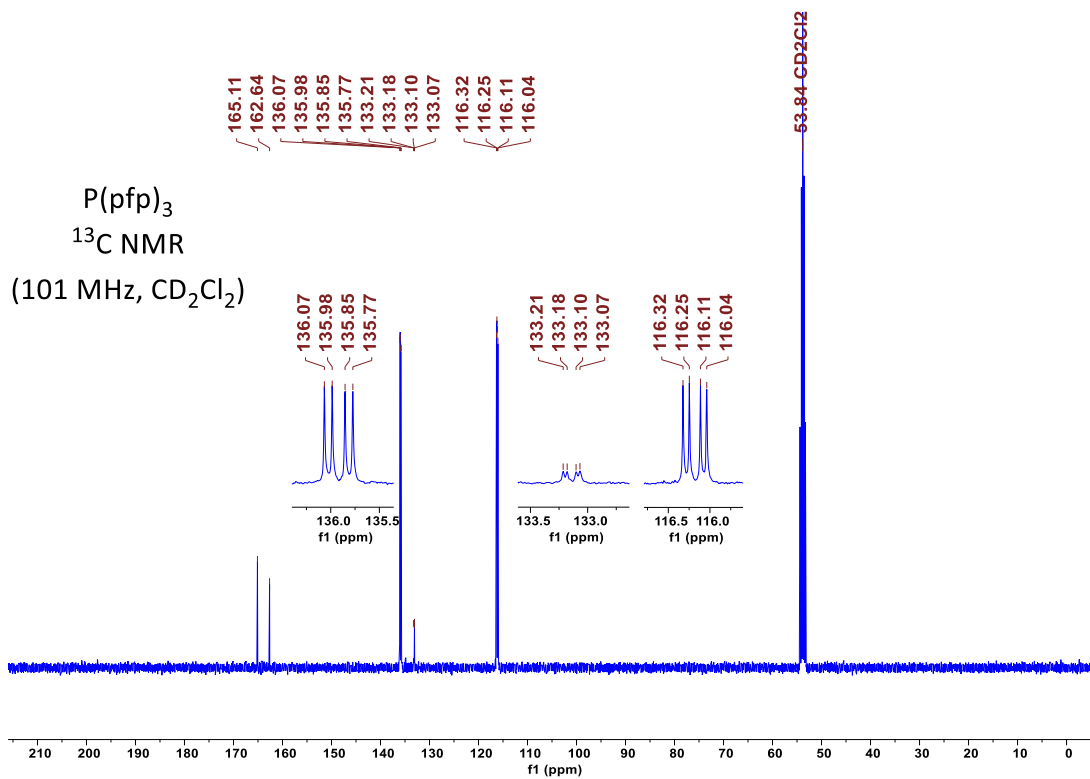

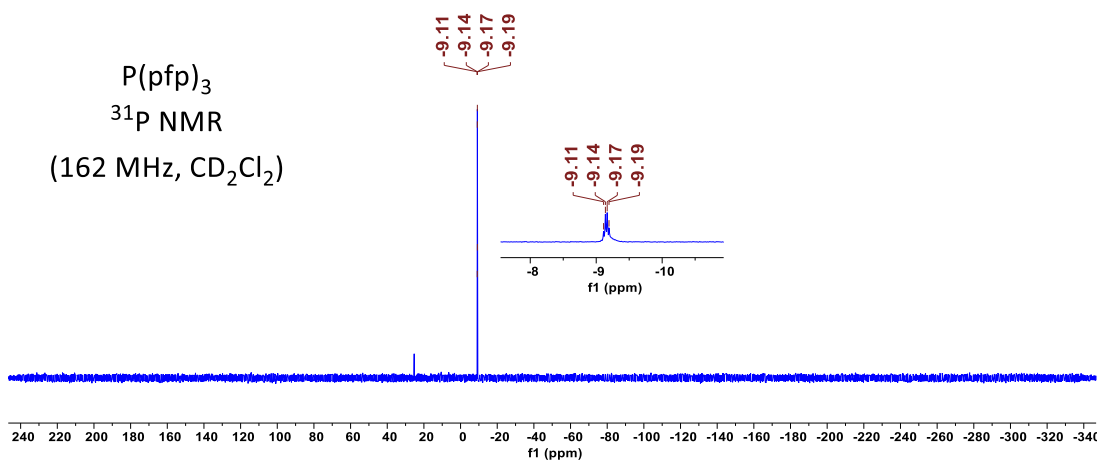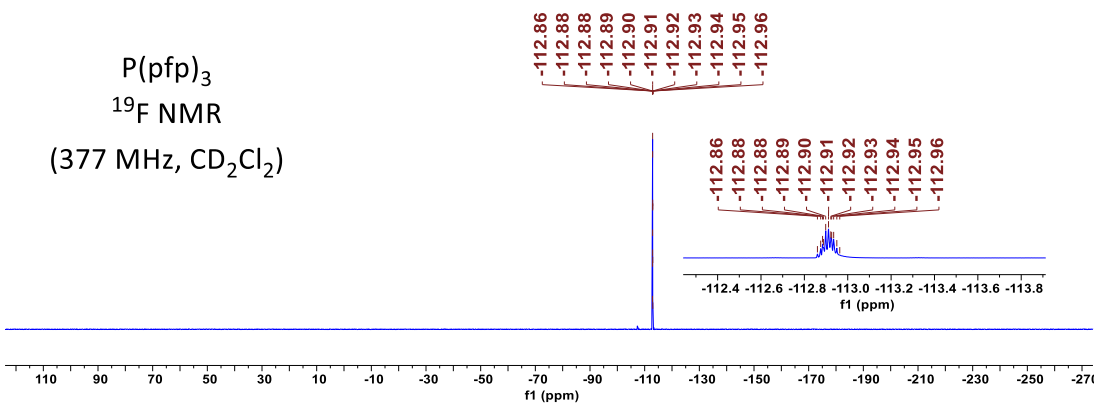

### 2.3.7 Triphenylphosphine PPh<sub>3</sub>

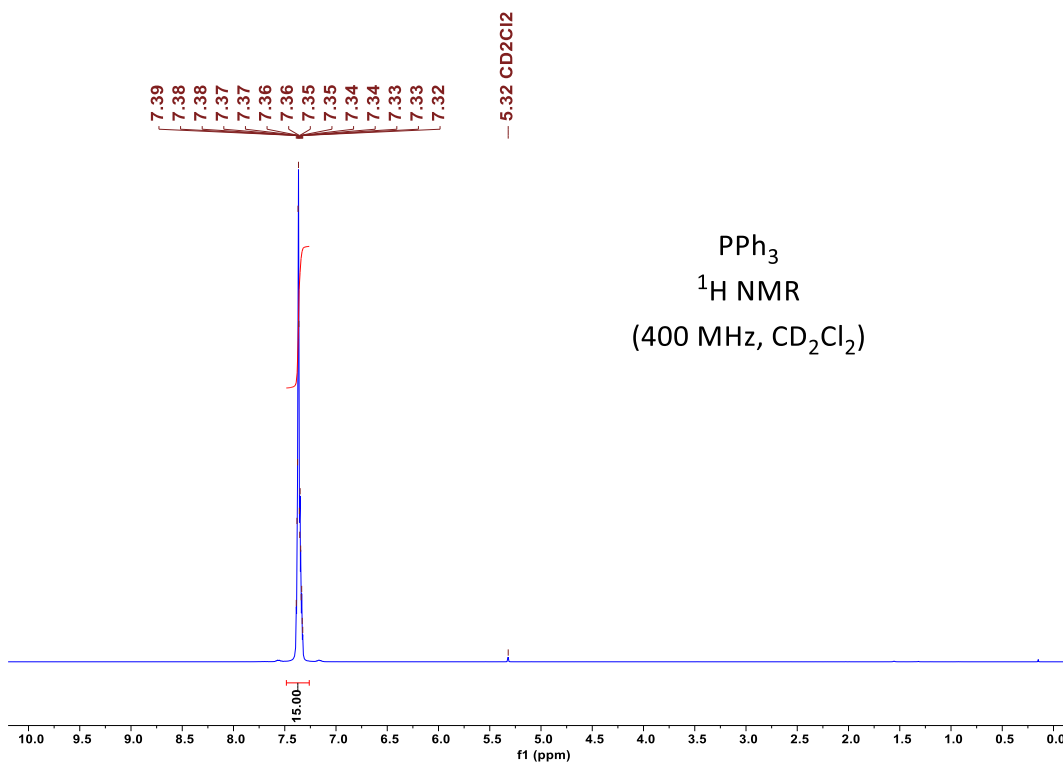

f363

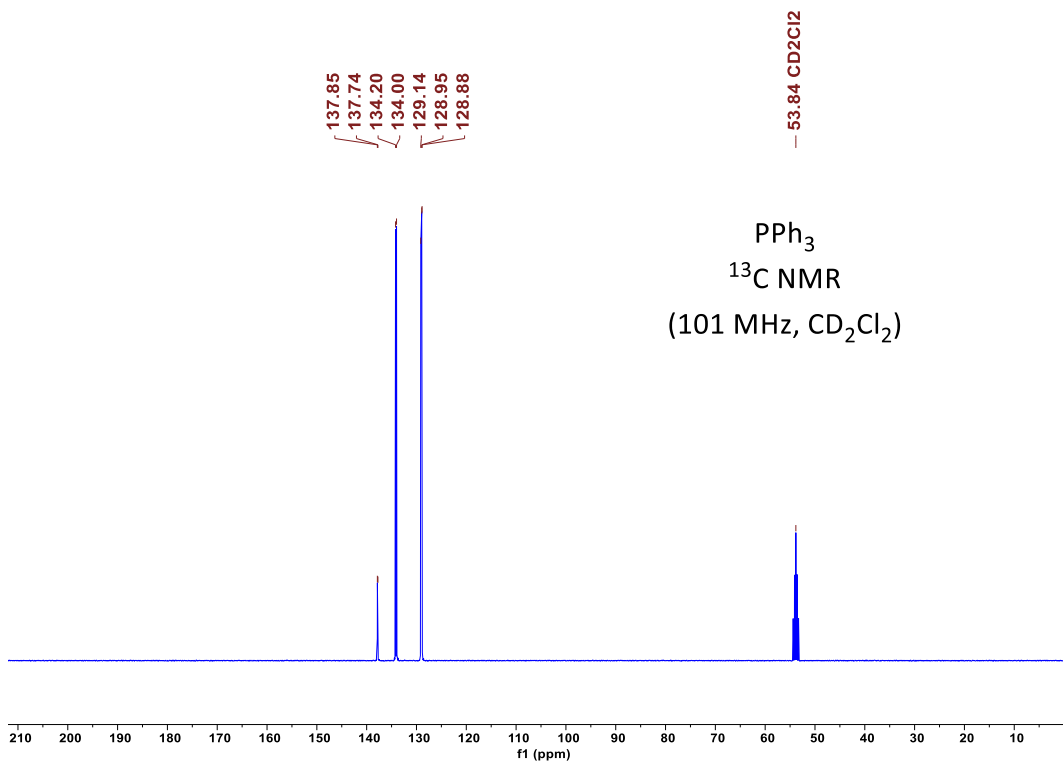

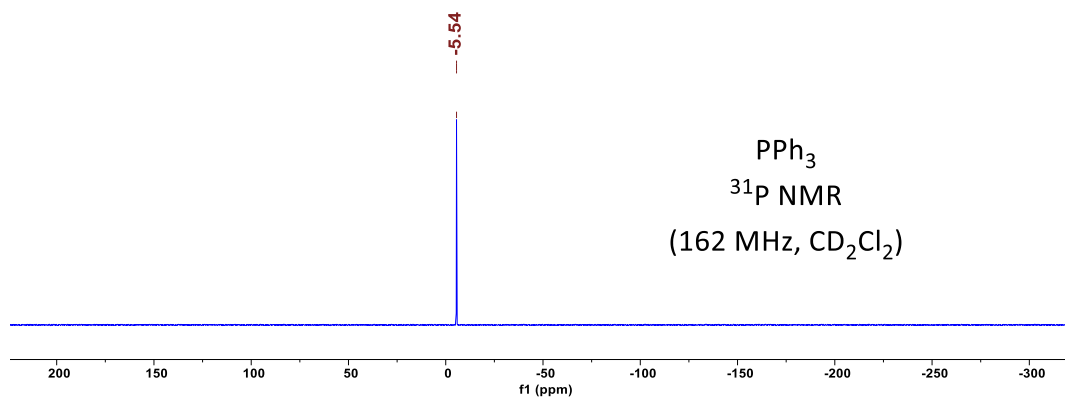

### 2.3.8 Triphenylphosphonium triflate (TPPT)

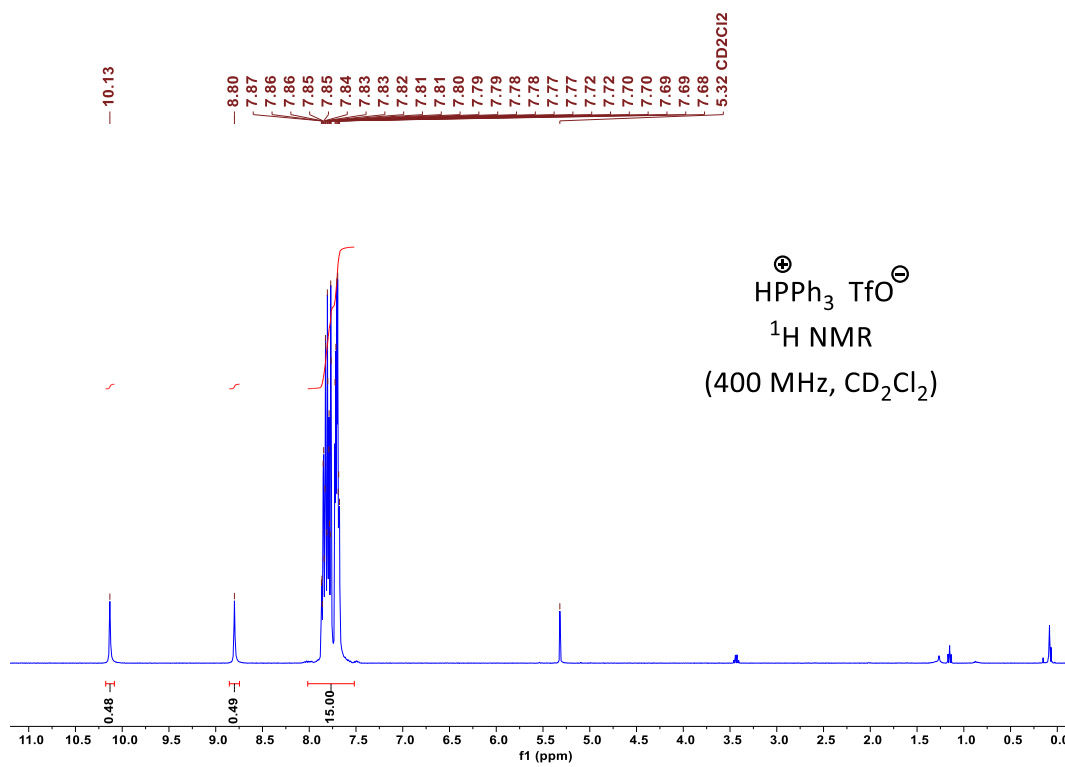

f372

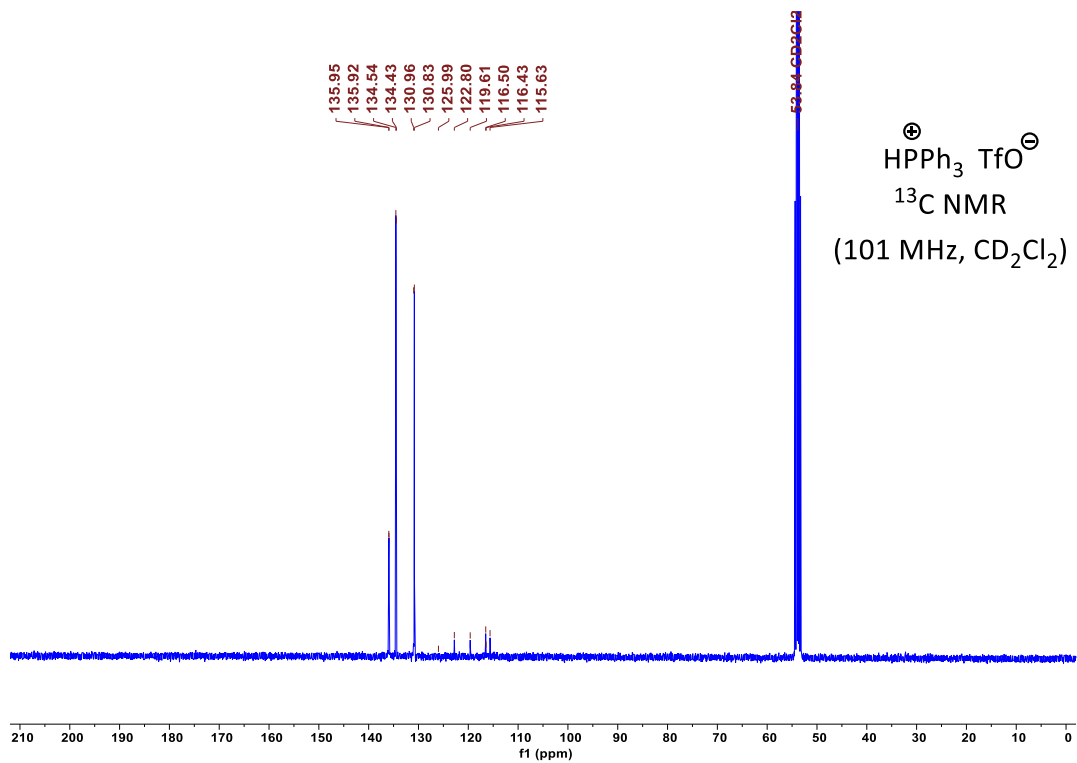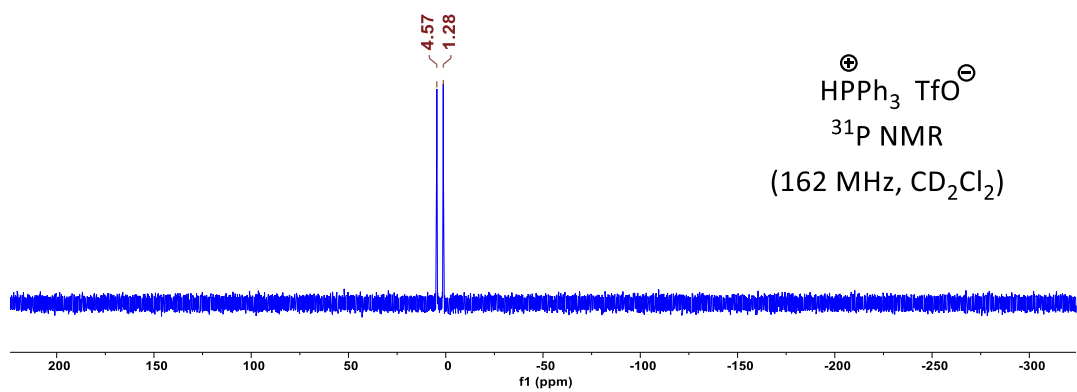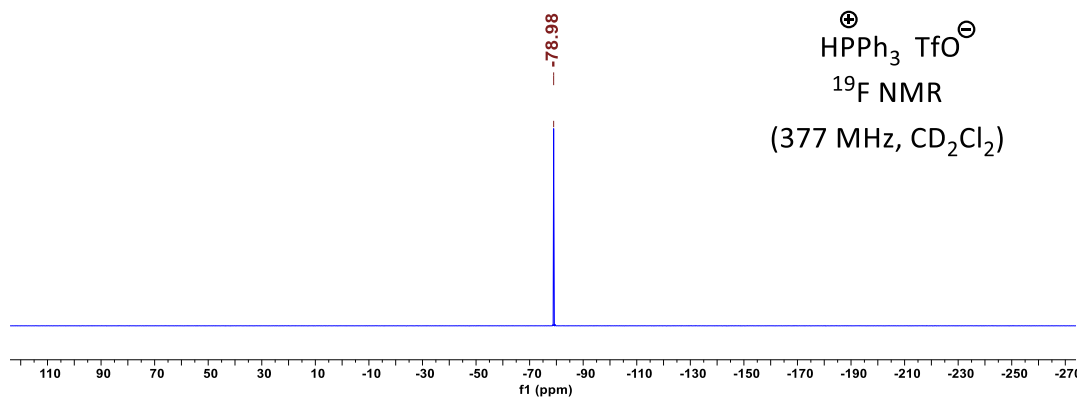

### 2.3.9 Tris(4-methoxyphenyl)phosphine P(ani)<sub>3</sub>

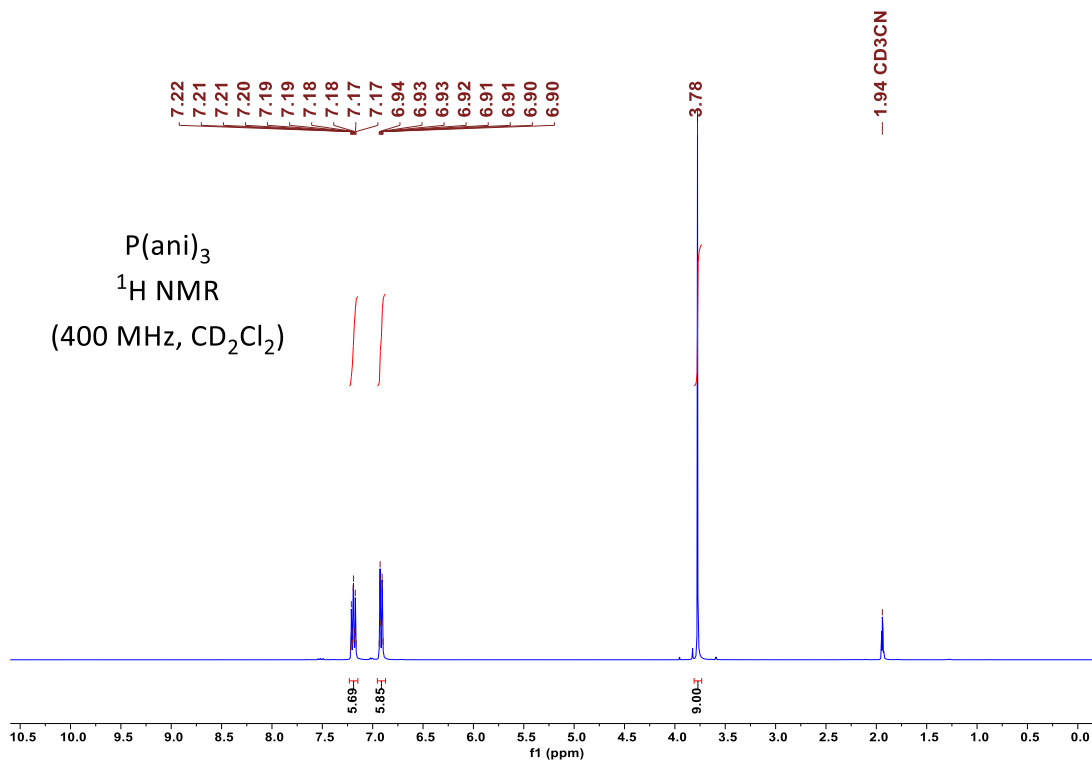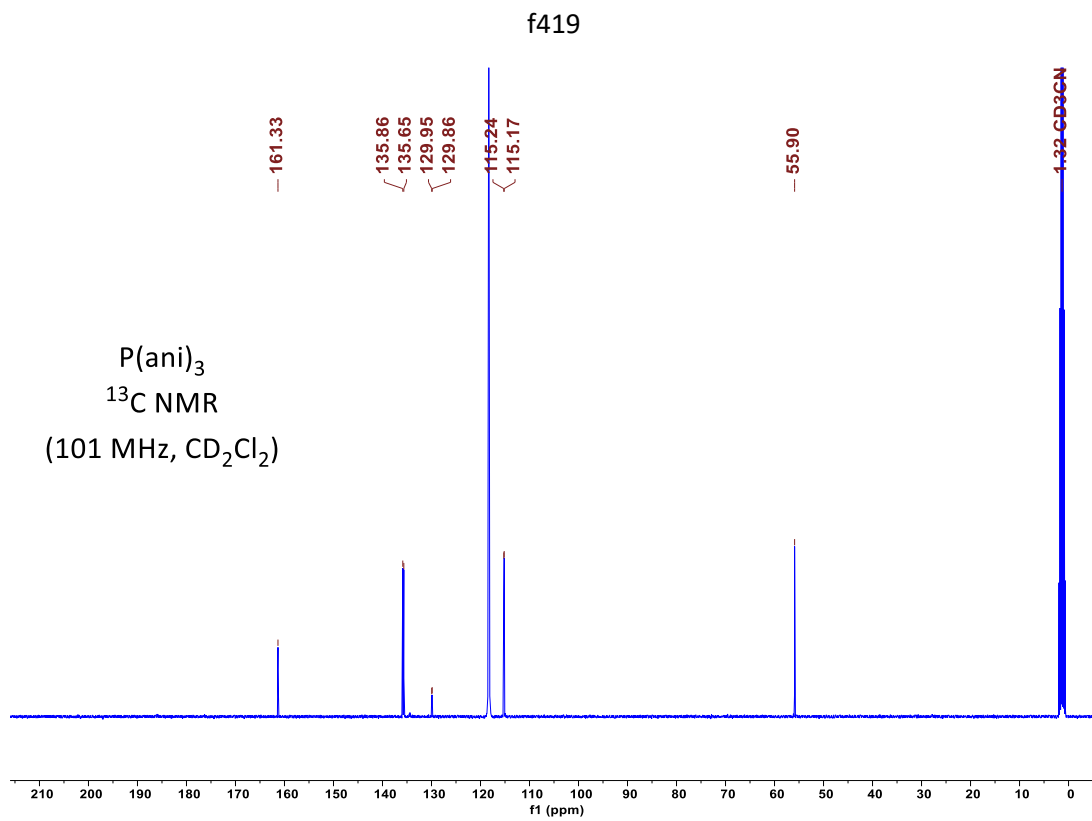



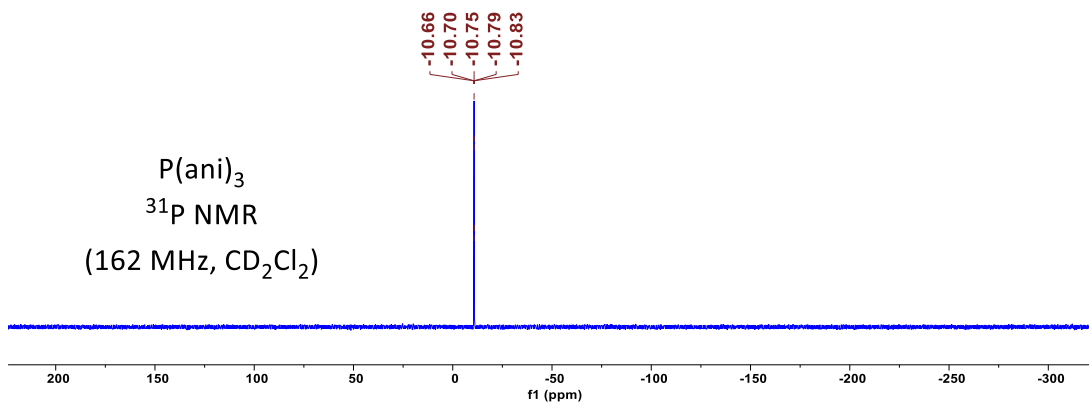

### 2.3.10 Methylphenylphosphine $\text{PMePh}_2$

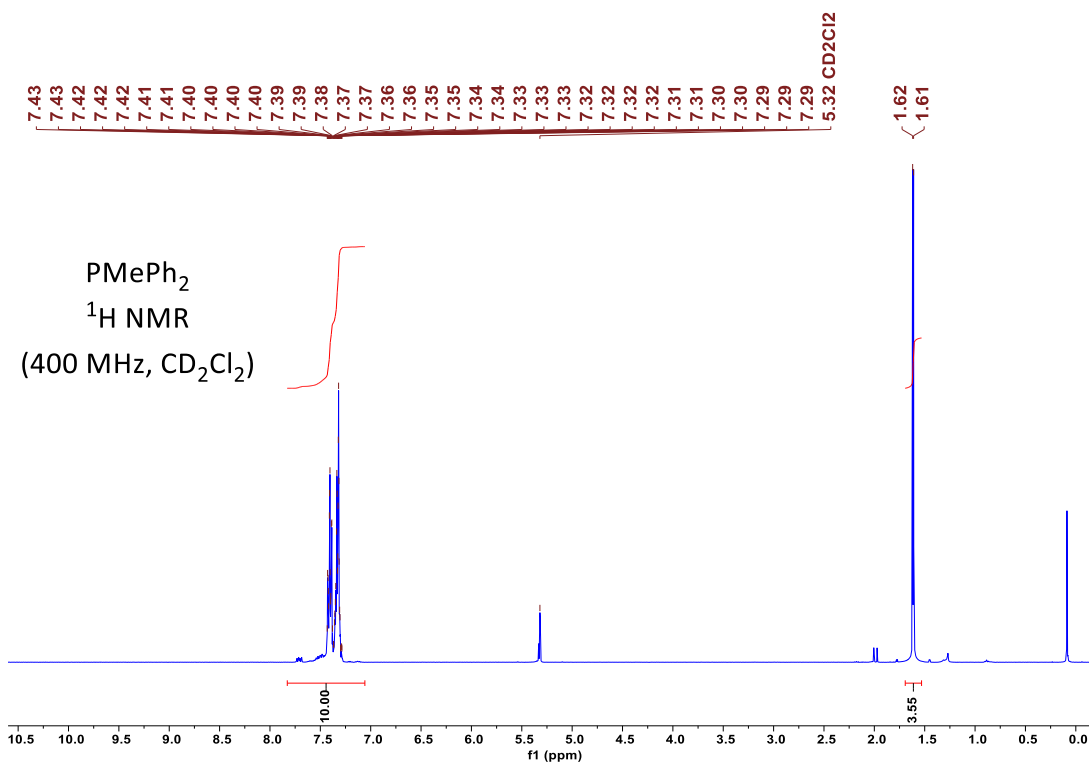

f390

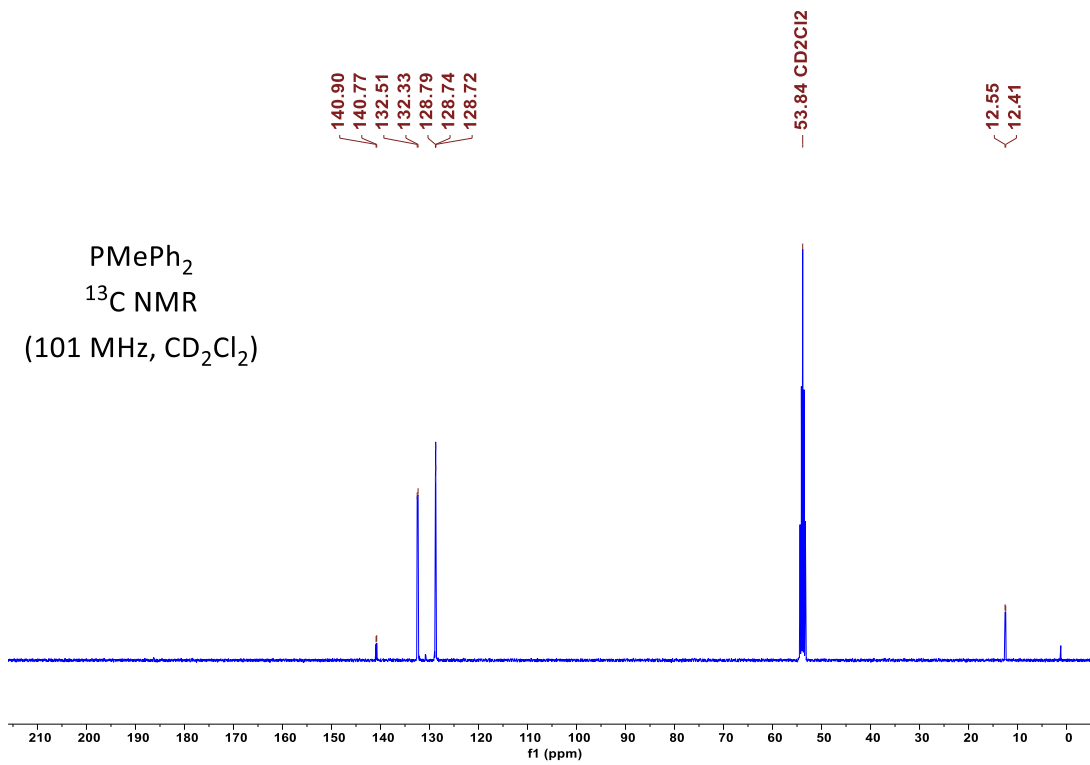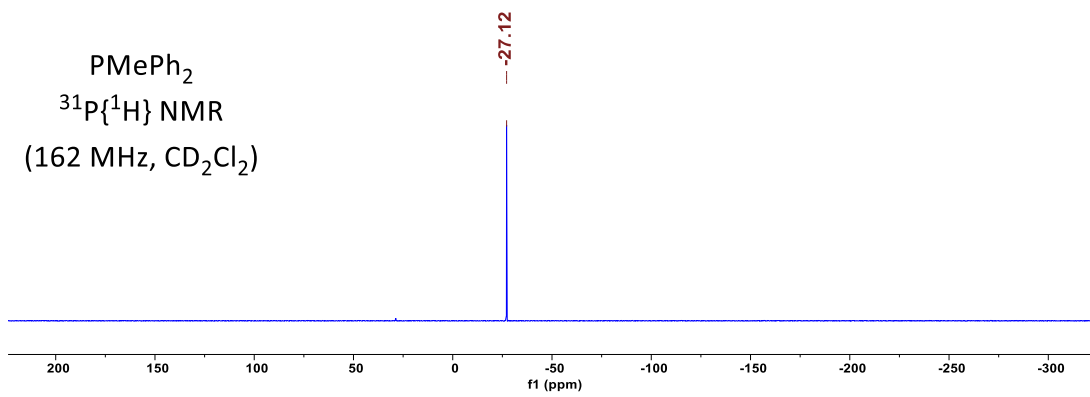

### 2.3.11 Methylphenylphosphonium triflate

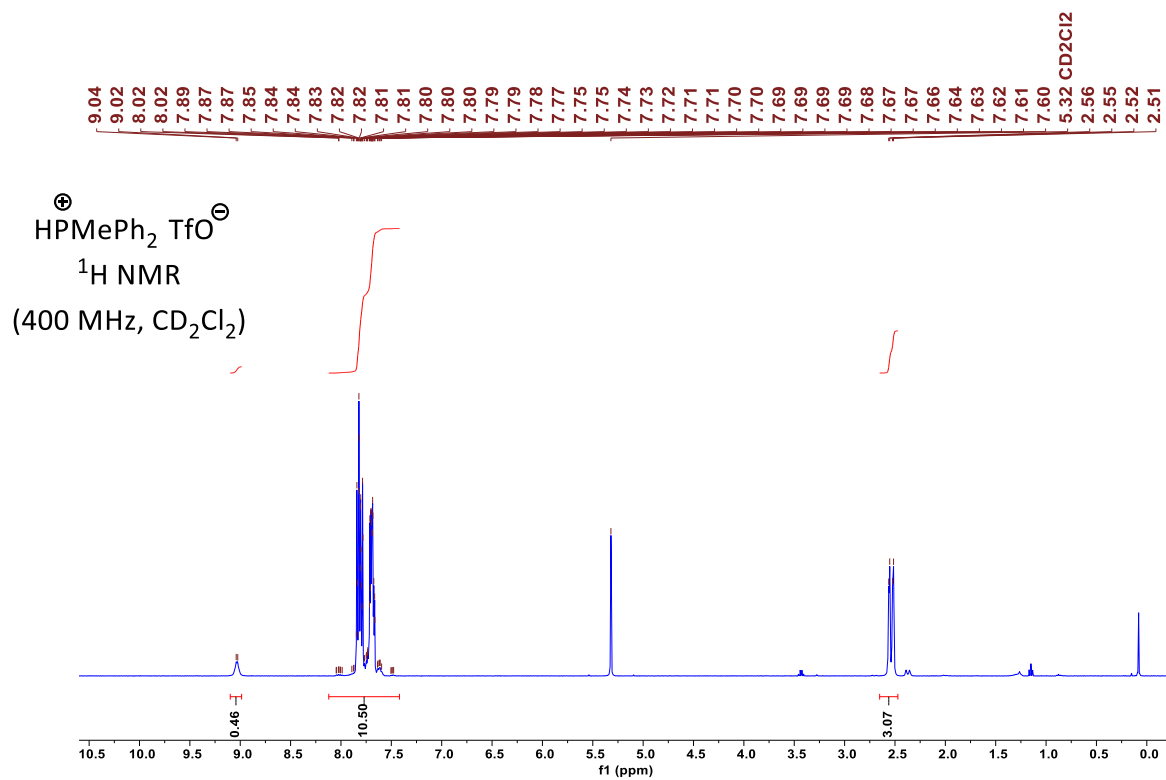

f518

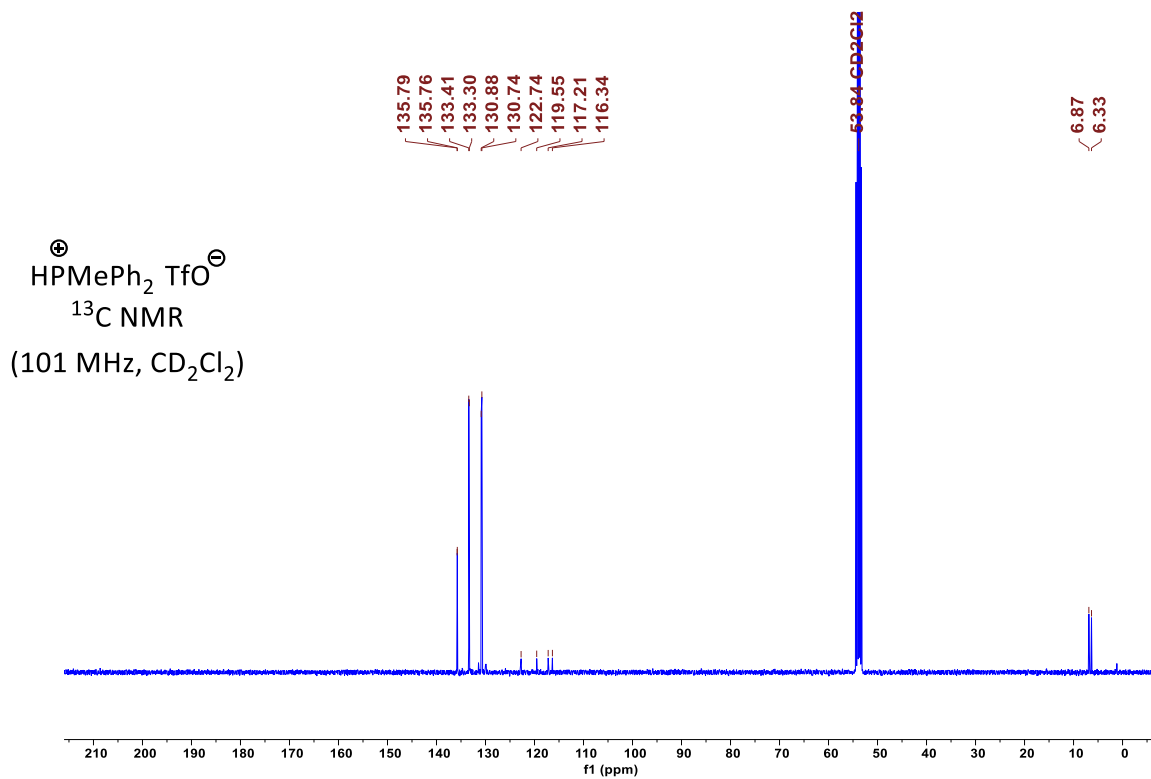

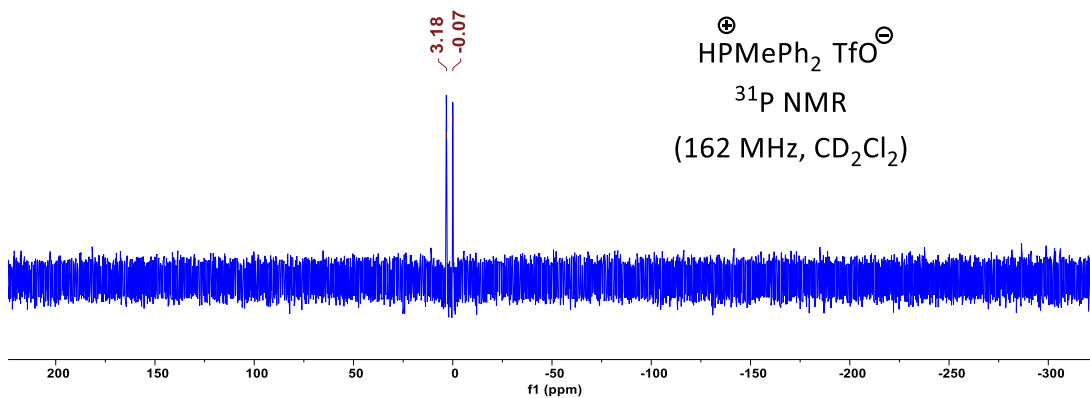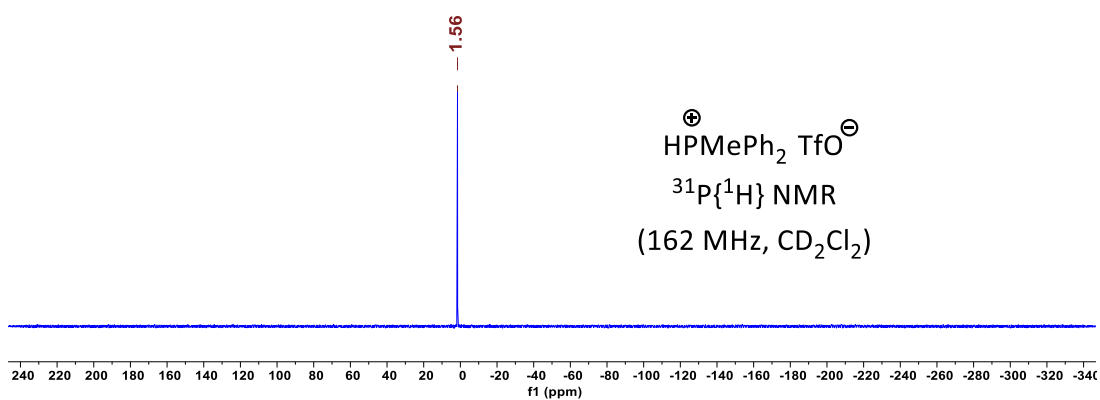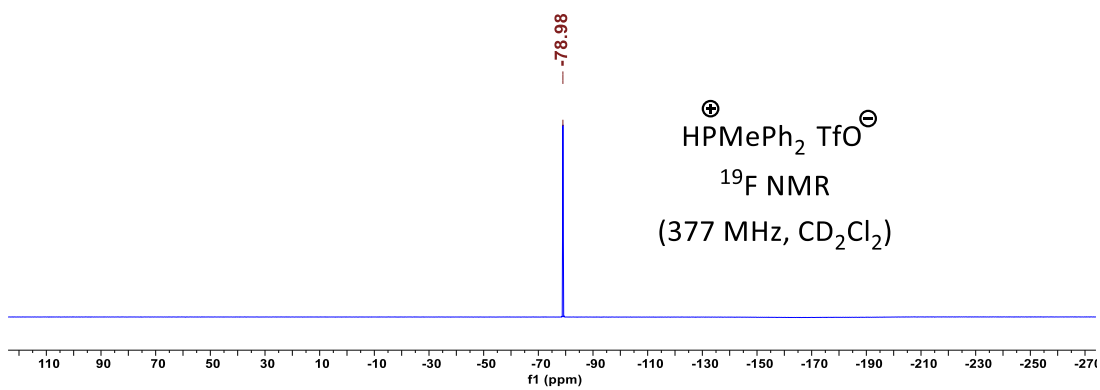

### 2.3.12 Dimethyl(phenyl)phosphine

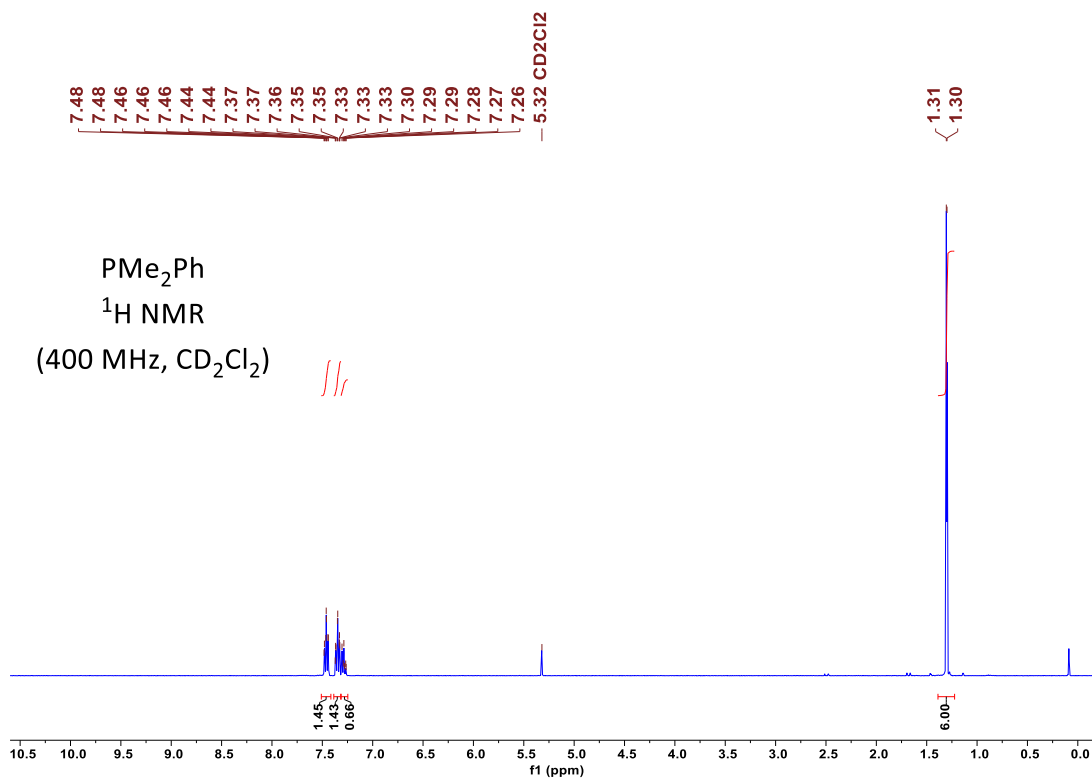

f393

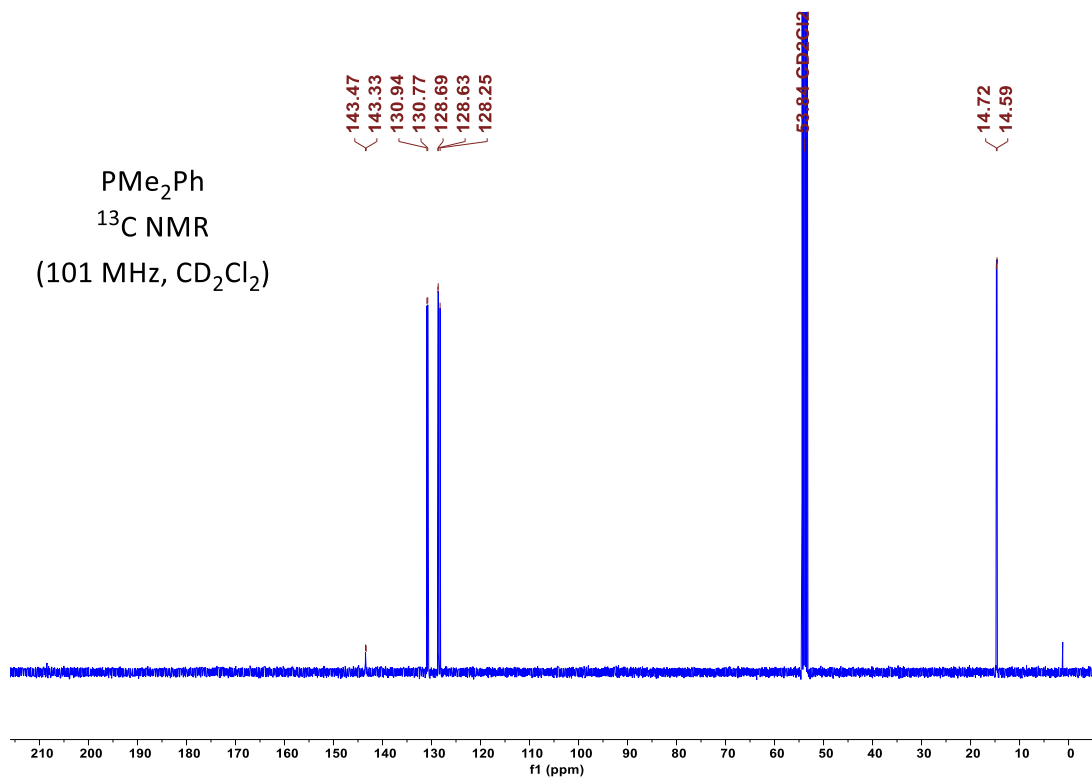

PMe<sub>2</sub>Ph  
<sup>31</sup>P{<sup>1</sup>H} NMR  
(162 MHz, CD<sub>2</sub>Cl<sub>2</sub>)

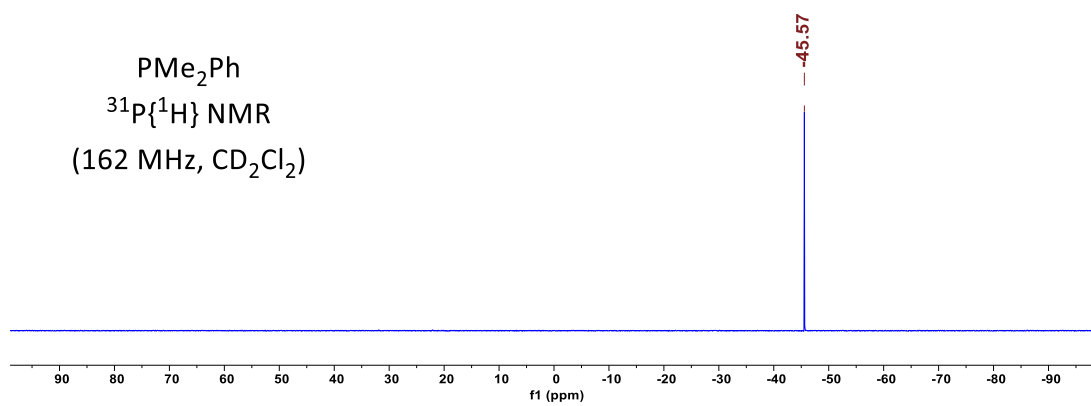

### 2.3.13 Dimethyl(phenyl)phosphonium triflate

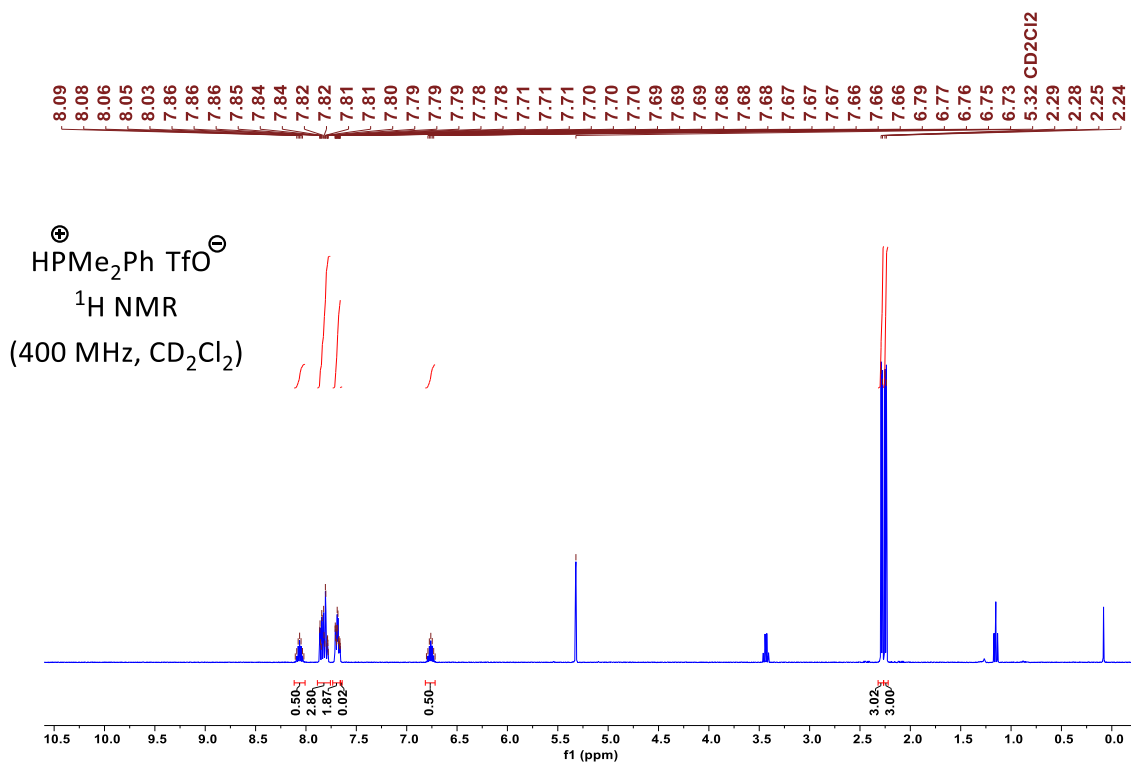

f519

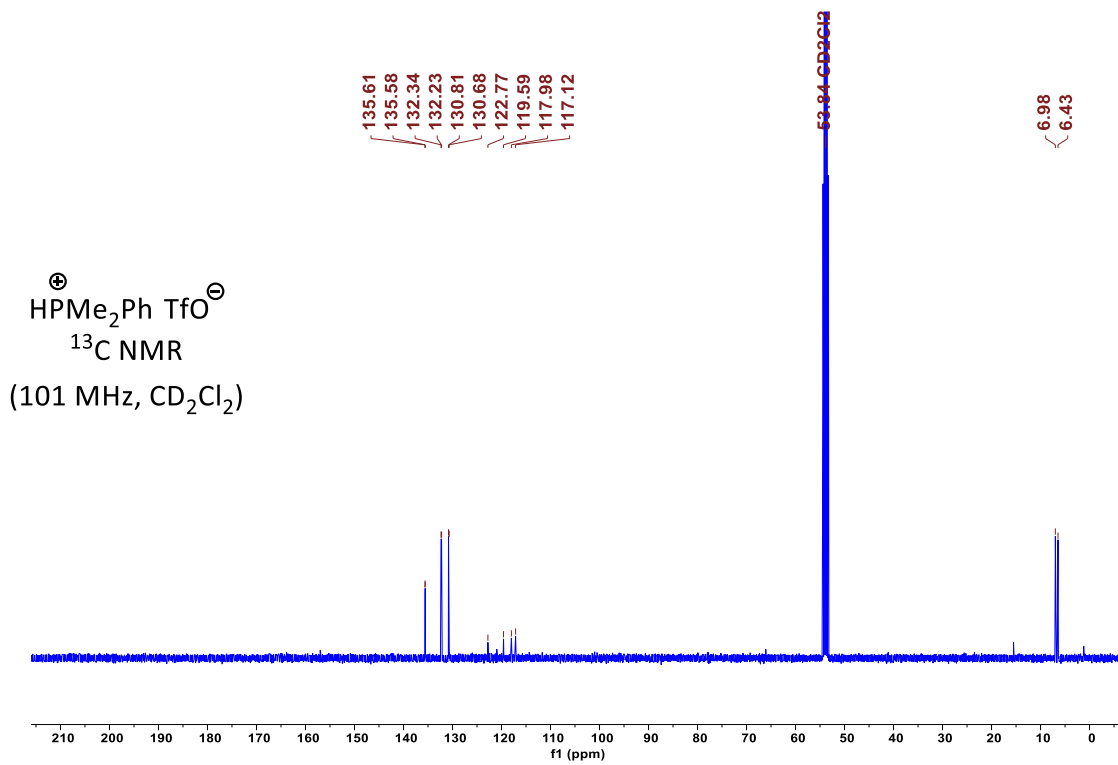

$\text{HPMe}_2\text{Ph TfO}^\ominus$   
 $^{31}\text{P NMR}$   
 (162 MHz,  $\text{CD}_2\text{Cl}_2$ )

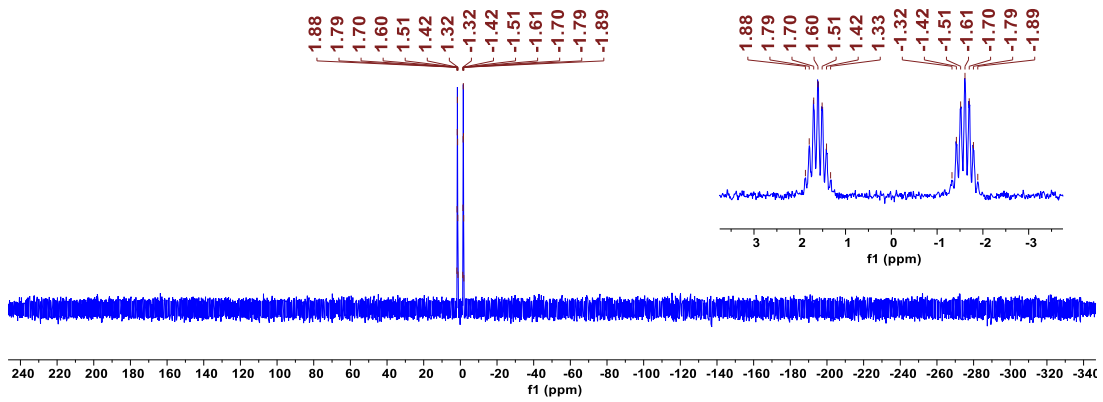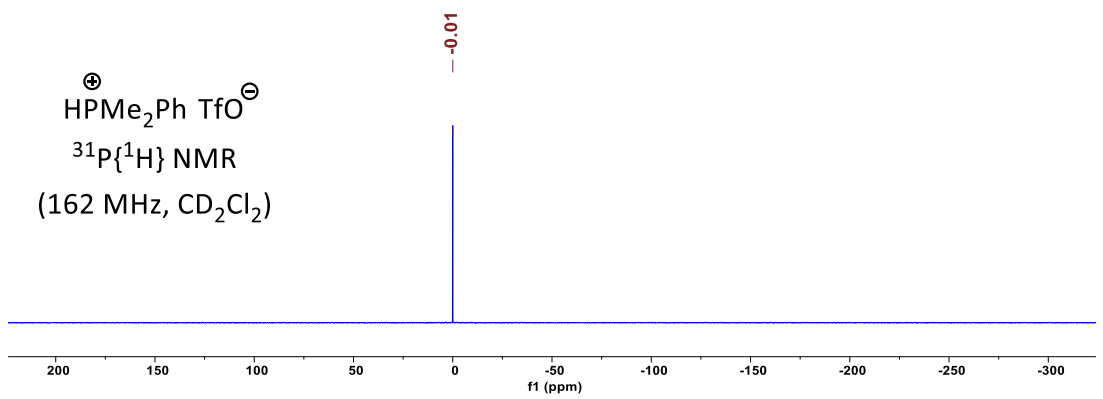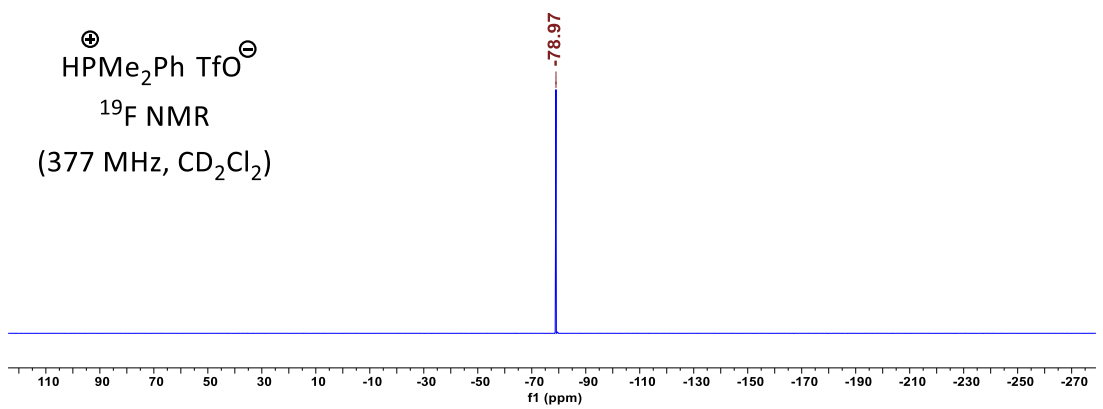



### 2.3.14 Tributylphosphine

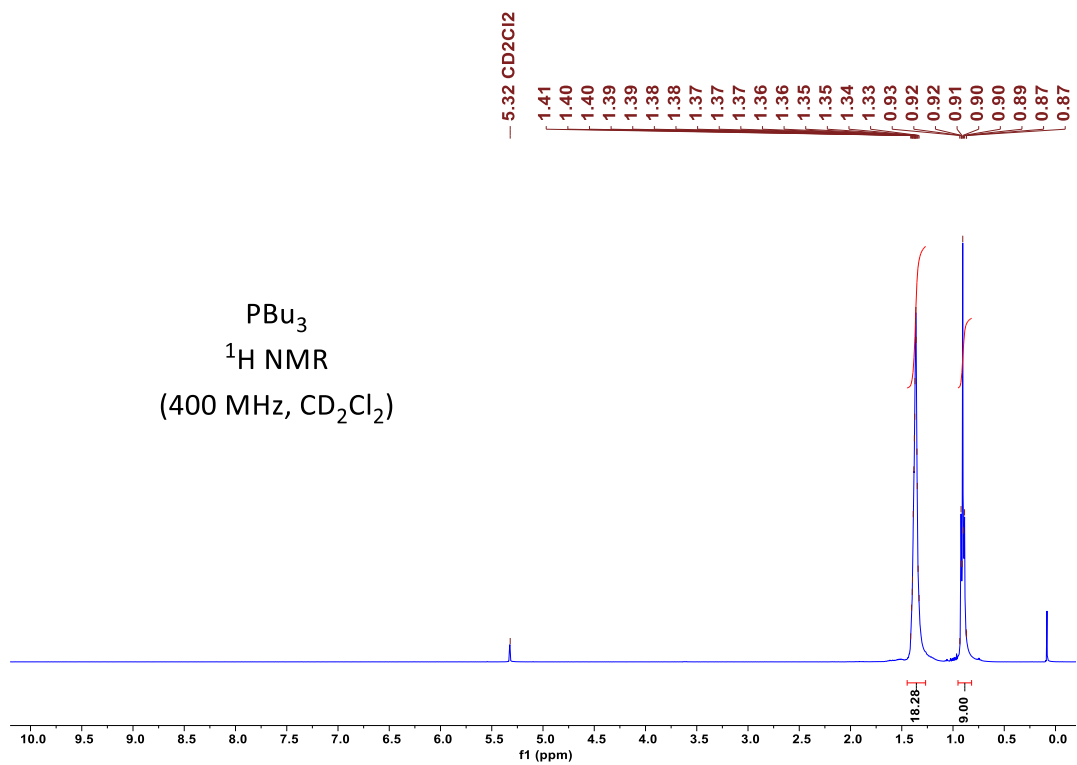

f416

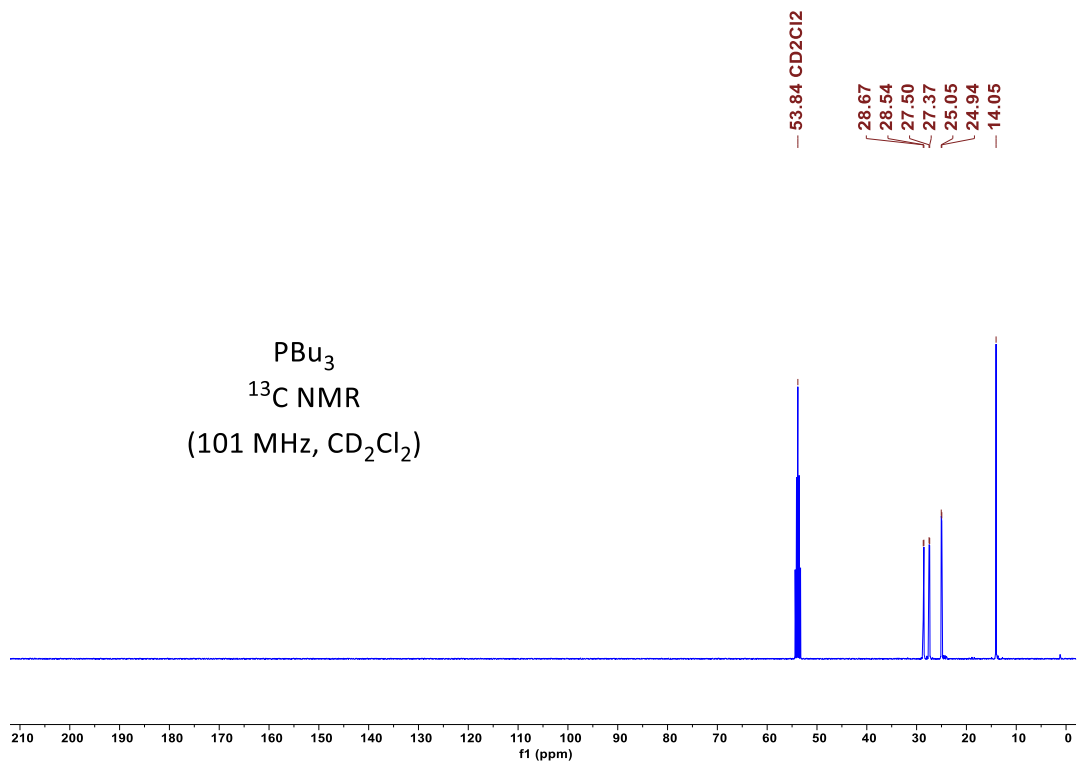

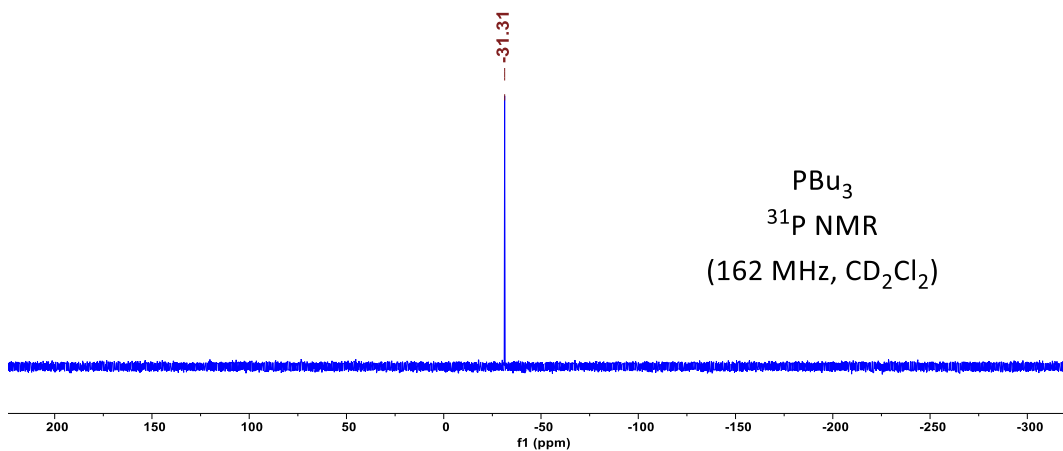

### 2.3.15 Tributylphosphonium triflate (TBPT)

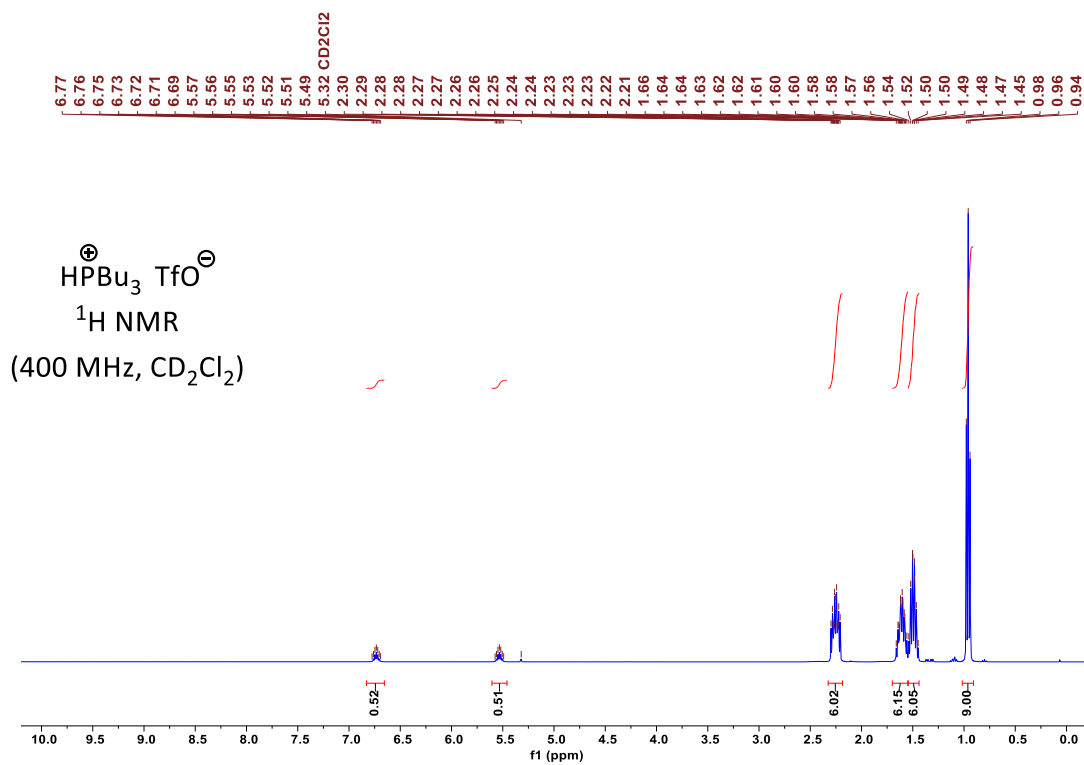

f214

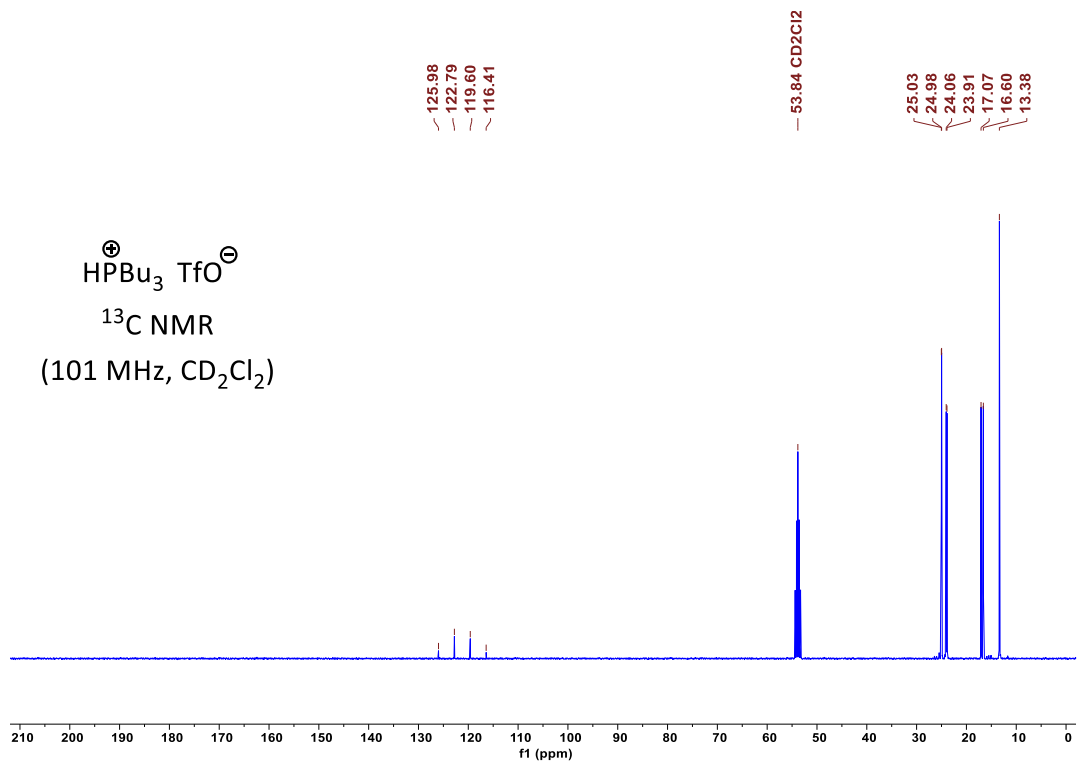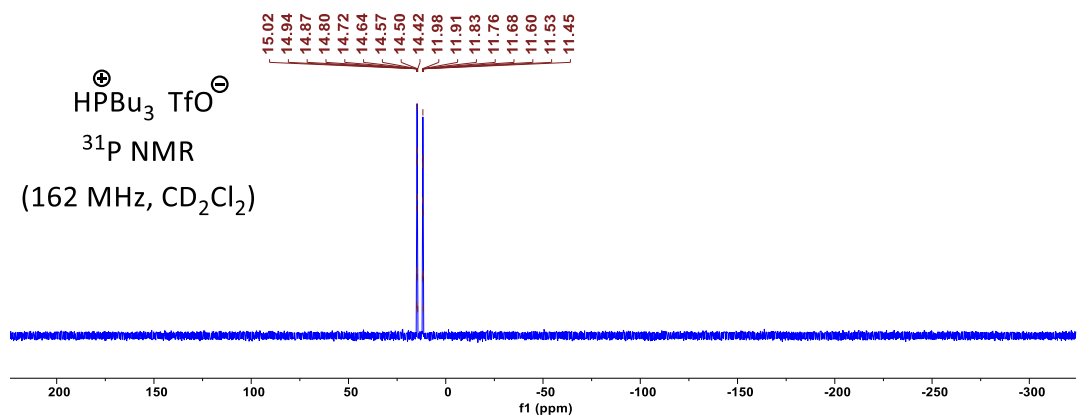

### 2.3.16 Trimethylphosphonium tetrafluoroborate

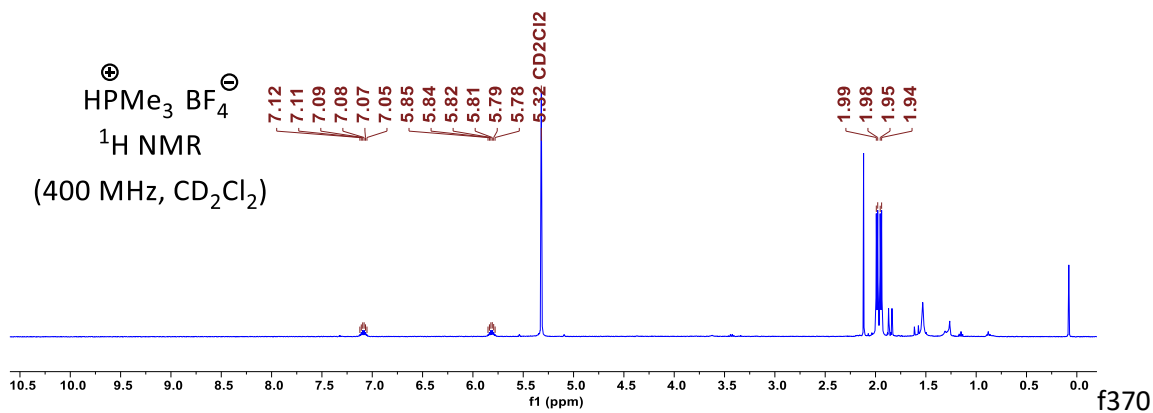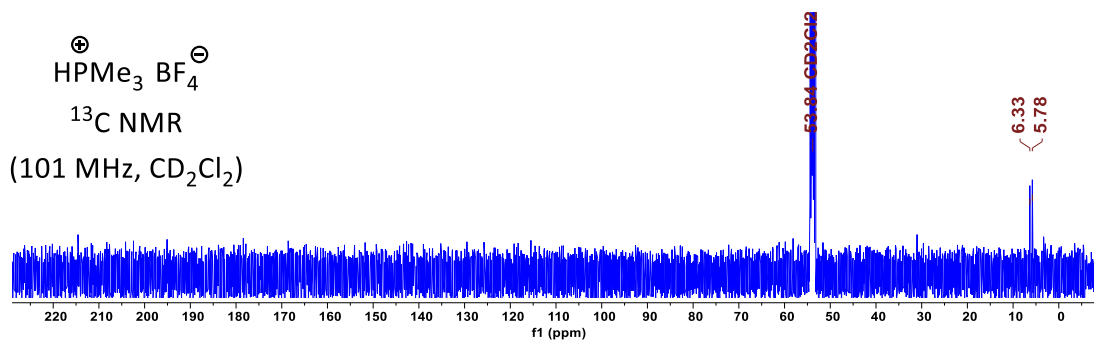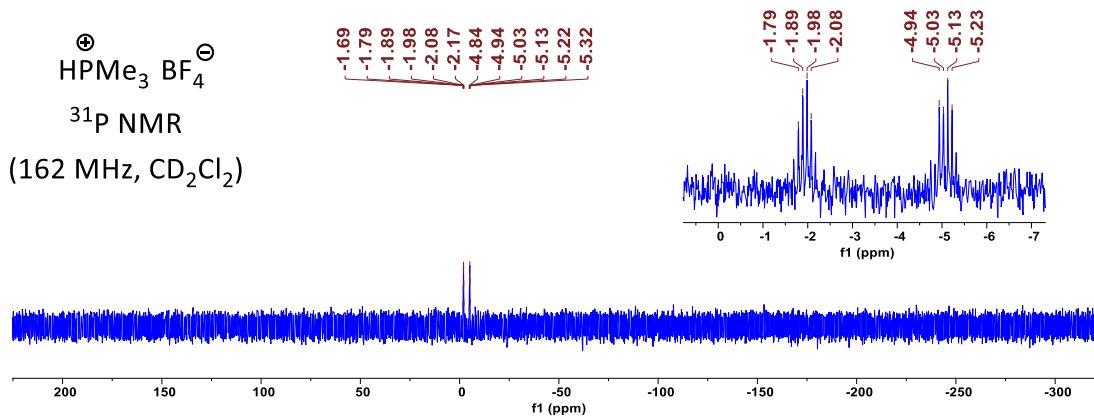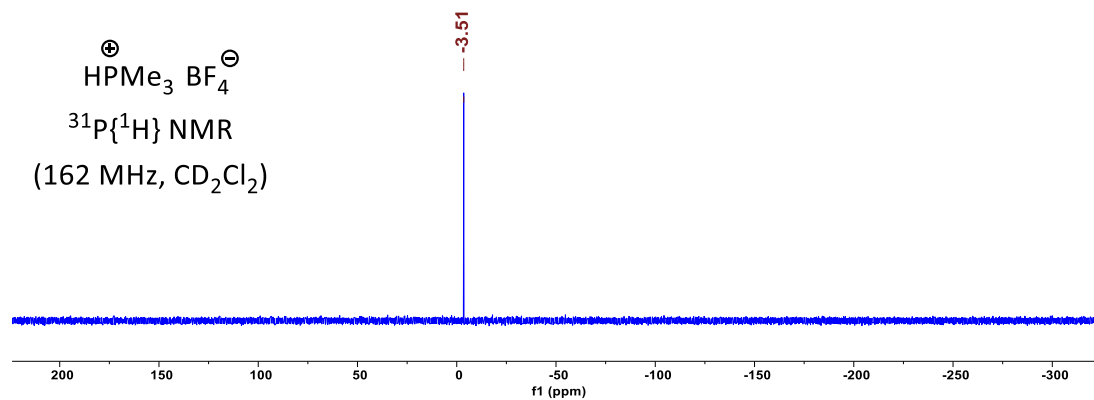

### 2.3.17 Tricyclohexylphosphonium triflate

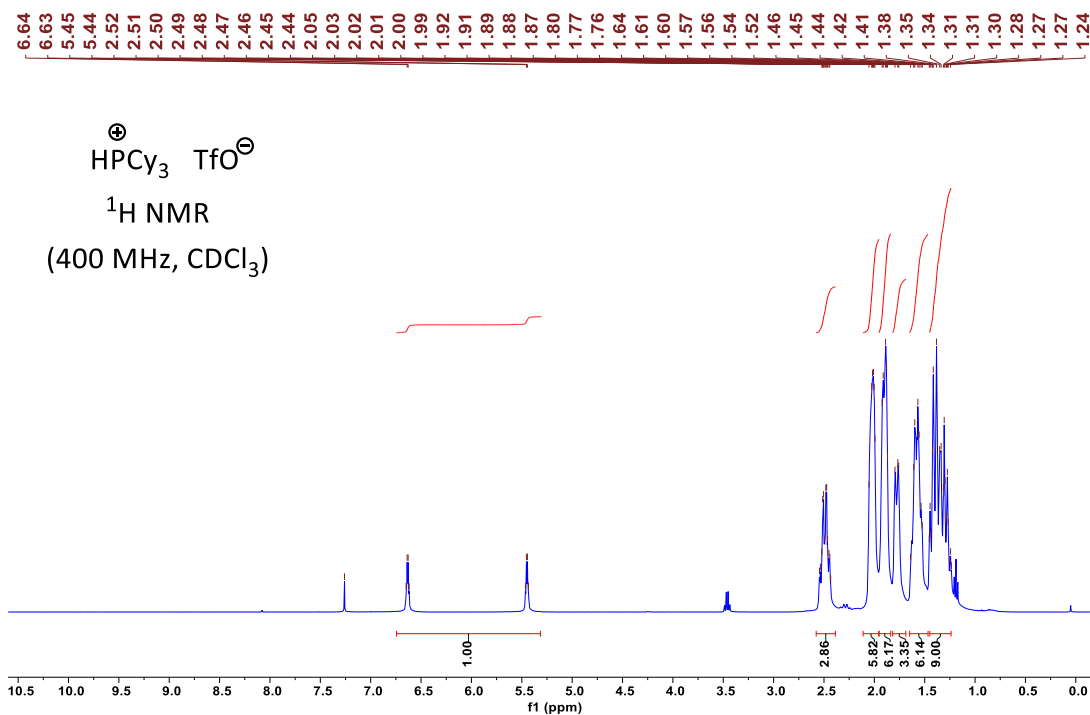

f414

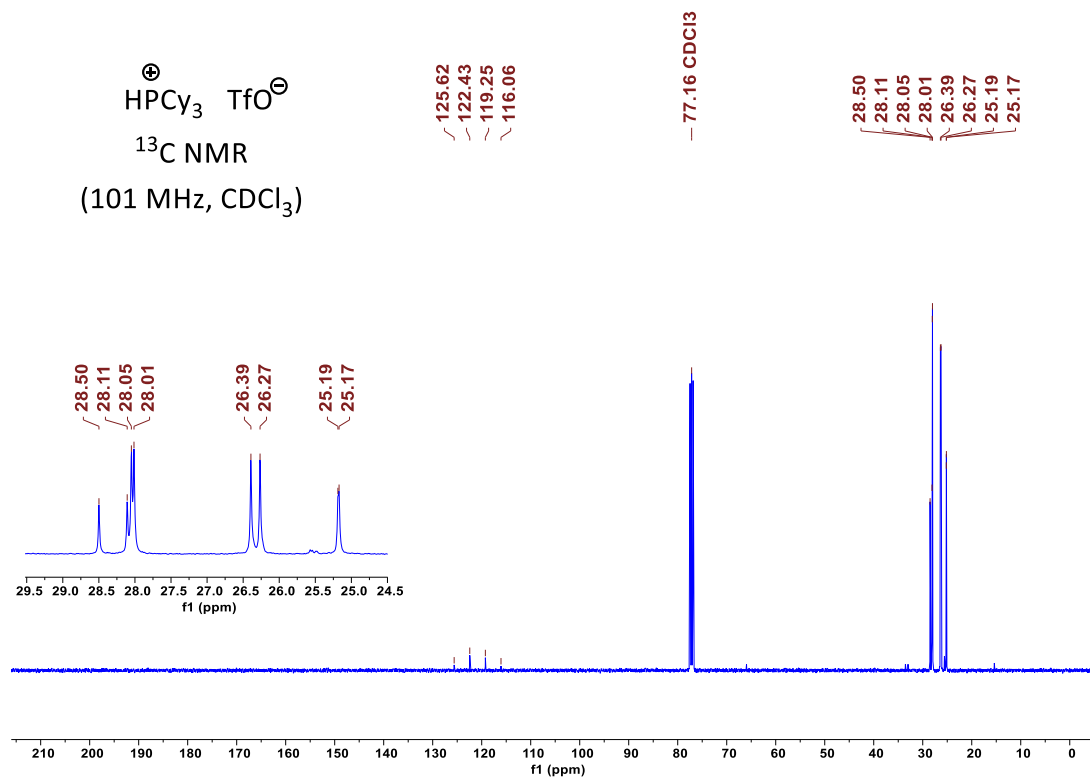

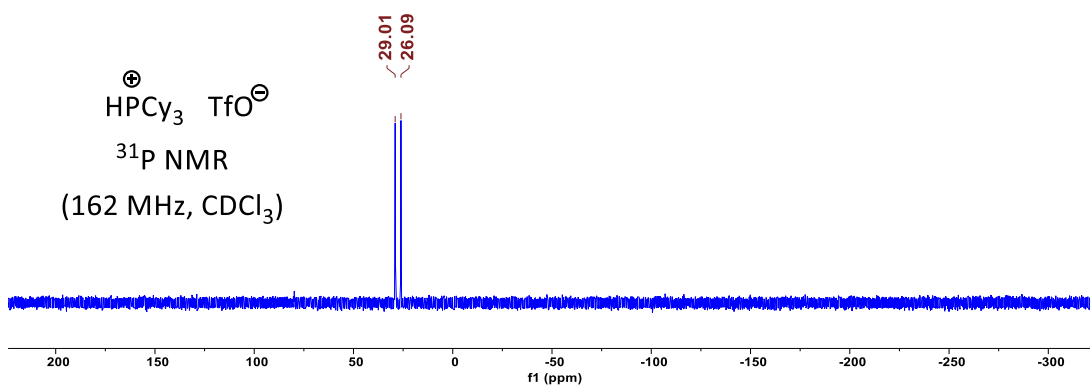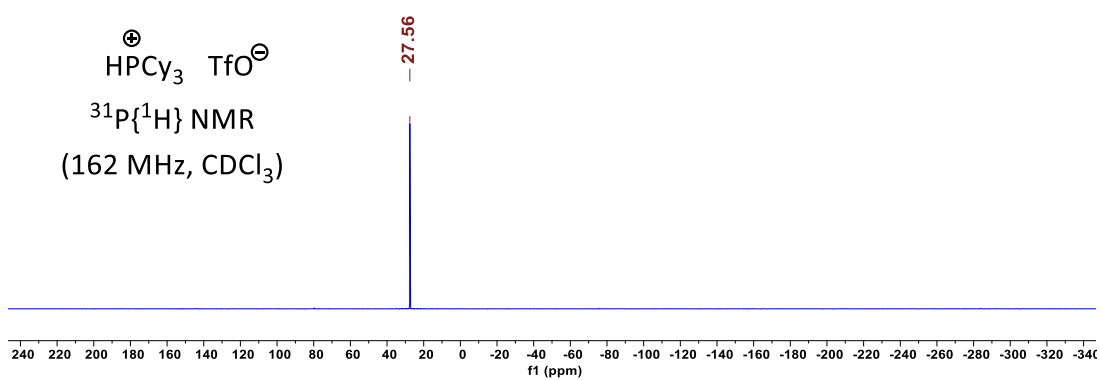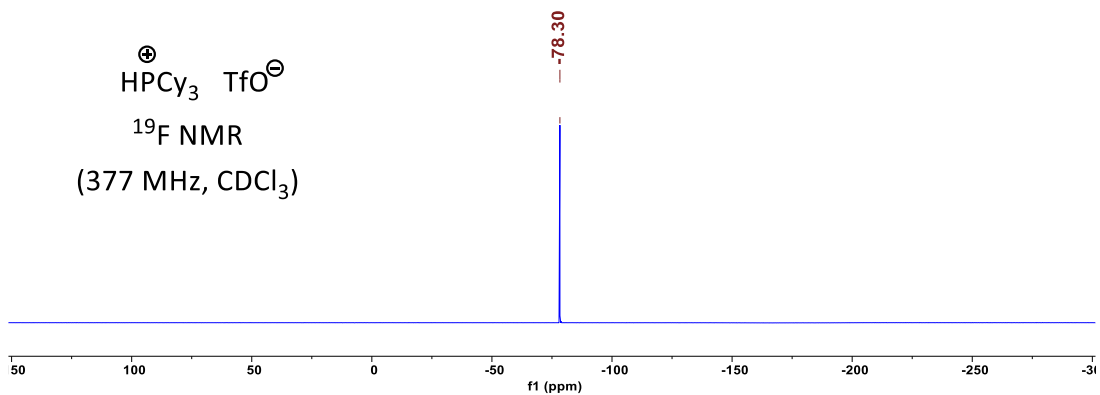

### 2.3.18 Trioctylphosphonium triflate

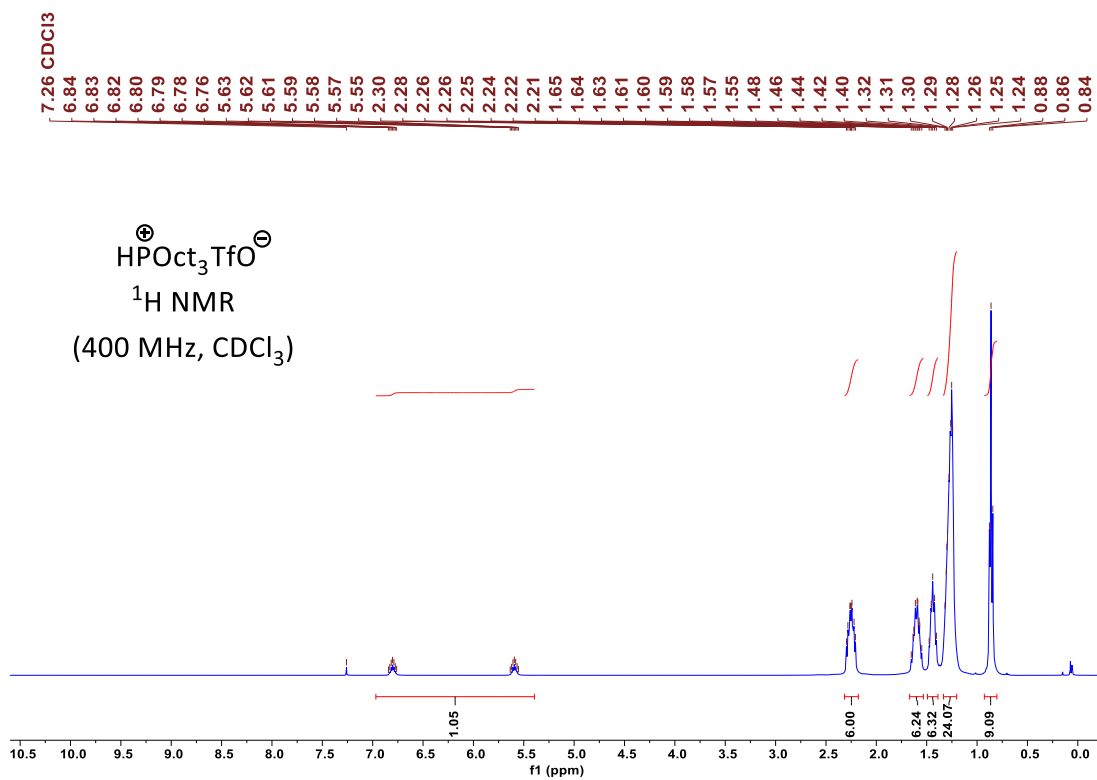

f415

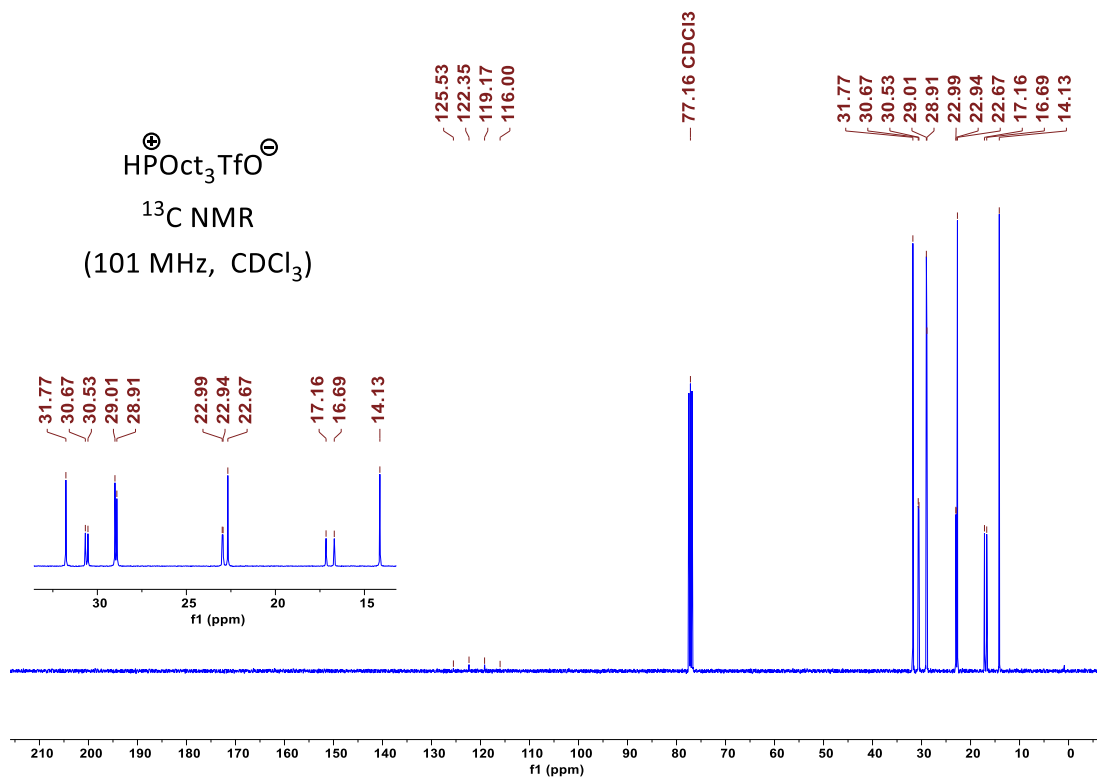

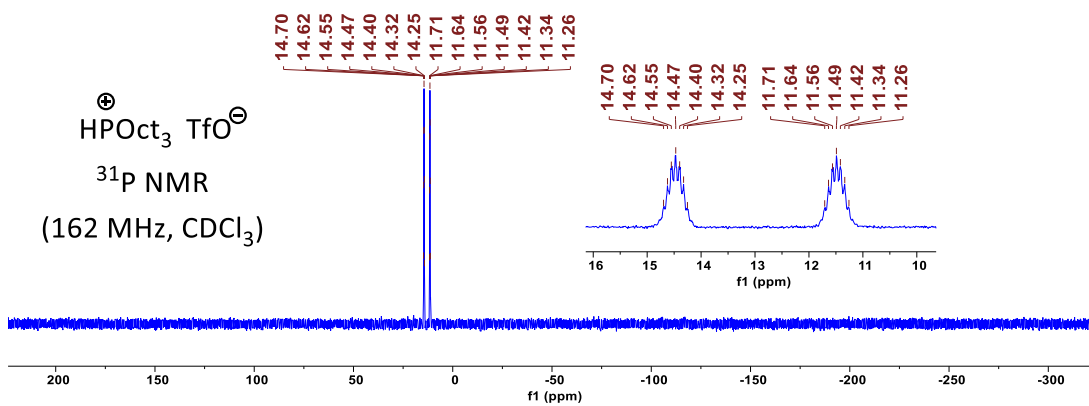



### 2.3.19 Tri(naphthalen-1-yl)phosphane

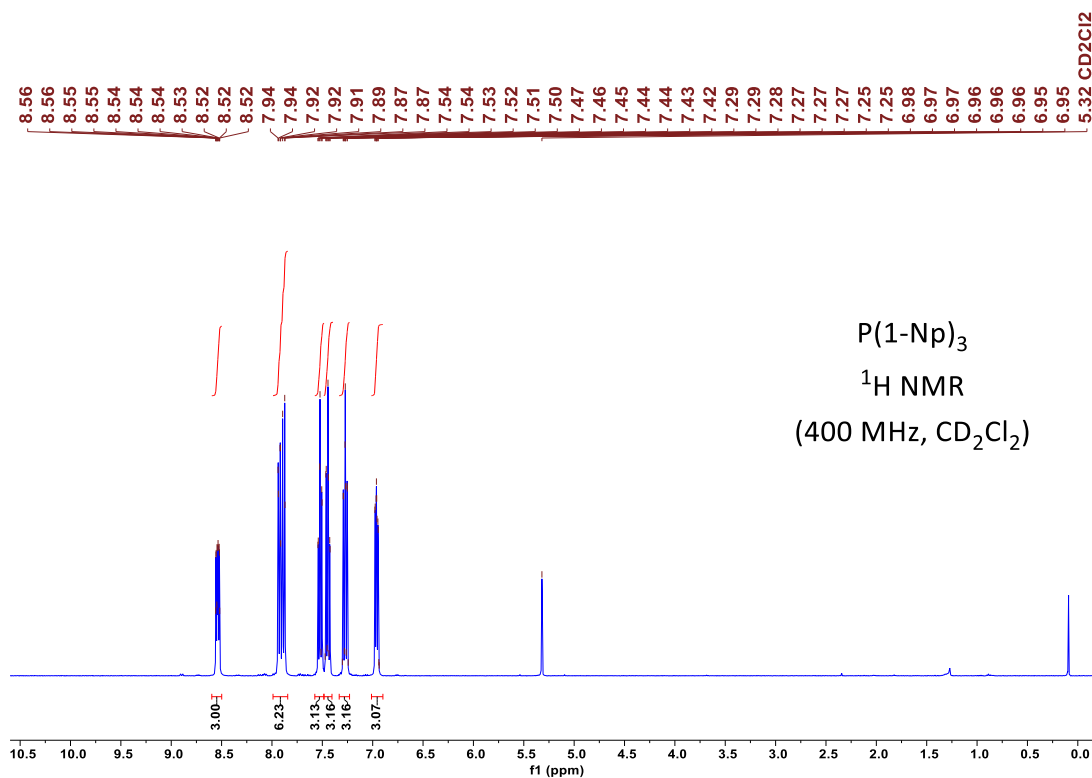

f505

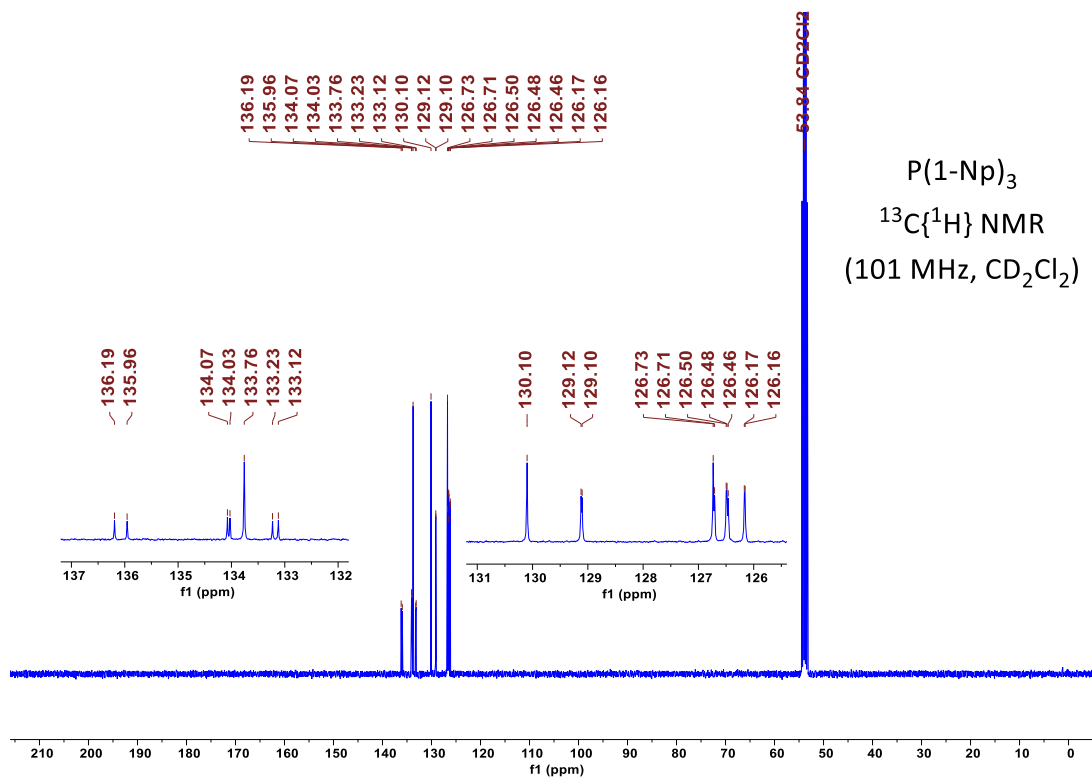

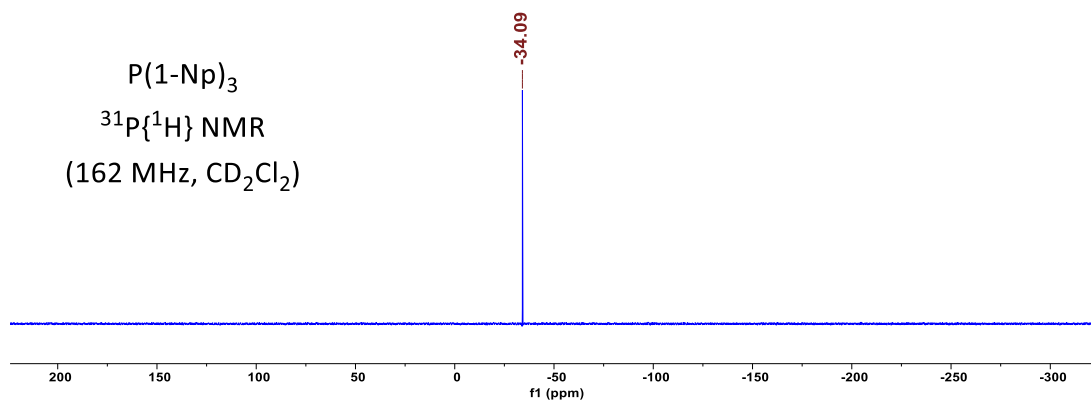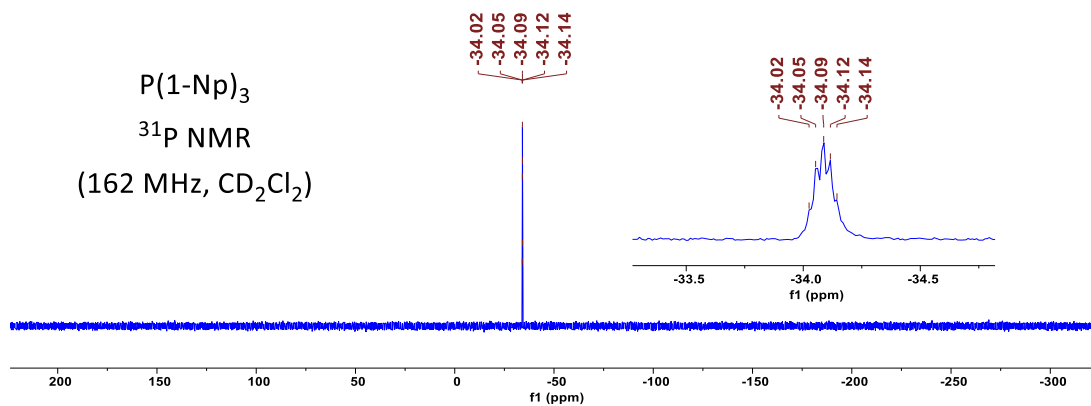

### 2.3.20 Triphenylphosphine oxide

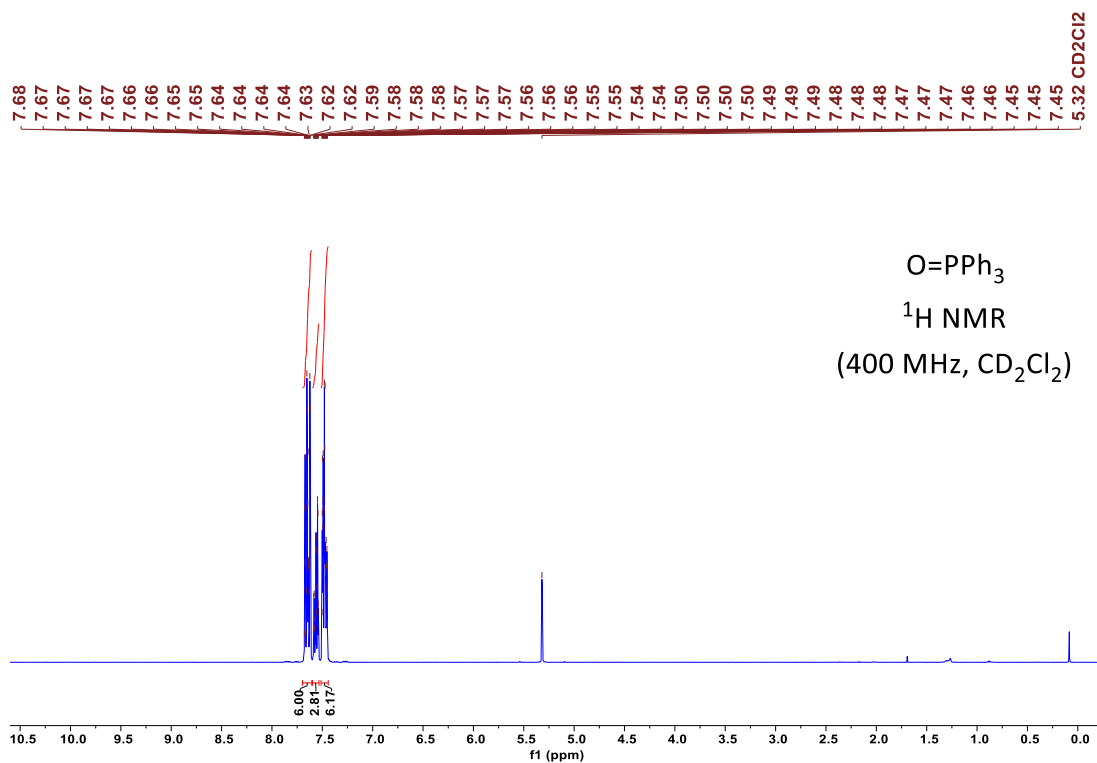

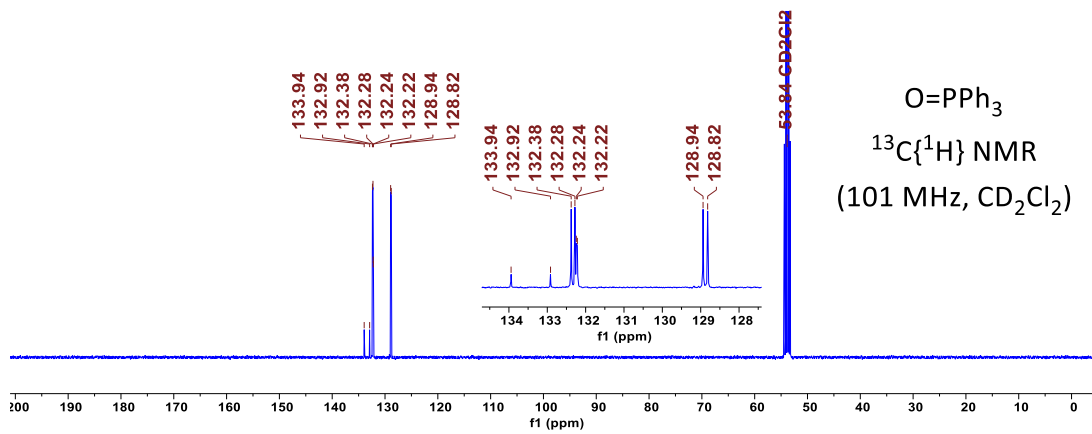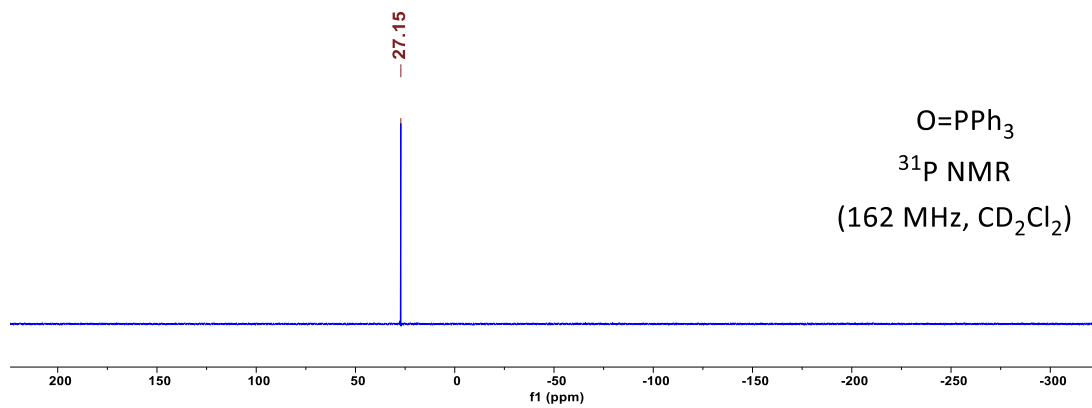

### 2.3.21 Triethylamine

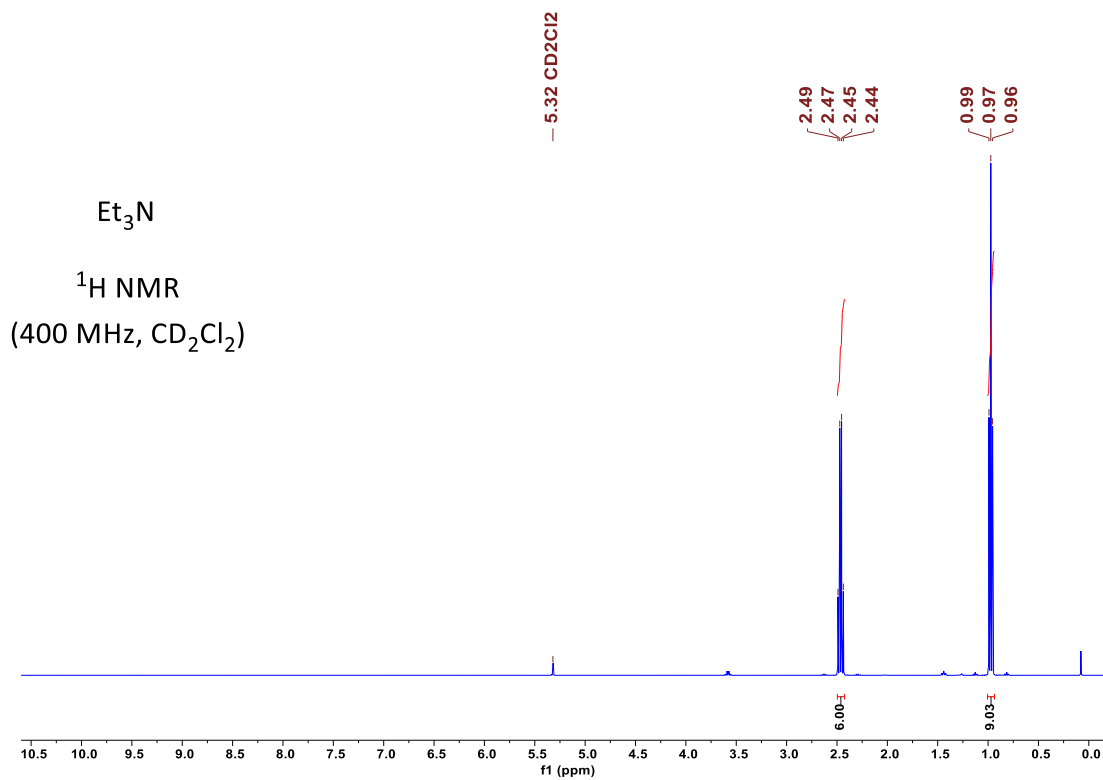

f428

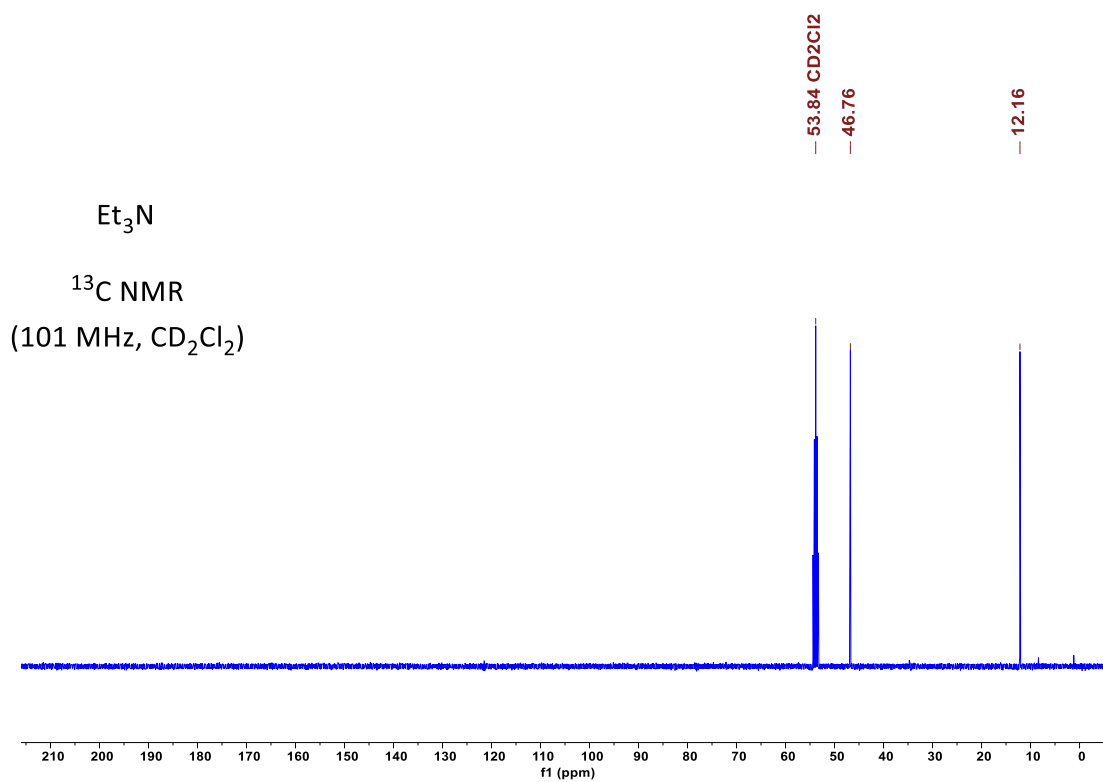

### 2.3.22 Triethylammonium triflate (TEAT)

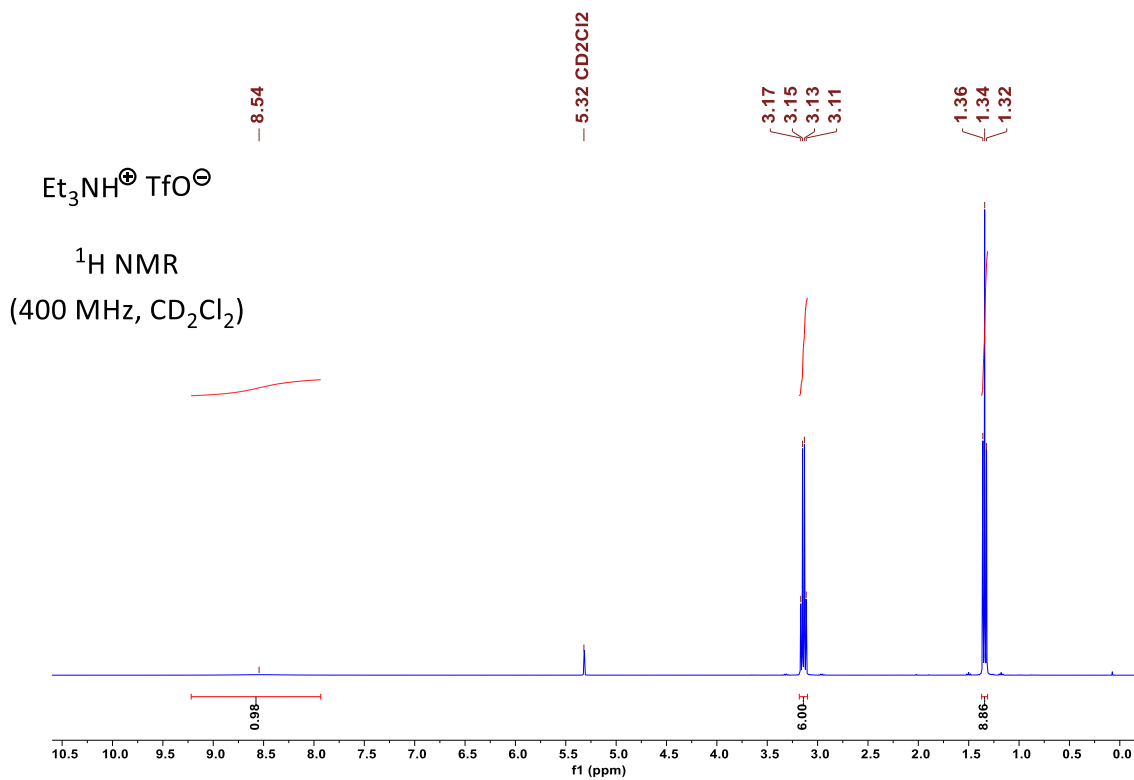

f422

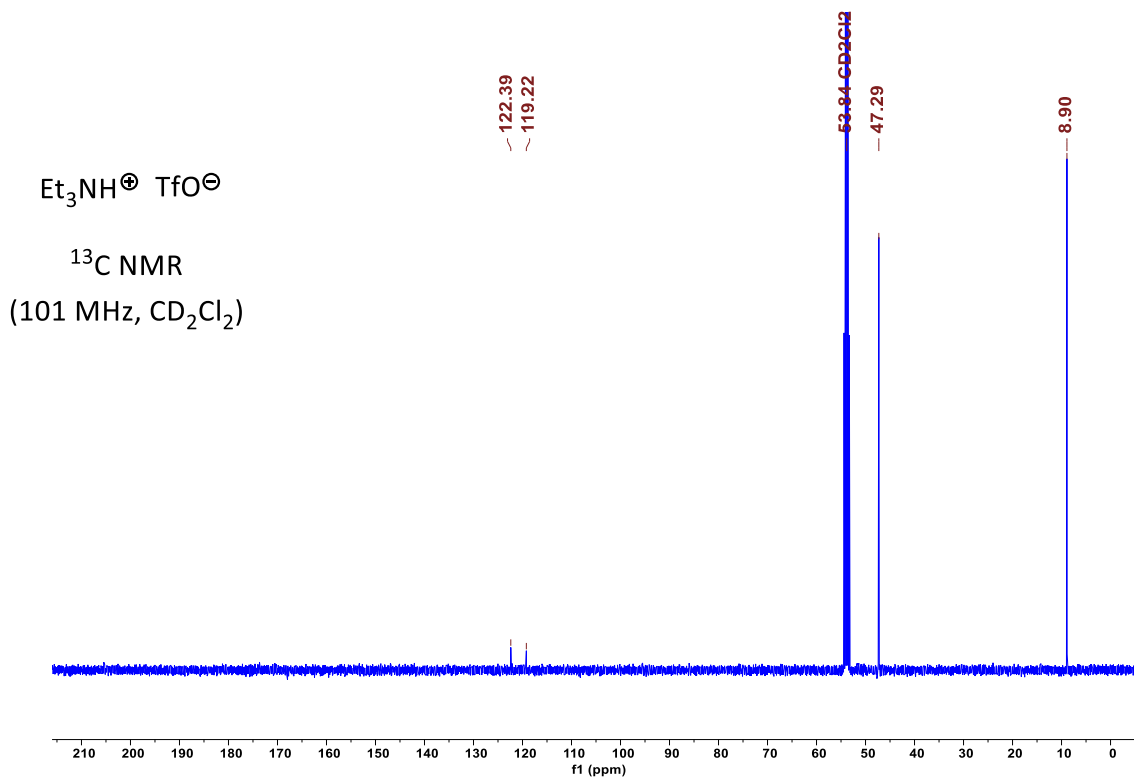

### 2.3.23 2,4,6-Collidinium triflate (CT)

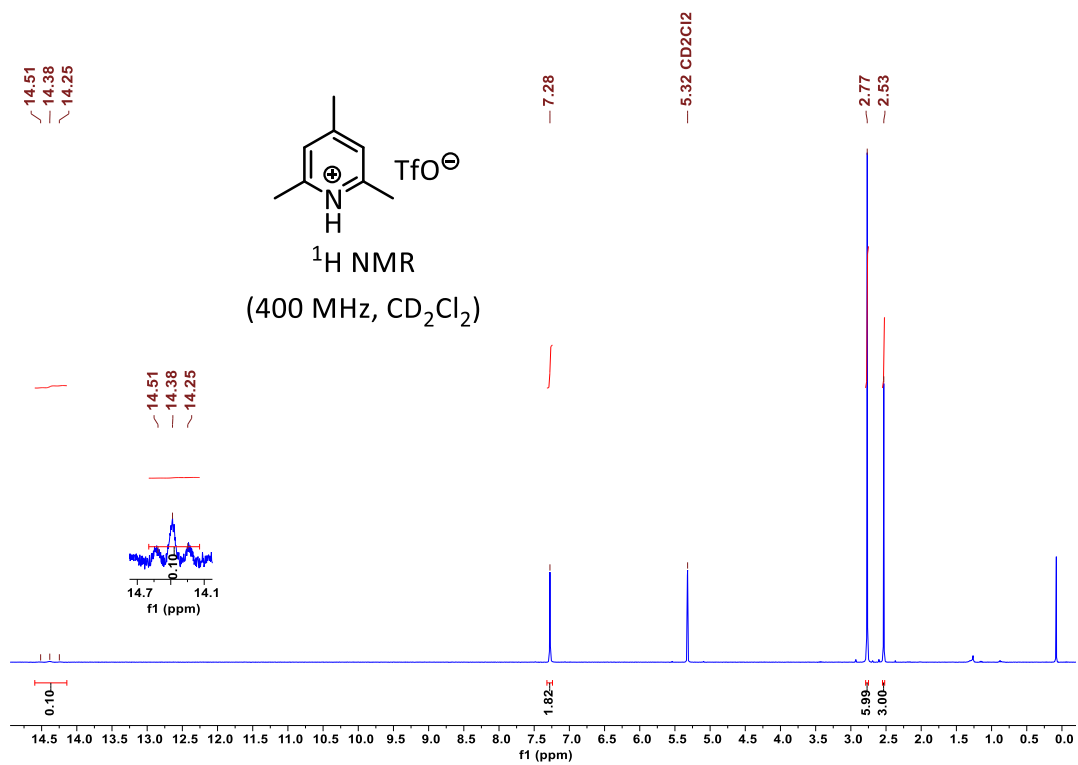

f499

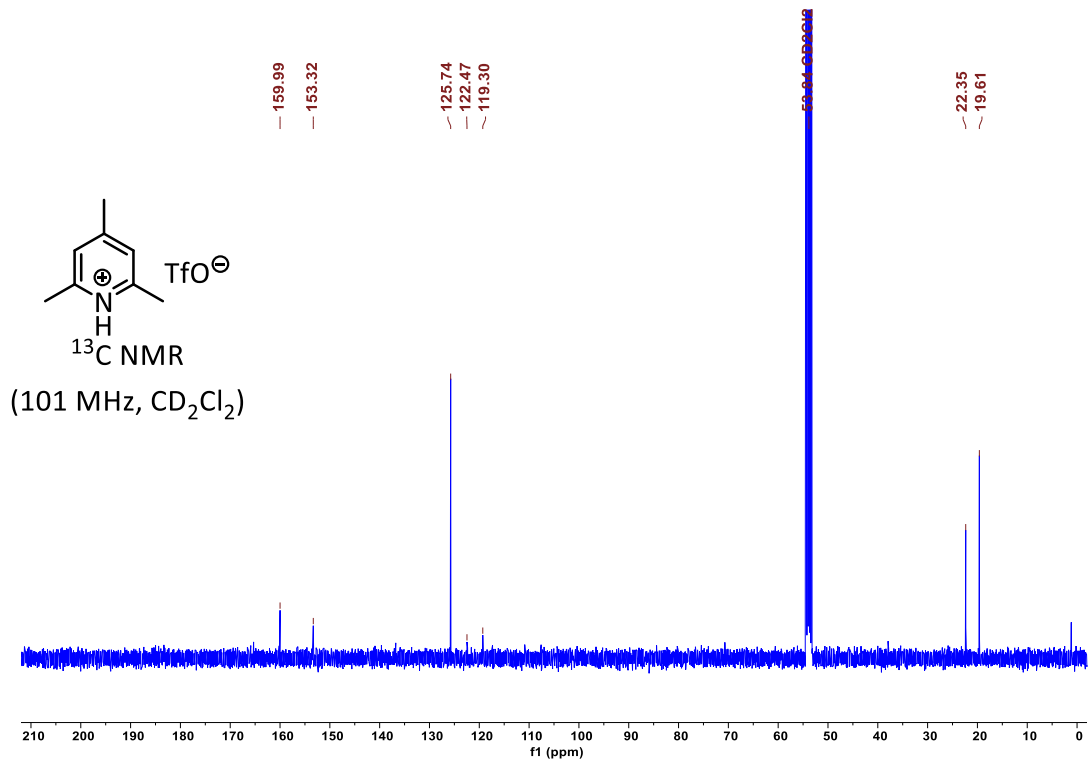

## 2.4 Product Studies

### 2.4.1 Reaction of triphenylphosphonium triflate (TPPT) with ethyl acrylate (**1**)

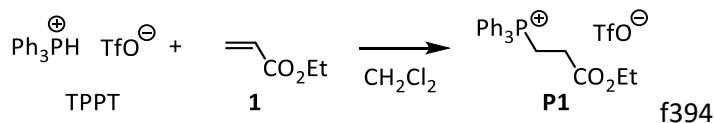

TPPT (200 mg, 0.485 mmol) and **1** (63.4 mg, 0.633 mmol) were mixed in dichloromethane (5 mL). The mixture was kept under inert gas atmosphere at ambient temperature for 5 days. The volatiles were removed by reduced pressure. The residue was washed by diethyl ether and dried under vacuum to provide (3-ethoxy-3-oxopropyl)triphenylphosphonium triflate **P1** as a white solid (247 mg, 99%); mp 121.5–122.8 °C.

**P5**  $^1\text{H NMR}$  (400 MHz,  $\text{CD}_2\text{Cl}_2$ )  $\delta$  7.90–7.85 (m, 3 H), 7.76–7.67 (m, 12 H), 4.02 (q,  $J = 7.1$  Hz, 2 H), 3.59 (dt,  $J = 12.7, 7.5$  Hz, 2 H), 2.78 (dt,  $J = 14.0, 7.5$  Hz, 2 H), 1.16 (t,  $J = 7.2$  Hz, 3 H).  $^{13}\text{C}\{^1\text{H}\}$  NMR (101 MHz,  $\text{CD}_2\text{Cl}_2$ )  $\delta$  170.3 (d,  $J_{\text{C,P}} = 13.2$  Hz,  $\text{C}_\text{q}$ ), 136.0 (d,  $J_{\text{C,P}} = 3.1$  Hz, CH), 133.9 (d,  $J_{\text{C,P}} = 10.0$  Hz, CH), 131.1 (d,  $J_{\text{C,P}} = 12.7$  Hz, CH), 121.4 (q,  $^1J_{\text{C,F}} = 321.2$  Hz,  $\text{CF}_3$ ), 117.6 (d,  $^1J_{\text{C,P}} = 87.0$  Hz,  $\text{C}_\text{q}$ ), 62.3 ( $\text{CH}_2$ ), 27.3 (d,  $^2J_{\text{C,P}} = 2.8$  Hz,  $\text{CH}_2$ ), 18.6 (d,  $^1J_{\text{C,P}} = 55.9$  Hz,  $\text{CH}_2$ ), 14.2 ( $\text{CH}_3$ ).  $^{31}\text{P}\{^1\text{H}\}$  NMR (162 MHz,  $\text{CD}_2\text{Cl}_2$ )  $\delta$  24.2.  $^{19}\text{F NMR}$  (377 MHz,  $\text{CD}_2\text{Cl}_2$ )  $\delta$  -78.9. IR (neat, ATR):  $\tilde{\nu} = 2915, 1730, 1588, 1485, 1441, 1417, 1391, 1375, 1263, 1238, 1225, 1182, 1137, 1110, 1055, 1031, 996, 745, 724, 690 \text{ cm}^{-1}$ . HRMS (ESI):  $m/z$  calcd for  $\text{C}_{23}\text{H}_{24}\text{O}_2\text{P}^+$  ( $\text{M} - \text{TfO}^-$ ): 363.15084, found: 363.15075.

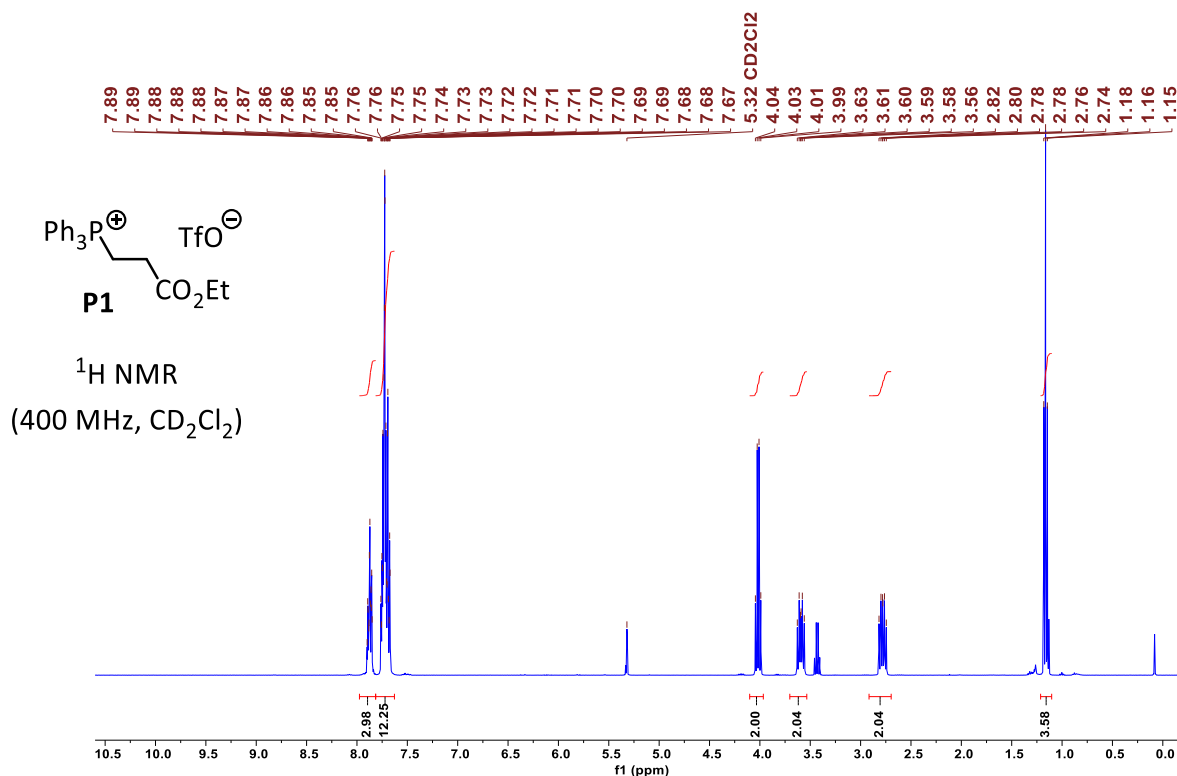

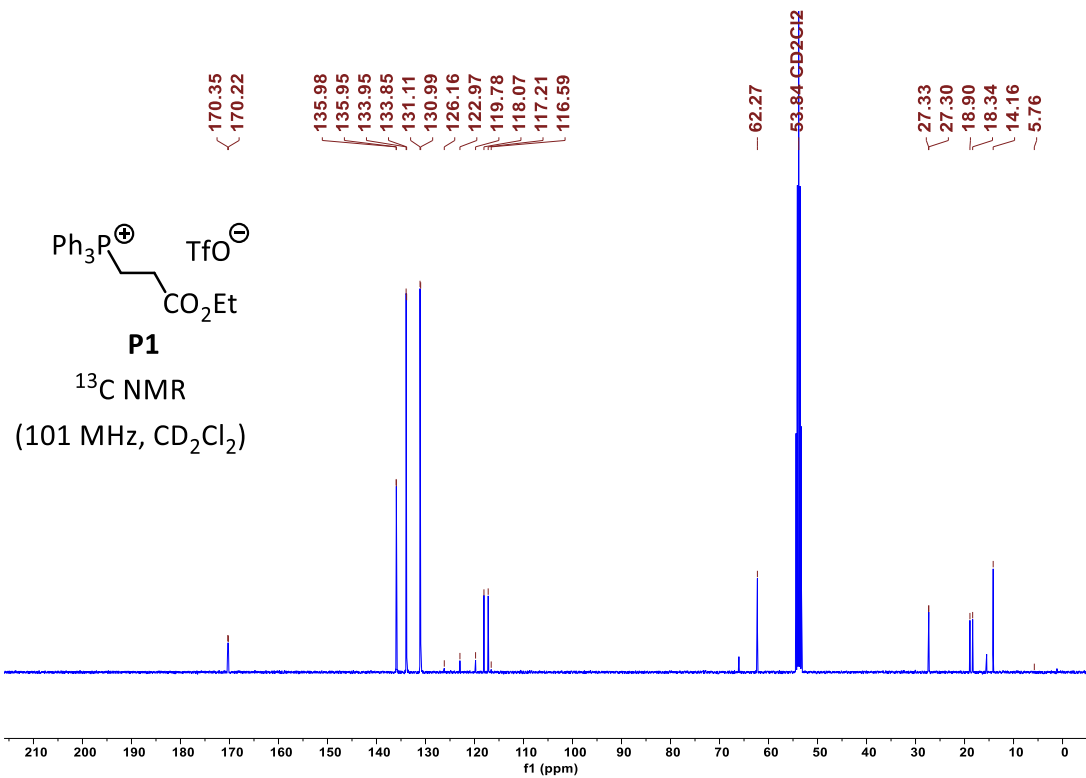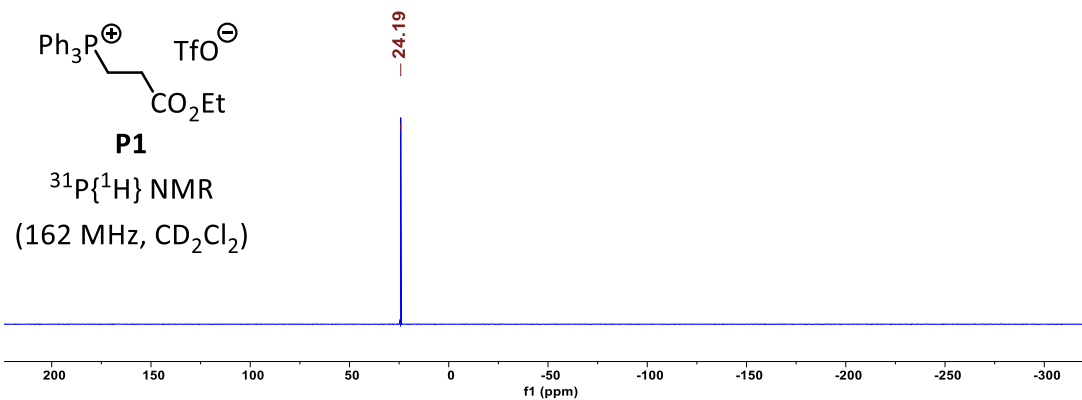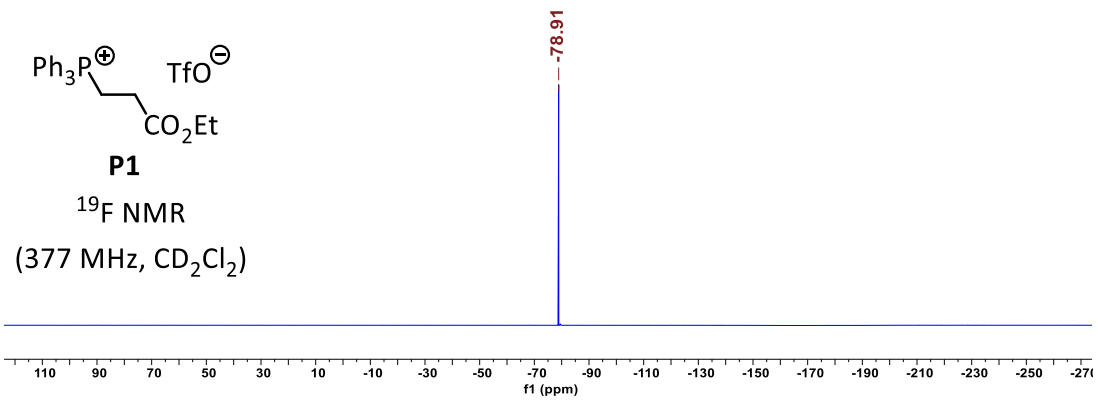



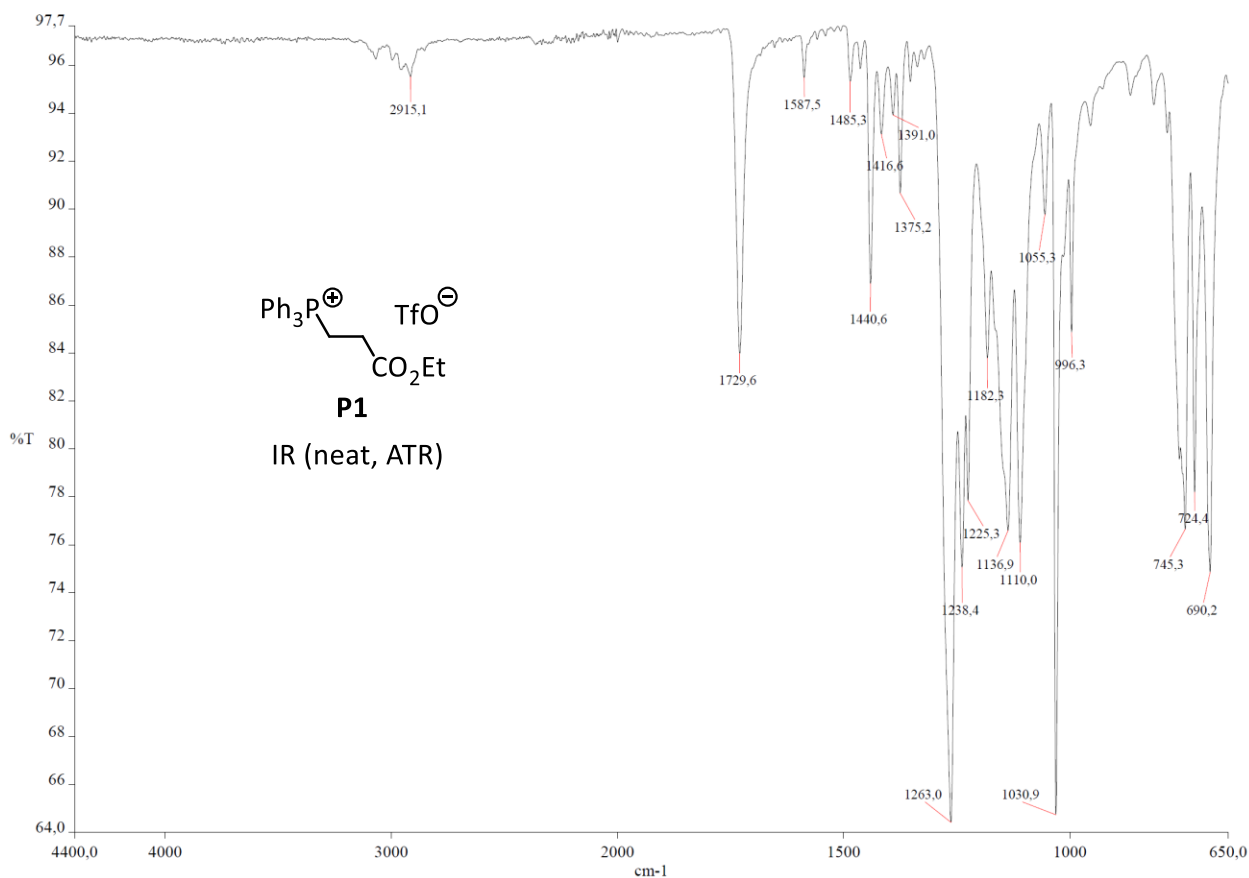

#### 2.4.2 Reaction of triphenylphosphonium triflate (TPPT) with ethyl buta-2,3-dienoate (**2**)

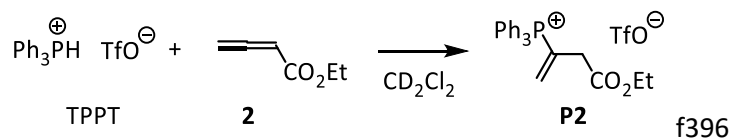

As originally reported in ref S6, TPPT (186 mg, 451 mmol) and **2** (54.5 mg, 486 mmol) were mixed in CD<sub>2</sub>Cl<sub>2</sub> (1.5 mL). The mixture was kept under inert gas atmosphere at ambient temperature for 40 h. The volatiles were removed under reduced pressure. The residue was washed with pentane and dried under high vacuum to provide **P2** (230 mg, 97%) as a white solid; mp 97.3–98.3 °C.<sup>S6</sup>

<sup>1</sup>H NMR (600 MHz, CD<sub>2</sub>Cl<sub>2</sub>) δ 7.92–7.89 (m, 3 H), 7.76–7.68 (m, 12 H), 6.94 (dd, *J*<sub>H,P</sub> = 45.6 Hz, *J*<sub>H,H</sub> = 1.2 Hz, 1 H), 6.29 (dd, *J*<sub>H,P</sub> = 21.0 Hz, *J*<sub>H,H</sub> = 1.2 Hz, 1 H), 3.86 (q, *J*<sub>H,H</sub> = 7.1 Hz, 2 H), 3.56 (dd, *J*<sub>H,P</sub> = 15.4 Hz, *J*<sub>H,H</sub> = 1.1 Hz, 2 H), 1.06 (t, *J*<sub>H,H</sub> = 7.1 Hz, 3 H). <sup>13</sup>C{<sup>1</sup>H} NMR (151 MHz, CD<sub>2</sub>Cl<sub>2</sub>) δ 169.2 (d, <sup>3</sup>*J*<sub>C,P</sub> = 3.1 Hz, C<sub>q</sub>), 145.6–145.5 (m, =CH<sub>2</sub>), 136.1 (d, *J*<sub>C,P</sub> = 3.1 Hz, CH), 134.9 (d, *J*<sub>C,P</sub> = 10.3 Hz, CH), 130.9 (d, *J*<sub>C,P</sub> = 12.9 Hz,

CH), 125.3 (d,  $^1J_{C,P} = 78.1$  Hz, C<sub>q</sub>), 121.4 (q,  $^1J_{C,F} = 321.5$  Hz, CF<sub>3</sub>), 117.1 (d,  $^1J_{C,P} = 88.6$  Hz, C<sub>q</sub>), 62.3 (CH<sub>2</sub>), 39.2 (d,  $^2J_{C,P} = 11.6$  Hz, CH<sub>2</sub>), 14.1 (CH<sub>3</sub>).  $^{31}\text{P}$  NMR (162 MHz, CD<sub>2</sub>Cl<sub>2</sub>)  $\delta$  25.3.<sup>58</sup>  $^{19}\text{F}$  NMR (377 MHz, CD<sub>2</sub>Cl<sub>2</sub>)  $\delta$  -78.9. IR (neat, ATR)  $\tilde{\nu} = 2983, 1732, 1586, 1484, 1441, 1334, 1258, 1223, 1204, 1154, 1107, 1027, 996, 970, 948, 861, 755, 724, 712, 690, 658$  cm<sup>-1</sup>. HRMS (ESI):  $m/z$  calcd for C<sub>24</sub>H<sub>24</sub>O<sub>2</sub>P<sup>+</sup> (M - TfO<sup>-</sup>): 375.15084, found: 375.15072.

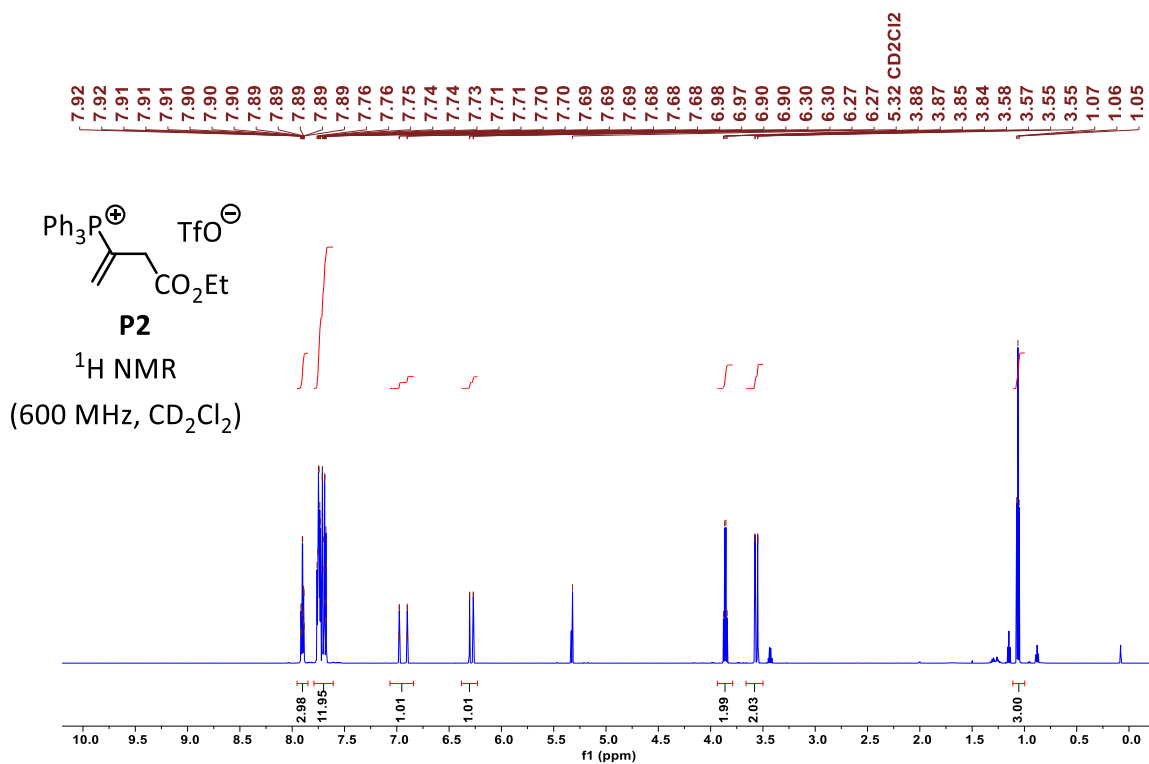

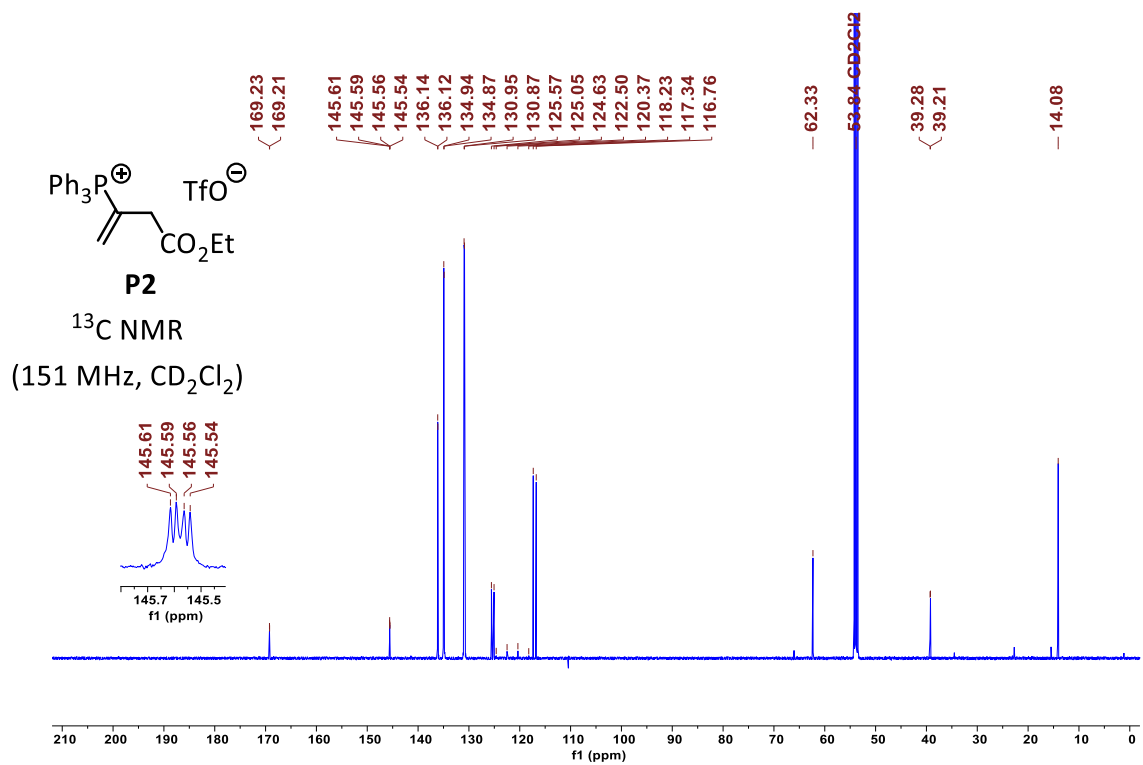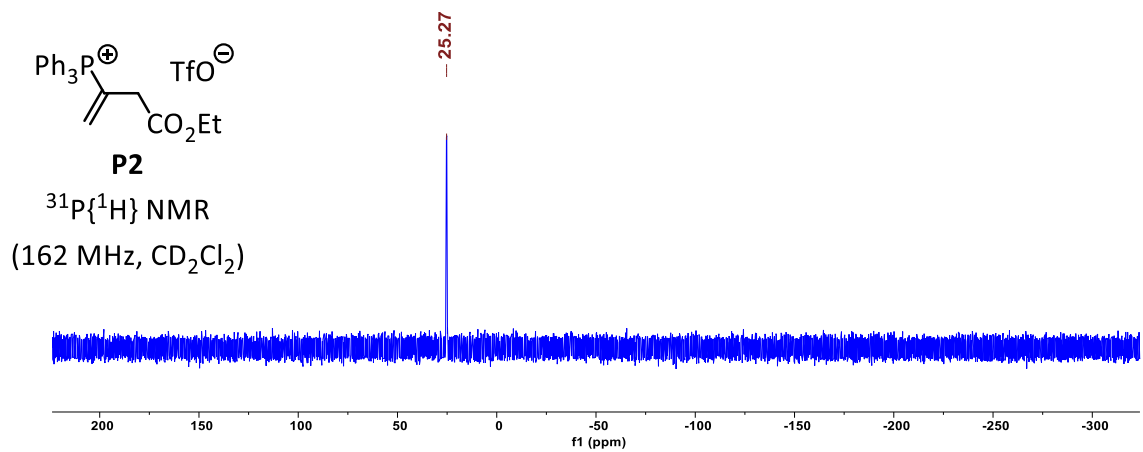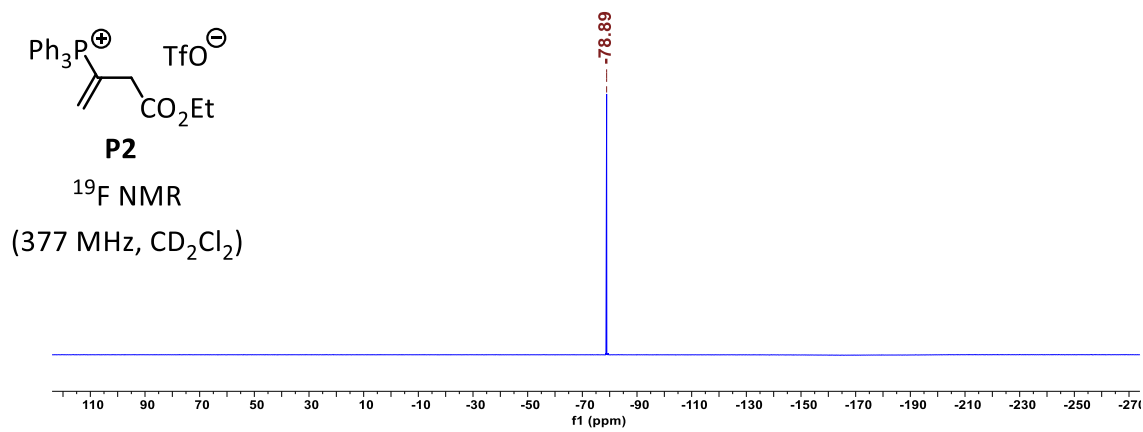

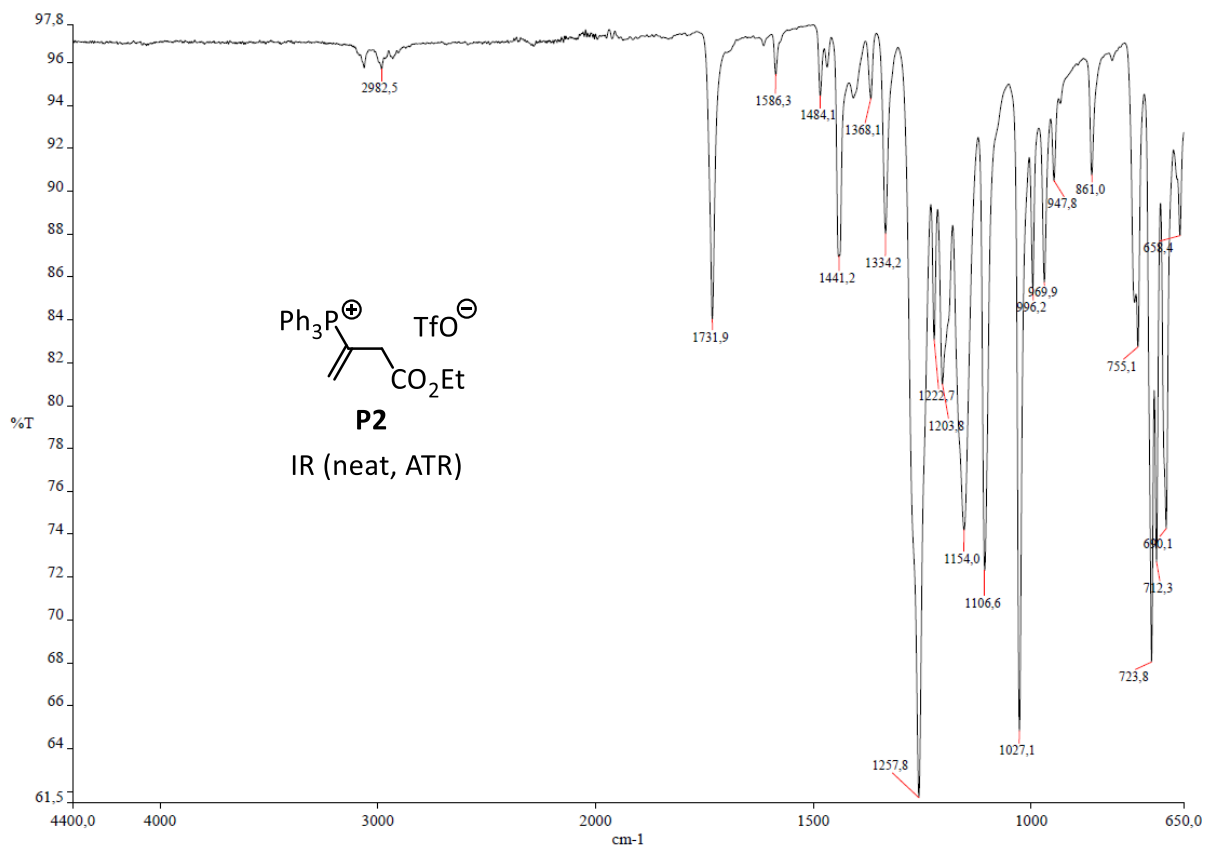

### 2.4.3 Reaction of triphenylphosphonium triflate (TPPT) with ethyl propiolate (**3**)

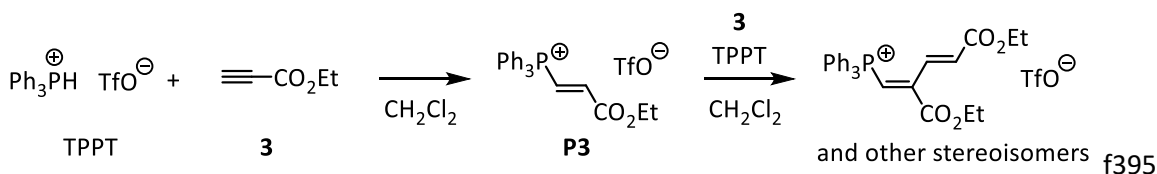

TPPT (205 mg, 0.497 mmol) and **3** (63.0 mg, 0.642 mmol) were mixed in dichloromethane (5 mL). The mixture was kept under inert gas atmosphere at ambient temperature for 7 days. The volatiles were removed under reduced pressure. The residue was washed by diethyl ether and dried under vacuum to provide a white solid, which consists of **P3** (approx. .50 wt%) and 2:1 products (mixture of stereoisomers).

<sup>1</sup>H NMR (400 MHz, CD<sub>2</sub>Cl<sub>2</sub>) δ 7.97–7.59 (m, 16 H), 6.63 (dd, *J* = 19.8, 16.8 Hz, 1 H), 4.34 (q, *J* = 7.1 Hz, 2 H), 1.34 (t, *J* = 7.1 Hz, 3 H). <sup>13</sup>C NMR (101 MHz, CD<sub>2</sub>Cl<sub>2</sub>) δ 162.7, 146.1 (d, *J* = 4.4 Hz), 136.7 (d, *J* = 3.1 Hz), 134.4 (d, *J* = 10.8 Hz), 131.4 (d, *J* = 13.3 Hz), 124.4 (d, *J* = 83.8 Hz), 121.3 (q, <sup>1</sup>*J*<sub>C,F</sub> = 321.1 Hz, CF<sub>3</sub>), 116.1 (d, *J* = 91.4 Hz), 63.3, 14.2. <sup>31</sup>P NMR (162 MHz, CD<sub>2</sub>Cl<sub>2</sub>) δ 19.2 (m). HRMS (ESI): *m/z* calcd for C<sub>23</sub>H<sub>22</sub>O<sub>2</sub>P<sup>+</sup> (M – TfO<sup>−</sup>): 361.13519, found: 361.13553; *m/z* calcd for the 2:1-product C<sub>28</sub>H<sub>28</sub>O<sub>4</sub>P<sup>+</sup> (M – TfO<sup>−</sup>): 459.17197, found: 459.17234.

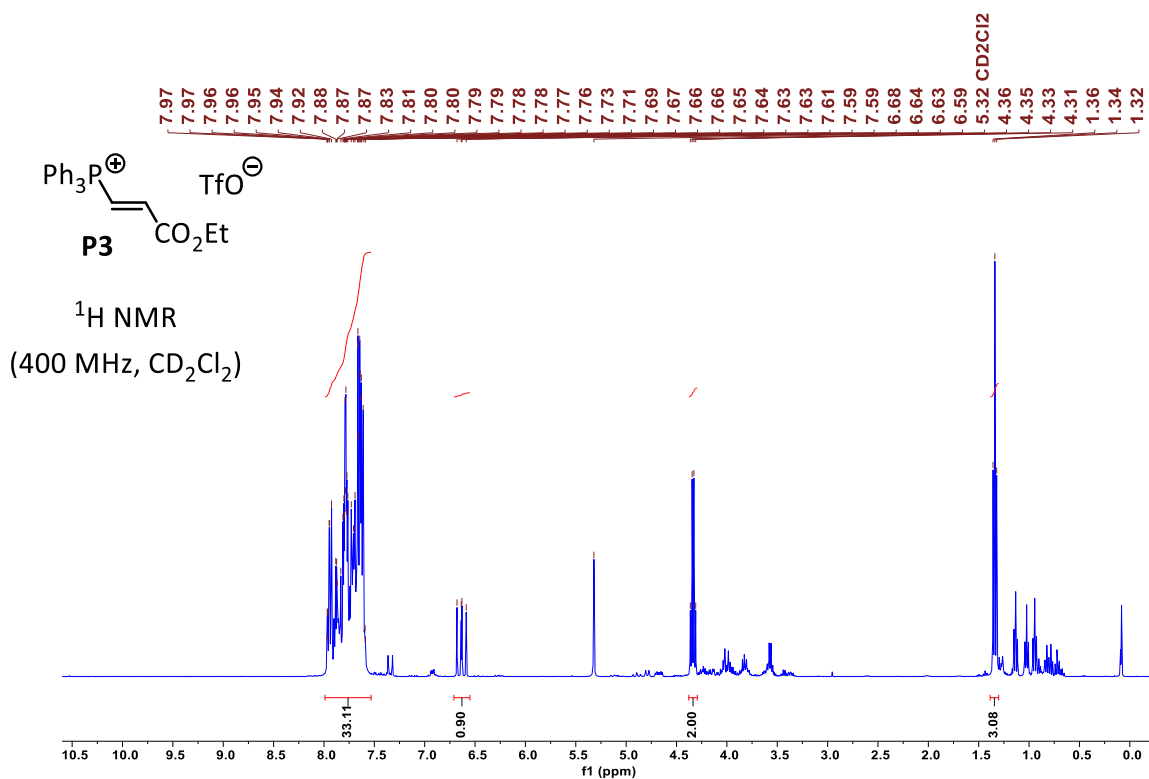

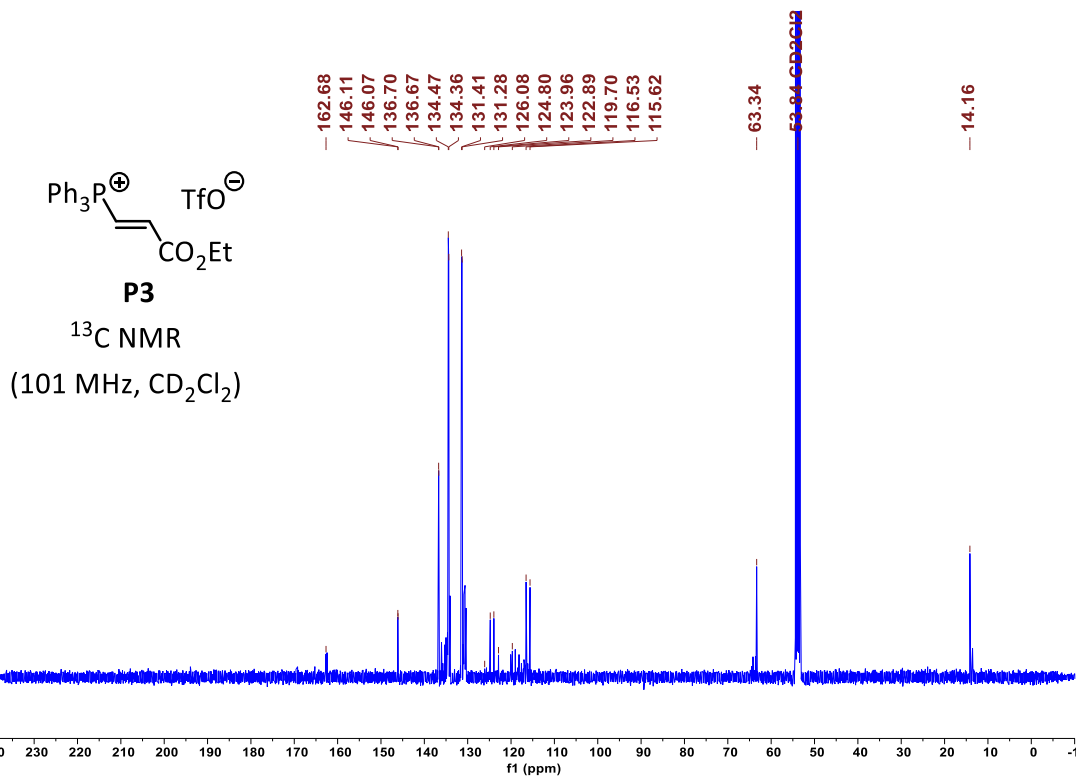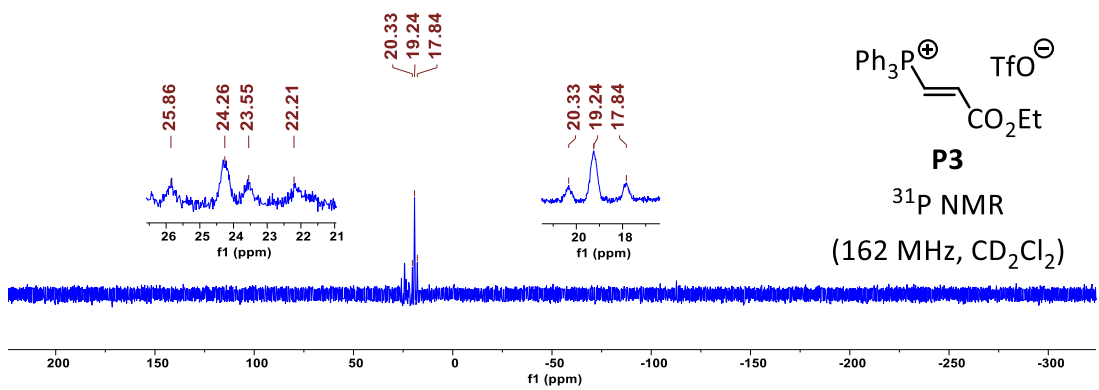

Probenname: C:\Data\09-feanch-f395  
Auftraggeber: An. Offial  
RT: 0.00 - 5.02

Probe: 361, g23h22o2p, fest, Chloroform  
Methode: 100 ul/min Acetonitril/Wasser, FIA/ESI, LTQ FT, Spahl

Inj Vol: 1.000000  
Zeit:

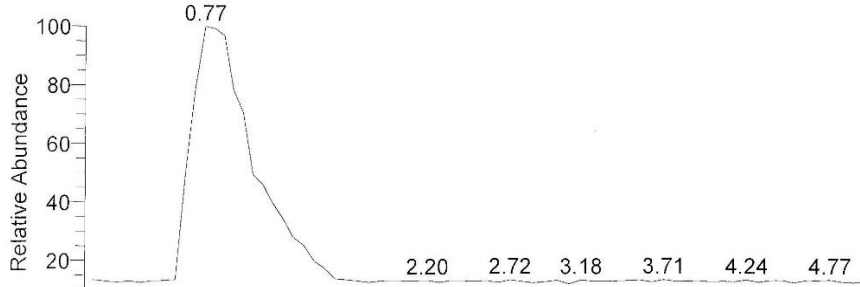

NL:  
2.09E5  
Base Peak F:  
FTMS - p ESI Full  
ms  
[100.00-1000.00]  
MS  
09-feanch-f395

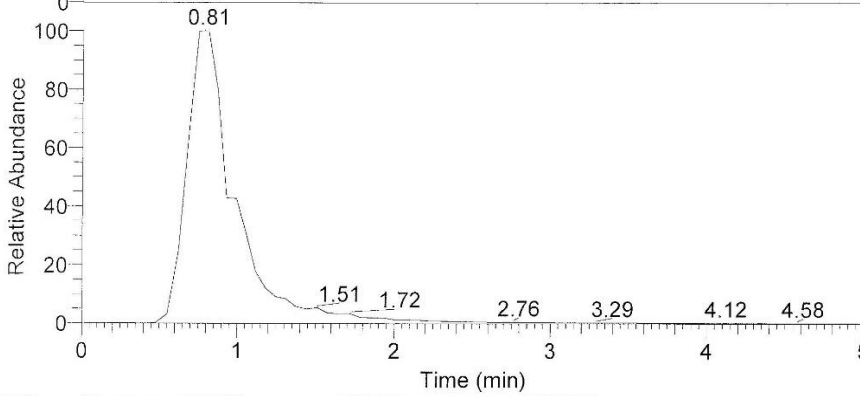

NL:  
2.09E7  
Base Peak F:  
FTMS + p ESI  
Full ms  
[100.00-1000.00]  
MS  
09-feanch-f395

09-feanch-f395 #52-232 RT: 0.55-1.93 AV: 22 NL: 4.92E6  
F: FTMS + p ESI Full ms [100.00-1000.00]

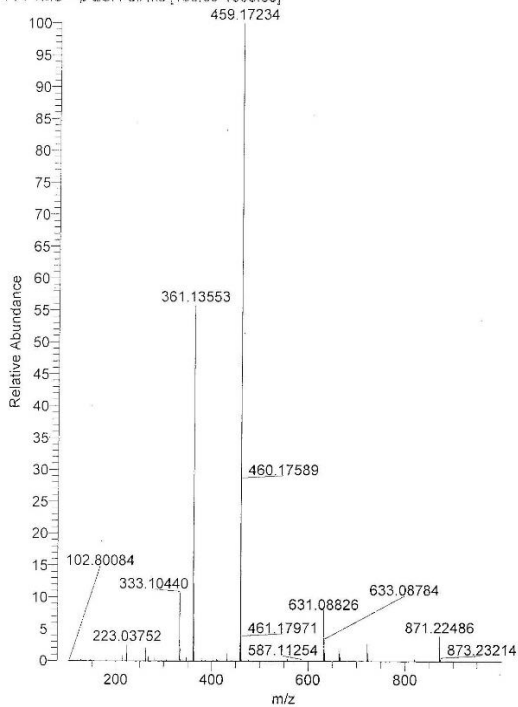

09-feanch-f395 #52-229 RT: 0.51-1.97 AV: 23 NL: 7.79E4  
F: FTMS - p ESI Full ms [100.00-1000.00]

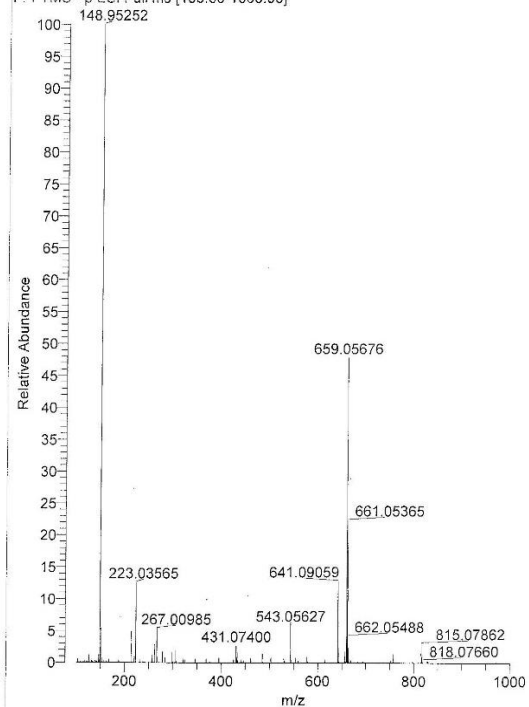

#### 2.4.4 Reaction of triphenylphosphonium triflate with ethenesulfonyl fluoride (4)

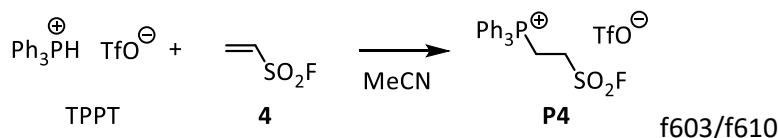

TPPT (37.4 mg, 0.0907 mmol) and **4** (17.8 mg, 0.162 mmol) were mixed in acetonitrile (1.0 mL). The reaction mixture was kept under inert gas atmosphere at ambient temperature for 1 day. Then, the volatiles were removed under reduced pressure. The residue was washed with pentane and dried under vacuum to provide **P4** as a white solid (46.9 mg, 99%).

**<sup>1</sup>H NMR** (800 MHz, CD<sub>2</sub>Cl<sub>2</sub>) δ 7.93–7.91 (m, 3 H), 7.79–7.72 (m, 12 H), 3.98–3.88 (m, 4 H). **<sup>13</sup>C NMR** (101 MHz, CD<sub>2</sub>Cl<sub>2</sub>) δ 136.5 (d, *J*<sub>C,P</sub> = 3.1 Hz, CH), 134.1 (d, *J*<sub>C,P</sub> = 10.4 Hz, CH), 131.4 (d, *J*<sub>C,P</sub> = 13.1 Hz, CH), 116.2 (d, *J*<sub>C,P</sub> = 87.8 Hz, C<sub>q</sub>), 44.4 (d, *J*<sub>C,P</sub> = 20.7 Hz, CH<sub>2</sub>), 18.9 (d, *J*<sub>C,P</sub> = 55.6 Hz, CH<sub>2</sub>; the <sup>13</sup>C resonance of the CF<sub>3</sub> group could not be detected). **<sup>31</sup>P{<sup>1</sup>H} NMR** (162 MHz, CD<sub>2</sub>Cl<sub>2</sub>) δ 23.5. **<sup>19</sup>F NMR** (377 MHz, CD<sub>2</sub>Cl<sub>2</sub>) δ 54.2 (m, 1 F, SO<sub>2</sub>F), –78.9 (s, 3 F, CF<sub>3</sub>). **IR** (neat, ATR)  $\tilde{\nu}$  = 3065, 2926, 1589, 1486, 1440, 1414, 1259, 1225, 1199, 1155, 1113, 1030, 998, 784, 741, 690 cm<sup>-1</sup>. **HRMS** (ESI): *m/z* calcd for C<sub>20</sub>H<sub>19</sub>FO<sub>2</sub>PS<sup>+</sup> (M – TfO<sup>-</sup>): 373.08219, found: 373.08217.

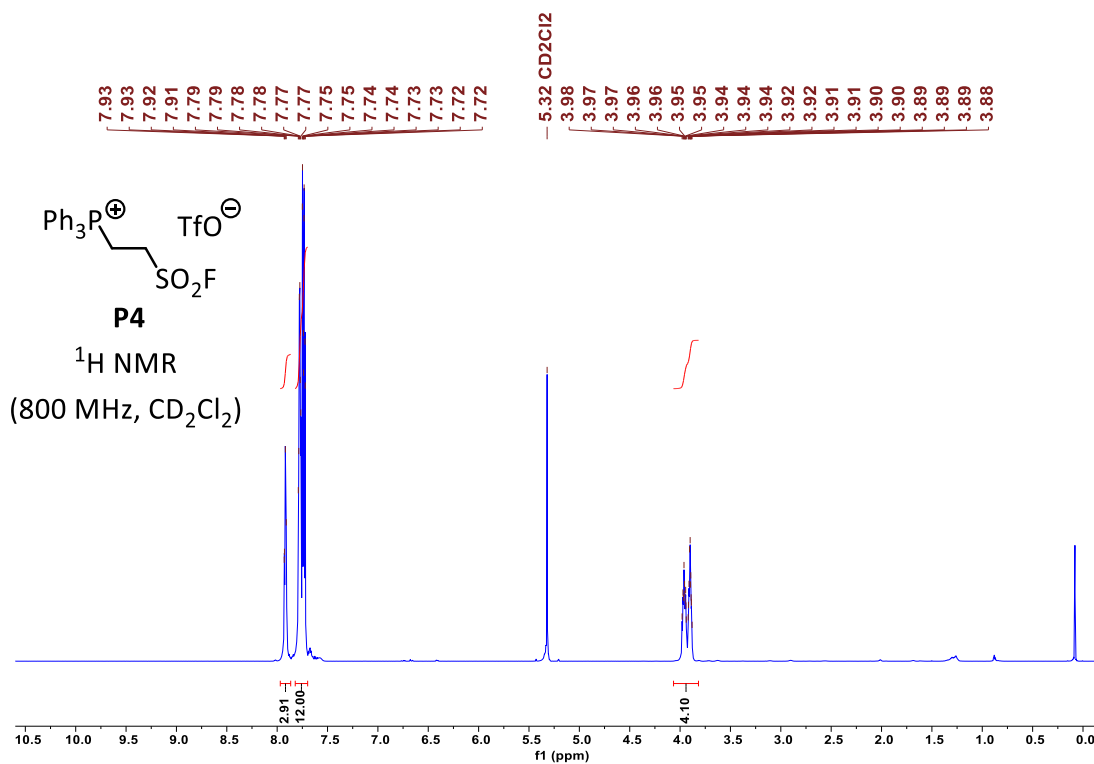



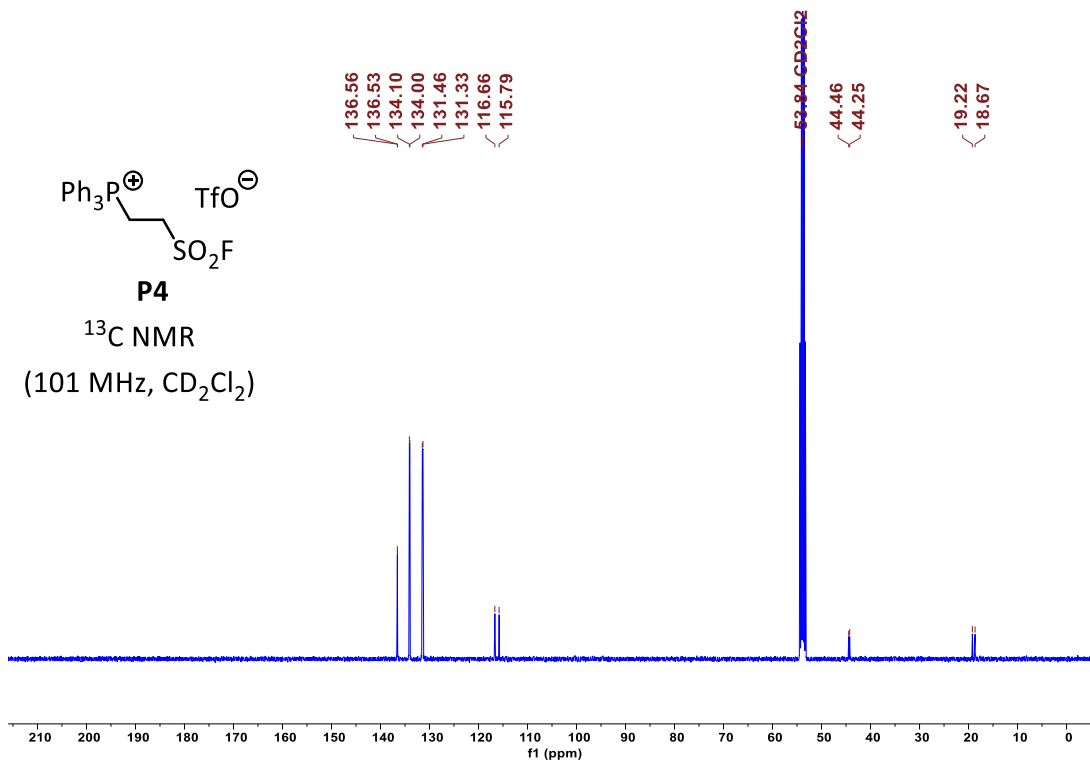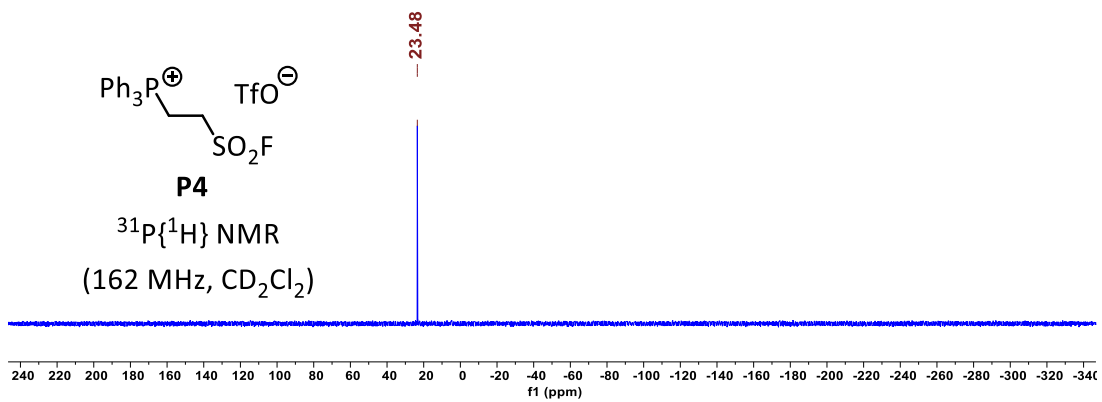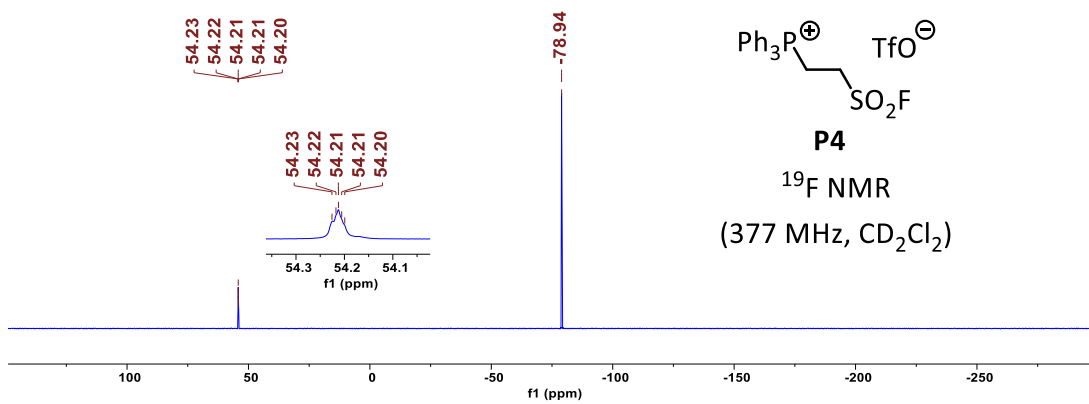

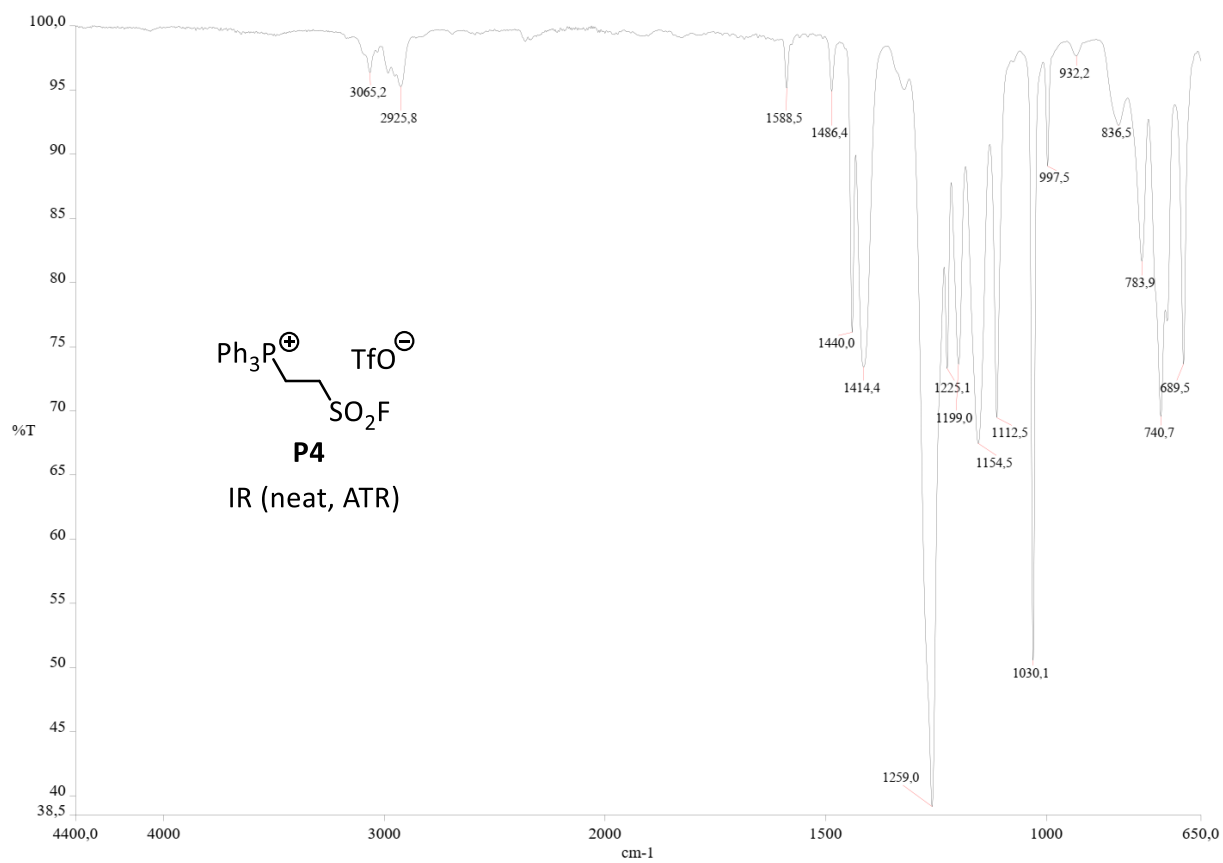

Probenname: C:\Data\12-feanch-f603  
Auftraggeber: An, Offial

Probe: 522, c21h19f4o5ps2, fest, Aceton  
Methode: 100 ul/min Acetonitril/Wasser, FIA/ESI, LTQ FT, Spahl

Inj Vol: 1.00000  
Zeit:

RT: 0.00 - 5.00

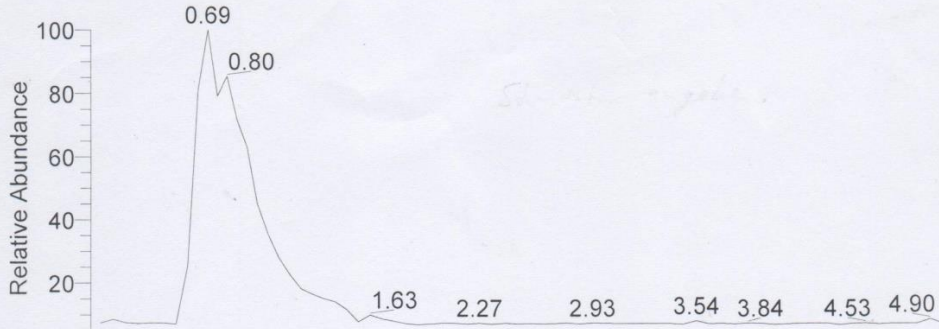

NL:  
2.39E5  
Base Peak F:  
FTMS - p ESI Full  
ms  
[100.00-1000.00]  
MS  
12-feanch-f603

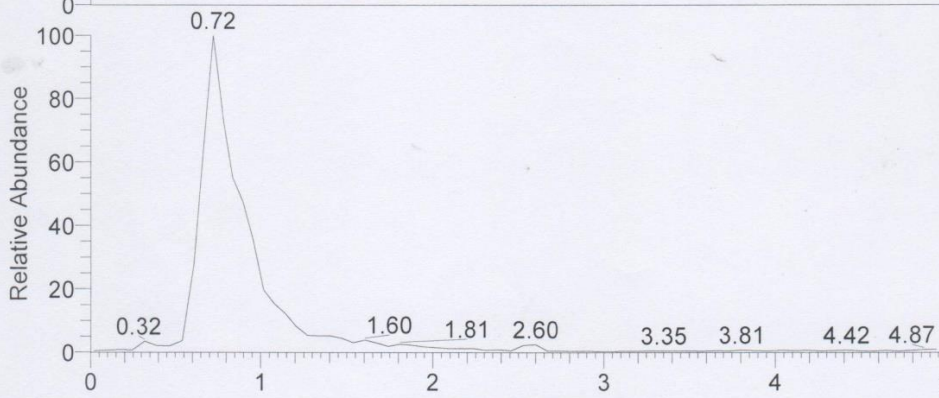

NL:  
2.54E7  
Base Peak F:  
FTMS + p ESI  
Full ms  
[100.00-1000.00]  
MS  
12-feanch-f603

12-feanch-f603 #53-238 RT: 0.54-1.95 AV: 23 NL: 5.56E6  
F: FTMS + p ESI Full ms [100.00-1000.00]

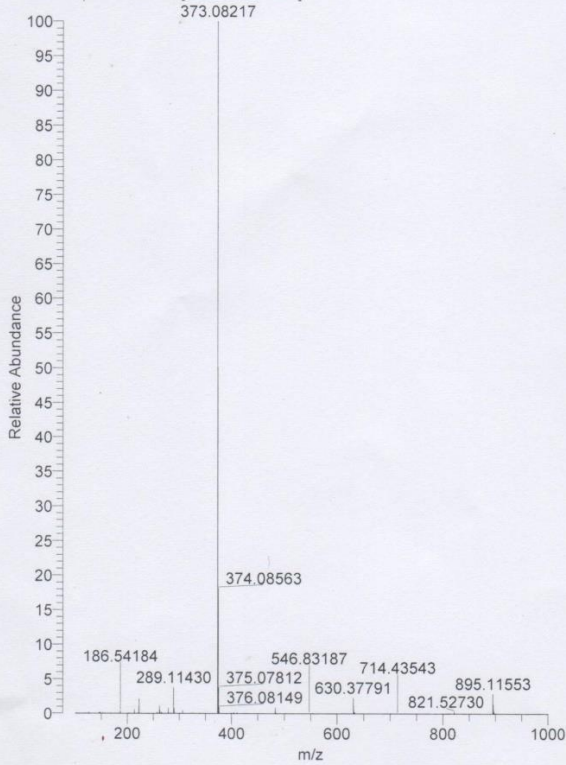

12-feanch-f603 #53-236 RT: 0.50-1.91 AV: 23 NL: 7.45E4  
F: FTMS - p ESI Full ms [100.00-1000.00]

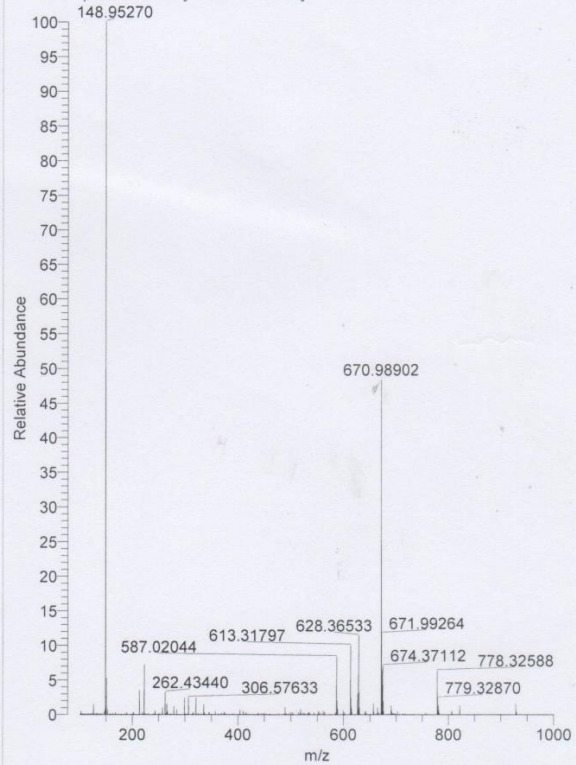

### 3 Studies on the Interactions Between Electrophiles, Nucleophiles and Proton Sources in CD<sub>2</sub>Cl<sub>2</sub>

#### 3.1 Brønsted Basicity of PMe<sub>2</sub>Ph and PMePh<sub>2</sub> vs 2,4,6-Collidine

##### 3.1.1 PMePh<sub>2</sub> and 2,4,6-collidinium triflate (CT)

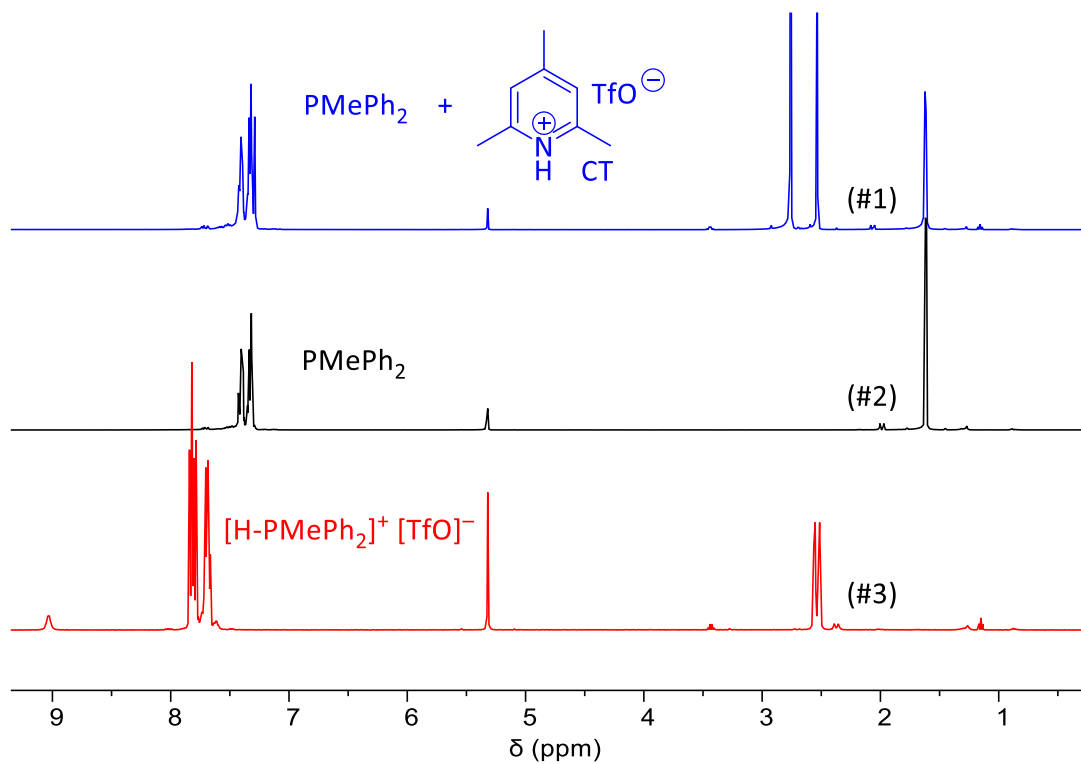

**Fig. S3.** Comparison of the <sup>1</sup>H NMR spectra (400 MHz, CD<sub>2</sub>Cl<sub>2</sub>) of PMePh<sub>2</sub> (#2) and [H-PMePh<sub>2</sub>]<sup>+</sup> [TfO]<sup>-</sup> (#3) with that of a mixture of PMePh<sub>2</sub> and CT (#1).

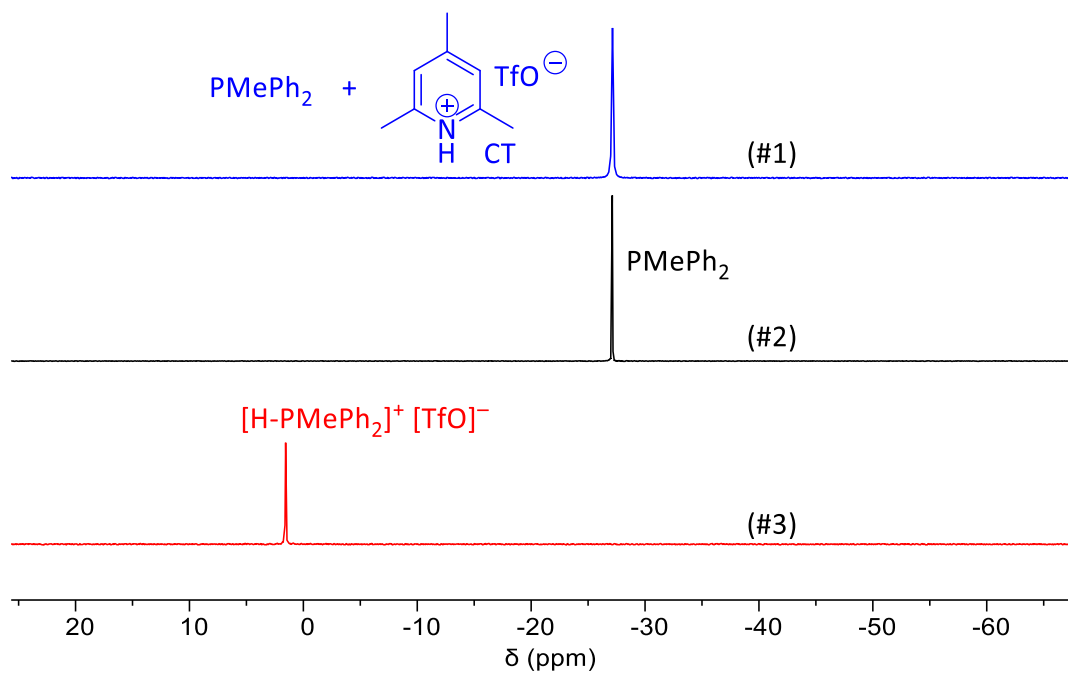

**Fig. S4.** Comparison of the  $^{31}\text{P}$  NMR spectra (162 MHz,  $\text{CD}_2\text{Cl}_2$ ) of  $\text{PMePh}_2$  (#2) and  $[\text{H-PMePh}_2]^+ [\text{TfO}]^-$  (#3) with that of a mixture of  $\text{PMePh}_2$  and CT (#1).

### 3.1.2 $\text{PMe}_2\text{Ph}$ and 2,4,6-collidinium triflate (CT)

Figures S5 and S6 indicate that  $\text{PMe}_2\text{Ph}$  is not protonated by CT in dichloromethane.

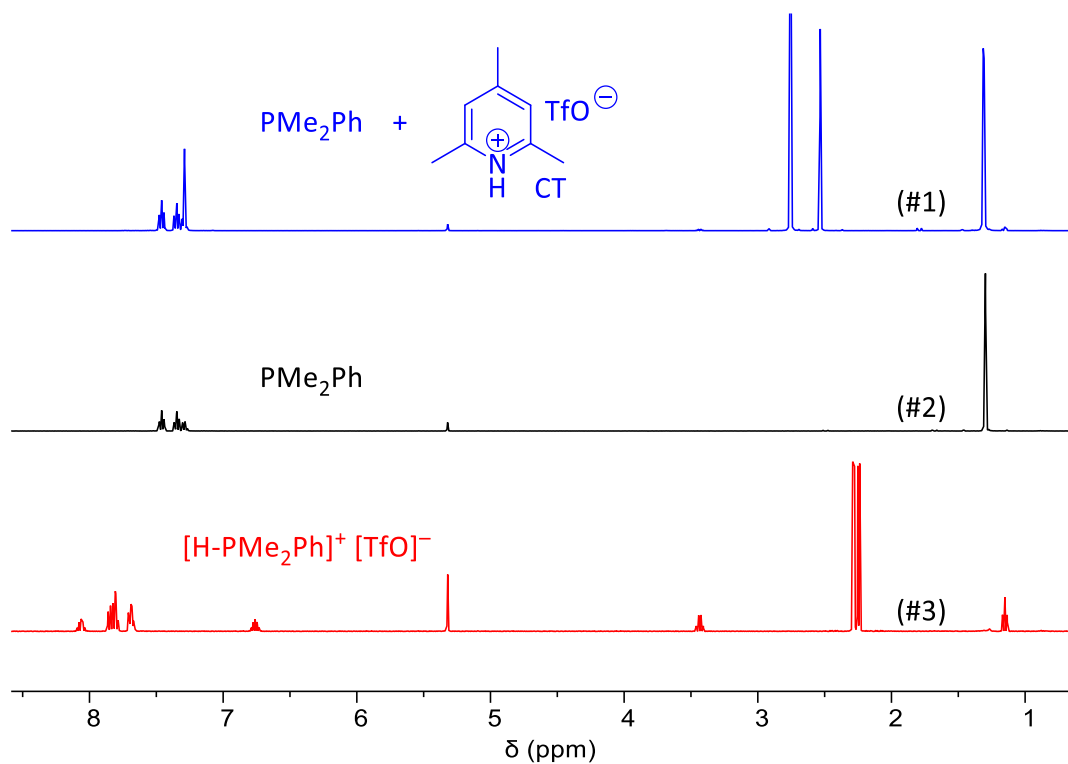

**Fig. S5.** Comparison of the  $^1\text{H}$  NMR spectra (400 MHz,  $\text{CD}_2\text{Cl}_2$ ) of  $\text{PMe}_2\text{Ph}$  (#2) and  $[\text{H-PMe}_2\text{Ph}]^+ [\text{TfO}]^-$  (#3) with that of a mixture of  $\text{PMe}_2\text{Ph}$  and CT (#1).

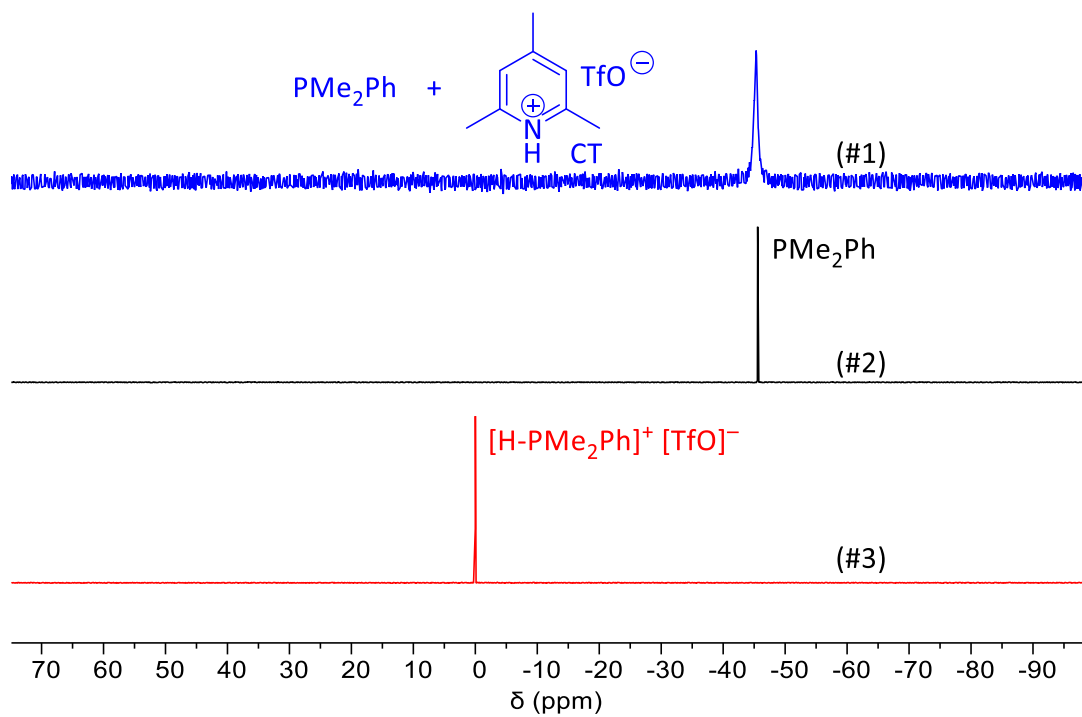

**Fig. S6.** Comparison of the  $^{31}\text{P}$  NMR spectra (162 MHz,  $\text{CD}_2\text{Cl}_2$ ) of  $\text{PMe}_2\text{Ph}$  (#2) and  $[\text{H-PMe}_2\text{Ph}]^+ [\text{TfO}]^-$  (#3) with that of a mixture of  $\text{PMe}_2\text{Ph}$  and CT (#1).

## 3.2 Interactions of Proton Sources with Electrophiles

### 3.2.1 Ethyl acrylate (**1**) with 2,4,6-collidinium triflate (CT)

Figure S7 indicates that CT does not change the  $^1\text{H}$  NMR spectrum of ethyl acrylate **1** (in  $\text{CD}_2\text{Cl}_2$ ).

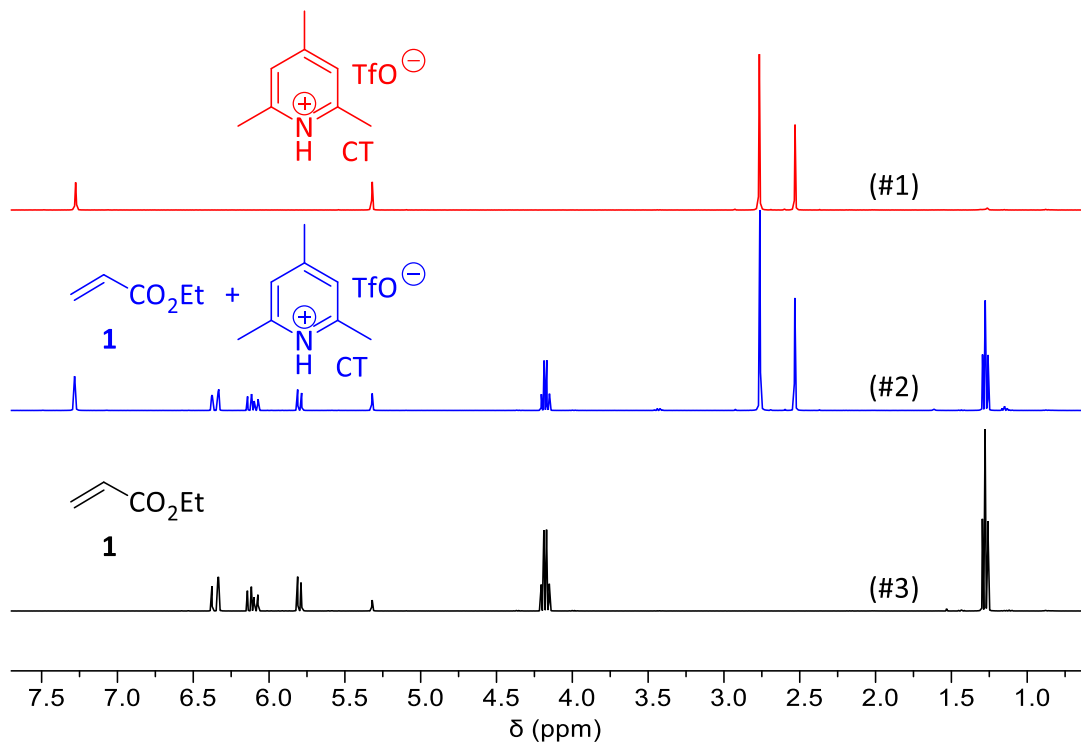

**Fig. S7.** Comparison of the  $^1\text{H}$  NMR spectra (400 MHz,  $\text{CD}_2\text{Cl}_2$ ) of CT (#1) and **1** (#3) with that of a mixture of CT and **1** (#2).



### 3.2.2 Ethyl allenoate (**2**) with CT

Figure S8 shows that CT does not change the  $^1\text{H}$  NMR spectrum of ethyl allenoate **2** (in  $\text{CD}_2\text{Cl}_2$ ).<sup>S6</sup>

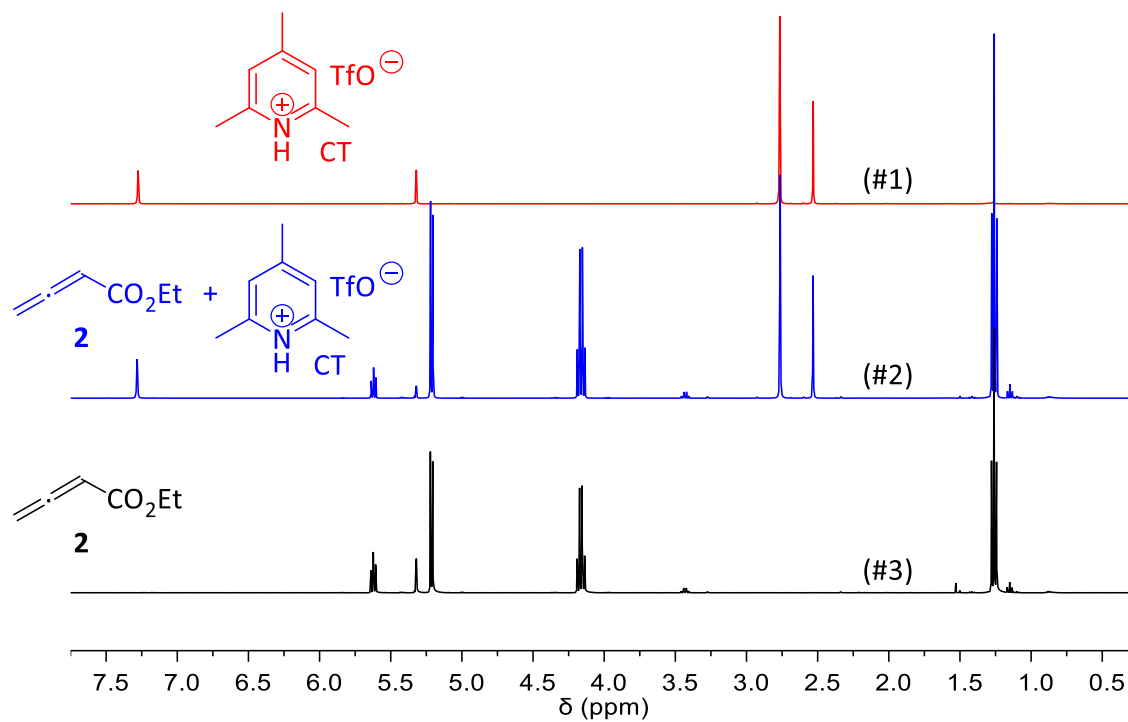

**Fig. S8.** Comparison of the  $^1\text{H}$  NMR spectra (400 MHz,  $\text{CD}_2\text{Cl}_2$ ) of CT (#1) and **2** (#3) with that of a mixture of CT and **2** in  $\text{CD}_2\text{Cl}_2$  (#2).

### 3.2.3 Ethyl propiolate (**3**) with CT

Figure S9 indicates that CT does not change the  $^1\text{H}$  NMR spectrum of ethyl propiolate **3** (in  $\text{CD}_2\text{Cl}_2$ ).

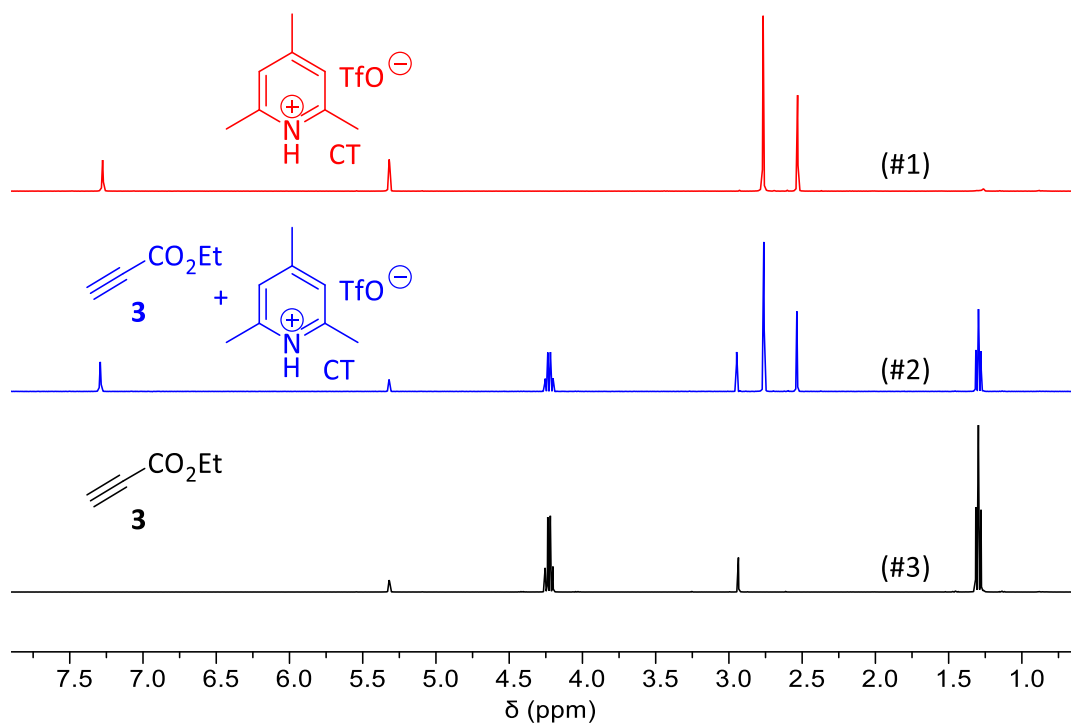

**Fig. S9.** Comparison of the  $^1\text{H}$  NMR spectra (400 MHz,  $\text{CD}_2\text{Cl}_2$ ) of CT (#1) and **3** (#3) with that of a mixture of **3** and CT (#2).

### 3.2.5 Ethyl acrylate (**1**) with tributylphosphonium triflate (TBPT)

Figure S10 shows that TBPT does not change the  $^1\text{H}$  NMR spectrum of ethyl acrylate **1** (in  $\text{CD}_2\text{Cl}_2$ ).

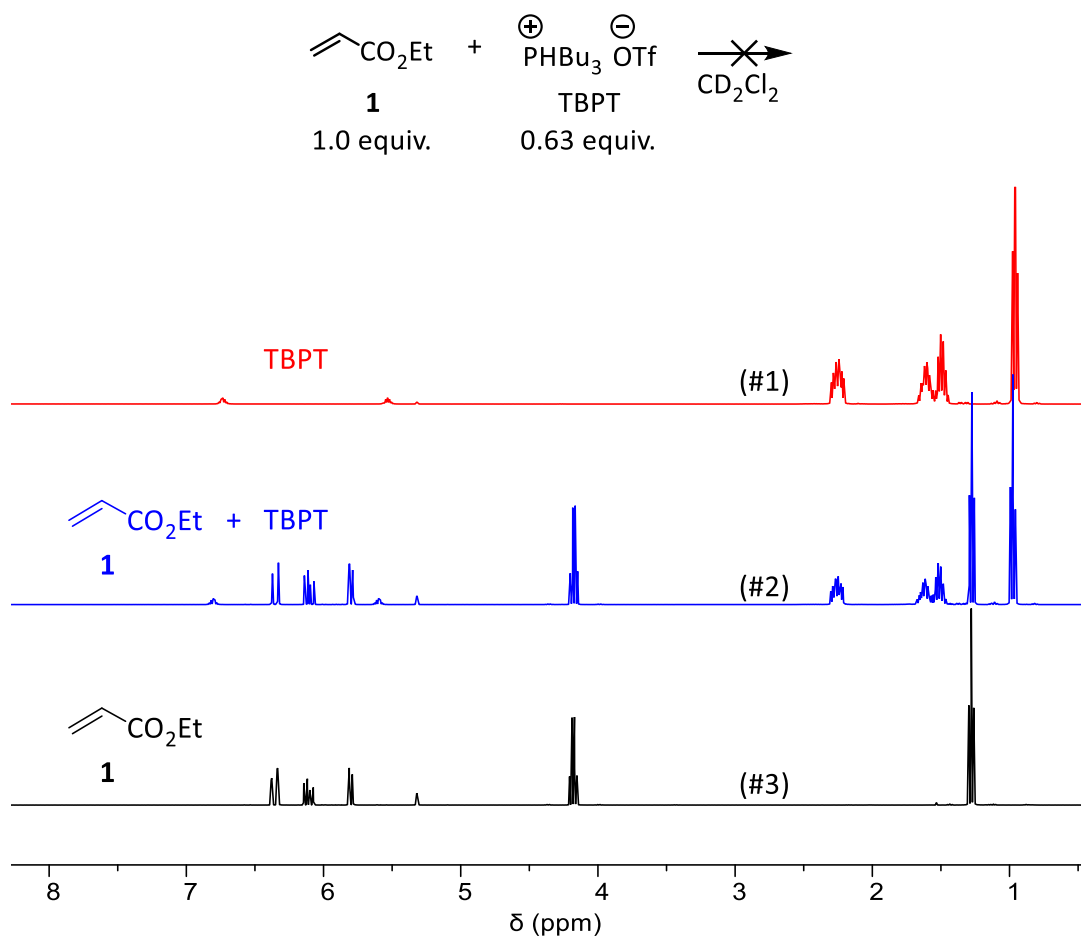

**Fig. S10.** Comparison of the  $^1\text{H}$  NMR spectra (400 MHz,  $\text{CD}_2\text{Cl}_2$ ) of TBPT (#1) and **1** (#3) with that of a mixture of **1** and TBPT (#2).

### 3.3 Stability of the Electrophiles 2 and 5 in the Presence of Triethylamine

#### 3.3.1 Ethyl 2,3-butadienoate (2) + trimethylamine (TEA)

Ethyl-2,3-butadienoate (2) does not tautomerise (within 16 h) to ethyl 2-butynoate (5) when mixed with TEA in dichloromethane (Figure S11).

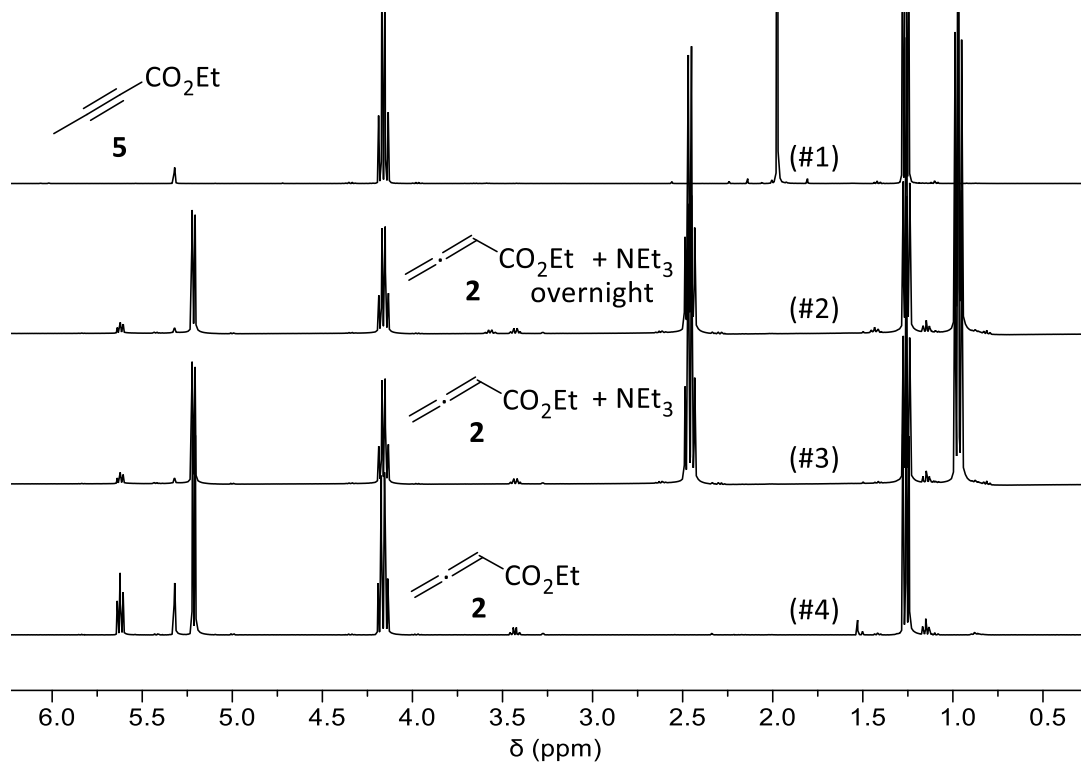

**Fig. S11.** Comparison of the <sup>1</sup>H NMR spectra (400 MHz, CD<sub>2</sub>Cl<sub>2</sub>) of 5 (#1) and 2 (#4) with those of a mixture of 2 with triethylamine (after mixing: #3, overnight: #2).

### 3.3.2 Ethyl 2-butynoate (5) + trimethylamine (TEA)

Ethyl 2-butynoate (5) does not tautomerise (within 16 h) to ethyl-2,3-butadienoate (2) when mixed with TEA in dichloromethane (Figure S12).

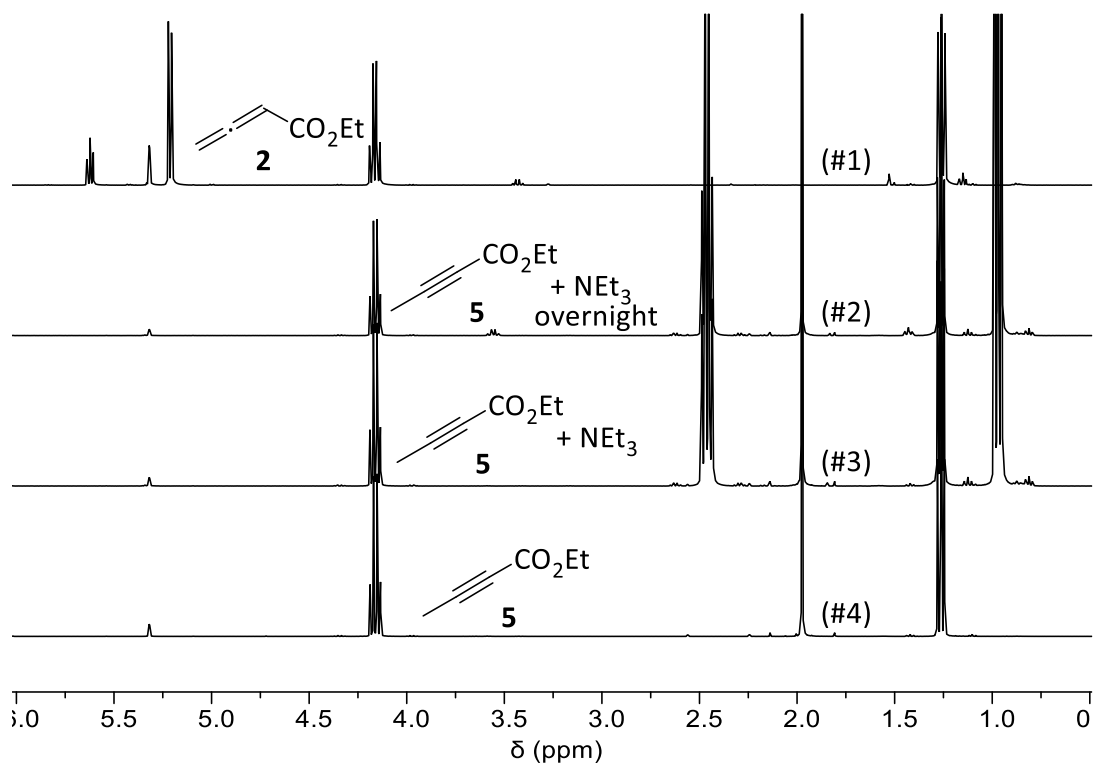

**Fig. S12.** Comparison of the <sup>1</sup>H NMR spectra (400 MHz, CD<sub>2</sub>Cl<sub>2</sub>) of **2** (#1) and **5** (#4) with those of a mixture of **5** with triethylamine (after mixing: #3, overnight: #2).



### 3.4.2 Ethyl 2,3-butadienoate (**2**) with triethylammonium triflate (TEAT)

Ethyl 2,3-butadienoate (**2**) does not tautomerise to ethyl 2-butynoate (**5**) when mixed with TEAT in dichloromethane. Mixtures of **2** and TEAT show identical  $^1\text{H}$  NMR chemical shifts that agree with the NMR resonances of the individual compounds and excludes significant interactions between TEAT and the electrophile **2**. Only after long reaction times (overnight) additional resonances of potential reaction products become detectable (Figure S14).

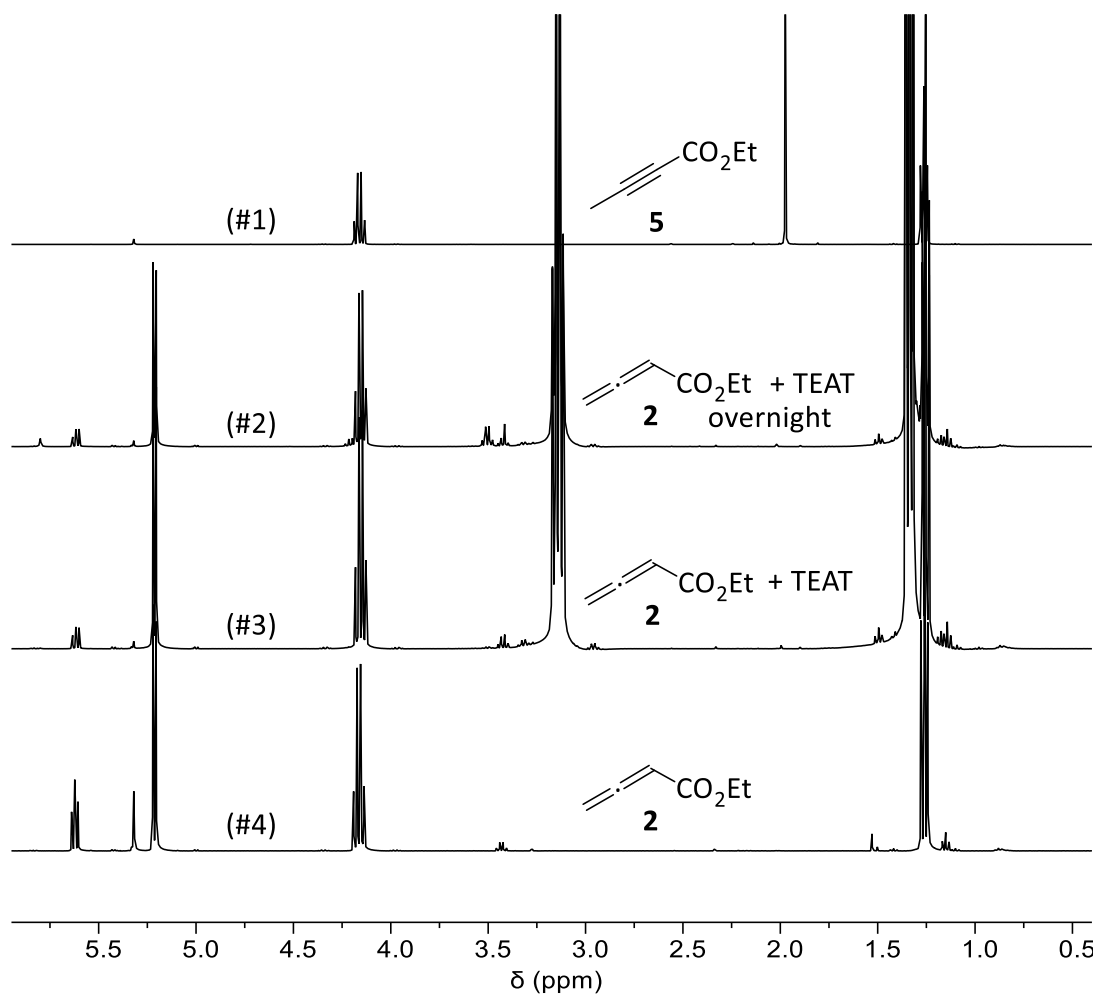

**Fig. S14.** Comparison of the  $^1\text{H}$  NMR spectra (400 MHz,  $\text{CD}_2\text{Cl}_2$ ) of **5** (#1) and its tautomer **2** (#4) with those of a mixture of **2** with TEAT (after mixing: #3, overnight: #2).

### 3.4.3 Ethyl 2-butynoate (**5**) with triethylammonium triflate (TEAT)

Ethyl 2-butynoate (**5**) does not tautomerise to ethyl-2,3-butadieneoate (**2**) when mixed with trimethylammonium triflate in dichloromethane (Figure S15).

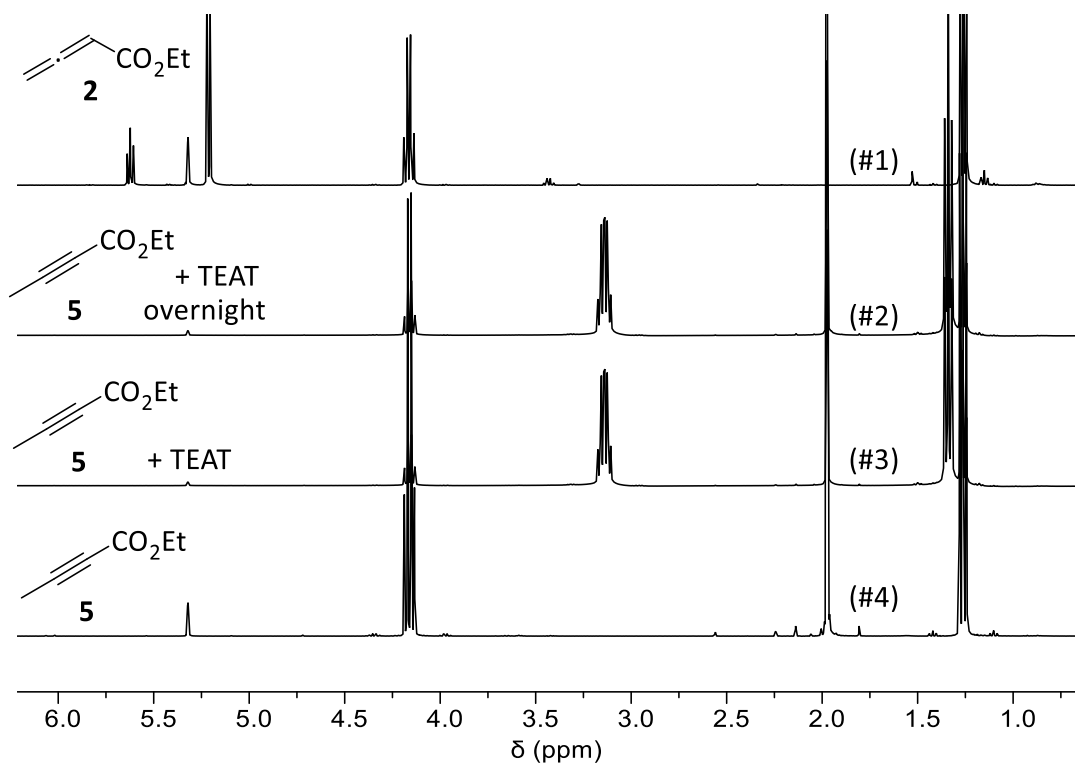

**Fig. S15.** Comparison of the <sup>1</sup>H NMR spectra (400 MHz, CD<sub>2</sub>Cl<sub>2</sub>) of **2** (#1) and its tautomer **5** (#4) with those of a mixture of **5** and TEAT (after mixing: #3, overnight: #2).



### 3.4.4 In situ generation of trimethylphosphine $\text{PMe}_3$ in $\text{CD}_2\text{Cl}_2$

The  $^1\text{H}$ ,  $^{13}\text{C}$ , and  $^{31}\text{P}$  NMR spectra in Figure S16 show that  $\text{NEt}_3$  is a stronger Brønsted base than  $\text{PMe}_3$  (in  $\text{CD}_2\text{Cl}_2$ ). Thus, a quantitative amount of  $\text{PMe}_3$  is liberated when  $[\text{HPMe}_3]^+ [\text{BF}_4]^-$  is mixed with  $\text{NEt}_3$ . The NMR spectroscopic data for resonances assigned to  $\text{PMe}_3$  (in the mixtures with triethylammonium tetrafluoroborate) agree with those reported for pure  $\text{PMe}_3$ .<sup>59</sup>

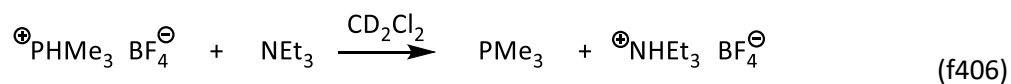

For  $\text{PMe}_3$ :

$^1\text{H}$  NMR (400 MHz,  $\text{CD}_2\text{Cl}_2$ )  $\delta$  0.99–0.98 (m, 9 H).  $^{13}\text{C}\{^1\text{H}\}$  NMR (101 MHz,  $\text{CD}_2\text{Cl}_2$ )  $\delta$  16.4 (d,  $J = 11.5$  Hz).

$^{31}\text{P}$  NMR (162 MHz,  $\text{CD}_2\text{Cl}_2$ )  $\delta$  -61.5.

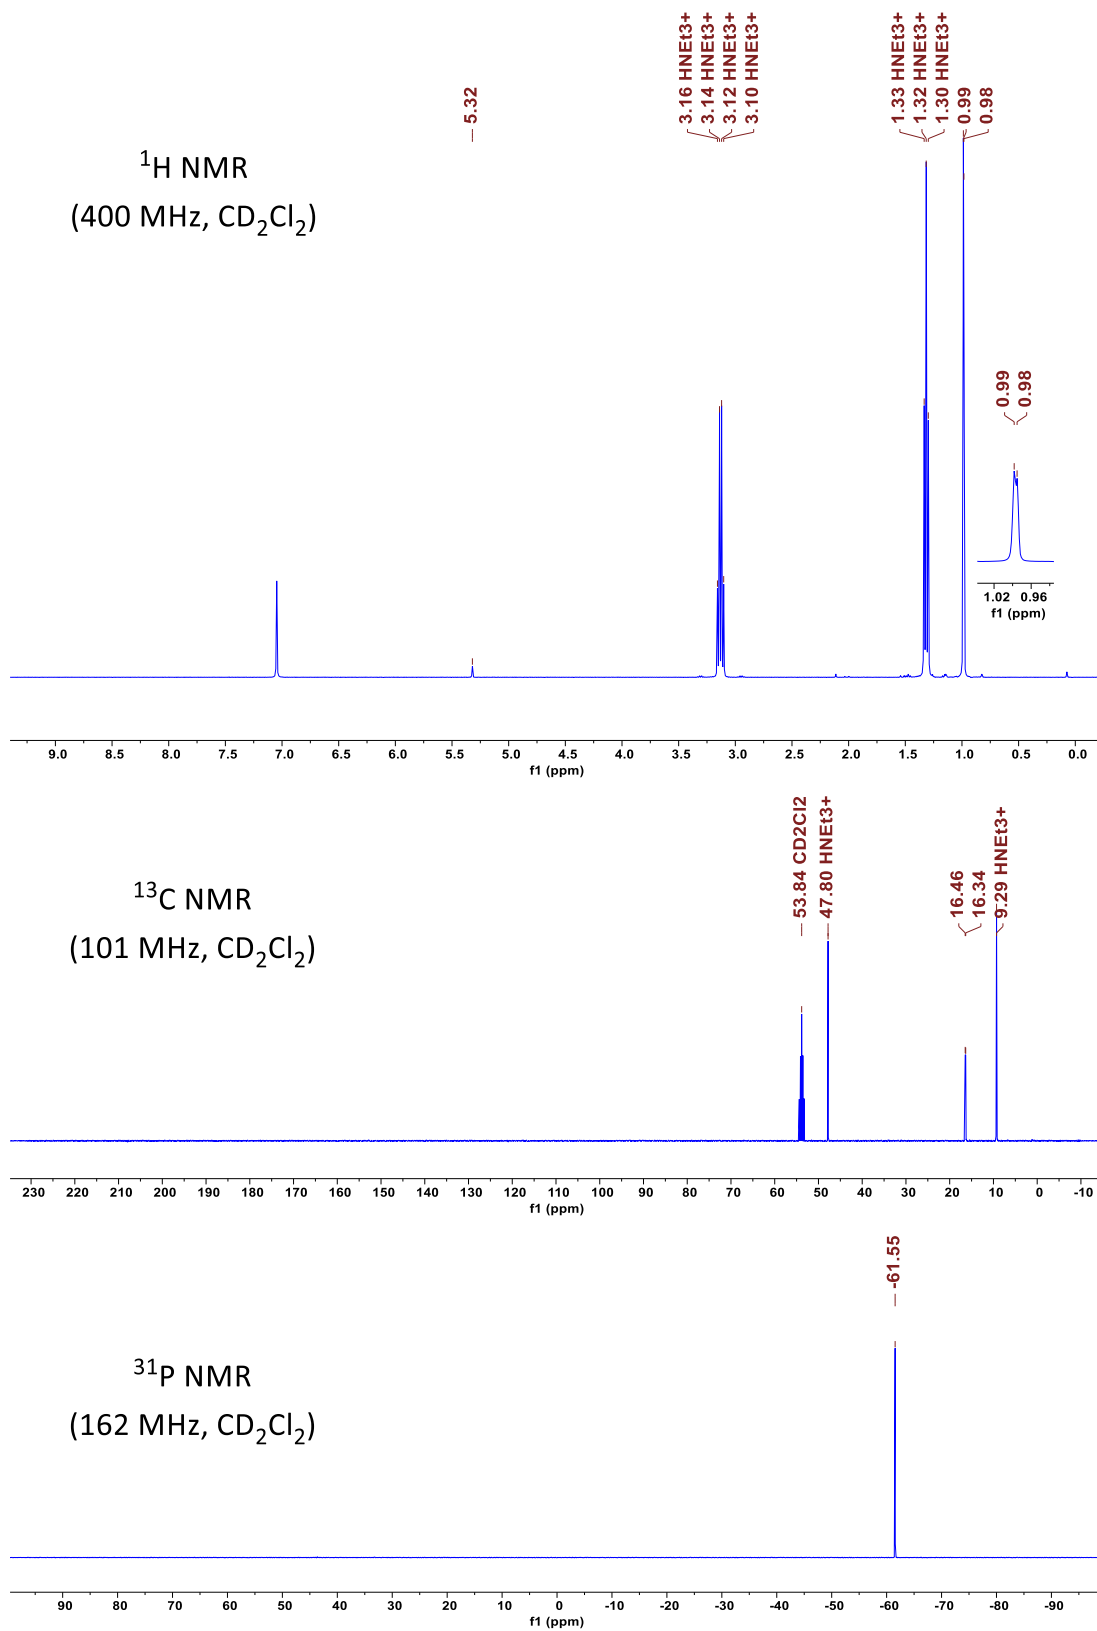

Fig. S16. <sup>1</sup>H, <sup>13</sup>C, and <sup>31</sup>P NMR spectra of a mixture of [HPMe<sub>3</sub>]<sup>+</sup> [BF<sub>4</sub>]<sup>-</sup> with NEt<sub>3</sub> (1.0 equiv) in CD<sub>2</sub>Cl<sub>2</sub>.

### 3.4.5 Generation of tricyclohexylphosphine PCy<sub>3</sub> in CD<sub>2</sub>Cl<sub>2</sub>

The <sup>31</sup>P NMR spectrum in Figure S17 shows that NEt<sub>3</sub> is a stronger Brønsted base than PCy<sub>3</sub> (in CD<sub>2</sub>Cl<sub>2</sub>). Thus, a quantitative amount of PCy<sub>3</sub> is liberated when [HPCy<sub>3</sub>]<sup>+</sup> [TfO]<sup>-</sup> is mixed with NEt<sub>3</sub>. The NMR spectroscopic data for the <sup>31</sup>P resonance assigned to PCy<sub>3</sub> (in a mixture with TEAT) agrees with that reported for pure PCy<sub>3</sub>.<sup>S10</sup>

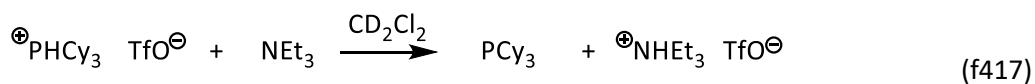

For PCy<sub>3</sub>: <sup>31</sup>P NMR (162 MHz, CD<sub>2</sub>Cl<sub>2</sub>) δ 10.5.

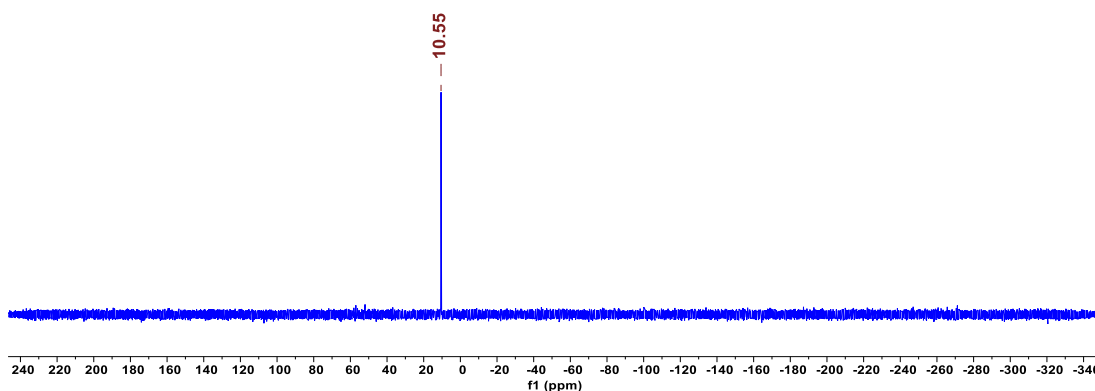

**Fig. S17.** <sup>31</sup>P NMR spectrum (162 MHz) of a mixture of [HPCy<sub>3</sub>]<sup>+</sup> [TfO]<sup>-</sup> with NEt<sub>3</sub> (1 equiv) in CD<sub>2</sub>Cl<sub>2</sub>.

### 3.4.6 Generation of trioctylphosphine POct<sub>3</sub> in CD<sub>2</sub>Cl<sub>2</sub>

The <sup>31</sup>P NMR spectrum in Figure S18 shows that NEt<sub>3</sub> is a stronger Brønsted base than POct<sub>3</sub> (in CD<sub>2</sub>Cl<sub>2</sub>). Thus, a quantitative amount of POct<sub>3</sub> is liberated when [HPOct<sub>3</sub>]<sup>+</sup> [TfO]<sup>-</sup> is mixed with NEt<sub>3</sub>. The NMR spectroscopic data for the <sup>31</sup>P resonance assigned to POct<sub>3</sub> (in a mixture with TEAT) agrees with that reported for pure POct<sub>3</sub>.<sup>S11</sup>

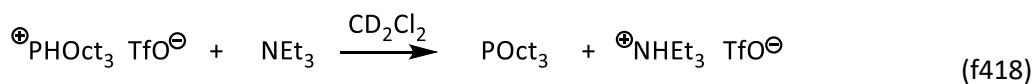

For POct<sub>3</sub>: <sup>31</sup>P NMR (162 MHz, CD<sub>2</sub>Cl<sub>2</sub>) δ -31.3 (t, J = 6.6 Hz)

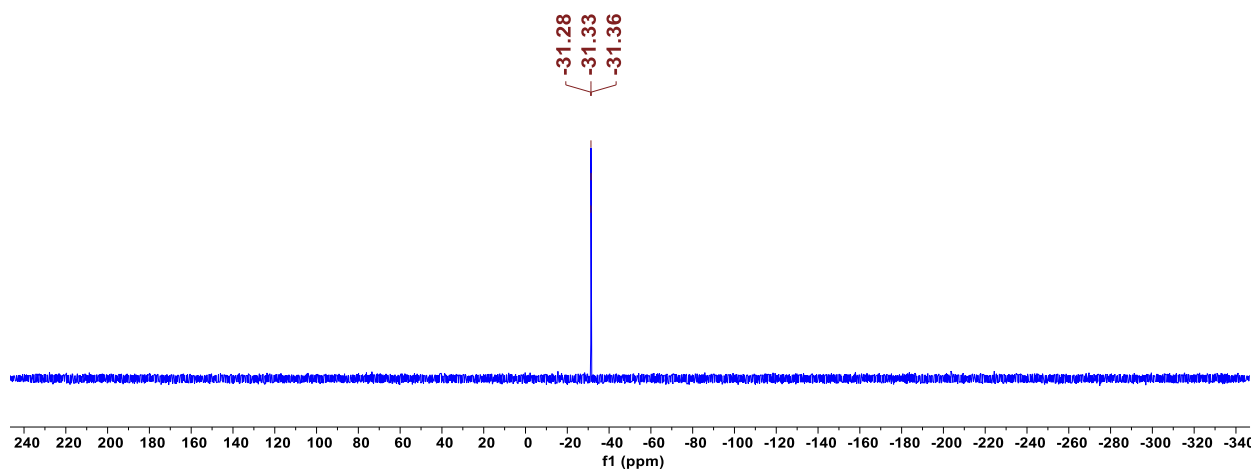

**Fig. S18.** <sup>31</sup>P NMR spectrum (162 MHz) of a mixture of [HPCy<sub>3</sub>]<sup>+</sup> [TfO]<sup>-</sup> with NEt<sub>3</sub> (1.0 equiv) in CD<sub>2</sub>Cl<sub>2</sub>.

### 3.5 Deprotonation of Phosphonium Salts P1 and P2

#### 3.5.1 Deprotonation of P1 with KOtBu in $d_6$ -DMSO

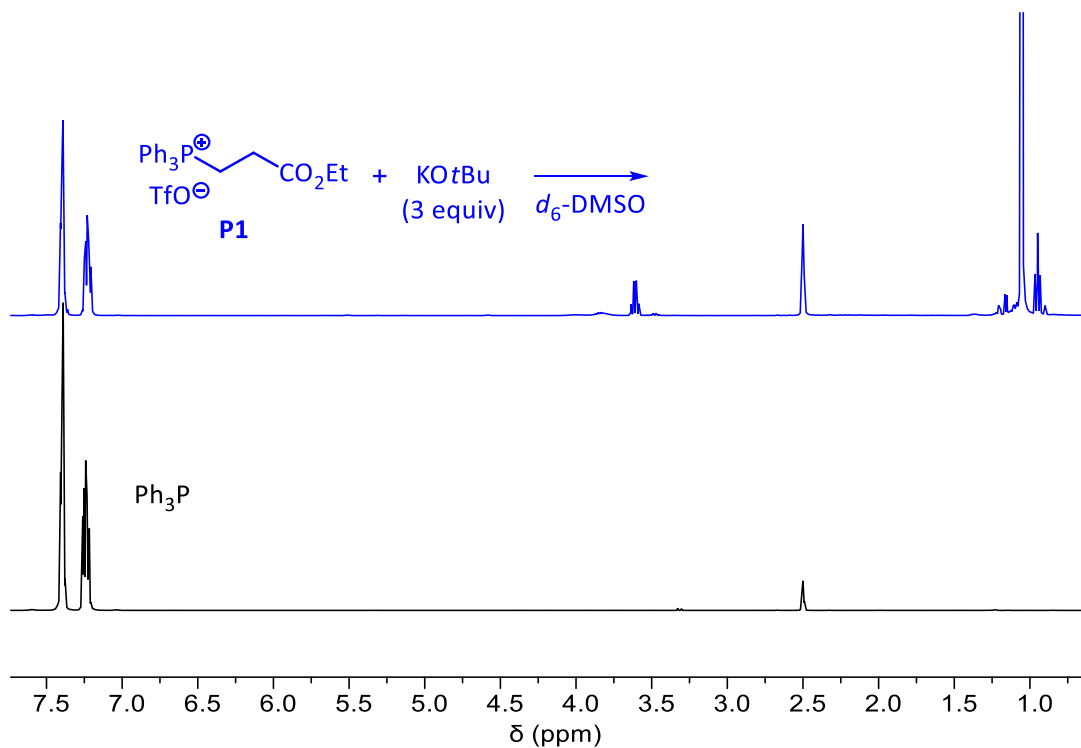

**Fig. S19.** Comparison of the  $^1\text{H}$  NMR spectrum (400 MHz,  $d_6$ -DMSO) of  $\text{PPh}_3$  (bottom, black) with that of a P1/KOtBu mixture (top, blue).

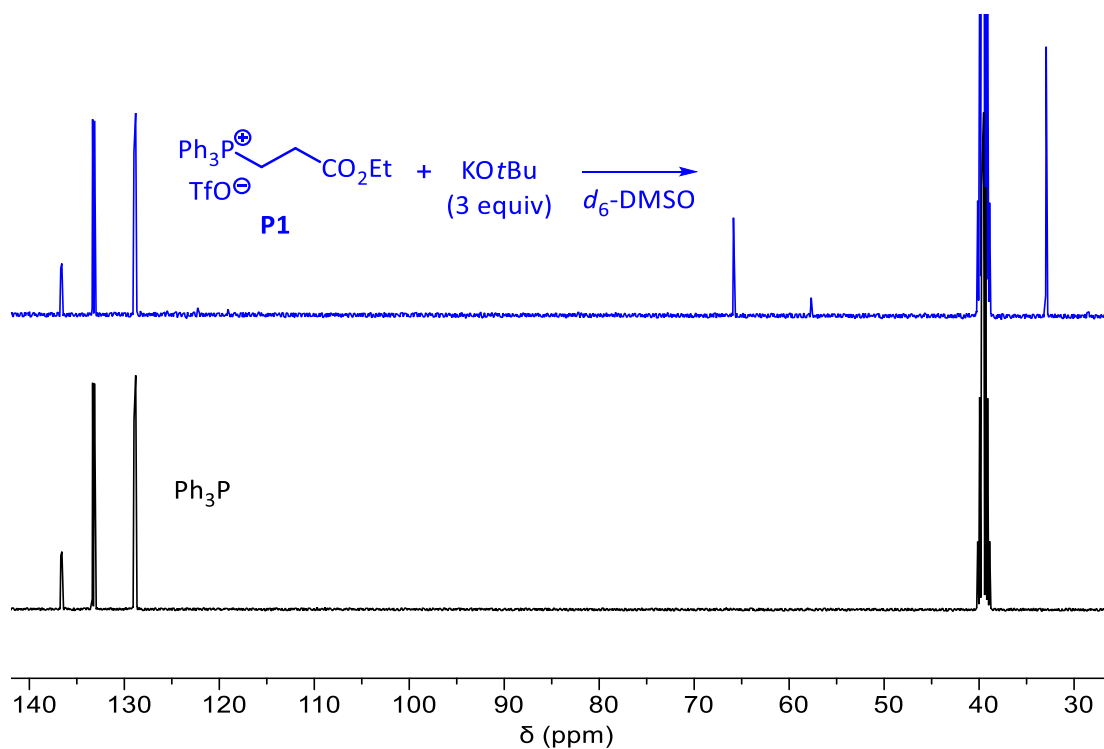

**Fig. S20.** Comparison of the  $^{13}\text{C}$  NMR spectrum (101 MHz,  $d_6$ -DMSO) of  $\text{PPh}_3$  (bottom, black) with that of a  $\text{P1}/\text{KOtBu}$  mixture (top, blue).

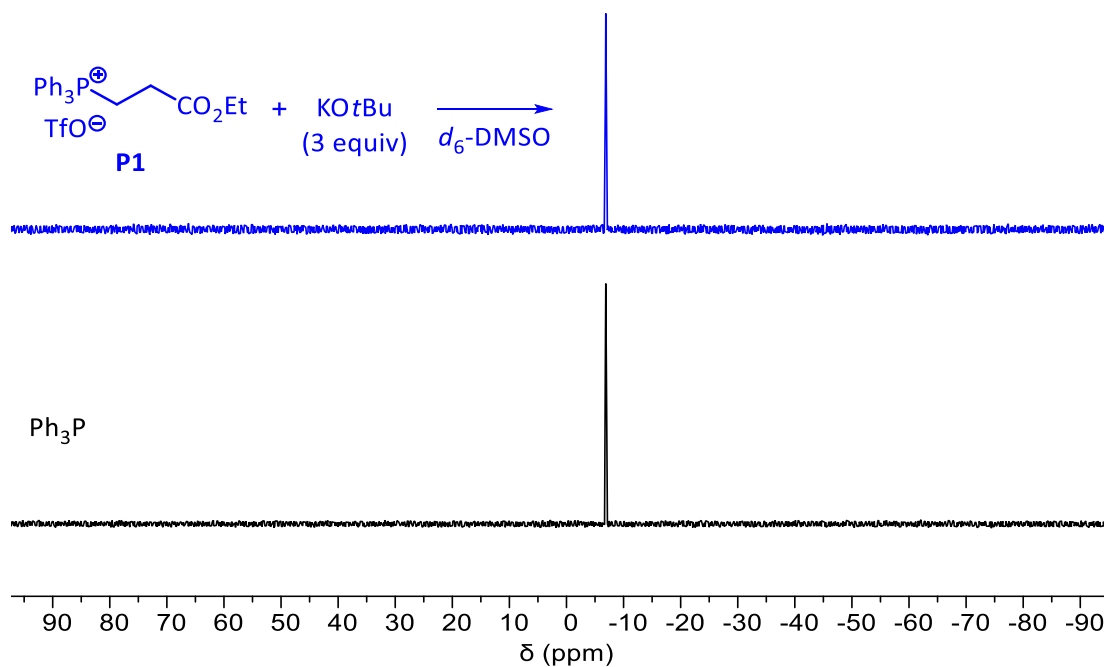

**Fig. S21.** Comparison of the  $^{31}\text{P}$  NMR spectrum (162 MHz,  $d_6$ -DMSO) of  $\text{PPh}_3$  (bottom, black) with that of a  $\text{P1}/\text{KOtBu}$  mixture (top, blue).

### 3.5.2 Deprotonation of P2 with KOtBu in $d_6$ -DMSO

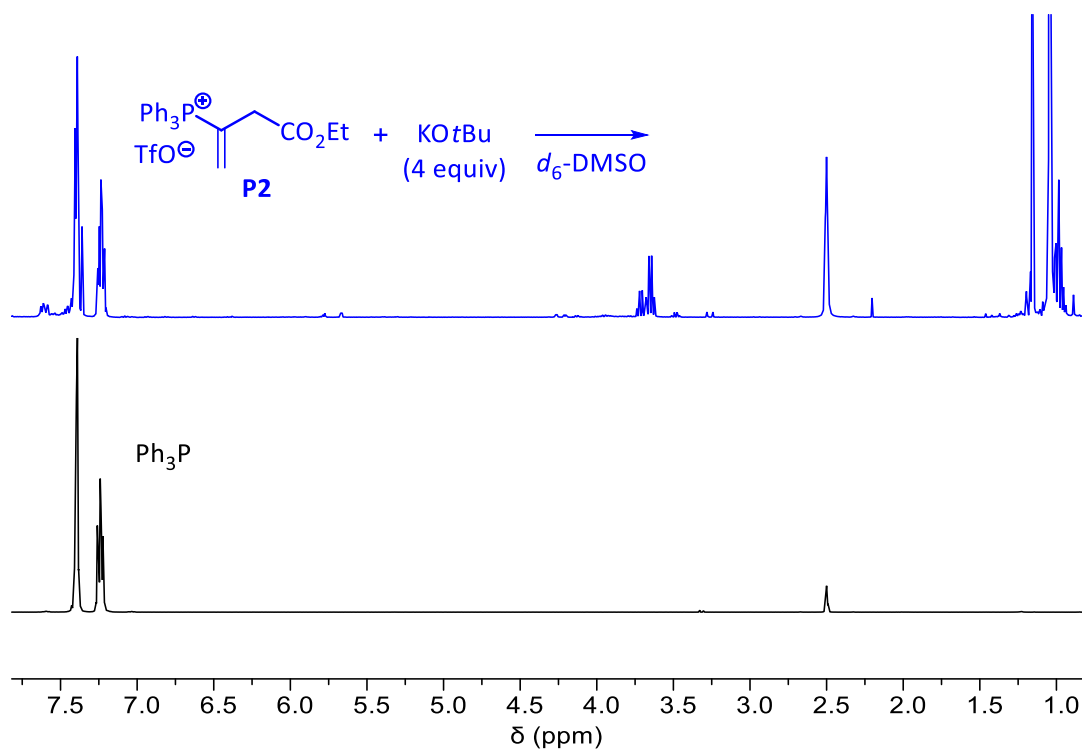

**Fig. S22.** Comparison of the  $^1\text{H}$  NMR spectrum (400 MHz,  $d_6$ -DMSO) of  $\text{PPh}_3$  (bottom, black) with that of a **P2**/ $\text{KOtBu}$  mixture (top, blue).

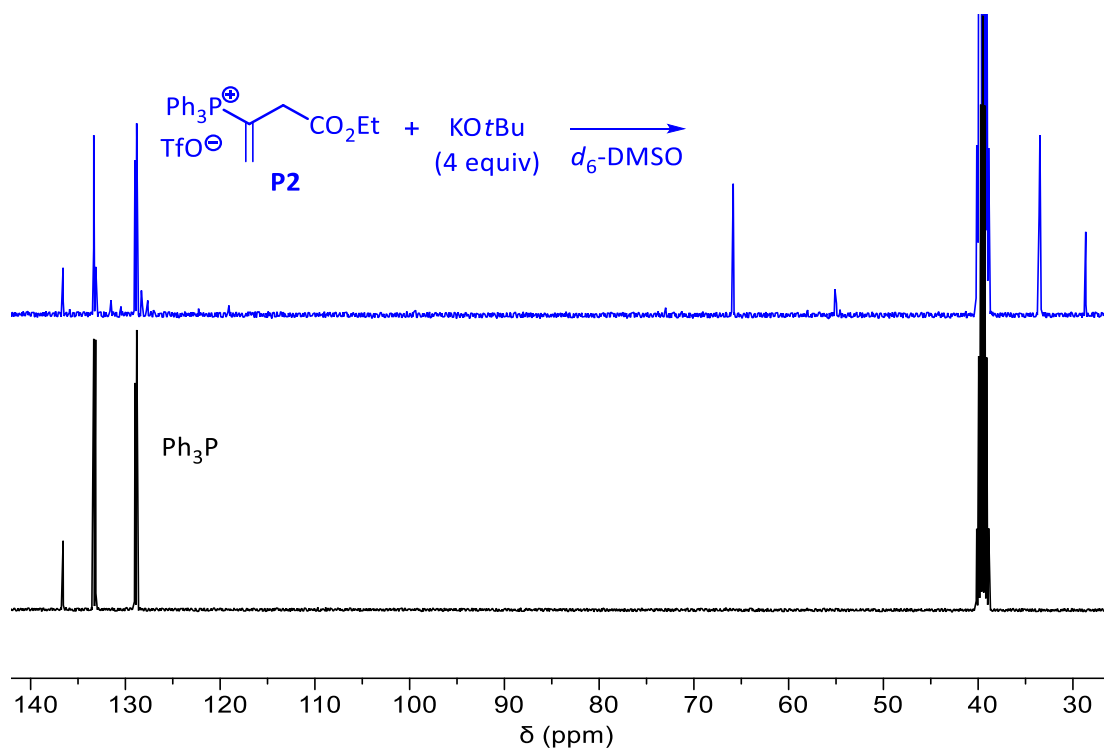

**Fig. S23.** Comparison of the  $^{13}\text{C}$  NMR spectrum (101 MHz,  $d_6\text{-DMSO}$ ) of  $\text{PPh}_3$  (bottom, black) with that of a **P2**/ $\text{KOtBu}$  mixture (top, blue).

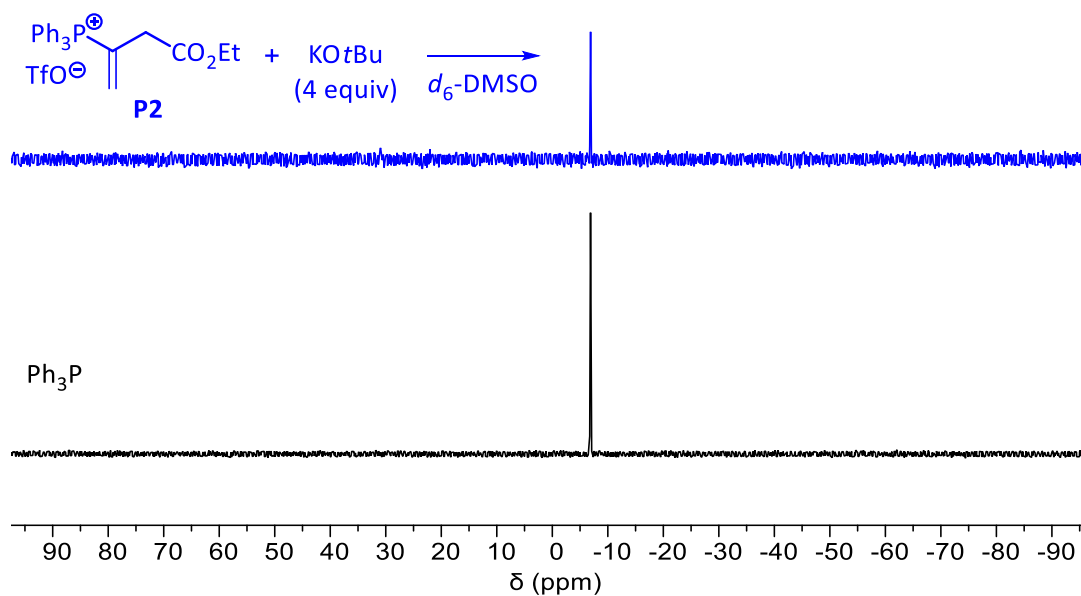

**Fig. S24.** Comparison of the  $^{31}\text{P}$  NMR spectrum (162 MHz,  $d_6\text{-DMSO}$ ) of  $\text{PPh}_3$  (bottom, black) with that of a **P2**/ $\text{KOtBu}$  mixture (top, blue).



## 4 UV-Vis Absorption Spectra in Dichloromethane

### 4.1 General

UV-Vis absorption spectra were determined by using J&M TIDAS diode array spectrophotometers controlled by Labcontrol Spectacle or TidasDAQ 3.8.1 software and connected to a Hellma 661.502-QX quartz Suprasil immersion probe (5 mm light path) via fibre optic cables and standard SMA connectors. The temperature of the solutions during the measurements was maintained to  $20 \pm 0.2$  °C by using circulating bath cryostats.

Anhydrous dichloromethane was freshly distilled over calcium hydride under an atmosphere of dry nitrogen.

## 4.2 UV-Vis Absorption Spectra of Phosphines PR<sub>3</sub>

**Table S2.** UV-vis absorption spectra of phosphines PR<sub>3</sub> in dichloromethane.

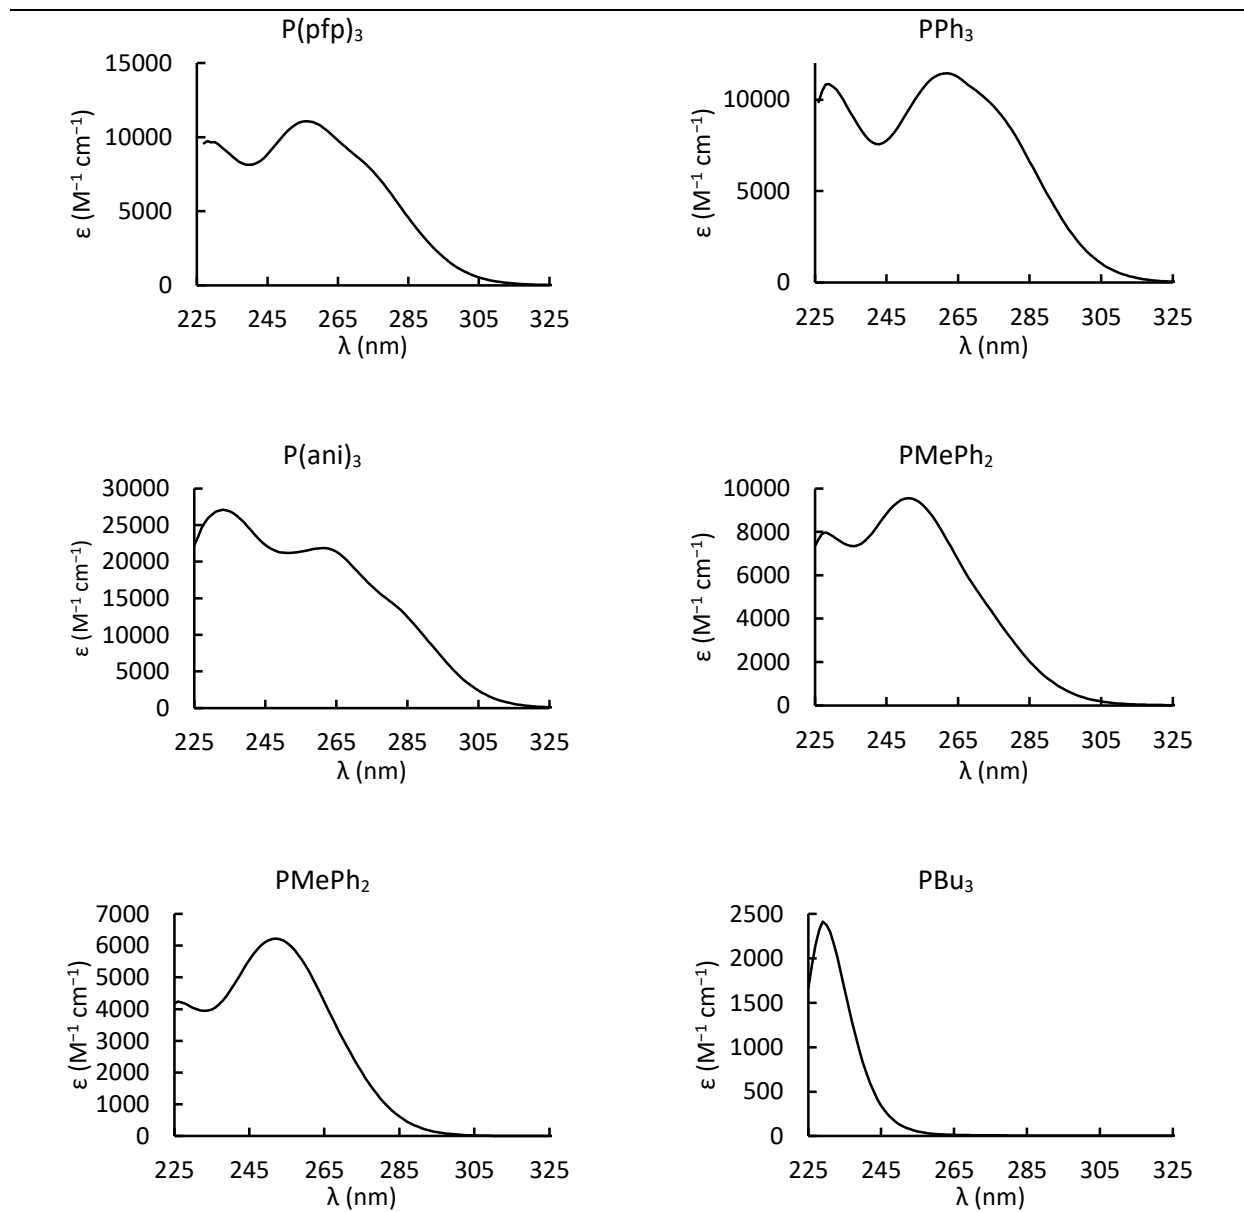

Trialkylphosphonium triflates [HPR<sub>3</sub>]<sup>+</sup>[TfO]<sup>-</sup> with R = Me, Bu, Oct, or Cy have  $\epsilon < 20 \text{ M}^{-1} \text{cm}^{-1}$  at  $\lambda > 225$  nm (in dichloromethane).

### 4.3 UV-Vis Absorption Spectra of Triethylamine, TEAT, 2,4,6-Collidine and CT

**Table S3.** UV-Vis absorption spectra of  $\text{NEt}_3$ , TEAT, 2,4,6-collidine and CT in dichloromethane.

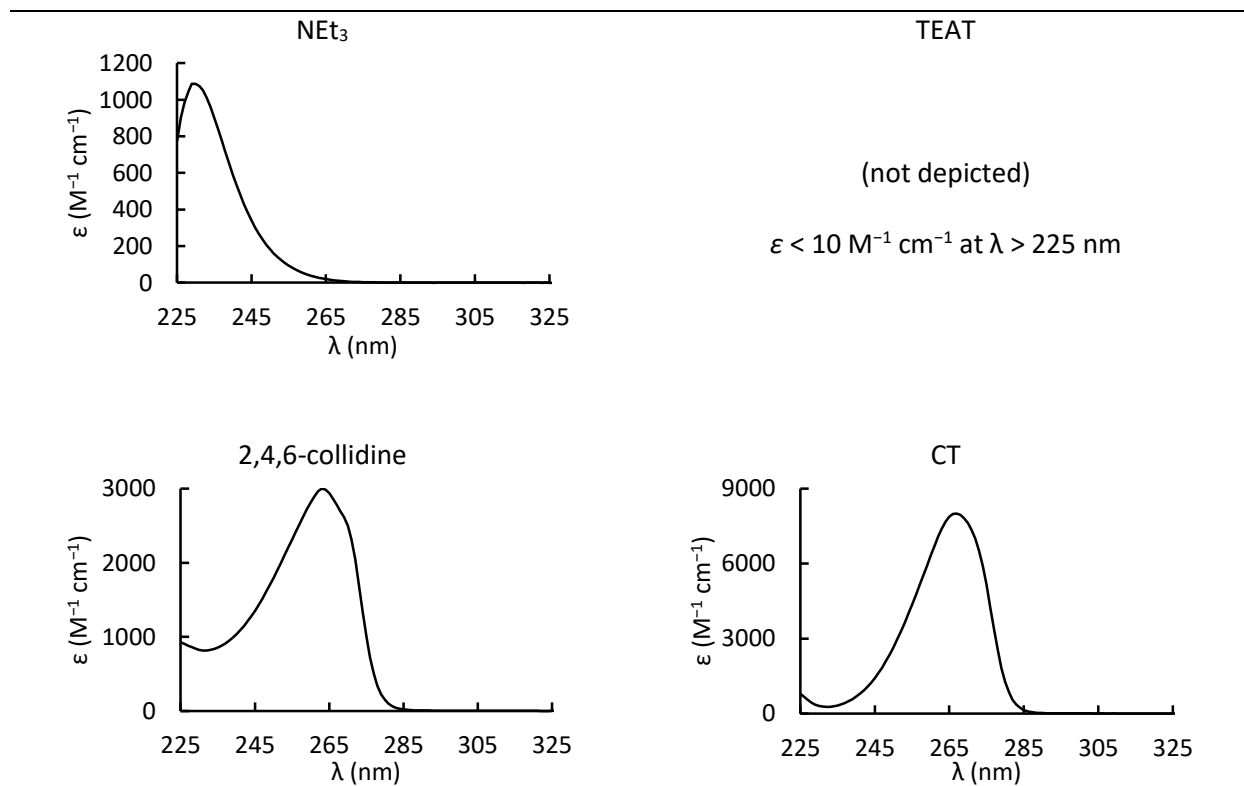

#### 4.4 UV-Vis Absorption Spectra of Electrophiles

**Table S4.** UV-Vis absorption spectra of electrophiles in dichloromethane.

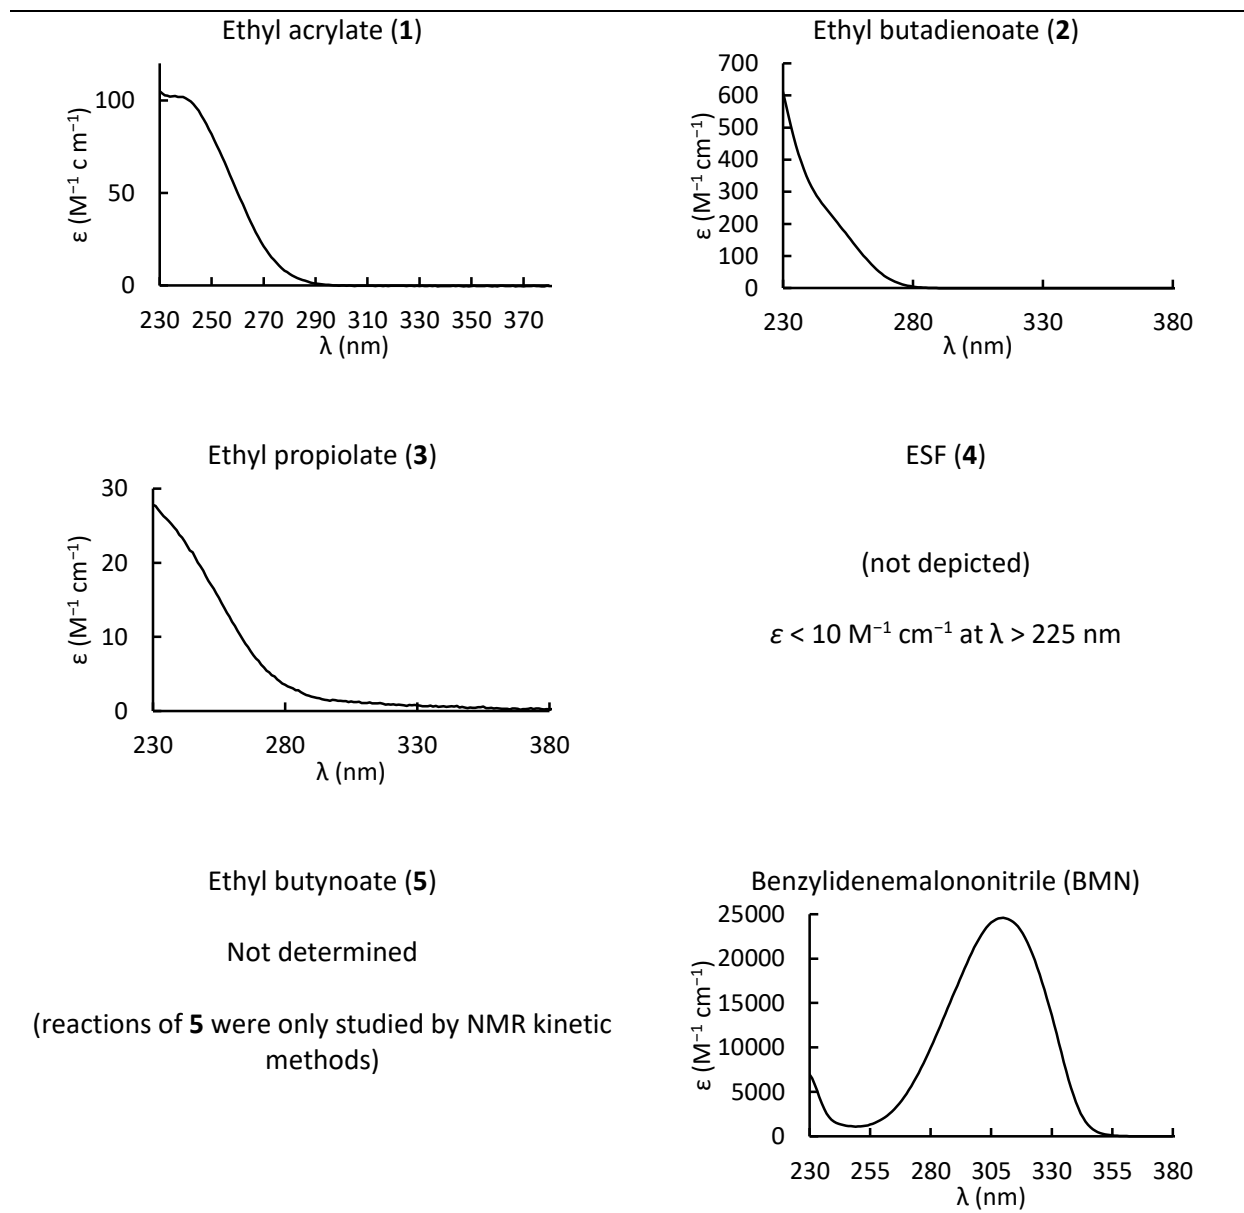

## 5 Kinetic Measurements

### 5.1 General

#### Kinetic Measurements with the Stopped-Flow UV-Vis Spectrometer

The kinetics of fast reactions ( $t_{1/2} < 40$  s) were followed by UV/Vis spectroscopy by using a stopped-flow spectrophotometer system (Applied Photophysics SX20 stopped-flow spectrometer; 5 or 10 mm light path). Stock solutions were prepared in anhydrous dichloromethane, which was freshly distilled from calcium hydride. The kinetic runs were initiated by mixing equal volumes of dichloromethane solutions of the nucleophiles and the electrophiles. The temperature of the solutions during the kinetic studies was maintained to  $20 \pm 0.2$  °C by using circulating bath cryostats.

#### Kinetic Measurements with Conventional UV-Vis Spectroscopy

The rates of slow reactions ( $t_{1/2} > 40$  s) were determined by using J&M TIDAS diode array spectrophotometers controlled by Labcontrol Spectacle or TidasDAQ 3.8.1 software and connected to a Hellma 661.502-QX quartz Suprasil immersion probe (5 mm light path) via fibre optic cables and standard SMA connectors. The temperature of the solutions during the kinetic studies was maintained to  $(20 \pm 0.1)$ °C by using circulating bath cryostats. Anhydrous dichloromethane was freshly distilled from calcium hydride under an atmosphere of dry nitrogen.

#### Kinetic Measurements with NMR Spectroscopy

The kinetics for phosphine-electrophile reactions with the rate constants  $k_2 < 4.0 \times 10^{-2} \text{ M}^{-1} \text{ s}^{-1}$  were followed by using a Bruker Avance III HD 400 MHz NMR spectrometer, which was equipped with a N<sub>2</sub> cooling unit ( $20 \pm 0.1$  °C). The exact 1.0 mL solutions in NMR tubes were prepared freshly under dry argon atmosphere (glove box). The kinetics were measured immediately after complete mixing. Triphenylphosphine oxide (Ph<sub>3</sub>P=O) or triethylphosphine oxide (Et<sub>3</sub>P=O) were used as internal integration standard (IIS) for <sup>31</sup>P NMR spectra. For reaction kinetics followed by <sup>1</sup>H NMR spectroscopy mesitylene was used as an internal integration standard (IIS).

## 5.2 Kinetic Experiments in Dichloromethane

### 5.2.1 Kinetics of the reactions of ethyl acrylate (**1**) with $\text{PR}_3$

Kinetics of the reactions of ethyl acrylate (**1**) with  $\text{P}(\text{pfp})_3$  in  $\text{CD}_2\text{Cl}_2$  (at 20 °C)

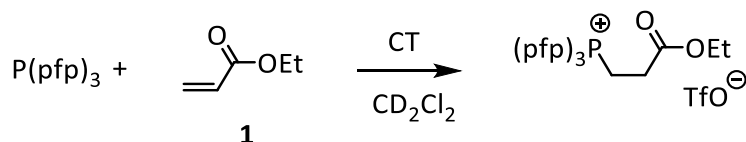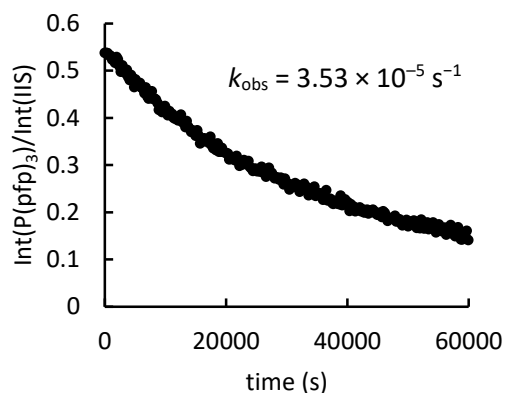

**Table S5.** Kinetics of the reaction of  $\text{P}(\text{pfp})_3$  and **1** (proton source: CT,  $^{31}\text{P}$  NMR method, monitoring of the decreasing  $^{31}\text{P}$  NMR signal of  $\text{P}(\text{pfp})_3$  at  $-9.1$  ppm, in  $\text{CD}_2\text{Cl}_2$ ,  $\text{Ph}_3\text{PO}$  as internal integration standard IIS)

| $[\text{P}(\text{pfp})_3]$ (M) | <b>[1]</b> (M)                          | [CT] (M)              | $k_{\text{obs}}$ ( $\text{s}^{-1}$ )    |
|--------------------------------|-----------------------------------------|-----------------------|-----------------------------------------|
| $1.02 \times 10^{-1}$          | <b><math>9.74 \times 10^{-1}</math></b> | $1.89 \times 10^{-1}$ | <b><math>2.19 \times 10^{-5}</math></b> |
| $1.02 \times 10^{-1}$          | <b>1.60</b>                             | $1.86 \times 10^{-1}$ | <b><math>3.53 \times 10^{-5}</math></b> |
| $1.04 \times 10^{-1}$          | <b>2.22</b>                             | $1.95 \times 10^{-1}$ | <b><math>5.09 \times 10^{-5}</math></b> |
| $1.02 \times 10^{-1}$          | <b>2.83</b>                             | $1.91 \times 10^{-1}$ | <b><math>6.25 \times 10^{-5}</math></b> |

$k_2 = 2.22 \times 10^{-5} \text{ M}^{-1} \text{ s}^{-1}$

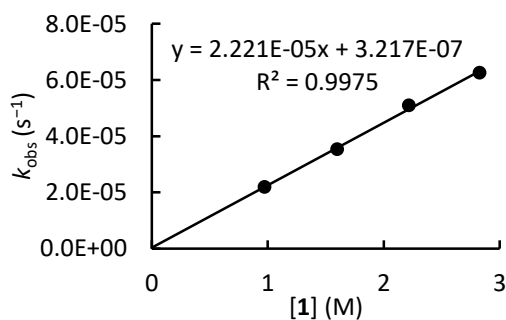

Kinetics of the reactions of ethyl acrylate (**1**) with PPh<sub>3</sub> in CD<sub>2</sub>Cl<sub>2</sub> (at 20 °C)

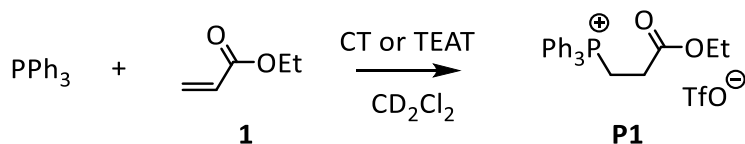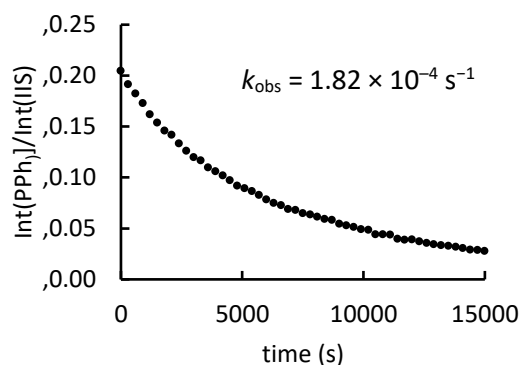

**Table S6.** Kinetics of the reaction of PPh<sub>3</sub> and **1** (proton source: CT or TEAT, <sup>31</sup>P NMR method, monitoring of the decreasing <sup>31</sup>P NMR signal of PPh<sub>3</sub> at -5.5 ppm, in CD<sub>2</sub>Cl<sub>2</sub>, Ph<sub>3</sub>PO as internal integration standard IIS)

| [PPh <sub>3</sub> ] (M) | [ <b>1</b> ] (M)                        | [CT] (M)              | $k_{\text{obs}}$ (s <sup>-1</sup> )     |
|-------------------------|-----------------------------------------|-----------------------|-----------------------------------------|
| $1.03 \times 10^{-1}$   | <b><math>9.79 \times 10^{-1}</math></b> | $2.25 \times 10^{-1}$ | <b><math>1.54 \times 10^{-4}</math></b> |
| $1.20 \times 10^{-1}$   | <b>1.16</b>                             | $2.42 \times 10^{-1}$ | <b><math>1.82 \times 10^{-4}</math></b> |
| $1.13 \times 10^{-1}$   | <b>1.40</b>                             | $2.11 \times 10^{-1}$ | <b><math>2.18 \times 10^{-4}</math></b> |
| $1.13 \times 10^{-1}$   | <b>1.59</b>                             | $2.11 \times 10^{-1}$ | <b><math>2.49 \times 10^{-4}</math></b> |
| [PPh <sub>3</sub> ] (M) | [ <b>1</b> ] (M)                        | [TEAT] (M)            | $k_{\text{obs}}$ (s <sup>-1</sup> )     |
| $8.76 \times 10^{-2}$   | <b><math>8.80 \times 10^{-1}</math></b> | $2.70 \times 10^{-1}$ | <b><math>1.38 \times 10^{-4}</math></b> |
| $1.06 \times 10^{-1}$   | <b>1.06</b>                             | $3.08 \times 10^{-1}$ | <b><math>1.66 \times 10^{-4}</math></b> |
| $1.08 \times 10^{-1}$   | <b>1.28</b>                             | $3.07 \times 10^{-1}$ | <b><math>2.00 \times 10^{-4}</math></b> |
| $1.07 \times 10^{-1}$   | <b>1.49</b>                             | $2.88 \times 10^{-1}$ | <b><math>2.33 \times 10^{-4}</math></b> |

$$k_2 = 1.55 \times 10^{-4} \text{ M}^{-1} \text{ s}^{-1}$$

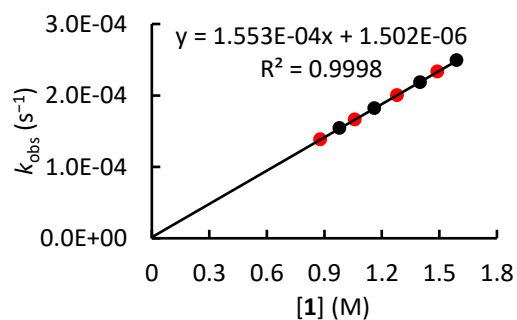

$^{31}\text{P}$  NMR spectroscopic analysis of selected samples indicated selective conversion of **1** to **P1** ( $\delta_{\text{P}} = +24.2$  ppm in  $\text{CD}_2\text{Cl}_2$ ) under the conditions of the kinetic experiments (Figure S25).

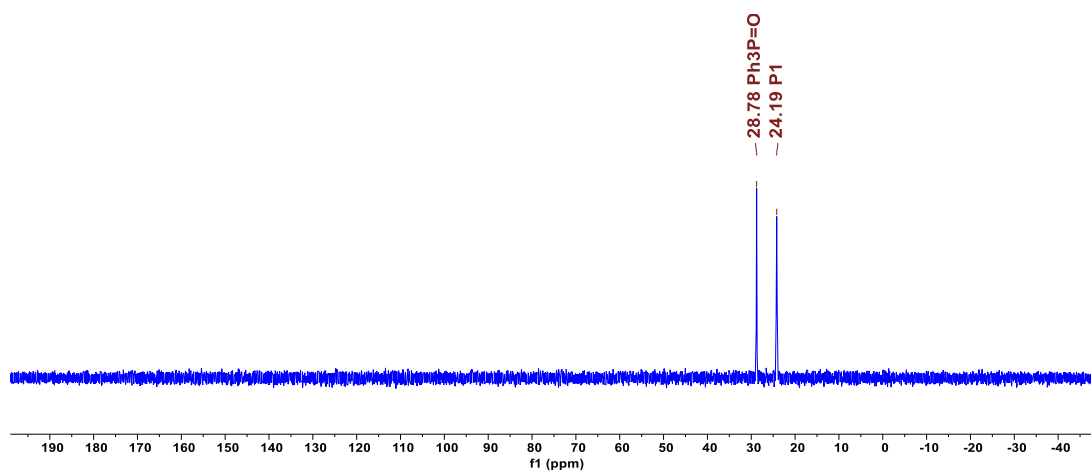

**Fig. S25.**  $^{31}\text{P}$  NMR (81 MHz) spectrum of the sample with  $[\text{Ph}_3\text{P}]_0 = 0.103$  M,  $[\mathbf{1}]_0 = 0.979$  M and  $[\text{CT}]_0 = 0.225$  M in  $\text{CD}_2\text{Cl}_2$  after completion of their reaction ( $\text{Ph}_3\text{P}=\text{O}$  as internal standard).



Kinetics of the reactions of ethyl acrylate (**1**) with P(ani)<sub>3</sub> in CD<sub>2</sub>Cl<sub>2</sub> (at 20 °C)

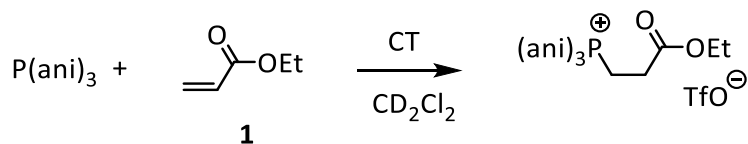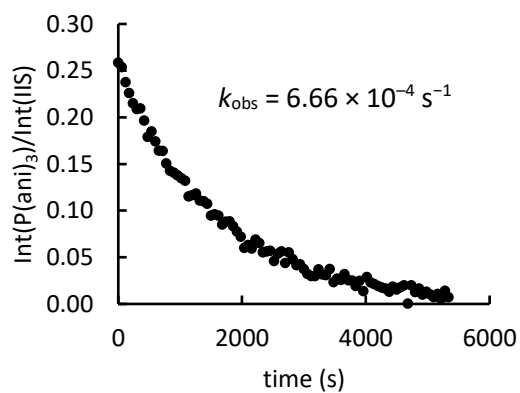

**Table S7.** Kinetics of the reaction of P(ani)<sub>3</sub> and **1** (proton source: CT, <sup>31</sup>P NMR method, monitoring of the decreasing <sup>31</sup>P NMR signal of P(ani)<sub>3</sub> at -10.4 ppm, in CD<sub>2</sub>Cl<sub>2</sub>, Ph<sub>3</sub>PO as internal integration standard IIS)

| [P(ani) <sub>3</sub> ] (M) | [ <b>1</b> ] (M)              | [CT] (M)                | <i>k</i> <sub>obs</sub> (s <sup>-1</sup> ) |
|----------------------------|-------------------------------|-------------------------|--------------------------------------------|
| 4.30 × 10 <sup>-2</sup>    | <b>4.42 × 10<sup>-1</sup></b> | 7.37 × 10 <sup>-2</sup> | <b>4.32 × 10<sup>-4</sup></b>              |
| 4.85 × 10 <sup>-2</sup>    | <b>7.61 × 10<sup>-1</sup></b> | 8.41 × 10 <sup>-2</sup> | <b>6.66 × 10<sup>-4</sup></b>              |
| 4.56 × 10 <sup>-2</sup>    | <b>9.04 × 10<sup>-1</sup></b> | 7.45 × 10 <sup>-2</sup> | <b>8.52 × 10<sup>-4</sup></b>              |
| 4.85 × 10 <sup>-2</sup>    | <b>1.10</b>                   | 8.63 × 10 <sup>-2</sup> | <b>1.04 × 10<sup>-3</sup></b>              |

$$k_2 = 9.32 \times 10^{-4} \text{ M}^{-1} \text{ s}^{-1}$$

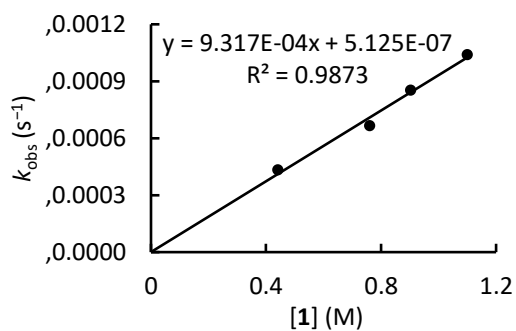

Kinetics of the reactions of ethyl acrylate (**1**) with PMePh<sub>2</sub> in CD<sub>2</sub>Cl<sub>2</sub> (at 20 °C)

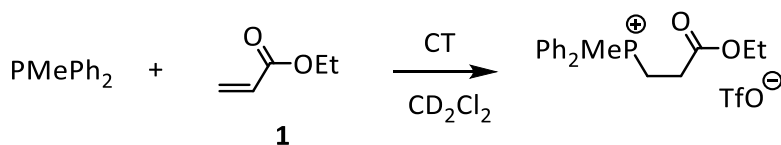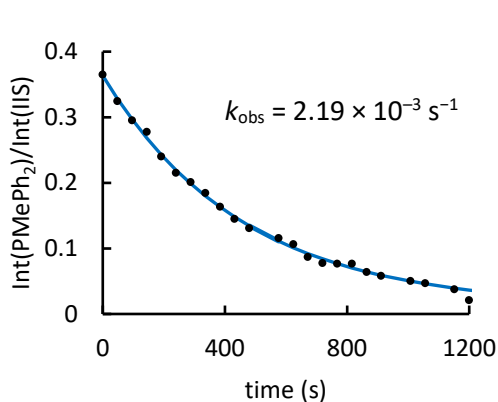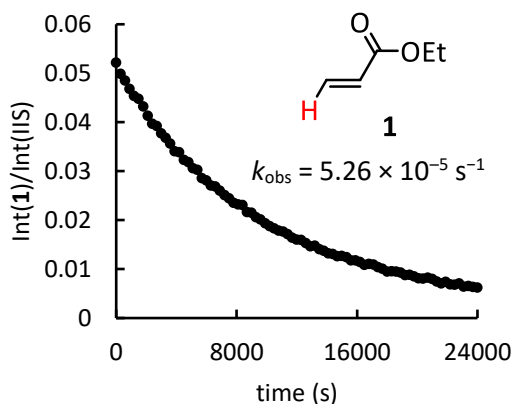

**Table S8.** Kinetics of the reaction of PMePh<sub>2</sub> and **1** (proton source: CT, <sup>31</sup>P NMR method, monitoring of the decreasing <sup>31</sup>P NMR signal of P(ani)<sub>3</sub> at -27.1 ppm, in CD<sub>2</sub>Cl<sub>2</sub>, Ph<sub>3</sub>PO as internal integration standard IIS)

| [PMePh <sub>2</sub> ] (M) | [ <b>1</b> ] (M)              | [CT] (M)                | <i>k</i> <sub>obs</sub> (s <sup>-1</sup> ) |
|---------------------------|-------------------------------|-------------------------|--------------------------------------------|
| 7.59 × 10 <sup>-2</sup>   | <b>7.16 × 10<sup>-1</sup></b> | 1.63 × 10 <sup>-1</sup> | <b>1.74 × 10<sup>-3</sup></b>              |
| 8.74 × 10 <sup>-2</sup>   | <b>9.28 × 10<sup>-1</sup></b> | 1.64 × 10 <sup>-1</sup> | <b>2.19 × 10<sup>-3</sup></b>              |
| 9.29 × 10 <sup>-2</sup>   | <b>1.13</b>                   | 1.92 × 10 <sup>-1</sup> | <b>2.67 × 10<sup>-3</sup></b>              |
| 9.09 × 10 <sup>-2</sup>   | <b>1.34</b>                   | 2.08 × 10 <sup>-1</sup> | <b>3.21 × 10<sup>-3</sup></b>              |

$$k_2 = 2.36 \times 10^{-3} \text{ M}^{-1} \text{ s}^{-1}$$

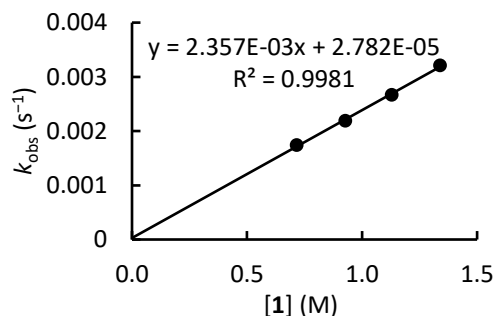

**Table S9.** Kinetics of the reaction of PMePh<sub>2</sub> and **1** (proton source: CT, <sup>1</sup>H NMR method, monitoring of the decreasing <sup>1</sup>H NMR signal of ethyl acrylate (**1**) at 5.80 ppm, in CD<sub>2</sub>Cl<sub>2</sub>, mesitylene as internal integration standard IIS)

| [PMePh <sub>2</sub> ] (M)     | [ <b>1</b> ] (M)        | [CT] (M)                | <i>k</i> <sub>obs</sub> (s <sup>-1</sup> ) |
|-------------------------------|-------------------------|-------------------------|--------------------------------------------|
| <b>5.59 × 10<sup>-2</sup></b> | 2.66 × 10 <sup>-3</sup> | 5.59 × 10 <sup>-3</sup> | <b>5.26 × 10<sup>-5</sup></b>              |
| <b>9.59 × 10<sup>-2</sup></b> | 7.99 × 10 <sup>-3</sup> | 1.49 × 10 <sup>-2</sup> | <b>1.14 × 10<sup>-4</sup></b>              |
| <b>1.29 × 10<sup>-1</sup></b> | 1.33 × 10 <sup>-2</sup> | 2.61 × 10 <sup>-2</sup> | <b>1.74 × 10<sup>-4</sup></b>              |
| <b>1.69 × 10<sup>-1</sup></b> | 1.60 × 10 <sup>-2</sup> | 2.98 × 10 <sup>-2</sup> | <b>2.39 × 10<sup>-4</sup></b>              |

$$k_2 = 1.66 \times 10^{-3} \text{ M}^{-1} \text{ s}^{-1}$$

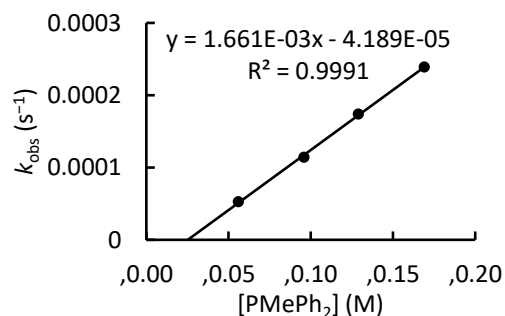

Kinetics of the reactions of ethyl acrylate (**1**) with  $\text{PMe}_2\text{Ph}$  in  $\text{CD}_2\text{Cl}_2$  (at 20 °C)

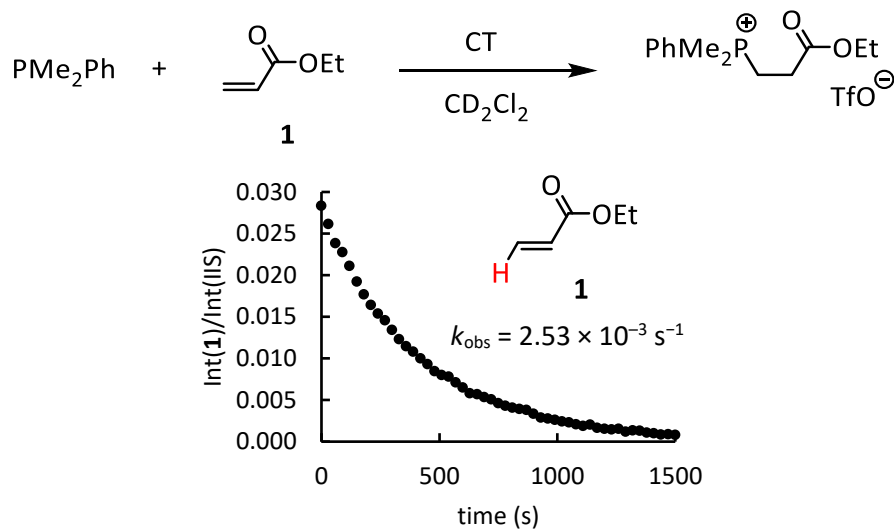

**Table S10.** Kinetics of the reaction of  $\text{PMe}_2\text{Ph}$  and **1** (proton source: CT,  $^1\text{H}$  NMR method, monitoring of the decreasing  $^1\text{H}$  NMR signal of **1** at 5.80 ppm, in  $\text{CD}_2\text{Cl}_2$ , mesitylene as internal integration standard IIS)

| $[\text{PMe}_2\text{Ph}]$ (M) | <b>1</b> (M)          | [CT] (M)              | $k_{\text{obs}}$ ( $\text{s}^{-1}$ ) |
|-------------------------------|-----------------------|-----------------------|--------------------------------------|
| $9.36 \times 10^{-2}$         | $9.79 \times 10^{-3}$ | $2.14 \times 10^{-2}$ | $1.87 \times 10^{-3}$                |
| $1.26 \times 10^{-1}$         | $1.27 \times 10^{-2}$ | $2.14 \times 10^{-2}$ | $2.53 \times 10^{-3}$                |
| $1.61 \times 10^{-1}$         | $1.66 \times 10^{-2}$ | $2.14 \times 10^{-2}$ | $3.22 \times 10^{-3}$                |
| $1.94 \times 10^{-1}$         | $1.86 \times 10^{-2}$ | $2.14 \times 10^{-2}$ | $3.88 \times 10^{-3}$                |
| $1.26 \times 10^{-1}$         | $1.26 \times 10^{-2}$ | $3.71 \times 10^{-2}$ | $2.47 \times 10^{-3}$                |
| $1.26 \times 10^{-1}$         | $1.26 \times 10^{-2}$ | $7.33 \times 10^{-2}$ | $2.55 \times 10^{-3}$                |

$k_2 = 2.00 \times 10^{-2} \text{ M}^{-1} \text{ s}^{-1}$

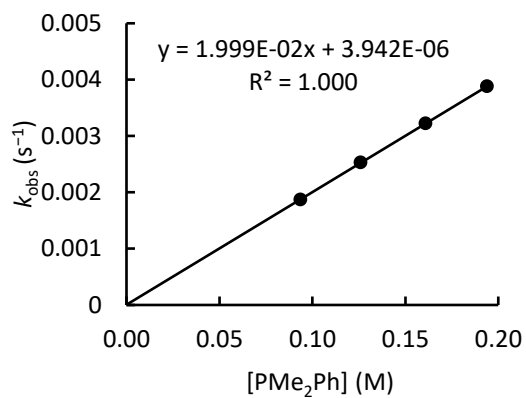

Kinetics of the reactions of ethyl acrylate (**1**) with PBU<sub>3</sub> in CH<sub>2</sub>Cl<sub>2</sub> (at 20 °C)

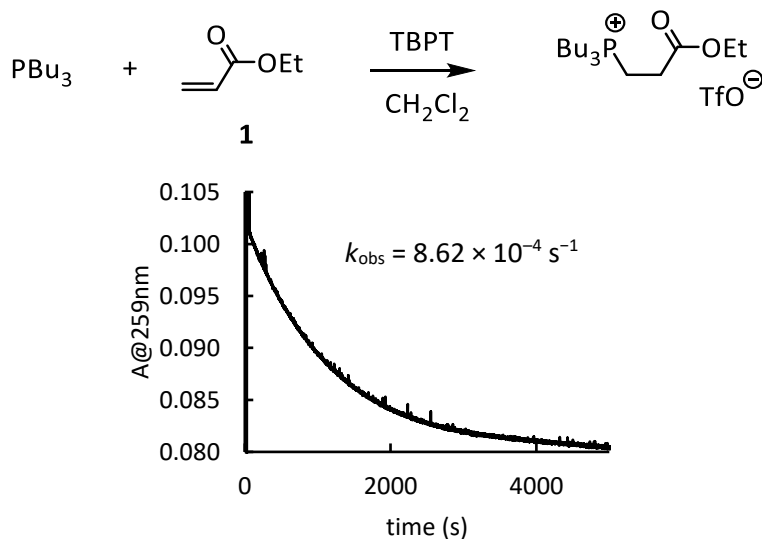

**Table S11.** Kinetics of the reactions of PBU<sub>3</sub> and **1** (proton source: TBPT, conventional UV-Vis method, detection at 259 nm, in CH<sub>2</sub>Cl<sub>2</sub>)

| [PBU <sub>3</sub> ] (M)       | [ <b>1</b> ] (M)        | [TBPT] (M)              | $k_{\text{obs}}$ (s <sup>-1</sup> ) |
|-------------------------------|-------------------------|-------------------------|-------------------------------------|
| <b>1.10 × 10<sup>-2</sup></b> | 1.16 × 10 <sup>-3</sup> | 2.44 × 10 <sup>-3</sup> | <b>8.62 × 10<sup>-4</sup></b>       |
| <b>1.64 × 10<sup>-2</sup></b> | 1.16 × 10 <sup>-3</sup> | 2.44 × 10 <sup>-3</sup> | <b>1.15 × 10<sup>-3</sup></b>       |
| <b>2.20 × 10<sup>-2</sup></b> | 1.16 × 10 <sup>-3</sup> | 2.45 × 10 <sup>-3</sup> | <b>1.48 × 10<sup>-3</sup></b>       |
| <b>2.75 × 10<sup>-2</sup></b> | 1.34 × 10 <sup>-3</sup> | 2.80 × 10 <sup>-3</sup> | <b>1.83 × 10<sup>-3</sup></b>       |
| <b>3.27 × 10<sup>-2</sup></b> | 1.15 × 10 <sup>-3</sup> | 2.43 × 10 <sup>-3</sup> | <b>2.11 × 10<sup>-3</sup></b>       |
| 3.27 × 10 <sup>-2</sup>       | 1.19 × 10 <sup>-3</sup> | 3.72 × 10 <sup>-3</sup> | 2.07 × 10 <sup>-3</sup>             |

$k_2 = 5.83 \times 10^{-2} \text{ M}^{-1} \text{ s}^{-1}$

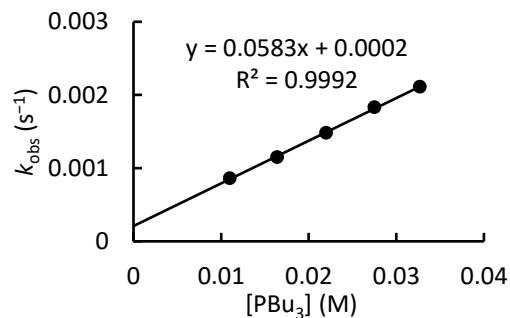

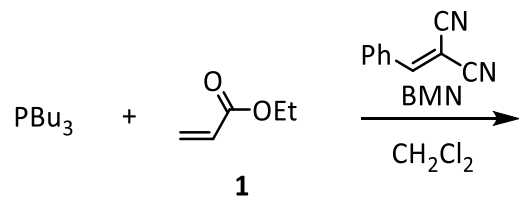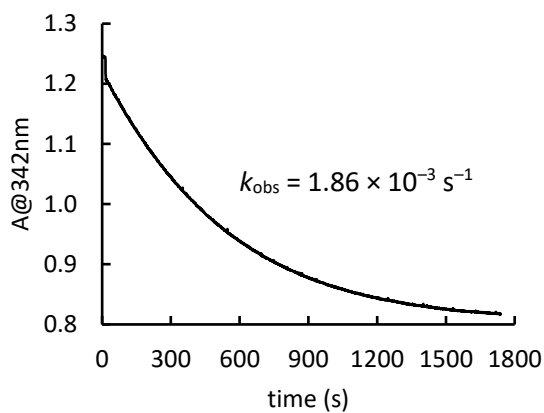

**Table S12.** Kinetics of the reactions of  $\text{PBU}_3$  and **1** (with electrophile BMN as trapping reagent, conventional UV-Vis method, detection at 342 nm, in  $\text{CH}_2\text{Cl}_2$ )

| $[\text{PBU}_3]$ (M)  | <b>1</b> (M)                            | [BMN] (M)             | $k_{\text{obs}}$ ( $\text{s}^{-1}$ )    |
|-----------------------|-----------------------------------------|-----------------------|-----------------------------------------|
| $5.35 \times 10^{-4}$ | <b><math>1.13 \times 10^{-2}</math></b> | $1.12 \times 10^{-3}$ | <b><math>6.39 \times 10^{-4}</math></b> |
| $5.20 \times 10^{-4}$ | <b><math>1.88 \times 10^{-2}</math></b> | $1.09 \times 10^{-3}$ | <b><math>1.10 \times 10^{-3}</math></b> |
| $5.41 \times 10^{-4}$ | <b><math>2.50 \times 10^{-2}</math></b> | $1.11 \times 10^{-3}$ | <b><math>1.34 \times 10^{-3}</math></b> |
| $5.38 \times 10^{-4}$ | <b><math>3.31 \times 10^{-2}</math></b> | $1.10 \times 10^{-3}$ | <b><math>1.86 \times 10^{-3}</math></b> |

$$k_2 = 5.47 \times 10^{-2} \text{ M}^{-1} \text{ s}^{-1}$$

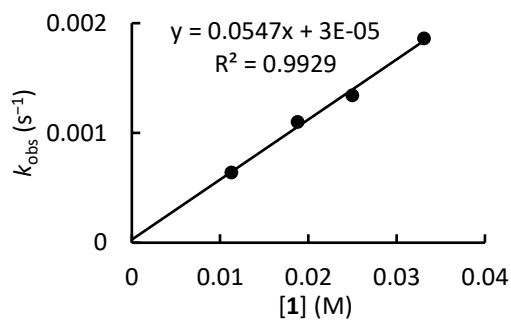









Kinetics of the reactions of ethyl acrylate (**1**) with P(1-Np)<sub>3</sub> in CD<sub>2</sub>Cl<sub>2</sub> (at 20 °C)

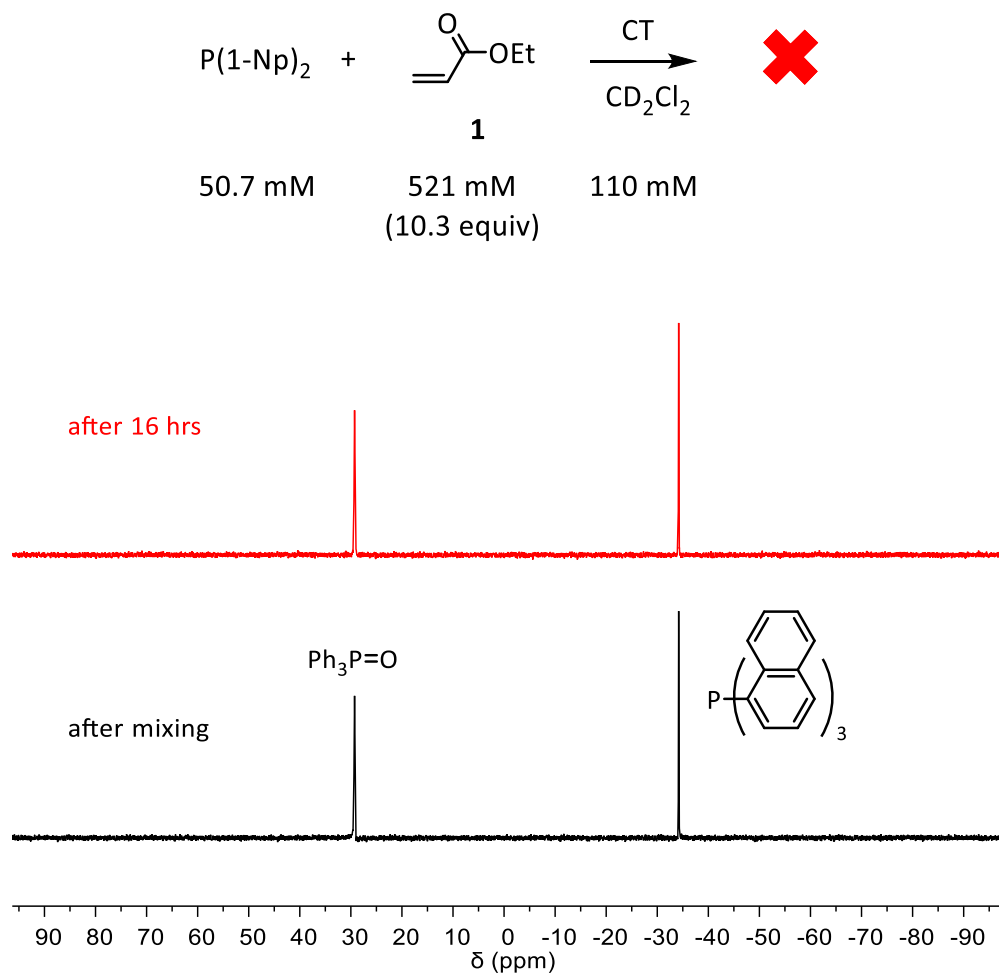

**Fig. S26.** <sup>31</sup>P NMR (162 MHz) spectra of the mixture of P(1-Np)<sub>3</sub> with **1** in CD<sub>2</sub>Cl<sub>2</sub> (proton source: CT, Ph<sub>3</sub>PO as internal integration standard)

## 5.2.2 Kinetics of the reactions of ethyl 2,3-butadienoate (**2**) with PR<sub>3</sub>

Kinetics of the reactions of ethyl buta-2,3-dienoate (**2**) with P(pfp)<sub>3</sub> in CD<sub>2</sub>Cl<sub>2</sub> (at 20 °C)

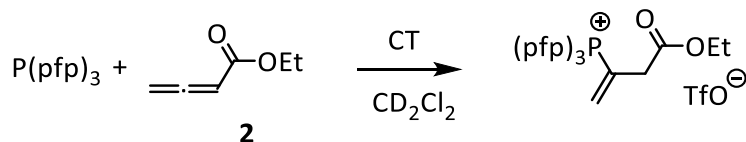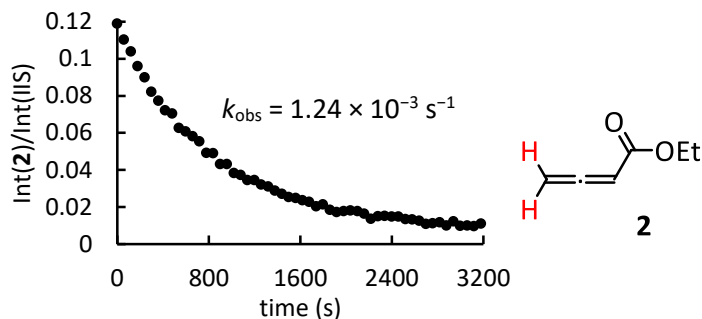

**Table S16.** Kinetics of the reaction of P(pfp)<sub>3</sub> and **2** (proton source: CT, <sup>1</sup>H NMR method, monitoring of the decreasing <sup>1</sup>H NMR signal of **2** at 5.21 ppm, in CD<sub>2</sub>Cl<sub>2</sub>, mesitylene as internal integration standard)

| [P(pfp) <sub>3</sub> ] (M)    | [ <b>2</b> ] (M)        | [CT] (M)                | <i>k</i> <sub>obs</sub> (s <sup>-1</sup> ) |
|-------------------------------|-------------------------|-------------------------|--------------------------------------------|
| <b>1.34 × 10<sup>-1</sup></b> | 1.36 × 10 <sup>-2</sup> | 2.82 × 10 <sup>-2</sup> | <b>4.67 × 10<sup>-4</sup></b>              |
| <b>1.97 × 10<sup>-1</sup></b> | 2.00 × 10 <sup>-2</sup> | 3.38 × 10 <sup>-2</sup> | <b>7.32 × 10<sup>-4</sup></b>              |
| <b>2.75 × 10<sup>-1</sup></b> | 2.00 × 10 <sup>-2</sup> | 3.38 × 10 <sup>-2</sup> | <b>9.70 × 10<sup>-4</sup></b>              |
| <b>3.56 × 10<sup>-1</sup></b> | 2.00 × 10 <sup>-2</sup> | 3.38 × 10 <sup>-2</sup> | <b>1.24 × 10<sup>-3</sup></b>              |

$k_2 = 3.43 \times 10^{-3} \text{ M}^{-1} \text{ s}^{-1}$

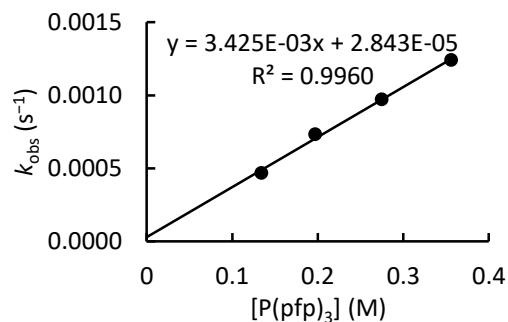

**Table S17.** Kinetics of the reaction of P(pfp)<sub>3</sub> and **2** (proton source: CT, <sup>31</sup>P NMR method, monitoring of the decreasing <sup>31</sup>P NMR signal of P(pfp)<sub>3</sub> at -9.2 ppm, in CD<sub>2</sub>Cl<sub>2</sub>, Ph<sub>3</sub>PO as internal integration standard)

| [P(pfp) <sub>3</sub> ] (M) | [ <b>2</b> ] (M)              | [CT] (M)                | <i>k</i> <sub>obs</sub> (s <sup>-1</sup> ) |
|----------------------------|-------------------------------|-------------------------|--------------------------------------------|
| 3.36 × 10 <sup>-2</sup>    | <b>3.21 × 10<sup>-1</sup></b> | 6.78 × 10 <sup>-2</sup> | 1.51 × 10 <sup>-3</sup>                    |
| 4.96 × 10 <sup>-2</sup>    | <b>4.87 × 10<sup>-1</sup></b> | 9.25 × 10 <sup>-2</sup> | 2.05 × 10 <sup>-3</sup>                    |
| 6.72 × 10 <sup>-2</sup>    | <b>6.57 × 10<sup>-1</sup></b> | 1.18 × 10 <sup>-2</sup> | 2.75 × 10 <sup>-3</sup>                    |
| 8.00 × 10 <sup>-2</sup>    | <b>8.23 × 10<sup>-1</sup></b> | 1.33 × 10 <sup>-2</sup> | 3.40 × 10 <sup>-3</sup>                    |

$k_2 = 3.80 \times 10^{-3} \text{ M}^{-1} \text{ s}^{-1}$

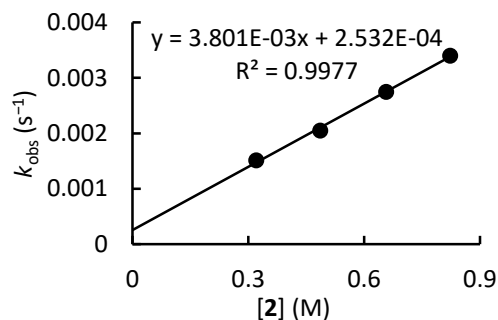

Kinetics of the reactions of ethyl buta-2,3-dienoate (**2**) with PPh<sub>3</sub> in CD<sub>2</sub>Cl<sub>2</sub> (at 20 °C)<sup>S6</sup>

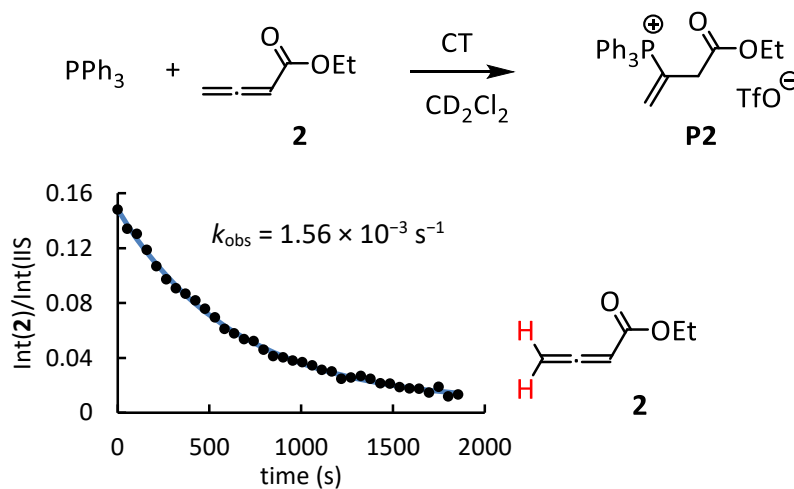

**Table S18.** Kinetics of the reactions of PPh<sub>3</sub> and **2** (proton source: CT, <sup>1</sup>H NMR method, monitoring of the decreasing signal for the =CH<sub>2</sub> group in **2** at 5.21 ppm, in CD<sub>2</sub>Cl<sub>2</sub>, mesitylene as internal integration standard)

| [PPh <sub>3</sub> ] (M) | [ <b>2</b> ] (M)      | [CT] (M)              | $k_{\text{obs}}$ (s <sup>-1</sup> ) |
|-------------------------|-----------------------|-----------------------|-------------------------------------|
| $1.75 \times 10^{-1}$   | $1.82 \times 10^{-2}$ | $3.71 \times 10^{-2}$ | $1.56 \times 10^{-3}$               |
| $2.34 \times 10^{-1}$   | $1.82 \times 10^{-2}$ | $3.71 \times 10^{-2}$ | $1.99 \times 10^{-3}$               |
| $2.90 \times 10^{-1}$   | $2.90 \times 10^{-2}$ | $5.93 \times 10^{-2}$ | $2.44 \times 10^{-3}$               |
| $3.48 \times 10^{-1}$   | $2.90 \times 10^{-2}$ | $5.93 \times 10^{-2}$ | $2.88 \times 10^{-3}$               |

$$k_2 = 7.67 \times 10^{-3} \text{ M}^{-1} \text{ s}^{-1} \text{ (from ref. S6)}$$

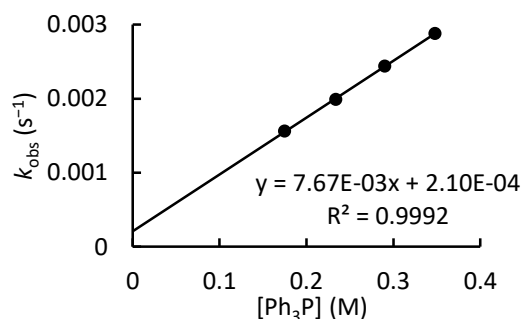

<sup>31</sup>P NMR spectroscopic analysis of selected samples indicated selective conversion of **2** to **P2** ( $\delta_{\text{P}} = +25.3$  ppm in CD<sub>2</sub>Cl<sub>2</sub>) under the conditions of the kinetic experiments (Figure S27).

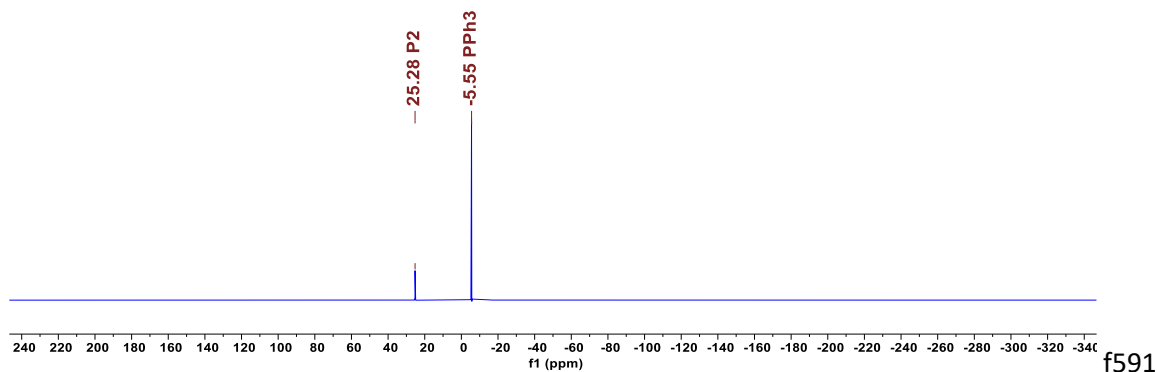

**Fig. S27.** <sup>31</sup>P NMR (162 MHz) spectrum of a sample with [Ph<sub>3</sub>P]<sub>0</sub> = 250 mM, [**2**]<sub>0</sub> = 18.7 mM and [CT]<sub>0</sub> = 40.6 mM in CD<sub>2</sub>Cl<sub>2</sub> after completion of their reaction.

Kinetics of the reactions of ethyl buta-2,3-dienoate (**2**) with P(ani)<sub>3</sub> in CH<sub>2</sub>Cl<sub>2</sub> (at 20 °C)

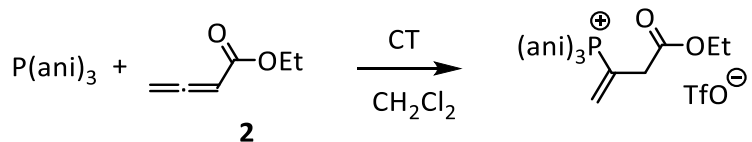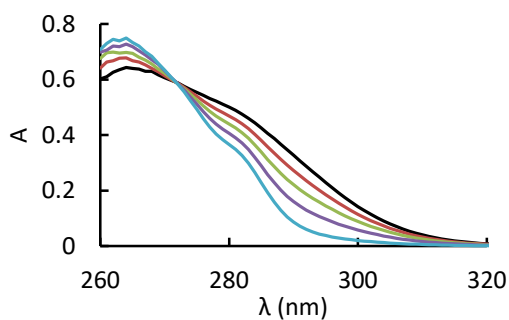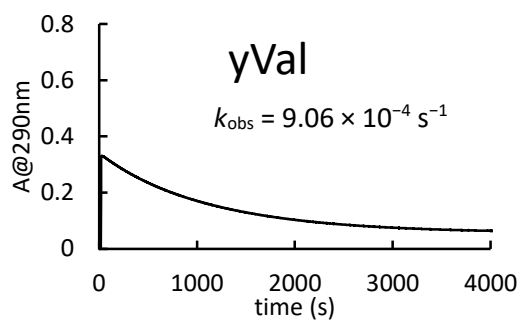

**Table S19.** Kinetics of the reactions of P(ani)<sub>3</sub> and **2** (proton source: CT, conventional UV-Vis method, detection at 290 nm, in CH<sub>2</sub>Cl<sub>2</sub>)

| [P(ani) <sub>3</sub> ] (M) | [ <b>2</b> ] (M)              | [CT] (M)                | <i>k</i> <sub>obs</sub> (s <sup>-1</sup> ) |
|----------------------------|-------------------------------|-------------------------|--------------------------------------------|
| 6.83 × 10 <sup>-5</sup>    | <b>1.18 × 10<sup>-2</sup></b> | 1.30 × 10 <sup>-4</sup> | <b>4.72 × 10<sup>-4</sup></b>              |
| 6.81 × 10 <sup>-5</sup>    | <b>1.81 × 10<sup>-2</sup></b> | 1.29 × 10 <sup>-4</sup> | <b>7.18 × 10<sup>-4</sup></b>              |
| 6.75 × 10 <sup>-5</sup>    | <b>2.31 × 10<sup>-2</sup></b> | 1.28 × 10 <sup>-4</sup> | <b>9.06 × 10<sup>-4</sup></b>              |
| 6.74 × 10 <sup>-5</sup>    | <b>2.93 × 10<sup>-2</sup></b> | 1.28 × 10 <sup>-4</sup> | <b>1.13 × 10<sup>-3</sup></b>              |

$k_2 = 3.76 \times 10^{-2} \text{ M}^{-1} \text{ s}^{-1}$

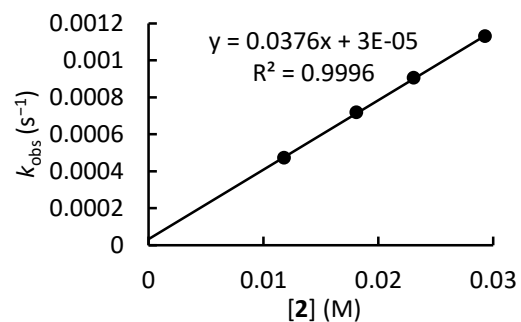

Kinetics of the reactions of ethyl buta-2,3-dienoate (**2**) with PMePh<sub>2</sub> in CH<sub>2</sub>Cl<sub>2</sub> (at 20 °C)

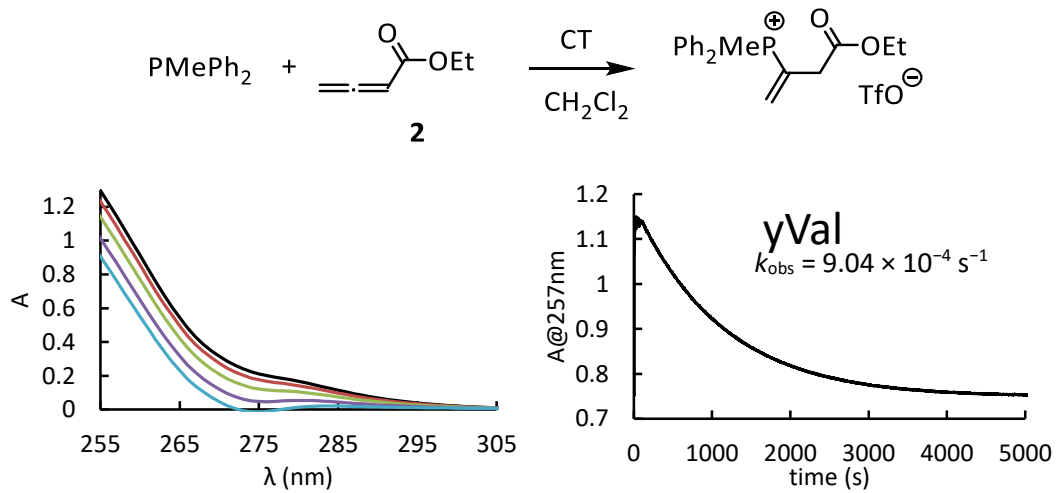

**Table S20.** Kinetics of the reactions of PMePh<sub>2</sub> and **2** (proton source: CT, conventional UV-Vis method, detection at 257 nm, in CH<sub>2</sub>Cl<sub>2</sub>)

| [PMePh <sub>2</sub> ] (M) | [ <b>2</b> ] (M)      | [CT] (M)              | $k_{\text{obs}}$ (s <sup>-1</sup> ) |
|---------------------------|-----------------------|-----------------------|-------------------------------------|
| $1.06 \times 10^{-4}$     | $1.33 \times 10^{-2}$ | $2.29 \times 10^{-4}$ | $9.04 \times 10^{-4}$               |
| $1.03 \times 10^{-4}$     | $1.57 \times 10^{-2}$ | $2.22 \times 10^{-4}$ | $1.10 \times 10^{-3}$               |
| $1.06 \times 10^{-4}$     | $1.99 \times 10^{-2}$ | $2.28 \times 10^{-4}$ | $1.37 \times 10^{-3}$               |
| $1.02 \times 10^{-4}$     | $2.32 \times 10^{-2}$ | $2.21 \times 10^{-4}$ | $1.51 \times 10^{-3}$               |

$$k_2 = 6.12 \times 10^{-2} \text{ M}^{-1} \text{ s}^{-1}$$

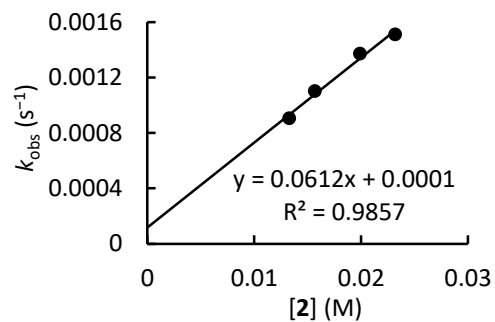

Kinetics of the reactions of ethyl buta-2,3-dienoate (**2**) with  $\text{PMe}_2\text{Ph}$  in  $\text{CH}_2\text{Cl}_2$  (at 20 °C)

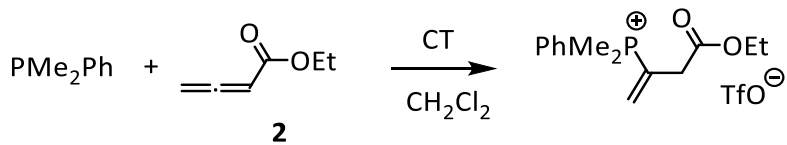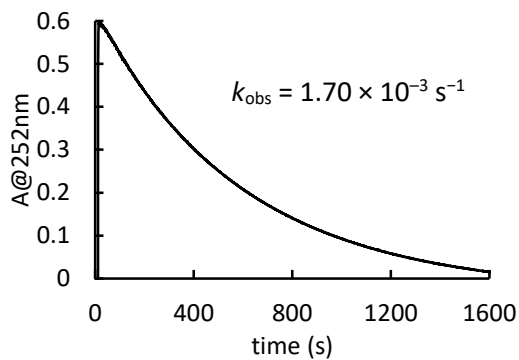

**Table S21.** Kinetics of the reactions of  $\text{PMe}_2\text{Ph}$  and **2** (proton source: CT, conventional UV-Vis method, detection at 252 nm, in  $\text{CH}_2\text{Cl}_2$ )

| $[\text{PMe}_2\text{Ph}]$ (M)                             | <b>[2]</b> (M)                          | [CT] (M)              | $k_{\text{obs}}$ ( $\text{s}^{-1}$ )    |
|-----------------------------------------------------------|-----------------------------------------|-----------------------|-----------------------------------------|
| $2.30 \times 10^{-4}$                                     | <b><math>5.30 \times 10^{-3}</math></b> | $2.55 \times 10^{-4}$ | <b><math>1.70 \times 10^{-3}</math></b> |
| $2.21 \times 10^{-4}$                                     | <b><math>7.16 \times 10^{-3}</math></b> | $2.52 \times 10^{-4}$ | <b><math>2.20 \times 10^{-3}</math></b> |
| $2.13 \times 10^{-4}$                                     | <b><math>8.74 \times 10^{-3}</math></b> | $2.44 \times 10^{-4}$ | <b><math>2.76 \times 10^{-3}</math></b> |
| $2.37 \times 10^{-4}$                                     | <b><math>1.13 \times 10^{-2}</math></b> | $2.63 \times 10^{-4}$ | <b><math>3.28 \times 10^{-3}</math></b> |
| $k_2 = 2.68 \times 10^{-1} \text{ M}^{-1} \text{ s}^{-1}$ |                                         |                       |                                         |

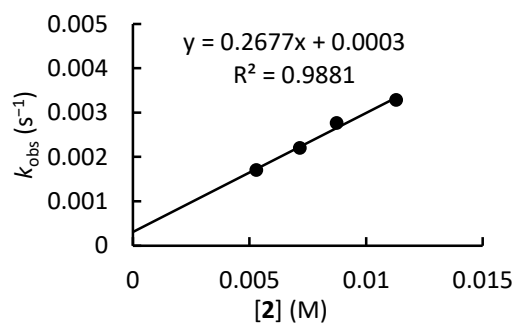

Kinetics of the reactions of ethyl buta-2,3-dienoate (**2**) with PBU<sub>3</sub> in CH<sub>2</sub>Cl<sub>2</sub> (at 20 °C)<sup>S6</sup>

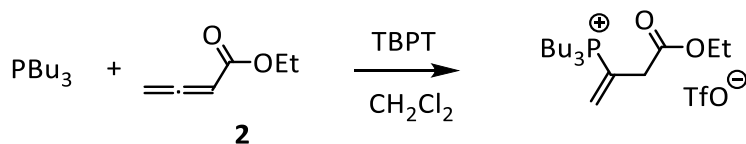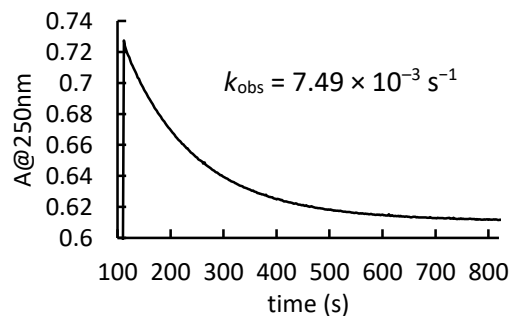

**Table S22.** Kinetics of the reactions of PBU<sub>3</sub> and **2** (proton source: TBPT, conventional UV-Vis method, detection at 250 nm, in CH<sub>2</sub>Cl<sub>2</sub>)

| [PBU <sub>3</sub> ] (M) | [ <b>2</b> ] (M)      | [TBPT] (M)            | $k_{\text{obs}}$ (s <sup>-1</sup> ) |
|-------------------------|-----------------------|-----------------------|-------------------------------------|
| $3.26 \times 10^{-3}$   | $3.38 \times 10^{-4}$ | $9.94 \times 10^{-4}$ | $1.73 \times 10^{-3}$               |
| $5.74 \times 10^{-3}$   | $5.95 \times 10^{-4}$ | $1.84 \times 10^{-3}$ | $3.34 \times 10^{-3}$               |
| $8.59 \times 10^{-3}$   | $8.98 \times 10^{-4}$ | $2.77 \times 10^{-3}$ | $5.03 \times 10^{-3}$               |
| $1.09 \times 10^{-2}$   | $8.83 \times 10^{-4}$ | $2.72 \times 10^{-3}$ | $6.59 \times 10^{-3}$               |
| $1.23 \times 10^{-2}$   | $1.21 \times 10^{-3}$ | $2.73 \times 10^{-3}$ | $7.49 \times 10^{-3}$               |

$$k_2 = 6.35 \times 10^{-1} \text{ M}^{-1} \text{ s}^{-1} \text{ (from ref. S6)}$$

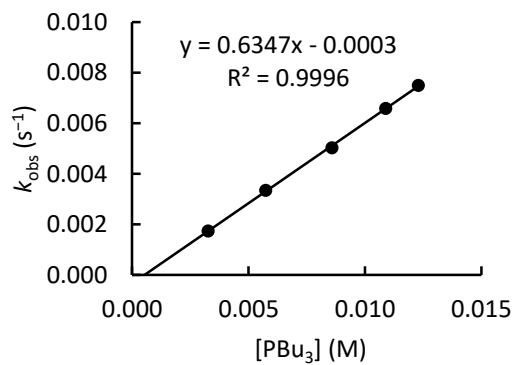

Kinetics of the reactions of ethyl buta-2,3-dienoate (**2**) with  $\text{PMe}_3$  in  $\text{CH}_2\text{Cl}_2$  (at 20 °C)

first mixer: generation of a known concentration of  $\text{PMe}_3$

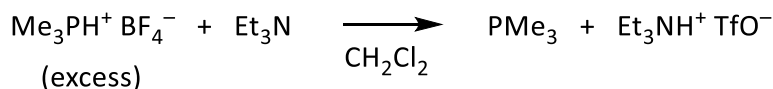

second step: reaction of  $\text{PMe}_3$  with **2**

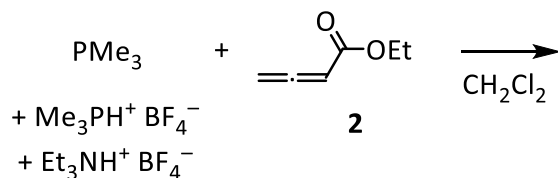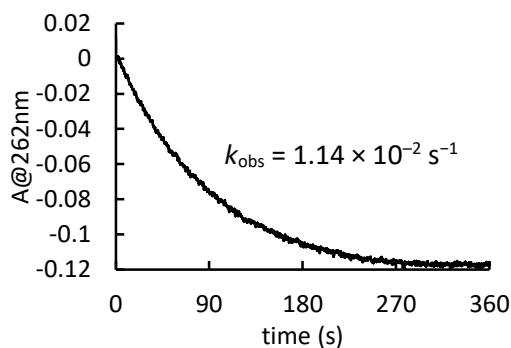

(A solution of electrophile **2** was recorded as the baseline ( $A_0 = 0$ ). Consumption of **2** then gave rise to negative absorption values.)

**Table S23.** Kinetics of the reactions of  $\text{PMe}_3$  and **2** ( $\text{PMe}_3$  was generated by the deprotonation of trimethylphosphonium tetrafluoroborate with  $\text{NEt}_3$  in the first step of the sequential mixing stopped-flow method, detection at 262 nm)

| $[\text{PMe}_3]$ (M)  | <b>[2]</b> (M)        | $[\text{HP}^+\text{Me}_3]$ (M) | $k_{\text{obs}}$ ( $\text{s}^{-1}$ ) |
|-----------------------|-----------------------|--------------------------------|--------------------------------------|
| $1.50 \times 10^{-2}$ | $1.52 \times 10^{-3}$ | $2.84 \times 10^{-3}$          | $1.14 \times 10^{-2}$                |
| $2.25 \times 10^{-2}$ | $1.52 \times 10^{-3}$ | $4.25 \times 10^{-3}$          | $1.77 \times 10^{-2}$                |
| $3.00 \times 10^{-2}$ | $1.52 \times 10^{-3}$ | $5.76 \times 10^{-3}$          | $2.59 \times 10^{-2}$                |
| $3.75 \times 10^{-2}$ | $1.52 \times 10^{-3}$ | $7.09 \times 10^{-3}$          | $3.29 \times 10^{-2}$                |

$$k_2 = 9.69 \times 10^{-1} \text{ M}^{-1} \text{ s}^{-1}$$

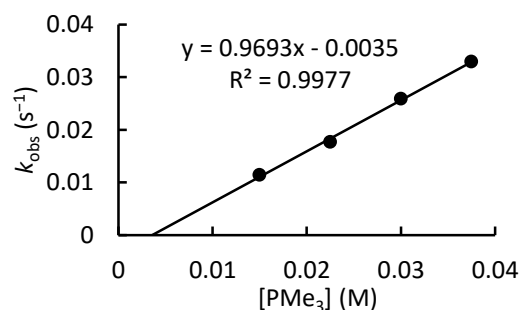



Kinetics of the reactions of ethyl buta-2,3-dienoate (**2**) with PCy<sub>3</sub> in CH<sub>2</sub>Cl<sub>2</sub> (at 20 °C)

first step: generation of a known concentration of PCy<sub>3</sub>

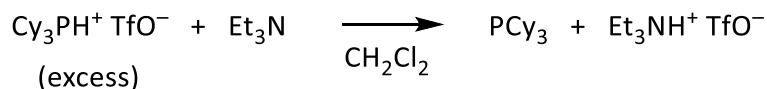

second step: reaction of PCy<sub>3</sub> with **2**

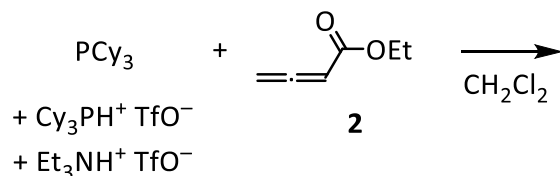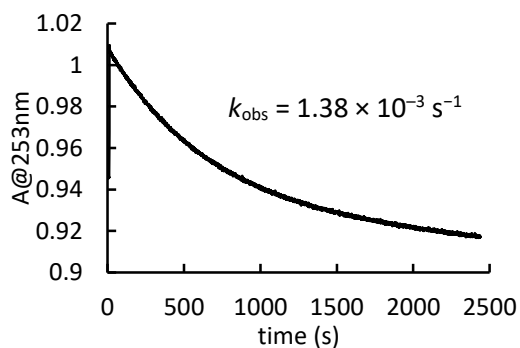

**Table S24.** Kinetics of the reactions of PCy<sub>3</sub> and **2** (in a first step PCy<sub>3</sub> was generated in CH<sub>2</sub>Cl<sub>2</sub> by the deprotonation of tricyclohexylphosphonium triflate with a known amount of NEt<sub>3</sub>, in a second step a solution of **2** in dichloromethane was added, conventional UV-Vis method, detection at 253 nm)

| [PCy <sub>3</sub> ] (M)       | [ <b>2</b> ] (M)        | [HP <sup>+</sup> Cy <sub>3</sub> ] (M) | <i>k</i> <sub>obs</sub> (s <sup>-1</sup> ) |
|-------------------------------|-------------------------|----------------------------------------|--------------------------------------------|
| <b>6.26 × 10<sup>-3</sup></b> | 6.32 × 10 <sup>-4</sup> | 1.26 × 10 <sup>-3</sup>                | <b>9.92 × 10<sup>-4</sup></b>              |
| <b>7.79 × 10<sup>-3</sup></b> | 7.55 × 10 <sup>-4</sup> | 1.57 × 10 <sup>-3</sup>                | <b>1.16 × 10<sup>-3</sup></b>              |
| <b>9.60 × 10<sup>-3</sup></b> | 8.66 × 10 <sup>-4</sup> | 1.85 × 10 <sup>-3</sup>                | <b>1.38 × 10<sup>-3</sup></b>              |
| <b>1.28 × 10<sup>-2</sup></b> | 8.07 × 10 <sup>-4</sup> | 1.70 × 10 <sup>-2</sup>                | <b>1.77 × 10<sup>-3</sup></b>              |

$$k_2 = 1.20 \times 10^{-1} \text{ M}^{-1} \text{ s}^{-1}$$

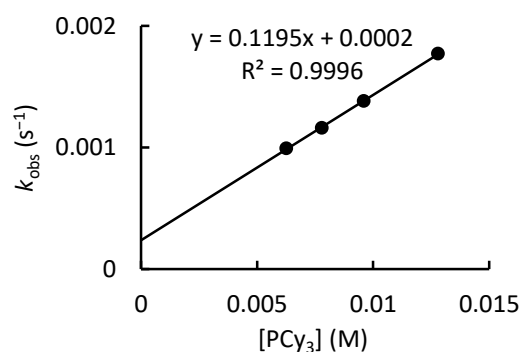

Kinetics of the reactions of ethyl buta-2,3-dienoate (**2**) with POct<sub>3</sub> in CH<sub>2</sub>Cl<sub>2</sub> (at 20 °C)

first step: generation of a known concentration of POct<sub>3</sub>

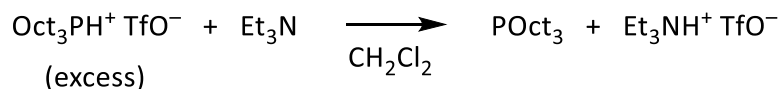

second step: reaction of POct<sub>3</sub> with **2**

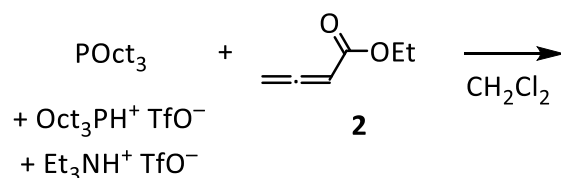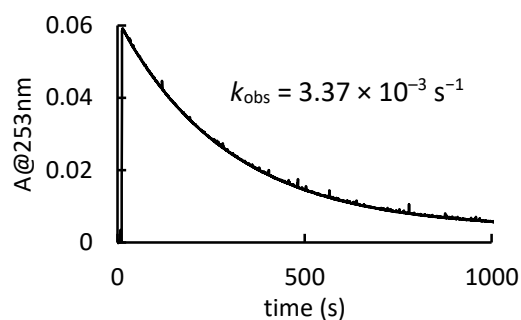

**Table S25.** Kinetics of the reactions of POct<sub>3</sub> and **2** (in a first step POct<sub>3</sub> was generated in CH<sub>2</sub>Cl<sub>2</sub> by the deprotonation of trioctylphosphonium triflate with a known amount of NEt<sub>3</sub>, in a second step a solution of **2** in dichloromethane was added, conventional UV-Vis method, detection at 253 nm)

| [POct <sub>3</sub> ] (M)                                                           | [ <b>2</b> ] (M)        | [HP <sup>+</sup> Oct <sub>3</sub> ] (M) | <i>k</i> <sub>obs</sub> (s <sup>-1</sup> ) |
|------------------------------------------------------------------------------------|-------------------------|-----------------------------------------|--------------------------------------------|
| <b>3.59 × 10<sup>-3</sup></b>                                                      | 3.36 × 10 <sup>-4</sup> | 8.48 × 10 <sup>-4</sup>                 | <b>2.06 × 10<sup>-3</sup></b>              |
| <b>4.30 × 10<sup>-3</sup></b>                                                      | 3.33 × 10 <sup>-4</sup> | 9.17 × 10 <sup>-4</sup>                 | <b>2.80 × 10<sup>-3</sup></b>              |
| <b>5.38 × 10<sup>-3</sup></b>                                                      | 5.22 × 10 <sup>-4</sup> | 1.27 × 10 <sup>-3</sup>                 | <b>3.37 × 10<sup>-3</sup></b>              |
| <b>7.78 × 10<sup>-3</sup></b>                                                      | 5.71 × 10 <sup>-4</sup> | 1.66 × 10 <sup>-2</sup>                 | <b>5.18 × 10<sup>-3</sup></b>              |
| <b><i>k</i><sub>2</sub> = 7.24 × 10<sup>-1</sup> M<sup>-1</sup> s<sup>-1</sup></b> |                         |                                         |                                            |

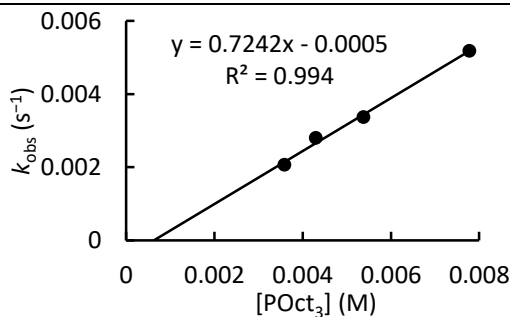

Kinetics of the reactions of ethyl buta-2,3-dienoate (**2**) with P(1-Np)<sub>3</sub> in CD<sub>2</sub>Cl<sub>2</sub> (at 20 °C)

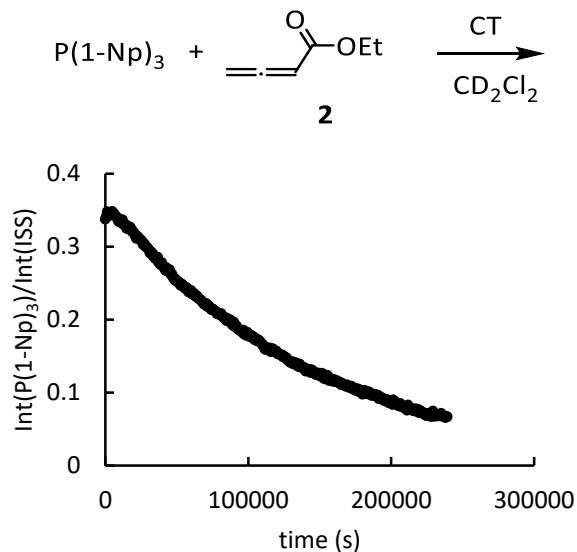

**Table S26.** Kinetics of the reaction of P(1-Np)<sub>3</sub> and **2** (proton source: CT, <sup>31</sup>P NMR method, monitoring of the decreasing <sup>31</sup>P NMR signal of P(1-Np)<sub>3</sub> at -34.1 ppm, in CD<sub>2</sub>Cl<sub>2</sub>, Ph<sub>3</sub>PO as internal integration standard)

| [P(1-Np) <sub>3</sub> ] (M)                                                        | [ <b>2</b> ] (M)              | [CT] (M)                | <i>k</i> <sub>obs</sub> (s <sup>-1</sup> ) |
|------------------------------------------------------------------------------------|-------------------------------|-------------------------|--------------------------------------------|
| 3.18 × 10 <sup>-2</sup>                                                            | <b>3.15 × 10<sup>-1</sup></b> | 7.96 × 10 <sup>-2</sup> | <b>2.50 × 10<sup>-6</sup></b>              |
| 3.93 × 10 <sup>-2</sup>                                                            | <b>5.12 × 10<sup>-1</sup></b> | 9.14 × 10 <sup>-2</sup> | <b>4.04 × 10<sup>-6</sup></b>              |
| 4.85 × 10 <sup>-2</sup>                                                            | <b>7.30 × 10<sup>-1</sup></b> | 1.54 × 10 <sup>-1</sup> | <b>5.90 × 10<sup>-6</sup></b>              |
| 4.52 × 10 <sup>-2</sup>                                                            | <b>9.08 × 10<sup>-1</sup></b> | 1.38 × 10 <sup>-2</sup> | <b>7.20 × 10<sup>-6</sup></b>              |
| <b><i>k</i><sub>2</sub> = 8.00 × 10<sup>-6</sup> M<sup>-1</sup> s<sup>-1</sup></b> |                               |                         |                                            |

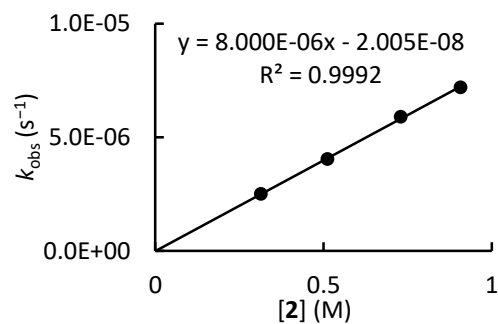

### 5.2.3 Kinetics of the reactions of ethyl propiolate (**3**) with PR<sub>3</sub>

Kinetics of the reactions of ethyl propiolate (**3**) with P(pfp)<sub>3</sub> in CD<sub>2</sub>Cl<sub>2</sub> (at 20 °C)

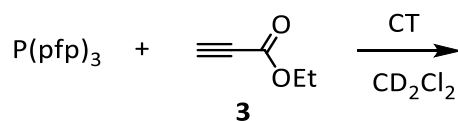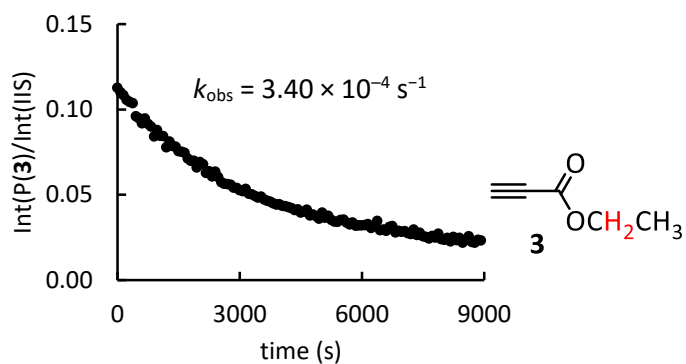

**Table S27.** Kinetics of the reaction of P(pfp)<sub>3</sub> and **3** (proton source: CT, <sup>1</sup>H NMR method, monitoring of the decreasing <sup>1</sup>H NMR signal of **3** at 4.23 ppm, in CD<sub>2</sub>Cl<sub>2</sub>, mesitylene as internal integration standard IIS)

| [P(pfp) <sub>3</sub> ] (M)                                                         | [ <b>3</b> ] (M)        | [CT] (M)                | <i>k</i> <sub>obs</sub> (s <sup>-1</sup> ) |
|------------------------------------------------------------------------------------|-------------------------|-------------------------|--------------------------------------------|
| <b>1.09 × 10<sup>-1</sup></b>                                                      | 1.05 × 10 <sup>-2</sup> | 2.07 × 10 <sup>-2</sup> | <b>3.40 × 10<sup>-4</sup></b>              |
| <b>1.64 × 10<sup>-1</sup></b>                                                      | 1.66 × 10 <sup>-2</sup> | 3.38 × 10 <sup>-2</sup> | <b>5.07 × 10<sup>-4</sup></b>              |
| <b>2.19 × 10<sup>-1</sup></b>                                                      | 1.92 × 10 <sup>-2</sup> | 3.98 × 10 <sup>-2</sup> | <b>6.75 × 10<sup>-4</sup></b>              |
| <b>2.76 × 10<sup>-1</sup></b>                                                      | 1.92 × 10 <sup>-2</sup> | 3.98 × 10 <sup>-2</sup> | <b>8.14 × 10<sup>-4</sup></b>              |
| <b><i>k</i><sub>2</sub> = 2.86 × 10<sup>-3</sup> M<sup>-1</sup> s<sup>-1</sup></b> |                         |                         |                                            |

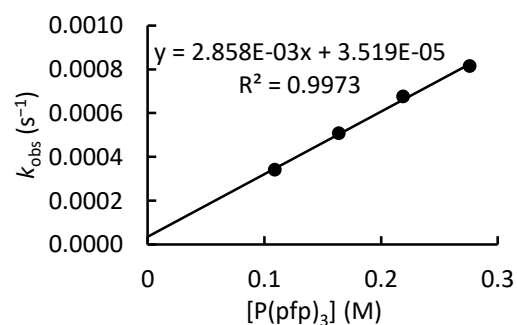

Kinetics of the reactions of ethyl propiolate (**3**) with PPh<sub>3</sub> in CD<sub>2</sub>Cl<sub>2</sub> (at 20 °C)

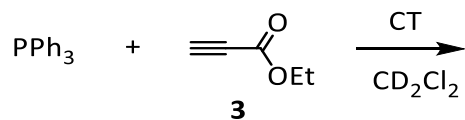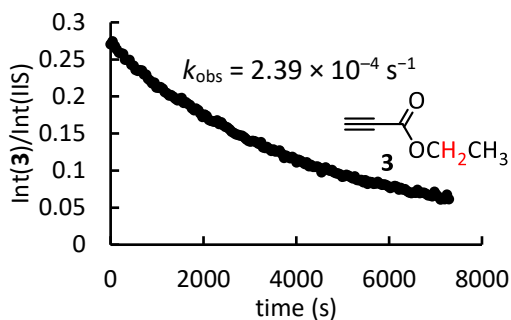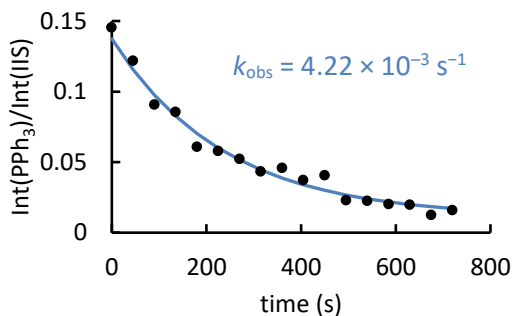

**Table S28.** Kinetics of the reaction of PPh<sub>3</sub> and **3** (proton source: CT, <sup>1</sup>H NMR method, monitoring of the decreasing <sup>1</sup>H NMR signal of **3** at 4.23 ppm, in CD<sub>2</sub>Cl<sub>2</sub>, mesitylene as internal integration standard IIS)

| [PPh <sub>3</sub> ] (M)       | [ <b>3</b> ] (M)        | [CT] (M)                | <i>k</i> <sub>obs</sub> (s <sup>-1</sup> ) |
|-------------------------------|-------------------------|-------------------------|--------------------------------------------|
| <b>2.55 × 10<sup>-2</sup></b> | 2.07 × 10 <sup>-3</sup> | 5.59 × 10 <sup>-3</sup> | <b>2.39 × 10<sup>-4</sup></b>              |
| <b>4.16 × 10<sup>-2</sup></b> | 3.45 × 10 <sup>-3</sup> | 9.31 × 10 <sup>-3</sup> | <b>4.09 × 10<sup>-4</sup></b>              |
| <b>5.91 × 10<sup>-2</sup></b> | 5.18 × 10 <sup>-3</sup> | 1.30 × 10 <sup>-3</sup> | <b>5.82 × 10<sup>-4</sup></b>              |
| <b>7.66 × 10<sup>-2</sup></b> | 6.90 × 10 <sup>-3</sup> | 1.86 × 10 <sup>-3</sup> | <b>7.72 × 10<sup>-4</sup></b>              |

$$k_2 = 1.04 \times 10^{-2} \text{ M}^{-1} \text{ s}^{-1}$$

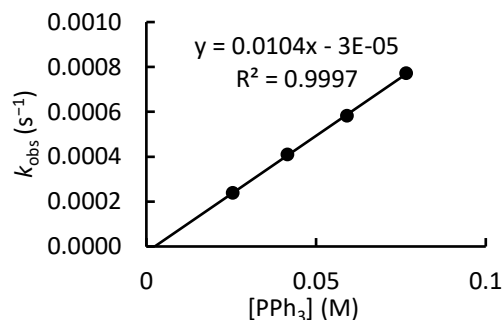

**Table S29.** Kinetics of the reaction of PPh<sub>3</sub> and **3** (proton source: CT, <sup>31</sup>P NMR method, monitoring of the decreasing <sup>31</sup>P NMR signal of PPh<sub>3</sub> at -5.5 ppm,<sup>S12</sup> in CD<sub>2</sub>Cl<sub>2</sub>, Ph<sub>3</sub>PO as internal integration standard IIS)

| [PPh <sub>3</sub> ] (M) | [ <b>3</b> ] (M)              | [CT] (M)                | <i>k</i> <sub>obs</sub> (s <sup>-1</sup> ) |
|-------------------------|-------------------------------|-------------------------|--------------------------------------------|
| 4.04 × 10 <sup>-2</sup> | <b>3.87 × 10<sup>-1</sup></b> | 8.59 × 10 <sup>-2</sup> | <b>2.63 × 10<sup>-3</sup></b>              |
| 5.16 × 10 <sup>-2</sup> | <b>5.18 × 10<sup>-1</sup></b> | 1.15 × 10 <sup>-1</sup> | <b>3.50 × 10<sup>-3</sup></b>              |
| 6.29 × 10 <sup>-2</sup> | <b>6.14 × 10<sup>-1</sup></b> | 1.36 × 10 <sup>-1</sup> | <b>4.22 × 10<sup>-3</sup></b>              |
| 7.41 × 10 <sup>-2</sup> | <b>7.33 × 10<sup>-1</sup></b> | 1.63 × 10 <sup>-1</sup> | <b>5.06 × 10<sup>-3</sup></b>              |

$$k_2 = 7.05 \times 10^{-3} \text{ M}^{-1} \text{ s}^{-1}$$

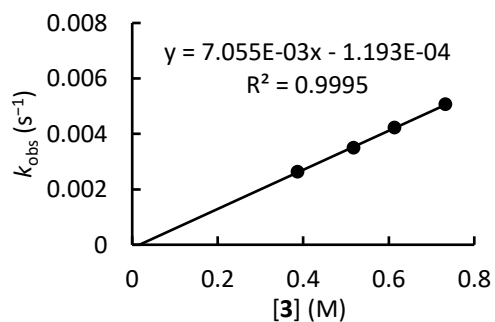

Kinetics of the reactions of ethyl propiolate (**3**) with P(ani)<sub>3</sub> in CH<sub>2</sub>Cl<sub>2</sub> (at 20 °C)

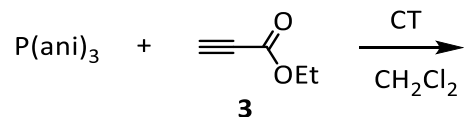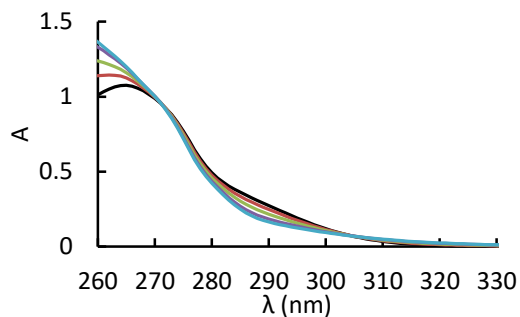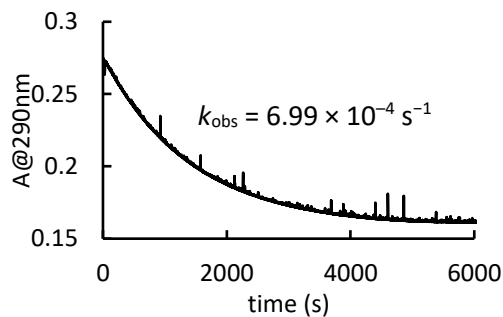

**Table S30.** Kinetics of the reactions of P(ani)<sub>3</sub> and **3** (proton source: CT, conventional UV-Vis method, detection at 290 nm, in CH<sub>2</sub>Cl<sub>2</sub>)

| [P(ani) <sub>3</sub> ] (M)                                                         | [ <b>3</b> ] (M)              | [CT] (M)                | <i>k</i> <sub>obs</sub> (s <sup>-1</sup> ) |
|------------------------------------------------------------------------------------|-------------------------------|-------------------------|--------------------------------------------|
| 5.95 × 10 <sup>-5</sup>                                                            | <b>1.34 × 10<sup>-2</sup></b> | 1.13 × 10 <sup>-4</sup> | <b>6.99 × 10<sup>-4</sup></b>              |
| 5.89 × 10 <sup>-5</sup>                                                            | <b>2.07 × 10<sup>-2</sup></b> | 1.12 × 10 <sup>-4</sup> | <b>1.03 × 10<sup>-3</sup></b>              |
| 5.95 × 10 <sup>-5</sup>                                                            | <b>2.57 × 10<sup>-2</sup></b> | 1.13 × 10 <sup>-4</sup> | <b>1.36 × 10<sup>-3</sup></b>              |
| 6.41 × 10 <sup>-5</sup>                                                            | <b>3.52 × 10<sup>-2</sup></b> | 1.22 × 10 <sup>-4</sup> | <b>1.87 × 10<sup>-3</sup></b>              |
| <b><i>k</i><sub>2</sub> = 5.45 × 10<sup>-2</sup> M<sup>-1</sup> s<sup>-1</sup></b> |                               |                         |                                            |

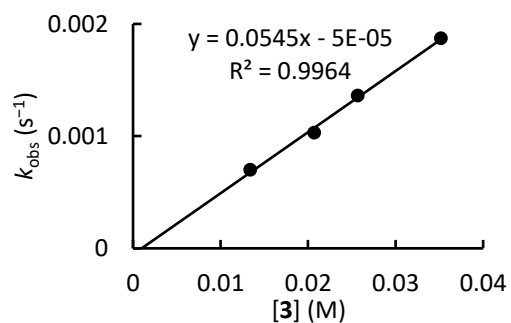

Kinetics of the reactions of ethyl propiolate (**3**) with PMePh<sub>2</sub> in CH<sub>2</sub>Cl<sub>2</sub> (at 20 °C)

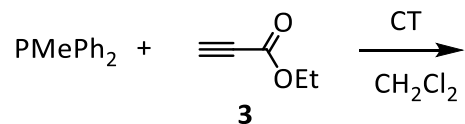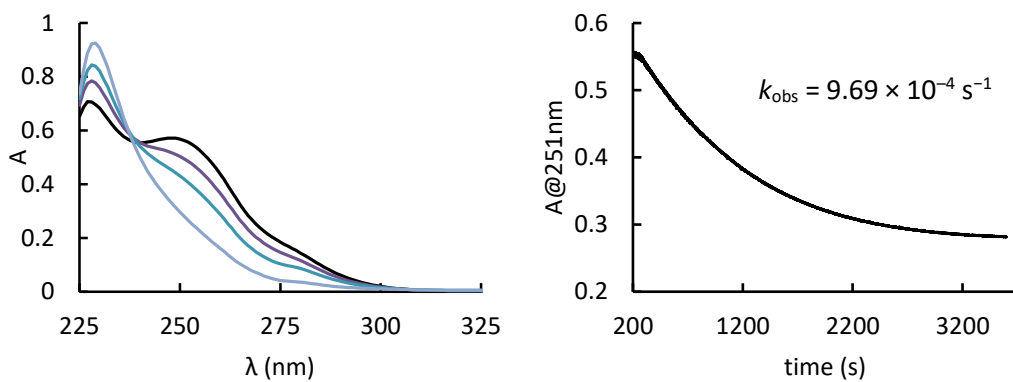

**Table S31.** Kinetics of the reactions of PMePh<sub>2</sub> and **3** (proton source: CT, conventional UV-Vis method, detection at 251 nm, in CH<sub>2</sub>Cl<sub>2</sub>)

| [PMePh <sub>2</sub> ] (M)                                                          | [ <b>3</b> ] (M)              | [CT] (M)                | <i>k</i> <sub>obs</sub> (s <sup>-1</sup> ) |
|------------------------------------------------------------------------------------|-------------------------------|-------------------------|--------------------------------------------|
| 1.11 × 10 <sup>-4</sup>                                                            | <b>1.16 × 10<sup>-2</sup></b> | 1.44 × 10 <sup>-4</sup> | <b>6.79 × 10<sup>-4</sup></b>              |
| 1.19 × 10 <sup>-4</sup>                                                            | <b>1.61 × 10<sup>-2</sup></b> | 2.36 × 10 <sup>-4</sup> | <b>9.69 × 10<sup>-4</sup></b>              |
| 1.07 × 10 <sup>-4</sup>                                                            | <b>1.98 × 10<sup>-2</sup></b> | 1.36 × 10 <sup>-4</sup> | <b>1.20 × 10<sup>-3</sup></b>              |
| 1.19 × 10 <sup>-4</sup>                                                            | <b>2.72 × 10<sup>-2</sup></b> | 2.16 × 10 <sup>-4</sup> | <b>1.66 × 10<sup>-3</sup></b>              |
| <b><i>k</i><sub>2</sub> = 6.28 × 10<sup>-2</sup> M<sup>-1</sup> s<sup>-1</sup></b> |                               |                         |                                            |

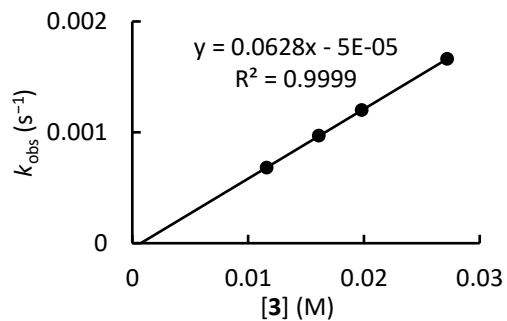

Kinetics of the reactions of ethyl propiolate (**3**) with  $\text{PMe}_2\text{Ph}$  in  $\text{CH}_2\text{Cl}_2$  (at 20 °C)

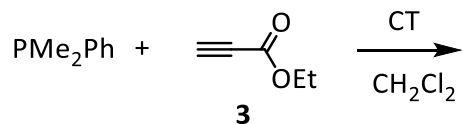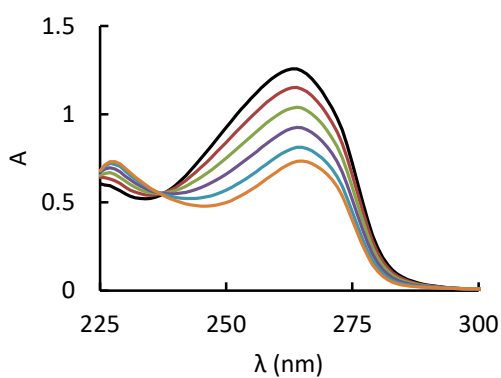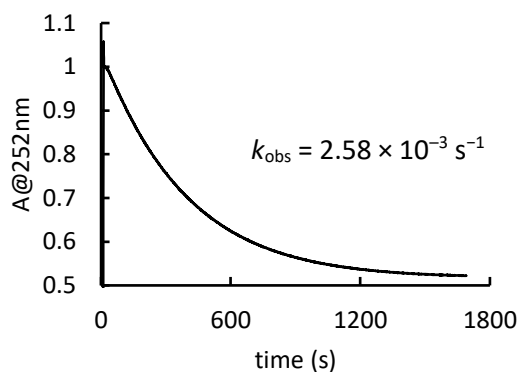

**Table S32.** Kinetics of the reactions of  $\text{PMe}_2\text{Ph}$  and **3** (proton source: CT, conventional UV-Vis method, detection at 252 nm, in  $\text{CH}_2\text{Cl}_2$ )

| $[\text{PMe}_2\text{Ph}]$ (M)                             | <b>[3]</b> (M)        | [CT] (M)              | $k_{\text{obs}}$ ( $\text{s}^{-1}$ ) |
|-----------------------------------------------------------|-----------------------|-----------------------|--------------------------------------|
| $2.09 \times 10^{-4}$                                     | $8.26 \times 10^{-3}$ | $2.32 \times 10^{-4}$ | $2.58 \times 10^{-3}$                |
| $2.02 \times 10^{-4}$                                     | $1.20 \times 10^{-2}$ | $2.25 \times 10^{-4}$ | $3.75 \times 10^{-3}$                |
| $2.08 \times 10^{-4}$                                     | $1.69 \times 10^{-2}$ | $2.30 \times 10^{-4}$ | $5.09 \times 10^{-3}$                |
| $2.06 \times 10^{-4}$                                     | $2.52 \times 10^{-2}$ | $2.29 \times 10^{-4}$ | $7.55 \times 10^{-3}$                |
| $k_2 = 2.92 \times 10^{-1} \text{ M}^{-1} \text{ s}^{-1}$ |                       |                       |                                      |

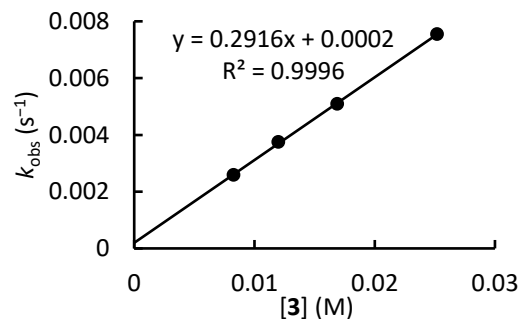



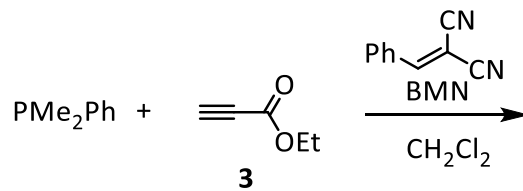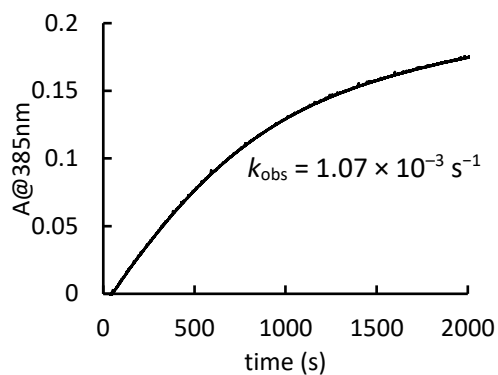

**Table S33.** Kinetics of the reactions of  $\text{PMe}_2\text{Ph}$  and **3** (with BMN as trapping reagent, conventional UV-Vis method, detection at 385 nm, in  $\text{CH}_2\text{Cl}_2$ )

| $[\text{PMe}_2\text{Ph}] \text{ (M)}$                     | <b>[3]</b> (M)                          | [6] (M)               | $k_{\text{obs}} \text{ (s}^{-1}\text{)}$ |
|-----------------------------------------------------------|-----------------------------------------|-----------------------|------------------------------------------|
| $3.11 \times 10^{-4}$                                     | <b><math>4.72 \times 10^{-3}</math></b> | $1.25 \times 10^{-3}$ | <b><math>1.07 \times 10^{-3}</math></b>  |
| $3.24 \times 10^{-4}$                                     | <b><math>7.68 \times 10^{-3}</math></b> | $1.58 \times 10^{-3}$ | <b><math>1.80 \times 10^{-3}</math></b>  |
| $3.03 \times 10^{-4}$                                     | <b><math>8.89 \times 10^{-3}</math></b> | $1.21 \times 10^{-3}$ | <b><math>2.12 \times 10^{-3}</math></b>  |
| $3.19 \times 10^{-4}$                                     | <b><math>1.20 \times 10^{-2}</math></b> | $1.56 \times 10^{-3}$ | <b><math>2.94 \times 10^{-3}</math></b>  |
| $k_2 = 2.57 \times 10^{-1} \text{ M}^{-1} \text{ s}^{-1}$ |                                         |                       |                                          |

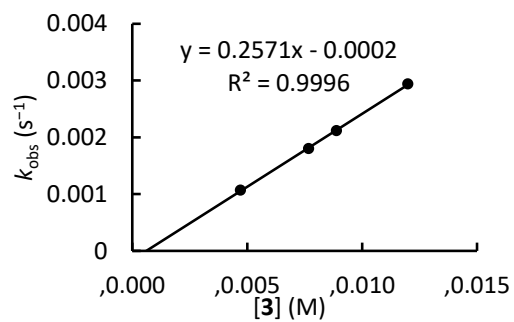

Kinetics of the reactions of ethyl propiolate (**3**) with PBU<sub>3</sub> in CH<sub>2</sub>Cl<sub>2</sub> (at 20 °C)

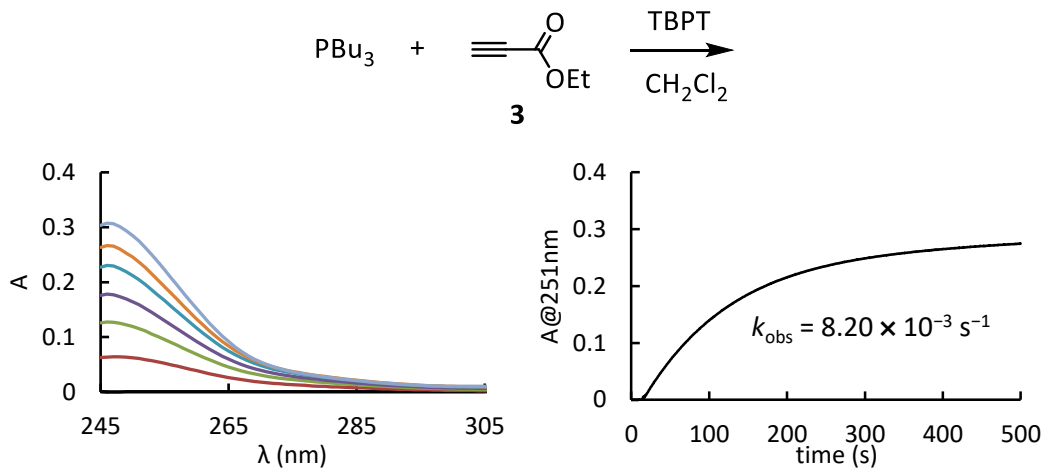

**Table S34.** Kinetics of the reactions of PBU<sub>3</sub> and **3** (proton source: TBPT, conventional UV-Vis method, detection at 251 nm, in CH<sub>2</sub>Cl<sub>2</sub>)

| [PBU <sub>3</sub> ] (M)                                                            | [ <b>3</b> ] (M)        | [TBPT] (M)              | <i>k</i> <sub>obs</sub> (s <sup>-1</sup> ) |
|------------------------------------------------------------------------------------|-------------------------|-------------------------|--------------------------------------------|
| <b>3.49 × 10<sup>-3</sup></b>                                                      | 5.23 × 10 <sup>-4</sup> | 1.45 × 10 <sup>-3</sup> | <b>3.81 × 10<sup>-3</sup></b>              |
| <b>4.59 × 10<sup>-3</sup></b>                                                      | 8.92 × 10 <sup>-4</sup> | 2.20 × 10 <sup>-3</sup> | <b>4.75 × 10<sup>-3</sup></b>              |
| <b>8.08 × 10<sup>-3</sup></b>                                                      | 8.19 × 10 <sup>-4</sup> | 1.97 × 10 <sup>-3</sup> | <b>8.20 × 10<sup>-3</sup></b>              |
| <b>1.10 × 10<sup>-2</sup></b>                                                      | 1.68 × 10 <sup>-3</sup> | 2.82 × 10 <sup>-3</sup> | <b>1.13 × 10<sup>-2</sup></b>              |
| <b>1.45 × 10<sup>-2</sup></b>                                                      | 1.43 × 10 <sup>-3</sup> | 3.33 × 10 <sup>-3</sup> | <b>1.42 × 10<sup>-2</sup></b>              |
| <b><i>k</i><sub>2</sub> = 9.61 × 10<sup>-1</sup> M<sup>-1</sup> s<sup>-1</sup></b> |                         |                         |                                            |

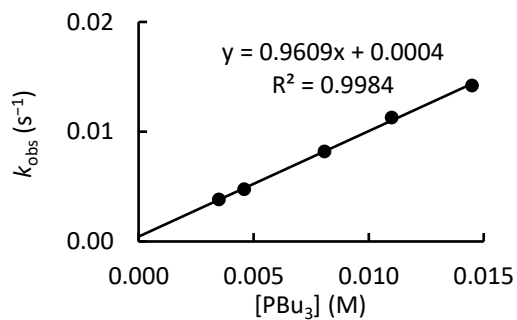

Kinetics of the reactions of ethyl propiolate (**3**) with  $\text{PMe}_3$  in  $\text{CH}_2\text{Cl}_2$  (at 20 °C)

first step: generation of a known concentration of  $\text{PMe}_3$

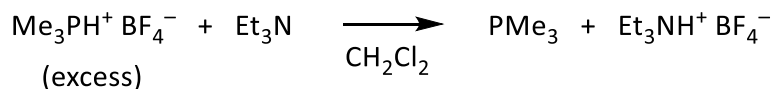

second step: reaction of  $\text{PMe}_3$  with **3**

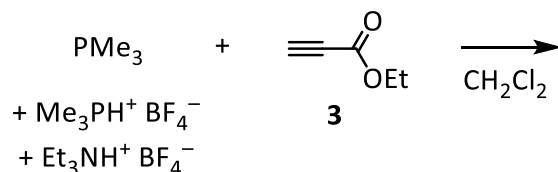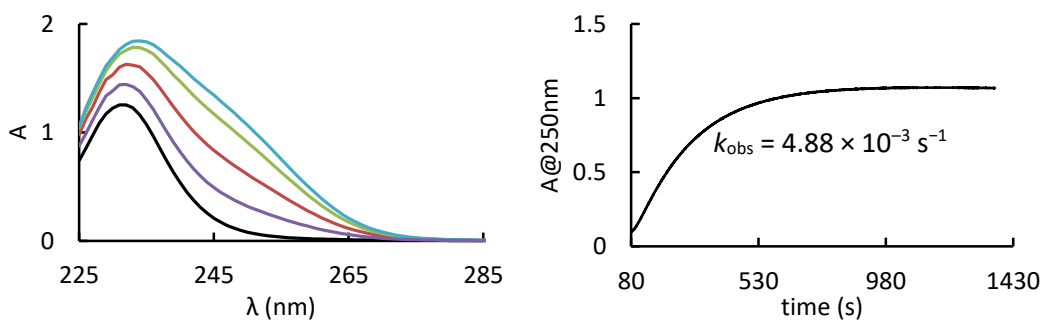

**Table S35.** Kinetics of the reactions of  $\text{PMe}_3$  and **3** (in a first step  $\text{PMe}_3$  was generated in  $\text{CH}_2\text{Cl}_2$  by the deprotonation of trimethylphosphonium tetrafluoroborate with a known amount of  $\text{NEt}_3$ , in a second step a solution of **3** in dichloromethane was added, conventional UV-Vis method, detection at 250 nm)

| $[\text{PMe}_3]$ (M)  | <b>3</b> (M)          | $[\text{HP}^+\text{Me}_3]$ (M) | $k_{\text{obs}}$ ( $\text{s}^{-1}$ ) |
|-----------------------|-----------------------|--------------------------------|--------------------------------------|
| $5.17 \times 10^{-3}$ | $5.16 \times 10^{-4}$ | $6.31 \times 10^{-4}$          | $4.88 \times 10^{-3}$                |
| $7.63 \times 10^{-3}$ | $7.93 \times 10^{-4}$ | $9.32 \times 10^{-4}$          | $7.15 \times 10^{-3}$                |
| $9.86 \times 10^{-3}$ | $1.08 \times 10^{-3}$ | $1.11 \times 10^{-3}$          | $9.53 \times 10^{-3}$                |
| $1.29 \times 10^{-2}$ | $1.43 \times 10^{-3}$ | $1.45 \times 10^{-3}$          | $1.22 \times 10^{-2}$                |

$k_2 = 9.56 \times 10^{-1} \text{ M}^{-1} \text{ s}^{-1}$

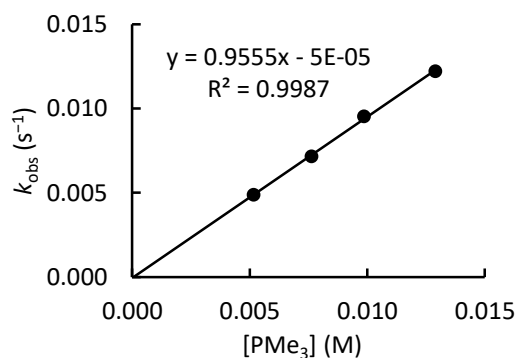

Kinetics of the reactions of ethyl propiolate (**3**) with PCy<sub>3</sub> in CH<sub>2</sub>Cl<sub>2</sub> (at 20 °C)

first step: generation of a known concentration of PCy<sub>3</sub>

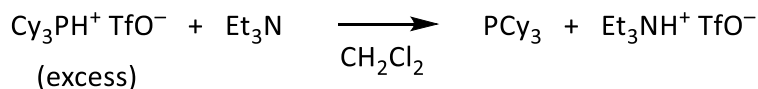

second step: reaction of PCy<sub>3</sub> with **3**

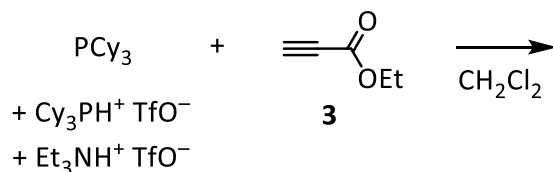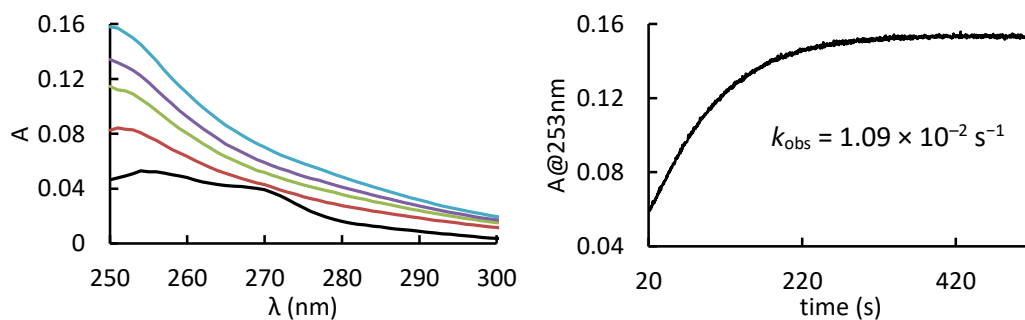

**Table S36.** Kinetics of the reactions of PCy<sub>3</sub> and **3** (in a first step PCy<sub>3</sub> was generated in CH<sub>2</sub>Cl<sub>2</sub> by the deprotonation of tricyclohexylphosphonium triflate with a known amount of NEt<sub>3</sub>, in a second step a solution of **3** in dichloromethane was added, conventional UV-Vis method, detection at 253 nm)

| [PCy <sub>3</sub> ] (M)                                          | [ <b>3</b> ] (M)        | [HP <sup>+</sup> Cy <sub>3</sub> ] (M) | <i>k</i> <sub>obs</sub> (s <sup>-1</sup> ) |
|------------------------------------------------------------------|-------------------------|----------------------------------------|--------------------------------------------|
| <b>3.86 × 10<sup>-3</sup></b>                                    | 3.90 × 10 <sup>-4</sup> | 4.62 × 10 <sup>-3</sup>                | <b>5.22 × 10<sup>-3</sup></b>              |
| <b>5.94 × 10<sup>-3</sup></b>                                    | 6.23 × 10 <sup>-4</sup> | 7.13 × 10 <sup>-3</sup>                | <b>8.17 × 10<sup>-3</sup></b>              |
| <b>7.68 × 10<sup>-3</sup></b>                                    | 7.84 × 10 <sup>-4</sup> | 1.08 × 10 <sup>-2</sup>                | <b>1.09 × 10<sup>-2</sup></b>              |
| <b>9.57 × 10<sup>-3</sup></b>                                    | 9.99 × 10 <sup>-4</sup> | 1.34 × 10 <sup>-2</sup>                | <b>1.33 × 10<sup>-2</sup></b>              |
| <b><i>k</i><sub>2</sub> = 1.43 M<sup>-1</sup> s<sup>-1</sup></b> |                         |                                        |                                            |

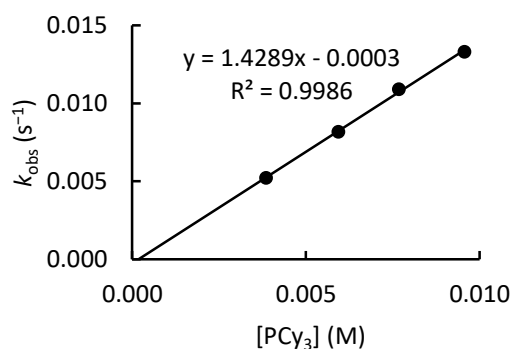

Kinetics of the reactions of ethyl propiolate (**3**) with POct<sub>3</sub> in CH<sub>2</sub>Cl<sub>2</sub> (at 20 °C)

first step: generation of a known concentration of POct<sub>3</sub>

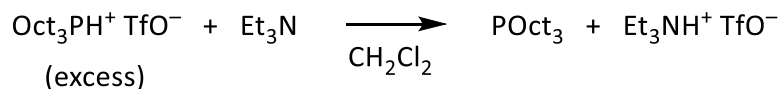

second step: reaction of POct<sub>3</sub> with **3**

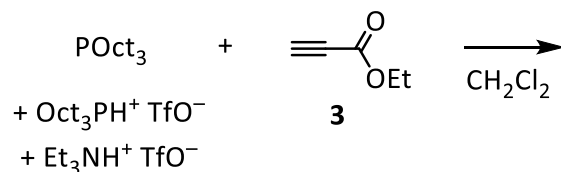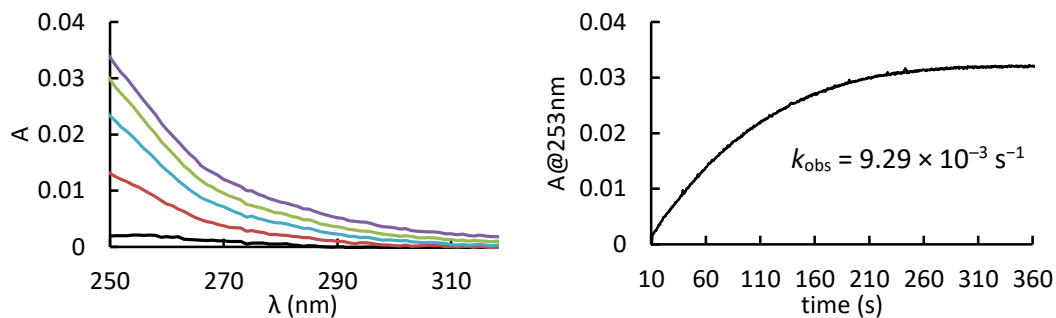

**Table S37.** Kinetics of the reactions of POct<sub>3</sub> and **3** (in a first step POct<sub>3</sub> was generated in CH<sub>2</sub>Cl<sub>2</sub> by the deprotonation of trioctylphosphonium triflate with a known amount of NEt<sub>3</sub>, in a second step a solution of **3** in dichloromethane was added, conventional UV-Vis method, detection at 253 nm)

| [POct <sub>3</sub> ] (M)      | [ <b>3</b> ] (M)        | [HP <sup>+</sup> Oct <sub>3</sub> ] (M) | <i>k</i> <sub>obs</sub> (s <sup>-1</sup> ) |
|-------------------------------|-------------------------|-----------------------------------------|--------------------------------------------|
| <b>2.62 × 10<sup>-3</sup></b> | 2.48 × 10 <sup>-4</sup> | 6.18 × 10 <sup>-4</sup>                 | <b>8.02 × 10<sup>-3</sup></b>              |
| <b>2.99 × 10<sup>-3</sup></b> | 2.92 × 10 <sup>-4</sup> | 4.00 × 10 <sup>-4</sup>                 | <b>9.29 × 10<sup>-3</sup></b>              |
| <b>4.41 × 10<sup>-3</sup></b> | 5.02 × 10 <sup>-4</sup> | 2.40 × 10 <sup>-3</sup>                 | <b>1.29 × 10<sup>-2</sup></b>              |
| <b>4.48 × 10<sup>-3</sup></b> | 4.59 × 10 <sup>-4</sup> | 5.99 × 10 <sup>-4</sup>                 | <b>1.33 × 10<sup>-2</sup></b>              |
| <b>5.52 × 10<sup>-3</sup></b> | 6.71 × 10 <sup>-4</sup> | 3.00 × 10 <sup>-3</sup>                 | <b>1.59 × 10<sup>-2</sup></b>              |

***k*<sub>2</sub> = 2.69 M<sup>-1</sup> s<sup>-1</sup>**

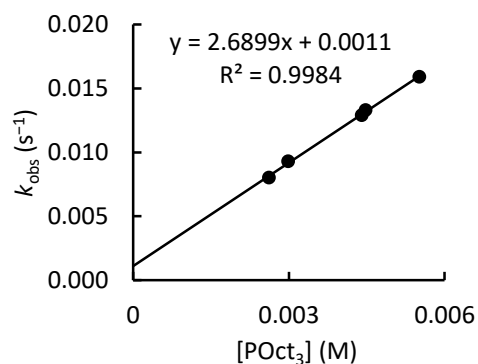

Kinetics of the reactions of ethyl propiolate (**3**) with P(1-Np)<sub>3</sub> in CD<sub>2</sub>Cl<sub>2</sub> (at 20 °C)

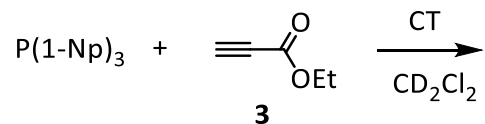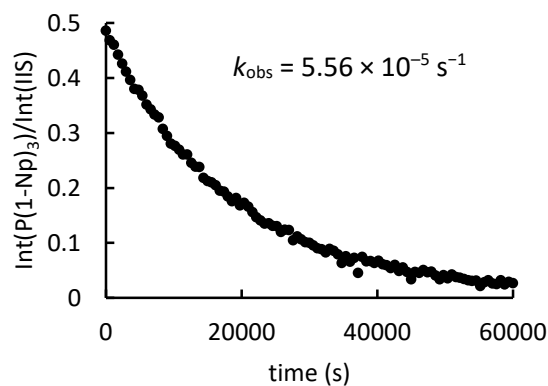

**Table S38.** Kinetics of the reaction of P(1-Np)<sub>3</sub> and **2** (proton source: CT, <sup>31</sup>P NMR method, monitoring of the decreasing <sup>31</sup>P NMR signal of P(1-Np)<sub>3</sub> at -34.1 ppm, in CD<sub>2</sub>Cl<sub>2</sub>, Ph<sub>3</sub>PO as internal integration standard, IIS)

| [P(1-Np) <sub>3</sub> ] (M) | [ <b>3</b> ] (M)              | [CT] (M)                | <i>k</i> <sub>obs</sub> (s <sup>-1</sup> ) |
|-----------------------------|-------------------------------|-------------------------|--------------------------------------------|
| 3.93 × 10 <sup>-2</sup>     | <b>7.14 × 10<sup>-1</sup></b> | 8.96 × 10 <sup>-2</sup> | <b>5.56 × 10<sup>-5</sup></b>              |
| 3.59 × 10 <sup>-2</sup>     | <b>1.35</b>                   | 8.44 × 10 <sup>-2</sup> | <b>1.11 × 10<sup>-4</sup></b>              |
| 3.42 × 10 <sup>-2</sup>     | <b>1.82</b>                   | 7.82 × 10 <sup>-2</sup> | <b>1.49 × 10<sup>-4</sup></b>              |
| 3.59 × 10 <sup>-2</sup>     | <b>2.19</b>                   | 8.59 × 10 <sup>-2</sup> | <b>1.81 × 10<sup>-4</sup></b>              |

***k*<sub>2</sub> = 8.46 × 10<sup>-5</sup> M<sup>-1</sup> s<sup>-1</sup>**

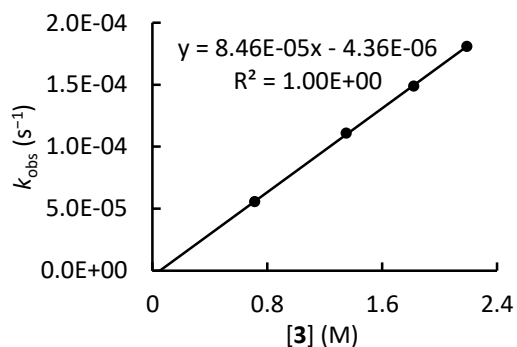

## 5.2.4 Kinetics of the reactions with ethenesulfonyl fluoride (ESF, **4**) with PR<sub>3</sub>

Kinetics of the reactions of ESF (**4**) with P(pfp)<sub>3</sub> in CH<sub>2</sub>Cl<sub>2</sub> (at 20 °C)

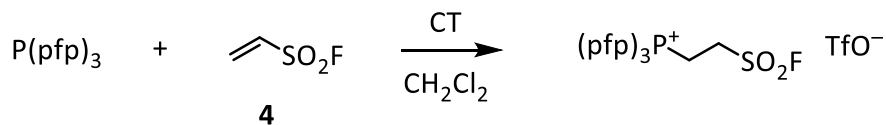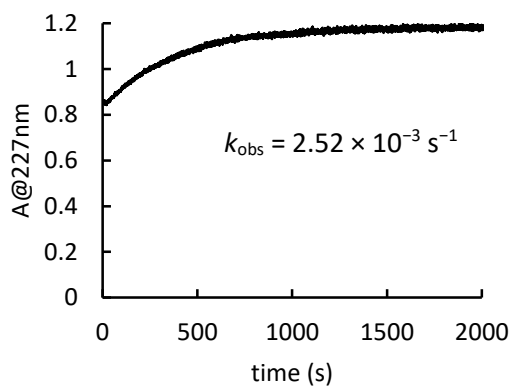

**Table S39.** Kinetics of the reactions of P(pfp)<sub>3</sub> and **4** (proton source: CT, conventional UV-Vis method, detection at 227 nm, in CH<sub>2</sub>Cl<sub>2</sub>)

| [P(pfp) <sub>3</sub> ] (M)                                | [CT] (M)              | [ <b>4</b> ] (M)      | $k_{\text{obs}}$ (s <sup>-1</sup> ) |
|-----------------------------------------------------------|-----------------------|-----------------------|-------------------------------------|
| $1.07 \times 10^{-4}$                                     | $2.61 \times 10^{-4}$ | $2.32 \times 10^{-3}$ | $1.74 \times 10^{-3}$               |
| $1.06 \times 10^{-4}$                                     | $2.59 \times 10^{-4}$ | $3.90 \times 10^{-3}$ | $2.52 \times 10^{-3}$               |
| $9.83 \times 10^{-5}$                                     | $2.66 \times 10^{-4}$ | $5.85 \times 10^{-3}$ | $3.17 \times 10^{-3}$               |
| $9.78 \times 10^{-5}$                                     | $2.65 \times 10^{-4}$ | $8.09 \times 10^{-3}$ | $4.24 \times 10^{-3}$               |
| $k_2 = 4.23 \times 10^{-1} \text{ M}^{-1} \text{ s}^{-1}$ |                       |                       |                                     |

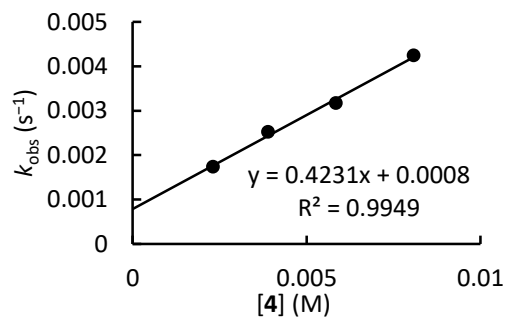

Kinetics of the reactions of ESF (**4**) with PPh<sub>3</sub> in CH<sub>2</sub>Cl<sub>2</sub> (at 20 °C)

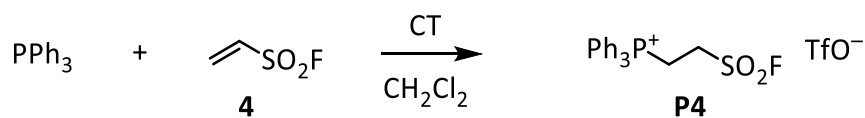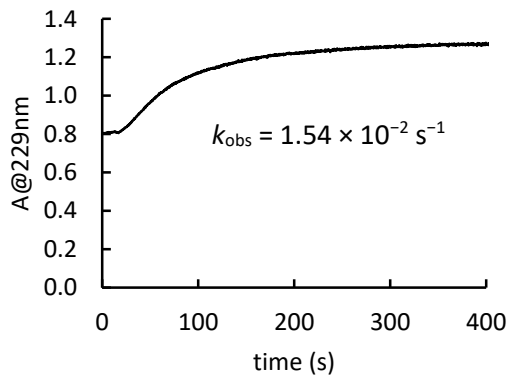

**Table S40.** Kinetics of the reactions of PPh<sub>3</sub> and **4** (proton source: CT, conventional UV-Vis method, detection at 229 nm, in CH<sub>2</sub>Cl<sub>2</sub>)

| [PPh <sub>3</sub> ] (M) | [CT] (M)                | [ <b>4</b> ] (M)        | <i>k</i> <sub>obs</sub> (s <sup>-1</sup> ) |
|-------------------------|-------------------------|-------------------------|--------------------------------------------|
| 1.37 × 10 <sup>-4</sup> | 3.48 × 10 <sup>-4</sup> | 1.66 × 10 <sup>-3</sup> | 7.48 × 10 <sup>-3</sup>                    |
| 1.36 × 10 <sup>-4</sup> | 3.44 × 10 <sup>-4</sup> | 2.46 × 10 <sup>-3</sup> | 1.02 × 10 <sup>-2</sup>                    |
| 1.11 × 10 <sup>-4</sup> | 2.81 × 10 <sup>-4</sup> | 2.70 × 10 <sup>-3</sup> | 1.13 × 10 <sup>-2</sup>                    |
| 1.07 × 10 <sup>-4</sup> | 2.75 × 10 <sup>-4</sup> | 3.24 × 10 <sup>-3</sup> | 1.29 × 10 <sup>-2</sup>                    |
| 1.06 × 10 <sup>-4</sup> | 2.72 × 10 <sup>-4</sup> | 4.00 × 10 <sup>-3</sup> | 1.54 × 10 <sup>-2</sup>                    |

$$k_2 = 3.38 \text{ M}^{-1} \text{ s}^{-1}$$

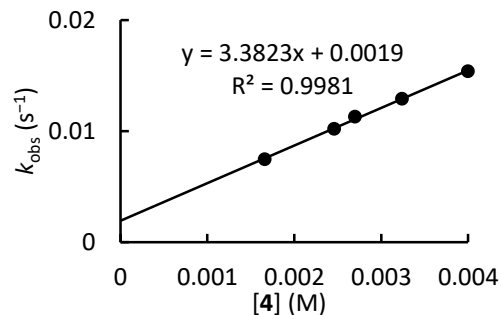

<sup>31</sup>P NMR spectroscopic analysis indicated selective conversion of **4** to **P4** (δ<sub>P</sub> = +23.5 ppm in CD<sub>2</sub>Cl<sub>2</sub>) under the conditions of the kinetic experiments (Figure S28).

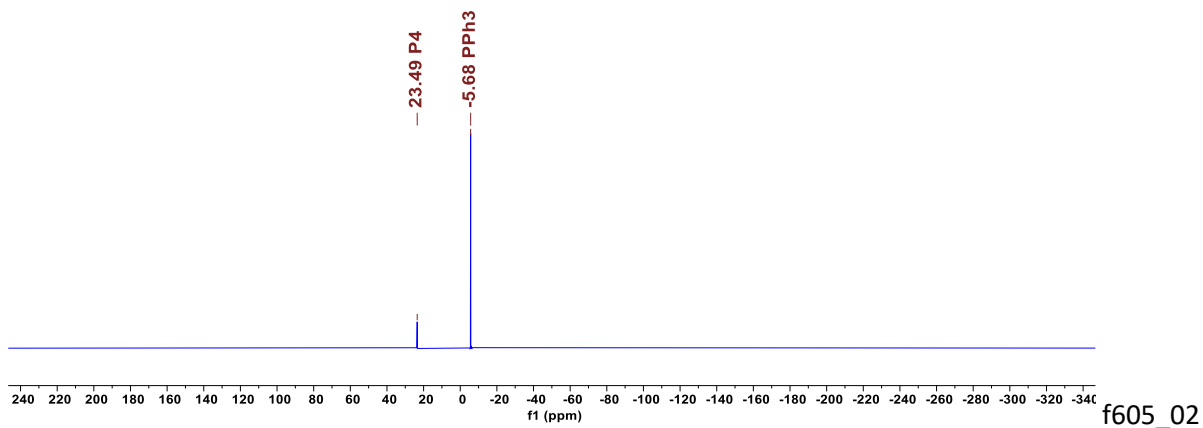

**Fig. S28.** <sup>31</sup>P NMR (162 MHz) spectrum of a sample with [Ph<sub>3</sub>P]<sub>0</sub> = 108 mM, [**4**]<sub>0</sub> = 10.8 mM and [CT]<sub>0</sub> = 22.3 mM in CD<sub>2</sub>Cl<sub>2</sub> after completion of their reaction.



Kinetics of the reactions of ESF (**4**) with PMePh<sub>2</sub> in CH<sub>2</sub>Cl<sub>2</sub> (at 20 °C)

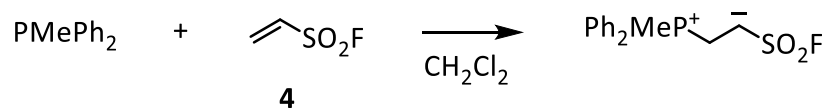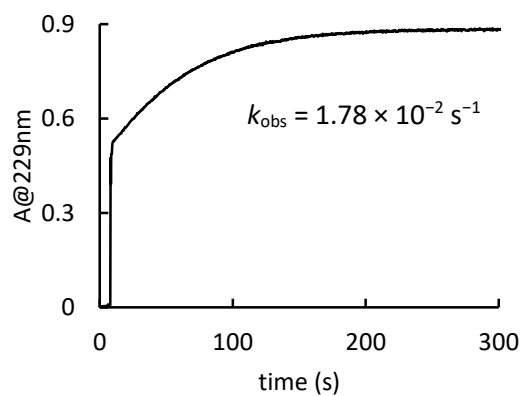

**Table S41.** Kinetics of the reactions of PMePh<sub>2</sub> and **4** (conventional UV-Vis method, detection at 229 nm, in CH<sub>2</sub>Cl<sub>2</sub>)

| [PMePh <sub>2</sub> ] (M) | [ <b>4</b> ] (M)      | $k_{\text{obs}}$ (s <sup>-1</sup> ) |
|---------------------------|-----------------------|-------------------------------------|
| $6.48 \times 10^{-5}$     | $6.65 \times 10^{-4}$ | $5.38 \times 10^{-3}$               |
| $1.13 \times 10^{-4}$     | $1.10 \times 10^{-3}$ | $8.27 \times 10^{-3}$               |
| $1.06 \times 10^{-4}$     | $1.64 \times 10^{-3}$ | $1.33 \times 10^{-2}$               |
| $1.06 \times 10^{-4}$     | $2.19 \times 10^{-3}$ | $1.78 \times 10^{-2}$               |
| $1.26 \times 10^{-4}$     | $2.69 \times 10^{-3}$ | $2.31 \times 10^{-2}$               |

$k_2 = 8.76 \text{ M}^{-1} \cdot \text{s}^{-1}$

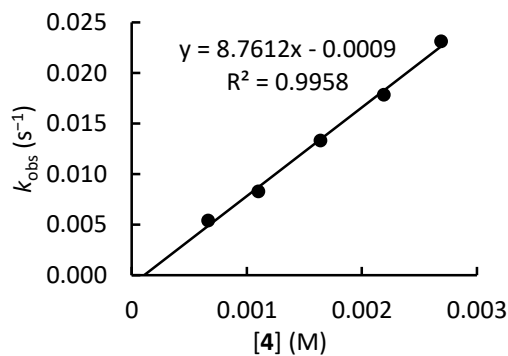

Kinetics of the reactions of ESF (**4**) with  $\text{PMe}_2\text{Ph}$  in  $\text{CH}_2\text{Cl}_2$  (at 20 °C)

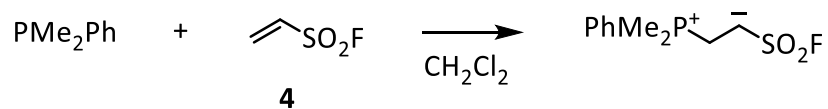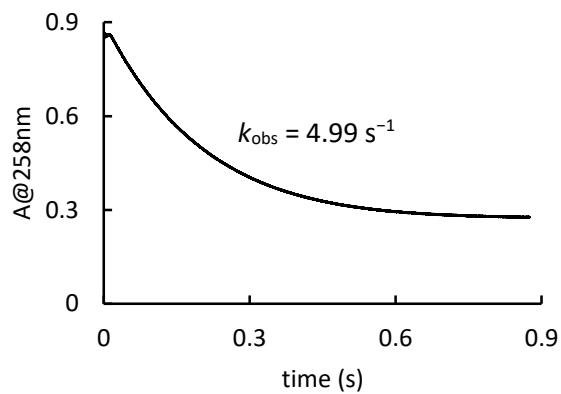

**Table S42.** Kinetics of the reactions of  $\text{PMe}_2\text{Ph}$  and **5** (stopped-flow method, detection at 258 nm, in  $\text{CH}_2\text{Cl}_2$ )

| $[\text{PMe}_2\text{Ph}]$ (M)                             | <b>4</b> (M)          | $k_{\text{obs}}$ ( $\text{s}^{-1}$ ) |
|-----------------------------------------------------------|-----------------------|--------------------------------------|
| $1.63 \times 10^{-4}$                                     | $5.08 \times 10^{-3}$ | <b>2.05</b>                          |
|                                                           | $6.77 \times 10^{-3}$ | <b>2.83</b>                          |
|                                                           | $8.47 \times 10^{-3}$ | <b>3.52</b>                          |
|                                                           | $1.02 \times 10^{-2}$ | <b>4.23</b>                          |
|                                                           | $1.19 \times 10^{-2}$ | <b>4.99</b>                          |
| $k_2 = 4.26 \times 10^2 \text{ M}^{-1}\cdot\text{s}^{-1}$ |                       |                                      |

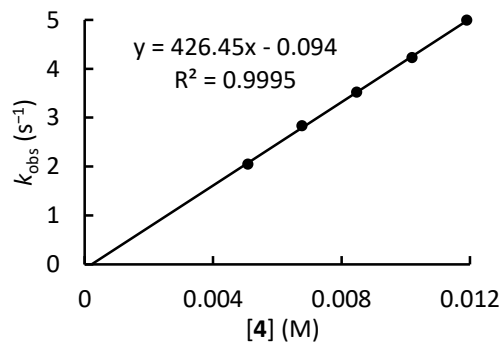

Kinetics of the reactions of ESF (**4**) with PBU<sub>3</sub> in CH<sub>2</sub>Cl<sub>2</sub> (at 20 °C)

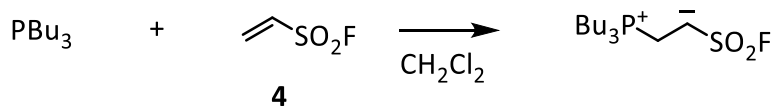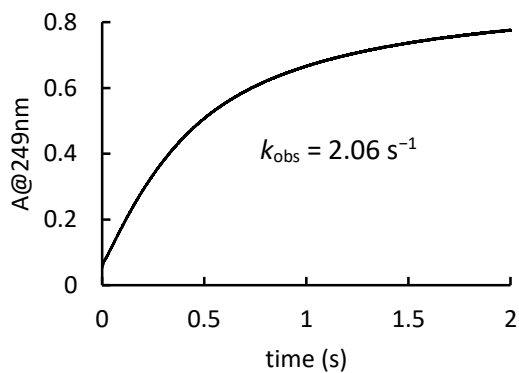

**Table S43.** Kinetics of the reactions of PBU<sub>3</sub> and **4** (stopped-flow method, detection at 249 nm, in CH<sub>2</sub>Cl<sub>2</sub>)

| [PBU <sub>3</sub> ] (M)                                   | [ <b>4</b> ] (M)      | $k_{\text{obs}}$ (s <sup>-1</sup> ) |
|-----------------------------------------------------------|-----------------------|-------------------------------------|
| $3.21 \times 10^{-4}$                                     | $3.11 \times 10^{-3}$ | <b>2.06</b>                         |
|                                                           | $4.14 \times 10^{-3}$ | <b>2.88</b>                         |
|                                                           | $5.18 \times 10^{-3}$ | <b>3.61</b>                         |
|                                                           | $6.21 \times 10^{-3}$ | <b>4.45</b>                         |
|                                                           | $8.28 \times 10^{-3}$ | <b>6.20</b>                         |
|                                                           | $9.32 \times 10^{-3}$ | <b>6.99</b>                         |
| $k_2 = 7.99 \times 10^2 \text{ M}^{-1}\cdot\text{s}^{-1}$ |                       |                                     |

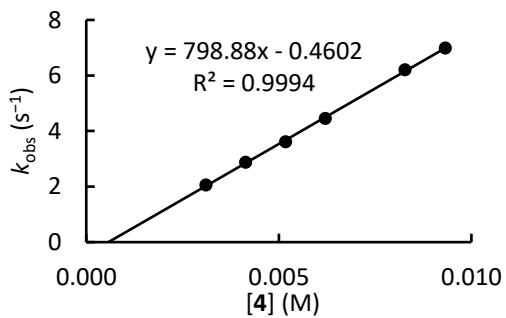

Kinetics of the reactions of ESF (**4**) with  $\text{PMe}_3$  in  $\text{CH}_2\text{Cl}_2$  (at 20 °C)

first mixer: generation of a known concentration of  $\text{PMe}_3$

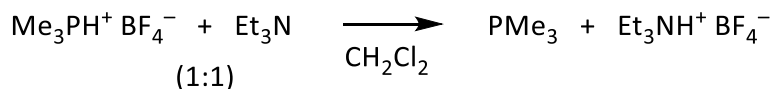

second mixer: reaction of  $\text{PMe}_3$  with ESF (**4**)

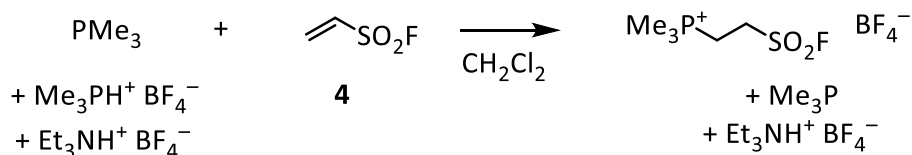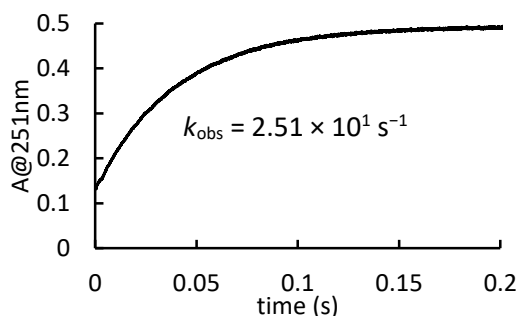

**Table S44.** Kinetics of the reactions of  $\text{PMe}_3$  and **4** ( $\text{PMe}_3$  was generated by the deprotonation of trimethylphosphonium tetrafluoroborate with a stoichiometric amount of  $\text{NEt}_3$  in the first step of the sequential mixing stopped-flow method, detection at 251 nm, in  $\text{CH}_2\text{Cl}_2$ )

| $[\text{PMe}_3]$ (M)                                   | <b>4</b> (M)          | $k_{\text{obs}}$ ( $\text{s}^{-1}$ ) |
|--------------------------------------------------------|-----------------------|--------------------------------------|
| $1.42 \times 10^{-3}$                                  | $1.37 \times 10^{-2}$ | $2.51 \times 10^1$                   |
|                                                        | $2.05 \times 10^{-2}$ | $4.01 \times 10^1$                   |
|                                                        | $2.74 \times 10^{-2}$ | $5.37 \times 10^1$                   |
|                                                        | $3.42 \times 10^{-2}$ | $6.82 \times 10^1$                   |
|                                                        | $4.11 \times 10^{-2}$ | $8.21 \times 10^1$                   |
| $k_2 = 2.07 \times 10^3 \text{ M}^{-1} \text{ s}^{-1}$ |                       |                                      |

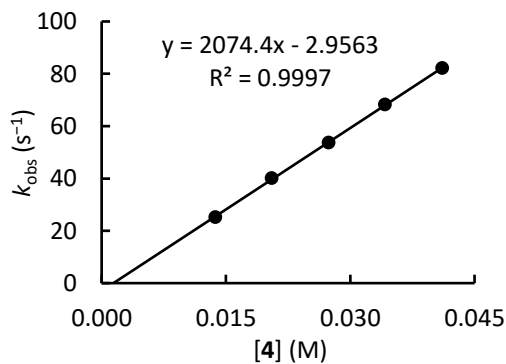

## 5.2.5 Kinetics of the reactions with ethyl 2-butynoate (5) with PR<sub>3</sub>

Kinetics of the reactions of ethyl 2-butynoate (5) with PPh<sub>3</sub> in CD<sub>2</sub>Cl<sub>2</sub> (at 20 °C)

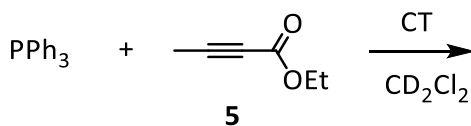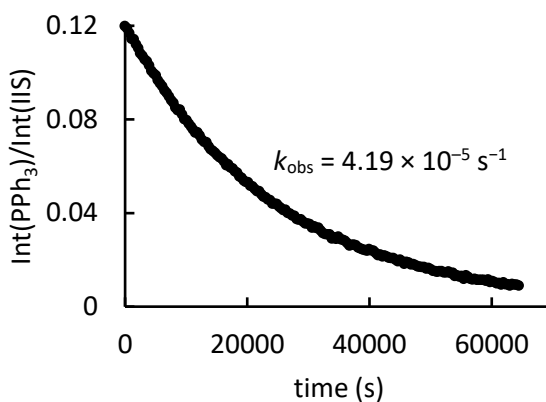

**Table S45.** Kinetics of the reaction of PPh<sub>3</sub> and **5** (proton source: CT, <sup>31</sup>P NMR method, monitoring of the decreasing <sup>31</sup>P NMR signal of PPh<sub>3</sub> at -5.5 ppm,<sup>S12</sup> in CD<sub>2</sub>Cl<sub>2</sub>, Et<sub>3</sub>PO as internal integration standard, IIS)

| [PPh <sub>3</sub> ] (M) | [5] (M)                       | [CT] (M)                | <i>k</i> <sub>obs</sub> (s <sup>-1</sup> ) |
|-------------------------|-------------------------------|-------------------------|--------------------------------------------|
| 8.77 × 10 <sup>-2</sup> | <b>8.92 × 10<sup>-1</sup></b> | 1.14 × 10 <sup>-1</sup> | <b>1.71 × 10<sup>-5</sup></b>              |
| 1.35 × 10 <sup>-1</sup> | <b>1.35</b>                   | 1.73 × 10 <sup>-1</sup> | <b>2.73 × 10<sup>-5</sup></b>              |
| 1.73 × 10 <sup>-1</sup> | <b>1.70</b>                   | 2.61 × 10 <sup>-1</sup> | <b>3.37 × 10<sup>-5</sup></b>              |
| 2.06 × 10 <sup>-1</sup> | <b>2.09</b>                   | 3.49 × 10 <sup>-1</sup> | <b>4.19 × 10<sup>-5</sup></b>              |

$$k_2 = 2.05 \times 10^{-5} \text{ M}^{-1} \text{ s}^{-1}$$

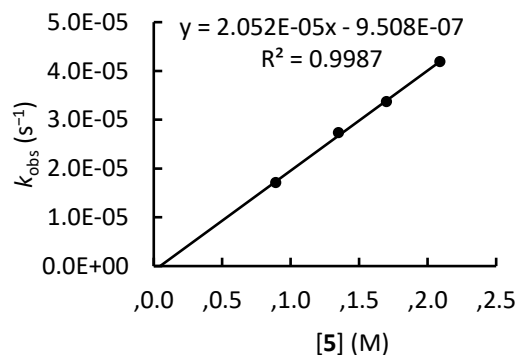

Kinetics of the reactions of ethyl 2-butynoate (**5**) with  $\text{PBu}_3$  in  $\text{CD}_2\text{Cl}_2$  (at 20 °C)

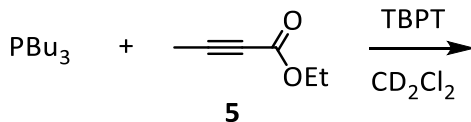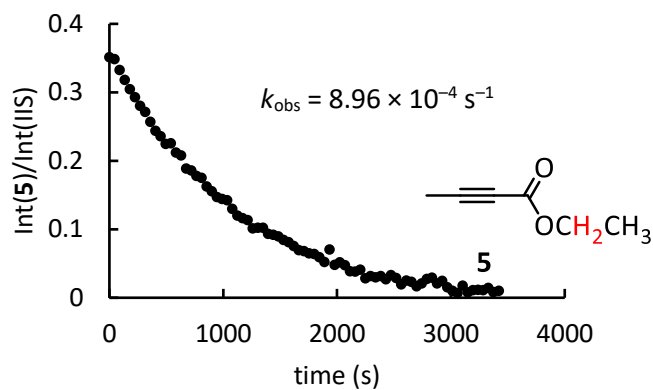

**Table S46.** Kinetics of the reaction of  $\text{PBu}_3$  and **5** (proton source: TBPT,  $^1\text{H}$  NMR method, monitoring of the decreasing  $^1\text{H}$  NMR signal of 4.16 ppm, residual  $\text{CH}_2\text{Cl}_2$  as internal integration standard, IIS)

| $[\text{PBu}_3]$ (M)  | <b>[5]</b> (M)        | [TBPT] (M)            | $k_{\text{obs}}$ ( $\text{s}^{-1}$ ) |
|-----------------------|-----------------------|-----------------------|--------------------------------------|
| $5.34 \times 10^{-2}$ | $2.23 \times 10^{-3}$ | $5.77 \times 10^{-3}$ | $3.16 \times 10^{-4}$                |
| $8.50 \times 10^{-2}$ | $4.46 \times 10^{-3}$ | $1.15 \times 10^{-2}$ | $4.75 \times 10^{-4}$                |
| $1.16 \times 10^{-1}$ | $4.46 \times 10^{-3}$ | $1.15 \times 10^{-2}$ | $6.91 \times 10^{-4}$                |
| $1.57 \times 10^{-1}$ | $4.46 \times 10^{-3}$ | $1.15 \times 10^{-2}$ | $8.96 \times 10^{-4}$                |

$$k_2 = 5.71 \times 10^{-3} \text{ M}^{-1} \text{ s}^{-1}$$

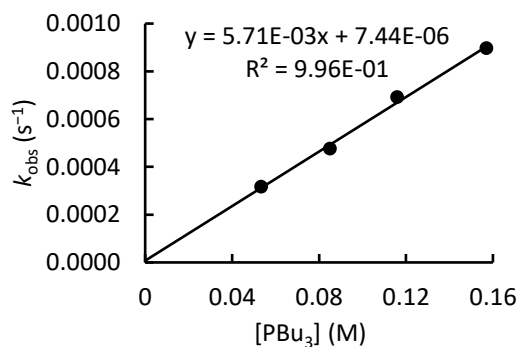

## 6 Theoretical Analysis

### 6.1 Prelude: Quantum-Chemical Method Validation

Previous reports on the results of the quantum-chemical investigation of the  $\text{PMe}_3$  addition to methyl allenoate, which used the CPCM(benzene)/B3LYP/6-31G(d)//B3LYP/6-31G(d) level of theory<sup>S13</sup> or the CPCM(benzene)/B3LYP/6-31G+(d)//B3LYP/6-31G+(d) level of theory,<sup>S14</sup> have been ambiguous. We, therefore, started by evaluating the influence of various basis sets, electronic structure methods, and solvation models on the results of the quantum-chemical calculations.

As shown in Scheme S1, the addition of  $\text{PMe}_3$  to ethyl allenoate (**2**) was used as a model reaction, for which we calculated the reaction energies ( $\Delta G_{\text{add}}$ ). Additionally, we analysed the differences in P–O and P–C distances in the zwitterionic product.

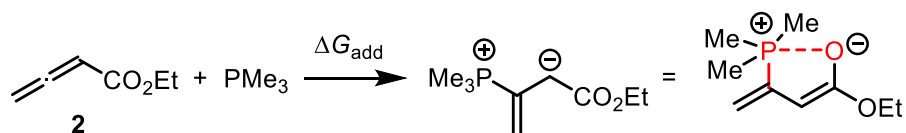

**Scheme S1.** Reaction of  $\text{PMe}_3$  with the allenoate **2** to form a zwitterionic adduct. The considered P–O and P–C atom distances are highlighted in red.

**Basis Set.** Table S47 gathers  $\Delta G_{\text{add}}$  values computed by using the density functional theory (DFT) functional B3LYP<sup>S15</sup> in gas phase with different basis sets along with the P–O and P–C bond lengths in the optimised zwitterionic product.

**Table S47.** Reaction energies ( $\Delta G_{\text{add}}$ ) for the addition of  $\text{PMe}_3$  to ethyl allenoate (as defined in Scheme S1). Computed with the DFT functional B3LYP. P–O and P–C atom distances of the zwitterionic product.

| Basis set              | $\Delta G_{\text{add}}$ (kJ mol <sup>-1</sup> ) | P–C (Å)            | P–O (Å)            |
|------------------------|-------------------------------------------------|--------------------|--------------------|
| 6-31G(d)               | +47.7                                           | 1.833              | 2.559              |
| 6-31G(d) <sup>a</sup>  | +44.6 <sup>a</sup>                              | 1.824 <sup>a</sup> | 2.801 <sup>a</sup> |
| 6-31G(d,p)             | +45.6                                           | 1.833              | 2.574              |
| 6-31+G(d)              | +47.9                                           | 1.833              | 2.658              |
| 6-31+G(d) <sup>b</sup> | +48.1 <sup>b</sup>                              | 1.836 <sup>b</sup> | 2.514 <sup>b</sup> |
| 6-311++G(2df,2p)       | +40.3                                           | 1.821              | 2.654              |
| def2-SVP               | +33.2                                           | 1.827              | 2.800              |
| def2-TZVPP             | +38.1                                           | 1.818              | 2.645              |
| def2-QZVPP             | +38.2                                           | 1.817              | 2.650              |

<sup>a</sup> As reported by Dudding *et al.* for the  $\text{PMe}_3$  addition to methyl allenoate (ref. S13). <sup>b</sup> As reported by Yu *et al.* for the  $\text{PMe}_3$  addition to methyl allenoate (ref. S14).

The studied double- $\zeta$  basis sets from the Pople family<sup>S16</sup> yield very similar results for  $\Delta G_{\text{add}}$  with values of +47.7 kJ mol<sup>-1</sup> for 6-31G(d), +45.6 kJ mol<sup>-1</sup> for 6-31G(d,p), and +47.9 kJ mol<sup>-1</sup> for 6-31+G(d). Additionally, all these basis sets predict the same P–C bond length of 1.833 Å. In contrast, using the triple- $\zeta$  basis set 6-311++G(2df,2p) from the Pople family results in a noticeably lower  $\Delta G_{\text{add}}$  of +40.3 kJ mol<sup>-1</sup> and a slightly shorter P–C bond of 1.821 Å. The Karlsruhe<sup>S17</sup> triple- $\zeta$  basis set def2-TZVPP gives a  $\Delta G_{\text{add}}$  of +38.1 kJ mol<sup>-1</sup>, and the (much larger) quadruple- $\zeta$  basis set def2-QZVPP yields an almost identical  $\Delta G_{\text{add}}$  of +38.2 kJ mol<sup>-1</sup>, both of which are close to the results obtained with the 6-311++G(2df,2p) basis set. The P–C bond length for these basis sets are also similar to 6-311++G(2df,2p), with def2-TZVPP giving 1.818 Å and def2-QZVPP showing 1.817 Å. The small double- $\zeta$  basis set def2-SVP from the Karlsruhe family predicts a much smaller value at  $\Delta G_{\text{add}} = +33.2$  kJ mol<sup>-1</sup>, possibly due to basis set superposition (BSSE) errors.

In general terms, computed  $\Delta G_{\text{add}}$  values as well as key structural features of reactants and products could be reproduced (within  $\pm 1$  kcal mol<sup>-1</sup>) consistent with the findings previously reported in refs. S13 and S14. Thus, the difference of PMe<sub>3</sub> reacting with either methyl or ethyl allenolate seems to be minor. That the P–O distance as the most sensitive geometrical parameter shows significant variations for seemingly similar theoretical methods may reflect differences in the default settings of the program releases used for the computations (such as DFT integration grid size or convergence criteria for optimisations).

**Electronic structure method.** To investigate the influence of the electronic structure method we computed the same parameters as before with different methods (B3LYP, D3<sup>S18</sup>-B3LYP, MN15,<sup>S19</sup>  $\omega$ b97X-D2,<sup>S20</sup> B2PLYP,<sup>S21</sup> and MP2). The def2-TZVPP basis set was used for all calculations, which were done in gas phase (Table S48).

The B3LYP functional predicts a  $\Delta G_{\text{add}}$  value of +38.1 kJ mol<sup>-1</sup>, while the D3-corrected B3LYP method provides a significantly different value of –4.5 kJ mol<sup>-1</sup>. Modern DFT functionals that account for dispersion effects predict a thermoneutral or even exergonic process, with MN15 yielding –13.5 kJ mol<sup>-1</sup> and  $\omega$ B97X-D2 giving +0.5 kJ mol<sup>-1</sup>. B2PLYP, which includes a parametrised combination of MP2 correlation energies and components of the B3LYP hybrid functional, predicts a reaction energy ( $\Delta G_{\text{add}}$ ) of +14.5 kJ mol<sup>-1</sup>. Additional consideration of empirical dispersion corrections as in D3-B2PLYP predicts a slightly exergonic reaction ( $\Delta G_{\text{add}} = -6.9$  kJ mol<sup>-1</sup>), in agreement with other dispersion-corrected DFT functionals. MP2 theory, which overestimates dispersion effects, predicts a  $\Delta G_{\text{add}}$  value of –30.0 kJ mol<sup>-1</sup>.





**Table S48.** Reaction energies ( $\Delta G_{\text{add}}$ ) for the addition of  $\text{PMe}_3$  to ethyl allenoate (see Scheme S1). Computed with the different electronic structure methods and the def2-TZVPP basis set. P–O and P–C distances in the zwitterionic product. RHF refers to the reference energy in MP2 calculations.

| Method             | $\Delta G_{\text{add}}$ (kJ mol <sup>-1</sup> ) | P-C (Å)              | P-O (Å)              |
|--------------------|-------------------------------------------------|----------------------|----------------------|
| B3LYP              | +38.1                                           | 1.818                | 2.645                |
| D3-B3LYP           | -4.5                                            | 1.812                | 2.605                |
| MN15               | -13.5                                           | 1.802                | 2.349                |
| $\omega$ b97X-D2   | +0.5                                            | 1.809                | 2.619                |
| B2PLYP             | +14.5                                           | 1.817                | 2.403                |
| D3-B2PLYP          | -6.9                                            | 1.813                | 2.410                |
| MP2                | -30.0                                           | 1.815                | 2.193                |
| (RHF) <sup>a</sup> | (+81.9) <sup>a</sup>                            | (1.815) <sup>a</sup> | (2.193) <sup>a</sup> |

<sup>a</sup> Based on MP2-optimised geometries.

**Solvation Model.** We also investigated the impact of two commonly used implicit solvation models, CPCM<sup>S22</sup> and SMD.<sup>S23</sup> For all calculations in Table S49 DCM was chosen as solvent and the def2-TZVPP basis set was used in combination with different electronic structure methods, if not stated otherwise.

**Table S49.** Reaction energies ( $\Delta G_{\text{add}}$ ) for the addition of  $\text{PMe}_3$  to ethyl allenoate (see Scheme S1). Computed with the different electronic structure methods and the def2-TZVPP basis set in combination with CPCM(DCM) or SMD(DCM). P–O and P–C distances in the zwitterionic product. RHF refers to the reference energy in MP2 calculations.

| Method             | CPCM(DCM)                                       |                      |                      | SMD(DCM)                                        |                      |                      |
|--------------------|-------------------------------------------------|----------------------|----------------------|-------------------------------------------------|----------------------|----------------------|
|                    | $\Delta G_{\text{add}}$ (kJ mol <sup>-1</sup> ) | P-C (Å)              | P-O (Å)              | $\Delta G_{\text{add}}$ (kJ mol <sup>-1</sup> ) | P-C (Å)              | P-O (Å)              |
| B3LYP              | +21.2                                           | 1.816                | 3.027                | +19.4                                           | 1.820                | 3.036                |
| B3LYP <sup>a</sup> | 0.0 <sup>a</sup>                                | 1.824 <sup>a</sup>   | 2.801 <sup>a</sup>   | --                                              | --                   | --                   |
| B3LYP <sup>b</sup> | +40.6 <sup>b</sup>                              | 1.836 <sup>b</sup>   | 2.514 <sup>b</sup>   | --                                              | --                   | --                   |
| D3-B3LYP           | -20.1                                           | 1.810                | 2.988                | -21.9                                           | 1.813                | 2.995                |
| MN15               | -23.2                                           | 1.796                | 2.755                | -26.0                                           | 1.799                | 2.779                |
| $\omega$ b97X-D2   | -16.9                                           | 1.807                | 3.011                | -17.6                                           | 1.810                | 3.015                |
| B2PLYP             | -2.8                                            | 1.808                | 2.987                | -4.8                                            | 1.812                | 2.995                |
| D3-B2PLYP          | -23.7                                           | 1.806                | 2.967                | -25.1                                           | 1.809                | 2.976                |
| MP2                | -45.2                                           | 1.798                | 2.933                | -46.2                                           | 1.801                | 2.942                |
| (RHF) <sup>c</sup> | (+48.7) <sup>c</sup>                            | (1.798) <sup>c</sup> | (2.933) <sup>c</sup> | (+46.5) <sup>c</sup>                            | (1.801) <sup>c</sup> | (2.942) <sup>c</sup> |

<sup>a</sup> As reported by Dudding *et al.* for the  $\text{PMe}_3$  addition to methyl allenoate (ref. S13). The 6-31G(d) basis set was used. Structures optimised in gas phase. Solvation energies were obtained by single point energies, using benzene as solvent. Level of theory: CPCM(benzene)/B3LYP/6-31G(d)//B3LYP/6-31G(d).

<sup>b</sup> As reported by Yu *et al.* for the  $\text{PMe}_3$  addition to methyl allenoate (ref. S14). The 6-31G+(d) basis set was used. Structures optimised in gas phase. Solvation energies were obtained by single point energies, using benzene as solvent. Level of theory: CPCM(benzene)/B3LYP/6-31G+(d)//B3LYP/6-31G+(d). <sup>c</sup> Based on MP2-optimised geometries.

Compared to the  $\Delta G_{\text{add}}$  computed in the gas phase (see Table S48), both CPCM and SMD solvation models exhibit a similar trend: the Gibbs energies for adduct formation,  $\Delta G_{\text{add}}$ , are approx. 10–

20 kJ mol<sup>-1</sup> lower than in the gas phase, making the reaction more exergonic and highlighting the solvent's stabilising effect on zwitterions. The difference between SMD and CPCM is insignificant, with SMD producing slightly lower  $\Delta G_{\text{add}}$  values by about 1–3 kJ mol<sup>-1</sup>. Additionally, solvation significantly influences the geometry of the zwitterion and P–O bond distances in the gas phase are approximately 0.4–0.6 Å shorter compared to those in structures optimised with a solvation model. The P–C bond distances are very similar for gas phase and optimisation with a solvation model. For DFT methods, the difference in P–C bond lengths between gas-phase and solvated geometries is only 0.001–0.008 Å. For MP2, the differences are slightly more pronounced, ranging from 0.014–0.017 Å. However, both DFT and MP2 methods exhibit the same trend: P–C bonds are slightly longer in the gas phase compared to those optimised with a solvation model.

Reported  $\Delta G_{\text{add}}$  values by Yu and coworkers obtained at the CPCM(benzene)/B3LYP/6-31G+(d) // B3LYP/6-31G+(d) level theory (ref. S14) are significantly larger (19.4 kJ mol<sup>-1</sup>) than the ones obtained at the CPMC(DCM)/B3LYP/def2-TZVPP level theory. Regarding the small difference of dielectric constants  $\epsilon$  (as implemented in Gaussian16)<sup>S24</sup> of benzene ( $\epsilon = 2.2706$ ) and DCM ( $\epsilon = 8.93$ ) the influence of the chosen solvent appears to be minor. Besides the difference in the basis set (see above), the differently calculated  $\Delta G_{\text{add}}$  can be attributed to the differences in the optimised geometries. Dudding and coworkers reported a thermoneutral reaction with  $\Delta G_{\text{add}} = 0.0$  kJ mol<sup>-1</sup> in ref. S13, and we were unable to reproduce this  $\Delta G_{\text{add}}$  from data given in the supplemental information of ref. S13.

### Conclusions from the quantum-chemical method validation

- A triple- $\zeta$  basis set is necessary, at least for energies.
- Dispersion effects play a key role in the studied system. B3LYP without any dispersion corrections does not provide satisfying results. Hence, the use of electronic structure methods which account for dispersion effects is unavoidable.
- Solvation strongly influences the stability of the formed zwitterion and its geometrical properties. Therefore, accounting for solvation effects is already necessary for geometry optimisations. SMD and CPCM provide very similar results.

## 6.2 Computational Methods

Conformational space of all molecules was initially explored using Conformer-Rotamer Ensemble Sampling Tool (CREST)<sup>S25</sup> with the GFN2-xTB method.<sup>S26</sup> Geometry optimisations have been performed with a combination of the MN15 functional<sup>S19</sup> and the def2-TZVPP basis set.<sup>S17</sup> The nature of all stationary points (minima and transition states) was verified through the computation of the vibrational frequencies. Solvation effects have been considered by applying the SMD (DCM or H<sub>2</sub>O for pK<sub>aH</sub> values) solvation model<sup>S23</sup> to both geometries and energies. Density functional theory (DFT) calculations have been performed with the Gaussian 16 program package.<sup>S24</sup> Reaction barriers and reaction energies of phosphine additions to Michael acceptors and studied pronation reactions have been subject to thermochemical corrections for entropy and enthalpy. The Grimme method for entropy<sup>S27</sup> and the Head-Gordon enthalpy correction<sup>S28</sup> was applied by using Goodvibes.<sup>S29</sup> Free energies in solution have been corrected to a reference state of 1 mol/l at 298.15 K through addition of  $RT\ln(24.46) = +7.925$  kJ mol<sup>-1</sup> (= 0.0030185 Hartree) to the gas phase (1 atm) free energies. The value for  $R = 8.31451$  J K<sup>-1</sup> mol<sup>-1</sup>. NBO charges<sup>S30,S31</sup> were calculated from the same level of theory as used before. The reaction path for energy strain analysis was explored by employment of the intrinsic reaction coordinate (IRC) method. DLPNO-CCSD(T)<sup>S32,S33</sup> calculations were carried out using ORCA 5.03.<sup>S34</sup> Solvation Energies were determined by subtracting  $E_{tot}$  in gas phase and  $E_{tot}$  with applied SMD model at the DFT level of theory. Molecular structures were visualised using *CYLV*iew.<sup>S35</sup>

## 6.3 Computational Results

### 6.3.1 Michael acceptors

**Table S50.** Computed properties of Michael acceptors in dichloromethane. Entropic contributions have been corrected to the reference state.  $\Delta H^*$  refers to thermal correction to enthalpy with the Head-Gordon correction and  $\Delta G^*$  to the thermal correction to Gibbs Free Energy including the Grimme method. Level of theory: SMD(DCM)/MN15/def2-TZVPP. Energies are given in Hartree

| Michael acceptor | Conformers | $E_{tot}$      | $\Delta H$ | $\Delta H^*$ | $\Delta G$ | $\Delta G^*$ |
|------------------|------------|----------------|------------|--------------|------------|--------------|
| <b>1</b>         | 1_1        | -345.533372880 | 0.135829   | 0.131964     | 0.094407   | 0.094171     |
|                  | 1_2        | -345.532930913 | 0.135857   | 0.132028     | 0.094699   | 0.094445     |
|                  | 1_3        | -345.532729436 | 0.135807   | 0.131940     | 0.094269   | 0.093971     |
| <b>2</b>         | 2_1        | -383.571065782 | 0.140830   | 0.136721     | 0.096785   | 0.096446     |
|                  | 2_2        | -383.570935499 | 0.140797   | 0.136657     | 0.096596   | 0.096457     |
|                  | 2_3        | -383.570654104 | 0.140882   | 0.136906     | 0.097208   | 0.096951     |
| <b>3</b>         | 3_1        | -344.277940118 | 0.111749   | 0.108008     | 0.070987   | 0.070717     |
|                  | 3_2        | -344.277531935 | 0.111808   | 0.108138     | 0.071468   | 0.071191     |
|                  | 3_3        | -344.273051416 | 0.111670   | 0.108003     | 0.070951   | 0.070663     |

### 6.3.2 Phosphines

**Table S51.** Computed properties of phosphines in dichloromethane. Entropic contributions have been corrected to the reference state.  $\Delta H^*$  refers to thermal correction to enthalpy with the Head-Gordon correction and  $\Delta G^*$  to the thermal correction to Gibbs Free Energy including the Grimme method. Level of theory: SMD(DCM)/MN15/def2-TZVPP. Energies are given in Hartree

| Phosphine           | Conformers | $E_{tot}$      | $\Delta H$ | $\Delta H^*$ | $\Delta G$ | $\Delta G^*$ |
|---------------------|------------|----------------|------------|--------------|------------|--------------|
| PMe <sub>3</sub>    | PMe3       | -460.878551867 | 0.123007   | 0.119852     | 0.086256   | 0.086111     |
| PPhMe <sub>2</sub>  | PPhMe2_1   | -652.451020029 | 0.180444   | 0.176684     | 0.135409   | 0.135358     |
|                     | PPhMe2_2   | -652.450587011 | 0.180476   | 0.176650     | 0.135216   | 0.135118     |
| PPh <sub>2</sub> Me | PPh2Me_1   | -844.023613292 | 0.237453   | 0.232768     | 0.183276   | 0.183894     |
| PPh <sub>3</sub>    | PPh3_1     | -1035.59514513 | 0.294399   | 0.288508     | 0.230952   | 0.232221     |
|                     | Pani3_1    | -1378.95509153 | 0.400061   | 0.392757     | 0.316755   | 0.319443     |
| P(ani) <sub>3</sub> | Pani3_2    | -1378.95525294 | 0.400148   | 0.392890     | 0.318901   | 0.320613     |
|                     | Pani3_3    | -1378.95526010 | 0.400099   | 0.392856     | 0.318807   | 0.320605     |
| P(pfp) <sub>3</sub> | Ppfp3_1    | -1333.22799765 | 0.271939   | 0.265699     | 0.202072   | 0.203742     |
|                     | PCy3_1     | -1046.42327676 | 0.505120   | 0.499506     | 0.438444   | 0.438044     |
| PCy <sub>3</sub>    | PCy3_2     | -1046.42522543 | 0.505001   | 0.499260     | 0.437866   | 0.437488     |
|                     | PCy3_3     | -1046.42324061 | 0.505103   | 0.499419     | 0.438030   | 0.437734     |
| PBu <sub>3</sub>    | PBu3_1     | -814.353157457 | 0.391101   | 0.384320     | 0.321583   | 0.321913     |
|                     | PBu3_2     | -814.354991360 | 0.391511   | 0.385688     | 0.326725   | 0.326638     |
|                     | PBu3_3     | -814.354991340 | 0.391511   | 0.385687     | 0.326721   | 0.326635     |

**Table S52.** Computed properties of phosphines in water. Entropic contributions have been corrected to the reference state.  $\Delta H^*$  refers to thermal correction to enthalpy with the Head-Gordon correction and  $\Delta G^*$  to the thermal correction to Gibbs Free Energy including the Grimme method. Level of theory: SMD(H<sub>2</sub>O)/MN15/def2-TZVPP. Energies are given in Hartree

| Phosphine           | Conformers   | $E_{tot}$       | $\Delta H$ | $\Delta H^*$ | $\Delta G$ | $\Delta G^*$ |
|---------------------|--------------|-----------------|------------|--------------|------------|--------------|
| PMe <sub>3</sub>    | PMe3_H2O     | -460.873204485  | 0.123017   | 0.119864     | 0.086300   | 0.086156     |
| PPhMe <sub>2</sub>  | PPhMe2_1_H2O | -652.441458364  | 0.180549   | 0.176795     | 0.135570   | 0.135528     |
|                     | PPhMe2_2_H2O | -652.440766445  | 0.180469   | 0.176628     | 0.135119   | 0.135012     |
| PPh <sub>2</sub> Me | PPh2Me_1_H2O | -844.009476531  | 0.237571   | 0.232902     | 0.183632   | 0.184171     |
| PPh <sub>3</sub>    | PPh3_1_H2O   | -1035.576260530 | 0.294548   | 0.288664     | 0.230790   | 0.232236     |
| P(ani) <sub>3</sub> | Pani3_1_H2O  | -1378.937122370 | 0.400424   | 0.393182     | 0.318893   | 0.320785     |
|                     | Pani3_2_H2O  | -1378.937349850 | 0.400439   | 0.393173     | 0.319154   | 0.320894     |
|                     | Pani3_3_H2O  | -1378.937314140 | 0.400390   | 0.393150     | 0.319275   | 0.321016     |
| P(pfp) <sub>3</sub> | Ppfp3_1_H2O  | -1333.208982210 | 0.272004   | 0.265777     | 0.202128   | 0.203821     |
| PCy <sub>3</sub>    | PCy3_1_H2O   | -1046.404023460 | 0.505167   | 0.499578     | 0.438636   | 0.43821      |
|                     | PCy3_2_H2O   | -1046.406062040 | 0.505064   | 0.499348     | 0.438054   | 0.43766      |
|                     | PCy3_3_H2O   | -1046.404132810 | 0.505178   | 0.499524     | 0.438257   | 0.437945     |
| PBu <sub>3</sub>    | PBu3_1_H2O   | -814.336223256  | 0.391133   | 0.384371     | 0.321801   | 0.322046     |
|                     | PBu3_2_H2O   | -814.338970788  | 0.391504   | 0.385759     | 0.327033   | 0.326901     |
|                     | PBu3_3_H2O   | -814.337006698  | 0.391463   | 0.385306     | 0.325251   | 0.325301     |
| POct <sub>3</sub>   | POct3_1_H2O  | -1285.637057420 | 0.744038   | 0.73784      | 0.648090   | 0.64818      |
|                     | POct3_2_H2O  | -1285.638311120 | 0.744288   | 0.738466     | 0.650005   | 0.650092     |
|                     | POct3_3_H2O  | -1285.632491300 | 0.744184   | 0.737644     | 0.644270   | 0.645378     |

### 6.3.3 Protonated phosphines

**Table S53.** Computed properties of protonated phosphines in water. Entropic contributions have been corrected to the reference state.  $\Delta H^*$  refers to thermal correction to enthalpy with the Head-Gordon correction and  $\Delta G^*$  to the thermal correction to Gibbs Free Energy including the Grimme method. Level of theory: SMD(H<sub>2</sub>O)/MN15/def2-TZVPP. Energies are given in Hartree

| PR <sub>3</sub> H <sup>+</sup>     | Conformers             | E <sub>tot</sub> | $\Delta H$ | $\Delta H^*$ | $\Delta G$ | $\Delta G^*$ |
|------------------------------------|------------------------|------------------|------------|--------------|------------|--------------|
| PMe <sub>3</sub> H <sup>+</sup>    | PMe <sub>3</sub> H     | -461.338531264   | 0.131654   | 0.131497     | 0.097517   | 0.097352     |
| PPhMe <sub>2</sub> H <sup>+</sup>  | PPhMe <sub>2</sub> H_1 | -652.899862875   | 0.188775   | 0.187987     | 0.146179   | 0.146167     |
|                                    | PPhMe <sub>2</sub> H_2 | -652.899917179   | 0.188739   | 0.187868     | 0.146022   | 0.145865     |
| PPh <sub>2</sub> MeH <sup>+</sup>  | PPh <sub>2</sub> MeH_1 | -844.461706038   | 0.245841   | 0.244078     | 0.193570   | 0.194464     |
| PPh <sub>3</sub> H <sup>+</sup>    | PPh <sub>3</sub> H_1   | -1036.023781070  | 0.302949   | 0.300155     | 0.242118   | 0.243429     |
|                                    | Pani <sub>3</sub> H_1  | -1379.390940600  | 0.408805   | 0.404676     | 0.331619   | 0.332814     |
| P(ani) <sub>3</sub> H <sup>+</sup> | Pani <sub>3</sub> H_2  | -1379.390863520  | 0.408721   | 0.404569     | 0.331487   | 0.332670     |
|                                    | Pani <sub>3</sub> H_3  | -1379.390197940  | 0.408544   | 0.404300     | 0.330298   | 0.331897     |
| P(pfp) <sub>3</sub> H <sup>+</sup> | Ppfp <sub>3</sub> H_1  | -1333.654737100  | 0.280340   | 0.277072     | 0.213329   | 0.214879     |
|                                    | PCy <sub>3</sub> H_1   | -1046.873868770  | 0.514459   | 0.511686     | 0.449827   | 0.449677     |
| PCy <sub>3</sub> H <sup>+</sup>    | PCy <sub>3</sub> H_2   | -1046.874371110  | 0.514216   | 0.511400     | 0.449422   | 0.449188     |
|                                    | PCy <sub>3</sub> H_3   | -1046.871214870  | 0.514320   | 0.511524     | 0.449409   | 0.449281     |
| PBu <sub>3</sub> H <sup>+</sup>    | PBu <sub>3</sub> H_1   | -814.802200230   | 0.400030   | 0.396228     | 0.333545   | 0.333649     |
|                                    | PBu <sub>3</sub> H_2   | -814.807971194   | 0.401250   | 0.398987     | 0.341536   | 0.340963     |
|                                    | PBu <sub>3</sub> H_3   | -814.804382801   | 0.400679   | 0.397681     | 0.337504   | 0.337610     |
| POct <sub>3</sub> H <sup>+</sup>   | POct <sub>3</sub> H_1  | -1286.110050360  | 0.757439   | 0.752149     | 0.666137   | 0.665492     |
|                                    | POct <sub>3</sub> H_2  | -1286.108774210  | 0.757022   | 0.751529     | 0.664767   | 0.664274     |
|                                    | POct <sub>3</sub> H_3  | -1286.108310240  | 0.75762    | 0.752227     | 0.664960   | 0.665007     |



### 6.3.4 Methylated phosphines

**Table S54.** Computed properties of the methyl cation and of methylated phosphines in dichloromethane. Level of theory: SMD(DCM)/MN15/def2-TZVPP. Energies are given in Hartree

| Cations                                       | Conformers | $E_{tot}$       | $\Delta H$ | $\Delta G$ |
|-----------------------------------------------|------------|-----------------|------------|------------|
| CH <sub>3</sub> <sup>+</sup>                  | CH3_1      | -39.5523638647  | 0.038606   | 0.015734   |
| PMe <sub>4</sub> <sup>+</sup>                 | PMe4_1     | -500.632957759  | 0.164440   | 0.123478   |
| PPhMe <sub>3</sub> <sup>+</sup>               | PPhMe3_1   | -692.1997858730 | 0.221835   | 0.173656   |
| PPh <sub>2</sub> Me <sub>2</sub> <sup>+</sup> | PPh2Me2_1  | -883.7671592140 | 0.278831   | 0.221683   |
| PPh <sub>3</sub> Me <sup>+</sup>              | PPh3Me_1   | -1075.33471286  | 0.336875   | 0.271439   |
| P(ani) <sub>3</sub> Me <sup>+</sup>           | Pani3Me_1  | -1418.70181668  | 0.442824   | 0.361672   |
|                                               | Pani3Me_2  | -1418.70144164  | 0.442861   | 0.361453   |
|                                               | Pani3Me_3  | -1418.70120633  | 0.442765   | 0.361267   |
| P(pfp) <sub>3</sub> Me <sup>+</sup>           | Ppfp3Me_1  | -1372.96339501  | 0.314416   | 0.244398   |
| PCy <sub>3</sub> Me <sup>+</sup>              | PCy3Me_1   | -1086.18250515  | 0.547363   | 0.475911   |
|                                               | PCy3Me_2   | -1086.17989801  | 0.547649   | 0.477677   |
|                                               | PCy3Me_3   | -1086.17711924  | 0.548366   | 0.479758   |
| PBu <sub>3</sub> Me <sup>+</sup>              | PBu3Me_1   | -854.10872367   | 0.433731   | 0.362408   |
|                                               | PBu3Me_2   | -854.10616798   | 0.434102   | 0.364755   |
|                                               | PBu3Me_3   | -854.10843314   | 0.433723   | 0.363633   |

### 6.3.5 Zwitterions formed by the addition of PR<sub>3</sub> to ethyl acrylate (1)

**Table S55.** Computed properties of zwitterionic adducts from the reaction of PR<sub>3</sub> with **1** in dichloromethane. Entropic contributions have been corrected to the reference state.  $\Delta H^*$  refers to thermal correction to enthalpy with the Head-Gordon correction and  $\Delta G^*$  to the thermal correction to Gibbs Free Energy including the Grimme method. Level of theory: SMD(DCM)/MN15/def2-TZVPP. Energies are given in Hartree

| Zwitterion                    | Conformers | $E_{tot}$      | $\Delta H$ | $\Delta H^*$ | $\Delta G$ | $\Delta G^*$ |
|-------------------------------|------------|----------------|------------|--------------|------------|--------------|
| <b>1</b> _PMe <sub>3</sub>    | 1_PMe3_1   | -806.421429391 | 0.257208   | 0.251944     | 0.198262   | 0.198177     |
|                               | 1_PMe3_2   | -806.421720571 | 0.257200   | 0.252108     | 0.198437   | 0.198637     |
|                               | 1_PMe3_3   | -806.421325783 | 0.257209   | 0.251980     | 0.198539   | 0.198528     |
| <b>1</b> _PPhMe <sub>2</sub>  | 1_PPhMe2_1 | -997.990027125 | 0.314354   | 0.308382     | 0.247367   | 0.248074     |
|                               | 1_PPhMe2_2 | -997.989581932 | 0.314406   | 0.308308     | 0.247253   | 0.247768     |
|                               | 1_PPhMe2_3 | -997.987637690 | 0.314367   | 0.308493     | 0.248168   | 0.248619     |
| <b>1</b> _PPh <sub>2</sub> Me | 1_PPh2Me_1 | -1189.55673742 | 0.371729   | 0.364701     | 0.296721   | 0.297566     |
|                               | 1_PPh2Me_2 | -1189.55648592 | 0.371442   | 0.364582     | 0.296906   | 0.297692     |
|                               | 1_PPh2Me_3 | -1189.55553959 | 0.371831   | 0.364861     | 0.297678   | 0.298189     |
| <b>1</b> _PPh <sub>3</sub>    | 1_PPh3_1   | -1381.12364618 | 0.428880   | 0.421069     | 0.346153   | 0.347618     |
|                               | 1_PPh3_2   | -1381.12381024 | 0.428759   | 0.420932     | 0.347417   | 0.348143     |
|                               | 1_PPh3_3   | -1381.12281149 | 0.428620   | 0.420714     | 0.347039   | 0.347706     |
| <b>1</b> _P(ani) <sub>3</sub> | 1_Pani3_1  | -1724.48895740 | 0.534613   | 0.525534     | 0.436302   | 0.437361     |
|                               | 1_Pani3_2  | -1724.48888097 | 0.534533   | 0.525363     | 0.436382   | 0.437451     |
|                               | 1_Pani3_3  | -1724.48895257 | 0.534656   | 0.525616     | 0.436643   | 0.437807     |
| <b>1</b> _P(pfp) <sub>3</sub> | 1_Ppfp3_1  | -1678.75568150 | 0.406357   | 0.398114     | 0.319041   | 0.320009     |
|                               | 1_Ppfp3_2  | -1678.75647043 | 0.406491   | 0.398279     | 0.320279   | 0.320864     |
|                               | 1_Ppfp3_3  | -1678.75461434 | 0.406331   | 0.398482     | 0.320081   | 0.320966     |
| <b>1</b> _PCy <sub>3</sub>    | 1_PCy3_1   | -1391.96719807 | 0.640272   | 0.632395     | 0.553451   | 0.553488     |
|                               | 1_PCy3_2   | -1391.96590629 | 0.640441   | 0.632688     | 0.554257   | 0.554169     |
|                               | 1_PCy3_3   | -1391.96417926 | 0.640144   | 0.632379     | 0.553937   | 0.553828     |
| <b>1</b> _PBu <sub>3</sub>    | 1_PBu3_1   | -1159.89702071 | 0.526147   | 0.517545     | 0.437763   | 0.438823     |
|                               | 1_PBu3_2   | -1159.89644720 | 0.526218   | 0.517655     | 0.438515   | 0.439071     |
|                               | 1_PBu3_3   | -1159.89728687 | 0.525781   | 0.517750     | 0.440605   | 0.440506     |

### 6.3.6 Zwitterions formed by the addition of PR<sub>3</sub> to ethyl allenoate (2)

**Table S56.** Computed properties of zwitterionic adducts from the reaction of PR<sub>3</sub> with **2** in dichloromethane. Entropic contributions have been corrected to the reference state.  $\Delta H^*$  refers to thermal correction to enthalpy with the Head-Gordon correction and  $\Delta G^*$  to the thermal correction to Gibbs Free Energy including the Grimme method. Level of theory: SMD(DCM)/MN15/def2-TZVPP. Energies are given in Hartree

| Zwitterion                    | Conformers | $E_{tot}$      | $\Delta H$ | $\Delta H^*$ | $\Delta G$ | $\Delta G^*$ |
|-------------------------------|------------|----------------|------------|--------------|------------|--------------|
| <b>2</b> _PMe <sub>3</sub>    | 2_PMe3_1   | -844.484097410 | 0.264124   | 0.258788     | 0.204585   | 0.204236     |
|                               | 2_PMe3_2   | -844.483906463 | 0.264318   | 0.261298     | 0.204852   | 0.204557     |
|                               | 2_PMe3_3   | -844.483659612 | 0.264217   | 0.261198     | 0.204778   | 0.204651     |
| <b>2</b> _PPhMe <sub>2</sub>  | 2_PPhMe2_1 | -1036.05323940 | 0.320894   | 0.314854     | 0.253764   | 0.254088     |
|                               | 2_PPhMe2_2 | -1036.05291661 | 0.321004   | 0.314854     | 0.254027   | 0.254088     |
|                               | 2_PPhMe2_3 | -1036.05272585 | 0.321037   | 0.315044     | 0.253989   | 0.254205     |
| <b>2</b> _PPh <sub>2</sub> Me | 2_PPh2Me_1 | -1227.62047827 | 0.377967   | 0.370903     | 0.302115   | 0.302969     |
|                               | 2_PPh2Me_2 | -1227.62004551 | 0.378042   | 0.370770     | 0.301725   | 0.302364     |
|                               | 2_PPh2Me_3 | -1227.62061987 | 0.378014   | 0.371038     | 0.303485   | 0.303720     |
| <b>2</b> _PPh <sub>3</sub>    | 2_PPh3_1   | -1419.18866679 | 0.434760   | 0.426829     | 0.352832   | 0.353201     |
|                               | 2_PPh3_2   | -1419.18783109 | 0.434887   | 0.426905     | 0.352175   | 0.352914     |
|                               | 2_PPh3_3   | -1419.18775721 | 0.434961   | 0.426955     | 0.352349   | 0.352811     |
| <b>2</b> _P(ani) <sub>3</sub> | 2_Pani3_1  | -1762.55174181 | 0.540694   | 0.531163     | 0.439998   | 0.441188     |
|                               | 2_Pani3_2  | -1762.55143839 | 0.540753   | 0.531270     | 0.439937   | 0.441234     |
|                               | 2_Pani3_3  | -1762.55263702 | 0.540673   | 0.531437     | 0.441389   | 0.442354     |
| <b>2</b> _P(pfp) <sub>3</sub> | 2_Ppfp3_1  | -1716.82122520 | 0.412490   | 0.404224     | 0.324393   | 0.325290     |
|                               | 2_Ppfp3_2  | -1716.82029678 | 0.412594   | 0.404199     | 0.323881   | 0.324757     |
|                               | 2_Ppfp3_3  | -1716.82029682 | 0.412592   | 0.404198     | 0.323887   | 0.324759     |
| <b>2</b> _PCy <sub>3</sub>    | 2_PCy3_1   | -1430.02403460 | 0.647028   | 0.639309     | 0.558502   | 0.558957     |
|                               | 2_PCy3_2   | -1430.02419448 | 0.646941   | 0.639188     | 0.558993   | 0.559129     |
|                               | 2_PCy3_3   | -1430.02392667 | 0.646937   | 0.639117     | 0.558869   | 0.558763     |
| <b>2</b> _PBu <sub>3</sub>    | 2_PBu3_1   | -1197.96159391 | 0.532445   | 0.523744     | 0.443088   | 0.443617     |
|                               | 2_PBu3_2   | -1197.96042697 | 0.532820   | 0.524236     | 0.444226   | 0.444754     |
|                               | 2_PBu3_3   | -1197.96015752 | 0.532792   | 0.524175     | 0.444289   | 0.444831     |

### 6.3.7 Zwitterions formed by the addition of PR<sub>3</sub> to ethyl propiolate (3)

**Table S57.** Computed properties of zwitterionic adducts from the reaction of PR<sub>3</sub> with **3** in dichloromethane. Entropic contributions have been corrected to the reference state.  $\Delta H^*$  refers to thermal correction to enthalpy with the Head-Gordon correction and  $\Delta G^*$  to the thermal correction to Gibbs Free Energy including the Grimme method. Level of theory: SMD(DCM)/MN15/def2-TZVPP. Energies are given in Hartree

| Zwitterion                    | Conformers | $E_{tot}$      | $\Delta H$ | $\Delta H^*$ | $\Delta G$ | $\Delta G^*$ |
|-------------------------------|------------|----------------|------------|--------------|------------|--------------|
| <b>3</b> _PMe <sub>3</sub>    | 3_PMe3_1   | -805.17899611  | 0.234492   | 0.229510     | 0.177159   | 0.177106     |
|                               | 3_PMe3_2   | -805.17900600  | 0.234589   | 0.229764     | 0.177979   | 0.177837     |
|                               | 3_PMe3_3   | -805.17852743  | 0.234550   | 0.229558     | 0.177715   | 0.177469     |
| <b>3</b> _PPhMe <sub>2</sub>  | 3_PPhMe2_1 | -996.74761931  | 0.291576   | 0.285777     | 0.225957   | 0.226496     |
|                               | 3_PPhMe2_2 | -996.74854334  | 0.291842   | 0.286268     | 0.227977   | 0.227978     |
|                               | 3_PPhMe2_3 | -996.74792494  | 0.291786   | 0.286218     | 0.227535   | 0.227773     |
| <b>3</b> _PPh <sub>2</sub> Me | 3_PPh2Me_1 | -1188.31723484 | 0.348748   | 0.342146     | 0.277272   | 0.277182     |
|                               | 3_PPh2Me_2 | -1188.31698715 | 0.348727   | 0.341891     | 0.276212   | 0.276567     |
|                               | 3_PPh2Me_3 | -1188.31591222 | 0.348851   | 0.341976     | 0.275419   | 0.276139     |
| <b>3</b> _PPh <sub>3</sub>    | 3_PPh3_1   | -1379.88584865 | 0.405847   | 0.398077     | 0.325896   | 0.326231     |
|                               | 3_PPh3_2   | -1379.88482065 | 0.405783   | 0.397896     | 0.325207   | 0.325834     |
|                               | 3_PPh3_3   | -1379.88482080 | 0.405782   | 0.397895     | 0.325215   | 0.325838     |
| <b>3</b> _P(ani) <sub>3</sub> | 3_Pani3_1  | -1723.24975688 | 0.511504   | 0.502475     | 0.413817   | 0.415050     |
|                               | 3_Pani3_2  | -1723.25027535 | 0.511715   | 0.502352     | 0.413145   | 0.414560     |
|                               | 3_Pani3_3  | -1723.24956702 | 0.511511   | 0.502321     | 0.413092   | 0.414620     |
| <b>3</b> _P(pfp) <sub>3</sub> | 3_Ppfp3_1  | -1677.51681629 | 0.382975   | 0.374704     | 0.294657   | 0.296482     |
|                               | 3_Ppfp3_2  | -1677.51806945 | 0.383320   | 0.375110     | 0.296869   | 0.297752     |
|                               | 3_Ppfp3_3  | -1677.51604561 | 0.383245   | 0.374964     | 0.295965   | 0.297241     |
| <b>3</b> _PCy <sub>3</sub>    | 3_PCy3_1   | -1390.72795325 | 0.616924   | 0.608939     | 0.529846   | 0.530236     |
|                               | 3_PCy3_2   | -1390.72833730 | 0.617109   | 0.609158     | 0.530917   | 0.530843     |
|                               | 3_PCy3_3   | -1390.72761302 | 0.617301   | 0.609438     | 0.531680   | 0.531502     |
| <b>3</b> _PBu <sub>3</sub>    | 3_PBu3_1   | -1158.65802050 | 0.503091   | 0.494793     | 0.417834   | 0.418188     |
|                               | 3_PBu3_2   | -1158.65594975 | 0.503232   | 0.494877     | 0.416085   | 0.417349     |
|                               | 3_PBu3_3   | -1158.65890102 | 0.503460   | 0.495474     | 0.420110   | 0.419841     |

### 6.3.8 Transition state (TS) properties for additions of PR<sub>3</sub> to acrylate 1

**Table S58.** Computed TS properties for additions of PR<sub>3</sub> to **1**. Entropic contributions have been corrected to the reference state.  $\Delta H^*$  refers to thermal correction to enthalpy with the Head-Gordon correction and  $\Delta G^*$  to the thermal correction to Gibbs Free Energy including the Grimme method. Level of theory: SMD(DCM)/MN15/def2-TZVPP. Energies are given in Hartree

| Zwitterion                       | Conformers                 | $E_{tot}$      | $\Delta H$ | $\Delta H^*$ | $\Delta G$ | $\Delta G^*$ |
|----------------------------------|----------------------------|----------------|------------|--------------|------------|--------------|
| <b>1</b> _TS_PMe <sub>3</sub>    | 1_TS_PMe <sub>3</sub> _1   | -806.398954608 | 0.256299   | 0.254080     | 0.197519   | 0.197474     |
|                                  | 1_TS_PMe <sub>3</sub> _2   | -806.399273016 | 0.256325   | 0.254228     | 0.198551   | 0.198331     |
|                                  | 1_TS_PMe <sub>3</sub> _3   | -806.398614487 | 0.256373   | 0.254161     | 0.197771   | 0.197865     |
| <b>1</b> _TS_PPhMe <sub>2</sub>  | 1_TS_PPhMe <sub>2</sub> _1 | -997.971291242 | 0.313627   | 0.310608     | 0.246380   | 0.247145     |
|                                  | 1_TS_PPhMe <sub>2</sub> _2 | -997.971646071 | 0.313749   | 0.310873     | 0.247967   | 0.248321     |
|                                  | 1_TS_PPhMe <sub>2</sub> _3 | -997.970967416 | 0.313852   | 0.310863     | 0.247647   | 0.248154     |
| <b>1</b> _TS_PPh <sub>2</sub> Me | 1_TS_PPh <sub>2</sub> Me_1 | -1189.54149527 | 0.370714   | 0.366632     | 0.294936   | 0.296335     |
|                                  | 1_TS_PPh <sub>2</sub> Me_2 | -1189.54244427 | 0.370634   | 0.366652     | 0.296243   | 0.297111     |
|                                  | 1_TS_PPh <sub>2</sub> Me_3 | -1189.54278607 | 0.370527   | 0.366730     | 0.297213   | 0.297759     |
| <b>1</b> _TS_PPh <sub>3</sub>    | 1_TS_PPh <sub>3</sub> _1   | -1381.11447355 | 0.427499   | 0.422502     | 0.345663   | 0.346585     |
|                                  | 1_TS_PPh <sub>3</sub> _2   | -1381.11357390 | 0.427683   | 0.422470     | 0.344987   | 0.346294     |
|                                  | 1_TS_PPh <sub>3</sub> _3   | -1381.11207388 | 0.427819   | 0.422831     | 0.345640   | 0.346783     |
| <b>1</b> _TS_P(ani) <sub>3</sub> | 1_TS_Pani <sub>3</sub> _1  | -1724.47753236 | 0.533328   | 0.526967     | 0.433814   | 0.435516     |
|                                  | 1_TS_Pani <sub>3</sub> _2  | -1724.47752156 | 0.533324   | 0.527139     | 0.434804   | 0.436115     |
|                                  | 1_TS_Pani <sub>3</sub> _3  | -1724.47763829 | 0.533379   | 0.527268     | 0.435358   | 0.43649      |
| <b>1</b> _TS_P(pfp) <sub>3</sub> | 1_TS_Ppfp <sub>3</sub> _1  | -1678.74758955 | 0.405228   | 0.3968       | 0.317352   | 0.318732     |
|                                  | 1_TS_Ppfp <sub>3</sub> _2  | -1678.74732263 | 0.405142   | 0.396774     | 0.317576   | 0.318748     |
|                                  | 1_TS_Ppfp <sub>3</sub> _3  | -1678.74627356 | 0.405254   | 0.39674      | 0.316856   | 0.318418     |
| <b>1</b> _TS_PCy <sub>3</sub>    | 1_TS_PCy <sub>3</sub> _1   | -1391.94658338 | 0.638499   | 0.633388     | 0.550105   | 0.550697     |
|                                  | 1_TS_PCy <sub>3</sub> _2   | -1391.94665249 | 0.638599   | 0.633509     | 0.551000   | 0.551412     |
|                                  | 1_TS_PCy <sub>3</sub> _3   | -1391.94677564 | 0.638517   | 0.633563     | 0.551713   | 0.551838     |
| <b>1</b> _TS_PBu <sub>3</sub>    | 1_TS_PBu <sub>3</sub> _1   | -1159.87597217 | 0.524157   | 0.518243     | 0.434511   | 0.435687     |
|                                  | 1_TS_PBu <sub>3</sub> _2   | -1159.87553872 | 0.524393   | 0.518547     | 0.435530   | 0.436641     |
|                                  | 1_TS_PBu <sub>3</sub> _3   | -1159.87489326 | 0.524299   | 0.518457     | 0.435010   | 0.435893     |

### 6.3.9 Transition state (TS) properties for additions of PR<sub>3</sub> to allenolate 2

**Table S59.** Computed TS properties for additions of PR<sub>3</sub> to **2**. Entropic contributions have been corrected to the reference state.  $\Delta H^*$  refers to thermal correction to enthalpy with the Head-Gordon correction and  $\Delta G^*$  to the thermal correction to Gibbs Free Energy including the Grimme method. Level of theory: SMD(DCM)/MN15/def2-TZVPP. Energies are given in Hartree

| Zwitterion                       | Conformers                 | $E_{tot}$      | $\Delta H$ | $\Delta H^*$ | $\Delta G$ | $\Delta G^*$ |
|----------------------------------|----------------------------|----------------|------------|--------------|------------|--------------|
| <b>2</b> _TS_PMe <sub>3</sub>    | 2_TS_PMe <sub>3</sub> _1   | -844.434359958 | 0.260185   | 0.258348     | 0.198671   | 0.198802     |
|                                  | 2_TS_PMe <sub>3</sub> _2   | -844.433924973 | 0.261157   | 0.258334     | 0.198678   | 0.198932     |
|                                  | 2_TS_PMe <sub>3</sub> _3   | -844.434677659 | 0.261092   | 0.258420     | 0.199582   | 0.199503     |
| <b>2</b> _TS_PPhMe <sub>2</sub>  | 2_TS_PPhMe <sub>2</sub> _1 | -1036.00737233 | 0.318324   | 0.314759     | 0.246835   | 0.248002     |
|                                  | 2_TS_PPhMe <sub>2</sub> _2 | -1036.03314643 | 0.320003   | 0.316317     | 0.249537   | 0.249507     |
|                                  | 2_TS_PPhMe <sub>2</sub> _3 | -1036.00788462 | 0.318751   | 0.315546     | 0.250057   | 0.250466     |
| <b>2</b> _TS_PPh <sub>2</sub> Me | 2_TS_PPh <sub>2</sub> Me_1 | -1227.58123342 | 0.375584   | 0.371722     | 0.368703   | 0.300774     |
|                                  | 2_TS_PPh <sub>2</sub> Me_2 | -1227.58032109 | 0.375622   | 0.371468     | 0.368449   | 0.300387     |
|                                  | 2_TS_PPh <sub>2</sub> Me_3 | -1227.57804168 | 0.375867   | 0.371657     | 0.368638   | 0.300120     |
| <b>2</b> _TS_PPh <sub>3</sub>    | 2_TS_PPh <sub>3</sub> _1   | -1419.15392971 | 0.432513   | 0.427501     | 0.349004   | 0.349786     |
|                                  | 2_TS_PPh <sub>3</sub> _2   | -1419.15196320 | 0.432645   | 0.427195     | 0.347404   | 0.348739     |
|                                  | 2_TS_PPh <sub>3</sub> _3   | -1419.15248671 | 0.432682   | 0.427513     | 0.349940   | 0.350254     |
| <b>2</b> _TS_P(ani) <sub>3</sub> | 2_TS_Pani <sub>3</sub> _1  | -1762.51547431 | 0.538256   | 0.531852     | 0.437081   | 0.438541     |
|                                  | 2_TS_Pani <sub>3</sub> _2  | -1762.51597003 | 0.538393   | 0.532084     | 0.437765   | 0.439055     |
|                                  | 2_TS_Pani <sub>3</sub> _3  | -1762.51557423 | 0.538387   | 0.531954     | 0.437426   | 0.438781     |
| <b>2</b> _TS_P(pfp) <sub>3</sub> | 2_TS_Ppfp <sub>3</sub> _1  | -1716.78634108 | 0.410099   | 0.404686     | 0.319585   | 0.321207     |
|                                  | 2_TS_Ppfp <sub>3</sub> _2  | -1716.78484260 | 0.410114   | 0.404229     | 0.318162   | 0.320151     |
|                                  | 2_TS_Ppfp <sub>3</sub> _3  | -1716.78596861 | 0.410171   | 0.404572     | 0.319825   | 0.321134     |
| <b>2</b> _TS_PCy <sub>3</sub>    | 2_TS_PCy <sub>3</sub> _1   | -1429.98107662 | 0.643563   | 0.635430     | 0.554017   | 0.554044     |
|                                  | 2_TS_PCy <sub>3</sub> _2   | -1429.98124553 | 0.643652   | 0.635471     | 0.553762   | 0.554177     |
|                                  | 2_TS_PCy <sub>3</sub> _3   | -1429.98435508 | 0.643512   | 0.635131     | 0.552481   | 0.553169     |
| <b>2</b> _TS_PBu <sub>3</sub>    | 2_TS_PBu <sub>3</sub> _1   | -1197.91652972 | 0.529725   | 0.524392     | 0.442208   | 0.442517     |
|                                  | 2_TS_PBu <sub>3</sub> _2   | -1197.91408586 | 0.529622   | 0.524933     | 0.444916   | 0.444308     |
|                                  | 2_TS_PBu <sub>3</sub> _3   | -1197.91323843 | 0.529701   | 0.524764     | 0.444459   | 0.443782     |

### 6.3.10 Transition state (TS) properties for additions of PR<sub>3</sub> to propiolate **3**

**Table S60.** Computed TS properties for additions of PR<sub>3</sub> to **3**. Entropic contributions have been corrected to the reference state.  $\Delta H^*$  refers to thermal correction to enthalpy with the Head-Gordon correction and  $\Delta G^*$  to the thermal correction to Gibbs Free Energy including the Grimme method. Level of theory: SMD(DCM)/MN15/def2-TZVPP. Energies are given in Hartree

| Zwitterion                       | Conformers                 | $E_{tot}$      | $\Delta H$ | $\Delta H^*$ | $\Delta G$ | $\Delta G^*$ |
|----------------------------------|----------------------------|----------------|------------|--------------|------------|--------------|
| <b>3</b> _TS_PMe <sub>3</sub>    | 3_TS_PMe <sub>3</sub> _1   | -805.14255337  | 0.232306   | 0.230000     | 0.173475   | 0.173423     |
|                                  | 3_TS_PMe <sub>3</sub> _2   | -805.14310645  | 0.232317   | 0.230181     | 0.174190   | 0.174069     |
|                                  | 3_TS_PMe <sub>3</sub> _3   | -805.14219484  | 0.232402   | 0.230147     | 0.173870   | 0.173882     |
| <b>3</b> _TS_PPhMe <sub>2</sub>  | 3_TS_PPhMe <sub>2</sub> _1 | -996.71475825  | 0.289782   | 0.286616     | 0.222393   | 0.223173     |
|                                  | 3_TS_PPhMe <sub>2</sub> _2 | -996.71435899  | 0.289655   | 0.286517     | 0.222489   | 0.223283     |
|                                  | 3_TS_PPhMe <sub>2</sub> _3 | -996.71530297  | 0.289829   | 0.286847     | 0.223918   | 0.224291     |
| <b>3</b> _TS_PPh <sub>2</sub> Me | 3_TS_PPh <sub>2</sub> Me_1 | -1188.28829716 | 0.346681   | 0.342954     | 0.274056   | 0.274376     |
|                                  | 3_TS_PPh <sub>2</sub> Me_2 | -1188.28578521 | 0.346886   | 0.342872     | 0.272033   | 0.273074     |
|                                  | 3_TS_PPh <sub>2</sub> Me_3 | -1188.28747819 | 0.346686   | 0.342830     | 0.273793   | 0.274202     |
| <b>3</b> _TS_PPh <sub>3</sub>    | 3_TS_PPh <sub>3</sub> _1   | -1379.85872155 | 0.403588   | 0.398484     | 0.320689   | 0.322067     |
|                                  | 3_TS_PPh <sub>3</sub> _2   | -1379.85795367 | 0.403678   | 0.398455     | 0.321017   | 0.322246     |
|                                  | 3_TS_PPh <sub>3</sub> _3   | -1379.85725242 | 0.403516   | 0.398312     | 0.320698   | 0.321999     |
| <b>3</b> _TS_P(ani) <sub>3</sub> | 3_TS_Pani <sub>3</sub> _1  | -1723.22035187 | 0.509123   | 0.499531     | 0.406935   | 0.409711     |
|                                  | 3_TS_Pani <sub>3</sub> _2  | -1723.22046259 | 0.509233   | 0.499655     | 0.408725   | 0.410715     |
|                                  | 3_TS_Pani <sub>3</sub> _3  | -1723.22033792 | 0.509204   | 0.499597     | 0.409196   | 0.410876     |
| <b>3</b> _TS_P(pfp) <sub>3</sub> | 3_TS_Ppfp <sub>3</sub> _1  | -1677.49058211 | 0.380993   | 0.375400     | 0.291234   | 0.293297     |
|                                  | 3_TS_Ppfp <sub>3</sub> _2  | -1677.49060670 | 0.381193   | 0.375616     | 0.292189   | 0.293944     |
|                                  | 3_TS_Ppfp <sub>3</sub> _3  | -1677.49025285 | 0.381235   | 0.375726     | 0.293029   | 0.294459     |
| <b>3</b> _TS_PCy <sub>3</sub>    | 3_TS_PCy <sub>3</sub> _1   | -1390.69547386 | 0.614346   | 0.609409     | 0.528224   | 0.527935     |
|                                  | 3_TS_PCy <sub>3</sub> _2   | -1390.69411010 | 0.614246   | 0.609110     | 0.525933   | 0.526534     |
|                                  | 3_TS_PCy <sub>3</sub> _3   | -1390.69353514 | 0.614439   | 0.609353     | 0.527351   | 0.527407     |
| <b>3</b> _TS_PBu <sub>3</sub>    | 3_TS_PBu <sub>3</sub> _1   | -1158.62260571 | 0.500358   | 0.495140     | 0.413535   | 0.414489     |
|                                  | 3_TS_PBu <sub>3</sub> _2   | -1158.62260587 | 0.500360   | 0.495142     | 0.413562   | 0.414503     |
|                                  | 3_TS_PBu <sub>3</sub> _3   | -1158.62232994 | 0.500390   | 0.495077     | 0.413776   | 0.414582     |

### 6.3.11 NBO analysis

**Table S61.** NBO charges of the transition states of the additions of PPh<sub>3</sub> to **1**, **2**, or **3**. Level of theory: SMD(DCM)/MN15/def2-TZVPP

| 1-PPh <sub>3</sub> |        |          | 2-PPh <sub>3</sub> |        |          | 3-PPh <sub>3</sub> |        |          |                  |        |          |      |        |          |                  |        |          |
|--------------------|--------|----------|--------------------|--------|----------|--------------------|--------|----------|------------------|--------|----------|------|--------|----------|------------------|--------|----------|
| 1                  |        |          | PPh <sub>3</sub>   |        |          | 2                  |        |          | PPh <sub>3</sub> |        |          | 3    |        |          | PPh <sub>3</sub> |        |          |
| Atom               | Number | Charge   | Atom               | Number | Charge   | Atom               | Number | Charge   | Atom             | Number | Charge   | Atom | Number | Charge   | Atom             | Number | Charge   |
| C                  | 35     | -0.40169 | P                  | 1      | 1.25963  | C                  | 1      | -0.46429 | P                | 4      | 1.17676  | C    | 35     | -0.25306 | P                | 1      | 1.14952  |
| C                  | 36     | -0.52669 | C                  | 2      | -0.38779 | C                  | 2      | 0.08114  | C                | 10     | -0.37717 | C    | 36     | -0.23967 | C                | 2      | -0.37616 |
| C                  | 37     | 0.71758  | C                  | 3      | -0.38041 | C                  | 3      | -0.56226 | C                | 11     | -0.38394 | C    | 37     | 0.69173  | C                | 3      | -0.36951 |
| O                  | 38     | -0.72086 | C                  | 4      | -0.38892 | C                  | 5      | 0.74225  | C                | 12     | -0.37497 | O    | 38     | -0.65176 | C                | 4      | -0.37317 |
| O                  | 39     | -0.52071 | C                  | 5      | -0.19926 | O                  | 6      | -0.67630 | C                | 13     | -0.20494 | O    | 39     | -0.49811 | C                | 5      | -0.19764 |
| C                  | 40     | -0.08013 | C                  | 6      | -0.21254 | O                  | 7      | -0.52658 | C                | 14     | -0.21569 | C    | 40     | -0.08697 | C                | 6      | -0.21690 |
| C                  | 41     | -0.62421 | C                  | 7      | -0.20086 | C                  | 8      | -0.08094 | C                | 15     | -0.20248 | C    | 41     | -0.62617 | C                | 7      | -0.20261 |
| H                  | 42     | 0.22543  | C                  | 8      | -0.21236 | C                  | 9      | -0.62741 | C                | 16     | -0.21349 | H    | 42     | 0.23501  | C                | 8      | -0.21593 |
| H                  | 43     | 0.22188  | C                  | 9      | -0.19633 | H                  | 28     | 0.22240  | C                | 17     | -0.20095 | H    | 43     | 0.19316  | C                | 9      | -0.19269 |
| H                  | 44     | 0.18563  | C                  | 10     | -0.18966 | H                  | 29     | 0.23269  | C                | 18     | -0.19855 | H    | 44     | 0.19075  | C                | 10     | -0.20357 |
| H                  | 45     | 0.18009  | C                  | 11     | -0.22199 | H                  | 30     | 0.18846  | C                | 19     | -0.21330 | H    | 45     | 0.22228  | C                | 11     | -0.21240 |
| H                  | 46     | 0.21824  | C                  | 12     | -0.2062  | H                  | 31     | 0.18738  | C                | 20     | -0.20102 | H    | 46     | 0.21183  | C                | 12     | -0.20560 |
| H                  | 47     | 0.20877  | C                  | 13     | -0.22025 | H                  | 32     | 0.22236  | C                | 21     | -0.21345 | H    | 47     | 0.21477  | C                | 13     | -0.21140 |
| H                  | 48     | 0.21105  | C                  | 14     | -0.19423 | H                  | 33     | 0.21239  | C                | 22     | -0.19932 |      |        |          | C                | 14     | -0.20277 |
| H                  | 49     | 0.21416  | C                  | 15     | -0.19789 | H                  | 34     | 0.21109  | C                | 23     | -0.20560 |      |        |          | C                | 15     | -0.20551 |
|                    |        |          | C                  | 16     | -0.21468 | H                  | 50     | 0.24131  | C                | 24     | -0.21801 |      |        |          | C                | 16     | -0.21481 |
|                    |        |          | C                  | 17     | -0.2031  |                    |        |          | C                | 25     | -0.20929 |      |        |          | C                | 17     | -0.20631 |
|                    |        |          | C                  | 18     | -0.21298 |                    |        |          | C                | 26     | -0.21221 |      |        |          | C                | 18     | -0.21173 |
|                    |        |          | C                  | 19     | -0.21056 |                    |        |          | C                | 27     | -0.20591 |      |        |          | C                | 19     | -0.20810 |
|                    |        |          | H                  | 20     | 0.23016  |                    |        |          | H                | 35     | 0.23928  |      |        |          | H                | 20     | 0.23343  |
|                    |        |          | H                  | 21     | 0.23185  |                    |        |          | H                | 36     | 0.23123  |      |        |          | H                | 21     | 0.23093  |
|                    |        |          | H                  | 22     | 0.23021  |                    |        |          | H                | 37     | 0.22945  |      |        |          | H                | 22     | 0.22982  |
|                    |        |          | H                  | 23     | 0.23129  |                    |        |          | H                | 38     | 0.23025  |      |        |          | H                | 23     | 0.23150  |



|   |    |         |  |   |    |         |  |   |    |         |
|---|----|---------|--|---|----|---------|--|---|----|---------|
| H | 24 | 0.23403 |  | H | 39 | 0.23145 |  | H | 24 | 0.23230 |
| H | 25 | 0.23170 |  | H | 40 | 0.23013 |  | H | 25 | 0.22895 |
| H | 26 | 0.22955 |  | H | 41 | 0.23092 |  | H | 26 | 0.23106 |
| H | 27 | 0.22863 |  | H | 42 | 0.22962 |  | H | 27 | 0.22951 |
| H | 28 | 0.23070 |  | H | 43 | 0.23067 |  | H | 28 | 0.23034 |
| H | 29 | 0.23110 |  | H | 44 | 0.23227 |  | H | 29 | 0.23237 |
| H | 30 | 0.23113 |  | H | 45 | 0.23111 |  | H | 30 | 0.23073 |
| H | 31 | 0.22990 |  | H | 46 | 0.22967 |  | H | 31 | 0.22915 |
| H | 32 | 0.22889 |  | H | 47 | 0.22912 |  | H | 32 | 0.22846 |
| H | 33 | 0.23095 |  | H | 48 | 0.23179 |  | H | 33 | 0.23083 |
| H | 34 | 0.25175 |  | H | 49 | 0.23289 |  | H | 34 | 0.24411 |

### 6.3.12 Thermodynamics of allenoate and butynoate isomerisations

**Table S62.** Gas phase calculation performed at the DLPNO-CCSD(T)/def2-TZVP//MN15/def2-TZVPP level of theory.  $\Delta H^*$  refers to enthalpy correction according to Head-Gordon.  $\Delta G^*$  refers to entropy correction according to Grimme and have been corrected to a reference state of 1 mol L<sup>-1</sup> at 298.15 K.  $\Delta_f H^\circ$  values are according to active thermochemical tables.<sup>S36</sup>

| Molecule                                                                          | $E_{\text{tot}}$      | DLPNO-CCSD(T)  | $\Delta H$ | $\Delta H^*$ | $\Delta G$ | $\Delta G^*$ | MN15/def2-TZVPP                     |                   |                 |                   | DLPNO-CCSD(T)   |                   |                 |                   | $\Delta_f H^\circ$<br>(298 K) <sup>16</sup> |   |
|-----------------------------------------------------------------------------------|-----------------------|----------------|------------|--------------|------------|--------------|-------------------------------------|-------------------|-----------------|-------------------|-----------------|-------------------|-----------------|-------------------|---------------------------------------------|---|
|                                                                                   |                       |                |            |              |            |              | rel. $\Delta H$                     | rel. $\Delta H^*$ | rel. $\Delta G$ | rel. $\Delta G^*$ | rel. $\Delta H$ | rel. $\Delta H^*$ | rel. $\Delta G$ | rel. $\Delta G^*$ |                                             |   |
|                                                                                   | (energies in Hartree) |                |            |              |            |              | (energies in kJ mol <sup>-1</sup> ) |                   |                 |                   |                 |                   |                 |                   |                                             |   |
|  | -116.544998510        | -116.426243634 | 0.060937   | 0.060927     | 0.031981   | 0.034987     | 0                                   | 0                 | 0               | 0                 | 0               | 0                 | 0               | 0                 | 0                                           | 0 |
|  | -116.545912301        | -116.424131416 | 0.060108   | 0.060099     | 0.031289   | 0.034297     | -4.6                                | -4.6              | -4.2            | -4.2              | 3.4             | 3.4               | 3.7             | 3.7               | 4.4                                         |   |
|   | -383.555056757        | -383.203408203 | 0.139109   | 0.137588     | 0.091207   | 0.095025     | 0                                   | 0                 | 0               | 0                 | 0               | 0                 | 0               | 0                 | -                                           |   |
|   | -383.559837777        | -383.205891558 | 0.138106   | 0.136978     | 0.093903   | 0.096611     | -15.2                               | -14.2             | -5.5            | -8.4              | -9.2            | -8.1              | 0.6             | -2.4              | -                                           |   |

**Table S63.** Solvation was considered at the DLPNO-CCSD(T)/def2-TZVP//MN15-SMD(DCM)/def2-TZVPP level of theory.  $\Delta H^*$  refers to enthalpy correction according to Head-Gordon.  $\Delta G^*$  refers to entropy correction according to Grimme and have been corrected to a reference state of 1 mol/l at 298.15 K. Solv. refers to the solvation energy.

| Molecule                                                                            | $E_{\text{tot}}$      | DLPNO-CCSD(T)  | $\Delta H$ | $\Delta H^*$ | $\Delta G$ | $\Delta G^*$ | Solv.        | MN15/def2-TZVPP                     |                   |                 |                   | DLPNO-CCSD(T)   |                   |                 |                   |
|-------------------------------------------------------------------------------------|-----------------------|----------------|------------|--------------|------------|--------------|--------------|-------------------------------------|-------------------|-----------------|-------------------|-----------------|-------------------|-----------------|-------------------|
|                                                                                     |                       |                |            |              |            |              |              | rel. $\Delta H$                     | rel. $\Delta H^*$ | rel. $\Delta G$ | rel. $\Delta G^*$ | rel. $\Delta H$ | rel. $\Delta H^*$ | rel. $\Delta G$ | rel. $\Delta G^*$ |
|                                                                                     | (energies in Hartree) |                |            |              |            |              |              | (energies in kJ mol <sup>-1</sup> ) |                   |                 |                   |                 |                   |                 |                   |
|   | -116.551073181        | -116.426334846 | 0.060742   | 0.060732     | 0.031801   | 0.034807     | -0.006095264 | 0                                   | 0                 | 0               | 0                 | 0               | 0                 | 0               | 0                 |
|  | -116.549972995        | -116.424191030 | 0.059911   | 0.059902     | 0.031082   | 0.03409      | -0.004067023 | -15.2                               | -14.2             | -5.5            | -8.4              | -9.2            | -8.1              | 0.6             | -2.4              |
|   | -383.567809949        | -383.203408203 | 0.138776   | 0.137266     | 0.092801   | 0.095655     | -0.012904003 | 0                                   | 0                 | 0               | 0                 | 0               | 0                 | 0               | 0                 |
|   | -383.571065782        | -383.205824149 | 0.137811   | 0.136721     | 0.093766   | 0.096446     | -0.011354957 | -11.1                               | -10.0             | -6.0            | -6.5              | -4.8            | -3.7              | 0.3             | -0.2              |

### 6.3.13 Theoretical pK<sub>aH</sub> value prediction

Theoretical pK<sub>aH</sub> values were determined according to Equation (S1) based on ΔG<sub>sol</sub> values as defined in reaction Equation (S2).

$$pK_{aH}(PR_3) = pK_{aH}(PPh_3, 2.73) + \frac{\Delta G_{sol}}{2.303RT} \quad (S1)$$

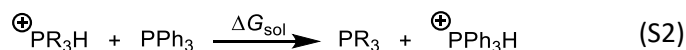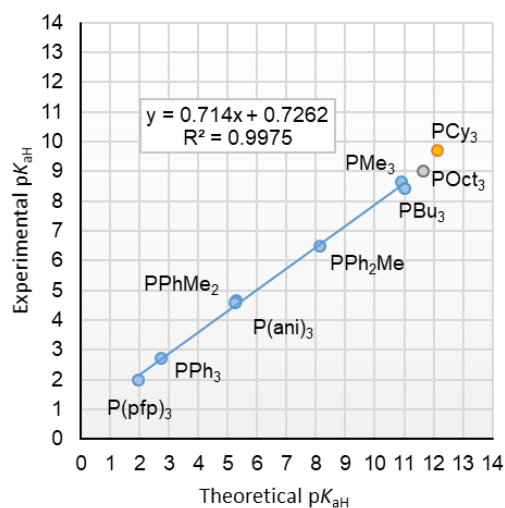

**Fig. S29.** Correlation between experimental pK<sub>aH</sub> and quantum-chemically calculated pK<sub>aH</sub> (level of theory: SMD(H<sub>2</sub>O)/MN15/def2-TZVPP).

**Table S64.** Quantum-chemically calculated and experimental pK<sub>aH</sub> values in H<sub>2</sub>O. Level of theory: SMD(H<sub>2</sub>O)/MN15/def2-TZVPP

| Phosphine           | Experimental pK <sub>aH</sub> <sup>a</sup> | Theoretical pK <sub>aH</sub> | Predicted pK <sub>aH</sub> |
|---------------------|--------------------------------------------|------------------------------|----------------------------|
| PMe <sub>3</sub>    | 8.65                                       | 10.92                        | -                          |
| PPhMe <sub>2</sub>  | 6.49                                       | 8.15                         | -                          |
| PPh <sub>2</sub> Me | 4.65                                       | 5.31                         | -                          |
| PPh <sub>3</sub>    | 2.73                                       | 2.73                         | -                          |
| P(ani) <sub>3</sub> | 4.57                                       | 5.27                         | -                          |
| P(pfp) <sub>3</sub> | 1.97                                       | 1.98                         | -                          |
| PCy <sub>3</sub>    | 9.70                                       | (12.14) <sup>b</sup>         | -                          |
| PBU <sub>3</sub>    | 8.43                                       | 11.03                        | -                          |
| POct <sub>3</sub>   | -                                          | 11.63                        | 9.03 <sup>c</sup>          |

<sup>a</sup> Experimental pK<sub>aH</sub> of tertiary phosphines from ref. S1. <sup>b</sup> Data for PCy<sub>3</sub> was excluded when calculating the correlation equation in Fig. S29. <sup>c</sup> Extrapolated from the correlation equation in Fig. S29.

### 6.3.14 Activation strain analysis for reactions of PPh<sub>3</sub> with 1, 2, or 3

**Table S65.** Energy strain analysis of the PPh<sub>3</sub> addition to **1**. Level of theory: SMD(DCM)/MN15/def2-TZVPP. RC refers to reactant complex and PC to product complex. Energies are given in Hartree

| Step                 | P-C     | $E_{\text{tot}}$ | SP <sub>1</sub> | SP <sub>PPh3</sub> | SP <sub>1+PPh3</sub> | $E_{\text{tot}} - \text{SP}_{1+PPh3}$ |
|----------------------|---------|------------------|-----------------|--------------------|----------------------|---------------------------------------|
| OPT RC               | 4.02059 | -1381.13800117   | -345.533145772  | -1035.59509257     | -1381.128238342      | -0.00976283                           |
| OPT <b>1</b>         | -       | -345.533372803   | -               | -                  | -                    | -                                     |
| OPT PPh <sub>3</sub> | -       | -1035.59515116   | -               | -                  | -                    | -                                     |
| 1                    | 3.47720 | -1381.13379866   | -345.533251402  | -1035.59339244     | -1381.126643842      | -0.00715482                           |
| 2                    | 3.46990 | -1381.13371180   | -345.533248024  | -1035.59334385     | -1381.126591874      | -0.00711993                           |
| 3                    | 3.46208 | -1381.13362413   | -345.533245127  | -1035.59329511     | -1381.126540237      | -0.00708389                           |
| 4                    | 3.45447 | -1381.13353439   | -345.533242139  | -1035.59324513     | -1381.126487269      | -0.00704712                           |
| 5                    | 3.44692 | -1381.13344335   | -345.533238457  | -1035.59319440     | -1381.126432857      | -0.00701049                           |
| 6                    | 3.43971 | -1381.13335116   | -345.533235656  | -1035.59314248     | -1381.126378136      | -0.00697302                           |
| 7                    | 3.43201 | -1381.13325694   | -345.533232337  | -1035.59309053     | -1381.126322867      | -0.00693407                           |
| 8                    | 3.42399 | -1381.13316142   | -345.533229353  | -1035.59303815     | -1381.126267503      | -0.00689392                           |
| 9                    | 3.41537 | -1381.13306478   | -345.533225470  | -1035.59298607     | -1381.126211540      | -0.00685324                           |
| 10                   | 3.40705 | -1381.13296602   | -345.533221158  | -1035.59293299     | -1381.126154148      | -0.00681187                           |
| 11                   | 3.39881 | -1381.13286603   | -345.533216855  | -1035.59287959     | -1381.126096445      | -0.00676959                           |
| 12                   | 3.39102 | -1381.13276485   | -345.533213787  | -1035.59282575     | -1381.126039537      | -0.00672531                           |
| 13                   | 3.38272 | -1381.13266146   | -345.533209903  | -1035.59277339     | -1381.125983293      | -0.00667817                           |
| 14                   | 3.37406 | -1381.13255677   | -345.533205778  | -1035.59272209     | -1381.125927868      | -0.00662890                           |
| 15                   | 3.36477 | -1381.13245086   | -345.533200241  | -1035.59267234     | -1381.125872581      | -0.00657828                           |
| 16                   | 3.35583 | -1381.13234261   | -345.533194656  | -1035.59262231     | -1381.125816966      | -0.00652564                           |
| 17                   | 3.34697 | -1381.13223299   | -345.533189141  | -1035.59257282     | -1381.125761961      | -0.00647103                           |
| 18                   | 3.33857 | -1381.13212188   | -345.533185130  | -1035.59252309     | -1381.125708220      | -0.00641366                           |
| 19                   | 3.32961 | -1381.13200829   | -345.533180062  | -1035.59247461     | -1381.125654672      | -0.00635362                           |
| 20                   | 3.32027 | -1381.13189321   | -345.533174154  | -1035.59242665     | -1381.125600804      | -0.00629241                           |
| 21                   | 3.31025 | -1381.13177651   | -345.533166580  | -1035.59237983     | -1381.125546410      | -0.00623010                           |
| 22                   | 3.30056 | -1381.13165716   | -345.533158805  | -1035.59233255     | -1381.125491355      | -0.00616580                           |
| 23                   | 3.29090 | -1381.13153616   | -345.533151741  | -1035.59228558     | -1381.125437321      | -0.00609884                           |
| 24                   | 3.28164 | -1381.13141311   | -345.533146267  | -1035.59223796     | -1381.125384227      | -0.00602888                           |
| 25                   | 3.27173 | -1381.13128711   | -345.533139920  | -1035.59219124     | -1381.125331160      | -0.00595595                           |
| 26                   | 3.25035 | -1381.13102831   | -345.533123012  | -1035.59210011     | -1381.125223122      | -0.00580519                           |
| 27                   | 3.23963 | -1381.13089431   | -345.533113571  | -1035.59205623     | -1381.125169801      | -0.00572451                           |
| 28                   | 3.22907 | -1381.13075655   | -345.533106837  | -1035.59201533     | -1381.125122167      | -0.00563438                           |
| 29                   | 3.21710 | -1381.13061664   | -345.533093116  | -1035.59197697     | -1381.125070086      | -0.00554655                           |
| 30                   | 3.20549 | -1381.13047189   | -345.533081516  | -1035.59193724     | -1381.125018756      | -0.00545313                           |
| 31                   | 3.19378 | -1381.13032432   | -345.533069915  | -1035.59189573     | -1381.124965645      | -0.00535868                           |
| 32                   | 3.18248 | -1381.13017283   | -345.533063097  | -1035.59185137     | -1381.124914467      | -0.00525836                           |
| 33                   | 3.17040 | -1381.13001610   | -345.533051035  | -1035.59180806     | -1381.124859095      | -0.00515701                           |
| 34                   | 3.15783 | -1381.12985599   | -345.533037368  | -1035.59176855     | -1381.124805918      | -0.00505007                           |
| 35                   | 3.14458 | -1381.12969176   | -345.533016645  | -1035.59173434     | -1381.124750985      | -0.00494078                           |
| 36                   | 3.13164 | -1381.12952208   | -345.533000246  | -1035.59170240     | -1381.124702646      | -0.00481943                           |
| 37                   | 3.11861 | -1381.12934857   | -345.532982473  | -1035.59167323     | -1381.124655703      | -0.00469287                           |
| 38                   | 3.10578 | -1381.12917014   | -345.532969439  | -1035.59164619     | -1381.124615629      | -0.00455451                           |
| 39                   | 3.09241 | -1381.12898604   | -345.532947630  | -1035.59161922     | -1381.124566850      | -0.00441919                           |

|    |         |                |                |                |                 |             |
|----|---------|----------------|----------------|----------------|-----------------|-------------|
| 40 | 3.07871 | -1381.12879727 | -345.532926328 | -1035.59158940 | -1381.124515728 | -0.00428154 |
| 41 | 3.06464 | -1381.12860253 | -345.532897107 | -1035.59155355 | -1381.124450657 | -0.00415187 |
| 42 | 3.05065 | -1381.12840098 | -345.532876796 | -1035.59151568 | -1381.124392476 | -0.00400850 |
| 43 | 3.03652 | -1381.12819413 | -345.532850702 | -1035.59147857 | -1381.124329272 | -0.00386486 |
| 44 | 3.02221 | -1381.12797942 | -345.532827929 | -1035.59144710 | -1381.124275029 | -0.00370439 |
| 45 | 3.00768 | -1381.12775738 | -345.532789762 | -1035.59141585 | -1381.124205612 | -0.00355177 |
| 46 | 2.99286 | -1381.12752985 | -345.532757618 | -1035.59138950 | -1381.124147118 | -0.00338273 |
| 47 | 2.97813 | -1381.12729216 | -345.532717165 | -1035.59136404 | -1381.124081205 | -0.00321095 |
| 48 | 2.96317 | -1381.12704816 | -345.532690220 | -1035.59134955 | -1381.124039770 | -0.00300839 |
| 49 | 2.94812 | -1381.12679709 | -345.532639531 | -1035.59133481 | -1381.123974341 | -0.00282275 |
| 50 | 2.93292 | -1381.12653471 | -345.532603331 | -1035.59131849 | -1381.123921821 | -0.00261289 |
| 51 | 2.91758 | -1381.12626639 | -345.532555836 | -1035.59129677 | -1381.123852606 | -0.00241378 |
| 52 | 2.90167 | -1381.12598560 | -345.532492593 | -1035.59127488 | -1381.123767473 | -0.00221813 |
| 53 | 2.88605 | -1381.12570035 | -345.532418852 | -1035.59124297 | -1381.123661822 | -0.00203853 |
| 54 | 2.87018 | -1381.12540505 | -345.532358206 | -1035.59121225 | -1381.123570456 | -0.00183459 |
| 55 | 2.85416 | -1381.12509759 | -345.532272254 | -1035.59117711 | -1381.123449364 | -0.00164823 |
| 56 | 2.83784 | -1381.12478446 | -345.532174871 | -1035.59114133 | -1381.123316201 | -0.00146826 |
| 57 | 2.82244 | -1381.12446226 | -345.532123452 | -1035.59109505 | -1381.123218502 | -0.00124376 |
| 58 | 2.80611 | -1381.12412908 | -345.532037387 | -1035.59105929 | -1381.123096677 | -0.00103240 |
| 59 | 2.78974 | -1381.12378906 | -345.531922487 | -1035.59102018 | -1381.122942667 | -0.00084639 |
| 60 | 2.77329 | -1381.12343856 | -345.531819041 | -1035.59098247 | -1381.122801511 | -0.00063705 |
| 61 | 2.75669 | -1381.12307918 | -345.531694283 | -1035.59094311 | -1381.122637393 | -0.00044179 |
| 62 | 2.73997 | -1381.12271145 | -345.531563703 | -1035.59090330 | -1381.122467003 | -0.00024445 |
| 63 | 2.72313 | -1381.12233573 | -345.531417304 | -1035.59086206 | -1381.122279364 | -0.00005637 |
| 64 | 2.70617 | -1381.12195251 | -345.531257753 | -1035.59081858 | -1381.122076333 | 0.00012382  |
| 65 | 2.68908 | -1381.12156236 | -345.531081774 | -1035.59077346 | -1381.121855234 | 0.00029287  |
| 66 | 2.67185 | -1381.12116595 | -345.530887910 | -1035.59072754 | -1381.121615450 | 0.00044950  |
| 67 | 2.65447 | -1381.12076402 | -345.530673291 | -1035.59068056 | -1381.121353851 | 0.00058983  |
| 68 | 2.63694 | -1381.12035740 | -345.530436779 | -1035.59063264 | -1381.121069419 | 0.00071202  |
| 69 | 2.61925 | -1381.11994702 | -345.530172800 | -1035.59058405 | -1381.120756850 | 0.00080983  |
| 70 | 2.60138 | -1381.11953398 | -345.529878428 | -1035.59053507 | -1381.120413498 | 0.00087952  |
| 71 | 2.58333 | -1381.11911954 | -345.529551712 | -1035.59048550 | -1381.120037212 | 0.00091767  |
| 72 | 2.56508 | -1381.11870516 | -345.529186303 | -1035.59043669 | -1381.119622993 | 0.00091783  |
| 73 | 2.54662 | -1381.11829257 | -345.528777450 | -1035.59038819 | -1381.119165640 | 0.00087307  |
| 74 | 2.52794 | -1381.11788377 | -345.528320864 | -1035.59034170 | -1381.118662564 | 0.00077879  |
| 75 | 2.50904 | -1381.11748111 | -345.527808726 | -1035.59029721 | -1381.118105936 | 0.00062483  |
| 76 | 2.48991 | -1381.11708734 | -345.527236617 | -1035.59025539 | -1381.117492007 | 0.00040467  |
| 77 | 2.47055 | -1381.11670564 | -345.526596839 | -1035.59021723 | -1381.116814069 | 0.00010843  |
| 78 | 2.45097 | -1381.11633960 | -345.525884262 | -1035.59018250 | -1381.116066762 | -0.00027284 |
| 79 | 2.43117 | -1381.11599321 | -345.525091376 | -1035.59015246 | -1381.115243836 | -0.00074937 |
| 80 | 2.41116 | -1381.11567084 | -345.524210050 | -1035.59012591 | -1381.114335960 | -0.00133488 |
| 81 | 2.39095 | -1381.11537711 | -345.523236599 | -1035.59010432 | -1381.113340919 | -0.00203619 |
| 82 | 2.37057 | -1381.11511682 | -345.522166494 | -1035.59008587 | -1381.112252364 | -0.00286446 |
| 83 | 2.35002 | -1381.11489473 | -345.520993212 | -1035.59007079 | -1381.111064002 | -0.00383073 |
| 84 | 2.32934 | -1381.11471539 | -345.519717331 | -1035.59005959 | -1381.109776921 | -0.00493847 |
| 85 | 2.30854 | -1381.11458303 | -345.518335996 | -1035.59005126 | -1381.108387256 | -0.00619577 |
| 86 | 2.28763 | -1381.11450138 | -345.516852966 | -1035.59004570 | -1381.106898666 | -0.00760271 |
| 87 | 2.26665 | -1381.11447355 | -345.515263540 | -1035.59004135 | -1381.105304890 | -0.00916866 |

|        |         |                |                |                |                 |             |
|--------|---------|----------------|----------------|----------------|-----------------|-------------|
| 88     | 2.24560 | -1381.11450185 | -345.513574957 | -1035.59003882 | -1381.103613777 | -0.01088807 |
| 89     | 2.22453 | -1381.11458747 | -345.511798809 | -1035.59003591 | -1381.101834719 | -0.01275275 |
| 90     | 2.20348 | -1381.11473038 | -345.509936926 | -1035.59003345 | -1381.099970376 | -0.01476000 |
| 91     | 2.18245 | -1381.11492931 | -345.508005535 | -1035.59003014 | -1381.098035675 | -0.01689364 |
| 92     | 2.16149 | -1381.11518182 | -345.506011646 | -1035.59002433 | -1381.096035976 | -0.01914584 |
| 93     | 2.14062 | -1381.11548439 | -345.503969505 | -1035.59001667 | -1381.093986175 | -0.02149821 |
| 94     | 2.11988 | -1381.11583242 | -345.501894833 | -1035.59000566 | -1381.091900493 | -0.02393193 |
| 95     | 2.09930 | -1381.11622005 | -345.499800396 | -1035.58999105 | -1381.089791446 | -0.02642860 |
| 96     | 2.07895 | -1381.11664009 | -345.497705423 | -1035.58997064 | -1381.087676063 | -0.02896403 |
| 97     | 2.05888 | -1381.11708400 | -345.495623159 | -1035.58994386 | -1381.085567019 | -0.03151698 |
| 98     | 2.03920 | -1381.11754213 | -345.493584453 | -1035.58990776 | -1381.083492213 | -0.03404992 |
| 99     | 2.01999 | -1381.11800415 | -345.491604649 | -1035.58985994 | -1381.081464589 | -0.03653956 |
| 100    | 2.00141 | -1381.11845979 | -345.489719056 | -1035.58979909 | -1381.079518146 | -0.03894164 |
| 101    | 1.98361 | -1381.11889937 | -345.487948887 | -1035.58972042 | -1381.077669307 | -0.04123006 |
| 102    | 1.96677 | -1381.11931430 | -345.486330590 | -1035.58962349 | -1381.075954080 | -0.04336022 |
| 103    | 1.95113 | -1381.11969772 | -345.484890813 | -1035.58950409 | -1381.074394903 | -0.04530282 |
| 104    | 1.93690 | -1381.12004499 | -345.483651152 | -1035.58936230 | -1381.073013452 | -0.04703154 |
| 105    | 1.92429 | -1381.12035394 | -345.482616901 | -1035.58919944 | -1381.071816341 | -0.04853760 |
| 106    | 1.91343 | -1381.12062480 | -345.481794417 | -1035.58901977 | -1381.070814187 | -0.04981061 |
| 107    | 1.90434 | -1381.12085990 | -345.481153197 | -1035.58883377 | -1381.069986967 | -0.05087293 |
| 108    | 1.89695 | -1381.12106329 | -345.480703939 | -1035.58865361 | -1381.069357549 | -0.05170574 |
| 109    | 1.89096 | -1381.12123998 | -345.480301904 | -1035.58849303 | -1381.068794934 | -0.05244505 |
| 110    | 1.88661 | -1381.12139487 | -345.480237332 | -1035.58836122 | -1381.068598552 | -0.05279632 |
| 111    | 1.88290 | -1381.12153245 | -345.479795021 | -1035.58825836 | -1381.068053381 | -0.05347907 |
| 112    | 1.87960 | -1381.12165696 | -345.479784912 | -1035.58820481 | -1381.067989722 | -0.05366724 |
| 113    | 1.87831 | -1381.12177052 | -345.479617211 | -1035.58814918 | -1381.067766391 | -0.05400413 |
| 114    | 1.87469 | -1381.12187589 | -345.479272510 | -1035.58815290 | -1381.067425410 | -0.05445048 |
| 115    | 1.87434 | -1381.12197282 | -345.479284541 | -1035.58812703 | -1381.067411571 | -0.05456125 |
| 116    | 1.87292 | -1381.12206156 | -345.479105692 | -1035.58813790 | -1381.067243592 | -0.05481797 |
| 117    | 1.87161 | -1381.12214224 | -345.478938422 | -1035.58815161 | -1381.067090032 | -0.05505221 |
| 118    | 1.87037 | -1381.12221530 | -345.478751493 | -1035.58817330 | -1381.066924793 | -0.05529051 |
| 119    | 1.86942 | -1381.12228106 | -345.478598158 | -1035.58819189 | -1381.066790048 | -0.05549101 |
| 120    | 1.86819 | -1381.12233988 | -345.478375723 | -1035.58822807 | -1381.066603793 | -0.05573609 |
| 121    | 1.86688 | -1381.12239275 | -345.478169139 | -1035.58826038 | -1381.066429519 | -0.05596323 |
| 122    | 1.86610 | -1381.12243944 | -345.477983738 | -1035.58829659 | -1381.066280328 | -0.05615911 |
| 123    | 1.86613 | -1381.12248132 | -345.477904658 | -1035.58831469 | -1381.066219348 | -0.05626197 |
| 124    | 1.86493 | -1381.12251856 | -345.477652639 | -1035.58836397 | -1381.066016609 | -0.05650195 |
| 125    | 1.86373 | -1381.12255169 | -345.477438909 | -1035.58839453 | -1381.065833439 | -0.05671825 |
| 126    | 1.86344 | -1381.12258153 | -345.477289119 | -1035.58842797 | -1381.065717089 | -0.05686444 |
| 127    | 1.86274 | -1381.12260849 | -345.477113184 | -1035.58845806 | -1381.065571244 | -0.05703725 |
| 128    | 1.86226 | -1381.12263283 | -345.476954460 | -1035.58848687 | -1381.065441330 | -0.05719150 |
| 129    | 1.86265 | -1381.12265509 | -345.476907461 | -1035.58849650 | -1381.065403961 | -0.05725113 |
| 130    | 1.86158 | -1381.12267501 | -345.476697614 | -1035.58852505 | -1381.065222664 | -0.05745235 |
| OPT PC | 1.85965 | -1381.12281148 | -345.476580949 | -1035.58856735 | -1381.065148299 | -0.05766318 |

**Table S66.** Energy strain analysis of the PPh<sub>3</sub> addition to **2**. Level of theory: SMD(DCM)/MN15/def2-TZVPP. RC refers to reactant complex and PC to product complex. Energies are given in Hartree

| Step                 | P-C     | $E_{\text{tot}}$ | SP <sub>2</sub> | SP <sub>PPh<sub>3</sub></sub> | SP <sub>2+PPh<sub>3</sub></sub> | $E_{\text{tot}} - \text{SP}_{2+\text{PPh}_3}$ |
|----------------------|---------|------------------|-----------------|-------------------------------|---------------------------------|-----------------------------------------------|
| OPT RC               | 3.82985 | -1419.17820485   | -383.571065763  | -1035.59514749                | -1419.166213253                 | -0.011991597                                  |
| OPT <b>2</b>         | -       | -383.571065763   | -               | -                             | -                               | -                                             |
| OPT PPh <sub>3</sub> | -       | -1035.59514749   | -               | -                             | -                               | -                                             |
| 1                    | 3.32166 | -1419.17278615   | -383.570745979  | -1035.59351554                | -1419.164261519                 | -0.008524630                                  |
| 2                    | 3.31181 | -1419.17264884   | -383.570737171  | -1035.59349199                | -1419.164229161                 | -0.008524631                                  |
| 3                    | 3.30168 | -1419.17250840   | -383.570727372  | -1035.59346930                | -1419.164196672                 | -0.008419679                                  |
| 4                    | 3.29149 | -1419.17236387   | -383.570717476  | -1035.59344787                | -1419.164165346                 | -0.008311728                                  |
| 5                    | 3.28134 | -1419.17221512   | -383.570706816  | -1035.59342790                | -1419.164134716                 | -0.008198524                                  |
| 6                    | 3.27020 | -1419.17206279   | -383.570693819  | -1035.59340898                | -1419.164102799                 | -0.008080404                                  |
| 7                    | 3.25935 | -1419.17190497   | -383.570681348  | -1035.59339147                | -1419.164072818                 | -0.007959991                                  |
| 8                    | 3.24824 | -1419.17174313   | -383.570668393  | -1035.59337530                | -1419.164043693                 | -0.007832152                                  |
| 9                    | 3.23761 | -1419.17157538   | -383.570657346  | -1035.59336024                | -1419.164017586                 | -0.007699437                                  |
| 10                   | 3.22622 | -1419.17140100   | -383.570644004  | -1035.59334646                | -1419.163990464                 | -0.007557794                                  |
| 11                   | 3.21462 | -1419.17122222   | -383.570630451  | -1035.59333389                | -1419.163964341                 | -0.007410536                                  |
| 12                   | 3.20227 | -1419.17103397   | -383.570614416  | -1035.59332317                | -1419.163937586                 | -0.007257879                                  |
| 13                   | 3.19026 | -1419.17084115   | -383.570597950  | -1035.59331324                | -1419.163911190                 | -0.007096384                                  |
| 14                   | 3.17803 | -1419.17064061   | -383.570581487  | -1035.59330490                | -1419.163886387                 | -0.006929960                                  |
| 15                   | 3.16553 | -1419.17043253   | -383.570563285  | -1035.59329739                | -1419.163860675                 | -0.006754223                                  |
| 16                   | 3.15295 | -1419.17021418   | -383.570544667  | -1035.59329088                | -1419.163835547                 | -0.006571855                                  |
| 17                   | 3.14003 | -1419.16999091   | -383.570523464  | -1035.59328520                | -1419.163808664                 | -0.006378633                                  |
| 18                   | 3.1273  | -1419.16975656   | -383.570503267  | -1035.59327984                | -1419.163783107                 | -0.006182246                                  |
| 19                   | 3.11409 | -1419.16951622   | -383.570477351  | -1035.59327445                | -1419.163751801                 | -0.005973453                                  |
| 20                   | 3.10088 | -1419.16926753   | -383.570452342  | -1035.59326895                | -1419.163721292                 | -0.005764419                                  |
| 21                   | 3.08734 | -1419.16900576   | -383.570422567  | -1035.59326353                | -1419.163686097                 | -0.005546238                                  |
| 22                   | 3.07368 | -1419.16873718   | -383.570390692  | -1035.59325755                | -1419.163648242                 | -0.005319663                                  |
| 23                   | 3.05963 | -1419.16845649   | -383.570351459  | -1035.59325143                | -1419.163602889                 | -0.005088938                                  |
| 24                   | 3.04583 | -1419.16816949   | -383.570313959  | -1035.59324392                | -1419.163557879                 | -0.004853601                                  |
| 25                   | 3.03168 | -1419.16787051   | -383.570270527  | -1035.59323608                | -1419.163506607                 | -0.004611611                                  |
| 26                   | 3.01739 | -1419.16756071   | -383.570223068  | -1035.59322699                | -1419.163450058                 | -0.004363903                                  |
| 27                   | 3.00278 | -1419.16724074   | -383.570168118  | -1035.59321742                | -1419.163385538                 | -0.004110652                                  |
| 28                   | 2.98794 | -1419.16690705   | -383.570105396  | -1035.59320686                | -1419.163312256                 | -0.003855202                                  |
| 29                   | 2.97272 | -1419.16656749   | -383.570031653  | -1035.59319590                | -1419.163227553                 | -0.003594794                                  |
| 30                   | 2.95767 | -1419.16621375   | -383.569942368  | -1035.59318160                | -1419.163123968                 | -0.003339937                                  |
| 31                   | 2.94231 | -1419.16585224   | -383.569849706  | -1035.59316809                | -1419.163017796                 | -0.003089782                                  |
| 32                   | 2.92655 | -1419.16547700   | -383.569743594  | -1035.59315359                | -1419.162897184                 | -0.002834444                                  |
| 33                   | 2.91058 | -1419.16508912   | -383.569623615  | -1035.59313843                | -1419.162762045                 | -0.002579816                                  |
| 34                   | 2.89435 | -1419.16468911   | -383.569487239  | -1035.59312222                | -1419.162609459                 | -0.002327075                                  |
| 35                   | 2.87789 | -1419.16427709   | -383.569332793  | -1035.59310517                | -1419.162437963                 | -0.002079651                                  |
| 36                   | 2.86118 | -1419.16385330   | -383.569158658  | -1035.59308695                | -1419.162245608                 | -0.001839127                                  |
| 37                   | 2.84423 | -1419.16341801   | -383.568961892  | -1035.59306765                | -1419.162029542                 | -0.001607692                                  |
| 38                   | 2.82703 | -1419.16297160   | -383.568740281  | -1035.59304714                | -1419.161787421                 | -0.001388468                                  |
| 39                   | 2.80958 | -1419.16251458   | -383.568490554  | -1035.59302587                | -1419.161516424                 | -0.001184179                                  |
| 40                   | 2.79188 | -1419.16204759   | -383.568210283  | -1035.59300332                | -1419.161213603                 | -0.000998156                                  |
| 41                   | 2.77393 | -1419.16157140   | -383.567895995  | -1035.59298009                | -1419.160876085                 | -0.000833987                                  |
| 42                   | 2.75573 | -1419.16108695   | -383.567544257  | -1035.59295594                | -1419.160500197                 | -0.000695315                                  |

|    |         |                |                |                |                 |              |
|----|---------|----------------|----------------|----------------|-----------------|--------------|
| 43 | 2.73728 | -1419.16059537 | -383.567151379 | -1035.59293180 | -1419.160083179 | -0.000586753 |
| 44 | 2.71858 | -1419.16009834 | -383.566712678 | -1035.59290729 | -1419.159619968 | -0.000512191 |
| 45 | 2.69964 | -1419.15959786 | -383.566225337 | -1035.59288234 | -1419.159107677 | -0.000478372 |
| 46 | 2.68046 | -1419.15909602 | -383.565684667 | -1035.59285755 | -1419.158542217 | -0.000490183 |
| 47 | 2.66105 | -1419.15859511 | -383.565086939 | -1035.59283279 | -1419.157919729 | -0.000553803 |
| 48 | 2.64143 | -1419.15809792 | -383.564428941 | -1035.59280898 | -1419.157237921 | -0.000675381 |
| 49 | 2.62159 | -1419.15760768 | -383.563705274 | -1035.59278563 | -1419.156490904 | -0.000859999 |
| 50 | 2.60156 | -1419.15712809 | -383.562912727 | -1035.59276338 | -1419.155676107 | -0.001116776 |
| 51 | 2.58135 | -1419.15666319 | -383.562048273 | -1035.59274171 | -1419.154789983 | -0.001451983 |
| 52 | 2.56096 | -1419.15621741 | -383.561107998 | -1035.59272169 | -1419.153829688 | -0.001873207 |
| 53 | 2.54042 | -1419.15579552 | -383.560088150 | -1035.59270236 | -1419.152790510 | -0.002387722 |
| 54 | 2.51972 | -1419.15540262 | -383.558985219 | -1035.59268408 | -1419.151669299 | -0.003005010 |
| 55 | 2.49889 | -1419.15504405 | -383.557797103 | -1035.59266721 | -1419.150464313 | -0.003733321 |
| 56 | 2.47793 | -1419.15472539 | -383.556519327 | -1035.59265132 | -1419.149170647 | -0.004579737 |
| 57 | 2.45686 | -1419.15445238 | -383.555150391 | -1035.59263677 | -1419.147787161 | -0.005554743 |
| 58 | 2.43569 | -1419.15423081 | -383.553689166 | -1035.59262261 | -1419.146311776 | -0.006665219 |
| 59 | 2.41443 | -1419.15406637 | -383.552134595 | -1035.59260949 | -1419.144744085 | -0.007919034 |
| 60 | 2.39312 | -1419.15396437 | -383.550489767 | -1035.59259793 | -1419.143087697 | -0.009322285 |
| 61 | 2.37175 | -1419.15392947 | -383.548752632 | -1035.59258584 | -1419.141338472 | -0.010876673 |
| 62 | 2.37175 | -1419.15392947 | -383.548752632 | -1035.59258584 | -1419.141338472 | -0.012590998 |
| 63 | 2.35034 | -1419.15396557 | -383.546926460 | -1035.59257422 | -1419.139500680 | -0.014464890 |
| 64 | 2.32893 | -1419.15407561 | -383.545015619 | -1035.59256280 | -1419.137578419 | -0.016497191 |
| 65 | 2.30752 | -1419.15426156 | -383.543031134 | -1035.59255110 | -1419.135582234 | -0.018679326 |
| 66 | 2.28612 | -1419.15452430 | -383.540972163 | -1035.59253911 | -1419.133511273 | -0.021013027 |
| 67 | 2.26476 | -1419.15486351 | -383.538848043 | -1035.59252662 | -1419.131374663 | -0.023488847 |
| 68 | 2.22224 | -1419.15576409 | -383.534445022 | -1035.59249948 | -1419.126944502 | -0.028819588 |
| 69 | 2.20111 | -1419.15631899 | -383.532182732 | -1035.59248335 | -1419.124666082 | -0.031652908 |
| 70 | 2.18012 | -1419.15693764 | -383.529897810 | -1035.59246574 | -1419.122363550 | -0.034574090 |
| 71 | 2.15928 | -1419.15761449 | -383.527598655 | -1035.59244537 | -1419.120044025 | -0.037570465 |
| 72 | 2.13861 | -1419.15834318 | -383.525297177 | -1035.59242266 | -1419.117719837 | -0.040623343 |
| 73 | 2.11816 | -1419.15911650 | -383.523008496 | -1035.59239652 | -1419.115405016 | -0.043711484 |
| 74 | 2.09795 | -1419.15992634 | -383.520747399 | -1035.59236714 | -1419.113114539 | -0.046811801 |
| 75 | 2.07804 | -1419.16076374 | -383.518529093 | -1035.59233284 | -1419.110861933 | -0.049901807 |
| 76 | 2.05848 | -1419.16161917 | -383.516369419 | -1035.59229376 | -1419.108663179 | -0.052955991 |
| 77 | 2.03932 | -1419.16248286 | -383.514288743 | -1035.59224810 | -1419.106536843 | -0.055946017 |
| 78 | 2.02064 | -1419.16334511 | -383.512301639 | -1035.59219464 | -1419.104496279 | -0.058848831 |
| 79 | 2.0025  | -1419.16419659 | -383.510426550 | -1035.59213264 | -1419.102559190 | -0.061637400 |
| 80 | 1.98501 | -1419.16502849 | -383.508684756 | -1035.59206036 | -1419.100745116 | -0.064283374 |
| 81 | 1.96824 | -1419.16583282 | -383.507087538 | -1035.59197634 | -1419.099063878 | -0.066768942 |
| 82 | 1.9523  | -1419.16660261 | -383.505654465 | -1035.59187803 | -1419.097532495 | -0.069070115 |
| 83 | 1.9373  | -1419.16733222 | -383.504396245 | -1035.59176425 | -1419.096160495 | -0.071171725 |
| 84 | 1.92333 | -1419.16801754 | -383.503316234 | -1035.59163254 | -1419.094948774 | -0.073068766 |
| 85 | 1.91046 | -1419.16865606 | -383.502418265 | -1035.59148145 | -1419.093899715 | -0.074756345 |
| 86 | 1.89876 | -1419.16924682 | -383.501696369 | -1035.59131074 | -1419.093007109 | -0.076239711 |
| 87 | 1.88822 | -1419.16979013 | -383.501136130 | -1035.59112185 | -1419.092257980 | -0.077532150 |
| 88 | 1.87883 | -1419.17028728 | -383.500716299 | -1035.59091452 | -1419.091630819 | -0.078656461 |
| 89 | 1.87052 | -1419.17074026 | -383.500411492 | -1035.59069387 | -1419.091105362 | -0.079634898 |
| 90 | 1.8632  | -1419.17115166 | -383.500205043 | -1035.59046343 | -1419.090668473 | -0.080483187 |



|        |         |                |                |                |                 |              |
|--------|---------|----------------|----------------|----------------|-----------------|--------------|
| 91     | 1.85679 | -1419.17152466 | -383.500063984 | -1035.59022978 | -1419.090293764 | -0.081230896 |
| 92     | 1.8512  | -1419.17186307 | -383.499977695 | -1035.58999851 | -1419.089976205 | -0.081886865 |
| 93     | 1.84636 | -1419.17217105 | -383.499923578 | -1035.58977821 | -1419.089701788 | -0.082469262 |
| 94     | 1.83866 | -1419.17271193 | -383.499851228 | -1035.58939161 | -1419.089242838 | -0.083469092 |
| 95     | 1.83576 | -1419.17295129 | -383.499837762 | -1035.58923234 | -1419.089070102 | -0.083881188 |
| OPT PC | 1.80635 | -1419.17769006 | -383.494003081 | -1035.58783087 | -1419.081833951 | -0.095856109 |

**Table S67.** Energy strain analysis of the PPh<sub>3</sub> addition to **3**. Level of theory: SMD(DCM)/MN15/def2-TZVPP. RC refers to reactant complex and PC to product complex. Energies are given in Hartree

| Step                 | P-C     | $E_{\text{tot}}$ | $S_3$          | SP <sub>PPh<sub>3</sub></sub> | SP <sub>13+PPh<sub>3</sub></sub> | $E_{\text{tot}} - SP_{3+PPh_3}$ |
|----------------------|---------|------------------|----------------|-------------------------------|----------------------------------|---------------------------------|
| OPT RC               | 3.72395 | -1379.88190702   | -344.277896574 | -1035.59498328                | -1379.872879854                  | -0.009027166                    |
| OPT <b>3</b>         | -       | -344.277940134   | -              | -                             | -                                | -                               |
| OPT PPh <sub>3</sub> | -       | -1035.59514216   | -              | -                             | -                                | -                               |
| 1                    | 3.60908 | -1379.87866994   | -344.277844851 | -1035.59415865                | -1379.872003501                  | -0.006666499                    |
| 2                    | 3.59728 | -1379.87858417   | -344.277840207 | -1035.59412369                | -1379.871963897                  | -0.006620103                    |
| 3                    | 3.58502 | -1379.87849524   | -344.277834842 | -1035.59408980                | -1379.871924642                  | -0.006570358                    |
| 4                    | 3.57235 | -1379.87840248   | -344.277830628 | -1035.59405576                | -1379.871886388                  | -0.006515612                    |
| 5                    | 3.55951 | -1379.87820774   | -344.277823632 | -1035.59402307                | -1379.871846702                  | -0.006460298                    |
| 6                    | 3.54608 | -1379.87810514   | -344.277817407 | -1035.59399058                | -1379.871807987                  | -0.006400013                    |
| 7                    | 3.53254 | -1379.87810500   | -344.277810378 | -1035.59395838                | -1379.871768758                  | -0.006336242                    |
| 8                    | 3.51912 | -1379.87800057   | -344.277805363 | -1035.59392621                | -1379.871731573                  | -0.006268997                    |
| 9                    | 3.50535 | -1379.87789205   | -344.277798165 | -1035.59389562                | -1379.871693785                  | -0.006198265                    |
| 10                   | 3.49080 | -1379.87778064   | -344.277788481 | -1035.59386495                | -1379.871653431                  | -0.006127209                    |
| 11                   | 3.47668 | -1379.87766689   | -344.277781962 | -1035.59383343                | -1379.871615392                  | -0.006051498                    |
| 12                   | 3.46213 | -1379.87755108   | -344.277771299 | -1035.59380271                | -1379.871574009                  | -0.005977071                    |
| 13                   | 3.44838 | -1379.87743242   | -344.277767579 | -1035.59377051                | -1379.871538089                  | -0.005894331                    |
| 14                   | 3.43374 | -1379.87730888   | -344.277753786 | -1035.59374061                | -1379.871494396                  | -0.005814484                    |
| 15                   | 3.41894 | -1379.87718190   | -344.277746522 | -1035.59370960                | -1379.871456122                  | -0.005725778                    |
| 16                   | 3.40390 | -1379.87704915   | -344.277734962 | -1035.59368057                | -1379.871415532                  | -0.005633618                    |
| 17                   | 3.38827 | -1379.87690969   | -344.277724966 | -1035.59365156                | -1379.871376526                  | -0.005533164                    |
| 18                   | 3.37240 | -1379.87676469   | -344.277714547 | -1035.59362362                | -1379.871338167                  | -0.005426523                    |
| 19                   | 3.35662 | -1379.87661377   | -344.277707304 | -1035.59359542                | -1379.871302724                  | -0.005311046                    |
| 20                   | 3.34025 | -1379.87645564   | -344.277693287 | -1035.59356911                | -1379.871262397                  | -0.005193243                    |
| 21                   | 3.32342 | -1379.87629189   | -344.277677609 | -1035.59354318                | -1379.871220789                  | -0.005071101                    |
| 22                   | 3.30603 | -1379.87612118   | -344.277657259 | -1035.59351863                | -1379.871175889                  | -0.004945291                    |
| 23                   | 3.28887 | -1379.87594414   | -344.277640789 | -1035.59349435                | -1379.871135139                  | -0.004809001                    |
| 24                   | 3.27073 | -1379.87576012   | -344.277605520 | -1035.59347166                | -1379.871077180                  | -0.004682940                    |
| 25                   | 3.25368 | -1379.87556881   | -344.277596103 | -1035.59344755                | -1379.871043653                  | -0.004525157                    |
| 26                   | 3.23531 | -1379.87536941   | -344.277553030 | -1035.59342727                | -1379.870980300                  | -0.004389110                    |
| 27                   | 3.21798 | -1379.87516006   | -344.277542635 | -1035.59340430                | -1379.870946935                  | -0.004213125                    |
| 28                   | 3.19942 | -1379.87494004   | -344.277502436 | -1035.59338557                | -1379.870888006                  | -0.004052034                    |
| 29                   | 3.18080 | -1379.87470978   | -344.277474379 | -1035.59336611                | -1379.870840489                  | -0.003869291                    |
| 30                   | 3.16210 | -1379.87446955   | -344.277442944 | -1035.59334727                | -1379.870790214                  | -0.003679336                    |
| 31                   | 3.14365 | -1379.87421889   | -344.277415910 | -1035.59332732                | -1379.870743230                  | -0.003475660                    |
| 32                   | 3.12451 | -1379.87395854   | -344.277376062 | -1035.59331050                | -1379.870686562                  | -0.003271978                    |
| 33                   | 3.10535 | -1379.87368676   | -344.277337216 | -1035.59329625                | -1379.870633466                  | -0.003053294                    |
| 34                   | 3.08652 | -1379.87340501   | -344.277296540 | -1035.59328865                | -1379.870585190                  | -0.002819820                    |

|    |         |                |                |                |                 |              |
|----|---------|----------------|----------------|----------------|-----------------|--------------|
| 35 | 3.06629 | -1379.87311228 | -344.277224578 | -1035.59328455 | -1379.870509128 | -0.002603152 |
| 36 | 3.04692 | -1379.87280754 | -344.277183051 | -1035.59327238 | -1379.870455431 | -0.002352109 |
| 37 | 3.02712 | -1379.87248910 | -344.277113620 | -1035.59324927 | -1379.870362890 | -0.002126210 |
| 38 | 3.00700 | -1379.87215651 | -344.277047308 | -1035.59321975 | -1379.870267058 | -0.001889452 |
| 39 | 2.98736 | -1379.87181005 | -344.276991914 | -1035.59318715 | -1379.870179064 | -0.001630986 |
| 40 | 2.96710 | -1379.87144989 | -344.276907799 | -1035.59315683 | -1379.870064629 | -0.001385261 |
| 41 | 2.94747 | -1379.87107288 | -344.276852282 | -1035.59313889 | -1379.869991172 | -0.001081708 |
| 42 | 2.92710 | -1379.87068197 | -344.276741749 | -1035.59311625 | -1379.869857999 | -0.000823971 |
| 43 | 2.90663 | -1379.87027196 | -344.276656462 | -1035.59310444 | -1379.869760902 | -0.000511058 |
| 44 | 2.88591 | -1379.86984726 | -344.276529815 | -1035.59308118 | -1379.869610995 | -0.000236265 |
| 45 | 2.86501 | -1379.86940437 | -344.276405404 | -1035.59304024 | -1379.869445644 | 0.000041274  |
| 46 | 2.84392 | -1379.86894427 | -344.276253873 | -1035.59300101 | -1379.869254883 | 0.000310613  |
| 47 | 2.82263 | -1379.86846679 | -344.276087049 | -1035.59298847 | -1379.869075519 | 0.000608729  |
| 48 | 2.80112 | -1379.86797211 | -344.275893639 | -1035.59297776 | -1379.868871399 | 0.000899289  |
| 49 | 2.77941 | -1379.86746065 | -344.275674028 | -1035.59295362 | -1379.868627648 | 0.001166998  |
| 50 | 2.75747 | -1379.86693325 | -344.275421389 | -1035.59292579 | -1379.868347179 | 0.001413929  |
| 51 | 2.73531 | -1379.86639108 | -344.275133189 | -1035.59290558 | -1379.868038769 | 0.001647689  |
| 52 | 2.71292 | -1379.86583560 | -344.274801590 | -1035.59287951 | -1379.867681100 | 0.001845500  |
| 53 | 2.64436 | -1379.86469249 | -344.273985493 | -1035.59282848 | -1379.866813973 | 0.002121483  |
| 54 | 2.62105 | -1379.86411017 | -344.273487188 | -1035.59280367 | -1379.866290858 | 0.002180688  |
| 55 | 2.59751 | -1379.86352536 | -344.272919768 | -1035.59277983 | -1379.865699598 | 0.002174238  |
| 56 | 2.57376 | -1379.86294236 | -344.272274459 | -1035.59275374 | -1379.865028199 | 0.002085839  |
| 57 | 2.54981 | -1379.86236633 | -344.271544424 | -1035.59273017 | -1379.864274594 | 0.001908264  |
| 58 | 2.52567 | -1379.86180333 | -344.270720707 | -1035.59271332 | -1379.863434027 | 0.001630697  |
| 59 | 2.50134 | -1379.86126015 | -344.269794568 | -1035.59270339 | -1379.862497958 | 0.001237808  |
| 60 | 2.47684 | -1379.86074450 | -344.268757660 | -1035.59269840 | -1379.861456060 | 0.000711560  |
| 61 | 2.45220 | -1379.86026512 | -344.267601335 | -1035.59269536 | -1379.860296695 | 0.000031575  |
| 62 | 2.42743 | -1379.85983190 | -344.266324278 | -1035.59269257 | -1379.859016848 | -0.000815052 |
| 63 | 2.40256 | -1379.85945543 | -344.264918186 | -1035.59268957 | -1379.857607756 | -0.001847674 |
| 64 | 2.37762 | -1379.85914652 | -344.263385964 | -1035.59268577 | -1379.856071734 | -0.003074786 |
| 65 | 2.35263 | -1379.85891540 | -344.261733345 | -1035.59268085 | -1379.854414195 | -0.004501205 |
| 66 | 2.32760 | -1379.85872155 | -344.258082599 | -1035.59266605 | -1379.850748649 | -0.007972901 |
| 67 | 2.30255 | -1379.85877303 | -344.256091662 | -1035.59265516 | -1379.848746822 | -0.010026208 |
| 68 | 2.27750 | -1379.85893041 | -344.254005569 | -1035.59264141 | -1379.846646979 | -0.012283431 |
| 69 | 2.25248 | -1379.85919688 | -344.251828213 | -1035.59262407 | -1379.844452283 | -0.014744597 |
| 70 | 2.22750 | -1379.85957319 | -344.249574977 | -1035.59260186 | -1379.842176837 | -0.017396353 |
| 71 | 2.20259 | -1379.86005761 | -344.247258020 | -1035.59257381 | -1379.839831830 | -0.020225780 |
| 72 | 2.17779 | -1379.86064596 | -344.244892515 | -1035.59253927 | -1379.837431785 | -0.023214175 |
| 73 | 2.15311 | -1379.86133179 | -344.242494027 | -1035.59249718 | -1379.834991207 | -0.026340583 |
| 74 | 2.12860 | -1379.86210670 | -344.240076225 | -1035.59244736 | -1379.832523585 | -0.029583115 |
| 75 | 2.10429 | -1379.86296056 | -344.237662078 | -1035.59238949 | -1379.830051568 | -0.032908992 |
| 76 | 2.08023 | -1379.86388143 | -344.235268949 | -1035.59232228 | -1379.827591229 | -0.036290201 |
| 77 | 2.05648 | -1379.86485571 | -344.232914741 | -1035.59224608 | -1379.825160821 | -0.039694889 |
| 78 | 2.03310 | -1379.86586841 | -344.230619274 | -1035.59215900 | -1379.822778274 | -0.043090136 |
| 79 | 2.01019 | -1379.86690357 | -344.228405246 | -1035.59206067 | -1379.820465916 | -0.046437654 |
| 80 | 1.98784 | -1379.86794455 | -344.226300429 | -1035.59194910 | -1379.818249529 | -0.049695021 |
| 81 | 1.96619 | -1379.86897463 | -344.224331634 | -1035.59182393 | -1379.816155564 | -0.052819066 |
| 82 | 1.94541 | -1379.86997764 | -344.222523801 | -1035.59168304 | -1379.814206841 | -0.055770799 |

|        |         |                 |                |                |                 |              |
|--------|---------|-----------------|----------------|----------------|-----------------|--------------|
| 83     | 1.92570 | -1379.87093935  | -344.220897668 | -1035.59152539 | -1379.812423058 | -0.058516292 |
| 84     | 1.90729 | -1379.87184804  | -344.219499194 | -1035.59135024 | -1379.810849434 | -0.060998606 |
| 85     | 1.89039 | -1379.87269536  | -344.218291057 | -1035.59115663 | -1379.809447687 | -0.063247673 |
| 86     | 1.87481 | -1379.87347924  | -344.217081134 | -1035.59094640 | -1379.808027534 | -0.065451706 |
| 87     | 1.86199 | -1379.87419875  | -344.216676707 | -1035.59072299 | -1379.807399697 | -0.066799053 |
| 88     | 1.85077 | -1379.87485961  | -344.216141047 | -1035.59048642 | -1379.806627467 | -0.068232143 |
| 89     | 1.84126 | -1379.87546207  | -344.215803129 | -1035.59024805 | -1379.806051179 | -0.069410891 |
| 90     | 1.83409 | -1379.87601994  | -344.215768812 | -1035.59001009 | -1379.805778902 | -0.070241038 |
| 91     | 1.82723 | -1379.87653003  | -344.215436311 | -1035.58978616 | -1379.805222471 | -0.071307559 |
| 92     | 1.82160 | -1379.87700601  | -344.215182459 | -1035.58957964 | -1379.804762099 | -0.072243911 |
| 93     | 1.81609 | -1379.87744738  | -344.214874859 | -1035.58939388 | -1379.804268739 | -0.073178641 |
| 94     | 1.81233 | -1379.87785764  | -344.214784753 | -1035.58922138 | -1379.804006133 | -0.073851507 |
| 95     | 1.80912 | -1379.87824449  | -344.214759958 | -1035.58907278 | -1379.803832738 | -0.074411752 |
| 96     | 1.80723 | -1379.87860986  | -344.214772608 | -1035.58893917 | -1379.803711778 | -0.074898082 |
| 97     | 1.80451 | -1379.87895461  | -344.214570928 | -1035.58884132 | -1379.803412248 | -0.075542362 |
| 98     | 1.80210 | -1379.87928401  | -344.214242395 | -1035.58876209 | -1379.803004485 | -0.076279525 |
| 99     | 1.79891 | -1379.87959903  | -344.213833411 | -1035.58870672 | -1379.802540131 | -0.077058899 |
| 100    | 1.79847 | -1379.87989993  | -344.213902223 | -1035.58863491 | -1379.802537133 | -0.077362797 |
| 101    | 1.79706 | -1379.88018844  | -344.213650507 | -1035.58859709 | -1379.802247597 | -0.077940843 |
| 102    | 1.79569 | -1379.88046455  | -344.213428750 | -1035.58857086 | -1379.801999610 | -0.078464940 |
| 103    | 1.79438 | -1379.88072930  | -344.213122576 | -1035.58855430 | -1379.801676876 | -0.079052424 |
| 104    | 1.79345 | -1379.88098229  | -344.213002297 | -1035.58853954 | -1379.801541837 | -0.079440453 |
| 105    | 1.79338 | -1379.881222606 | -344.212903429 | -1035.58852588 | -1379.801429309 | -0.079796751 |
| 106    | 1.79114 | -1379.88145951  | -344.212357914 | -1035.58854063 | -1379.800898544 | -0.080560966 |
| 107    | 1.79038 | -1379.88168365  | -344.212182476 | -1035.58853672 | -1379.800719196 | -0.080964454 |
| 108    | 1.78963 | -1379.88189784  | -344.211926649 | -1035.58853886 | -1379.800465509 | -0.081432331 |
| 109    | 1.78924 | -1379.88210279  | -344.211845969 | -1035.58853855 | -1379.800384519 | -0.081718271 |
| 110    | 1.78935 | -1379.88229938  | -344.211753758 | -1035.58854049 | -1379.800294248 | -0.082005132 |
| 111    | 1.78743 | -1379.88248766  | -344.211217340 | -1035.58856283 | -1379.799780170 | -0.082707490 |
| 112    | 1.78705 | -1379.88266797  | -344.211100685 | -1035.58856434 | -1379.799665025 | -0.083002945 |
| 113    | 1.78632 | -1379.88283915  | -344.210791306 | -1035.58857362 | -1379.799364926 | -0.083474224 |
| 114    | 1.78527 | -1379.88300294  | -344.210468159 | -1035.58858087 | -1379.799049029 | -0.083953911 |
| 115    | 1.78605 | -1379.88315915  | -344.210617451 | -1035.58857740 | -1379.799194851 | -0.083964299 |
| 116    | 1.78527 | -1379.88330775  | -344.210272625 | -1035.58859213 | -1379.798864755 | -0.084442995 |
| 117    | 1.78427 | -1379.88344803  | -344.209903264 | -1035.58860087 | -1379.798504134 | -0.084943896 |
| 118    | 1.78403 | -1379.88358112  | -344.209729985 | -1035.58860656 | -1379.798336545 | -0.085244575 |
| 119    | 1.78434 | -1379.88370675  | -344.209777900 | -1035.58860981 | -1379.798387710 | -0.085319040 |
| 120    | 1.78360 | -1379.88382433  | -344.209391731 | -1035.58862388 | -1379.798015611 | -0.085808719 |
| 121    | 1.78376 | -1379.88393482  | -344.209403868 | -1035.58862117 | -1379.798025038 | -0.085909782 |
| 122    | 1.78326 | -1379.88403794  | -344.209040577 | -1035.58863788 | -1379.797678457 | -0.086359483 |
| 123    | 1.78243 | -1379.88413445  | -344.208676183 | -1035.58864057 | -1379.797316753 | -0.086817697 |
| 124    | 1.78268 | -1379.88422504  | -344.208585739 | -1035.58864572 | -1379.797231459 | -0.086993581 |
| 125    | 1.78237 | -1379.88431024  | -344.208394727 | -1035.58865235 | -1379.797047077 | -0.087263163 |
| 126    | 1.78304 | -1379.88439035  | -344.208537963 | -1035.58865137 | -1379.797189333 | -0.087201017 |
| OPT PC | 1.78009 | -1379.88584857  | -344.204581444 | -1035.58845444 | -1379.793035884 | -0.092812686 |

### 6.3.15 Intrinsic barriers

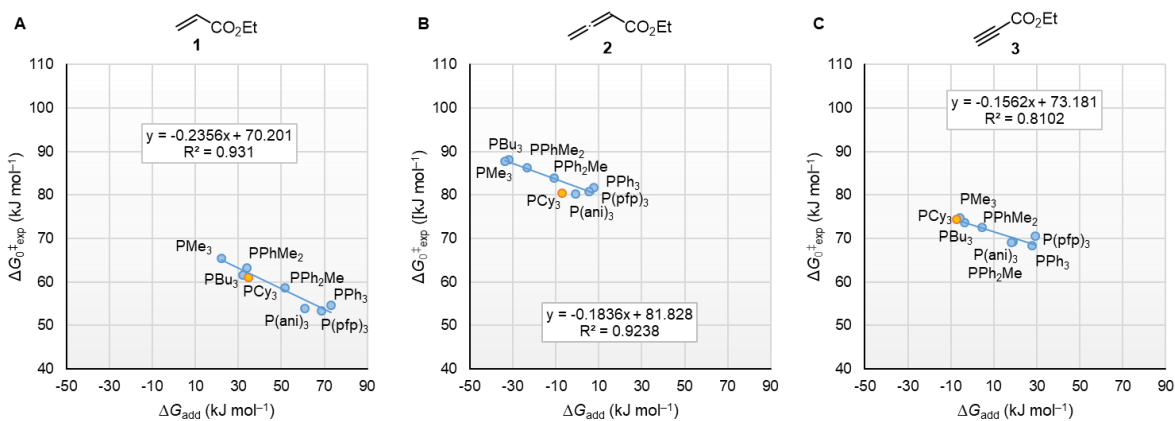

**Fig. S30.** Correlations of  $\Delta G_0^\ddagger_{\text{exp}}$  with  $\Delta G_{\text{add}}$  for phosphine additions to (A) **1**, (B) **2**, and (C) **3** (with  $\Delta G_{\text{add}}$  from Table 4 and  $\Delta G_0^\ddagger_{\text{exp}}$  from Table 5).

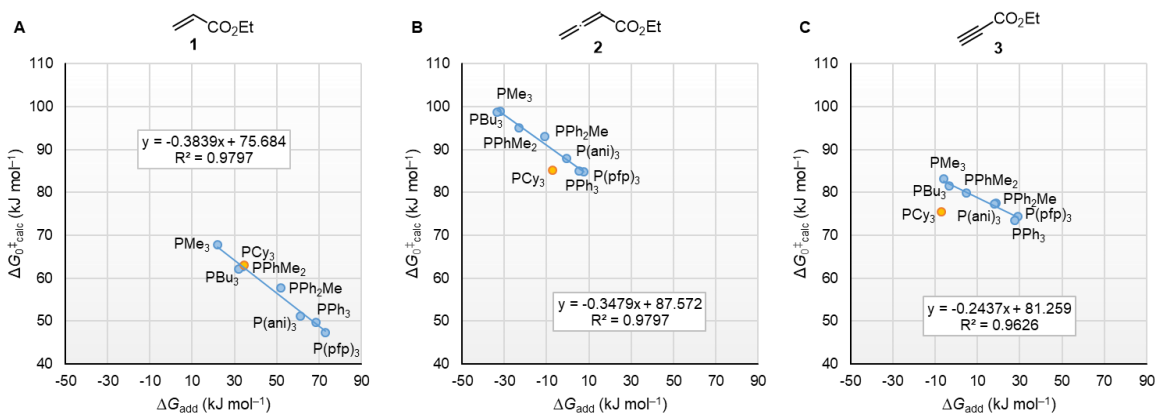

**Fig. S31.** Correlations of  $\Delta G_0^\ddagger_{\text{calc}}$  with  $\Delta G_{\text{add}}$  for phosphine additions to (A) **1**, (B) **2**, and (C) **3** (with  $\Delta G_{\text{add}}$  from Table 4 and  $\Delta G_0^\ddagger_{\text{calc}}$  from Table 5).

## 6.4 Cartesian

## Coordinates

| Michael-acceptors |  |  |  |    |              |              |              |
|-------------------|--|--|--|----|--------------|--------------|--------------|
|                   |  |  |  | 1  | 3.434291000  | -1.089486000 | 0.886222000  |
|                   |  |  |  | 1  | 4.312365000  | 0.163461000  | 0.000430000  |
|                   |  |  |  |    |              | 2_3          |              |
|                   |  |  |  | 6  | 3.076147000  | -1.059472000 | 0.065909000  |
|                   |  |  |  | 6  | 2.237727000  | -0.071444000 | 0.119424000  |
|                   |  |  |  | 6  | 1.399820000  | 0.934120000  | 0.177310000  |
|                   |  |  |  | 6  | -0.048926000 | 0.798931000  | -0.076820000 |
|                   |  |  |  | 8  | -0.816523000 | 1.735998000  | -0.018621000 |
|                   |  |  |  | 8  | -0.419281000 | -0.444323000 | -0.380421000 |
|                   |  |  |  | 6  | -1.819708000 | -0.664953000 | -0.618830000 |
|                   |  |  |  | 6  | -2.570944000 | -0.820335000 | 0.682100000  |
|                   |  |  |  | 1  | 3.578242000  | -1.314938000 | -0.860231000 |
|                   |  |  |  | 1  | 3.292231000  | -1.655560000 | 0.945125000  |
|                   |  |  |  | 1  | 1.738545000  | 1.933669000  | 0.420934000  |
|                   |  |  |  | 1  | -1.860503000 | -1.575501000 | -1.212500000 |
|                   |  |  |  | 1  | -2.210440000 | 0.162716000  | -1.209638000 |
|                   |  |  |  | 1  | -2.159630000 | -0.162716000 | -1.260490000 |
|                   |  |  |  | 1  | -2.516784000 | 0.094170000  | 1.271835000  |
|                   |  |  |  | 1  | -3.619926000 | -1.035047000 | 0.476208000  |
|                   |  |  |  |    |              | 3_1          |              |
|                   |  |  |  | 6  | 2.953204000  | -0.918783000 | 0.000080000  |
|                   |  |  |  | 6  | 1.907471000  | -0.329698000 | -0.000169000 |
|                   |  |  |  | 6  | 0.669868000  | 0.430206000  | 0.000008000  |
|                   |  |  |  | 8  | 0.630990000  | 1.638161000  | 0.000005000  |
|                   |  |  |  | 8  | -0.393487000 | -0.359674000 | 0.000032000  |
|                   |  |  |  | 6  | -1.673336000 | 0.306695000  | 0.000034000  |
|                   |  |  |  | 6  | -2.738409000 | -0.750708000 | -0.000023000 |
|                   |  |  |  | 1  | 3.882301000  | -1.444585000 | 0.000123000  |
|                   |  |  |  | 1  | -1.728625000 | 0.943076000  | -0.883354000 |
|                   |  |  |  | 1  | -1.728653000 | 0.943009000  | 0.883468000  |
|                   |  |  |  | 1  | -3.720662000 | -0.285393000 | -0.000061000 |
|                   |  |  |  | 1  | -2.658549000 | -1.386017000 | -0.886332000 |
|                   |  |  |  | 1  | -2.658630000 | -1.386031000 | 0.886282000  |
|                   |  |  |  |    |              | 3_2          |              |
|                   |  |  |  | 6  | -3.026975000 | -0.468345000 | 0.278450000  |
|                   |  |  |  | 6  | -1.889636000 | -0.134924000 | 0.089034000  |
|                   |  |  |  | 6  | -0.528346000 | 0.321521000  | -0.131778000 |
|                   |  |  |  | 8  | -0.211226000 | 1.487632000  | -0.117501000 |
|                   |  |  |  | 8  | 0.296405000  | -0.691851000 | -0.354329000 |
|                   |  |  |  | 8  | 1.684870000  | -0.359699000 | -0.571295000 |
|                   |  |  |  | 6  | 2.392855000  | -0.135831000 | 0.742835000  |
|                   |  |  |  | 1  | -4.038673000 | -0.766279000 | 0.444899000  |
|                   |  |  |  | 1  | 1.735505000  | 0.518879000  | -1.212822000 |
|                   |  |  |  | 1  | 2.089655000  | -1.216166000 | -1.104486000 |
|                   |  |  |  | 1  | 3.448147000  | 0.063976000  | 0.556097000  |
|                   |  |  |  | 1  | 1.970630000  | 0.717453000  | 1.272479000  |
|                   |  |  |  | 1  | 2.316700000  | -1.020439000 | 1.374996000  |
|                   |  |  |  |    |              | 3_3          |              |
|                   |  |  |  | 6  | 2.056657000  | 1.633837000  | 0.000000000  |
|                   |  |  |  | 6  | 1.457045000  | 0.593495000  | -0.000008000 |
|                   |  |  |  | 6  | 0.783743000  | -0.696192000 | 0.000003000  |
|                   |  |  |  | 8  | 1.397134000  | -1.736091000 | -0.000018000 |
|                   |  |  |  | 8  | -0.542160000 | -0.682260000 | 0.000038000  |
|                   |  |  |  | 6  | -1.261793000 | 0.568821000  | 0.000012000  |
|                   |  |  |  | 6  | -2.730729000 | 0.238313000  | -0.000021000 |
|                   |  |  |  | 1  | 2.593019000  | 2.557084000  | -0.000100000 |
|                   |  |  |  | 1  | -0.979737000 | 1.136517000  | -0.887200000 |
|                   |  |  |  | 1  | -0.979777000 | 1.136526000  | 0.887231000  |
|                   |  |  |  | 1  | -3.309933000 | 1.161220000  | -0.000052000 |
|                   |  |  |  | 1  | -2.996430000 | -0.337106000 | -0.886323000 |
|                   |  |  |  | 1  | -2.996480000 | -0.337080000 | 0.886281000  |
|                   |  |  |  |    |              | Phosphines   |              |
|                   |  |  |  |    |              | PMe3_1       |              |
|                   |  |  |  | 6  | 2.953204000  | -0.918783000 | 0.000080000  |
|                   |  |  |  | 6  | 1.907471000  | -0.329698000 | -0.000169000 |
|                   |  |  |  | 6  | 0.669868000  | 0.430206000  | 0.000008000  |
|                   |  |  |  | 8  | 0.630990000  | 1.638161000  | 0.000005000  |
|                   |  |  |  | 8  | -0.393487000 | -0.359674000 | 0.000032000  |
|                   |  |  |  | 6  | -1.673336000 | 0.306695000  | 0.000034000  |
|                   |  |  |  | 6  | -2.738409000 | -0.750708000 | -0.000023000 |
|                   |  |  |  | 1  | 3.882301000  | -1.444585000 | 0.000123000  |
|                   |  |  |  | 1  | -1.728625000 | 0.943076000  | -0.883354000 |
|                   |  |  |  | 1  | -1.728653000 | 0.943009000  | 0.883468000  |
|                   |  |  |  | 1  | -3.720662000 | -0.285393000 | -0.000061000 |
|                   |  |  |  | 1  | -2.658549000 | -1.386017000 | -0.886332000 |
|                   |  |  |  | 1  | -2.658630000 | -1.386031000 | 0.886282000  |
|                   |  |  |  |    |              | PPhMe2_1     |              |
|                   |  |  |  | 15 | 1.642440000  | -0.171555000 | -0.565896000 |
|                   |  |  |  | 6  | 2.127633000  | -1.287635000 | -0.796042000 |
|                   |  |  |  | 6  | -0.138403000 | -0.022981000 | -0.229314000 |
|                   |  |  |  | 6  | -0.920188000 | -1.181999000 | -0.298399000 |

|    |              |               |              |    |              |              |              |
|----|--------------|---------------|--------------|----|--------------|--------------|--------------|
| 6  | -2.289979000 | -1.133418000  | -0.084413000 | 1  | -3.646333000 | 0.734954000  | 2.099780000  |
| 6  | -2.910899000 | 0.083043000   | 0.186488000  | 1  | -1.801532000 | -0.568347000 | 1.120690000  |
| 6  | -2.149285000 | 1.242693000   | 0.242594000  | 1  | 2.757170000  | -0.165629000 | -1.852900000 |
| 6  | -0.772882000 | 1.190591000   | 0.039366000  | 1  | 4.817483000  | 0.751276000  | -0.847798000 |
| 6  | 2.292240000  | 1.398674000   | 0.084432000  | 1  | 4.674790000  | 2.247823000  | 1.122723000  |
| 1  | 1.696240000  | -2.277250000  | 0.643594000  | 1  | 2.464083000  | 2.803343000  | 2.087467000  |
| 1  | 3.213880000  | -1.394071000  | 0.796301000  | 1  | 0.410606000  | 1.860880000  | 1.109632000  |
| 1  | 1.804486000  | -0.901286000  | 1.765341000  | 1  | 1.415833000  | -1.289581000 | 1.101419000  |
| 1  | -0.447556000 | -2.132042000  | -0.525748000 | 1  | 1.204095000  | -3.538844000 | 2.078907000  |
| 1  | -2.875544000 | -2.042884000  | -0.134105000 | 1  | -0.392083000 | -5.170697000 | 1.121751000  |
| 1  | -3.980306000 | 0.124516000   | 0.348909000  | 1  | -1.767891000 | -4.540818000 | -0.841494000 |
| 1  | -2.623964000 | 2.193836000   | 0.449473000  | 1  | -1.531308000 | -2.298545000 | -1.846044000 |
| 1  | -0.197774000 | 2.106583000   | 0.092497000  |    |              |              |              |
| 1  | 2.032410000  | 2.230209000   | -0.571068000 | 15 | 0.004573000  | -0.000035000 | 1.480450000  |
| 1  | 1.931196000  | 1.606589000   | 1.094689000  | 6  | -0.752235000 | -1.450780000 | 0.691724000  |
| 1  | 3.380910000  | 1.325329000   | 0.107785000  | 6  | 1.637079000  | 0.070425000  | 0.687635000  |
|    |              | PPhMe2_2      |              | 6  | -0.876449000 | 1.377422000  | 0.689362000  |
| 15 | 1.625943000  | -0.648305000  | -0.000021000 | 6  | -0.755727000 | 2.638239000  | 1.270624000  |
| 6  | 2.224085000  | 0.373922000   | 1.389093000  | 6  | -1.359618000 | 3.761782000  | 0.716261000  |
| 6  | -0.152144000 | -0.235719000  | -0.000022000 | 6  | -2.124745000 | 3.624824000  | -0.441109000 |
| 6  | -1.079668000 | -1.277431000  | -0.000073000 | 6  | -2.268883000 | 2.365339000  | -1.028637000 |
| 6  | -2.446982000 | -1.016795000  | -0.000070000 | 6  | -1.649569000 | 1.261038000  | -0.471166000 |
| 6  | -2.901214000 | 0.295410000   | -0.000017000 | 6  | 2.670618000  | -0.655725000 | 1.276437000  |
| 6  | -1.986236000 | 1.345377000   | 0.000035000  | 6  | 3.945805000  | -0.696624000 | 0.722504000  |
| 6  | -0.623728000 | 1.080020000   | 0.000033000  | 6  | 4.207127000  | 0.022988000  | -0.442820000 |
| 6  | 2.224141000  | 0.374097000   | -1.388982000 | 6  | 3.186444000  | 0.768976000  | -1.037702000 |
| 1  | 1.821290000  | -0.0003181000 | 2.329799000  | 6  | 1.920526000  | 0.787166000  | -0.480208000 |
| 1  | 3.312514000  | 0.303672000   | 1.434634000  | 6  | -0.255875000 | -2.079052000 | -0.455504000 |
| 1  | 1.946765000  | 1.424793000   | 1.276708000  | 6  | -0.907234000 | -3.166208000 | -1.010925000 |
| 1  | -0.724319000 | -2.301948000  | -0.000116000 | 6  | -2.083220000 | -3.652420000 | -0.434636000 |
| 1  | -3.153542000 | -1.837167000  | -0.000110000 | 6  | -2.593102000 | -3.041728000 | -0.710584000 |
| 1  | -3.963783000 | 0.502974000   | -0.000015000 | 6  | -1.917998000 | -1.958534000 | 1.262751000  |
| 1  | -2.337257000 | 2.369734000   | 0.000077000  | 8  | 5.411835000  | 0.059293000  | -1.053795000 |
| 1  | 0.078881000  | 1.906504000   | 0.000076000  | 8  | -2.761616000 | 4.649135000  | -1.050483000 |
| 1  | 1.821381000  | -0.002884000  | -2.329752000 | 8  | -2.656442000 | -4.714194000 | -1.042993000 |
| 1  | 1.946829000  | 1.424956000   | -1.276476000 | 6  | 6.469551000  | -0.685912000 | -0.482610000 |
| 1  | 3.312571000  | 0.303842000   | -1.434490000 | 6  | -2.638525000 | 5.939404000  | -0.484290000 |
|    |              | PPh2Me_1      |              | 6  | -3.849091000 | -5.233980000 | -0.488467000 |
| 15 | -0.018558000 | 1.382310000   | -0.705232000 | 1  | -0.173475000 | -0.173475000 | 2.179342000  |
| 6  | 1.400440000  | 0.311023000   | -0.321262000 | 1  | -1.239135000 | 4.723693000  | 1.193702000  |
| 6  | -1.402963000 | 0.308157000   | -0.201509000 | 1  | -2.870297000 | -2.276249000 | -1.924559000 |
| 6  | 0.006470000  | 2.555373000   | 0.689845000  | 1  | -1.768963000 | 0.294141000  | -0.946338000 |
| 6  | -1.377233000 | -0.424994000  | 0.988251000  | 1  | 2.478754000  | -1.206466000 | 2.191628000  |
| 6  | -2.462888000 | -1.204911000  | 1.359237000  | 1  | 4.721076000  | -1.273451000 | 1.206769000  |
| 6  | -3.590847000 | -1.261893000  | 0.542969000  | 1  | 3.408549000  | 1.325729000  | -1.939444000 |
| 6  | -3.626874000 | -0.539129000  | -0.641854000 | 1  | 1.141541000  | 1.367518000  | -0.960979000 |
| 6  | -2.534605000 | 0.241051000   | -1.012301000 | 1  | 0.651072000  | -1.713428000 | -0.923205000 |
| 6  | 1.472730000  | -0.942087000  | -0.940471000 | 1  | -0.522944000 | -3.654680000 | -1.897505000 |
| 6  | 2.556646000  | -1.779982000  | -0.726480000 | 1  | -3.496790000 | -3.403727000 | -1.180160000 |
| 6  | 3.600051000  | -1.373999000  | 0.102304000  | 1  | -2.314025000 | -1.497156000 | 2.161602000  |
| 6  | 3.545041000  | -0.128735000  | 0.713071000  | 1  | 7.336840000  | -0.531001000 | -1.118709000 |
| 6  | 2.451549000  | 0.708395000   | 0.505008000  | 1  | 6.697342000  | -0.338199000 | 0.527698000  |
| 1  | 0.822831000  | 3.268540000   | 0.571069000  | 1  | 6.230641000  | -1.751553000 | -0.451985000 |
| 1  | -0.929719000 | 3.114914000   | 0.673108000  | 1  | -3.209768000 | 6.611662000  | -1.118826000 |
| 1  | 0.102950000  | 2.049975000   | 1.653511000  | 1  | -3.046334000 | 5.966871000  | 0.529018000  |
| 1  | -0.497252000 | -0.385778000  | 1.622396000  | 1  | -1.595355000 | 6.263626000  | -0.462852000 |
| 1  | -2.432900000 | -1.770231000  | 2.282183000  | 1  | -3.687763000 | -5.591058000 | 0.531510000  |
| 1  | -4.437065000 | -1.872191000  | 0.831979000  | 1  | -4.643697000 | -4.484000000 | -0.486730000 |
| 1  | -4.500247000 | -0.583511000  | -1.280042000 | 1  | -4.145337000 | -6.068957000 | -1.117734000 |
| 1  | -2.558109000 | 0.802479000   | -1.939527000 |    |              |              |              |
| 1  | 0.665417000  | -1.262902000  | -1.591051000 | 15 | -0.095693000 | 0.040753000  | 1.527373000  |
| 1  | 2.590886000  | -2.749414000  | -1.207477000 | 6  | 0.738510000  | -1.423874000 | 0.848028000  |
| 1  | 4.448399000  | -2.025529000  | 0.268142000  | 6  | 0.754304000  | 1.407822000  | 0.690348000  |
| 1  | 4.351600000  | 0.195444000   | 1.358799000  | 6  | -1.701784000 | -0.021862000 | 0.678557000  |
| 1  | 2.426471000  | 1.673948000   | 0.994546000  | 6  | -2.753949000 | 0.706414000  | 1.230024000  |
|    |              | PPh3_1        |              | 6  | -4.010323000 | 0.746869000  | 0.633503000  |
| 15 | 0.000659000  | 0.001392000   | -1.231171000 | 6  | -4.232323000 | 0.025800000  | -0.538509000 |
| 6  | -0.050698000 | -1.634047000  | -0.436473000 | 6  | -3.192217000 | -0.721280000 | -1.098670000 |
| 6  | 1.442281000  | 0.773932000   | -0.435775000 | 6  | -1.947140000 | -0.740463000 | -0.497982000 |
| 6  | -1.389925000 | 0.862097000   | -0.434737000 | 6  | 1.740318000  | 2.092724000  | 1.395544000  |
| 6  | -1.768306000 | 2.090386000   | -0.984832000 | 6  | 2.472028000  | 3.126059000  | 0.816400000  |
| 6  | -2.797126000 | 2.833147000   | -0.421812000 | 6  | 2.202476000  | 3.497271000  | -0.499097000 |
| 6  | -3.477206000 | 2.346046000   | 0.690084000  | 6  | 1.208147000  | 2.826369000  | -1.219044000 |
| 6  | -3.118612000 | 1.119384000   | 1.236039000  | 6  | 0.499594000  | 1.796525000  | -0.630823000 |
| 6  | -2.077770000 | 0.382379000   | 0.680241000  | 6  | 1.799206000  | -1.388478000 | -0.049166000 |
| 6  | 2.695041000  | 0.477718000   | -0.981224000 | 6  | 2.401064000  | -2.558682000 | -0.513252000 |
| 6  | 3.853966000  | 0.994788000   | -0.418590000 | 6  | 1.929483000  | -3.797623000 | -0.079780000 |
| 6  | 3.773508000  | 1.835120000   | 0.687786000  | 6  | 0.863839000  | -3.846517000 | 0.825954000  |
| 6  | 2.532066000  | 2.147905000   | 1.228315000  | 6  | 0.290139000  | -2.679064000 | 1.286260000  |
| 6  | 1.372033000  | 1.617098000   | 0.673200000  | 8  | 2.844900000  | 4.490932000  | -1.149938000 |
| 6  | 0.719649000  | -1.997901000  | 0.668102000  | 8  | -5.415356000 | -0.011486000 | -1.189688000 |
| 6  | 0.598714000  | -3.267950000  | 1.223064000  | 8  | 2.440088000  | -4.981882000 | -0.473943000 |
| 6  | -0.298391000 | -4.183819000  | 0.686840000  | 6  | 3.855994000  | 5.194567000  | -0.454674000 |
| 6  | -1.071063000 | -3.830416000  | -0.415206000 | 6  | -6.492242000 | 0.731839000  | -0.653096000 |
| 6  | -0.939015000 | -2.568247000  | -0.977696000 | 6  | 3.520934000  | -4.967763000 | -1.385142000 |
| 1  | -1.248263000 | 2.463829000   | -1.860841000 | 1  | -2.592641000 | 1.257840000  | 2.150397000  |
| 1  | -3.075001000 | 3.785352000   | -0.855500000 | 1  | -4.801179000 | 1.324849000  | 1.090456000  |
| 1  | -4.286407000 | 2.918412000   | 1.125343000  | 1  | -3.384137000 | -1.278184000 | -2.007184000 |

|    |              |              |              |    |               |              |              |
|----|--------------|--------------|--------------|----|---------------|--------------|--------------|
| 1  | -1.151957000 | -1.322477000 | -0.950169000 | 6  | 1.917790000   | -0.827997000 | -0.526690000 |
| 1  | 1.945806000  | 1.816056000  | 2.424077000  | 6  | 2.656215000   | 0.683626000  | 1.191602000  |
| 1  | 3.230857000  | 3.633637000  | 1.394873000  | 6  | 3.188876000   | -0.819133000 | -1.088747000 |
| 1  | 1.010808000  | 3.132050000  | -2.238835000 | 1  | 1.143218000   | -1.427430000 | -0.989520000 |
| 1  | -0.264067000 | 1.284868000  | -1.205667000 | 6  | 3.927227000   | 0.717099000  | 0.636554000  |
| 1  | 2.176988000  | -0.437143000 | -0.404670000 | 1  | 2.452831000   | 1.258506000  | 2.088124000  |
| 1  | 3.225747000  | -2.490834000 | -1.208896000 | 6  | 4.164866000   | -0.041711000 | -0.495176000 |
| 1  | 0.511813000  | -4.814548000 | 1.159330000  | 1  | 3.423939000   | -1.398669000 | -1.971322000 |
| 1  | -0.528778000 | -2.734210000 | 1.996626000  | 1  | 4.724784000   | 1.304717000  | 1.070734000  |
| 1  | 4.242928000  | 5.941268000  | -1.142722000 | 9  | -2.722190000  | -4.657880000 | -1.033282000 |
| 1  | 3.452783000  | 5.693367000  | 0.429762000  | 9  | -2.679529000  | 4.685085000  | -1.028204000 |
| 1  | 4.666853000  | 4.526489000  | -0.154753000 | 9  | 5.396891000   | -0.027630000 | -1.034500000 |
| 1  | -7.338251000 | 0.574992000  | PcCy3_1      |    |               |              |              |
| 1  | -6.751304000 | 0.384117000  | 0.349742000  | 15 | 0.106151000   | 0.386465000  | -0.645503000 |
| 1  | -6.256116000 | 1.797956000  | -0.615575000 | 6  | -1.685455000  | 0.139043000  | -0.292040000 |
| 1  | 3.237581000  | -4.492318000 | -2.327452000 | 6  | 0.660744000   | 1.430814000  | 0.780386000  |
| 1  | 4.385240000  | -4.447782000 | -0.964817000 | 6  | 0.845271000   | -1.278370000 | -0.276487000 |
| 1  | 3.783016000  | -6.005728000 | -1.572059000 | 6  | -0.208044000  | 2.987396000  | 0.987396000  |
|    |              | Pani3_3      |              | 6  | -0.081751000  | 3.666532000  | -0.163183000 |
| 15 | 0.000358000  | -0.000419000 | -1.710164000 | 6  | 1.372845000   | 4.095145000  | -0.323625000 |
| 6  | -1.155592000 | -1.155492000 | -0.918840000 | 6  | 2.272413000   | 2.885585000  | -0.551469000 |
| 6  | -0.422644000 | 1.578205000  | -0.919290000 | 6  | 2.119536000   | 1.862334000  | 0.571119000  |
| 6  | 1.578976000  | -0.424164000 | -0.919729000 | 6  | -2.036825000  | -0.454262000 | 1.071172000  |
| 6  | 2.747118000  | 0.103984000  | -1.486342000 | 6  | -3.549121000  | -0.503230000 | 1.268932000  |
| 6  | 3.987482000  | -0.139631000 | -0.929783000 | 6  | -4.208147000  | -1.315549000 | 0.160784000  |
| 6  | 4.097224000  | -0.944278000 | 0.208720000  | 6  | -3.857272000  | -0.743677000 | -1.207560000 |
| 6  | 2.949870000  | -1.490917000 | 0.779073000  | 6  | -2.345273000  | -0.680614000 | -1.401583000 |
| 6  | 1.705421000  | -1.222146000 | 0.212951000  | 6  | 1.292491000   | -1.564263000 | -1.157574000 |
| 6  | -1.479713000 | 2.313797000  | -1.472913000 | 6  | 1.781985000   | -3.003111000 | 1.296874000  |
| 6  | -1.890407000 | 3.509147000  | -0.916306000 | 6  | 2.933459000   | -3.277957000 | 0.338349000  |
| 6  | -1.234153000 | 4.018315000  | 0.208911000  | 6  | 2.509068000   | -2.994628000 | -1.096715000 |
| 6  | -0.171341000 | 3.310624000  | 0.765245000  | 6  | 1.999477000   | -1.565519000 | -1.243407000 |
| 6  | 0.219393000  | 2.098482000  | 0.199751000  | 1  | -2.113686000  | 1.150119000  | -0.347988000 |
| 6  | -1.923523000 | -0.860153000 | 0.202937000  | 1  | 0.602032000   | 0.826357000  | 1.689066000  |
| 6  | -2.778314000 | -1.803776000 | 0.769116000  | 1  | 0.038784000   | -1.986670000 | -0.518169000 |
| 6  | -2.864271000 | -3.076765000 | 0.210359000  | 1  | -1.250928000  | 2.397296000  | 1.156724000  |
| 6  | -2.098627000 | -3.389960000 | -0.917352000 | 1  | 0.136787000   | 3.168606000  | 1.904735000  |
| 6  | -1.267960000 | -2.437513000 | -1.474324000 | 1  | -0.429379000  | 3.201921000  | -1.093185000 |
| 8  | -1.687803000 | 5.198700000  | 0.685135000  | 1  | -0.718236000  | 4.535221000  | 0.018717000  |
| 8  | 5.346569000  | -1.144491000 | 0.682846000  | 1  | 1.477398000   | 4.807048000  | -1.145221000 |
| 8  | -3.661181000 | -4.059073000 | 0.685655000  | 1  | 1.689193000   | 4.610769000  | -0.591378000 |
| 6  | -1.041774000 | 5.749203000  | 1.816233000  | 1  | 2.007688000   | 2.419803000  | -1.505754000 |
| 6  | 5.499188000  | -1.958691000 | 1.828897000  | 1  | 3.316982000   | 3.196150000  | -0.626154000 |
| 6  | -4.455426000 | -3.778017000 | 1.821405000  | 1  | 2.480092000   | 2.307456000  | -1.506528000 |
| 1  | 2.675699000  | 0.717746000  | -2.378310000 | 1  | 2.749927000   | 0.990525000  | 0.371044000  |
| 1  | 4.889238000  | 0.2711252000 | -1.365738000 | 1  | -1.6413251000 | -1.476566000 | -1.118975000 |
| 1  | 3.010380000  | -2.119684000 | 1.656270000  | 1  | -1.561910000  | 0.113678000  | 1.876185000  |
| 1  | 0.822060000  | -1.648981000 | 0.673975000  | 1  | -3.791393000  | -0.922501000 | 2.248165000  |
| 1  | -1.986762000 | 1.935575000  | -2.354608000 | 1  | -3.943818000  | 0.519611000  | 1.249331000  |
| 1  | -2.709487000 | 4.074983000  | -1.341799000 | 1  | -3.849147000  | -2.350012000 | 0.217883000  |
| 1  | 0.354412000  | 3.687284000  | 1.631354000  | 1  | -5.291373000  | -1.344341000 | 0.297269000  |
| 1  | 1.043282000  | 1.557088000  | 0.650395000  | 1  | -4.316024000  | -1.338153000 | -0.200834000 |
| 1  | -1.863423000 | 0.123288000  | 0.654875000  | 1  | -4.266484000  | 0.270081000  | -1.287078000 |
| 1  | -3.364489000 | -1.536646000 | 1.637171000  | 1  | -2.098993000  | -0.254188000 | -2.377783000 |
| 1  | -2.182500000 | -4.381183000 | -1.344555000 | 1  | -1.942663000  | -1.701100000 | -1.386784000 |
| 1  | -0.689896000 | -2.687282000 | -2.358062000 | 1  | 2.114869000   | -0.888426000 | 1.419601000  |
| 1  | -1.548377000 | 6.684575000  | 2.038195000  | 1  | 0.484370000   | -1.370288000 | 1.865413000  |
| 1  | -1.120033000 | 5.083492000  | 2.679083000  | 1  | 2.085623000   | -3.198050000 | 2.328049000  |
| 1  | 0.012320000  | 5.949958000  | 1.610202000  | 1  | 0.954666000   | -3.686094000 | 1.069898000  |
| 1  | 6.563757000  | -1.994252000 | 2.044055000  | 1  | 3.775860000   | -2.625956000 | 0.598119000  |
| 1  | 4.971889000  | -1.535650000 | 2.687316000  | 1  | 3.281883000   | -4.308089000 | 0.440077000  |
| 1  | 5.134534000  | -2.972089000 | 1.644886000  | 1  | 3.336419000   | -3.174787000 | -1.786881000 |
| 1  | -3.835110000 | -3.521708000 | 2.683680000  | 1  | 1.703614000   | -3.685636000 | -1.372513000 |
| 1  | -5.153226000 | -2.960926000 | 1.623256000  | 1  | 1.676920000   | -1.766654000 | -2.270347000 |
| 1  | -5.015895000 | -4.683152000 | 2.039410000  | 1  | 2.817595000   | -0.863250000 | -1.036057000 |
|    |              | Ppfp3_1      |              |    |               |              |              |
| 15 | 0.001774000  | -0.000195000 | 1.410656000  | 15 | 0.027058000   | PcCy3_2      | -1.038806000 |
| 6  | -0.749795000 | 1.452724000  | 0.616063000  | 6  | -0.263882000  | 1.546478000  | -0.291171000 |
| 6  | -0.223359000 | 2.097757000  | -0.503068000 | 6  | 1.422384000   | -0.823160000 | -0.057364000 |
| 6  | -1.939390000 | 1.932282000  | 1.173202000  | 6  | -1.430520000  | -1.096262000 | -0.457973000 |
| 6  | -0.868161000 | 3.194544000  | -1.063164000 | 6  | 2.726623000   | -0.184851000 | -0.544024000 |
| 1  | 0.698150000  | 1.746797000  | -0.950976000 | 6  | 3.929271000   | -0.725642000 | 0.219709000  |
| 6  | -2.605143000 | 3.015855000  | 0.619457000  | 6  | 4.013320000   | -2.239284000 | 0.068184000  |
| 1  | -2.350753000 | 1.448370000  | 2.052376000  | 6  | 2.723049000   | -2.895181000 | 0.542810000  |
| 6  | -2.048781000 | 3.625871000  | -0.490457000 | 6  | 1.509918000   | -2.342780000 | -0.200309000 |
| 1  | -0.470183000 | 3.706601000  | -1.928867000 | 6  | 0.220387000   | 2.639654000  | -1.238139000 |
| 1  | -3.528157000 | 3.393675000  | 1.038088000  | 6  | -0.170029000  | 4.042106000  | -0.727317000 |
| 6  | -0.882086000 | -1.375625000 | 0.614359000  | 6  | 0.363849000   | 4.264840000  | 0.680126000  |
| 6  | -0.722632000 | -2.642696000 | 1.183143000  | 6  | -0.125986000  | 3.172850000  | 1.622439000  |
| 6  | -1.685298000 | -1.243003000 | -0.519116000 | 6  | 0.286203000   | 1.794060000  | 1.114476000  |
| 6  | -1.330116000 | -3.759925000 | 0.628569000  | 6  | -2.689840000  | -0.679348000 | -1.221564000 |
| 1  | -0.112745000 | -2.755822000 | 2.072562000  | 6  | -3.863088000  | -1.590063000 | -0.872762000 |
| 6  | -2.314310000 | -2.348013000 | -1.080040000 | 6  | -4.122412000  | -1.592978000 | 0.628953000  |
| 1  | -1.826113000 | -0.270655000 | -0.975309000 | 6  | -2.868723000  | -2.004988000 | 1.391174000  |
| 6  | -2.118000000 | -3.583817000 | -0.494528000 | 6  | -1.702586000  | -1.084234000 | -1.043349000 |
| 1  | -1.211023000 | -4.746116000 | 1.056391000  | 1  | -1.359338000  | 1.628642000  | -0.234090000 |
| 1  | -2.942918000 | -2.260318000 | -1.956143000 | 1  | 1.294856000   | -0.591452000 | 1.007027000  |
| 6  | 1.634732000  | -0.076656000 | 0.614353000  | 1  | -1.208764000  | -2.129192000 | -0.759489000 |

|    |              |              |              |    |              |              |              |
|----|--------------|--------------|--------------|----|--------------|--------------|--------------|
| 1  | 2.843743000  | -0.414293000 | -1.610851000 | 6  | -2.643472000 | 0.884946000  | -0.274277000 |
| 1  | 2.673353000  | 0.904346000  | -0.462077000 | 6  | -3.633627000 | 1.789435000  | 0.447770000  |
| 1  | 4.847274000  | -0.251440000 | -0.134322000 | 6  | -5.058367000 | 1.597090000  | -0.049381000 |
| 1  | 3.824443000  | -0.473900000 | 1.281676000  | 6  | 0.555739000  | -2.729441000 | -0.273723000 |
| 1  | 4.170882000  | -2.481698000 | -0.989232000 | 6  | 0.267454000  | -4.038865000 | -0.448776000 |
| 1  | 4.868670000  | -2.635764000 | 0.619530000  | 6  | 1.143654000  | -5.177641000 | -0.050559000 |
| 1  | 2.775210000  | -3.979337000 | 0.420233000  | 6  | 2.088643000  | 1.845087000  | -0.273240000 |
| 1  | 2.598074000  | -2.699478000 | 1.614277000  | 6  | 3.367218000  | 2.249658000  | 0.449221000  |
| 1  | 0.601809000  | -2.815440000 | 0.181204000  | 6  | 3.916221000  | 3.576934000  | -0.051336000 |
| 1  | 1.582611000  | -2.596885000 | -1.266207000 | 1  | -0.187842000 | -1.435479000 | 1.296820000  |
| 1  | 1.312742000  | 2.587954000  | -1.325097000 | 1  | -1.374592000 | -1.840086000 | 0.056860000  |
| 1  | -0.183913000 | 2.481856000  | -2.239536000 | 1  | -1.151165000 | 0.878571000  | 1.297781000  |
| 1  | 0.191876000  | 4.804296000  | -1.409951000 | 1  | -0.906933000 | 2.109828000  | 0.060441000  |
| 1  | -1.263955000 | 4.105168000  | -0.709571000 | 1  | 1.333972000  | 0.558038000  | 1.299145000  |
| 1  | 1.459890000  | 4.247555000  | 0.654830000  | 1  | 2.278887000  | -0.270543000 | 0.061974000  |
| 1  | 0.066879000  | 5.250358000  | 1.045443000  | 1  | -2.687428000 | 1.085681000  | -1.350127000 |
| 1  | 0.262254000  | 3.333013000  | 2.630958000  | 1  | -2.951998000 | -0.158097000 | -0.143188000 |
| 1  | -1.219739000 | 3.217891000  | 1.687157000  | 1  | -3.582394000 | 1.589294000  | 1.522417000  |
| 1  | -0.049107000 | 1.019932000  | 1.807026000  | 1  | -3.328134000 | 2.831498000  | 0.312332000  |
| 1  | 1.381061000  | 1.744230000  | 1.088475000  | 1  | -5.385013000 | -0.565577000 | 0.100836000  |
| 1  | -2.950809000 | 0.352325000  | -0.955412000 | 1  | -5.761122000 | 2.249640000  | 0.470622000  |
| 1  | -2.497327000 | -0.692999000 | -2.297798000 | 1  | -5.128252000 | 1.813071000  | -1.117871000 |
| 1  | -4.758090000 | -1.278887000 | -1.416125000 | 1  | 0.405118000  | -2.867993000 | -1.349719000 |
| 1  | -3.627678000 | -2.610330000 | -1.196863000 | 1  | 1.612935000  | -2.475231000 | -0.141216000 |
| 1  | -4.413118000 | -0.583392000 | 0.942816000  | 1  | 0.418282000  | -3.894655000 | 1.522991000  |
| 1  | -4.955346000 | -2.256218000 | 0.872161000  | 1  | -0.788540000 | -4.239726000 | 0.315989000  |
| 1  | -3.053284000 | -1.994828000 | 2.467826000  | 1  | 2.201156000  | -4.945353000 | 0.094682000  |
| 1  | -2.603923000 | -3.033573000 | 1.118987000  | 1  | 0.931967000  | -6.115644000 | -6.171824000 |
| 1  | -0.805685000 | -1.370836000 | 1.600531000  | 1  | 0.986564000  | -5.347991000 | -1.118048000 |
| 1  | -1.959039000 | -0.061132000 | 1.344981000  | 1  | 2.285565000  | 1.780838000  | -1.348864000 |
|    |              | PCy3_3       |              | 1  | 1.341497000  | 2.635572000  | -0.143935000 |
| 15 | 0.094641000  | 0.062457000  | -0.923813000 | 1  | 3.166676000  | 2.309842000  | 1.523300000  |
| 6  | -0.809117000 | -1.457741000 | -0.393284000 | 1  | 4.115401000  | 4.168161000  | 0.317805000  |
| 6  | -0.688850000 | 1.415066000  | 0.062295000  | 1  | 4.141931000  | 3.525114000  | -1.118861000 |
| 6  | 1.724640000  | -0.080145000 | -0.039423000 | 1  | 3.186973000  | 4.377206000  | 0.093400000  |
| 6  | -2.121069000 | 1.668193000  | -0.409021000 | 1  | 4.831349000  | 3.860383000  | 0.470344000  |
| 6  | -2.777384000 | 2.810163000  | 0.359558000  |    |              | PBu3_2       |              |
| 6  | -1.957869000 | 4.087046000  | 0.236775000  | 15 | -0.158176000 | -0.115620000 | -0.103043000 |
| 6  | -0.539017000 | 3.846528000  | 0.732743000  | 6  | 0.783827000  | -1.529855000 | -0.803576000 |
| 6  | 0.125741000  | 2.707168000  | -0.033621000 | 6  | 0.555126000  | 1.242318000  | -1.112626000 |
| 6  | -1.985356000 | -1.819666000 | -1.305191000 | 6  | -1.742422000 | -0.342013000 | -1.002991000 |
| 6  | -2.520971000 | -3.202938000 | -0.947024000 | 6  | -0.286640000 | 2.519933000  | -1.103188000 |
| 6  | -2.931628000 | -3.266182000 | 0.519880000  | 6  | -0.656358000 | 3.012750000  | 0.294115000  |
| 6  | -1.764637000 | -2.893462000 | 1.427437000  | 6  | 0.558783000  | 3.229799000  | 1.184118000  |
| 6  | -1.233032000 | -1.508682000 | 1.072422000  | 6  | 2.299753000  | -1.387207000 | -0.672418000 |
| 6  | 2.786817000  | 0.655495000  | -0.867568000 | 6  | -2.776142000 | -1.103613000 | 0.746713000  |
| 6  | 4.134145000  | 0.685959000  | -0.157845000 | 6  | 4.293084000  | -1.133438000 | 0.850849000  |
| 6  | 4.613710000  | -0.732680000 | 0.118431000  | 6  | -2.438215000 | -1.669650000 | 0.697772000  |
| 6  | 3.569825000  | -1.498191000 | 0.920451000  | 6  | -2.641979000 | -0.791546000 | -0.791546000 |
| 6  | 2.212375000  | -1.505719000 | 0.221211000  | 6  | -3.393915000 | -0.818952000 | 1.496439000  |
| 6  | -0.066575000 | -2.251169000 | -0.553823000 | 1  | 0.454800000  | -2.433707000 | -0.280180000 |
| 1  | -0.710123000 | 1.109717000  | 1.117548000  | 1  | 0.506505000  | -1.646455000 | -1.858213000 |
| 1  | 1.624465000  | 0.422133000  | 0.934095000  | 1  | 1.556871000  | 1.450064000  | -0.723686000 |
| 1  | -2.098151000 | 1.914728000  | -1.478503000 | 1  | 0.679975000  | 0.885953000  | -2.142002000 |
| 1  | -2.719075000 | 0.761367000  | -0.304600000 | 1  | -2.395981000 | 0.493808000  | -0.735070000 |
| 1  | -3.796134000 | 2.967159000  | -0.001672000 | 1  | -1.546359000 | -0.262723000 | -2.078913000 |
| 1  | -2.850399000 | 2.532533000  | 1.417762000  | 1  | 0.267853000  | 3.308355000  | -1.622082000 |
| 1  | -1.923661000 | 4.391198000  | -0.815879000 | 1  | -1.200574000 | 2.353283000  | -1.679826000 |
| 1  | -2.427140000 | 4.901867000  | 0.792286000  | 1  | -1.217518000 | 3.945689000  | 0.200942000  |
| 1  | 0.061217000  | 4.754782000  | 0.643952000  | 1  | -1.331420000 | 2.291493000  | 0.769564000  |
| 1  | -0.572956000 | 3.586804000  | 1.797272000  | 1  | 0.280086000  | 3.681454000  | 2.136792000  |
| 1  | 1.135336000  | 2.550285000  | 0.351965000  | 1  | 1.060903000  | 2.283537000  | 1.402901000  |
| 1  | 0.224056000  | 2.987101000  | -1.090927000 | 1  | 1.283524000  | 3.887906000  | 0.697752000  |
| 1  | -2.791450000 | -1.087677000 | -1.194341000 | 1  | 2.775299000  | -2.307017000 | -1.028132000 |
| 1  | -1.668238000 | -1.787661000 | -2.350778000 | 1  | 2.652964000  | -0.587467000 | -1.331612000 |
| 1  | -3.363588000 | -3.462397000 | -1.591888000 | 1  | 2.403225000  | -0.125075000 | 1.069028000  |
| 1  | -1.734669000 | -3.944874000 | -1.129509000 | 1  | 2.334802000  | -1.836983000 | 1.429473000  |
| 1  | -3.752752000 | -2.559780000 | 0.690736000  | 1  | 4.740870000  | -0.397811000 | 0.178379000  |
| 1  | -3.308173000 | -4.260663000 | 0.768914000  | 1  | 4.635346000  | -0.912878000 | 1.862685000  |
| 1  | -2.068191000 | -2.929101000 | 2.476208000  | 1  | 4.681732000  | -2.115368000 | 0.571164000  |
| 1  | -0.959536000 | -3.627155000 | 1.298681000  | 1  | -3.412986000 | -1.676123000 | -1.195878000 |
| 1  | -0.397648000 | -1.232779000 | 1.723961000  | 1  | -1.860657000 | -2.488364000 | -1.136232000 |
| 1  | -2.025728000 | -0.770226000 | 1.242323000  | 1  | -3.185882000 | -2.879158000 | 0.907270000  |
| 1  | 2.893056000  | 0.122980000  | -1.821204000 | 1  | -1.669051000 | -2.081577000 | 1.273912000  |
| 1  | 2.454619000  | 1.665853000  | -1.116360000 | 1  | -2.803317000 | -0.100505000 | 1.517605000  |
| 1  | 4.866365000  | 1.231046000  | -0.757652000 | 1  | -4.334661000 | -0.599876000 | 0.984063000  |
| 1  | 4.028946000  | 1.224803000  | 0.791395000  | 1  | -3.626829000 | -1.083289000 | 2.528695000  |
| 1  | 4.777532000  | -1.243845000 | -0.837317000 |    |              | PBu3_2       |              |
| 1  | 5.569803000  | -0.723822000 | 0.646293000  | 15 | -0.158157000 | -0.115638000 | -0.102944000 |
| 1  | 3.900408000  | -2.523637000 | 1.100745000  | 6  | -1.742296000 | -0.342451000 | -1.003027000 |
| 1  | 3.455026000  | -1.021829000 | 1.901204000  | 6  | 0.784083000  | -1.529759000 | -0.803421000 |
| 1  | 1.497474000  | -2.059504000 | 0.833055000  | 6  | 0.554960000  | 1.242392000  | -1.112566000 |
| 1  | 2.296536000  | -2.036374000 | -0.736107000 | 6  | 2.300002000  | -1.386916000 | -0.672375000 |
|    |              | PBu3_1       |              | 6  | 2.776490000  | -1.103729000 | 0.746807000  |
| 15 | -0.000566000 | 0.001305000  | -0.642906000 | 6  | 4.293460000  | -1.132955000 | 0.850717000  |
| 6  | -0.322303000 | -1.584637000 | 0.217882000  | 6  | -2.437998000 | -1.670027000 | -0.697745000 |
| 6  | -1.213186000 | 1.071207000  | 0.219191000  | 6  | -2.641953000 | -1.938762000 | 0.791579000  |
| 6  | 1.532631000  | 0.514424000  | 0.220653000  | 6  | -3.394108000 | -0.819158000 | 1.496218000  |



|   |              |              |              |    |              |              |              |
|---|--------------|--------------|--------------|----|--------------|--------------|--------------|
| 6 | -0.286962000 | 2.519905000  | -1.103210000 | 1  | 1.821339000  | -0.001462000 | -2.328867000 |
| 6 | -0.656787000 | 3.012764000  | 0.294051000  | 1  | 1.936536000  | 1.423026000  | -1.268759000 |
| 6 | 0.558294000  | 3.229685000  | 1.184061000  | 1  | 3.309444000  | 0.311487000  | -1.429685000 |
| 1 | -2.395967000 | 0.493428000  | -0.735287000 |    |              | PPh2Me_1_H2O |              |
| 1 | -1.546119000 | -0.263168000 | -2.078935000 | 15 | -0.016320000 | 1.393785000  | -0.707289000 |
| 1 | 0.455194000  | -2.433623000 | -0.279950000 | 6  | 1.395761000  | 0.312251000  | -0.327051000 |
| 1 | 0.506705000  | -1.646468000 | -1.858028000 | 6  | -1.399480000 | 0.318495000  | -0.204495000 |
| 1 | 1.556668000  | 1.450271000  | -0.723604000 | 6  | 0.016876000  | 2.555133000  | 0.696008000  |
| 1 | 0.679892000  | 0.885999000  | -2.141919000 | 6  | -1.371644000 | -0.401732000 | 0.993292000  |
| 1 | 2.775652000  | -2.306533000 | -1.028447000 | 6  | -2.451368000 | -1.187735000 | 1.368233000  |
| 1 | 2.653032000  | -0.586901000 | -1.331338000 | 6  | -3.575390000 | -1.264015000 | 0.547826000  |
| 1 | 2.403196000  | -0.125492000 | 1.069579000  | 6  | -3.613360000 | -0.553826000 | -0.644431000 |
| 1 | 2.335571000  | -1.837590000 | 1.429309000  | 6  | -2.526962000 | 0.233042000  | -1.018697000 |
| 1 | 4.635763000  | -0.912723000 | 1.862609000  | 6  | 1.448939000  | -0.950227000 | -0.928654000 |
| 1 | 4.682489000  | -2.114587000 | 0.570520000  | 6  | 2.525806000  | -1.796689000 | -0.711770000 |
| 1 | 4.740833000  | -0.396818000 | 0.178533000  | 6  | 3.579942000  | -1.390300000 | 0.103126000  |
| 1 | -3.412701000 | -1.676641000 | -1.195986000 | 6  | 3.542982000  | -0.135994000 | 0.696894000  |
| 1 | -1.860307000 | -2.488743000 | -1.136025000 | 6  | 2.457149000  | 0.710254000  | 0.485615000  |
| 1 | -3.185779000 | -2.879418000 | 0.907338000  | 1  | 0.835855000  | 3.265350000  | 0.581226000  |
| 1 | -1.669084000 | -2.081635000 | 1.274114000  | 1  | -0.917647000 | 3.116976000  | 0.688482000  |
| 1 | -4.334809000 | -0.600254000 | 0.983684000  | 1  | 0.117109000  | 2.037265000  | 1.652370000  |
| 1 | -3.627128000 | -1.083381000 | 2.528478000  | 1  | -0.495465000 | -0.345947000 | 1.631387000  |
| 1 | -2.803608000 | 0.100360000  | 1.517333000  | 1  | -2.420239000 | -1.742402000 | 2.297259000  |
| 1 | 0.267469000  | 3.308361000  | -1.622120000 | 1  | -4.416895000 | -1.878878000 | 0.839819000  |
| 1 | -1.200865000 | 2.353145000  | -1.679865000 | 1  | -4.483553000 | -0.612593000 | -1.285290000 |
| 1 | -1.218118000 | 3.945592000  | 0.200795000  | 1  | -2.553874000 | 0.784883000  | -1.951249000 |
| 1 | -1.331714000 | 2.291416000  | 0.769550000  | 1  | 0.632647000  | -1.272275000 | -1.567097000 |
| 1 | 1.060567000  | 2.283954000  | 1.402949000  | 1  | 2.545636000  | -2.773105000 | -1.178690000 |
| 1 | 1.282928000  | 3.888298000  | 0.697651000  | 1  | 4.422070000  | -2.048640000 | 0.271982000  |
| 1 | 0.279484000  | 3.681800000  | 2.136683000  | 1  | 4.357506000  | 0.188006000  | 1.332161000  |
|   |              |              |              | 1  | 2.446155000  | 1.682644000  | 0.961595000  |
|   |              |              |              |    |              | PPh3_1_H2O   |              |
|   |              |              |              | 15 | 0.013885000  | -0.001529000 | -1.245028000 |
|   |              |              |              | 6  | 1.518882000  | -0.618259000 | -0.432416000 |
|   |              |              |              | 6  | -0.215304000 | 1.617069000  | -0.449025000 |
|   |              |              |              | 6  | -1.281741000 | -1.000308000 | -0.450804000 |
|   |              |              |              | 6  | -2.568371000 | -0.906714000 | -0.989283000 |
|   |              |              |              | 6  | -3.626802000 | -1.603058000 | -0.421789000 |
|   |              |              |              | 6  | -3.407656000 | -2.420197000 | 0.683110000  |
|   |              |              |              | 6  | -2.129591000 | -2.530584000 | 1.217469000  |
|   |              |              |              | 6  | -1.071979000 | -1.821211000 | 0.657164000  |
|   |              |              |              | 6  | 0.470107000  | 2.698876000  | -1.008532000 |
|   |              |              |              | 6  | 0.384371000  | 3.963021000  | -0.440439000 |
|   |              |              |              | 6  | -0.405485000 | 4.165115000  | 0.686939000  |
|   |              |              |              | 6  | -1.100799000 | 3.098124000  | 1.243849000  |
|   |              |              |              | 6  | -1.003643000 | 1.829298000  | 0.682257000  |
|   |              |              |              | 6  | 2.115191000  | -0.018272000 | 0.676492000  |
|   |              |              |              | 6  | 3.253230000  | -0.575866000 | 1.250813000  |
|   |              |              |              | 6  | 3.800902000  | -1.741893000 | 0.729690000  |
|   |              |              |              | 6  | 3.212699000  | -2.347858000 | -0.376388000 |
|   |              |              |              | 6  | 2.085781000  | -1.780304000 | -0.957838000 |
|   |              |              |              | 1  | -2.738504000 | -0.280341000 | -1.858592000 |
|   |              |              |              | 1  | -4.618875000 | -1.516040000 | -0.845571000 |
|   |              |              |              | 1  | -4.229143000 | -2.971090000 | 1.122230000  |
|   |              |              |              | 1  | -1.953647000 | -3.165901000 | 2.076005000  |
|   |              |              |              | 1  | -0.082563000 | -1.907460000 | 1.090438000  |
|   |              |              |              | 1  | 1.075108000  | 2.545371000  | -1.895726000 |
|   |              |              |              | 1  | 0.924282000  | 4.790626000  | -0.881901000 |
|   |              |              |              | 1  | -0.482161000 | 5.151240000  | 1.126095000  |
|   |              |              |              | 1  | -1.717458000 | 3.251122000  | 2.120193000  |
|   |              |              |              | 1  | -1.542124000 | 1.003440000  | 1.131956000  |
|   |              |              |              | 1  | 1.692010000  | 0.885228000  | 1.099182000  |
|   |              |              |              | 1  | 3.708397000  | -0.099739000 | 2.109765000  |
|   |              |              |              | 1  | 4.684734000  | -2.174852000 | 1.179758000  |
|   |              |              |              | 1  | 3.637031000  | -3.253424000 | -0.790204000 |
|   |              |              |              | 1  | 1.635604000  | -2.249212000 | -1.827850000 |
|   |              |              |              |    |              | Pani3_1_H2O  |              |
|   |              |              |              | 15 | 0.054887000  | 0.001461000  | 1.495063000  |
|   |              |              |              | 6  | -0.303640000 | -1.597221000 | 0.707646000  |
|   |              |              |              | 6  | 1.594487000  | 0.497140000  | 0.672934000  |
|   |              |              |              | 6  | -1.178837000 | 1.082399000  | 0.714765000  |
|   |              |              |              | 6  | -1.463220000 | 2.296177000  | 1.336907000  |
|   |              |              |              | 6  | -2.361586000 | 3.207077000  | 0.790269000  |
|   |              |              |              | 6  | -3.007586000 | 2.890886000  | -0.402302000 |
|   |              |              |              | 6  | -2.746392000 | 1.672906000  | -1.033940000 |
|   |              |              |              | 6  | -1.841808000 | 0.784675000  | -0.481705000 |
|   |              |              |              | 6  | 2.796708000  | 0.210101000  | 1.314904000  |
|   |              |              |              | 6  | 4.026380000  | 0.499321000  | 0.730691000  |
|   |              |              |              | 6  | 4.056144000  | 1.106451000  | -0.521956000 |
|   |              |              |              | 6  | 2.860269000  | 1.414122000  | -1.175685000 |
|   |              |              |              | 6  | 1.648348000  | 1.109058000  | -0.584785000 |
|   |              |              |              | 6  | 0.481034000  | -2.183139000 | -0.289060000 |
|   |              |              |              | 6  | 0.139057000  | -3.409278000 | -0.836068000 |
|   |              |              |              | 6  | -1.006118000 | -4.076190000 | -0.403283000 |
|   |              |              |              | 6  | -1.803620000 | -3.599568000 | -0.590203000 |
|   |              |              |              | 8  | -1.437537000 | -2.286453000 | 1.138262000  |
|   |              |              |              | 8  | 5.200808000  | 1.437371000  | -1.174171000 |
|   |              |              |              | 8  | -3.906821000 | 3.705831000  | -1.013305000 |
|   |              |              |              |    |              | PPhMe2_2_H2O |              |
|   |              |              |              | 15 | 1.626512000  | -0.650236000 | -0.000018000 |
|   |              |              |              | 6  | 2.220857000  | 0.374904000  | 1.387022000  |
|   |              |              |              | 6  | -0.151554000 | -0.239242000 | -0.000019000 |
|   |              |              |              | 6  | -1.081686000 | -1.278699000 | -0.000077000 |
|   |              |              |              | 6  | -2.448397000 | -1.014656000 | -0.000077000 |
|   |              |              |              | 6  | -2.899170000 | 0.298765000  | -0.000020000 |
|   |              |              |              | 6  | -1.981391000 | 1.346359000  | 0.000037000  |
|   |              |              |              | 6  | -0.619425000 | 1.077927000  | 0.000038000  |
|   |              |              |              | 6  | 2.220907000  | 0.375071000  | -1.386913000 |
|   |              |              |              | 1  | 1.821257000  | -0.001744000 | 2.328917000  |
|   |              |              |              | 1  | 3.309393000  | 0.311321000  | 1.429825000  |
|   |              |              |              | 1  | 1.936483000  | 1.422872000  | 1.268984000  |
|   |              |              |              | 1  | -0.730594000 | -2.304419000 | -0.000121000 |
|   |              |              |              | 1  | -3.156832000 | -1.833019000 | -0.000121000 |
|   |              |              |              | 1  | -3.960889000 | 0.509038000  | -0.000020000 |
|   |              |              |              | 1  | -2.329662000 | 2.371317000  | 0.000081000  |
|   |              |              |              | 1  | 0.085001000  | 1.902557000  | 0.000084000  |

|    |              |              |              |    |              |              |              |
|----|--------------|--------------|--------------|----|--------------|--------------|--------------|
| 8  | -1.270991000 | -5.272274000 | -0.993903000 | 6  | -2.763986000 | -1.783124000 | 0.762643000  |
| 6  | 6.431832000  | 1.131811000  | -0.539702000 | 6  | -2.838601000 | -3.062528000 | 0.219912000  |
| 6  | -4.183775000 | 4.955341000  | -0.402505000 | 6  | -2.078005000 | -3.386004000 | -0.906780000 |
| 6  | -2.426863000 | -5.974325000 | -0.567964000 | 6  | -1.257328000 | -2.433995000 | -1.479820000 |
| 1  | -0.972992000 | 2.542513000  | 2.272666000  | 8  | -1.693732000 | 5.193313000  | 0.682610000  |
| 1  | -2.555947000 | 4.139390000  | 1.300589000  | 8  | 5.328379000  | -1.143428000 | 0.704438000  |
| 1  | -3.260574000 | 1.444596000  | -1.958872000 | 8  | -3.627554000 | -4.050839000 | 0.717723000  |
| 1  | -1.645029000 | -0.152246000 | -0.990425000 | 6  | -1.060798000 | 5.718952000  | 1.837487000  |
| 1  | 2.779395000  | -0.253334000 | 2.295279000  | 6  | 5.461941000  | -1.989098000 | 1.834853000  |
| 1  | 4.939012000  | 0.260496000  | 1.257423000  | 6  | -4.404321000 | -3.755900000 | 1.866743000  |
| 1  | 2.905032000  | 1.889422000  | -2.147277000 | 1  | 2.682689000  | 0.752848000  | -2.364414000 |
| 1  | 0.731224000  | 1.347030000  | -1.111167000 | 1  | 4.883822000  | 0.304998000  | -1.330540000 |
| 1  | 1.372218000  | -1.681248000 | -0.646448000 | 1  | 2.981980000  | -2.138926000 | 1.634683000  |
| 1  | 0.748848000  | -3.864939000 | -1.605838000 | 1  | 0.804007000  | -1.667522000 | 0.632484000  |
| 1  | -2.692958000 | -4.010282000 | 0.945239000  | 1  | -1.967515000 | 1.960362000  | -2.396899000 |
| 1  | -2.058077000 | -1.857978000 | 1.918767000  | 1  | -2.692968000 | 4.090513000  | -1.371141000 |
| 1  | 7.216594000  | 1.463071000  | -1.213425000 | 1  | 0.334143000  | 3.662014000  | 1.634744000  |
| 1  | 6.522809000  | 1.659366000  | 0.411544000  | 1  | 1.026408000  | 1.539257000  | 0.640813000  |
| 1  | 6.527731000  | 0.057756000  | -0.369754000 | 1  | -1.864173000 | 0.148120000  | 0.621952000  |
| 1  | -4.907929000 | 5.455838000  | -1.038634000 | 1  | -3.347432000 | -1.511489000 | 1.630683000  |
| 1  | -4.608832000 | 4.818224000  | 0.593556000  | 1  | -2.153921000 | -4.383552000 | -1.320048000 |
| 1  | -3.280352000 | 5.563898000  | -0.331222000 | 1  | -0.679598000 | -2.691933000 | -2.361072000 |
| 1  | -2.366096000 | -6.220617000 | 0.493796000  | 1  | -1.567764000 | 6.650957000  | 2.069853000  |
| 1  | -3.330312000 | -5.390430000 | -0.753907000 | 1  | -1.155672000 | 5.033238000  | 2.681538000  |
| 1  | -2.463052000 | -6.890666000 | -1.149893000 | 1  | -0.004136000 | 5.917438000  | 1.648162000  |
|    |              | Pani3_2_H2O  |              | 1  | 6.522732000  | -2.032910000 | 2.063722000  |
| 15 | 0.100207000  | -0.057388000 | 1.538295000  | 1  | 4.921863000  | -1.584096000 | 2.692719000  |
| 6  | -0.666649000 | 1.443497000  | 0.858701000  | 1  | 5.095202000  | -2.993866000 | 1.616516000  |
| 6  | -0.814825000 | -1.377700000 | 0.696425000  | 1  | -3.766777000 | -3.480241000 | 2.708935000  |
| 6  | 1.702692000  | -0.061512000 | 0.680724000  | 1  | -5.109045000 | -2.946947000 | 1.665263000  |
| 6  | 2.733538000  | -0.817863000 | 1.234374000  | 1  | -4.952837000 | -4.661368000 | 2.109337000  |
| 6  | 3.984835000  | -0.904838000 | 0.631903000  |    |              | Ppfp3_1_H2O  |              |
| 6  | 4.219954000  | -0.202891000 | -0.547574000 | 15 | -0.001524000 | 0.001010000  | 1.429522000  |
| 6  | 3.202566000  | 0.569111000  | -1.113290000 | 6  | 0.525539000  | -1.543281000 | 0.628411000  |
| 6  | 1.962227000  | 0.634659000  | -0.506201000 | 6  | -0.094633000 | -2.096971000 | -0.491707000 |
| 6  | -1.807332000 | -2.044876000 | 1.408920000  | 6  | 1.637168000  | -2.191753000 | -1.174316000 |
| 6  | -2.589623000 | -3.036074000 | 0.822092000  | 6  | 0.382441000  | -3.271271000 | -1.062166000 |
| 6  | -2.364655000 | -3.377890000 | -0.508219000 | 1  | -0.957807000 | -1.613633000 | -0.932530000 |
| 6  | -1.366705000 | -2.724622000 | -1.237635000 | 6  | 2.136812000  | -3.356227000 | 0.610163000  |
| 6  | -0.607143000 | -1.736969000 | -0.640994000 | 1  | 2.120463000  | -1.778485000 | 2.052559000  |
| 6  | -1.762506000 | 1.453377000  | 0.004102000  | 6  | 1.491566000  | -3.871557000 | -0.499210000 |
| 6  | -2.310968000 | 2.648066000  | -0.463919000 | 1  | -0.089725000 | -3.713665000 | -1.928818000 |
| 6  | -1.747154000 | 3.858096000  | -0.077071000 | 1  | 2.998605000  | -3.864804000 | 1.020159000  |
| 6  | -0.646197000 | 3.867463000  | 0.785193000  | 6  | 1.073909000  | 1.277722000  | 0.627763000  |
| 6  | -0.125456000 | 2.677042000  | 1.249996000  | 6  | 1.094283000  | 2.510855000  | 1.181824000  |
| 8  | -3.063852000 | -4.334750000 | -1.171218000 | 6  | 1.849739000  | 0.969152000  | -0.502481000 |
| 8  | 5.407874000  | -0.208584000 | -1.206802000 | 6  | 1.854707000  | 3.524049000  | 0.616541000  |
| 8  | -2.202952000 | 5.073429000  | -0.483475000 | 1  | 0.505169000  | 2.721200000  | 2.067384000  |
| 8  | -4.083690000 | -5.016998000 | -0.459826000 | 6  | 2.629400000  | 1.967424000  | -1.074434000 |
| 6  | 6.463166000  | -0.978436000 | -0.655104000 | 1  | 1.849738000  | -0.017267000 | -0.949899000 |
| 6  | -3.319077000 | 5.096289000  | -1.357264000 | 6  | 2.610011000  | 3.224566000  | -0.502473000 |
| 1  | 2.561293000  | -1.354153000 | 2.161276000  | 1  | 1.876047000  | 4.521711000  | 1.033266000  |
| 1  | 4.759444000  | -1.502368000 | 1.090702000  | 1  | 3.238117000  | 1.781389000  | -1.948838000 |
| 1  | 3.405871000  | 1.108270000  | -2.029789000 | 6  | -1.601828000 | 0.317629000  | 0.627675000  |
| 1  | 1.182921000  | 1.234799000  | -0.961985000 | 6  | -1.765809000 | 1.111956000  | -0.507560000 |
| 1  | -1.979334000 | -1.788531000 | 2.448416000  | 6  | -2.723635000 | -0.301195000 | 1.186664000  |
| 1  | -3.351981000 | -3.532196000 | 1.405207000  | 6  | -3.020441000 | 1.285995000  | -1.079384000 |
| 1  | -1.207099000 | -3.007125000 | -2.270411000 | 1  | -0.911497000 | 1.601351000  | -0.958909000 |
| 1  | 0.157394000  | -1.235192000 | -1.223123000 | 6  | -3.981637000 | -1.151334000 | 0.621505000  |
| 1  | -2.211487000 | 0.520421000  | -0.315033000 | 1  | -2.611296000 | -0.911027000 | 2.076093000  |
| 1  | -3.164749000 | 2.616782000  | -1.125732000 | 1  | -4.099790000 | 0.645533000  | -0.502469000 |
| 1  | -0.222168000 | 4.818379000  | 1.081446000  | 6  | -3.163809000 | 1.901035000  | -1.957373000 |
| 1  | 0.724222000  | 2.697997000  | 1.924793000  | 1  | -4.856578000 | -0.627877000 | 1.042026000  |
| 1  | -4.520177000 | -5.729177000 | -1.153906000 | 9  | 3.360911000  | 4.196296000  | -1.052449000 |
| 1  | -3.671093000 | -5.551201000 | 0.398017000  | 9  | 1.960299000  | -5.007324000 | -1.047865000 |
| 1  | -4.853823000 | -4.322452000 | -0.119053000 | 9  | -5.316919000 | 0.808491000  | -1.052555000 |
| 1  | 7.314276000  | -0.855456000 | -1.318444000 |    |              | PCy3_1_H2O   |              |
| 1  | 6.725646000  | -0.623020000 | 0.343074000  | 15 | 0.109153000  | 0.379639000  | -0.638462000 |
| 1  | 6.191640000  | -2.034484000 | -0.604639000 | 6  | -1.684374000 | 0.154220000  | -0.286071000 |
| 1  | -3.095270000 | 4.576782000  | -2.291103000 | 6  | 0.673614000  | 1.411936000  | 0.790973000  |
| 1  | -4.192310000 | 4.638670000  | -0.888333000 | 6  | 0.827213000  | -1.293813000 | -0.272740000 |
| 1  | -3.526882000 | 6.1411733000 | -1.565838000 | 6  | -0.183634000 | 2.0671709000 | 1.007220000  |
|    |              | Pani3_3_H2O  |              | 6  | -0.047382000 | 3.660892000  | -0.134899000 |
| 15 | 0.001259000  | 0.005077000  | -1.739006000 | 6  | 1.411194000  | 4.076580000  | -0.290045000 |
| 6  | -1.154212000 | -1.144854000 | -0.940655000 | 6  | 2.299811000  | 2.861241000  | -0.527481000 |
| 6  | -0.419443000 | 1.583784000  | -0.948275000 | 6  | 2.136338000  | 1.829504000  | 0.585372000  |
| 6  | 1.574149000  | -0.419122000 | -0.937801000 | 6  | -2.038360000 | -0.437755000 | 1.074969000  |
| 6  | 2.744997000  | 0.125875000  | -1.481324000 | 6  | -3.550298000 | -0.469253000 | 1.274978000  |
| 6  | 3.979766000  | -0.118341000 | -0.912046000 | 6  | -4.219093000 | -1.274971000 | 0.168457000  |
| 6  | 4.077229000  | -0.939027000 | 0.214652000  | 6  | -3.865327000 | -0.179658000 | -1.199658000 |
| 6  | 2.928436000  | -1.499884000 | 0.764909000  | 6  | -2.353464000 | -0.658768000 | -1.396080000 |
| 6  | 1.689932000  | -1.230479000 | 0.186542000  | 6  | 1.265972000  | -1.584556000 | 1.162790000  |
| 6  | -1.467615000 | 2.327100000  | -1.506704000 | 6  | 1.736506000  | -3.029123000 | -3.02638000  |
| 6  | -1.880281000 | 3.518472000  | -0.942218000 | 6  | 2.889691000  | -3.315785000 | 0.350392000  |
| 6  | -1.234902000 | 4.010645000  | 0.195127000  | 6  | 2.475038000  | -3.025846000 | -3.058919000 |
| 6  | -0.181191000 | 3.296294000  | 0.758066000  | 6  | 1.983474000  | -1.591921000 | -1.233187000 |
| 6  | 0.211552000  | 2.089098000  | 0.184268000  | 1  | -2.101881000 | 1.169811000  | -0.341552000 |
| 6  | -1.919435000 | -0.840227000 | 0.180606000  | 1  | 0.607967000  | 0.801545000  | 1.694801000  |

|    |              |              |              |    |              |              |              |
|----|--------------|--------------|--------------|----|--------------|--------------|--------------|
| 1  | 0.013853000  | -1.992809000 | -0.518265000 | 6  | 1.719066000  | -0.082641000 | -0.046300000 |
| 1  | -1.228889000 | 2.392534000  | 1.174378000  | 6  | -2.120456000 | 1.670332000  | -0.418987000 |
| 1  | 0.166803000  | 3.144869000  | 1.927736000  | 6  | -2.774585000 | 2.808609000  | 0.356000000  |
| 1  | -0.400131000 | 3.207422000  | -1.068503000 | 6  | -1.953552000 | 4.084494000  | 0.237999000  |
| 1  | -0.675218000 | 4.534066000  | 0.053602000  | 6  | -0.535943000 | 3.839933000  | 0.734308000  |
| 1  | 1.524176000  | 4.795472000  | -1.104107000 | 6  | 0.128320000  | 2.704555000  | -0.037490000 |
| 1  | 1.730766000  | 4.579187000  | 0.630696000  | 6  | -1.995509000 | -1.817374000 | -1.303003000 |
| 1  | 2.033007000  | 2.407357000  | -1.486954000 | 6  | -2.522919000 | -3.202023000 | -0.939169000 |
| 1  | 3.346948000  | 3.162972000  | -0.598096000 | 6  | -2.918918000 | -3.265354000 | 0.531360000  |
| 1  | 2.500544000  | 2.263763000  | 1.524101000  | 6  | -1.744706000 | -2.888226000 | 1.427094000  |
| 1  | 2.757371000  | 0.952677000  | 0.378301000  | 6  | -1.223452000 | -1.501858000 | 1.065679000  |
| 1  | -1.655002000 | -1.464725000 | 1.118426000  | 6  | 2.785151000  | 0.657261000  | -0.864611000 |
| 1  | -1.554973000 | 0.122822000  | 1.879826000  | 6  | 4.126154000  | 0.687202000  | -0.143970000 |
| 1  | -3.795779000 | -0.885021000 | 2.254596000  | 6  | 4.605440000  | -0.731880000 | 0.128238000  |
| 1  | -3.933054000 | 0.557891000  | 1.254228000  | 6  | 3.557364000  | -1.501760000 | 0.919787000  |
| 1  | -3.868625000 | -2.312180000 | 0.224204000  | 6  | 2.205446000  | -1.508997000 | 0.210899000  |
| 1  | -5.302057000 | -1.293769000 | 0.306741000  | 1  | -0.071010000 | -2.250401000 | -0.567925000 |
| 1  | -4.331806000 | -1.293971000 | -1.992584000 | 1  | -0.710921000 | 1.104599000  | 1.105144000  |
| 1  | -4.263064000 | 0.312780000  | -1.276288000 | 1  | 1.612657000  | 0.415429000  | 0.928499000  |
| 1  | -2.105677000 | -0.235408000 | -2.373169000 | 1  | -2.097671000 | 1.925023000  | -1.486587000 |
| 1  | -1.961052000 | -1.682976000 | -1.380297000 | 1  | -2.719288000 | 0.763634000  | -0.319595000 |
| 1  | 2.096681000  | -0.919489000 | 1.426135000  | 1  | -3.793511000 | 2.968301000  | -0.002702000 |
| 1  | 0.458330000  | 1.380334000  | 1.867890000  | 1  | -2.845089000 | 2.525553000  | 1.412635000  |
| 1  | 2.031806000  | -3.229203000 | 2.334958000  | 1  | -1.917790000 | 4.391455000  | -0.813680000 |
| 1  | 0.902308000  | -3.701055000 | 1.069066000  | 1  | -2.421890000 | 4.897985000  | 0.795696000  |
| 1  | 3.737008000  | -2.672362000 | 0.614637000  | 1  | 0.065383000  | 4.747733000  | 0.651943000  |
| 1  | 3.226472000  | -4.349444000 | 0.452728000  | 1  | -0.572099000 | 3.572902000  | 1.796672000  |
| 1  | 3.302787000  | -3.216403000 | -1.772686000 | 1  | 1.136680000  | 2.543472000  | 0.349057000  |
| 1  | 1.661863000  | -3.707146000 | -1.364721000 | 1  | 0.228270000  | 2.991216000  | -1.092841000 |
| 1  | 1.669828000  | -1.399390000 | -2.262157000 | 1  | -2.802042000 | -1.087801000 | -1.181425000 |
| 1  | 2.808220200  | -0.899826000 | -1.018182000 | 1  | -1.690659000 | -1.785896000 | -2.352214000 |
|    |              | PCy3_2_H2O   |              | 1  | -3.370771000 | -3.464688000 | -1.575380000 |
| 15 | 0.023606000  | -0.129162000 | -1.046490000 | 1  | -1.735261000 | -3.940532000 | -1.128202000 |
| 6  | -0.257727000 | 1.545613000  | -0.296909000 | 1  | -3.739621000 | -2.560610000 | 0.709373000  |
| 6  | 1.414903000  | -0.829549000 | -0.066347000 | 1  | -3.290070000 | -4.260587000 | 0.784350000  |
| 6  | -1.436474000 | -1.089565000 | -0.464361000 | 1  | -2.037781000 | -2.982660000 | 2.478509000  |
| 6  | 2.722828000  | -0.195904000 | -0.547496000 | 1  | -0.937137000 | -3.617441000 | 1.289815000  |
| 6  | 3.917905000  | -0.739599000 | 0.225195000  | 1  | -0.385110000 | -1.219040000 | 1.710048000  |
| 6  | 3.997218000  | -2.253365000 | 0.075780000  | 1  | -2.019398000 | -0.767309000 | 1.236973000  |
| 6  | 2.702367000  | -2.903713000 | 0.544327000  | 1  | 2.901474000  | 0.126666000  | -1.818175000 |
| 6  | 1.496277000  | -2.349111000 | -0.207632000 | 1  | 2.453751000  | 1.668191000  | -1.112064000 |
| 6  | 0.236935000  | 2.649085000  | -1.237404000 | 1  | 4.862030000  | 1.236923000  | -0.734533000 |
| 6  | -0.144427000 | 4.031303000  | -0.720220000 | 1  | 4.010612000  | 1.219993000  | 0.807145000  |
| 6  | 0.390495000  | 4.252766000  | 0.688157000  | 1  | 4.775015000  | -1.238034000 | -0.829002000 |
| 6  | -0.109467000 | 3.160271000  | 1.623821000  | 1  | 5.557947000  | -0.724583000 | 0.662007000  |
| 6  | 0.294485000  | 1.781860000  | 1.109711000  | 1  | 3.888128000  | -2.527029000 | 1.098990000  |
| 6  | -2.696903000 | -0.663180000 | -1.219916000 | 1  | 3.434206000  | -1.028190000 | 1.900600000  |
| 6  | -3.873335000 | -1.566565000 | -0.864654000 | 1  | 1.487176000  | -2.066318000 | 0.815330000  |
| 6  | -4.123833000 | -1.566654000 | 0.638099000  | 1  | 2.297215000  | -2.034972000 | -0.748142000 |
| 6  | -2.868780000 | -1.988106000 | 1.392018000  |    |              | PBu3_1_H2O   |              |
| 6  | -1.699529000 | -1.074375000 | 1.038355000  | 15 | 0.000485000  | -0.002081000 | -0.670930000 |
| 1  | -1.352456000 | 1.635640000  | -0.239981000 | 6  | 0.931336000  | -1.321201000 | 0.193823000  |
| 1  | 1.284841000  | -0.597683000 | 0.997424000  | 6  | -1.608430000 | -0.146667000 | 0.192011000  |
| 1  | -1.223110000 | -2.124107000 | -0.765962000 | 6  | 0.678121000  | 1.464337000  | 0.192126000  |
| 1  | 2.847304000  | -0.430095000 | -1.612529000 | 6  | -2.445266000 | -1.330637000 | -0.276362000 |
| 1  | 2.672680000  | 0.893566000  | -0.468388000 | 6  | -3.775981000 | -1.428267000 | 0.456931000  |
| 1  | 4.839952000  | -0.269125000 | -0.122407000 | 6  | -4.607939000 | -2.608424000 | -0.019255000 |
| 1  | 3.805014000  | -0.486675000 | 1.285776000  | 6  | 2.375910000  | -1.450597000 | -0.273190000 |
| 1  | 4.158770000  | -2.497168000 | -0.980593000 | 6  | 3.127317000  | -2.554208000 | 0.458570000  |
| 1  | 4.848029000  | -2.652255000 | 0.631844000  | 6  | 4.566534000  | -2.679426000 | -0.015460000 |
| 1  | 2.751605000  | -3.988119000 | 0.425291000  | 6  | 0.066896000  | 2.780045000  | -0.273526000 |
| 1  | 2.571145000  | -2.703429000 | 1.613920000  | 6  | 0.651599000  | 3.982533000  | 0.454684000  |
| 1  | 0.583850000  | -2.817099000 | 0.168752000  | 6  | 0.040209000  | 5.292014000  | -0.017730000 |
| 1  | 1.576252000  | -2.605438000 | -1.272403000 | 1  | 0.894551000  | -1.124572000 | 1.272720000  |
| 1  | 1.329067000  | 2.579760000  | -1.320996000 | 1  | 0.407979000  | -2.266541000 | 0.020351000  |
| 1  | -0.167363000 | 2.491008000  | -2.240329000 | 1  | -1.420896000 | -0.213927000 | 1.271071000  |
| 1  | 0.222813000  | 4.804213000  | -1.398779000 | 1  | -2.163114000 | 0.780671000  | 0.018469000  |
| 1  | -1.237658000 | 4.110552000  | -0.701805000 | 1  | 0.528498000  | 1.334064000  | 1.271329000  |
| 1  | 1.486123000  | 4.225346000  | 0.663176000  | 1  | 1.758126000  | 1.484101000  | 0.016447000  |
| 1  | 0.101597000  | 5.238769000  | 1.057830000  | 1  | -2.631181000 | -1.244731000 | -1.352337000 |
| 1  | 0.277543000  | 3.312448000  | 2.633746000  | 1  | -1.890574000 | -2.264011000 | -0.132720000 |
| 1  | -1.202856000 | 3.212483000  | 1.685226000  | 1  | -3.585827000 | -1.513364000 | 1.530943000  |
| 1  | -0.045267000 | 1.006349000  | 1.798134000  | 1  | -4.330556000 | -0.496124000 | 0.313262000  |
| 1  | 1.388964000  | 1.726446000  | 1.082225000  | 1  | -4.071929000 | -3.547093000 | 0.137080000  |
| 1  | -2.948907000 | 0.369639000  | -0.950542000 | 1  | -5.559602000 | -2.674471000 | 0.509135000  |
| 1  | -2.512373000 | -0.677782000 | -2.297479000 | 1  | -4.822152000 | -2.524351000 | -1.086890000 |
| 1  | -4.769165000 | -1.250337000 | -1.403184000 | 1  | 2.396152000  | -1.623355000 | -1.349568000 |
| 1  | -3.645041000 | -2.588285000 | -1.188623000 | 1  | 2.904774000  | -0.502743000 | -0.127011000 |
| 1  | -4.403605000 | -0.554504000 | 0.952801000  | 1  | 3.103527000  | -2.350046000 | 1.533118000  |
| 1  | -4.960318000 | -2.223056000 | 0.886493000  | 1  | 2.600206000  | -2.674471000 | 0.311329000  |
| 1  | -3.046607000 | -1.978107000 | 2.469527000  | 1  | 5.109012000  | -1.745342000 | 0.145864000  |
| 1  | -2.612149000 | -3.017530000 | 1.116021000  | 1  | 5.100264000  | -3.471744000 | 0.510449000  |
| 1  | -0.801243000 | -1.365631000 | 1.590417000  | 1  | 4.603252000  | -2.902294000 | -1.084008000 |
| 1  | -1.949158000 | -0.049636000 | 1.339616000  | 1  | 0.226986000  | 2.897329000  | -1.350707000 |
|    |              | PCy3_3_H2O   |              | 1  | -1.017698000 | 2.765427000  | -0.122366000 |
| 15 | 0.093105000  | 0.062372000  | -0.934209000 | 1  | 0.491006000  | 3.860887000  | 1.530007000  |
| 6  | -0.810830000 | -1.455363000 | -0.403154000 | 1  | 1.734984000  | 3.998094000  | 0.302742000  |
| 6  | -0.689022000 | 1.414265000  | 0.051460000  | 1  | 0.211498000  | 5.434890000  | -1.086862000 |

|    |              |              |              |    |              |              |              |
|----|--------------|--------------|--------------|----|--------------|--------------|--------------|
| 1  | -1.039404000 | 5.296045000  | 0.147338000  | 6  | -4.188438000 | 0.700226000  | -0.641076000 |
| 1  | 0.462215000  | 6.150081000  | 0.506533000  | 6  | -2.174593000 | 3.150046000  | 1.129774000  |
|    |              | PBu3_2_H2O   |              | 6  | -1.070835000 | 2.385473000  | 1.862897000  |
| 15 | -0.158642000 | -0.122393000 | -0.096939000 | 6  | 0.287526000  | 2.427045000  | 1.175793000  |
| 6  | 0.772425000  | -1.549700000 | -0.781876000 | 6  | -0.502362000 | 1.063379000  | -2.703697000 |
| 6  | 0.571157000  | 1.221995000  | -1.110750000 | 6  | 0.375779000  | -0.008491000 | -2.068807000 |
| 6  | -1.739852000 | -0.336791000 | -1.002689000 | 6  | 1.849252000  | 0.185839000  | -2.391022000 |
| 6  | -0.264613000 | 2.502975000  | -1.113571000 | 6  | -4.598432000 | -0.701718000 | -1.101277000 |
| 6  | -0.641392000 | 3.000353000  | 0.279604000  | 6  | -3.787706000 | -1.829372000 | -0.467547000 |
| 6  | 0.570703000  | 3.210632000  | 1.174937000  | 6  | -3.810474000 | -1.810597000 | 1.054500000  |
| 6  | 2.288631000  | -1.406254000 | -0.661120000 | 6  | 2.743687000  | -0.807472000 | -1.665644000 |
| 6  | 2.771847000  | -1.089028000 | 0.748026000  | 6  | 4.222452000  | -0.468982000 | -1.759086000 |
| 6  | 4.288727000  | -1.123699000 | 0.843750000  | 6  | 5.109433000  | -1.496930000 | -1.071665000 |
| 6  | -2.448038000 | -1.656145000 | -0.694163000 | 6  | 6.561239000  | -1.050782000 | -1.004757000 |
| 6  | -2.662379000 | -1.910941000 | 0.795566000  | 6  | -3.204151000 | -3.076493000 | 1.676191000  |
| 6  | -3.400496000 | -0.773722000 | 1.486142000  | 6  | -1.787767000 | -3.379504000 | 1.199879000  |
| 1  | 0.443157000  | -2.445073000 | -0.244608000 | 6  | -0.784635000 | -2.262615000 | 1.457458000  |
| 1  | 0.488070000  | -1.677517000 | -1.832914000 | 6  | 0.613193000  | -2.645704000 | -0.995239000 |
| 1  | 1.572356000  | 1.425714000  | -0.718871000 | 6  | 1.290933000  | 1.485145000  | 1.825530000  |
| 1  | 0.696482000  | 0.855012000  | -2.135913000 | 6  | 2.877982000  | 1.585575000  | 1.205047000  |
| 1  | -2.386390000 | 0.506985000  | -0.743213000 | 6  | 3.673564000  | 0.565723000  | 1.747828000  |
| 1  | -1.533603000 | -0.265106000 | -2.076884000 | 6  | 3.973414000  | 0.755316000  | 3.228494000  |
| 1  | 0.297425000  | 3.287366000  | -1.629765000 | 1  | -2.585811000 | -2.043352000 | -2.967938000 |
| 1  | -1.174949000 | 2.337885000  | -1.695829000 | 1  | -2.316317000 | -0.097724000 | -2.780074000 |
| 1  | -1.195108000 | 3.936886000  | 0.181935000  | 1  | -1.439964000 | 3.154027000  | -0.903071000 |
| 1  | -1.325640000 | 2.284403000  | 0.750452000  | 1  | -3.187636000 | 3.256481000  | -0.791552000 |
| 1  | 0.290633000  | 3.661118000  | 2.127678000  | 1  | -4.525491000 | 0.875421000  | 0.386110000  |
| 1  | 1.071850000  | 2.263466000  | 1.391042000  | 1  | -4.670123000 | 1.457527000  | -1.268595000 |
| 1  | 1.297850000  | 3.868107000  | 0.691489000  | 1  | -1.987120000 | 4.225061000  | 1.208471000  |
| 1  | 2.762177000  | -2.334453000 | -0.996245000 | 1  | -3.126148000 | 2.964167000  | 1.636517000  |
| 1  | 2.639221000  | -0.621969000 | -1.339607000 | 1  | -0.970993000 | 2.781871000  | 2.877572000  |
| 1  | 2.406556000  | -0.099662000 | 1.045702000  | 1  | -1.369631000 | 1.336140000  | 1.970620000  |
| 1  | 2.331044000  | -1.803338000 | 1.450887000  | 1  | 0.188336000  | 2.141595000  | 0.121030000  |
| 1  | 4.734123000  | -0.408212000 | 0.148782000  | 1  | 0.675995000  | 3.452174000  | 1.182407000  |
| 1  | 4.639152000  | -0.878548000 | 1.846793000  | 1  | -0.332259000 | 1.066063000  | -3.784724000 |
| 1  | 4.669502000  | -2.114509000 | 0.586614000  | 1  | -0.169909000 | 2.043352000  | -2.340898000 |
| 1  | -3.419924000 | -1.657654000 | -1.197208000 | 1  | 0.256573000  | 0.010405000  | -0.977542000 |
| 1  | -1.874092000 | -2.482316000 | -1.122784000 | 1  | 0.043098000  | -1.002534000 | -2.394687000 |
| 1  | -3.221474000 | -2.841519000 | 0.916648000  | 1  | 2.011486000  | 0.117218000  | -3.472022000 |
| 1  | -1.693629000 | -2.066640000 | 1.282404000  | 1  | 2.137790000  | 1.204291000  | -2.100392000 |
| 1  | -2.798992000 | 0.138999000  | 1.497201000  | 1  | -5.658585000 | -0.851393000 | -0.875725000 |
| 1  | -4.335694000 | -0.548371000 | 0.967041000  | 1  | -4.500960000 | -0.761834000 | -2.188465000 |
| 1  | -3.640789000 | -1.023221000 | 2.520122000  | 1  | -4.171824000 | -2.792291000 | -0.820801000 |
|    |              | PBu3_3_H2O   |              | 1  | -2.749060000 | -1.766508000 | -0.816990000 |
| 15 | -0.285449000 | 0.284894000  | 0.325086000  | 1  | -3.276897000 | -0.923501000 | -1.413869000 |
| 6  | -1.705386000 | 0.245960000  | -0.839953000 | 1  | -4.846214000 | -1.703911000 | 1.394609000  |
| 6  | 0.390896000  | -1.388955000 | 0.020441000  | 1  | 2.459127000  | -0.829334000 | -0.606555000 |
| 6  | 0.880407000  | 1.279880000  | -0.688492000 | 1  | 2.565831000  | -1.818183000 | -2.051379000 |
| 6  | -0.586431000 | -2.488556000 | 0.427180000  | 1  | 4.520406000  | -0.372244000 | -2.809274000 |
| 6  | 0.052542000  | -3.873583000 | 0.458627000  | 1  | 4.387781000  | 0.514373000  | -1.299688000 |
| 6  | 0.609542000  | -4.296647000 | -0.893011000 | 1  | 4.729482000  | -1.673505000 | -0.059752000 |
| 6  | -2.232489000 | 1.631678000  | -1.214666000 | 1  | 5.031651000  | -2.451091000 | -1.601096000 |
| 6  | -2.574771000 | 2.514981000  | -0.018039000 | 1  | 6.649337000  | -0.122470000 | -0.434272000 |
| 6  | -3.582558000 | 1.869503000  | 0.921027000  | 1  | 7.197753000  | -0.797958000 | -1.529462000 |
| 6  | 2.346171000  | 1.111567000  | -0.295485000 | 1  | 6.955829000  | -0.861490000 | -2.005615000 |
| 6  | 2.628319000  | 1.392136000  | 1.174128000  | 1  | -3.198364000 | -2.963805000 | 2.765659000  |
| 6  | 4.117853000  | 1.365439000  | 1.477180000  | 1  | -3.850122000 | -3.920540000 | -1.446111000 |
| 1  | -1.386848000 | -0.287003000 | -1.743663000 | 1  | -1.436355000 | -4.289151000 | 1.697433000  |
| 1  | -2.500358000 | -0.347491000 | -0.380597000 | 1  | -1.797326000 | -3.604939000 | 0.127804000  |
| 1  | 0.656572000  | -1.472933000 | -1.039788000 | 1  | -1.101557000 | -1.352339000 | 0.936984000  |
| 1  | 1.316630000  | -1.490478000 | 0.598320000  | 1  | -0.777283000 | -2.022286000 | 2.526490000  |
| 1  | 0.738336000  | 1.002031000  | -1.739432000 | 1  | 0.946571000  | -3.565132000 | 1.482524000  |
| 1  | 0.591187000  | 2.331106000  | -0.589281000 | 1  | 0.626743000  | -2.819031000 | -0.085000000 |
| 1  | -1.001469000 | -2.256411000 | 1.413708000  | 1  | 1.345004000  | -1.865476000 | 1.215527000  |
| 1  | -1.429835000 | -2.499932000 | -0.270680000 | 1  | 1.339327000  | 1.689468000  | 2.899969000  |
| 1  | 0.853295000  | -3.879184000 | 1.204322000  | 1  | 0.921726000  | 0.453737000  | 1.720007000  |
| 1  | -0.691025000 | -4.601701000 | 0.791434000  | 1  | 2.583222000  | 1.460911000  | 0.120071000  |
| 1  | 1.441145000  | -3.659595000 | -1.198307000 | 1  | 3.071490000  | 2.595688000  | 1.368151000  |
| 1  | 0.972417000  | -5.324804000 | -0.870160000 | 1  | 3.279349000  | -0.442937000 | 1.578993000  |
| 1  | -0.161213000 | -4.228870000 | -1.665061000 | 1  | 4.605263000  | 0.631626000  | 1.176582000  |
| 1  | -1.493703000 | 2.140964000  | -1.838937000 | 1  | 4.319049000  | 1.773650000  | 3.423221000  |
| 1  | -3.128807000 | 1.509009000  | -1.830555000 | 1  | 3.087606000  | 0.583133000  | 3.841634000  |
| 1  | -1.659286000 | 2.753454000  | 0.534427000  | 1  | 4.748415000  | 0.067776000  | 3.569283000  |
| 1  | -2.969078000 | 3.465366000  | -0.384842000 |    |              | POct3_2_H2O  |              |
| 1  | -4.474147000 | 1.554665000  | 0.372709000  | 15 | -1.560797000 | -1.553524000 | 0.442455000  |
| 1  | -3.161837000 | 0.986080000  | 1.406272000  | 6  | -1.036967000 | -2.855267000 | -0.744704000 |
| 1  | -3.895912000 | 2.559075000  | 1.705540000  | 6  | -3.380556000 | -1.765924000 | 0.407771000  |
| 1  | 2.678032000  | 0.095714000  | -0.533316000 | 6  | -1.207218000 | -2.375623000 | 2.045043000  |
| 1  | 2.957033000  | 1.783388000  | -0.906794000 | 6  | -4.108255000 | -0.684957000 | 1.211257000  |
| 1  | 2.204303000  | 2.365073000  | 1.442796000  | 6  | -3.790632000 | 0.744128000  | 0.769277000  |
| 1  | 2.112620000  | 0.650596000  | 1.792580000  | 6  | -4.017144000 | 0.986094000  | -0.717757000 |
| 1  | 4.644231000  | 2.125055000  | 0.895163000  | 6  | 0.345824000  | -2.621979000 | -1.358191000 |
| 1  | 4.322178000  | 1.549105000  | 2.532423000  | 6  | 0.435831000  | -1.297564000 | -2.111071000 |
| 1  | 4.545755000  | 0.394708000  | 1.216814000  | 6  | 1.626987000  | -1.215480000 | -3.061427000 |
|    |              | POct3_1_H2O  |              | 6  | 0.286076000  | -2.548307000 | -2.323591000 |
| 15 | -2.376038000 | 0.968416000  | -0.637404000 | 6  | 1.085977000  | -1.259830000 | 2.159952000  |
| 6  | -1.995936000 | 0.888337000  | -2.426510000 | 6  | 0.578404000  | -0.120231000 | 3.032875000  |
| 6  | -2.306079000 | 2.779709000  | -0.351046000 | 6  | 2.978879000  | -1.408880000 | -2.377887000 |

|    |              |              |              |    |              |              |              |
|----|--------------|--------------|--------------|----|--------------|--------------|--------------|
| 6  | 3.202738000  | -0.430846000 | -1.235469000 | 1  | 1.507247000  | -2.623540000 | 2.240138000  |
| 6  | 4.601300000  | -0.478625000 | -0.641539000 | 1  | -0.119494000 | -1.978835000 | 2.181698000  |
| 6  | 4.735446000  | 0.470503000  | 0.540381000  | 1  | 2.195584000  | -4.096323000 | 0.332665000  |
| 6  | 1.429676000  | 1.138911000  | 2.926629000  | 1  | 2.351351000  | -3.471312000 | -1.311053000 |
| 6  | 1.357148000  | 1.821089000  | 1.566036000  | 1  | -0.429400000 | -3.956541000 | -1.033377000 |
| 6  | 2.179504000  | 3.102083000  | 1.530219000  | 1  | -0.170594000 | -4.265147000 | 0.682407000  |
| 6  | 2.216301000  | 3.742099000  | 0.151939000  | 1  | 3.571362000  | -2.269088000 | 1.225008000  |
| 6  | -3.751362000 | 2.437734000  | -1.150340000 | 1  | 4.442657000  | -3.103757000 | -0.042126000 |
| 6  | -2.533193000 | 2.573187000  | -2.059559000 | 1  | 3.830255000  | -1.294816000 | -1.655980000 |
| 6  | -1.227767000 | 2.204741000  | -1.368265000 | 1  | 2.956136000  | -0.457598000 | -0.386887000 |
| 6  | -0.039517000 | 2.237681000  | -2.317623000 | 1  | 5.038100000  | -0.278405000 | 0.960368000  |
| 1  | -1.778322000 | -2.849473000 | -1.551137000 | 1  | 5.938548000  | -1.094770000 | -0.306462000 |
| 1  | -1.095245000 | -3.835860000 | -0.259880000 | 1  | 1.334000000  | -0.347812000 | 3.259298000  |
| 1  | -3.690546000 | -1.727162000 | -0.639675000 | 1  | 2.463204000  | -0.365622000 | 1.918355000  |
| 1  | -3.643762000 | -2.761353000 | 0.780932000  | 1  | 1.050119000  | 1.643713000  | 1.858616000  |
| 1  | -1.674474000 | -1.769964000 | 2.827564000  | 1  | 0.804118000  | 0.660582000  | 0.428200000  |
| 1  | -1.707515000 | -3.350065000 | 2.050526000  | 1  | -1.298773000 | -0.278315000 | 1.485238000  |
| 1  | -5.186710000 | -0.849466000 | 1.123379000  | 1  | -1.039600000 | 0.791054000  | 2.854425000  |
| 1  | -3.863460000 | -0.795461000 | 2.272072000  | 1  | -2.564716000 | -3.861171000 | 0.240839000  |
| 1  | -4.415293000 | 1.437770000  | 1.339867000  | 1  | -1.927441000 | -2.600752000 | 1.271009000  |
| 1  | -2.750991000 | 0.994187000  | 1.015198000  | 1  | -1.739330000 | -1.072244000 | -0.690707000 |
| 1  | -3.362566000 | 0.323301000  | -1.296437000 | 1  | -2.372087000 | -2.332438000 | -1.734887000 |
| 1  | -5.041310000 | 0.690056000  | -0.965706000 | 1  | -4.493558000 | -2.355319000 | -0.421370000 |
| 1  | 1.116114000  | -2.655369000 | -0.579802000 | 1  | -3.823446000 | -1.176634000 | 0.692836000  |
| 1  | 0.570788000  | -3.441250000 | -2.050042000 | 1  | -1.043287000 | 2.740098000  | 1.175655000  |
| 1  | -0.491025000 | -1.147191000 | -2.679299000 | 1  | -1.529535000 | 1.584402000  | -0.053113000 |
| 1  | 0.478392000  | -0.473985000 | -1.390614000 | 1  | -3.578000000 | 1.039803000  | 1.308502000  |
| 1  | 1.507020000  | -1.966336000 | -3.848489000 | 1  | -3.075416000 | 2.255558000  | 2.502780000  |
| 1  | 1.620479000  | -0.237025000 | -3.554132000 | 1  | -3.133282000 | 3.996592000  | 0.707069000  |
| 1  | 0.418021000  | -2.932223000 | 3.339836000  | 1  | -3.729074000 | 2.795102000  | -0.420438000 |
| 1  | 0.687667000  | -3.309144000 | 1.647185000  | 1  | -5.641505000 | 4.099254000  | 0.500926000  |
| 1  | 2.140648000  | -1.447716000 | 2.390816000  | 1  | -5.747226000 | 2.435396000  | 1.077465000  |
| 1  | 1.047376000  | -0.954756000 | 1.109067000  | 1  | -5.143786000 | 3.699736000  | 2.146438000  |
| 1  | -0.451961000 | 0.128239000  | 2.750210000  | 1  | -3.638489000 | 0.484204000  | -1.161173000 |
| 1  | 0.542625000  | -0.462017000 | 4.072792000  | 1  | -4.309479000 | -0.694114000 | -2.279765000 |
| 1  | 3.061748000  | -2.431801000 | -1.994601000 | 1  | -6.407976000 | -0.781220000 | -0.927516000 |
| 1  | 3.776122000  | -1.291367000 | -3.118406000 | 1  | -5.708958000 | 0.340001000  | 0.227738000  |
| 1  | 2.988253000  | 0.591213000  | -1.578533000 | 1  | -7.218951000 | 1.564437000  | -1.216238000 |
| 1  | 2.484121000  | -0.639030000 | -0.437122000 | 1  | -5.584764000 | 2.087710000  | -1.568210000 |
| 1  | 4.822618000  | -1.502851000 | -0.325366000 | 1  | -6.947103000 | 1.712417000  | 3.659911000  |
| 1  | 5.335221000  | -0.225741000 | -1.412505000 | 1  | -5.535480000 | 0.662112000  | -3.614528000 |
| 1  | 5.738753000  | 0.457026000  | 0.967796000  | 1  | -7.125715000 | 0.013579000  | -3.215877000 |
| 1  | 4.512387000  | 1.496694000  | 0.234807000  | 1  | 5.349099000  | 0.743909000  | -1.900549000 |
| 1  | 4.027641000  | 0.202401000  | 1.331263000  | 1  | 4.457659000  | 1.556877000  | -0.626630000 |
| 1  | 1.116860000  | 1.859376000  | 3.689058000  | 1  | 6.556157000  | 1.743331000  | 0.720345000  |
| 1  | 2.475766000  | 0.890776000  | 3.145248000  | 1  | 7.446233000  | 0.933116000  | -0.555885000 |
| 1  | 1.714581000  | 1.147549000  | 0.776979000  | 1  | 6.850993000  | 2.771681000  | -2.135287000 |
| 1  | 0.308887000  | 2.043913000  | 1.326653000  | 1  | 5.965441000  | 3.581617000  | -0.858393000 |
| 1  | 1.774549000  | 3.807867000  | 2.261792000  | 1  | 8.262743000  | 4.558743000  | -1.086037000 |
| 1  | 3.199527000  | 2.872006000  | 1.857149000  | 1  | 8.078496000  | 3.780840000  | 0.486869000  |
| 1  | 2.798816000  | 4.664305000  | 0.148537000  | 1  | 8.968675000  | 2.967445000  | -0.798557000 |
| 1  | 2.662736000  | 3.059443000  | -0.577056000 |    |              |              |              |
| 1  | 1.207213000  | 3.979905000  | -0.194786000 |    |              |              |              |
| 1  | -4.626503000 | 2.843929000  | -1.661075000 |    |              |              |              |
| 1  | -3.599043000 | 3.059219000  | -0.260205000 |    |              |              |              |
| 1  | -2.667805000 | 1.923472000  | -2.932708000 |    |              |              |              |
| 1  | -2.459698000 | 3.596747000  | -2.440603000 | 15 | 0.000184000  | PMe3H        | 0.000411000  |
| 1  | -1.062124000 | 2.891247000  | -0.530081000 | 6  | -1.360097000 | 0.988221000  | -0.215965000 |
| 1  | -1.313995000 | 1.203401000  | -0.932554000 | 6  | -0.176640000 | -1.671446000 | -0.215878000 |
| 1  | 0.881278000  | 1.912980000  | -1.826828000 | 6  | 1.536487000  | 0.682674000  | -0.216165000 |
| 1  | -0.213046000 | 1.572802000  | -3.168474000 | 1  | -1.246127000 | 2.006589000  | 0.151440000  |
| 1  | 0.124419000  | 3.244648000  | -2.709455000 | 1  | -1.359492000 | 0.988531000  | -1.305742000 |
| 15 | 0.792347000  | PcOct3_3_H2O | -2.160503000 | 1  | -2.293208000 | 0.563851000  | 0.150663000  |
| 6  | 0.888913000  | -1.842967000 | 1.783533000  | 1  | 0.656687000  | -2.268111000 | 0.151163000  |
| 6  | 2.303597000  | -3.179544000 | -0.257559000 | 1  | -1.116021000 | -2.080439000 | 0.152153000  |
| 6  | -0.464825000 | -3.496158000 | -0.040591000 | 1  | -0.177335000 | -1.671610000 | -1.305576000 |
| 6  | 3.584015000  | -2.451509000 | 0.144734000  | 1  | 2.360284000  | 0.073726000  | 0.152378000  |
| 6  | 3.804719000  | -1.127382000 | -0.573163000 | 1  | 1.536755000  | 0.681086000  | -1.305893000 |
| 6  | 5.081981000  | -0.435791000 | -0.124470000 | 1  | 1.636746000  | 1.703008000  | 0.149786000  |
| 6  | 1.401847000  | -0.453560000 | 2.171842000  | 1  | 0.000443000  | 0.000507000  | 1.728447000  |
| 6  | 0.638392000  | 0.691473000  | 1.510826000  |    |              | PPhMe2H_1    |              |
| 6  | -0.861671000 | 0.684381000  | 1.777732000  | 15 | 1.563616000  | -0.114953000 | -0.346283000 |
| 6  | -1.881366000 | -3.006312000 | 0.253967000  | 6  | 2.234073000  | -1.343778000 | 0.742954000  |
| 6  | -2.399789000 | -1.947234000 | -0.709214000 | 6  | -0.201810000 | -0.021937000 | -0.158903000 |
| 6  | -3.809181000 | -1.501753000 | -0.355660000 | 6  | -0.952705000 | -1.192190000 | -0.293057000 |
| 6  | -1.578533000 | 1.795411000  | 1.023529000  | 6  | -2.329737000 | -1.143187000 | -1.144248000 |
| 6  | -3.030915000 | 1.982753000  | 1.434898000  | 6  | -2.955070000 | 0.067581000  | 0.139784000  |
| 6  | -3.724388000 | 3.077883000  | 0.637780000  | 6  | -2.207216000 | 1.230663000  | 0.273498000  |
| 6  | -5.144030000 | 3.345550000  | 1.113207000  | 6  | -0.826698000 | 1.191225000  | 0.123303000  |
| 6  | -4.323607000 | -0.371653000 | -1.233913000 | 6  | 2.322579000  | 1.459561000  | -0.061058000 |
| 6  | -5.724243000 | 0.070933000  | -0.834366000 | 1  | 1.747496000  | -2.299860000 | 0.554723000  |
| 6  | -6.270159000 | 1.237905000  | -1.650278000 | 1  | 3.304449000  | -1.433163000 | 0.563129000  |
| 6  | -6.479719000 | 0.889593000  | -3.117665000 | 1  | 2.052273000  | 1.025250000  | -1.770802000 |
| 6  | 5.313371000  | 0.898668000  | -0.816271000 | 1  | -0.462394000 | -2.133014000 | -0.513152000 |
| 6  | 6.590076000  | 1.590174000  | -0.364444000 | 1  | -2.914714000 | -2.046820000 | -0.248372000 |
| 6  | 6.820795000  | 2.927353000  | -1.052569000 | 1  | -4.029969000 | 0.102514000  | 0.257847000  |
| 6  | 8.103413000  | 3.600569000  | -0.590101000 | 1  | -2.696045000 | 2.169546000  | 0.495384000  |

**Protonated Phosphines**

PMe3H

PPhMe2H\_1

|    |              |              |              |    |              |              |              |
|----|--------------|--------------|--------------|----|--------------|--------------|--------------|
| 1  | -0.246107000 | 2.098311000  | 0.228520000  | 6  | 1.767773000  | -0.189377000 | 0.328415000  |
| 1  | 1.940353000  | 2.193310000  | -0.768332000 | 6  | -0.745894000 | 1.351423000  | 0.541966000  |
| 1  | 2.111328000  | 1.776490000  | 0.959648000  | 6  | -0.924618000 | 2.366284000  | 1.477234000  |
| 1  | 3.397717000  | 1.346712000  | -0.193721000 | 6  | -1.566034000 | 3.545671000  | 1.124439000  |
| 1  | 1.840873000  | -0.505340000 | -1.645873000 | 6  | -2.026991000 | 3.706154000  | -0.181847000 |
|    |              | PPhMe2H_2    |              | 6  | -1.849342000 | 2.686648000  | -1.126634000 |
| 15 | 1.551031000  | -0.410103000 | 0.000011000  | 6  | -1.214826000 | 1.518627000  | -0.768182000 |
| 6  | 2.283542000  | 0.301388000  | 1.450098000  | 6  | 2.865649000  | 0.000183000  | 1.162310000  |
| 6  | -0.206266000 | -0.170602000 | -0.000005000 | 6  | 4.154203000  | -0.016491000 | 0.646212000  |
| 6  | -1.062740000 | -1.269580000 | -0.000119000 | 6  | 4.337863000  | -0.221632000 | -0.720752000 |
| 6  | -2.436278000 | -1.063744000 | -0.000135000 | 6  | 3.234797000  | -0.412937000 | -1.563851000 |
| 6  | -2.943969000 | 0.229995000  | -0.000037000 | 6  | 1.960064000  | -0.397981000 | -1.044054000 |
| 6  | -2.085812000 | 1.326285000  | 0.000077000  | 6  | -0.116987000 | -2.755222000 | 0.246905000  |
| 6  | -0.713495000 | 1.130238000  | 0.000093000  | 6  | -0.833502000 | -3.882755000 | -0.090087000 |
| 6  | 2.283577000  | 0.301472000  | -1.450019000 | 6  | -2.229766000 | -3.828662000 | -0.168307000 |
| 1  | 1.851774000  | -0.155492000 | 2.338390000  | 6  | -2.903610000 | -2.635108000 | 0.096407000  |
| 1  | 3.359807000  | 0.136730000  | 1.426747000  | 6  | -2.175432000 | -1.505237000 | 0.434527000  |
| 1  | 2.075565000  | 1.371751000  | 1.445698000  | 8  | 5.548253000  | -0.253391000 | -1.315101000 |
| 1  | -0.657211000 | -2.273621000 | -0.000194000 | 8  | -2.659635000 | 4.813973000  | -0.619700000 |
| 1  | -3.107503000 | -1.911786000 | -0.000223000 | 8  | -2.850190000 | -4.975192000 | -0.510033000 |
| 1  | -4.014410000 | 0.387447000  | -0.000048000 | 6  | 6.697851000  | -0.058412000 | -0.503126000 |
| 1  | -2.486518000 | 2.330809000  | 0.000154000  | 6  | -2.859368000 | 5.877623000  | 0.300929000  |
| 1  | -0.039120000 | 1.979012000  | 0.000180000  | 6  | -4.268348000 | -4.968221000 | -0.602834000 |
| 1  | 1.851824000  | -0.155349000 | -2.338349000 | 1  | -0.564180000 | 2.238397000  | 2.490587000  |
| 1  | 2.075604000  | 1.371836000  | -1.445555000 | 1  | -1.702285000 | 4.321049000  | 1.863517000  |
| 1  | 3.359840000  | 0.136808000  | -1.426657000 | 1  | -2.220895000 | 2.836853000  | -2.131336000 |
| 1  | 1.753530000  | -1.779311000 | -0.000027000 | 1  | -1.083196000 | 0.728353000  | -1.498698000 |
|    |              | PPh2MeH_1    |              | 1  | 2.718499000  | 0.159979000  | 2.223593000  |
| 15 | 1.551031000  | -0.410103000 | 0.000011000  | 1  | 4.996183000  | 0.125774000  | 1.307219000  |
| 6  | 2.283542000  | 0.301388000  | 1.450098000  | 1  | 3.408028000  | -0.573786000 | -2.619400000 |
| 6  | -0.206266000 | -0.170602000 | -0.000005000 | 1  | 1.107771000  | -0.551491000 | -1.696610000 |
| 6  | -1.062740000 | -1.269580000 | -0.000119000 | 1  | 0.963200000  | -2.805055000 | 0.303925000  |
| 6  | -2.436278000 | -1.063744000 | -0.000135000 | 1  | -0.334799000 | -4.818822000 | -0.302418000 |
| 6  | -2.943969000 | 0.229995000  | -0.000037000 | 1  | -3.980354000 | -2.577436000 | 0.038480000  |
| 6  | -2.085812000 | 1.326285000  | 0.000077000  | 1  | -2.701758000 | -0.580844000 | 0.638471000  |
| 6  | -0.713495000 | 1.130238000  | 0.000093000  | 1  | 7.554228000  | -0.112683000 | -1.168133000 |
| 6  | 2.283577000  | 0.301472000  | -1.450019000 | 1  | 6.670484000  | 0.920036000  | -0.021458000 |
| 1  | 1.851774000  | -0.155492000 | 2.338390000  | 1  | 6.774117000  | -0.838966000 | 0.255347000  |
| 1  | 3.359807000  | 0.136730000  | 1.426747000  | 1  | -3.370444000 | 6.663600000  | -0.246413000 |
| 1  | 2.075565000  | 1.371751000  | 1.445698000  | 1  | -3.478421000 | 5.554055000  | 1.138965000  |
| 1  | -0.657211000 | -2.273621000 | -0.000194000 | 1  | -1.904823000 | 6.252485000  | 0.672958000  |
| 1  | -3.107503000 | -1.911786000 | -0.000223000 | 1  | -4.718333000 | -4.714251000 | 0.358019000  |
| 1  | -4.014410000 | 0.387447000  | -0.000048000 | 1  | -4.603342000 | -4.261683000 | -1.363467000 |
| 1  | -2.486518000 | 2.330809000  | 0.000154000  | 1  | -4.560411000 | -5.974462000 | -0.886834000 |
| 1  | -0.039120000 | 1.979012000  | 0.000180000  | 1  | 0.303330000  | -0.031668000 | 2.369250000  |
| 1  | 1.851824000  | -0.155349000 | -2.338349000 |    |              | Pani3H_2     |              |
| 1  | 2.075604000  | 1.371836000  | -1.445555000 | 15 | 0.087704000  | -0.015385000 | 1.019078000  |
| 1  | 3.359840000  | 0.136808000  | -1.426657000 | 6  | -0.790791000 | 1.459539000  | 0.583460000  |
| 1  | 1.753530000  | -1.779311000 | -0.000027000 | 6  | -0.777835000 | -1.441178000 | 0.453535000  |
|    |              | PPh3H_1      |              | 6  | 1.754676000  | 0.087953000  | 0.440647000  |
| 15 | 0.092876000  | -0.018651000 | -0.818379000 | 6  | 2.797893000  | 0.153221000  | 1.269781000  |
| 6  | -0.069798000 | -1.687638000 | -0.226193000 | 6  | 4.109061000  | -0.292617000 | 0.816401000  |
| 6  | 1.552511000  | 0.742696000  | -0.158205000 | 6  | 4.373004000  | 0.135669000  | -0.484641000 |
| 6  | -1.382771000 | 0.900443000  | -0.463739000 | 6  | 3.326799000  | 0.544329000  | -1.321718000 |
| 6  | -1.879101000 | 1.779278000  | -1.426175000 | 6  | 2.028337000  | 0.522878000  | -0.863142000 |
| 6  | -3.003957000 | 2.539298000  | -1.137695000 | 6  | -1.260979000 | -2.379908000 | 1.341447000  |
| 6  | -3.621204000 | 2.421215000  | 0.102458000  | 6  | -1.939499000 | -3.506014000 | 0.894869000  |
| 6  | -3.123105000 | 1.542997000  | 1.060584000  | 6  | -2.130418000 | -3.687511000 | -0.474084000 |
| 6  | -2.002251000 | 0.776097000  | 0.781455000  | 6  | -1.643726000 | -2.744695000 | -1.390112000 |
| 6  | 2.588628000  | 1.092286000  | -1.021669000 | 6  | -0.973485000 | -1.630106000 | -0.939452000 |
| 6  | 3.732534000  | 1.687028000  | -0.504423000 | 6  | -2.147824000 | 1.408640000  | 0.271609000  |
| 6  | 3.831925000  | 1.927098000  | 0.860343000  | 6  | -2.845450000 | 2.566042000  | -0.040962000 |
| 6  | 2.793499000  | 1.575750000  | 1.719965000  | 6  | -2.174720000 | 3.789494000  | -0.039743000 |
| 6  | 1.648818000  | 0.981310000  | 1.214567000  | 6  | -0.811921000 | 3.847556000  | 0.276814000  |
| 6  | 1.028613000  | -2.346846000 | 0.324931000  | 6  | -0.126048000 | 2.693779000  | 0.584209000  |
| 6  | 0.891968000  | -3.661086000 | 0.750970000  | 8  | -2.775611000 | -4.747120000 | -1.003334000 |
| 6  | -0.330897000 | -4.308959000 | 0.624614000  | 8  | 5.611576000  | 0.192329000  | -1.015336000 |
| 6  | -1.425269000 | -3.649811000 | 0.072177000  | 8  | -2.764551000 | 4.964425000  | -0.336673000 |
| 6  | -1.300428000 | -2.336712000 | -0.353508000 | 6  | -3.289063000 | -5.728572000 | -0.113429000 |
| 1  | -1.392216000 | 1.861132000  | -2.390046000 | 6  | 6.705562000  | -0.216643000 | -0.206092000 |
| 1  | -3.399553000 | 3.218406000  | -1.880506000 | 6  | -4.146801000 | 4.955549000  | -0.666614000 |
| 1  | -4.499387000 | 3.013264000  | 0.323515000  | 1  | 2.590077000  | -0.646507000 | 2.279976000  |
| 1  | -3.610945000 | 1.452709000  | 2.021444000  | 1  | 4.906999000  | -0.601786000 | 1.475027000  |
| 1  | -1.613758000 | 0.083358000  | 1.518804000  | 1  | 3.561246000  | 0.877368000  | -2.323782000 |
| 1  | 2.498631000  | 0.901271000  | -2.083764000 | 1  | 1.221755000  | 0.847170000  | -1.510767000 |
| 1  | 4.542227000  | 1.962050000  | -1.166368000 | 1  | -1.109435000 | -2.234349000 | 2.404019000  |
| 1  | 4.723451000  | 2.391755000  | 1.260115000  | 1  | -2.309917000 | -4.225427000 | -1.609897000 |
| 1  | 2.878360000  | 1.766214000  | 2.781092000  | 1  | -1.806774000 | -2.912652000 | -2.446176000 |
| 1  | 0.835525000  | 0.702522000  | 1.875233000  | 1  | -0.598459000 | -0.899725000 | -1.647874000 |
| 1  | 1.980404000  | -1.840185000 | 0.421482000  | 1  | -2.671487000 | 4.608170000  | 0.269123000  |
| 1  | 1.739205000  | -4.175619000 | 1.183178000  | 1  | -3.895699000 | 2.505783000  | -0.284953000 |
| 1  | -0.434050000 | -5.332316000 | 0.960258000  | 1  | -0.314899000 | 4.808181000  | 0.268381000  |
| 1  | -2.375343000 | -4.157446000 | -0.022851000 | 1  | 0.928878000  | 2.744611000  | 0.823897000  |
| 1  | -2.150940000 | -1.818511000 | -0.778912000 | 1  | -3.764178000 | -6.483480000 | -0.732252000 |
| 1  | 0.251551000  | 0.010661000  | -2.196549000 | 1  | -2.485251000 | -6.184272000 | 0.466575000  |
|    |              | Pani3H_1     |              | 1  | -4.026577000 | -5.291741000 | 0.561479000  |
| 15 | 0.132196000  | -0.114360000 | 0.993670000  | 1  | 7.596547000  | -0.100022000 | -0.815229000 |
| 6  | -0.783874000 | -1.551726000 | 0.511923000  | 1  | 6.785836000  | 0.410423000  | 0.683018000  |

|    |              |              |               |    |              |              |              |
|----|--------------|--------------|---------------|----|--------------|--------------|--------------|
| 1  | 6.598848000  | -1.261297000 | 0.089781000   | 1  | -0.000646000 | 0.009103000  | 2.403760000  |
| 1  | -4.329022000 | 4.350550000  | -1.555925000  |    |              | PCy3H_1      |              |
| 1  | -4.740991000 | 4.574290000  | 0.165115000   | 15 | -0.001119000 | 0.292594000  | -0.328258000 |
| 1  | -4.419583000 | 5.987203000  | -0.865949000  | 6  | -1.764305000 | -0.029833000 | -0.213500000 |
| 1  | 0.174579000  | -0.185212000 | 2.394514000   | 6  | 0.506237000  | 1.507720000  | 0.910071000  |
|    |              | Pani3H_3     |               | 6  | 0.975248000  | -1.224157000 | -0.231664000 |
| 15 | 0.008653000  | -0.003203000 | -1.242654000  | 6  | -0.476496000 | 2.680702000  | 0.993101000  |
| 6  | -1.176810000 | -1.200238000 | -0.709449000  | 6  | -0.418963000 | 3.545045000  | -0.260456000 |
| 6  | -0.446416000 | 1.623870000  | -0.722288000  | 6  | 0.996914000  | 4.066906000  | -0.482277000 |
| 6  | 1.637622000  | -0.416650000 | -0.693410000  | 6  | 2.004309000  | 2.925284000  | -0.569198000 |
| 6  | 2.737247000  | 0.249854000  | -1.251905000  | 6  | 1.927742000  | 2.032111000  | 0.663473000  |
| 6  | 4.009394000  | -0.031801000 | -0.808103000  | 6  | -2.131119000 | -0.644919000 | 1.138495000  |
| 6  | 4.203892000  | -0.982079000 | 0.203430000   | 6  | -3.640675000 | -0.838075000 | 1.221358000  |
| 6  | 3.114837000  | -1.648688000 | 0.763297000   | 6  | -4.139528000 | -1.704027000 | 0.071547000  |
| 6  | 1.834700000  | -1.360257000 | 0.309422000   | 6  | -3.756911000 | -0.903690000 | -1.270996000 |
| 6  | -1.542748000 | 2.250336000  | -1.330676000  | 6  | -2.246778000 | -0.908598000 | -1.369895000 |
| 6  | -1.944352000 | 3.496832000  | -0.906691000  | 6  | 1.467712000  | -1.535003000 | 1.184834000  |
| 6  | -1.259395000 | 4.136357000  | 0.135274000   | 6  | 2.220551000  | -2.185056000 | 1.185556000  |
| 6  | -0.169304000 | 3.517920000  | 0.746714000   | 6  | 3.387685000  | -2.816677000 | 0.208219000  |
| 6  | 0.231171000  | 2.261593000  | 0.311897000   | 6  | 2.895624000  | -2.504791000 | -1.198997000 |
| 6  | -2.002881000 | -0.946025000 | 0.381128000   | 6  | 2.136773000  | -1.184387000 | -1.232391000 |
| 6  | -2.897299000 | -1.909777000 | 0.825937000   | 1  | -2.241146000 | 0.953935000  | -0.308130000 |
| 6  | -2.960495000 | -3.137856000 | 0.167514000   | 1  | 0.479300000  | 0.944933000  | 1.848943000  |
| 6  | -2.130068000 | -3.397132000 | -0.930562000  | 1  | 0.284993000  | -2.020352000 | -0.537781000 |
| 6  | -1.244475000 | -2.436538000 | -1.365051000  | 1  | -1.489718000 | 2.328910000  | 1.194117000  |
| 8  | -1.720274000 | 5.354506000  | 0.484869000   | 1  | -0.170655000 | 3.282154000  | 1.854587000  |
| 8  | 5.482157000  | -1.194402000 | 0.576895000   | 1  | -0.737063000 | 2.961963000  | -1.133511000 |
| 8  | -3.799382000 | -4.132338000 | 0.521892000   | 1  | -1.120856000 | 4.374742000  | -0.167771000 |
| 6  | -1.058337000 | 6.044311000  | 1.536060000   | 1  | 1.040647000  | 4.680222000  | -1.383590000 |
| 6  | 5.729689000  | -2.145412000 | 1.603283000   | 1  | 1.266558000  | 4.711361000  | 0.361714000  |
| 6  | -4.668435000 | -3.913069000 | 1.624353000   | 1  | 1.813708000  | 2.335390000  | -1.472104000 |
| 1  | 2.588492000  | 0.986511000  | -2.032668000  | 1  | 3.016984000  | 3.319426000  | -0.665684000 |
| 1  | 4.872580000  | 0.467458000  | -1.227218000  | 1  | 2.196518000  | 2.619161000  | 1.546895000  |
| 1  | 3.251117000  | -2.384977000 | 1.541342000   | 1  | 2.643500000  | 1.211452000  | 0.595554000  |
| 1  | 0.988538000  | -1.878832000 | 0.743533000   | 1  | -1.633713000 | -1.618148000 | 1.225584000  |
| 1  | -2.073918000 | 1.755541000  | -2.135122000  | 1  | -1.773810000 | -0.016222000 | 1.958327000  |
| 1  | -2.784211000 | 4.001227000  | -1.365155000  | 1  | -3.904166000 | -1.282794000 | 2.182036000  |
| 1  | 0.368584000  | 3.999988000  | 1.549410000   | 1  | -4.125426000 | 0.142868000  | 1.171883000  |
| 1  | 1.078623000  | 1.781063000  | 0.785477000   | 1  | -3.688766000 | -2.699346000 | 0.152812000  |
| 1  | -1.954841000 | 0.009712000  | 0.889061000   | 1  | -5.221124000 | -1.833490000 | 0.135471000  |
| 1  | -3.534601000 | -1.696423000 | 1.671256000   | 1  | -4.105701000 | -1.720765000 | -2.092792000 |
| 1  | -2.204330000 | -4.356103000 | -1.425359000  | 1  | -4.242764000 | -0.117927000 | -1.376188000 |
| 1  | -0.603830000 | -2.636495000 | -2.215670000  | 1  | -1.969360000 | -0.461430000 | -2.326833000 |
| 1  | -1.580320000 | 6.988261000  | 1.658436000   | 1  | -1.763332000 | -1.888894000 | -1.308084000 |
| 1  | -1.109266000 | 5.475153000  | 2.465341000   | 1  | 2.144796000  | -0.740925000 | 1.514298000  |
| 1  | -0.015215000 | 6.233700000  | 1.278553000   | 1  | 0.631107000  | -1.855061000 | 1.885085000  |
| 1  | 6.804836000  | -2.161018000 | 1.752612000   | 1  | 2.569527000  | -3.082517000 | 2.195028000  |
| 1  | 5.235975000  | -1.851810000 | 2.530810000   | 1  | 1.534224000  | -3.662220000 | 0.893469000  |
| 1  | 5.387479000  | -3.136892000 | 1.303276000   | 1  | 4.089435000  | -2.034725000 | -0.524416000 |
| 1  | -4.098975000 | -3.726741000 | 2.536032000   | 1  | 3.930069000  | -3.763446000 | 0.219877000  |
| 1  | -5.335492000 | -3.072093000 | 1.430012000   | 1  | 3.729237000  | -2.468421000 | -1.901920000 |
| 1  | -5.251619000 | -4.821511000 | 1.738986000   | 1  | 2.225225000  | -3.305483000 | -1.529701000 |
| 1  | 0.009479000  | -0.017491000 | -2.631044000  | 1  | 1.756333000  | -0.982170000 | -2.235579000 |
|    |              | Ppfp3H_1     |               | 1  | 2.814275000  | -0.364858000 | -0.968699000 |
| 15 | 0.000726000  | 0.001606000  | 1.016483000   | 1  | 0.206095000  | 0.798677000  | -1.604621000 |
| 6  | 1.349606000  | -1.016187000 | 0.479900000   |    |              | PCy3H_2      |              |
| 6  | 1.183910000  | -1.920301000 | -0.567912000  | 15 | -0.003520000 | -0.130457000 | -0.681797000 |
| 6  | 2.593993000  | -0.855080000 | 1.095203000   | 6  | -0.201430000 | 1.599288000  | -0.198859000 |
| 6  | 2.264107000  | -2.671112000 | -1.006130000  | 6  | 1.423041000  | -0.909650000 | 0.088614000  |
| 1  | 0.218069000  | -2.042491000 | -1.041580000  | 6  | -1.513310000 | -1.055536000 | -0.391301000 |
| 6  | 3.676272000  | -1.601201000 | 0.664803000   | 6  | 2.705852000  | -0.319947000 | -0.510414000 |
| 1  | 2.713924000  | -0.149481000 | 1.908095000   | 6  | 3.932400000  | -0.115943000 | 0.115943000  |
| 6  | 3.482844000  | -2.491973000 | -0.378689000  | 6  | 3.897697000  | -2.479721000 | -0.079505000 |
| 1  | 2.170846000  | -3.382285000 | -1.814628000  | 6  | 2.627984000  | -3.062353000 | 0.525063000  |
| 1  | 4.651760000  | -1.505145000 | 1.120070000   | 6  | 1.382313000  | -2.430485000 | -0.085556000 |
| 6  | 0.206221000  | 1.673644000  | 0.465339000   | 6  | 0.402703000  | 2.547771000  | -1.239507000 |
| 6  | -0.544703000 | 2.677790000  | 1.081929000   | 6  | 0.122329000  | 3.991808000  | -0.843750000 |
| 6  | 1.059969000  | 1.970314000  | -0.595806000  | 6  | 0.657370000  | 4.289658000  | 0.551081000  |
| 6  | -0.439964000 | 3.984421000  | 0.640136000   | 6  | 0.051892000  | 3.336784000  | 1.573721000  |
| 1  | -1.205927000 | 2.438220000  | 1.905499000   | 6  | 0.347775000  | 1.888748000  | 1.202185000  |
| 6  | 1.169247000  | 3.277245000  | -1.045796000  | 6  | -2.667284000 | -0.526373000 | -1.246205000 |
| 1  | 1.639478000  | 1.188182000  | -1.069609000  | 6  | -3.910225000 | -1.374666000 | -1.000831000 |
| 6  | 0.416194000  | 4.250825000  | -0.416113000  | 6  | -4.281775000 | -1.375870000 | 0.476786000  |
| 1  | -1.001264000 | 4.787106000  | 1.096944000   | 6  | -3.124341000 | -1.886262000 | 1.325940000  |
| 1  | 1.822351000  | 3.543583000  | -1.864634000  | 6  | -1.874659000 | -1.044922000 | 1.095972000  |
| 6  | -1.553415000 | -0.658345000 | 0.474956000   | 1  | -1.287564000 | 1.757122000  | -0.178099000 |
| 6  | -2.247230000 | -0.063482000 | -0.577685000  | 1  | 1.371898000  | -0.670212000 | 1.157429000  |
| 6  | -2.043428000 | -1.812496000 | 1.091950000   | 1  | -1.293331000 | -2.082523000 | -0.705325000 |
| 6  | -3.438563000 | -0.619410000 | -0.1018378000 | 1  | 2.703380000  | -0.511190000 | -1.589715000 |
| 1  | -1.864243000 | 0.830819000  | -1.052679000  | 1  | 2.732533000  | 0.762392000  | -0.371105000 |
| 6  | -3.232161000 | -2.372186000 | 0.659590000   | 1  | 4.836272000  | -0.542811000 | -0.320180000 |
| 1  | -1.498260000 | -2.270167000 | 1.908120000   | 1  | 3.948723000  | -0.744613000 | 1.187444000  |
| 6  | -3.900646000 | -1.759738000 | -0.388054000  | 1  | 3.921419000  | -2.702675000 | -1.151943000 |
| 1  | -4.003158000 | -0.183010000 | -1.830053000  | 1  | 4.778649000  | -2.943545000 | 0.367091000  |
| 1  | -3.642686000 | -3.260976000 | 1.117327000   | 1  | 2.592898000  | -4.143875000 | 0.386105000  |
| 9  | 0.520891000  | 5.514175000  | -0.844716000  | 1  | 2.625443000  | -2.873104000 | 1.603882000  |
| 4  | 4.527642000  | -3.216306000 | -0.796705000  | 1  | 0.487661000  | -2.842284000 | 0.384661000  |
| 9  | -5.051911000 | -2.298344000 | -0.806827000  | 1  | 1.334463000  | -2.666892000 | -1.155082000 |

|    |              |              |              |    |              |              |              |
|----|--------------|--------------|--------------|----|--------------|--------------|--------------|
| 1  | 1.484038000  | 2.383539000  | -1.290981000 | 6  | -3.507908000 | 3.931661000  | 0.079757000  |
| 1  | -0.008625000 | 2.329056000  | -2.226818000 | 1  | 0.488193000  | -1.630445000 | -1.287660000 |
| 1  | 0.561453000  | 4.667844000  | -1.578972000 | 1  | 1.224951000  | -2.002539000 | 0.272352000  |
| 1  | -0.960477000 | 4.157082000  | -0.855459000 | 1  | 1.171497000  | 1.234029000  | -1.289644000 |
| 1  | 1.746267000  | 4.167678000  | 0.550987000  | 1  | 1.124834000  | 2.062657000  | 0.267289000  |
| 1  | 0.448154000  | 5.325011000  | 0.824876000  | 1  | -1.647803000 | 0.400868000  | -1.292805000 |
| 1  | 0.438210000  | 3.545881000  | 2.527373000  | 1  | -2.347136000 | -0.062097000 | 0.259732000  |
| 1  | -1.033132000 | 3.482970000  | 1.606376000  | 1  | 2.752518000  | 0.328007000  | 1.187200000  |
| 1  | -0.083074000 | 1.202581000  | 1.934857000  | 1  | 2.877285000  | -0.360885000 | -0.424329000 |
| 1  | 1.431613000  | 1.733824000  | 1.204424000  | 1  | 3.686798000  | 1.834267000  | -1.294376000 |
| 1  | -2.881777000 | 0.510545000  | -0.967488000 | 1  | 3.579215000  | 2.509688000  | 0.320673000  |
| 1  | -2.390774000 | -0.534906000 | -2.302500000 | 1  | 5.367761000  | 0.152497000  | -0.486018000 |
| 1  | -4.737195000 | -1.000091000 | -1.605826000 | 1  | 5.930016000  | 1.795684000  | -0.172932000 |
| 1  | -3.709037000 | -2.401667000 | -1.323378000 | 1  | 5.257133000  | 0.827225000  | 1.139500000  |
| 1  | -4.525960000 | -0.352992000 | 0.784320000  | 1  | -1.100307000 | -2.539675000 | -1.182593000 |
| 1  | -5.172018000 | -1.984321000 | 0.643914000  | 1  | -1.746370000 | -2.310820000 | -0.435538000 |
| 1  | -3.387941000 | -1.875041000 | 2.384465000  | 1  | -0.238976000 | -4.112226000 | -1.283865000 |
| 1  | -2.906847000 | -2.924852000 | 1.054694000  | 1  | 0.379931000  | -4.351930000 | -0.339355000 |
| 1  | -1.038315000 | -1.412579000 | 1.697227000  | 1  | -2.545879000 | -4.721284000 | -0.501838000 |
| 1  | -2.072125000 | -0.010579000 | 1.401384000  | 1  | -1.410391000 | -6.020742000 | -0.167099000 |
| 1  | 0.227928000  | -0.153948000 | -2.052949000 | 1  | -1.928679000 | -4.955330000 | 1.133131000  |
|    |              | Pcy3H_3      |              |    | -1.663499000 | 2.214450000  | 1.189666000  |
| 15 | 0.093041000  | 0.033528000  | -0.479269000 | 1  | -1.127668000 | 2.672684000  | -0.420591000 |
| 6  | -0.788315000 | -1.520728000 | -0.257606000 | 1  | -3.429754000 | 2.271758000  | -1.295616000 |
| 6  | -0.728613000 | 1.449067000  | 0.271958000  | 1  | -3.964115000 | 1.836743000  | 0.317202000  |
| 6  | 1.803830000  | -0.056332000 | 0.108926000  | 1  | -3.354927000 | 4.131856000  | 1.142205000  |
| 6  | -2.145730000 | 1.637341000  | -0.277518000 | 1  | -2.820689000 | 4.568767000  | -0.480543000 |
| 6  | -2.799549000 | 2.870421000  | 0.335510000  | 1  | -4.525066000 | 4.229831000  | -0.174988000 |
| 6  | -1.960553000 | 4.116359000  | 0.095274000  | 1  | -0.000161000 | 0.002470000  | 1.717247000  |
| 6  | -0.565752000 | 3.924619000  | 0.671566000  |    |              | PBu3H_2      |              |
| 6  | 0.116710000  | 2.710356000  | 0.053869000  | 15 | -0.168876000 | -0.143389000 | -0.510003000 |
| 6  | -1.885896000 | -1.756839000 | -1.299439000 | 6  | 0.819173000  | -1.577259000 | -0.913216000 |
| 6  | -2.481206000 | -3.144132000 | -1.086760000 | 6  | 0.531632000  | 1.326597000  | -1.243329000 |
| 6  | -3.021671000 | -3.292399000 | 0.330482000  | 6  | -1.854901000 | -0.374377000 | -1.053125000 |
| 6  | -1.925014000 | -3.042123000 | 1.358357000  | 6  | -0.350462000 | 2.565275000  | -1.067998000 |
| 6  | -1.319937000 | -1.656244000 | 1.172170000  | 6  | -0.711943000 | 2.862623000  | 0.384532000  |
| 6  | 2.730833000  | 0.613704000  | -0.914921000 | 6  | 0.506907000  | 2.985440000  | 1.287289000  |
| 6  | 4.155247000  | 0.658163000  | -0.378847000 | 6  | 2.314739000  | -1.368014000 | -0.677468000 |
| 6  | 4.650388000  | -0.744008000 | -0.050474000 | 6  | 2.654305000  | -0.980432000 | 0.755456000  |
| 6  | 3.717099000  | -1.423191000 | 0.942861000  | 6  | 4.156433000  | -0.957445000 | 0.984993000  |
| 6  | 2.290058000  | -2.475881000 | 0.408900000  | 6  | -2.462398000 | -1.698707000 | -0.583494000 |
| 1  | -0.021099000 | -2.288703000 | -0.415939000 | 6  | -2.410406000 | -1.899123000 | 0.928317000  |
| 1  | -0.775318000 | 1.227776000  | 1.345890000  | 6  | -3.054747000 | -0.757864000 | 1.701676000  |
| 1  | 1.818404000  | 0.520877000  | 1.041520000  | 1  | 0.436624000  | -2.403297000 | -0.307869000 |
| 1  | -2.089446000 | 1.751653000  | -1.366528000 | 1  | 0.604319000  | -1.805991000 | -1.959903000 |
| 1  | -2.754944000 | 0.757564000  | -0.069361000 | 1  | 1.518001000  | 1.466754000  | -0.794135000 |
| 1  | -3.802979000 | 2.990580000  | -0.075415000 | 1  | 0.684623000  | 1.094176000  | -2.299930000 |
| 1  | -2.906938000 | 2.713146000  | 1.414147000  | 1  | -2.427392000 | 0.483927000  | -0.693022000 |
| 1  | -1.883147000 | 4.297702000  | -0.982413000 | 1  | -1.830311000 | -0.315085000 | -2.143806000 |
| 1  | -2.440327000 | 4.990849000  | 0.537698000  | 1  | 0.192242000  | 3.414738000  | -1.487760000 |
| 1  | 0.049859000  | 4.809903000  | 0.505765000  | 1  | -1.260602000 | 2.444036000  | -1.658761000 |
| 1  | -0.640309000 | 3.777577000  | 1.754255000  | 1  | -1.287368000 | 3.789408000  | 0.411343000  |
| 1  | 1.112016000  | 2.584746000  | 0.483157000  | 1  | -1.380061000 | 2.082688000  | 0.769525000  |
| 1  | 0.238932000  | 2.869630000  | -1.024305000 | 1  | 0.224870000  | 3.310550000  | 2.287630000  |
| 1  | -2.673783000 | -1.007342000 | -1.193613000 | 1  | 1.031089000  | 2.031636000  | 1.391798000  |
| 1  | -1.472757000 | -1.659853000 | -2.305253000 | 1  | 1.216549000  | 3.709646000  | 0.880454000  |
| 1  | -3.268509000 | -3.324099000 | -1.820276000 | 1  | 2.825560000  | -2.299671000 | -0.930504000 |
| 1  | -1.701039000 | -3.894554000 | -1.254332000 | 1  | 2.693982000  | -0.605838000 | -1.363679000 |
| 1  | -3.826878000 | -2.565138000 | 0.483717000  | 1  | 2.237438000  | 0.007683000  | 0.983611000  |
| 1  | -3.452586000 | -4.285165000 | 0.469909000  | 1  | 2.175080000  | -1.685405000 | 1.441568000  |
| 1  | -2.315721000 | -3.142389000 | 2.371974000  | 1  | 4.638495000  | -0.250551000 | 0.306656000  |
| 1  | -1.136791000 | -3.792976000 | 1.236305000  | 1  | 4.403878000  | -0.666125000 | 2.005699000  |
| 1  | -0.520585000 | -1.477057000 | 1.896247000  | 1  | 4.588798000  | -1.942756000 | 0.800388000  |
| 1  | -2.090997000 | -0.897171000 | 1.341378000  | 1  | -3.502310000 | -1.716918000 | -0.915887000 |
| 1  | 2.701973000  | 0.021955000  | -1.836621000 | 1  | -1.952854000 | -2.524465000 | -1.084361000 |
| 1  | 2.378467000  | 1.616133000  | -1.164889000 | 1  | -2.913876000 | -2.837596000 | 1.166326000  |
| 1  | 4.808912000  | 1.138065000  | -1.108798000 | 1  | -1.371003000 | -2.024714000 | 1.252310000  |
| 1  | 4.174166000  | 1.271851000  | 0.528315000  | 1  | -2.492124000 | 0.173047000  | 1.591833000  |
| 1  | 4.683342000  | -1.335486000 | -0.972030000 | 1  | -4.070342000 | -0.574422000 | 1.343205000  |
| 1  | 5.666270000  | -0.706828000 | 0.346181000  | 1  | -3.107416000 | -0.983318000 | 2.766674000  |
| 1  | 4.061398000  | -2.433954000 | 1.166659000  | 1  | -0.172730000 | 0.015465000  | 0.868841000  |
| 1  | 3.721882000  | -0.862354000 | 1.883720000  |    |              | PBu3H_3      |              |
| 1  | 1.633121000  | -1.965657000 | 1.130021000  | 15 | -0.209090000 | 0.218185000  | -0.192352000 |
| 1  | 2.267853000  | -2.065289000 | -0.513978000 | 6  | -1.763634000 | 0.305765000  | -1.069440000 |
| 1  | 0.141575000  | 0.284458000  | -1.847221000 | 6  | 0.429363000  | -1.445833000 | -0.207671000 |
|    |              | PBu3H_1      |              |    | 0.957796000  | 1.375721000  | -0.894983000 |
| 15 | 0.001142000  | 0.000929000  | 0.329518000  | 6  | -0.599320000 | -2.450486000 | 0.315716000  |
| 6  | 0.302161000  | -1.671703000 | -0.211147000 | 6  | 0.020037000  | -3.822625000 | 0.556330000  |
| 6  | 1.300207000  | 1.096392000  | -0.212710000 | 6  | 0.600663000  | -4.437431000 | -0.708344000 |
| 6  | -1.597241000 | 0.576513000  | -0.214615000 | 6  | -2.287960000 | 1.735146000  | -1.226167000 |
| 6  | 2.693131000  | 0.568285000  | 0.121239000  | 6  | -2.454342000 | 2.483153000  | 0.093689000  |
| 6  | 3.768205000  | 1.585932000  | -0.232607000 | 6  | -3.339000000 | 1.746844000  | 1.089085000  |
| 6  | 5.161518000  | 1.064316000  | 0.077986000  | 6  | 2.379494000  | 2.073355000  | -0.361980000 |
| 6  | -0.853696000 | -2.612850000 | 0.118630000  | 6  | 2.478088000  | 1.368178000  | 1.148439000  |
| 6  | -0.507525000 | -4.054338000 | -0.225471000 | 6  | 3.392365000  | 1.349254000  | 1.618033000  |
| 6  | -1.661095000 | -4.996917000 | 0.075395000  | 1  | -1.588091000 | -0.159413000 | -2.042575000 |
| 6  | -1.839916000 | 2.045690000  | 0.122787000  | 1  | -2.472409000 | -0.325694000 | -0.529494000 |
| 6  | -3.258814000 | 2.465291000  | -0.233092000 | 1  | 0.727878000  | -1.659256000 | -1.236804000 |



|    |              |              |               |    |              |              |              |
|----|--------------|--------------|---------------|----|--------------|--------------|--------------|
| 1  | 1.332442000  | -1.451993000 | 0.410300000   | 1  | 2.255768000  | 1.838247000  | 0.422732000  |
| 1  | 0.911995000  | 1.224352000  | -1.976402000  | 1  | 0.902609000  | 3.920231000  | -0.059219000 |
| 1  | 0.574031000  | 2.377755000  | -0.685354000  | 1  | 1.618429000  | 4.666977000  | 1.357427000  |
| 1  | -1.033889000 | -2.074280000 | 1.246349000   | 1  | 2.915832000  | 5.294686000  | -0.695747000 |
| 1  | -1.415465000 | -2.538888000 | -0.406325000  | 1  | 3.917973000  | 4.294701000  | 0.359024000  |
| 1  | 0.799820000  | -3.731963000 | 1.317507000   | 1  | 3.156935000  | 3.583624000  | -1.064088000 |
| 1  | -0.747094000 | -4.481764000 | 0.967188000   | 1  | -3.629773000 | 2.038431000  | -2.849142000 |
| 1  | 1.447152000  | -3.859463000 | -1.082999000  | 1  | -3.898869000 | 3.014620000  | -1.415781000 |
| 1  | 0.951770000  | -5.453423000 | -0.527228000  | 1  | -1.655784000 | 3.450304000  | -2.174108000 |
| 1  | -0.152633000 | -4.477109000 | -1.498672000  | 1  | -1.517294000 | 2.534864000  | -0.695096000 |
| 1  | -1.620202000 | 2.292456000  | -1.886305000  | 1  | -1.279852000 | 0.427368000  | -2.194383000 |
| 1  | -3.254747000 | 1.673338000  | -1.730063000  | 1  | -1.117757000 | 1.537913000  | -3.539178000 |
| 1  | -1.472915000 | 2.675077000  | 0.542067000   | 1  | 1.150962000  | 0.953945000  | -2.681980000 |
| 1  | -2.880460000 | 3.464218000  | -0.122777000  | 1  | 0.828677000  | 2.645736000  | -2.279311000 |
| 1  | -4.295290000 | 1.482063000  | 0.631964000   | 1  | 0.654815000  | 1.394499000  | -1.043716000 |
| 1  | -2.872699000 | 0.823537000  | 1.440726000   |    |              | POct3H_2     |              |
| 1  | -3.542511000 | 2.362765000  | 1.964961000   | 15 | 2.169930000  | -1.308596000 | -0.178207000 |
| 1  | 2.769638000  | 0.228363000  | -0.653804000  | 6  | 2.018544000  | -2.201301000 | -1.364509000 |
| 1  | 3.010226000  | 1.954473000  | -0.848511000  | 6  | 3.856850000  | -0.747201000 | -0.370831000 |
| 1  | 1.994681000  | 2.304975000  | 1.441383000   | 6  | 1.730517000  | -2.349353000 | -1.563075000 |
| 1  | 1.924014000  | 0.563684000  | 1.644228000   | 6  | 4.183491000  | 0.522158000  | 0.421217000  |
| 1  | 4.486796000  | 2.165127000  | 1.161105000   | 6  | 3.272712000  | 1.707425000  | 0.104376000  |
| 1  | 3.997175000  | 1.452815000  | 2.700509000   | 6  | 3.080032000  | 1.965784000  | -1.385137000 |
| 1  | 4.407622000  | 0.412250000  | 1.335553000   | 6  | 0.625847000  | -2.238229000 | 2.020741000  |
| 1  | -0.445121000 | 0.554206000  | 1.133133000   | 6  | 0.560232000  | -1.333900000 | 3.246661000  |
|    |              | POct3H_1     |               | 6  | 0.691269000  | 0.151574000  | 2.930563000  |
| 15 | -1.608069000 | -1.590700000 | 0.395036000   | 6  | 0.379014000  | -3.041218000 | -1.405437000 |
| 6  | -1.410408000 | -2.734375000 | -0.967309000  | 6  | -0.800227000 | -0.801052000 | -1.462131000 |
| 6  | -3.361894000 | -1.494937000 | 0.766036000   | 6  | -2.118630000 | -2.797040000 | -1.207903000 |
| 6  | -0.622683000 | -2.162930000 | 1.774208000   | 6  | -0.479032000 | 0.700984000  | 2.122749000  |
| 6  | -3.910130000 | -0.168627000 | 1.303038000   | 6  | -0.536915000 | 2.122265000  | 0.088656000  |
| 6  | -3.520255000 | 1.057887000  | 0.481427000   | 6  | -1.739686000 | 2.786798000  | 1.380885000  |
| 6  | -3.754509000 | 0.913205000  | -1.016828000  | 6  | -3.058011000 | 2.503288000  | 2.088567000  |
| 6  | 0.040475000  | -3.059183000 | -1.313923000  | 6  | -3.329608000 | -1.870033000 | -1.202656000 |
| 6  | 0.809608000  | -1.825307000 | -1.763406000  | 6  | -3.465184000 | -1.043444000 | 0.073165000  |
| 6  | 2.172523000  | -2.146815000 | -2.362360000  | 6  | -4.732980000 | -0.192511000 | 0.088656000  |
| 6  | -0.784595000 | -1.361199000 | 3.065721000   | 6  | -4.666483000 | 0.987921000  | -0.871568000 |
| 6  | -0.585616000 | 0.139154000  | 2.888715000   | 6  | 2.030306000  | 3.041237000  | -1.650528000 |
| 6  | 0.722128000  | 0.566471000  | 2.234921000   | 6  | 0.600180000  | 2.539513000  | -1.463400000 |
| 6  | 3.121581000  | -2.856526000 | -1.399824000  | 6  | 0.117939000  | 1.594905000  | -2.559080000 |
| 6  | 3.369834000  | -2.091397000 | -0.1073262000 | 6  | -1.366933000 | 1.297635000  | -2.411844000 |
| 6  | 3.863721000  | -0.667075000 | -0.328017000  | 1  | 1.314763000  | -0.213313000 | -0.157282000 |
| 6  | 4.405671000  | -0.044199000 | 0.949006000   | 1  | 2.382058000  | -3.205767000 | 1.130859000  |
| 6  | 0.676750000  | 2.040564000  | 1.858433000   | 1  | 2.750841000  | -1.754732000 | 2.044901000  |
| 6  | 1.951584000  | 2.545381000  | 1.203967000   | 1  | 4.478311000  | -1.584774000 | -0.043923000 |
| 6  | 1.796288000  | 3.922490000  | 0.576057000   | 1  | 4.033370000  | -0.615872000 | -1.439318000 |
| 6  | 3.012719000  | 4.302972000  | -0.252691000  | 1  | 1.758529000  | -1.716499000 | -2.455228000 |
| 6  | -3.338267000 | 2.157658000  | -1.801163000  | 1  | 2.545181000  | -3.073812000 | -1.644909000 |
| 6  | -1.842243000 | 2.463876000  | -1.739227000  | 1  | 4.139142000  | 0.302175000  | 1.491038000  |
| 6  | -0.967891000 | 1.442834000  | -2.459840000  | 1  | 5.219360000  | 0.781325000  | 0.194191000  |
| 6  | 0.502273000  | 1.616495000  | -2.105065000  | 1  | 2.296315000  | 1.560716000  | 0.578286000  |
| 1  | -1.138053000 | -0.338923000 | 0.006859000   | 1  | 3.691495000  | 2.603853000  | 0.568717000  |
| 1  | -1.969936000 | -3.626803000 | -0.674797000  | 1  | 4.041643000  | 2.246295000  | -1.824390000 |
| 1  | -1.929400000 | -2.283913000 | -1.819333000  | 1  | 2.770063000  | -1.079997000 | -1.896580000 |
| 1  | -3.857054000 | -1.759585000 | -0.171548000  | 1  | -0.161529000 | -1.958566000 | 1.313875000  |
| 1  | -3.557216000 | -2.311418000 | 1.465879000   | 1  | 0.416122000  | -3.265925000 | 2.316670000  |
| 1  | -0.905457000 | -3.208920000 | 1.919119000   | 1  | -0.391465000 | -1.498618000 | 3.759503000  |
| 1  | 0.413766000  | -2.157398000 | 1.426111000   | 1  | 1.352441000  | -1.635991000 | 3.937573000  |
| 1  | -4.997405000 | -2.268965000 | 1.316611000   | 1  | 0.751444000  | 0.751444000  | 3.872333000  |
| 1  | -3.594214000 | -0.032889000 | 2.339156000   | 1  | 1.636115000  | 0.348582000  | 2.405799000  |
| 1  | -4.085435000 | 1.918694000  | 0.849346000   | 1  | 0.279407000  | -3.781135000 | -2.202221000 |
| 1  | -2.468349000 | 1.296556000  | 0.662567000   | 1  | 0.359257000  | -3.599483000 | -0.463333000 |
| 1  | -3.210334000 | 0.044227000  | -1.404790000  | 1  | -0.673625000 | -1.273132000 | -0.730430000 |
| 1  | -4.813912000 | -0.740039000 | -1.194241000  | 1  | -0.824183000 | -1.597263000 | -2.444528000 |
| 1  | 0.530025000  | -3.531321000 | -0.458098000  | 1  | -2.243702000 | -3.569373000 | -1.972597000 |
| 1  | 0.036717000  | -3.798007000 | -2.119262000  | 1  | -2.059676000 | -3.319576000 | -0.244816000 |
| 1  | 0.207734000  | -1.294352000 | -2.506624000  | 1  | -0.430762000 | 0.353528000  | 1.081078000  |
| 1  | 0.932852000  | -1.133091000 | -0.918289000  | 1  | -1.407858000 | 0.289533000  | 2.534684000  |
| 1  | 2.027537000  | -2.772783000 | -3.247803000  | 1  | -0.569145000 | 2.571872000  | 3.170948000  |
| 1  | 2.634342000  | -1.218182000 | -2.711046000  | 1  | 0.391934000  | 2.615266000  | 1.703315000  |
| 1  | -1.782000000 | -1.543068000 | 3.473621000   | 1  | -1.618722000 | 3.866058000  | 1.257973000  |
| 1  | -0.067934000 | -1.755632000 | 3.788555000   | 1  | -1.766090000 | 2.359947000  | 0.371488000  |
| 1  | -1.410268000 | 0.541658000  | 2.290609000   | 1  | -3.902269000 | 2.947560000  | 1.558703000  |
| 1  | -0.671461000 | 0.624962000  | 3.863760000   | 1  | -3.044469000 | 2.911641000  | 3.102053000  |
| 1  | 1.563872000  | 0.362453000  | 2.905095000   | 1  | -3.247181000 | 1.430899000  | 2.165747000  |
| 1  | 0.912550000  | -0.010032000 | 1.317162000   | 1  | -3.279113000 | -1.211632000 | -2.076956000 |
| 1  | 2.734090000  | -3.852722000 | -1.168229000  | 1  | -4.242800000 | -2.463003000 | -1.313667000 |
| 1  | 4.080355000  | -3.007253000 | -1.904876000  | 1  | -3.469616000 | -1.730015000 | 0.926760000  |
| 1  | 2.455835000  | -2.062663000 | 0.503850000   | 1  | -2.592900000 | -0.390021000 | 0.204410000  |
| 1  | 4.111546000  | -2.632966000 | 0.492082000   | 1  | -5.587503000 | -0.828789000 | -0.163245000 |
| 1  | 4.643371000  | -0.676571000 | -1.097322000  | 1  | -4.912544000 | 0.180643000  | 1.099791000  |
| 1  | 3.047630000  | -0.050901000 | -0.725379000  | 1  | -5.585290000 | 1.575556000  | -0.845688000 |
| 1  | 4.728429000  | 0.987196000  | 0.795591000   | 1  | -3.837756000 | 1.649502000  | -0.606380000 |
| 1  | 3.643751000  | -0.040422000 | 1.732986000   | 1  | -4.510489000 | 0.662280000  | -1.902460000 |
| 1  | 5.260009000  | -0.614664000 | 1.319914000   | 1  | 2.215757000  | 3.887405000  | -0.981419000 |
| 1  | -0.159699000 | 2.181552000  | 1.159517000   | 1  | 2.133023000  | 3.420048000  | -2.671678000 |
| 1  | 0.441954000  | 2.643657000  | 2.742146000   | 1  | 0.501262000  | 2.029189000  | -0.497608000 |
| 1  | 2.769801000  | 2.558960000  | 1.932515000   | 1  | -0.082157000 | 3.395372000  | -1.423043000 |



|    |              |              |              |    |              |                           |              |
|----|--------------|--------------|--------------|----|--------------|---------------------------|--------------|
| 6  | -2.813416000 | 0.362013000  | 0.882852000  | 1  | -6.761606000 | -0.411150000              | 0.402085000  |
| 6  | -4.077396000 | 0.140898000  | 0.384376000  | 1  | -6.475223000 | 0.818571000               | -0.859256000 |
| 6  | -4.282127000 | -0.828739000 | -0.607687000 | 1  | 4.057704000  | -4.059571000              | -2.411829000 |
| 6  | -3.203076000 | -1.566200000 | -1.096232000 | 1  | 5.191436000  | -3.638591000              | -1.100111000 |
| 6  | -1.931858000 | -1.336485000 | -0.586545000 | 1  | 4.924345000  | -5.341046000              | -1.536624000 |
| 6  | 1.573390000  | 2.139386000  | 1.045132000  | 6  | -0.154893000 | 0.028560000               | 2.841697000  |
| 6  | 2.053657000  | 3.334495000  | 0.558569000  | 1  | 0.845576000  | 0.192001000               | 3.242005000  |
| 6  | 1.443279000  | 3.939279000  | -0.549312000 | 1  | -0.814284000 | 0.836557000               | 3.157874000  |
| 6  | 0.344765000  | 3.331817000  | -1.158909000 | 1  | -0.539296000 | -0.922368000              | 3.210340000  |
| 6  | -0.131217000 | 2.125944000  | -0.662152000 |    |              |                           |              |
| 6  | 2.027381000  | -1.120183000 | -0.369696000 | 15 | -0.108901000 | Pani3Me_3<br>-0.024961000 | 1.085045000  |
| 6  | 2.880534000  | -2.149463000 | -0.746775000 | 6  | 0.971825000  | -1.351848000              | 0.616907000  |
| 6  | 2.712742000  | -3.418194000 | -0.190892000 | 6  | 0.504869000  | 1.517465000               | 0.458966000  |
| 6  | 1.684839000  | -3.648628000 | 0.735087000  | 6  | -1.737637000 | -0.324097000              | 0.446690000  |
| 6  | 0.845005000  | -2.622364000 | 1.103180000  | 6  | -2.802429000 | 0.457954000               | 0.896999000  |
| 8  | 1.977136000  | 5.099612000  | -0.957058000 | 6  | -4.080257000 | 0.275340000               | 0.393697000  |
| 8  | -5.545360000 | -0.983153000 | -1.030113000 | 6  | -4.301536000 | -0.703820000              | -0.579985000 |
| 8  | 3.486651000  | -4.473233000 | -0.484428000 | 6  | -3.236502000 | -1.485198000              | -1.040459000 |
| 6  | 1.404800000  | 5.748011000  | -2.081689000 | 6  | -1.967344000 | -1.296060000              | -0.533202000 |
| 6  | -5.808847000 | -1.956387000 | -2.027994000 | 6  | 1.586468000  | 2.138710000               | 1.084425000  |
| 6  | 4.550810000  | -4.297518000 | -1.405926000 | 6  | 2.109376000  | 3.322636000               | 0.589165000  |
| 1  | -2.665917000 | 1.120310000  | 1.643050000  | 6  | 1.546521000  | 3.897082000               | -0.554347000 |
| 1  | -4.928455000 | 0.703350000  | 0.744790000  | 6  | 0.466517000  | 3.274556000               | -1.190437000 |
| 1  | -3.342097000 | -2.314448000 | -1.862944000 | 6  | -0.047769000 | 2.096785000               | -0.689523000 |
| 1  | -1.099086000 | -1.913401000 | -0.969628000 | 6  | 1.970300000  | -1.170950000              | -0.346136000 |
| 1  | 2.058014000  | 1.680228000  | 1.898446000  | 6  | 2.776047000  | -2.227726000              | -0.717726000 |
| 1  | 2.902174000  | 3.825163000  | 1.016660000  | 6  | 2.597105000  | -3.487123000              | -0.135581000 |
| 1  | -0.142600000 | 3.787011000  | -2.008701000 | 6  | -1.599270000 | -3.678265000              | 0.825708000  |
| 1  | -0.983699000 | 1.659045000  | -1.140491000 | 8  | 0.794842000  | -2.611614000              | 1.192046000  |
| 1  | 2.163036000  | -0.136963000 | -0.803660000 | 8  | 1.979848000  | 5.041048000               | -1.103466000 |
| 1  | 3.664455000  | -1.954667000 | -1.463978000 | 8  | -5.501559000 | -0.956502000              | -1.122758000 |
| 1  | 1.571584000  | -4.641973000 | 1.148564000  | 8  | 3.422990000  | -4.456956000              | -0.554619000 |
| 1  | 0.048212000  | -2.812340000 | 1.813676000  | 6  | 3.072044000  | 5.712928000               | -0.496392000 |
| 1  | 1.988153000  | 6.649310000  | -2.245740000 | 6  | -6.614272000 | -0.188254000              | -0.693601000 |
| 1  | 1.459426000  | 5.112892000  | -2.968031000 | 6  | 3.281907000  | -5.755008000              | 0.000089000  |
| 1  | 0.364710000  | 0.018656000  | -1.889361000 | 1  | -2.638385000 | 1.224998000               | 1.645203000  |
| 1  | -6.878178000 | -1.922616000 | -2.214555000 | 1  | -4.890441000 | 0.889604000               | 0.758518000  |
| 1  | -5.272173000 | -1.725817000 | -2.950466000 | 1  | -3.429731000 | -2.236495000              | -1.796229000 |
| 1  | -5.531740000 | -2.954370000 | -1.682598000 | 1  | -1.150432000 | -1.906116000              | -0.898289000 |
| 1  | 4.174556000  | -3.993868000 | -2.384623000 | 1  | 2.034098000  | 1.698686000               | 1.967622000  |
| 1  | 5.264197000  | -3.555761000 | -1.041714000 | 1  | 3.984365000  | 3.784632000               | 1.092798000  |
| 1  | 5.044054000  | -5.261256000 | -1.492096000 | 1  | 0.046651000  | 3.736637000               | -2.074004000 |
| 6  | -0.174587000 | 0.001132000  | 2.820659000  | 1  | -0.885385000 | 1.624542000               | -1.188251000 |
| 1  | 0.822921000  | 0.186868000  | 3.218963000  | 1  | 2.116677000  | -0.200136000              | -0.803577000 |
| 1  | -0.851353000 | 0.793662000  | 3.139372000  | 1  | 3.554574000  | -2.103609000              | -1.458672000 |
| 1  | -0.536522000 | -0.958755000 | 3.188899000  | 1  | 1.447245000  | -4.644135000              | 1.285016000  |
|    |              | Pani3Me_2    |              | 1  | 0.015140000  | -2.769232000              | 1.929040000  |
| 15 | -0.082792000 | -0.025570000 | 1.060504000  | 1  | 3.256766000  | 6.600175000               | -1.094922000 |
| 6  | 1.006371000  | -1.339072000 | 0.575763000  | 1  | 2.829348000  | 6.008988000               | 0.526037000  |
| 6  | 0.516184000  | 1.529163000  | 0.451015000  | 1  | 3.964696000  | 5.084505000               | -0.493712000 |
| 6  | -1.711513000 | -0.332196000 | 0.426344000  | 1  | -7.471703000 | -0.553660000              | -1.251089000 |
| 6  | -2.783416000 | 0.424910000  | 0.901512000  | 1  | -6.793215000 | -0.321697000              | 0.375016000  |
| 6  | -4.062610000 | 0.235198000  | 0.404285000  | 1  | -6.465202000 | 0.870992000               | -0.911620000 |
| 6  | -4.277835000 | -0.725663000 | -0.588690000 | 1  | 3.450584000  | -5.739785000              | 1.078674000  |
| 6  | -3.205588000 | -1.481458000 | -1.074623000 | 1  | 2.292203000  | -6.165183000              | -0.210525000 |
| 6  | -1.935283000 | -1.285728000 | -0.572898000 | 1  | 4.037383000  | -6.374247000              | -0.474579000 |
| 6  | 1.603302000  | 2.146092000  | 1.071346000  | 6  | -0.188045000 | 0.055365000               | 2.864622000  |
| 6  | 2.115042000  | 3.338893000  | 0.585834000  | 1  | 0.811404000  | 0.216501000               | 3.268159000  |
| 6  | 1.535863000  | 3.926404000  | -0.542904000 | 1  | -0.842437000 | 0.874237000               | 3.163104000  |
| 6  | 0.448115000  | 3.310178000  | -1.171678000 | 1  | -0.583418000 | -0.885982000              | 3.245726000  |
| 6  | -0.055405000 | 2.123800000  | -0.680077000 |    |              |                           |              |
| 6  | 2.011216000  | -1.138837000 | -0.366003000 | 15 | 0.028825000  | PCy3Me_1<br>-0.088655000  | 0.690263000  |
| 6  | 2.840671000  | -2.183674000 | -0.752720000 | 6  | 0.073642000  | 1.641062000               | 0.143457000  |
| 6  | 2.660493000  | -3.447428000 | -0.189308000 | 6  | -1.303620000 | -0.995271000              | -0.124069000 |
| 6  | 1.644856000  | -3.656556000 | 0.755155000  | 6  | 1.606686000  | -0.887655000              | 0.330678000  |
| 6  | 0.827382000  | -2.615311000 | 1.131662000  | 6  | -2.675776000 | -0.514256000              | 0.364597000  |
| 8  | 1.960809000  | 5.077258000  | -1.084097000 | 6  | -3.781662000 | -1.229808000              | -0.402136000 |
| 8  | -5.478521000 | -0.983883000 | -1.127253000 | 6  | -3.667155000 | -2.736851000              | -0.214585000 |
| 8  | 3.410609000  | -4.516864000 | -0.492123000 | 6  | -2.298271000 | -3.230386000              | -0.662780000 |
| 6  | 3.063434000  | 5.740435000  | -0.486412000 | 6  | -1.173108000 | -2.509313000              | 0.073514000  |
| 6  | -6.600194000 | -0.248424000 | -0.665238000 | 6  | -0.635846000 | 2.598416000               | 1.108288000  |
| 6  | 4.453584000  | -4.366914000 | -1.442033000 | 6  | -0.451103000 | 4.037666000               | 0.638921000  |
| 1  | -2.624135000 | 1.178668000  | 1.664104000  | 6  | -0.959045000 | 4.225817000               | -0.784231000 |
| 1  | -4.878317000 | 0.830013000  | 0.788480000  | 6  | -0.256088000 | 3.264891000               | -1.733602000 |
| 1  | -3.394568000 | -2.217494000 | -1.844629000 | 6  | -0.457786000 | 1.822436000               | -1.284362000 |
| 1  | -1.113116000 | -1.876881000 | -0.956858000 | 6  | 2.788131000  | -0.231772000              | 1.052906000  |
| 1  | 2.064698000  | 1.694895000  | 1.941806000  | 6  | 4.058719000  | -1.037708000              | 0.788959000  |
| 1  | 2.953577000  | 3.801698000  | 1.085378000  | 6  | 4.336501000  | -1.144328000              | -0.704587000 |
| 1  | 0.014252000  | 3.783241000  | -2.042598000 | 6  | 3.150221000  | -1.765869000              | -1.430313000 |
| 1  | -0.898817000 | 1.655824000  | -1.173030000 | 6  | 1.880076000  | -0.962266000              | -1.174302000 |
| 1  | 2.156343000  | -0.159688000 | -0.806071000 | 1  | 1.142167000  | 1.895027000               | 0.145109000  |
| 1  | 3.615338000  | -2.004634000 | -1.483919000 | 1  | -1.207134000 | -0.772066000              | -1.193962000 |
| 1  | 1.522189000  | -4.646180000 | 1.174807000  | 1  | 1.494385000  | -1.906241000              | 0.724820000  |
| 1  | 0.039032000  | -2.788983000 | 1.855500000  | 1  | -2.772859000 | -0.752813000              | 1.429186000  |
| 1  | 3.241851000  | 6.633011000  | -1.078897000 | 1  | -2.769603000 | 0.569249000               | 0.263434000  |
| 1  | 2.836495000  | 6.027186000  | 0.542270000  | 1  | -4.755375000 | -0.871435000              | -0.064613000 |
| 1  | 3.954304000  | 5.109608000  | -0.502604000 | 1  | -3.696498000 | -0.986263000              | -1.466812000 |
| 1  | -7.457735000 | -0.617462000 | -1.220168000 | 1  | -3.806900000 | -2.975068000              | 0.845831000  |

|    |              |              |              |    |              |              |              |
|----|--------------|--------------|--------------|----|--------------|--------------|--------------|
| 1  | -4.454963000 | -3.252290000 | -0.766356000 | 6  | -1.547398000 | -0.756492000 | 0.244490000  |
| 1  | -2.205751000 | -4.306443000 | -0.507342000 | 6  | 1.186194000  | -1.036174000 | -0.803542000 |
| 1  | -2.185217000 | -3.048610000 | -1.737247000 | 6  | 0.217599000  | 1.610568000  | 0.122727000  |
| 1  | -0.208555000 | -2.867198000 | -0.290895000 | 6  | 0.842864000  | -2.507596000 | -1.065678000 |
| 1  | -1.226537000 | -2.733586000 | 1.145321000  | 6  | 1.402063000  | -3.449806000 | -0.010133000 |
| 1  | -1.703525000 | 2.355365000  | 1.138987000  | 6  | 2.914669200  | -3.291243000 | 0.069772000  |
| 1  | -0.244750000 | 2.482579000  | 2.120278000  | 6  | 3.276718000  | -1.859479000 | 0.440717000  |
| 1  | -0.962024000 | 4.715195000  | 1.324925000  | 6  | 2.691656000  | -0.851668000 | -0.547043000 |
| 1  | 0.615688000  | 4.285191000  | 0.674675000  | 6  | -2.110076000 | -0.405587000 | -1.137368000 |
| 1  | -2.036946000 | 4.029978000  | -0.810690000 | 6  | -3.499618000 | -1.009167000 | -1.305102000 |
| 1  | -0.811496000 | 5.257729000  | -1.107015000 | 6  | -4.435705000 | -0.506865000 | -0.214029000 |
| 1  | -0.627453000 | 3.386949000  | -2.752314000 | 6  | -3.872590000 | -0.825585000 | 1.164331000  |
| 1  | 0.816156000  | 3.489135000  | -1.749503000 | 6  | -2.476613000 | -0.235860000 | 1.345677000  |
| 1  | 0.030671000  | 1.133054000  | -1.975652000 | 6  | 0.527544000  | 1.975497000  | -1.333745000 |
| 1  | -1.528265000 | 1.592844000  | -1.299512000 | 6  | 0.380373000  | 3.478751000  | -1.538373000 |
| 1  | 2.924078000  | 0.785433000  | 0.670672000  | 6  | 1.310037000  | 4.242098000  | -0.605469000 |
| 1  | 2.603699000  | -0.163007000 | 2.126176000  | 6  | 1.034982000  | 3.865379000  | 0.843422000  |
| 1  | 4.900082000  | -0.568386000 | 1.303984000  | 6  | 1.166805000  | 2.361675000  | 1.063913000  |
| 1  | 3.937602000  | -2.038804000 | 1.209565000  | 1  | -1.487484000 | -1.848605000 | 0.342476000  |
| 1  | 4.516860000  | -0.142197000 | -1.109516000 | 1  | 0.930123000  | -0.844107000 | -1.713216000 |
| 1  | 5.240394000  | -1.729610000 | -0.881121000 | 1  | -0.806077000 | 1.942319000  | 0.347206000  |
| 1  | 3.341555000  | -1.824040000 | -2.502877000 | 1  | -0.232044000 | -2.642024000 | -1.197166000 |
| 1  | 3.000060000  | -2.789922000 | -1.070847000 | 1  | 1.305383000  | -2.759136000 | -2.025962000 |
| 1  | 1.031375000  | -1.402081000 | -1.704809000 | 1  | 0.956923000  | -3.232649000 | 0.967690000  |
| 1  | 2.015112000  | 0.056520000  | -1.556120000 | 1  | 1.133857000  | -4.477433000 | -0.259999000 |
| 6  | -0.232022000 | -0.176832000 | 2.451404000  | 1  | 3.339886000  | -3.985940000 | 0.795879000  |
| 1  | -1.180606000 | 0.286657000  | 2.717693000  | 1  | 3.346927000  | -3.537535000 | -0.906603000 |
| 1  | -0.243259000 | -1.226453000 | 2.749890000  | 1  | 2.913764000  | -1.664121000 | 1.451955000  |
| 1  | 0.570500000  | 0.339596000  | 2.976164000  | 1  | 4.360270000  | -1.731944000 | 0.468753000  |
|    |              | PCy3Me_2     |              | 1  | 3.190456000  | -0.984531000 | -1.511816000 |
| 15 | -0.075633000 | 0.026669000  | 0.536746000  | 1  | 2.903226000  | 0.172311000  | -0.224481000 |
| 6  | 0.831112000  | -1.509983000 | 0.240881000  | 1  | -2.183428000 | 0.685459000  | -1.216405000 |
| 6  | 0.715015000  | 1.440483000  | -0.267049000 | 1  | -1.442392000 | -0.746822000 | -1.932545000 |
| 6  | -1.757124000 | -0.117404000 | -0.145916000 | 1  | -3.891573000 | -0.764475000 | -2.293473000 |
| 6  | 2.117242000  | 1.706441000  | 0.289075000  | 1  | -3.423864000 | -2.100600000 | -1.246767000 |
| 6  | 2.768955000  | 2.879766000  | -0.434646000 | 1  | -4.549985000 | -0.578367000 | -0.313726000 |
| 6  | 1.909978000  | 4.130977000  | -0.325421000 | 1  | -5.427699000 | -0.946605000 | -0.329618000 |
| 6  | 0.523184000  | 3.866022000  | -0.892938000 | 1  | -4.532606000 | -0.449271000 | 1.947514000  |
| 6  | -0.153638000 | 2.701836000  | -0.176832000 | 1  | -3.813621000 | -1.912635000 | 1.286366000  |
| 6  | 1.964219000  | -1.817084000 | 1.225308000  | 1  | -2.092715000 | -0.495415000 | 2.332995000  |
| 6  | 2.533736000  | -3.198430000 | 0.914321000  | 1  | -2.533479000 | 0.857011000  | 1.285908000  |
| 6  | 3.018381000  | -3.285919000 | -0.527483000 | 1  | 1.559856000  | 1.683950000  | -1.557266000 |
| 6  | 1.888376000  | -2.965366000 | -1.497751000 | 1  | -0.121290000 | 1.432300000  | -2.023493000 |
| 6  | 1.315206000  | -1.583239000 | -1.210507000 | 1  | 0.586787000  | 3.728537000  | -2.580280000 |
| 6  | -2.773600000 | 0.616802000  | 0.741373000  | 1  | -0.656906000 | 3.767209000  | -1.334728000 |
| 6  | -4.144590000 | 0.626007000  | 0.077230000  | 1  | 2.348059000  | 3.992152000  | -0.851778000 |
| 6  | -4.622382000 | -0.795813000 | -0.182040000 | 1  | 1.195547000  | 5.318030000  | -0.747334000 |
| 6  | -3.610011000 | -1.549292000 | -1.032926000 | 1  | 1.712300000  | 4.393817000  | 1.516288000  |
| 6  | -2.227496000 | -1.555113000 | -0.387611000 | 1  | 4.170079000  | 4.100579000  | 1.106521000  |
| 1  | 0.071541000  | -2.288046000 | 0.390858000  | 1  | 0.951066000  | 2.125265000  | 2.105861000  |
| 1  | 0.795242000  | 1.153027000  | -1.323949000 | 1  | 2.197143000  | 2.048638000  | 0.861938000  |
| 1  | -1.704441000 | 0.390368000  | -1.118072000 | 6  | 0.653330000  | -0.469323000 | -2.113992000 |
| 1  | 2.038430000  | 1.940637000  | 1.356688000  | 1  | 1.686859000  | -0.158015000 | 2.257338000  |
| 1  | 2.741486000  | 0.817195000  | 0.190930000  | 1  | 0.019287000  | 0.129335000  | 2.768211000  |
| 1  | 3.764323000  | 3.053800000  | -0.022959000 | 1  | 0.542255000  | -1.522835000 | 2.368393000  |
| 1  | 2.896189000  | 2.620578000  | -1.491393000 |    |              | PBu3Me_1     |              |
| 1  | 1.820584000  | 4.416043000  | 0.728914000  | 15 | 0.000205000  | 0.000170000  | -0.226714000 |
| 1  | 2.382209000  | 4.965577000  | -0.846146000 | 6  | -0.330093000 | -1.656547000 | 0.359866000  |
| 1  | -0.105361000 | 4.754512000  | -0.815322000 | 6  | -1.270119000 | 1.102379000  | 0.380287000  |
| 1  | 0.610986000  | 3.623930000  | -1.957719000 | 6  | 1.596862000  | 0.537850000  | 0.369494000  |
| 1  | -1.137277000 | 2.524976000  | -0.615485000 | 6  | -2.643911000 | 0.870195000  | -0.246705000 |
| 1  | -0.303457000 | 2.961510000  | 0.877779000  | 6  | -3.687692000 | 1.805912000  | 0.349308000  |
| 1  | 2.758738000  | -1.071202000 | 1.137383000  | 6  | -5.057187000 | 1.600111000  | -0.277634000 |
| 1  | 1.597262000  | -1.787307000 | 2.252364000  | 6  | 0.585343000  | -2.725741000 | -0.233042000 |
| 1  | 3.345169000  | -3.424685000 | 1.607863000  | 6  | 0.261281000  | -4.102868000 | 0.331938000  |
| 1  | 1.751284000  | -3.948149000 | 1.076021000  | 6  | 1.151477000  | -5.182595000 | -0.261956000 |
| 1  | 3.832214000  | -2.567238000 | -0.676793000 | 6  | 2.060201000  | 1.870874000  | -0.214485000 |
| 1  | 3.424671000  | -4.277989000 | -0.731120000 | 6  | 3.418330000  | 2.276373000  | 0.343562000  |
| 1  | 2.238955000  | -3.014915000 | -2.529734000 | 6  | 3.895969000  | 3.598509000  | -0.234950000 |
| 1  | 1.093079000  | -3.711242000 | -1.387738000 | 1  | -0.244447000 | -1.626469000 | 1.450088000  |
| 1  | 0.499343000  | -1.346810000 | -1.900438000 | 1  | -1.375691000 | -1.874801000 | 0.123271000  |
| 1  | 2.096351000  | -0.829593000 | -1.359936000 | 1  | -1.305738000 | 0.969512000  | 1.465777000  |
| 1  | -2.841845000 | 0.088203000  | 1.698486000  | 1  | -0.930782000 | 2.124146000  | 0.188699000  |
| 1  | -2.446659000 | 1.634486000  | 0.960822000  | 1  | 1.527216000  | 0.587900000  | 1.460130000  |
| 1  | -4.854166000 | 1.163965000  | 0.707913000  | 1  | 2.309524000  | -0.254728000 | 0.124250000  |
| 1  | -4.078703000 | 1.168101000  | -0.872676000 | 1  | -2.587570000 | 1.032257000  | -1.327048000 |
| 1  | -4.743134000 | -1.312284000 | 0.776711000  | 1  | -2.958479000 | -0.166825000 | -0.095810000 |
| 1  | -5.598611000 | -0.789559000 | -0.669604000 | 1  | -3.739382000 | 1.640584000  | 1.429063000  |
| 1  | -3.936035000 | -2.576556000 | -1.203452000 | 1  | -3.360583000 | 2.839802000  | 0.207209000  |
| 1  | -3.536026000 | -1.067479000 | -2.014144000 | 1  | -5.404622000 | 0.576083000  | -0.125116000 |
| 1  | -1.528589000 | -2.091253000 | -1.031889000 | 1  | -5.799574000 | 2.272832000  | 0.152323000  |
| 1  | -2.269402000 | -2.087133000 | 0.569814000  | 1  | -5.023251000 | 1.782641000  | -1.353799000 |
| 6  | -0.114345000 | 0.311427000  | 2.295030000  | 1  | 0.474235000  | -2.747362000 | -1.320821000 |
| 1  | -0.682970000 | 1.233832000  | 2.506668000  | 1  | 1.631789000  | -2.485180000 | -0.023918000 |
| 1  | -0.647159000 | -0.524626000 | 2.781910000  | 1  | 0.374326000  | 0.077844000  | -1.419336000 |
| 1  | 0.871620000  | 0.392566000  | 2.683660000  | 1  | -0.789713000 | -4.330274000 | 0.132396000  |
|    |              | PCy3Me_3     |              | 1  | 2.203549000  | -4.977064000 | -0.053440000 |
| 15 | 0.156349000  | -0.185373000 | 0.424017000  | 1  | 0.915454000  | -6.165631000 | 0.146041000  |

|    |              |              |              |    |              |              |              |
|----|--------------|--------------|--------------|----|--------------|--------------|--------------|
| 1  | 1.031184000  | -5.232039000 | -1.346218000 | 1  | 2.751172000  | 3.943338000  | -0.014160000 |
| 6  | 2.125904000  | 1.794870000  | -1.303753000 | 1  | 1.815557000  | 5.202826000  | -0.820375000 |
| 1  | 1.329177000  | 2.654107000  | 0.006032000  | 1  | 1.389047000  | 4.697270000  | 0.814990000  |
| 1  | 3.350502000  | 2.344810000  | 1.432856000  | 1  | 1.583923000  | -1.969616000 | -0.961417000 |
| 1  | 4.142581000  | 1.486666000  | 0.124816000  | 1  | 2.258355000  | -0.359563000 | -0.755123000 |
| 1  | 3.986553000  | 3.536902000  | -1.321489000 | 1  | 3.970463000  | -1.278983000 | 0.803868000  |
| 1  | 3.191314000  | 4.400515000  | -0.005255000 | 1  | 3.297668000  | -2.885348000 | 0.600088000  |
| 1  | 4.868886000  | 3.883178000  | 0.166200000  | 1  | 3.821872000  | -2.800026000 | -1.856443000 |
| 6  | 0.000974000  | 0.009318000  | -2.006746000 | 1  | 4.496882000  | -1.183319000 | -1.653059000 |
| 1  | 0.896823000  | -0.492149000 | -2.373653000 | 1  | 5.282774000  | -2.568990000 | -0.895355000 |
| 1  | -0.882440000 | -0.513123000 | -2.374924000 | 6  | -1.075213000 | 0.011498000  | 2.249000000  |
| 1  | -0.011092000 | 1.037692000  | -2.368336000 | 1  | -2.037344000 | 0.504365000  | 2.122668000  |
|    |              | PBu3Me_1     |              | 1  | -1.205294000 | -0.890986000 | 2.846863000  |
| 15 | -0.211239000 | -0.276681000 | 0.573873000  | 1  | -0.389078000 | 0.684485000  | 2.763994000  |
| 6  | 0.232965000  | -1.858781000 | -0.131811000 |    |              |              |              |
| 6  | 0.970031000  | 0.981535000  | 0.111327000  |    |              |              |              |
| 6  | -1.833712000 | 0.197253000  | -0.006402000 |    |              |              |              |
| 6  | 0.586597000  | 2.381321000  | 0.595367000  |    |              |              |              |
| 6  | 1.701936000  | 3.392275000  | 0.343786000  |    |              |              |              |
| 6  | 2.053718000  | 3.538598000  | -1.129463000 |    |              |              |              |
| 6  | 1.683798000  | -2.284830000 | 0.139338000  | 15 | -2.161957000 | 0.0433359000 | 0.113024000  |
| 6  | 2.635127000  | -1.925109000 | -0.995009000 | 6  | -2.429000000 | 1.690469000  | 0.731329000  |
| 6  | 4.062839000  | -2.341336000 | -0.679951000 | 6  | -3.747693000 | -0.649977000 | -0.320722000 |
| 6  | -2.884020000 | -0.901570000 | 0.168125000  | 6  | -1.451137000 | -0.943233000 | 1.408303000  |
| 6  | -4.291540000 | -0.397524000 | -0.136848000 | 1  | -3.096159000 | 1.657320000  | 1.592449000  |
| 6  | -4.453873000 | 0.084056000  | -1.571195000 | 1  | -1.472572000 | 2.120322000  | 1.028121000  |
| 1  | -0.479220000 | -2.569748000 | 0.294630000  | 1  | -3.607113000 | -1.662753000 | -0.698945000 |
| 1  | 0.030040000  | -1.810782000 | -1.205943000 | 1  | -4.211626000 | -0.039437000 | -1.095697000 |
| 1  | 1.938710000  | 0.678407000  | 0.523294000  | 1  | -2.093382000 | -0.898401000 | 2.288369000  |
| 1  | 1.050807000  | 0.945623000  | -0.978044000 | 1  | -1.356018000 | -1.973993000 | 1.070198000  |
| 1  | -2.118813000 | 1.098778000  | 0.545648000  | 1  | -4.398567000 | -0.678589000 | 0.553112000  |
| 1  | -1.718321000 | 0.480349000  | -1.056197000 | 1  | -0.461783000 | -0.554180000 | 1.646441000  |
| 1  | -0.320900000 | 2.705904000  | 0.078439000  | 1  | -2.875464000 | 2.304523000  | -0.051233000 |
| 1  | 0.356341000  | 2.353111000  | 1.663185000  | 6  | -1.055981000 | 0.114213000  | -1.298619000 |
| 1  | 1.387347000  | 4.358589000  | 0.742846000  | 6  | 0.267752000  | 0.690439000  | -0.911177000 |
| 1  | 2.588870000  | 3.092536000  | 0.909261000  | 8  | 1.268132000  | -0.169804000 | -0.489772000 |
| 1  | 2.778285000  | 4.338659000  | -1.282377000 | 8  | 1.192739000  | -1.410444000 | -0.345730000 |
| 1  | 2.489049000  | 2.623044000  | -1.533930000 | 8  | 2.472394000  | 0.458010000  | -0.209574000 |
| 1  | 1.164267000  | 3.775098000  | -1.718794000 | 6  | 3.526857000  | -0.380548000 | 0.224257000  |
| 1  | 2.048951000  | -1.846441000 | 1.074911000  | 6  | 4.732157000  | 0.494299000  | 0.478444000  |
| 1  | 1.706210000  | -3.366160000 | 0.287039000  | 1  | -1.578324000 | 0.689637000  | -2.069253000 |
| 1  | 2.291828000  | -2.418929000 | -1.908335000 | 1  | -0.956733000 | -0.915066000 | -1.660506000 |
| 1  | 2.594793000  | -0.850273000 | -1.190898000 | 1  | 3.233900000  | -0.915586000 | 1.131753000  |
| 1  | 4.120423000  | -3.416031000 | -0.494412000 | 1  | 3.745531000  | -1.135216000 | -0.535888000 |
| 1  | 4.740677000  | -2.105944000 | -1.500623000 | 1  | 5.574444000  | -0.110404000 | 0.816880000  |
| 1  | 4.427947000  | -1.831016000 | 0.214053000  | 1  | 5.028169000  | 1.016606000  | -0.432385000 |
| 1  | -2.645680000 | -1.737225000 | -0.495968000 | 1  | 4.513438000  | 1.239003000  | 1.245125000  |
| 1  | -2.848771000 | -1.285399000 | 1.191190000  | 1  | 0.454027000  | 1.750160000  | -1.013711000 |
| 1  | -4.997817000 | -1.206680000 | 0.059361000  |    |              |              |              |
| 1  | -4.538714000 | 0.410861000  | 0.557241000  | 15 | -1.985767000 | 0.143235000  | 0.023740000  |
| 1  | -3.847062000 | 0.968615000  | -1.772566000 | 6  | -1.070212000 | 1.552917000  | -0.552363000 |
| 1  | -4.154601000 | -0.694940000 | -2.276737000 | 6  | -3.547707000 | 0.093056000  | -0.837194000 |
| 1  | -5.490907000 | 0.345487000  | -1.782719000 | 6  | -2.315451000 | 0.356993000  | 1.759309000  |
| 6  | -0.239159000 | -0.441180000 | 2.345834000  | 1  | -1.623912000 | 2.460398000  | -0.309519000 |
| 1  | -0.558386000 | 0.495943000  | 2.801145000  | 1  | -0.925049000 | 1.481854000  | -1.629032000 |
| 1  | -0.933549000 | -1.233699000 | 2.624869000  | 1  | -4.100953000 | 1.016744000  | -0.667876000 |
| 1  | 0.758530000  | -0.695772000 | 2.703751000  | 1  | -4.134698000 | -0.751228000 | -0.474961000 |
|    |              | PBu3Me_3     |              | 1  | -1.369848000 | 0.407325000  | 2.298853000  |
| 15 | -0.372265000 | -0.435633000 | 0.674798000  | 1  | -2.872963000 | 1.280221000  | 1.916179000  |
| 6  | -0.220606000 | 1.007396000  | -0.368664000 | 1  | -3.366110000 | -0.028679000 | -1.905268000 |
| 6  | -1.352584000 | -1.687877000 | -0.156458000 | 1  | -2.898705000 | -0.487557000 | 2.126844000  |
| 6  | 1.252803000  | -1.113640000 | 0.998442000  | 1  | -0.097198000 | 1.565980000  | -0.060942000 |
| 6  | -2.557343000 | -1.188666000 | -0.954484000 | 6  | -1.044110000 | -1.365729000 | -0.215650000 |
| 6  | -3.627224000 | -0.488736000 | -0.126998000 | 6  | 0.277978000  | -1.277978000 | 0.484735000  |
| 6  | -4.890662000 | -0.253949000 | -0.940413000 | 8  | 1.359495000  | -0.773434000 | -0.208541000 |
| 6  | 0.709773000  | 2.072429000  | 0.209125000  | 8  | 1.371997000  | -0.328635000 | -1.378174000 |
| 6  | 0.814457000  | 3.278386000  | -0.715193000 | 8  | 2.549564000  | -0.801348000 | 0.510806000  |
| 6  | 1.744413000  | 4.342403000  | -0.154727000 | 6  | 3.602739000  | -0.004023000 | -0.000090000 |
| 6  | 2.103789000  | -1.319227000 | -0.251680000 | 6  | 3.381291000  | 1.463929000  | 0.303888000  |
| 6  | 3.456197000  | -1.930310000 | 0.091580000  | 1  | -0.918750000 | -1.481441000 | -1.297566000 |
| 6  | 4.315352000  | -2.133374000 | -1.146056000 | 1  | -1.680132000 | -2.183678000 | 0.136982000  |
| 1  | 0.138003000  | 0.659755000  | -1.343061000 | 1  | 4.509908000  | -0.365002000 | 0.486722000  |
| 1  | -1.228069000 | 1.407653000  | -0.516486000 | 1  | 3.702003000  | -0.160371000 | -1.075206000 |
| 1  | -0.658056000 | -2.212767000 | -0.817927000 | 1  | 3.290001000  | 1.623377000  | 1.379684000  |
| 1  | -1.660273000 | -2.398889000 | 0.615776000  | 1  | 4.214881000  | 2.064917000  | -0.063943000 |
| 1  | 1.748147000  | -0.432157000 | 1.696525000  | 1  | 2.467027000  | 1.809720000  | -0.181724000 |
| 1  | 1.096047000  | -2.058385000 | 1.528209000  | 1  | 0.380089000  | -1.635628000 | 1.499061000  |
| 1  | -2.220314000 | -0.523975000 | -1.754812000 |    |              |              |              |
| 1  | -3.001437000 | -2.058575000 | -1.444790000 | 15 | -2.139220000 | -0.039226000 | 0.013542000  |
| 1  | -3.853665000 | -1.091033000 | 0.758509000  | 6  | -1.501586000 | -1.021378000 | 1.349687000  |
| 1  | -3.248697000 | 0.471966000  | 0.234901000  | 6  | -2.639549000 | 1.541118000  | 0.660506000  |
| 1  | -5.652562000 | 0.267061000  | -0.360421000 | 6  | -3.583240000 | -0.850197000 | -0.649808000 |
| 1  | -4.673338000 | 0.347099000  | -1.826050000 | 1  | -2.250118000 | -1.080819000 | 2.140457000  |
| 1  | -5.313595000 | -1.201918000 | -1.278748000 | 1  | -1.262753000 | -2.020219000 | 0.987998000  |
| 1  | 0.343367000  | 2.394640000  | 1.188377000  | 1  | -1.774060000 | 2.038337000  | 1.097954000  |
| 1  | 1.707275000  | 1.649676000  | 0.366083000  | 1  | -3.403040000 | 1.399782000  | 1.425273000  |
| 1  | 1.170462000  | 2.945229000  | -1.694232000 | 1  | -4.002712000 | -0.244077000 | -1.453150000 |
| 1  | -0.184227000 | 3.695657000  | -0.871216000 | 1  | -4.332666000 | -0.984237000 | 0.130150000  |

## Zwitterions

### 1\_PMe3\_1

|    |              |              |              |
|----|--------------|--------------|--------------|
| 15 | -2.161957000 | 0.0433359000 | 0.113024000  |
| 6  | -2.429000000 | 1.690469000  | 0.731329000  |
| 6  | -3.747693000 | -0.649977000 | -0.320722000 |
| 6  | -1.451137000 | -0.943233000 | 1.408303000  |
| 1  | -3.096159000 | 1.657320000  | 1.592449000  |
| 1  | -1.472572000 | 2.120322000  | 1.028121000  |
| 1  | -3.607113000 | -1.662753000 | -0.698945000 |
| 1  | -4.211626000 | -0.039437000 | -1.095697000 |
| 1  | -2.093382000 | -0.898401000 | 2.288369000  |
| 1  | -1.356018000 | -1.973993000 | 1.070198000  |
| 1  | -4.398567000 | -0.678589000 | 0.553112000  |
| 1  | -0.461783000 | -0.554180000 | 1.646441000  |
| 1  | -2.875464000 | 2.304523000  | -0.051233000 |
| 6  | -1.055981000 | 0.114213000  | -1.298619000 |
| 6  | 0.267752000  | 0.690439000  | -0.911177000 |
| 8  | 1.268132000  | -0.169804000 | -0.489772000 |
| 8  | 1.192739000  | -1.410444000 | -0.345730000 |
| 8  | 2.472394000  | 0.458010000  | -0.209574000 |
| 6  | 3.526857000  | -0.380548000 | 0.224257000  |
| 6  | 4.732157000  | 0.494299000  | 0.478444000  |
| 1  | -1.578324000 | 0.689637000  | -2.069253000 |
| 1  | -0.956733000 | -0.915066000 | -1.660506000 |
| 1  | 3.233900000  | -0.915586000 | 1.131753000  |
| 1  | 3.745531000  | -1.135216000 | -0.535888000 |
| 1  | 5.574444000  | -0.110404000 | 0.816880000  |
| 1  | 5.028169000  | 1.016606000  | -0.432385000 |
| 1  | 4.513438000  | 1.239003000  | 1.245125000  |
| 1  | 0.454027000  | 1.750160000  | -1.013711000 |

### 1\_PMe3\_2

|    |              |              |              |
|----|--------------|--------------|--------------|
| 15 | -1.985767000 | 0.143235000  | 0.023740000  |
| 6  | -1.070212000 | 1.552917000  | -0.552363000 |
| 6  | -3.547707000 | 0.093056000  | -0.837194000 |
| 6  | -2.315451000 | 0.356993000  | 1.759309000  |
| 1  | -1.623912000 | 2.460398000  | -0.309519000 |
| 1  | -0.925049000 | 1.481854000  | -1.629032000 |
| 1  | -4.100953000 | 1.016744000  | -0.667876000 |
| 1  | -4.134698000 | -0.751228000 | -0.474961000 |
| 1  | -1.369848000 | 0.407325000  | 2.298853000  |
| 1  | -2.872963000 | 1.280221000  | 1.916179000  |
| 1  | -3.366110000 | -0.028679000 | -1.905268000 |
| 1  | -2.898705000 | -0.487557000 | 2.126844000  |
| 1  | -0.097198000 | 1.565980000  | -0.060942000 |
| 6  | -1.044110000 | -1.365729000 | -0.215650000 |
| 6  | 0.277978000  | -1.277978000 | 0.48473      |

|    |              |              |              |    |              |              |              |
|----|--------------|--------------|--------------|----|--------------|--------------|--------------|
| 1  | -3.041497000 | 2.154557000  | -0.146248000 | 1  | -1.130349000 | 2.617631000  | 1.042007000  |
| 1  | -3.298284000 | -1.824559000 | -1.047289000 | 1  | -1.239740000 | 1.571589000  | 2.479095000  |
| 1  | -0.593694000 | -0.553447000 | 1.728933000  |    |              | 1_PPhMe2_3   |              |
| 6  | -0.879344000 | 0.206704000  | -1.240422000 | 6  | -0.518558000 | -0.904441000 | -1.249347000 |
| 6  | 0.326961000  | 0.875076000  | -0.663545000 | 6  | -1.884718000 | -1.464204000 | -1.031006000 |
| 6  | 1.339358000  | 0.087538000  | -0.143716000 | 6  | -2.924618000 | -0.681389000 | -0.548986000 |
| 8  | 1.370722000  | -1.161764000 | -0.076877000 | 8  | -4.090748000 | -1.007063000 | -0.256705000 |
| 8  | 2.413790000  | 0.813681000  | 0.357779000  | 8  | -2.555357000 | 0.656180000  | -0.393019000 |
| 6  | 3.570358000  | 0.071170000  | 0.699802000  | 6  | -3.447498000 | 1.468896000  | 0.344797000  |
| 6  | 4.389999000  | -0.280006000 | -0.524939000 | 6  | -2.845080000 | 2.852348000  | 0.424936000  |
| 1  | -1.354876000 | 0.775061000  | -2.045778000 | 1  | -0.519559000 | 0.136455000  | -1.584447000 |
| 1  | -0.639688000 | -0.788218000 | -1.630992000 | 1  | 0.072262000  | -1.475157000 | -1.972509000 |
| 1  | 3.285313000  | -0.833526000 | 1.238905000  | 1  | -3.592763000 | 1.047161000  | 1.345409000  |
| 1  | 4.142820000  | 0.710299000  | 1.374110000  | 1  | -4.426346000 | 1.494183000  | -0.138463000 |
| 1  | 3.805401000  | -0.910664000 | -1.195266000 | 1  | -1.872810000 | 2.823627000  | 0.921719000  |
| 1  | 4.684514000  | 0.623606000  | -1.061330000 | 1  | -2.707751000 | 3.269027000  | -0.573899000 |
| 1  | 5.294318000  | -0.821161000 | -0.240290000 | 1  | -3.497489000 | 3.519600000  | 0.989235000  |
| 1  | 0.415484000  | 1.952191000  | -0.679169000 | 1  | -2.065620000 | -2.515825000 | -1.205552000 |
|    |              | 1_PPhMe2_1   |              | 15 | 0.449650000  | -0.949250000 | 0.276570000  |
| 6  | -0.263679000 | 0.197783000  | -1.358202000 | 6  | 1.999188000  | -0.084283000 | 0.068547000  |
| 6  | -1.692799000 | 0.615147000  | -1.279645000 | 6  | 3.234309000  | -0.726507000 | 0.146219000  |
| 6  | -2.613854000 | -0.282260000 | -0.765198000 | 6  | 4.403037000  | -0.005677000 | -0.067977000 |
| 8  | -2.381988000 | -1.420616000 | -0.301725000 | 6  | 4.341411000  | -1.351054000 | -0.361497000 |
| 8  | -3.925813000 | 0.172315000  | -0.805701000 | 6  | 3.110127000  | 1.994623000  | -0.445013000 |
| 6  | -4.859969000 | -0.552697000 | -0.025308000 | 6  | 1.940817000  | 1.279954000  | -0.233151000 |
| 6  | -4.735092000 | -0.208158000 | 1.444886000  | 1  | 3.289932000  | -1.783590000 | 0.374576000  |
| 1  | 0.293570000  | 0.652747000  | -2.182572000 | 1  | 5.360824000  | -0.505038000 | -0.004303000 |
| 1  | -0.162495000 | -0.889634000 | -1.445042000 | 1  | 5.253720000  | 1.909169000  | -0.527302000 |
| 1  | -4.723269000 | -1.623870000 | -0.179831000 | 1  | 3.062322000  | 3.050524000  | -0.676165000 |
| 1  | -5.843362000 | -0.271135000 | -0.404426000 | 1  | 0.979847000  | 1.780168000  | -0.302408000 |
| 1  | -4.882351000 | 0.861739000  | 1.601981000  | 6  | 0.758922000  | -2.646975000 | 0.703758000  |
| 1  | -5.479657000 | -0.748024000 | 2.032675000  | 1  | 1.318695000  | -2.709080000 | 1.636318000  |
| 1  | -3.743547000 | -0.483890000 | 1.808069000  | 1  | -0.207466000 | -3.102650000 | 0.831056000  |
| 1  | -2.004899000 | 1.579651000  | -1.653991000 | 1  | 1.308810000  | -3.142185000 | -0.096265000 |
| 15 | 0.616970000  | 0.656954000  | 0.145937000  | 6  | -0.423442000 | -0.194968000 | 1.633113000  |
| 2  | 3.00071000   | 0.058854000  | 0.109686000  | 1  | -1.405045000 | -0.661602000 | 1.723431000  |
| 6  | 2.498510000  | -1.324655000 | 0.075769000  | 1  | 0.150263000  | -0.359015000 | 2.545744000  |
| 6  | 3.784368000  | -1.838907000 | 0.002288000  | 1  | -0.541125000 | 0.873223000  | 1.456709000  |
| 6  | 4.875832000  | -0.976398000 | -0.041190000 |    |              | 1_PPh2Me_1   |              |
| 6  | 4.681928000  | 0.399240000  | -0.013317000 | 6  | 0.437952000  | -0.823370000 | -1.238983000 |
| 6  | 3.395644000  | 0.919994000  | 0.060331000  | 6  | 1.814583000  | -0.269229000 | -1.113473000 |
| 1  | 1.646858000  | -1.995950000 | 0.107634000  | 6  | 2.776786000  | -1.014484000 | -0.448264000 |
| 1  | 3.936129000  | -2.909895000 | -0.021583000 | 8  | 2.623925000  | -2.119932000 | 0.115460000  |
| 1  | 5.878965000  | -1.378653000 | -0.097866000 | 8  | 4.031546000  | -0.429015000 | -0.434823000 |
| 1  | 5.531209000  | 1.068918000  | -0.047748000 | 6  | 5.057361000  | -1.162288000 | 0.209894000  |
| 1  | 3.250604000  | 1.992686000  | 0.081604000  | 6  | 6.352243000  | -0.135202000 | 0.112502000  |
| 6  | -0.194343000 | -0.032686000 | 1.570417000  | 1  | 0.429469000  | -1.917785000 | -1.200154000 |
| 1  | 0.292543000  | 0.340991000  | 2.471300000  | 1  | -0.077597000 | -0.509348000 | -2.149860000 |
| 1  | -1.241447000 | 0.271905000  | 1.551803000  | 1  | 5.178810000  | -2.138409000 | -0.267163000 |
| 1  | -0.138189000 | -1.119372000 | 1.538438000  | 1  | 4.789938000  | -1.346240000 | 1.253893000  |
| 6  | 0.619950000  | 2.427715000  | 0.303652000  | 1  | 6.597259000  | -0.180461000 | -0.930746000 |
| 1  | 1.134409000  | 2.725852000  | 1.216496000  | 1  | 6.207497000  | 0.616346000  | 0.599581000  |
| 1  | 1.101754000  | 2.882607000  | -0.561659000 | 1  | 7.151423000  | -0.879789000 | 0.596895000  |
| 1  | -0.418381000 | 2.757596000  | 0.350058000  | 1  | 2.064730000  | 0.678319000  | -1.568663000 |
|    |              | 1_PPhMe2_2   |              | 15 | -0.583301000 | -0.277160000 | 0.152729000  |
| 6  | 0.238155000  | 0.670969000  | -0.971224000 | 6  | -0.696693000 | 1.506186000  | 0.123738000  |
| 6  | 1.652892000  | 0.984037000  | -0.619436000 | 6  | -2.237410000 | -0.956597000 | 0.088635000  |
| 2  | 2.569104000  | -0.054845000 | -0.555795000 | 6  | -2.827473000 | -1.216136000 | -1.150368000 |
| 8  | 2.349534000  | -1.272960000 | -0.732824000 | 6  | -4.110938000 | -1.742880000 | -1.210747000 |
| 8  | 3.861039000  | 0.351219000  | -0.263655000 | 6  | -4.806182000 | -2.014896000 | -0.038270000 |
| 6  | 4.836683000  | -0.672691000 | -0.195949000 | 6  | -4.220741000 | -1.760937000 | 1.197503000  |
| 6  | 6.160383000  | -0.021990000 | 0.130826000  | 6  | -1.232909000 | 1.263777000  | 1.263777000  |
| 1  | 0.160479000  | -0.227841000 | -1.591619000 | 6  | -1.737915000 | 2.133024000  | -0.562600000 |
| 1  | -0.281842000 | 1.481778000  | -1.491390000 | 6  | -1.783621000 | 3.518192000  | -0.637730000 |
| 1  | 4.888625000  | -1.206973000 | -1.148216000 | 6  | -0.792817000 | 4.280580000  | -0.028462000 |
| 1  | 4.561395000  | -1.405006000 | 0.567919000  | 6  | 0.244723000  | 3.659903000  | 0.657272000  |
| 1  | 6.436511000  | 0.697972000  | -0.640788000 | 6  | 0.297137000  | 2.274042000  | 0.734933000  |
| 1  | 6.107126000  | 0.502255000  | 1.086088000  | 1  | -2.289220000 | -1.007784000 | -2.066692000 |
| 1  | 6.946620000  | -0.775170000 | 0.195361000  | 1  | -4.565013000 | -1.943637000 | -2.172058000 |
| 1  | 1.960784000  | 2.005342000  | -0.445315000 | 1  | -5.805175000 | -2.428298000 | -0.087007000 |
| 15 | -0.726591000 | 0.330557000  | 0.514004000  | 1  | -4.761112000 | -1.976274000 | 2.109864000  |
| 6  | -0.684683000 | 1.769460000  | 1.562685000  | 1  | -2.486826000 | -1.039096000 | 2.228384000  |
| 6  | -2.434875000 | -0.015527000 | 0.120364000  | 1  | -2.515575000 | 1.543021000  | -1.032609000 |
| 6  | -3.181011000 | 0.989852000  | -0.501468000 | 1  | -2.593726000 | 4.001297000  | -1.167819000 |
| 6  | -4.498230000 | 0.753989000  | -0.865023000 | 1  | -0.831642000 | 5.360692000  | -0.085729000 |
| 6  | -5.075814000 | -0.486845000 | -0.612748000 | 1  | 1.014858000  | 4.253046000  | 1.132344000  |
| 6  | -4.336171000 | -1.490471000 | 0.000712000  | 1  | 1.108155000  | 1.794051000  | 1.267443000  |
| 6  | -3.015735000 | -1.259065000 | 0.367001000  | 6  | 0.175145000  | -0.774608000 | 1.682510000  |
| 1  | -2.729375000 | 1.955716000  | -0.699441000 | 1  | 0.082035000  | -1.854589000 | 1.789255000  |
| 1  | -5.073411000 | 1.534899000  | -1.344629000 | 1  | 1.232354000  | -0.515018000 | 1.642782000  |
| 1  | -6.104035000 | -0.670590000 | -0.896082000 | 1  | -0.303411000 | -0.269195000 | 2.520831000  |
| 1  | -4.785874000 | -2.455223000 | 0.195369000  |    |              | 1_PPh2Me_2   |              |
| 1  | -2.445526000 | -2.046001000 | 0.843825000  | 6  | -0.022542000 | -2.072358000 | 0.217971000  |
| 6  | -0.029068000 | -1.039266000 | 1.401552000  | 6  | -1.346487000 | -2.321681000 | -0.428218000 |
| 1  | -0.064902000 | -1.940649000 | 0.792604000  | 6  | -2.498260000 | -1.642700000 | -0.047048000 |
| 1  | 1.013516000  | -0.798553000 | 1.609644000  | 8  | -3.629054000 | -1.674026000 | -0.569124000 |
| 1  | -0.569873000 | -1.187744000 | 2.336232000  | 8  | -2.314028000 | -0.850775000 | 1.081285000  |
| 1  | 0.354370000  | 1.996509000  | 1.802120000  | 6  | -3.403934000 | -0.030290000 | 1.458838000  |

|    |              |              |              |    |               |               |              |
|----|--------------|--------------|--------------|----|---------------|---------------|--------------|
| 6  | -3.029742000 | 0.667847000  | 2.745684000  | 1  | -0.458403000  | -1.003919000  | -2.051798000 |
| 1  | 0.658070000  | -2.928571000 | 0.180112000  | 1  | -5.204881000  | -0.702348000  | -1.997353000 |
| 1  | -0.111935000 | -1.759789000 | 1.259699000  | 1  | -5.904229000  | 0.873809000   | -1.594018000 |
| 1  | -4.302975000 | -0.636286000 | 1.589559000  | 1  | -4.404009000  | -0.944487000  | 0.355150000  |
| 1  | -3.614497000 | 0.694816000  | 0.666164000  | 1  | -5.139660000  | -0.615259000  | 0.766834000  |
| 1  | -2.842892000 | -0.059637000 | 3.537149000  | 1  | -6.164676000  | -0.753123000  | 0.305532000  |
| 1  | -2.129090000 | 1.269736000  | 2.611710000  | 1  | -1.602108000  | 1.819522000   | -1.454826000 |
| 1  | -3.837835000 | 1.325771000  | 3.068168000  | 15 | 0.715949000   | -0.003783000  | -0.264222000 |
| 1  | -1.395158000 | -2.950054000 | -1.307308000 | 6  | -0.166972000  | -0.800419000  | 1.061360000  |
| 15 | 0.797359000  | -0.736821000 | -0.681997000 | 6  | 2.242278000   | -0.881973000  | -0.586280000 |
| 6  | -0.229406000 | 0.720697000  | -0.728367000 | 6  | 1.088369000   | 1.665741000   | 0.260548000  |
| 6  | 2.383949000  | -0.274714000 | 0.005579000  | 6  | 2.704438000   | -1.881469000  | 0.270676000  |
| 6  | 3.156715000  | 0.699346000  | -0.631974000 | 6  | 3.873571000   | -2.567529000  | -0.032181000 |
| 6  | 4.392255000  | 1.051180000  | -0.111385000 | 6  | 4.581829000   | -2.263298000  | -1.188305000 |
| 6  | 4.859014000  | 0.433683000  | 1.046514000  | 6  | 4.122194000   | -1.271657000  | -2.048557000 |
| 6  | 4.091858000  | -0.532661000 | 1.683926000  | 6  | 2.954960000   | -0.582809000  | -1.752747000 |
| 6  | 2.851580000  | -0.889257000 | 1.165736000  | 6  | 0.076162000   | 2.404712000   | 0.882017000  |
| 6  | -0.087528000 | 1.701630000  | 0.253451000  | 6  | 0.310078000   | 3.721270000   | 1.251901000  |
| 6  | -0.936017000 | 2.800409000  | 0.260337000  | 6  | 1.550819000   | 4.302477000   | 1.011513000  |
| 6  | -1.924820000 | 2.920813000  | -0.710727000 | 6  | 2.561402000   | 3.566878000   | 0.404285000  |
| 6  | -2.067102000 | 1.944754000  | -1.690848000 | 6  | 2.333953000   | 2.249175000   | 0.028189000  |
| 6  | -1.220596000 | 0.843644000  | -1.703233000 | 6  | -1.228429000  | -1.659689000  | 0.776853000  |
| 1  | 2.785927000  | 1.182277000  | -1.529274000 | 6  | -1.871218000  | -2.315488000  | -1.820308000 |
| 1  | 4.990925000  | 1.805674000  | -0.604412000 | 6  | -1.458541000  | -2.117208000  | 3.132920000  |
| 1  | 5.823878000  | 0.709761000  | 1.451721000  | 6  | -0.402040000  | -1.256608000  | 3.414861000  |
| 1  | 4.455530000  | -1.009582000 | 2.584394000  | 6  | 0.242399000   | -0.528766000  | -0.302102000 |
| 1  | 2.254498000  | -1.642457000 | 1.664561000  | 1  | 2.151854000   | -2.130410000  | 1.167467000  |
| 1  | 0.679334000  | 1.064183000  | 1.013178000  | 1  | 4.3227381000  | -3.342529000  | 0.634755000  |
| 1  | -0.826457000 | 3.559937000  | 1.023390000  | 1  | 5.491135000   | -2.801587000  | -1.422207000 |
| 1  | -2.586422000 | 3.777538000  | -0.702903000 | 1  | 4.670393000   | -1.035908000  | -2.951032000 |
| 1  | -2.838463000 | 2.037380000  | -2.443904000 | 1  | 2.603873000   | 0.189934000   | -2.426226000 |
| 1  | -1.340824000 | 0.080545000  | -2.461474000 | 1  | -0.885720000  | 1.946611000   | 1.077694000  |
| 6  | 1.084735000  | -1.286838000 | -2.353078000 | 1  | -0.474483000  | 4.290660000   | 1.732266000  |
| 1  | 1.795399000  | -2.113489000 | -2.325901000 | 1  | 1.731844000   | 5.328388000   | 1.305051000  |
| 1  | 0.149390000  | -1.628342000 | -2.794722000 | 1  | 3.529942000   | 4.015242000   | 0.226600000  |
| 1  | 1.495835000  | -0.470135000 | -2.946184000 | 1  | 3.129301000   | 1.680062000   | -0.435074000 |
|    |              | 1_PPh2Me_3   |              | 1  | -1.574938000  | -1.794843000  | -0.242510000 |
| 6  | -0.587024000 | -0.402438000 | -1.386989000 | 1  | -2.700425000  | -2.976792000  | 1.604450000  |
| 6  | -1.870663000 | -1.083917000 | -1.083915000 | 1  | -1.964854000  | -2.962978000  | 3.940750000  |
| 6  | -2.874240000 | -0.311014000 | -0.529332000 | 1  | -0.084762000  | -1.099121000  | 4.437178000  |
| 8  | -2.794945000 | 0.910285000  | -0.244463000 | 1  | 1.060507000   | 1.084778000   | 2.596836000  |
| 8  | -4.057265000 | -0.976471000 | -0.277950000 |    |               | 1_PPh3_2      |              |
| 6  | -5.108602000 | -0.200803000 | 0.270677000  | 6  | 0.235954000   | -0.133744000  | -1.902902000 |
| 6  | -6.303303000 | -1.108187000 | 0.446475000  | 6  | 1.113648000   | -1.333541000  | -1.861958000 |
| 1  | -0.743060000 | 0.604367000  | -1.789080000 | 6  | 2.451121000   | -1.271858000  | -1.481629000 |
| 1  | 0.035298000  | -0.951506000 | -2.096969000 | 8  | 3.252303000   | -2.121640000  | -1.322169000 |
| 1  | -5.345542000 | 0.633580000  | -0.394279000 | 8  | 2.907337000   | 0.024447000   | -1.271873000 |
| 1  | -4.799194000 | 0.228055000  | 1.227578000  | 6  | 4.250499000   | 0.151506000   | -0.842119000 |
| 1  | -6.615957000 | -1.523924000 | -0.512286000 | 6  | 4.522872000   | 1.620185000   | -0.617509000 |
| 1  | -6.065278000 | -1.934289000 | 1.117982000  | 1  | -0.5438846000 | -0.154783000  | -2.670483000 |
| 1  | -7.140662000 | -0.551890000 | 0.869364000  | 1  | 0.802639000   | 0.788107000   | -2.046309000 |
| 1  | -1.998087000 | -2.142942000 | -1.254722000 | 1  | 4.926211000   | -0.262094000  | -1.595238000 |
| 15 | 0.479359000  | -0.135968000 | 0.083267000  | 1  | 4.403680000   | -0.420478000  | 0.077081000  |
| 1  | 1.857028000  | 1.271580000  | 0.066902000  | 1  | 5.550163000   | 1.767952000   | -0.282147000 |
| 6  | 1.109281000  | 1.538280000  | 0.082982000  | 1  | 4.377622000   | 2.186136000   | -1.538973000 |
| 6  | 0.163562000  | 2.561534000  | -0.041249000 | 1  | 3.851436000   | 2.022040000   | 0.143890000  |
| 6  | 0.579476000  | 3.885395000  | -0.022761000 | 1  | 0.676847000   | -2.314184000  | -1.998108000 |
| 6  | 1.930578000  | 4.189511000  | 0.112932000  | 15 | -0.626018000  | 0.057543000   | -0.313592000 |
| 6  | 2.869439000  | 3.171699000  | 0.235721000  | 6  | -1.615239000  | -1.397600000  | -0.010566000 |
| 6  | 2.462248000  | 1.843343000  | 0.222930000  | 6  | 0.571882000   | 0.211346000   | 0.998900000  |
| 6  | 2.656154000  | -1.324663000 | -1.079222000 | 6  | -1.703853000  | 1.489790000   | -0.318346000 |
| 6  | 3.733987000  | -2.194547000 | -1.132908000 | 6  | 0.866555000   | 1.453483000   | 1.560942000  |
| 6  | 4.014290000  | -3.019449000 | -0.046882000 | 6  | 1.888709000   | 1.564495000   | 2.494752000  |
| 6  | 3.218968000  | -2.973279000 | 1.090974000  | 6  | 2.619071000   | 0.440307000   | 2.863247000  |
| 6  | 2.139785000  | -2.099227000 | 1.151868000  | 6  | 2.315886000   | -0.802770000  | 2.316483000  |
| 1  | -0.888060000 | 2.307846000  | -0.146771000 | 6  | 1.288839000   | -0.923335000  | 1.391227000  |
| 1  | -0.149636000 | 4.679425000  | -0.117159000 | 6  | -2.992805000  | 1.442964000   | 0.214483000  |
| 1  | 2.252272000  | 5.222922000  | 0.122929000  | 6  | -3.802339000  | 2.570336000   | 0.168804000  |
| 1  | 3.919433000  | 3.410282000  | 0.343263000  | 6  | -3.331981000  | 3.743611000   | -0.409594000 |
| 1  | 3.194675000  | 1.052162000  | 0.324406000  | 6  | -2.050046000  | 3.793688000   | -0.946559000 |
| 1  | 2.433975000  | -0.681414000 | -1.923986000 | 6  | -1.236636000  | 2.670071000   | -0.905608000 |
| 1  | 4.352951000  | -2.232051000 | -2.019462000 | 6  | -1.920429000  | -1.774389000  | 1.298391000  |
| 1  | 4.853765000  | -3.701141000 | -0.090814000 | 6  | -2.748557000  | -2.864485000  | 1.529812000  |
| 1  | 3.435993000  | -3.617380000 | 1.932783000  | 6  | -3.269907000  | -3.579734000  | 0.457841000  |
| 1  | 1.523071000  | -2.068625000 | 2.040811000  | 6  | -2.968793000  | -2.205275000  | -0.847327000 |
| 6  | -0.443848000 | -0.362449000 | 1.585272000  | 6  | -2.143933000  | -2.114736000  | -1.084934000 |
| 1  | -1.295887000 | 0.317621000  | 1.546565000  | 1  | 0.304667000   | 3.32754000    | 1.272548000  |
| 1  | -0.804874000 | -1.388114000 | 1.649736000  | 1  | 2.115601000   | 2.528643000   | 2.930407000  |
| 1  | 0.189389000  | -0.123219000 | 2.439561000  | 1  | 3.420447000   | 0.530757000   | 3.585377000  |
|    |              | 1_PPh3_1     |              | 1  | 2.877635000   | -1.679630000  | 2.610478000  |
| 6  | -0.286121000 | 0.040401000  | -1.771814000 | 1  | 1.049297000   | -1.889587000  | 0.966395000  |
| 6  | -1.579672000 | 0.745952000  | -1.580655000 | 1  | -3.365855000  | 0.529209000   | 0.659738000  |
| 6  | -2.765656000 | 0.039591000  | -1.697912000 | 1  | -4.801391000  | 2.530360000   | 0.582305000  |
| 8  | -2.914968000 | -1.187947000 | -1.893119000 | 1  | -3.966407000  | 4.619720000   | -0.445424000 |
| 8  | -3.895331000 | 0.840253000  | -1.597549000 | 1  | -1.684365000  | 4.705295000   | -1.400167000 |
| 6  | -5.114496000 | 0.164805000  | -1.341750000 | 1  | -0.237806000  | 2.713511000   | -1.323906000 |
| 6  | -5.213745000 | -0.253869000 | 0.111124000  | 1  | -1.511621000  | -1.217233000  | 2.132815000  |
| 1  | 0.376707000  | 0.472213000  | -2.531067000 | 1  | -2.982339000  | -3.1560986000 | 2.545099000  |

|    |              |              |               |    |              |              |              |
|----|--------------|--------------|---------------|----|--------------|--------------|--------------|
| 1  | -3.910303000 | -4.433075000 | 0.639646000   | 1  | 0.345053000  | -2.506017000 | -2.316288000 |
| 1  | -3.372092000 | -3.764824000 | -1.680778000  | 1  | 4.568649000  | -1.085519000 | -0.927648000 |
| 1  | -1.910190000 | -1.829941000 | -2.103016000  | 1  | 4.809779000  | -1.003781000 | -2.668453000 |
|    |              | 1_PPh3_3     |               | 1  | 5.908081000  | 0.928162000  | -1.532052000 |
| 6  | 0.025822000  | 0.016706000  | -2.087151000  | 1  | 4.604678000  | 1.494915000  | -2.585589000 |
| 6  | 1.405062000  | -0.511121000 | -2.154458000  | 1  | 4.353456000  | 1.410029000  | -0.835402000 |
| 6  | 2.362197000  | 0.251553000  | -1.506234000  | 1  | 1.209081000  | -2.121224000 | 0.575146000  |
| 8  | 2.151127000  | 1.370021000  | -0.979768000  | 1  | 3.356677000  | -2.116777000 | 1.801038000  |
| 8  | 3.620196000  | -0.301366000 | -1.431860000  | 1  | 3.218106000  | 2.166889000  | 2.027214000  |
| 6  | 4.552433000  | 0.377039000  | -0.606333000  | 1  | 1.104490000  | 2.167347000  | 0.800824000  |
| 6  | 5.757325000  | -0.519001000 | -0.445935000  | 1  | 0.170109000  | 2.610749000  | -1.642112000 |
| 1  | -0.677027000 | -0.537240000 | -2.710958000  | 1  | -1.014324000 | 4.772198000  | -1.542612000 |
| 1  | -0.037488000 | 1.075076000  | -2.361330000  | 1  | -4.029148000 | 3.008770000  | 0.949307000  |
| 1  | 4.095510000  | 0.596205000  | 0.362921000   | 1  | -2.864134000 | 0.863952000  | 0.849930000  |
| 1  | 4.830709000  | 1.333296000  | -1.058105000  | 1  | -2.136742000 | -1.798741000 | -1.993727000 |
| 1  | 6.511578000  | -0.031707000 | 0.172989000   | 1  | -3.704307000 | -3.502351000 | -1.295242000 |
| 1  | 5.472746000  | -1.458079000 | 0.032648000   | 1  | -2.640919000 | -2.828691000 | 2.807267000  |
| 1  | 6.202775000  | -0.747807000 | -1.415042000  | 1  | -1.044036000 | -1.075870000 | -2.102924000 |
| 1  | 1.602086000  | -1.529219000 | -2.457023000  | 1  | 6.212670000  | 0.823515000  | 3.443233000  |
| 15 | -0.713511000 | -0.014549000 | -0.381194000  | 1  | 5.481970000  | 1.742619000  | 2.107944000  |
| 6  | -1.471722000 | 1.559651000  | -0.002140000  | 1  | 4.679976000  | 1.685400000  | 3.700443000  |
| 6  | -2.002951000 | -1.259920000 | -0.316302000  | 1  | -5.473419000 | -5.656194000 | 0.943725000  |
| 6  | 0.496489000  | -0.418428000 | 0.862891000   | 1  | -5.551991000 | -4.303034000 | -0.206147000 |
| 6  | -2.934192000 | -1.307105000 | -1.358199000  | 1  | -4.243522000 | -5.508241000 | -0.331123000 |
| 6  | -3.980436000 | -2.216567000 | -1.315319000  | 1  | -5.154443000 | 4.783390000  | 0.046683000  |
| 6  | -4.103162000 | -3.084693000 | -0.234871000  | 1  | -4.212939000 | 5.231855000  | 1.492908000  |
| 6  | -3.184401000 | -3.036551000 | 0.806068000   | 1  | -4.651772000 | 6.470236000  | 0.294259000  |
| 6  | -2.137019000 | -2.123823000 | 0.770250000   |    |              | 1_Pani3_2    |              |
| 6  | 1.175000000  | -1.634069000 | 0.746602000   | 6  | -0.155894000 | 0.196657000  | 2.456845000  |
| 6  | 2.172760000  | -1.958031000 | 1.658005000   | 6  | -1.549065000 | -0.225254000 | 2.724288000  |
| 6  | 2.484697000  | -1.076400000 | 2.686794000   | 6  | -2.540317000 | 2.599167000  | 2.255081000  |
| 6  | 1.794323000  | 0.125282000  | 2.815347000   | 8  | -2.345547000 | 1.681183000  | 1.620480000  |
| 6  | 0.803718000  | 0.458218000  | 1.901878000   | 8  | -3.835000000 | 0.165015000  | 2.438284000  |
| 6  | -0.725649000 | 2.716530000  | -0.249972000  | 6  | -4.867435000 | 0.939703000  | 1.851405000  |
| 6  | -1.275140000 | 3.959681000  | 0.032070000   | 6  | -5.034496000 | 0.623623000  | 0.379690000  |
| 6  | -2.561309000 | 4.051497000  | 0.554311000   | 15 | 0.396591000  | 0.033574000  | 0.695245000  |
| 6  | -3.301545000 | 2.900867000  | 0.802350000   | 6  | 1.622738000  | -1.261385000 | 0.584183000  |
| 6  | -2.759785000 | 1.652265000  | 0.525820000   | 6  | -0.937024000 | -0.382469000 | -0.399672000 |
| 1  | -2.851298000 | -0.626368000 | -2.197763000  | 6  | 1.161210000  | 1.550907000  | 0.161024000  |
| 1  | -4.698244000 | -2.248471000 | -2.124256000  | 6  | 2.671005000  | -1.284802000 | 1.516449000  |
| 1  | -4.917549000 | -3.796912000 | -0.2046663000 | 6  | 3.669004000  | -2.231021000 | 1.428279000  |
| 1  | -3.281153000 | -3.707813000 | 1.649124000   | 6  | 3.643886000  | -3.184527000 | 0.402766000  |
| 1  | -1.428533000 | -2.085151000 | 1.587597000   | 6  | 2.611604000  | -3.168891000 | -0.534219000 |
| 1  | 0.917021000  | -2.324659000 | -0.046159000  | 6  | 1.613942000  | -2.205682000 | -0.437961000 |
| 1  | 2.701986000  | -2.897324000 | 1.564858000   | 6  | -1.263583000 | 0.410972000  | -1.503548000 |
| 1  | 3.263731000  | -1.328760000 | 3.394893000   | 6  | -2.306947000 | 0.056138000  | -2.334903000 |
| 1  | 2.032918000  | 0.806681000  | 3.621216000   | 6  | -3.055343000 | -1.095276000 | -2.068795000 |
| 1  | 0.282644000  | 1.403148000  | 1.989814000   | 6  | -2.728642000 | -1.905329000 | -0.980430000 |
| 1  | 0.281369000  | 2.622004000  | -0.643987000  | 6  | -1.673695000 | -1.541646000 | -0.153466000 |
| 1  | -0.699989000 | 4.856561000  | -0.157102000  | 6  | 0.483622000  | 2.757361000  | 0.397726000  |
| 1  | -2.988252000 | 5.022828000  | 0.768692000   | 6  | 1.033836000  | 3.952901000  | -0.014498000 |
| 1  | -4.301072000 | 2.974315000  | 1.210225000   | 6  | 2.273316000  | 3.970810000  | -0.665733000 |
| 1  | -3.337494000 | 0.756929000  | 0.719515000   | 6  | 2.953416000  | 2.776129000  | -0.905049000 |
|    |              | 1_Pani3_1    |               | 6  | 2.390775000  | 1.575156000  | -0.490869000 |
| 6  | 0.176575000  | -0.288675000 | -2.199702000  | 8  | 4.651704000  | -4.074301000 | 0.395053000  |
| 6  | 0.908631000  | -1.582547000 | -2.278068000  | 8  | 2.737457000  | 5.180821000  | -1.026383000 |
| 6  | 2.286967000  | -1.684087000 | -2.119947000  | 8  | -4.078346000 | -1.346546000 | -2.907468000 |
| 8  | 2.983768000  | -2.716375000 | -2.073769000  | 6  | 4.668741000  | -5.059971000 | -0.622865000 |
| 8  | 2.930230000  | -0.455056000 | -2.013071000  | 6  | 3.994751000  | 5.251975000  | -1.674903000 |
| 6  | 4.332407000  | -0.502537000 | -1.822307000  | 6  | -4.895480000 | -2.473640000 | -2.648254000 |
| 6  | 4.828267000  | 0.918083000  | -1.686773000  | 1  | 0.003517000  | 1.260389000  | 2.665911000  |
| 15 | -0.391998000 | 0.019675000  | -0.500874000  | 1  | 0.5076443000 | -0.370918000 | 3.033845000  |
| 6  | 1.015422000  | 0.028926000  | 0.582643000   | 1  | -1.773771000 | -1.192648000 | 3.149192000  |
| 6  | -1.258766000 | 1.577462000  | -0.391086000  | 1  | -5.773539000 | 0.690113000  | 2.405530000  |
| 6  | -1.479885000 | -1.293661000 | 0.001720000   | 1  | -4.658197000 | 2.001549000  | 1.990174000  |
| 6  | 1.651097000  | -1.183937000 | 0.888242000   | 1  | -5.851102000 | 1.208741000  | -0.048052000 |
| 6  | 2.848521000  | -1.189302000 | 1.571360000   | 1  | -5.257944000 | -0.436470000 | -0.237353000 |
| 6  | 3.436049000  | 0.017492000  | 1.968723000   | 1  | -4.114370000 | 0.862446000  | -0.155014000 |
| 6  | 2.791241000  | 1.227166000  | 1.707620000   | 1  | 2.711748000  | -0.547838000 | 2.310454000  |
| 6  | 1.588771000  | 1.222077000  | 1.012333000   | 1  | 4.481504000  | -2.256168000 | -2.142457000 |
| 6  | -0.748060000 | 2.693138000  | -1.072418000  | 1  | 2.576076000  | -3.892963000 | -1.335265000 |
| 6  | -1.401097000 | 3.906519000  | -1.021290000  | 1  | 0.821612000  | -2.197998000 | -1.175860000 |
| 6  | -2.588092000 | 4.034886000  | -0.290706000  | 1  | -0.702195000 | 1.313693000  | -1.710071000 |
| 6  | -3.110879000 | 2.931918000  | 0.385173000   | 1  | -2.574812000 | 0.665916000  | -3.187718000 |
| 6  | -2.443950000 | 1.714917000  | 0.327844000   | 1  | -3.287830000 | -2.804507000 | -0.755580000 |
| 6  | -2.239895000 | -1.986808000 | -0.938003000  | 1  | -1.413613000 | -2.179046000 | 0.682352000  |
| 6  | -3.133812000 | -2.973402000 | -0.545728000  | 1  | -0.482568000 | 2.732046000  | 0.893079000  |
| 6  | -3.275266000 | -3.272729000 | 0.810519000   | 1  | 0.524174000  | 4.892087000  | 0.157336000  |
| 6  | -2.518905000 | -2.578756000 | 1.761612000   | 1  | 3.910247000  | 2.770638000  | -1.406647000 |
| 6  | -1.630296000 | -1.603413000 | 1.359585000   | 1  | 2.924303000  | 0.651793000  | -0.681490000 |
| 8  | 4.618280000  | -0.078036000 | 2.603859000   | 1  | 5.548686000  | -5.671292000 | -0.444130000 |
| 8  | -4.109960000 | -4.212617000 | 1.285950000   | 1  | 3.776117000  | -5.687408000 | -0.576272000 |
| 8  | -3.160601000 | 5.251225000  | -0.297028000  | 1  | 4.740634000  | -4.601808000 | -1.611591000 |
| 6  | 5.274956000  | 1.118769000  | 2.980861000   | 1  | 4.180037000  | 6.303911000  | -1.872931000 |
| 6  | -4.883652000 | -4.955579000 | 0.359505000   | 1  | 4.788369000  | 4.878541000  | -1.035967000 |
| 6  | -4.363647000 | 5.431686000  | 0.429720000   | 1  | 3.982012000  | 4.703068000  | -2.618854000 |
| 1  | 0.817800000  | 0.559224000  | -2.449872000  | 1  | -5.668359000 | -2.476499000 | -3.411765000 |
| 1  | -0.708842000 | -0.218030000 | -2.839586000  | 1  | -4.321069000 | -3.400420000 | -2.712156000 |



|    |              |              |              |    |              |              |              |
|----|--------------|--------------|--------------|----|--------------|--------------|--------------|
| 1  | -5.360677000 | -2.401666000 | -1.662157000 | 6  | -1.211450000 | 3.927970000  | 0.684091000  |
|    |              | 1_Pani3_3    |              | 6  | -0.977787000 | 2.696195000  | -0.182649000 |
| 6  | 0.029169000  | 0.063044000  | -2.453877000 | 1  | -0.275131000 | 0.936426000  | -2.417894000 |
| 6  | -1.169762000 | -0.739434000 | -2.785093000 | 1  | 0.362874000  | -0.701447000 | -2.342767000 |
| 6  | -2.381992000 | -0.233905000 | -2.351931000 | 1  | 1.854243000  | 1.863459000  | -1.481538000 |
| 8  | -2.542512000 | 0.863632000  | -1.765222000 | 1  | 4.985927000  | -0.920500000 | -0.163632000 |
| 8  | -3.480377000 | -1.031103000 | -2.613204000 | 1  | 5.277897000  | -0.807871000 | -1.893341000 |
| 6  | -4.733719000 | -0.562950000 | -2.143941000 | 1  | 7.216560000  | 0.101799000  | -0.613895000 |
| 6  | -4.934171000 | -0.874504000 | -0.675257000 | 1  | 6.447873000  | 1.385018000  | -1.558462000 |
| 15 | 0.511479000  | 0.053291000  | -0.665140000 | 1  | 6.154378000  | 1.271330000  | 0.182088000  |
| 6  | -0.719168000 | -0.719337000 | 0.354626000  | 1  | -2.287629000 | -1.620038000 | -0.488759000 |
| 6  | 2.037796000  | -0.854429000 | -0.474994000 | 1  | 1.246850000  | -0.978058000 | 0.812032000  |
| 6  | 0.797461000  | 1.719978000  | -0.107578000 | 1  | -1.405864000 | 1.347147000  | 1.427504000  |
| 6  | -1.078959000 | -2.049501000 | 0.092739000  | 1  | -3.015330000 | -0.192370000 | 1.425489000  |
| 6  | -2.059175000 | -2.667456000 | 0.841624000  | 1  | -3.377647000 | 1.113117000  | 0.299306000  |
| 6  | -2.705505000 | -1.965332000 | 1.864548000  | 1  | -4.661497000 | -1.653182000 | 0.270765000  |
| 6  | -2.335054000 | -0.651711000 | 2.153367000  | 1  | -5.420733000 | -0.175152000 | 0.852510000  |
| 6  | -1.349311000 | -0.038142000 | 1.390459000  | 1  | -6.138648000 | -0.690183000 | -1.483630000 |
| 6  | 2.233548000  | -1.776756000 | 0.548510000  | 1  | -5.240545000 | 0.822024000  | -1.417276000 |
| 6  | 3.450396000  | -2.431111000 | 0.701350000  | 1  | -4.089254000 | -1.890198000 | -2.207827000 |
| 6  | 4.495475000  | -2.152777000 | -0.178657000 | 1  | -4.447600000 | -0.572831000 | -3.318071000 |
| 6  | 4.313461000  | -1.215241000 | -1.203219000 | 1  | -2.770263000 | 0.862247000  | -2.188516000 |
| 6  | 3.100410000  | -0.577679000 | -1.348232000 | 1  | -2.037105000 | -0.634668000 | -2.754999000 |
| 6  | -0.151708000 | 2.694967000  | -0.420396000 | 1  | -0.566505000 | -0.598449000 | 2.572234000  |
| 6  | 0.011971000  | 4.005891000  | 0.005795000  | 1  | -1.469602000 | -1.933478000 | 1.858136000  |
| 6  | 1.141432000  | 4.350475000  | 0.751407000  | 1  | 1.338126000  | -2.140217000 | 3.030837000  |
| 6  | 2.094364000  | 3.376297000  | 1.069216000  | 1  | -0.135154000 | -2.693232000 | 3.822087000  |
| 6  | 1.922919000  | 2.074206000  | 0.644791000  | 1  | 1.050525000  | -4.581998000 | 2.689809000  |
| 8  | -3.681283000 | -2.627807000 | 2.514000000  | 1  | -0.541166000 | -4.307617000 | 1.991547000  |
| 8  | 1.391078000  | 5.593121000  | 1.202071000  | 1  | 2.098017000  | -3.296300000 | 0.831771000  |
| 8  | 5.705825000  | -2.734515000 | -0.115014000 | 1  | 1.130726000  | -4.619335000 | 0.190737000  |
| 6  | -4.440310000 | -1.920645000 | 3.477998000  | 1  | -0.743271000 | -3.043764000 | -0.232106000 |
| 6  | 0.457960000  | 6.617048000  | 0.904086000  | 1  | 0.739515000  | -2.518290000 | -1.062784000 |
| 6  | 5.935790000  | -3.696460000 | 0.899765000  | 1  | 0.956893000  | 0.959301000  | 2.123518000  |
| 1  | 0.921245000  | -0.270284000 | -2.987051000 | 1  | 1.497442000  | 2.004005000  | 0.818177000  |
| 1  | -0.111090000 | 1.128307000  | -2.667633000 | 1  | -0.384883000 | 3.082923000  | 2.082923000  |
| 1  | -1.084108000 | -1.733782000 | -3.198411000 | 1  | 1.314188000  | 3.266789000  | 2.958114000  |
| 1  | -4.816700000 | 0.510894000  | -2.318817000 | 1  | -0.152178000 | 5.114742000  | 2.847874000  |
| 1  | -5.483809000 | -1.071528000 | -2.751604000 | 1  | 0.854271000  | 4.487378000  | 0.147172000  |
| 1  | -5.917407000 | -0.534795000 | -0.342614000 | 1  | -2.060575000 | 3.737075000  | 1.350829000  |
| 1  | -4.861265000 | -1.949269000 | -0.496047000 | 1  | -1.477938000 | 4.780811000  | 0.057160000  |
| 1  | -4.168799000 | -0.368279000 | -0.086018000 | 1  | -0.156690000 | 2.891000000  | -0.880493000 |
| 1  | -0.579904000 | -2.599680000 | -0.695074000 | 1  | -1.865397000 | 2.470667000  | -0.781350000 |
| 1  | -2.354974000 | -3.689449000 | 0.643813000  |    |              | 1_Pcy3_2     |              |
| 1  | -2.816018000 | -0.097760000 | 2.946382000  | 6  | 0.185098000  | 0.137620000  | -1.794731000 |
| 1  | -1.082182000 | 0.988881000  | 1.606503000  | 6  | 1.611030000  | 0.572062000  | -1.686912000 |
| 1  | 1.431892000  | -1.995236000 | 1.242726000  | 6  | 2.605414000  | -0.363517000 | -1.471317000 |
| 1  | 3.571820000  | -3.146468000 | 1.501817000  | 8  | 2.484513000  | -1.605169000 | -1.355276000 |
| 1  | 5.138783000  | -1.008150000 | -1.871672000 | 8  | 3.878835000  | 0.188658000  | -1.382493000 |
| 1  | 2.978316000  | 0.152291000  | -2.140608000 | 6  | 4.942695000  | -0.730233000 | -1.211744000 |
| 1  | -1.033364000 | 2.411062000  | -0.987868000 | 6  | 6.225858000  | 0.064368000  | -1.139501000 |
| 1  | -0.735817000 | 4.744211000  | -0.245573000 | 15 | -0.638371000 | 0.102640000  | -0.187041000 |
| 1  | 2.960970000  | 3.666566000  | 1.648740000  | 6  | -2.396095000 | -0.358416000 | -0.349564000 |
| 1  | 2.667317000  | 1.328518000  | 0.896495000  | 6  | 0.126678000  | -1.134634000 | 0.879324000  |
| 1  | -5.198646000 | -2.609390000 | 3.839699000  | 6  | -0.483317000 | 1.720792000  | 0.618226000  |
| 1  | -3.816915000 | -1.599115000 | 4.315044000  | 6  | -3.400960000 | 0.793200000  | -0.433376000 |
| 1  | -4.924468000 | -1.050103000 | 3.028477000  | 6  | -4.821556000 | 0.236861000  | -0.409741000 |
| 1  | 0.847073000  | 7.527182000  | 1.351702000  | 6  | -5.047629000 | -0.729303000 | -1.565852000 |
| 1  | 0.359928000  | 6.757086000  | -0.174447000 | 6  | -4.018356000 | -1.851644000 | -1.540722000 |
| 1  | -0.521321000 | 6.393082000  | 1.332342000  | 6  | -2.601791000 | -1.288968000 | -1.554797000 |
| 1  | 5.826824000  | -3.253923000 | 1.892188000  | 6  | -0.394096000 | -1.072779000 | 2.321015000  |
| 1  | 5.251408000  | -4.541676000 | 0.801000000  | 6  | 0.431457000  | -2.009460000 | -3.198140000 |
| 1  | 6.957257000  | -4.042413000 | 0.769923000  | 6  | 0.364402000  | -3.430969000 | 2.676358000  |
|    |              | 1_Pcy3_1     |              | 6  | 0.795685000  | -3.509930000 | 1.216462000  |
| 6  | 0.337879000  | 0.258852000  | -1.816572000 | 6  | -0.033241000 | -2.564389000 | 0.354308000  |
| 6  | 1.708971000  | 0.794849000  | -1.561294000 | 6  | 0.851970000  | 1.974923000  | 1.333868000  |
| 6  | 2.781888000  | -0.057042000 | -1.380572000 | 6  | 0.761101000  | 3.282744000  | 2.114227000  |
| 8  | 2.793514000  | -1.308627000 | -1.423636000 | 6  | 0.447948000  | 4.449200000  | 1.185202000  |
| 8  | 3.978927000  | 0.603760000  | -1.127776000 | 6  | -0.831719000 | 4.189753000  | 0.400312000  |
| 6  | 5.124153000  | -0.214928000 | -0.987492000 | 6  | -0.743243000 | 2.872241000  | -0.362393000 |
| 6  | 6.305716000  | 0.690729000  | -0.729110000 | 1  | -0.420693000 | 0.789414000  | -2.433621000 |
| 15 | -0.577745000 | -0.019703000 | -0.280086000 | 1  | 0.104766000  | -0.875536000 | -2.201772000 |
| 6  | -2.305413000 | -0.528111000 | -0.603441000 | 1  | 1.862233000  | 1.621318000  | -1.754181000 |
| 6  | 0.216241000  | -1.330366000 | 0.668038000  | 1  | 4.794622000  | -1.315856000 | -0.300255000 |
| 6  | -0.598326000 | 1.502207000  | 0.700903000  | 1  | 4.969111000  | -1.437393000 | -2.045472000 |
| 6  | -3.324214000 | 0.023239000  | 0.400317000  | 1  | 7.078199000  | -0.603855000 | -1.010166000 |
| 6  | -4.703499000 | -0.567327000 | 0.129090000  | 1  | 6.375280000  | 0.639099000  | -2.054626000 |
| 6  | -5.151976000 | -0.263474000 | -1.294049000 | 1  | 6.202859000  | 0.758688000  | -0.298265000 |
| 6  | -4.138348000 | -0.798959000 | -2.295987000 | 1  | -2.615899000 | -0.929554000 | 0.563337000  |
| 6  | -2.750270000 | -0.223416000 | -2.038920000 | 1  | 1.195726000  | -0.882921000 | -0.858369000 |
| 6  | -0.459501000 | -1.539510000 | 2.027265000  | 1  | -1.277460000 | 1.722317000  | 1.379123000  |
| 6  | 0.337450000  | -2.547603000 | 2.848805000  | 1  | -3.260030000 | 1.505898000  | 0.381738000  |
| 6  | 0.458804000  | -3.873265000 | 2.107042000  | 1  | -3.248535000 | 1.332485000  | -1.374448000 |
| 6  | 1.073636000  | -3.670463000 | 0.727713000  | 1  | -4.980979000 | -0.288453000 | 0.538617000  |
| 6  | 0.273688000  | -2.660671000 | -0.089064000 | 1  | -5.540681000 | 1.057122000  | -0.449004000 |
| 6  | 0.670106000  | 1.811453000  | 1.503807000  | 1  | -6.059698000 | -1.136837000 | -1.530343000 |
| 6  | 0.421084000  | 3.040942000  | 2.372608000  | 1  | -4.953351000 | -0.181906000 | -2.510483000 |
| 6  | 0.024659000  | 4.239997000  | 1.519020000  | 1  | -4.153230000 | -2.448980000 | -0.631645000 |

|    |              |              |              |    |              |              |              |
|----|--------------|--------------|--------------|----|--------------|--------------|--------------|
| 1  | -4.159566000 | -2.521885000 | -2.390508000 | 1  | -1.263473000 | 5.152068000  | -0.616923000 |
| 1  | -2.450408000 | -0.707997000 | -2.471154000 | 1  | -0.534993000 | 2.976602000  | -1.559602000 |
| 1  | -1.869221000 | -2.097029000 | -1.564476000 | 1  | -2.039946000 | 2.809339000  | -0.655192000 |
| 1  | -0.374462000 | -0.058751000 | 2.722856000  |    |              |              |              |
| 1  | -1.439144000 | -1.402687000 | 2.334080000  | 6  | -0.042068000 | 1_PBu3_1     | 0.317351000  |
| 1  | 1.472742000  | -1.668589000 | 3.194183000  | 6  | 1.413791000  | 0.446014000  | -1.712526000 |
| 1  | 0.078790000  | -1.961145000 | 4.230223000  | 15 | -1.012669000 | 0.501745000  | -1.402874000 |
| 1  | 0.982359000  | -4.097896000 | 3.290345000  | 6  | 2.130316000  | -0.701342000 | -0.203627000 |
| 1  | -0.668192000 | -3.798397000 | 2.759678000  | 8  | 1.695305000  | -1.874082000 | -1.105787000 |
| 1  | 1.848428000  | -3.221009000 | 1.125726000  | 8  | 3.476047000  | -0.481824000 | -1.044047000 |
| 1  | 0.707250000  | -4.531154000 | 0.840617000  | 6  | 4.236314000  | -1.620988000 | -0.855963000 |
| 1  | -1.090650000 | -2.850436000 | 0.418229000  | 6  | 5.659333000  | -1.168365000 | -0.497416000 |
| 1  | 0.287721000  | -2.625767000 | -0.685354000 | 6  | -0.590616000 | 2.082803000  | -0.268169000 |
| 1  | 1.117837000  | 1.153984000  | 2.000190000  | 6  | -2.798640000 | 0.510664000  | 0.529816000  |
| 1  | 1.643852000  | 2.045614000  | 0.584783000  | 6  | -0.592772000 | -0.781049000 | -0.476327000 |
| 1  | -0.030072000 | 3.195569000  | 2.868428000  | 6  | -3.465507000 | -0.863742000 | 0.967688000  |
| 1  | 1.696750000  | 3.459836000  | 2.647840000  | 6  | -0.760882000 | 3.249890000  | -0.535886000 |
| 1  | 0.366517000  | 5.379143000  | 1.751396000  | 6  | -1.184835000 | -0.543379000 | -0.441604000 |
| 1  | 1.277436000  | 4.571821000  | 0.479897000  | 6  | -0.473334000 | 4.596961000  | 2.357543000  |
| 1  | -1.680645000 | 4.142632000  | 1.092409000  | 6  | 0.961816000  | 4.717657000  | 0.214894000  |
| 1  | -1.027897000 | 5.008428000  | -0.294548000 | 6  | -1.046475000 | -1.777736000 | 0.708140000  |
| 1  | 0.092292000  | 2.915742000  | -1.068562000 | 6  | 0.401239000  | -2.206585000 | 3.244172000  |
| 1  | -1.649177000 | 2.709133000  | -0.946168000 | 6  | -2.984311000 | -1.748232000 | 3.436756000  |
|    |              | 1_PCy3_3     |              | 6  | -3.815506000 | -3.016903000 | -1.678679000 |
| 6  | 0.190127000  | 0.241154000  | -2.005893000 | 6  | -0.418148000 | 1.066139000  | -1.789143000 |
| 6  | 0.770638000  | -1.072415000 | -2.419766000 | 1  | -0.269857000 | -0.667987000 | -2.416598000 |
| 6  | 2.039163000  | -1.470218000 | -2.035756000 | 1  | 1.893277000  | 1.416111000  | -2.126572000 |
| 8  | 2.596915000  | -2.577771000 | -2.180728000 | 1  | 3.822371000  | -2.080387000 | -1.407965000 |
| 8  | 2.764825000  | -0.451066000 | -1.403015000 | 1  | 4.187955000  | -2.372016000 | 0.405140000  |
| 6  | 3.998377000  | -0.835441000 | -0.826236000 | 1  | 6.285368000  | -2.016246000 | -1.289937000 |
| 6  | 4.521144000  | 0.336566000  | -0.028376000 | 1  | 6.071885000  | -0.721636000 | 0.012603000  |
| 15 | -0.503332000 | 0.292114000  | -0.318714000 | 1  | 5.704963000  | -0.427515000 | -1.173858000 |
| 6  | -2.277474000 | -0.042286000 | -0.443535000 | 1  | -1.225037000 | 2.214651000  | 0.531333000  |
| 6  | 0.372823000  | -0.843474000 | 0.790401000  | 1  | 0.443254000  | 1.996078000  | 1.411517000  |
| 6  | -0.290514000 | 1.972754000  | 0.331827000  | 1  | -3.233241000 | 1.111279000  | 0.872544000  |
| 6  | -2.627258000 | -1.262966000 | -1.302739000 | 1  | -2.967893000 | 1.057004000  | 0.327358000  |
| 6  | -4.139066000 | -1.329035000 | -1.497796000 | 1  | -0.932836000 | -1.734982000 | -1.409496000 |
| 6  | -4.859380000 | -1.388592000 | -0.156472000 | 1  | 0.498322000  | -0.819156000 | 0.553082000  |
| 6  | -4.494529000 | -0.186533000 | 0.705904000  | 1  | -3.322127000 | -0.387047000 | 0.986344000  |
| 6  | -2.985358000 | -0.107112000 | 0.911331000  | 1  | -4.542493000 | -0.706326000 | -1.415218000 |
| 6  | 0.280410000  | -0.489438000 | 2.281288000  | 1  | -0.080700000 | 3.114786000  | -0.640254000 |
| 6  | 1.287434000  | -1.337527000 | 3.053676000  | 1  | -1.777996000 | 3.246445000  | -1.288113000 |
| 6  | 1.019295000  | -2.824050000 | 2.857102000  | 1  | -0.674765000 | 0.302199000  | -0.844368000 |
| 6  | 1.012035000  | -3.182914000 | 1.376957000  | 1  | -2.242280000 | -0.302199000 | 2.827964000  |
| 6  | 0.012594000  | -2.324218000 | 0.609444000  | 1  | -0.676206000 | 5.386487000  | 2.274648000  |
| 6  | 1.200999000  | 2.304007000  | 0.481498000  | 1  | -1.168059000 | 4.749375000  | -0.512001000 |
| 6  | 1.377101000  | 3.697307000  | 1.073932000  | 1  | 1.175454000  | 5.727901000  | 1.046257000  |
| 6  | 0.699714000  | 4.741880000  | 0.197339000  | 1  | 1.164869000  | 4.034762000  | 1.058739000  |
| 6  | -0.777607000 | 4.415611000  | 0.025644000  | 1  | 1.665370000  | 4.034762000  | 1.534559000  |
| 6  | -0.973589000 | 3.018723000  | -0.555862000 | 1  | -1.500845000 | -1.566563000 | -0.095420000 |
| 1  | 0.930964000  | 1.043328000  | -2.041560000 | 1  | -1.618711000 | -1.566563000 | 4.214770000  |
| 1  | -0.637629000 | 0.555970000  | -2.650504000 | 1  | 0.477378000  | -3.032140000 | 2.799853000  |
| 1  | 0.122498000  | -1.823064000 | -2.853294000 | 1  | 0.850507000  | -2.536185000 | 4.145099000  |
| 1  | 3.853436000  | -1.708382000 | -0.181451000 | 1  | 1.002179000  | -1.002179000 | 2.497840000  |
| 1  | 4.706436000  | -1.128511000 | -1.605622000 | 1  | -3.028552000 | -1.183281000 | 3.820240000  |
| 1  | 5.499122000  | 0.101425000  | 0.393425000  | 1  | -1.934190000 | -2.016723000 | -1.183281000 |
| 1  | 4.621529000  | 1.221277000  | -0.659508000 | 1  | -3.463327000 | -2.016723000 | -2.615240000 |
| 1  | 3.843076000  | 0.576367000  | 0.793853000  | 1  | -3.769899000 | -3.589951000 | -1.527494000 |
| 1  | -2.651290000 | 0.838830000  | -0.983956000 | 1  | -4.863947000 | -2.778287000 | -3.659955000 |
| 1  | 1.416681000  | -0.712355000 | 0.472368000  |    |              |              | -0.860291000 |
| 1  | -0.758860000 | 1.998185000  | 1.323580000  | 6  | 0.392893000  | 1_PBu3_2     | -0.677491000 |
| 1  | -2.120238000 | -1.212383000 | -2.267893000 | 6  | 1.825482000  | -0.677491000 | 1.527085000  |
| 1  | -2.290647000 | -2.175469000 | -0.805214000 | 15 | -0.588531000 | -0.213239000 | 1.492392000  |
| 1  | -4.467726000 | -0.437845000 | -2.044359000 | 6  | 2.572771000  | -0.213239000 | 0.071822000  |
| 1  | -4.394232000 | -2.195535000 | -2.110347000 | 8  | 2.125499000  | -0.622692000 | 0.402114000  |
| 1  | -5.939746000 | -1.436249000 | -0.305328000 | 8  | 3.902492000  | -1.250903000 | -0.594902000 |
| 1  | -4.565067000 | -2.305786000 | 0.366476000  | 6  | 4.665684000  | -0.250507000 | 0.415963000  |
| 1  | -4.834754000 | 0.729689000  | 0.210403000  | 6  | 6.083815000  | -0.607223000 | -0.722854000 |
| 1  | -4.999257000 | -0.237698000 | 1.672326000  | 6  | 0.084630000  | -0.144102000 | -0.485725000 |
| 1  | -2.647565000 | -1.002828000 | 1.443614000  | 6  | -0.776108000 | 1.248254000  | -0.710318000 |
| 1  | -2.725821000 | 0.757287000  | 1.528561000  | 6  | -2.217018000 | -1.470034000 | -1.203946000 |
| 1  | 0.472030000  | 0.567699000  | 2.465459000  | 6  | -0.813535000 | 0.240481000  | 0.700519000  |
| 1  | -0.729936000 | -0.703622000 | 2.643799000  | 6  | -0.036146000 | -0.813535000 | -0.723888000 |
| 1  | 2.295111000  | -1.099549000 | 2.689370000  | 6  | -3.228148000 | 2.499678000  | 0.154979000  |
| 1  | 1.257812000  | -1.077946000 | 4.113611000  | 6  | 0.844552000  | 0.675270000  | -0.355148000 |
| 1  | 1.761014000  | -3.419462000 | 3.393033000  | 6  | 0.706501000  | 3.626655000  | -0.366168000 |
| 1  | 0.040291000  | -3.066726000 | 3.286324000  | 6  | -4.475178000 | 4.891048000  | 0.466566000  |
| 1  | 2.009544000  | -3.018714000 | 0.951442000  | 6  | -5.502940000 | 1.279299000  | 0.278043000  |
| 1  | 0.775728000  | -4.239527000 | 1.238485000  | 6  | -1.971409000 | 1.688263000  | -0.765089000 |
| 1  | -0.993788000 | -2.493331000 | 1.009575000  | 6  | -2.084265000 | -3.238620000 | 0.212157000  |
| 1  | 0.009808000  | -2.595949000 | -0.445555000 | 1  | 0.250396000  | -4.732566000 | 0.473172000  |
| 1  | 1.707658000  | 1.560229000  | 1.098863000  | 1  | -0.134956000 | -1.763652000 | 1.623430000  |
| 1  | 1.679220000  | 2.271872000  | -0.503393000 | 1  | 2.244270000  | -0.224893000 | 2.371222000  |
| 1  | 0.933078000  | 3.720236000  | 2.075768000  | 1  | 4.627579000  | -0.224893000 | 2.311255000  |
| 1  | 2.440317000  | 3.917397000  | 1.189630000  | 1  | 4.247480000  | -1.688507000 | 0.877030000  |
| 1  | 0.822240000  | 5.739160000  | 0.623879000  | 1  | 6.712301000  | -0.139452000 | -0.618575000 |
| 1  | 1.182737000  | 4.749087000  | -0.786242000 | 1  | 6.117919000  | -0.397745000 | -1.340234000 |
| 1  | -1.271766000 | 4.463188000  | 1.002548000  | 1  | 6.500958000  | 0.936776000  | -0.342376000 |
|    |              |              |              | 1  |              | -0.621401000 | 0.402014000  |

|    |              |              |              |    |              |              |              |
|----|--------------|--------------|--------------|----|--------------|--------------|--------------|
| 1  | 1.130843000  | 1.012070000  | -0.919163000 | 6  | 1.222543000  | 0.234492000  | 0.005109000  |
| 1  | -0.424935000 | 1.374935000  | -1.670077000 | 8  | 0.881668000  | -0.964710000 | 0.050089000  |
| 1  | -1.692815000 | -1.218384000 | -1.746557000 | 8  | 2.551970000  | 0.550874000  | -0.015855000 |
| 1  | 0.069020000  | -1.317453000 | -1.874305000 | 6  | 3.461524000  | -0.541136000 | 0.025413000  |
| 1  | -2.599831000 | -0.598273000 | 1.287240000  | 6  | 4.859469000  | 0.027139000  | -0.006876000 |
| 1  | -2.034933000 | 1.054427000  | 1.410579000  | 6  | -3.605984000 | -0.153706000 | -0.097851000 |
| 1  | -0.884725000 | -3.558000000 | -1.607601000 | 6  | -1.421851000 | -1.320063000 | -1.462145000 |
| 1  | 0.137463000  | -3.156650000 | -0.241213000 | 6  | -1.605641000 | -1.223456000 | 1.537159000  |
| 1  | -1.079396000 | 2.831515000  | 0.187477000  | 1  | -2.971113000 | 2.221669000  | 0.010509000  |
| 1  | 0.256187000  | 2.265261000  | 1.185094000  | 1  | -1.497688000 | 3.330266000  | 0.027984000  |
| 1  | -3.516331000 | -0.181239000 | -0.971559000 | 1  | 0.825504000  | 2.332115000  | -0.059928000 |
| 1  | -2.775935000 | 1.410840000  | -1.029846000 | 1  | 3.294251000  | -1.125823000 | 0.932855000  |
| 1  | 1.883800000  | 3.284656000  | -0.362435000 | 1  | 3.284224000  | -1.201697000 | -0.826235000 |
| 1  | 0.586105000  | 3.831547000  | -1.409428000 | 1  | 5.591949000  | -0.779933000 | 0.025126000  |
| 1  | 1.348194000  | 5.690520000  | 0.094679000  | 1  | 5.021328000  | 5.027110000  | -0.918915000 |
| 1  | -0.323392000 | 5.254927000  | 0.454287000  | 1  | 5.030429000  | 0.681011000  | 0.849000000  |
| 1  | 0.978623000  | 4.699798000  | 1.506874000  | 1  | -3.891471000 | 0.373714000  | -1.006627000 |
| 1  | -4.183385000 | 2.146357000  | 0.878247000  | 1  | -4.032338000 | -1.158333000 | -0.124414000 |
| 1  | -4.910732000 | 0.553574000  | 0.971081000  | 1  | -3.989860000 | 0.369314000  | 0.776204000  |
| 1  | -5.084180000 | 2.425082000  | -1.454104000 | 1  | -1.149186000 | -2.331984000 | -1.169819000 |
| 1  | -5.821032000 | 0.826113000  | -1.355278000 | 1  | -2.291103000 | -1.344178000 | -2.119447000 |
| 1  | -6.390361000 | 2.125617000  | -0.306530000 | 1  | -0.577772000 | -0.867123000 | -1.975769000 |
| 1  | -1.833829000 | -2.715204000 | 1.163836000  | 1  | -0.552616000 | -1.369322000 | -1.736212000 |
| 1  | -2.903913000 | -2.858343000 | -0.219895000 | 1  | -2.078611000 | -0.627863000 | 2.319315000  |
| 1  | -2.899987000 | -4.964005000 | 1.158868000  | 1  | -2.113182000 | -2.186846000 | 1.468731000  |
| 1  | -2.262171000 | -5.274846000 | -0.457931000 |    |              | 2_PMe3_2     |              |
| 1  | -1.159744000 | -5.117752000 | 0.908791000  | 6  | -1.951309000 | 2.310669000  | 0.000493000  |
|    |              | 1_PBu3_3     |              | 6  | -1.069717000 | 1.277892000  | 0.000178000  |
| 6  | 0.274001000  | -1.240589000 | 1.255976000  | 6  | 0.351289000  | 1.388385000  | -0.000211000 |
| 6  | 0.824300000  | -2.322386000 | 0.382163000  | 15 | -1.787165000 | -0.371969000 | -0.000049000 |
| 15 | -0.532060000 | 0.022984000  | 0.258034000  | 6  | 1.190277000  | 0.172487000  | 0.000027000  |
| 6  | 2.126882000  | -2.321067000 | -0.094000000 | 8  | 0.828307000  | -0.923216000 | 0.000442000  |
| 8  | 2.682165000  | -3.135784000 | -0.857596000 | 8  | 2.522328000  | 0.568062000  | -0.000237000 |
| 8  | 2.883885000  | -1.247104000 | 0.382411000  | 6  | 3.415637000  | -0.538875000 | 0.000102000  |
| 6  | 4.230931000  | -1.189876000 | -0.048710000 | 6  | 4.821772000  | 0.009437000  | 0.000049000  |
| 6  | 4.936671000  | -0.141148000 | 0.778906000  | 6  | -3.572974000 | -0.226462000 | -0.000415000 |
| 6  | -1.278728000 | 1.279133000  | 1.300857000  | 6  | -1.438587000 | -1.265361000 | -1.515699000 |
| 6  | 0.652206000  | 0.802294000  | -0.833757000 | 6  | -1.439400000 | -1.265866000 | 1.515481000  |
| 6  | -1.777695000 | -0.747684000 | -0.768235000 | 1  | -3.021869000 | 2.176480000  | 0.000597000  |
| 6  | 1.542767000  | 1.834186000  | -0.149648000 | 1  | -1.583473000 | 3.330950000  | 0.000573000  |
| 6  | -2.027120000 | 2.385231000  | 0.546613000  | 1  | 0.794162000  | 2.376637000  | -0.000475000 |
| 6  | -2.790416000 | -1.569761000 | 0.023989000  | 1  | 3.233386000  | -1.158806000 | 0.880705000  |
| 6  | -3.525071000 | 2.123933000  | 0.436419000  | 1  | 3.233498000  | -1.159259000 | -0.880210000 |
| 6  | -4.235163000 | 3.221471000  | -0.339411000 | 1  | 4.997317000  | 0.621977000  | -0.884958000 |
| 6  | -3.962839000 | -2.001552000 | -0.845651000 | 1  | 4.997188000  | 0.622449000  | 0.884756000  |
| 6  | -4.960108000 | -2.853795000 | -0.077503000 | 1  | 5.542055000  | -0.809119000 | 0.000320000  |
| 6  | 2.649536000  | 2.310647000  | -1.080367000 | 1  | -3.925262000 | 0.286517000  | -0.893753000 |
| 6  | 3.480372000  | 3.421124000  | -0.457380000 | 1  | -3.965901000 | -1.245554000 | -0.000657000 |
| 1  | -0.480721000 | -1.592426000 | 1.967707000  | 1  | -3.925634000 | 0.286192000  | 0.892965000  |
| 1  | 1.050004000  | -0.734560000 | 1.836878000  | 1  | -1.185642000 | -2.297991000 | -1.283312000 |
| 1  | 0.164465000  | -3.113273000 | 0.048653000  | 1  | -2.323923000 | -1.235598000 | -2.150927000 |
| 1  | 4.703925000  | -2.166104000 | 0.071870000  | 1  | -0.596460000 | -0.806224000 | -0.206491000 |
| 1  | 4.273372000  | -0.942647000 | -1.115077000 | 1  | -0.597339000 | -0.807159000 | 2.026752000  |
| 1  | 5.976739000  | -0.045924000 | 0.464158000  | 1  | -2.324987000 | -1.236077000 | 2.150354000  |
| 1  | 4.455167000  | 0.832180000  | 0.668722000  | 1  | -1.186638000 | -2.298486000 | 1.282830000  |
| 1  | 4.920639000  | -0.413452000 | 1.835286000  |    |              | 2_PMe3_3     |              |
| 1  | -1.942082000 | 0.768354000  | 2.005346000  | 6  | 2.042669000  | 2.205324000  | -0.351331000 |
| 1  | -0.452187000 | 1.680842000  | 1.893489000  | 6  | 1.081712000  | 1.270662000  | -0.136148000 |
| 1  | 0.096559000  | 1.252467000  | -1.661411000 | 6  | -0.317371000 | 1.517371000  | -0.024794000 |
| 1  | 1.248675000  | -0.016852000 | -1.248661000 | 15 | 1.652113000  | -0.429990000 | 0.001243000  |
| 1  | -2.265672000 | 0.052210000  | -1.334875000 | 6  | -1.239461000 | 0.502635000  | 0.237031000  |
| 1  | -1.245244000 | -1.372345000 | -1.490751000 | 8  | -0.974332000 | -0.706938000 | 0.403659000  |
| 1  | 0.939780000  | 2.691332000  | 0.168198000  | 8  | -2.535125000 | 0.929317000  | 0.316740000  |
| 1  | 1.990341000  | 1.401692000  | 0.752307000  | 8  | -3.534289000 | -0.073276000 | 0.464793000  |
| 1  | -1.874523000 | 3.335421000  | 1.061714000  | 6  | -3.877176000 | -0.710228000 | -0.864600000 |
| 1  | -1.606170000 | 2.517140000  | -0.459344000 | 6  | 1.023278000  | -1.461417000 | -1.324775000 |
| 1  | -2.294057000 | -2.451415000 | 0.440743000  | 6  | 3.426925000  | -0.467041000 | -0.244355000 |
| 1  | -3.168274000 | -0.990169000 | 0.874179000  | 6  | 1.448256000  | -1.095579000 | 1.654184000  |
| 1  | -3.702377000 | 1.155565000  | -0.041486000 | 1  | 3.091046000  | 1.967545000  | -0.442286000 |
| 1  | -3.939288000 | 2.047038000  | 1.445949000  | 1  | 1.765329000  | 3.249805000  | -0.442957000 |
| 1  | -5.309277000 | 3.043294000  | -0.397237000 | 1  | -0.675652000 | 2.533147000  | -0.138738000 |
| 1  | -4.081084000 | 4.192981000  | 0.135343000  | 1  | -3.197456000 | -0.824385000 | 1.179672000  |
| 1  | -3.850535000 | 3.286977000  | -1.359596000 | 1  | -4.399777000 | 0.440977000  | 0.882269000  |
| 1  | -4.456584000 | -1.107000000 | -1.239442000 | 1  | -4.215223000 | 0.045449000  | -1.575016000 |
| 1  | -3.582085000 | -2.553056000 | -1.709957000 | 1  | -3.004193000 | -1.215831000 | -1.278174000 |
| 1  | -5.801685000 | -3.151389000 | -0.703785000 | 1  | -4.674542000 | -1.444318000 | -0.738361000 |
| 1  | -4.484632000 | -3.761863000 | 0.298967000  | 1  | -0.723682000 | -2.429332000 | -0.927689000 |
| 1  | -5.357542000 | -2.307145000 | 0.780611000  | 1  | 0.157388000  | -0.986584000 | -1.779064000 |
| 1  | 2.204472000  | 2.657638000  | -2.017781000 | 1  | 1.809940000  | -1.593866000 | -2.067625000 |
| 1  | 3.284678000  | 1.455804000  | -1.335516000 | 1  | 3.694291000  | -0.102227000 | -1.234324000 |
| 1  | 4.294798000  | 3.731929000  | -1.112572000 | 1  | 3.941782000  | 0.108906000  | 0.522763000  |
| 1  | 2.862124000  | 4.297627000  | -0.251130000 | 1  | 3.729528000  | -1.513142000 | -0.160225000 |
| 1  | 3.917624000  | 3.096508000  | 0.489895000  | 1  | 1.110327000  | -2.128571000 | 1.593437000  |
|    |              | 2_PMe3_1     |              | 1  | 2.408324000  | -1.051131000 | 2.168396000  |
| 6  | -1.897065000 | 2.321977000  | 0.013545000  | 1  | 0.705392000  | -0.517013000 | 2.196045000  |
| 6  | -1.045523000 | 1.263055000  | -0.006297000 |    |              | 2_PPhMe2_1   |              |
| 6  | 0.376992000  | 1.346493000  | -0.029074000 | 6  | -2.379448000 | 1.934110000  | -1.573316000 |
| 15 | -1.829242000 | -0.355719000 | -0.007264000 | 6  | -1.330033000 | 1.573521000  | -0.791342000 |

|    |              |              |              |    |              |              |              |
|----|--------------|--------------|--------------|----|--------------|--------------|--------------|
| 6  | 0.002127000  | 2.068675000  | -0.888656000 | 6  | 2.275952000  | 0.981915000  | 1.071299000  |
| 15 | -1.649947000 | 2.245717000  | 0.386885000  | 1  | 1.165261000  | -3.397756000 | -1.300201000 |
| 6  | 0.977142000  | 1.681193000  | 0.028323000  | 1  | -0.325130000 | -3.326971000 | -2.383949000 |
| 8  | 0.769218000  | 0.978851000  | 1.040962000  | 1  | -2.147787000 | -1.590702000 | -1.899550000 |
| 2  | 2.238937000  | 2.123869000  | -0.241963000 | 1  | -2.757602000 | 2.303462000  | 0.065906000  |
| 6  | 3.289450000  | 1.509883000  | 0.498840000  | 1  | -4.292302000 | 2.085578000  | -0.790435000 |
| 6  | 3.574746000  | 0.114139000  | -0.015173000 | 1  | -4.641797000 | 2.039683000  | 1.686307000  |
| 6  | -3.296776000 | -0.395955000 | 0.071055000  | 1  | -5.048090000 | 0.477525000  | 0.961698000  |
| 6  | -0.592866000 | -1.156988000 | 0.036295000  | 1  | -3.507389000 | 0.686971000  | 1.814942000  |
| 6  | -1.714946000 | 0.728665000  | 2.111638000  | 1  | 2.796689000  | -2.349656000 | -0.211249000 |
| 6  | -0.197292000 | -1.366820000 | -1.283223000 | 1  | 2.747980000  | -1.950169000 | 1.514789000  |
| 6  | 0.593114000  | -2.465941000 | -1.600511000 | 1  | 1.835770000  | -3.351627000 | 0.917532000  |
| 6  | 0.980872000  | -3.354893000 | -0.605488000 | 1  | 0.386579000  | -2.086688000 | -2.666423000 |
| 6  | 0.573049000  | -3.150776000 | 0.709477000  | 1  | -1.109638000 | -1.458499000 | 1.921112000  |
| 6  | -0.213787000 | -2.053613000 | 1.032735000  | 1  | 0.080781000  | -0.329377000 | -2.575318000 |
| 1  | -3.355242000 | 1.479998000  | -1.504810000 | 1  | 0.914450000  | 0.315820000  | -1.969069000 |
| 1  | -2.251073000 | 2.714844000  | -2.314924000 | 1  | 2.119916000  | 2.405202000  | -2.518773000 |
| 1  | 0.265058000  | 2.717731000  | -1.713973000 | 1  | 3.406072000  | 3.591178000  | -0.768970000 |
| 1  | 4.153947000  | 2.159086000  | 0.363536000  | 1  | 3.502802000  | 2.679120000  | 1.529639000  |
| 1  | 3.031446000  | 1.489716000  | 1.558026000  | 1  | 2.321989000  | 0.581562000  | 2.078365000  |
| 1  | 3.837014000  | 0.143226000  | -1.073821000 |    |              |              |              |
| 1  | 4.406789000  | -0.329542000 | 0.533729000  |    |              |              |              |
| 1  | 2.696892000  | -0.523448000 | 0.111444000  | 6  | -1.069043000 | -2.232140000 | -1.577921000 |
| 1  | -3.444463000 | -1.225315000 | 0.765470000  | 6  | -0.087618000 | -1.707942000 | -2.795668000 |
| 1  | -4.054655000 | 0.362373000  | 0.266029000  | 6  | 1.303363000  | -1.979851000 | -0.930723000 |
| 1  | -3.385687000 | -0.766052000 | -0.948924000 | 15 | -0.645648000 | -0.500831000 | 0.425368000  |
| 1  | -1.511131000 | 1.795936000  | 2.175938000  | 8  | 2.277731000  | -1.466890000 | -0.070970000 |
| 1  | -0.952956000 | 0.207131000  | 2.683667000  | 8  | 2.075167000  | -0.785524000 | 0.951786000  |
| 1  | -2.706259000 | 0.514891000  | 2.509609000  | 8  | 3.558854000  | -1.765547000 | -0.436533000 |
| 1  | -0.499023000 | -0.670829000 | -2.057814000 | 6  | 4.597495000  | -1.129354000 | 0.290117000  |
| 1  | 0.907413000  | -2.623036000 | -2.624090000 | 6  | 4.787795000  | 0.297963000  | 0.178176000  |
| 1  | 1.600009000  | -4.207519000 | -0.852991000 | 6  | 0.157349000  | 0.071792000  | -0.163086000 |
| 1  | 0.872651000  | -3.843479000 | -1.485097000 | 6  | -2.403737000 | -0.217796000 | 0.154577000  |
| 1  | -0.518876000 | -1.894432000 | 2.059609000  | 6  | -0.548111000 | -1.033194000 | 2.129678000  |
|    |              |              |              | 6  | -2.841931000 | 0.793782000  | -0.699998000 |
|    |              |              |              | 6  | -4.200349000 | 0.978404000  | -0.922325000 |
| 6  | -0.561468000 | 2.841394000  | -1.638159000 | 6  | -5.127357000 | 0.153498000  | -0.296094000 |
| 6  | -0.004153000 | 1.895854000  | -0.837031000 | 6  | -4.696373000 | -0.857619000 | 0.555422000  |
| 6  | 1.339177000  | 1.429245000  | -0.897928000 | 6  | -3.339368000 | -1.043807000 | 0.781903000  |
| 15 | -1.101542000 | 1.187489000  | 0.398743000  | 6  | 0.594020000  | 0.405175000  | -1.117189000 |
| 6  | 1.806455000  | 0.392662000  | -0.085686000 | 6  | 1.205796000  | 2.635868000  | -1.334017000 |
| 8  | 1.145955000  | -0.215882000 | 0.780289000  | 6  | 1.379051000  | 3.522863000  | -0.277493000 |
| 8  | 3.110426000  | 0.054823000  | -0.296509000 | 6  | 0.935443000  | 3.187720000  | 0.998107000  |
| 6  | 3.629401000  | -0.995967000 | 0.510485000  | 6  | 0.322702000  | 1.962399000  | 1.221498000  |
| 6  | 5.070230000  | -1.206036000 | 0.113531000  | 1  | -2.108645000 | -1.957795000 | -1.494100000 |
| 6  | -2.694270000 | 2.006703000  | 0.308147000  | 1  | -0.807544000 | -2.960938000 | -2.337445000 |
| 6  | -1.509652000 | -0.515578000 | 0.033192000  | 1  | 1.619265000  | -2.587281000 | -1.769984000 |
| 6  | -0.568495000 | 1.474683000  | 2.085005000  | 1  | 4.375468000  | -1.161316000 | 1.357241000  |
| 6  | -1.257761000 | -1.030744000 | -1.235730000 | 1  | 5.492921000  | -1.721792000 | 0.103080000  |
| 6  | -1.645848000 | -2.329624000 | -1.538996000 | 1  | 5.615086000  | 0.761600000  | 0.357613000  |
| 6  | -2.284123000 | -3.109352000 | -0.580875000 | 1  | 5.011253000  | 0.323003000  | -1.245761000 |
| 6  | -2.540327000 | -2.590325000 | 0.683695000  | 1  | 3.882707000  | 0.879823000  | 0.005360000  |
| 6  | -2.157171000 | -1.291567000 | 0.991779000  | 1  | -0.864249000 | -2.075433000 | -2.180307000 |
| 1  | -1.583460000 | 3.172745000  | -1.543419000 | 1  | 0.475103000  | -0.949807000 | 2.479503000  |
| 1  | 0.037896000  | 3.308459000  | -2.411906000 | 1  | -1.224340000 | -0.425897000 | -2.731299000 |
| 1  | 2.009611000  | 1.873062000  | -1.623273000 | 1  | -2.125558000 | 1.439523000  | -1.192074000 |
| 1  | 3.545308000  | -0.725462000 | 1.565361000  | 1  | -4.533059000 | 1.767320000  | -1.583926000 |
| 1  | 3.040170000  | -1.902524000 | 0.356727000  | 1  | -6.185637000 | 2.299545000  | -0.469882000 |
| 1  | 5.144279000  | -1.480444000 | -0.939296000 | 1  | -5.415526000 | -1.502234000 | 1.043416000  |
| 1  | 5.651672000  | -0.297775000 | 0.275611000  | 1  | -3.012641000 | -1.440569000 | 1.440569000  |
| 1  | 5.509356000  | -2.006563000 | 0.709445000  | 1  | 0.461694000  | 0.708646000  | -1.935496000 |
| 1  | -2.595800000 | 3.071666000  | 0.515316000  | 1  | 1.550645000  | 2.896740000  | -2.325971000 |
| 1  | -3.163929000 | 1.848901000  | -0.661155000 | 1  | 1.861487000  | 4.476806000  | -0.447219000 |
| 1  | -3.318256000 | 1.551080000  | 1.080222000  | 1  | 1.072166000  | 3.878332000  | 1.819896000  |
| 1  | -1.228587000 | 2.209764000  | 2.544545000  | 1  | -0.009195000 | 1.697287000  | 2.218141000  |
| 1  | 0.454578000  | 1.844114000  | 2.073077000  |    |              |              |              |
| 1  | -0.591189000 | 0.544936000  | 2.649015000  |    |              |              |              |
| 1  | -0.750357000 | -0.423897000 | -1.976664000 | 6  | 0.676192000  | -1.943965000 | -1.876766000 |
| 1  | -1.444835000 | -2.733857000 | -2.522554000 | 6  | -0.204530000 | -1.425680000 | -0.980033000 |
| 1  | -2.581554000 | -4.122369000 | -0.819236000 | 15 | -1.617516000 | -1.591237000 | -1.016655000 |
| 1  | -3.037397000 | -3.196009000 | 1.430189000  | 6  | 0.521449000  | -0.427786000 | 0.337232000  |
| 1  | -2.357387000 | -0.887779000 | 1.978015000  | 6  | -2.478903000 | -0.911408000 | -0.151943000 |
|    |              |              |              | 8  | -2.139531000 | -0.119647000 | 0.749208000  |
|    |              |              |              | 8  | -3.801547000 | -1.173698000 | -0.355150000 |
| 6  | 0.235120000  | -2.913647000 | -1.552513000 | 6  | -4.718174000 | -0.501296000 | 0.500461000  |
| 6  | -0.260012000 | -1.844938000 | -0.875696000 | 6  | -6.109829000 | -0.929884000 | 0.103788000  |
| 6  | -1.497194000 | -1.188770000 | -1.132993000 | 6  | 2.310598000  | -0.594887000 | 0.199268000  |
| 15 | 0.766405000  | -1.242001000 | 0.472040000  | 6  | 0.200312000  | 1.312213000  | 0.096689000  |
| 6  | -1.873423000 | -0.021770000 | -0.464210000 | 6  | 0.131203000  | -0.983461000 | 1.999603000  |
| 8  | -1.210848000 | 0.560557000  | 0.418442000  | 6  | -0.274587000 | 1.771055000  | -1.128710000 |
| 8  | -3.078981000 | 0.485579000  | -0.856330000 | 6  | -0.459490000 | 3.134024000  | -1.324506000 |
| 6  | -3.572049000 | 1.605318000  | -0.128421000 | 6  | -0.168793000 | 4.030918000  | -0.302551000 |
| 6  | -4.232955000 | 1.174013000  | 1.162888000  | 6  | 0.311286000  | 3.569370000  | 0.918852000  |
| 6  | 2.167652000  | -2.342314000 | 0.677010000  | 6  | 0.500628000  | 2.208797000  | 1.120033000  |
| 6  | 1.546051000  | 0.321404000  | 0.085551000  | 6  | 3.085602000  | 0.374593000  | -0.434602000 |
| 6  | -0.045892000 | -1.284250000 | 2.069483000  | 6  | 4.457687000  | 0.191381000  | -0.567283000 |
| 6  | 1.492276000  | 0.829705000  | -1.209585000 | 6  | 5.057545000  | -0.959654000 | -0.073464000 |
| 6  | 2.165024000  | 2.005818000  | -1.513995000 | 6  | 4.287058000  | -1.933945000 | 0.554888000  |
| 6  | 2.886714000  | 2.672245000  | -0.529374000 | 6  | 2.918999000  | -1.753047000 | 0.691175000  |
| 6  | 2.941739000  | 2.161317000  | 0.762666000  | 1  | 1.744688000  | -1.816730000 | -1.804312000 |

|    |              |              |               |    |              |              |              |
|----|--------------|--------------|---------------|----|--------------|--------------|--------------|
| 1  | 0.300835000  | -2.527509000 | -2.710435000  | 6  | 4.530082000  | -0.377774000 | 0.733302000  |
| 1  | -2.039174000 | -2.230862000 | -1.7202029000 | 6  | 4.770428000  | -1.714450000 | 0.429177000  |
| 1  | -4.506772000 | -0.758394000 | 1.540735000   | 6  | 3.716578000  | -2.547403000 | 0.077186000  |
| 1  | -4.592439000 | 0.578708000  | 0.397726000   | 6  | 2.418621000  | -2.050736000 | 0.031957000  |
| 1  | -6.847804000 | -0.436618000 | 0.736938000   | 1  | 1.844366000  | -0.557210000 | 2.761456000  |
| 1  | -6.314236000 | -0.664351000 | -0.933971000  | 1  | 0.534605000  | -0.246876000 | 4.025960000  |
| 1  | -6.227606000 | -2.008437000 | 0.214056000   | 1  | -1.862729000 | 0.187457000  | 3.247110000  |
| 1  | -0.470995000 | -1.889002000 | 1.933154000   | 1  | -4.196430000 | 1.715154000  | -0.211706000 |
| 1  | 1.047533000  | -1.182215000 | 2.551692000   | 1  | -5.477391000 | 1.297480000  | 0.937758000  |
| 1  | -0.456110000 | -0.218837000 | 2.499606000   | 1  | -3.807265000 | -0.711082000 | -0.660979000 |
| 1  | -0.506891000 | 1.065898000  | -1.918272000  | 1  | -5.101447000 | -1.128903000 | 0.479666000  |
| 1  | -0.834198000 | 3.494355000  | -2.273558000  | 1  | -5.485623000 | -0.269242000 | -1.019054000 |
| 1  | -0.316953000 | 5.091846000  | -0.457512000  | 1  | -0.379938000 | -0.181884000 | -2.492894000 |
| 1  | 0.538698000  | 4.267844000  | 1.713430000   | 1  | -1.700176000 | -1.890778000 | -3.681617000 |
| 1  | 0.880835000  | 1.848011000  | 2.069098000   | 1  | -2.591702000 | -3.847958000 | -2.456215000 |
| 1  | 2.623120000  | 1.271715000  | -0.826727000  | 1  | -2.145547000 | -4.099960000 | -0.034456000 |
| 1  | 5.054674000  | 0.949156000  | -1.057414000  | 1  | -0.796460000 | -2.404543000 | 1.157966000  |
| 1  | 6.125702000  | -1.100271000 | -0.177260000  | 1  | 1.836956000  | 0.750109000  | -2.114542000 |
| 1  | 4.751929000  | -2.833478000 | 0.936375000   | 1  | 2.263435000  | 2.954158000  | -3.145750000 |
| 1  | 2.320332000  | -2.520616000 | 1.168274000   | 1  | 1.488324000  | 5.016594000  | -2.018604000 |
|    |              | 2_PPh2Me_3   |               | 1  | 0.259220000  | 4.872237000  | 0.124007000  |
| 6  | 0.405069000  | -0.212785000 | 3.417464000   | 1  | -0.240732000 | 2.658908000  | 1.117613000  |
| 6  | -0.062488000 | 0.064705000  | 2.171639000   | 1  | 3.053891000  | 1.164920000  | 0.916813000  |
| 6  | -1.239884000 | 0.802995000  | 1.866317000   | 1  | 5.348956000  | 0.274593000  | 1.006529000  |
| 15 | 0.895396000  | -0.643732000 | 0.820022000   | 1  | 5.779968000  | -2.103239000 | 0.463156000  |
| 6  | -1.585468000 | 1.136307000  | 0.554746000   | 1  | 3.900567000  | -3.585862000 | -0.164899000 |
| 8  | -0.921321000 | 0.860298000  | -0.464018000  | 1  | 1.605777000  | -2.709311000 | -0.244357000 |
| 8  | -2.753738000 | 1.826631000  | 0.432171000   |    |              | 2_PPh3_2     |              |
| 6  | -3.135138000 | 2.192061000  | -0.889389000  | 6  | -0.767139000 | 0.110972000  | -2.978188000 |
| 6  | -4.434462000 | 2.953783000  | -0.794453000  | 6  | 0.155349000  | 0.154287000  | -1.980999000 |
| 6  | -0.076425000 | -1.770185000 | -0.177961000  | 6  | 1.554893000  | 0.353711000  | -2.153637000 |
| 6  | 1.861554000  | 0.548519000  | -0.096514000  | 15 | -0.504007000 | 0.024235000  | -0.305249000 |
| 6  | 2.145802000  | -1.726507000 | 1.522077000   | 6  | 2.450465000  | 0.363804000  | -1.081872000 |
| 6  | 1.757029000  | 1.905767000  | 0.201462000   | 8  | 2.153966000  | 0.180453000  | 0.114687000  |
| 6  | 2.577064000  | 2.817154000  | -0.447465000  | 8  | 3.748186000  | 0.600368000  | -1.434803000 |
| 6  | 3.488614000  | 2.378651000  | -1.403202000  | 6  | 4.724534000  | 0.438289000  | -0.410693000 |
| 6  | 3.589230000  | 1.025911000  | -1.704807000  | 6  | 5.050555000  | -1.023599000 | -0.191846000 |
| 6  | 2.783424000  | 0.106331000  | -1.044484000  | 6  | -0.166824000 | 1.525468000  | 0.609225000  |
| 6  | -0.793277000 | -2.750365000 | 0.505884000   | 6  | -2.302745000 | -0.070788000 | -0.419066000 |
| 6  | -1.526433000 | -3.692462000 | -0.205700000  | 6  | -0.081628000 | -1.506512000 | 0.522750000  |
| 6  | -1.530555000 | -3.660833000 | -1.594823000  | 6  | -2.890656000 | -1.290644000 | -0.770129000 |
| 6  | -0.813508000 | -2.680779000 | -2.275154000  | 6  | -4.267376000 | -1.389941000 | -0.900485000 |
| 6  | -0.092186000 | -1.728315000 | -1.569565000  | 6  | -5.069813000 | -0.275352000 | -0.673701000 |
| 1  | 1.281437000  | -0.811134000 | 3.607383000   | 6  | -4.492456000 | 0.936832000  | -0.319805000 |
| 1  | -0.122773000 | 0.174354000  | 4.281997000   | 6  | -3.111537000 | 1.042023000  | -0.194199000 |
| 1  | -1.872990000 | 1.129211000  | 2.681649000   | 6  | 0.846335000  | -2.381668000 | -0.038823000 |
| 1  | -2.350546000 | 2.801961000  | -1.342472000  | 6  | 1.103976000  | -3.598363000 | 0.576446000  |
| 1  | -3.246468000 | 1.293999000  | -1.500876000  | 6  | 0.449446000  | -3.936255000 | 1.756941000  |
| 1  | -5.212512000 | 2.335331000  | -0.345708000  | 6  | -0.480247000 | -3.066617000 | 2.314803000  |
| 1  | -4.312415000 | 3.850878000  | -0.186485000  | 6  | -0.759005000 | -1.857433000 | 1.690606000  |
| 1  | -4.764858000 | 3.254530000  | -1.789031000  | 6  | -0.107360000 | 2.717713000  | -0.110292000 |
| 1  | 1.681389000  | -2.507467000 | 2.122791000   | 6  | 0.104624000  | 3.916476000  | 0.560467000  |
| 1  | 2.673161000  | -2.193055000 | 0.689049000   | 6  | 0.253781000  | 3.923452000  | 1.941848000  |
| 1  | 2.858807000  | 2.180611000  | 2.119726000   | 6  | 0.193925000  | 2.730976000  | 2.656557000  |
| 1  | 1.029638000  | 2.240147000  | 0.931932000   | 6  | -0.015330000 | 1.530022000  | 1.993404000  |
| 1  | 2.499732000  | 3.870832000  | -0.213577000  | 1  | -1.825610000 | -0.000203000 | -2.805957000 |
| 1  | 4.121622000  | 3.093549000  | -1.912935000  | 1  | -0.437559000 | 0.202223000  | -4.007382000 |
| 1  | 4.296998000  | 0.683767000  | -2.448302000  | 1  | 1.929552000  | 0.511912000  | -3.156852000 |
| 1  | 2.870332000  | -0.949766000 | -1.273542000  | 1  | 4.370059000  | 0.900369000  | 0.510824000  |
| 1  | -0.785957000 | -2.769889000 | 1.591207000   | 1  | 5.601182000  | 0.983868000  | -0.758940000 |
| 1  | -2.092399000 | -4.446908000 | 0.324753000   | 1  | 4.163095000  | -1.562647000 | 0.143362000  |
| 1  | -2.098591000 | -4.396371000 | -2.149777000  | 1  | 5.410202000  | -1.477798000 | -1.116211000 |
| 1  | -0.827540000 | -2.650587000 | -3.356863000  | 1  | 5.826272000  | -1.129582000 | 0.568068000  |
| 1  | 0.435702000  | -0.941951000 | -2.092894000  | 1  | -2.267484000 | -2.159510000 | -0.946870000 |
|    |              | 2_PPh3_1     |               | 1  | -4.714538000 | -2.336035000 | -1.175702000 |
| 6  | 0.831064000  | -0.262643000 | 2.982913000   | 1  | -6.144902000 | -0.355135000 | -0.770314000 |
| 6  | -0.080677000 | 0.061990000  | 2.029849000   | 1  | -5.113721000 | 1.803999000  | -0.138508000 |
| 6  | -1.458562000 | 0.344875000  | 2.255199000   | 1  | -2.671796000 | 1.991337000  | 0.082338000  |
| 15 | 0.501958000  | -0.024656000 | 0.321274000   | 1  | 1.361374000  | -2.106224000 | -0.951354000 |
| 6  | -2.310806000 | 0.727605000  | 1.218086000   | 1  | 1.819368000  | -4.280964000 | -0.136809000 |
| 8  | -1.955748000 | 0.973800000  | 0.048304000   | 1  | 0.659350000  | -4.882577000 | 2.238698000  |
| 8  | -3.627516000 | 0.824748000  | 1.563667000   | 1  | -0.997764000 | -3.332352000 | 3.227106000  |
| 6  | -4.548444000 | 0.953103000  | 0.484252000   | 1  | -1.510043000 | -1.194929000 | 2.106020000  |
| 6  | -4.747786000 | -0.371613000 | -0.221760000  | 1  | -0.227159000 | 2.708645000  | -1.187843000 |
| 6  | 2.170972000  | -0.712746000 | 0.335050000   | 1  | 0.155453000  | 4.841773000  | 0.001765000  |
| 6  | -0.492426000 | -1.196877000 | -0.597666000  | 1  | 0.421769000  | 4.857262000  | 2.462711000  |
| 6  | 0.750017000  | 1.572741000  | -0.447049000  | 1  | 0.319128000  | 2.734914000  | 3.731425000  |
| 6  | -0.745412000 | -1.049989000 | -1.959310000  | 1  | -0.037955000 | 0.602443000  | 2.550621000  |
| 6  | -1.497936000 | -2.007430000 | -2.624938000  |    |              | 2_PPh3_3     |              |
| 6  | -2.000951000 | -3.106328000 | -1.934145000  | 6  | 0.663983000  | -0.159494000 | -2.973155000 |
| 6  | -1.751513000 | -3.249298000 | -0.574874000  | 6  | -0.206309000 | -0.035007000 | -1.936118000 |
| 6  | -0.995687000 | -2.295423000 | 0.097813000   | 6  | -1.624931000 | 0.006264000  | -2.044751000 |
| 6  | 1.467115000  | 1.652305000  | -1.640389000  | 15 | 0.542263000  | -0.021143000 | -0.293274000 |
| 6  | 1.718222000  | 2.892614000  | -2.213208000  | 6  | -2.464974000 | 0.170460000  | -0.939470000 |
| 6  | 1.282729000  | 4.049626000  | -1.577680000  | 8  | -2.098204000 | 0.351286000  | 0.237325000  |
| 6  | 0.590199000  | 3.970036000  | -0.373315000  | 8  | -3.795931000 | 0.124664000  | -1.232646000 |
| 6  | 0.313705000  | 2.732518000  | 0.189801000   | 6  | -4.688299000 | 0.2294952000 | -0.137230000 |
| 6  | 3.238152000  | 0.123078000  | 0.681779000   | 6  | -6.094911000 | 0.222701000  | -0.679175000 |

|    |              |              |              |    |              |              |              |
|----|--------------|--------------|--------------|----|--------------|--------------|--------------|
| 6  | -0.046741000 | -1.413966000 | 0.663209000  | 1  | -4.593341000 | -2.297401000 | -0.032121000 |
| 6  | 2.317012000  | -0.287402000 | -0.483341000 | 1  | -4.821463000 | 1.852898000  | -1.094181000 |
| 6  | 0.467023000  | 1.571333000  | 0.521047000  | 1  | -2.357233000 | 2.008188000  | -1.008286000 |
| 6  | 3.121062000  | 0.788576000  | -0.874089000 | 1  | 0.454040000  | -0.409616000 | 2.337800000  |
| 6  | 4.482633000  | 0.609087000  | -1.065046000 | 1  | 1.191044000  | -2.462705000 | 3.497814000  |
| 6  | 5.054664000  | -0.643099000 | -0.859987000 | 1  | 1.054680000  | -4.611913000 | -0.212116000 |
| 6  | 4.262522000  | -1.713570000 | -0.466478000 | 1  | 0.299522000  | -2.580737000 | -1.360808000 |
| 6  | 2.895738000  | -1.539098000 | -0.279825000 | 1  | 0.878582000  | -6.315466000 | 1.304368000  |
| 6  | -0.295621000 | 2.604178000  | -0.020098000 | 1  | 2.567504000  | -5.836438000 | 0.993717000  |
| 6  | -0.274505000 | 3.857982000  | 0.574109000  | 1  | 2.139096000  | -6.661874000 | 2.508497000  |
| 6  | 0.491823000  | 4.077309000  | 1.714324000  | 1  | -6.620423000 | -2.197212000 | -1.098440000 |
| 6  | 1.255364000  | 3.048199000  | 2.253214000  | 1  | -6.721779000 | -1.768247000 | 0.629545000  |
| 6  | 1.256887000  | 1.797969000  | 1.648595000  | 1  | -7.963038000 | -1.194208000 | -0.505945000 |
| 6  | -0.134958000 | -1.371330000 | 2.052118000  | 1  | 2.337790000  | 5.980881000  | 1.415598000  |
| 6  | -0.547874000 | -2.498840000 | 2.747935000  | 1  | 0.929513000  | 6.092746000  | 0.520795000  |
| 6  | -0.873261000 | -3.664377000 | 2.060901000  | 1  | 1.268086000  | 7.184528000  | 2.168310000  |
| 6  | -0.786478000 | -3.704216000 | 0.674694000  |    |              |              |              |
| 6  | -0.371804000 | -2.579545000 | -0.028828000 | 6  | -0.629752000 | 2_Pani3_2    | -0.187534000 |
| 1  | 1.731623000  | -0.242526000 | -2.848163000 | 6  | 0.343250000  |              | -0.017206000 |
| 1  | 0.278111000  | -0.190730000 | -3.986235000 | 6  | 1.738798000  |              | 0.061635000  |
| 1  | -2.065495000 | -0.123899000 | -3.025388000 | 15 | -0.234692000 |              | 0.009240000  |
| 1  | -4.498698000 | 1.256444000  | 0.344972000  | 6  | 2.713691000  |              | 0.276805000  |
| 1  | -4.509849000 | -0.485007000 | 0.606163000  | 8  | 2.517567000  |              | 0.484233000  |
| 1  | -6.265927000 | 1.008704000  | -1.415570000 | 8  | 3.993427000  |              | 0.252395000  |
| 1  | -6.276230000 | -0.741798000 | -1.154675000 | 6  | 5.025510000  |              | 0.475465000  |
| 1  | -6.814229000 | 0.347607000  | 0.130617000  | 6  | 6.343316000  |              | 0.421439000  |
| 1  | 2.677870000  | 1.764537000  | -1.034271000 | 6  | 0.514678000  |              | -1.333504000 |
| 1  | 5.097255000  | 1.445510000  | -1.370698000 | 6  | -0.099099000 |              | -0.176600000 |
| 1  | 6.118424000  | -0.781394000 | -1.004312000 | 6  | -2.000614000 |              | -0.312018000 |
| 1  | 4.705056000  | -2.687256000 | -0.302340000 | 6  | -0.771438000 |              | 1.872341000  |
| 1  | 2.287498000  | -2.379845000 | 0.026856000  | 6  | -0.733507000 |              | 3.130092000  |
| 1  | -0.899653000 | 2.421069000  | -0.900380000 | 6  | -0.033925000 |              | 4.158207000  |
| 1  | -0.860475000 | 4.662681000  | 0.149961000  | 6  | 0.621147000  |              | 3.914946000  |
| 1  | 0.499324000  | 5.054645000  | 2.179485000  | 6  | 0.596227000  |              | 2.656454000  |
| 1  | 1.858981000  | 3.220326000  | 3.134520000  | 6  | -2.517632000 |              | -1.570451000 |
| 1  | 1.880588000  | 1.005176000  | 2.045767000  | 6  | -3.887303000 |              | -1.809503000 |
| 1  | 0.093648000  | -0.459308000 | 2.588253000  | 6  | -4.759789000 |              | -0.772614000 |
| 1  | -0.623854000 | -2.464908000 | 3.826874000  | 6  | -4.251066000 |              | 0.498412000  |
| 1  | -1.198819000 | -4.540100000 | 2.607387000  | 6  | -2.891927000 |              | 0.723226000  |
| 1  | -1.043639000 | -4.607941000 | 0.137913000  | 6  | 0.783904000  |              | -1.252692000 |
| 1  | -0.300640000 | -2.606850000 | -1.110397000 | 6  | 1.320859000  |              | -2.328780000 |
|    |              | 2_Pani3_1    |              | 6  | 1.594422000  |              | -3.517860000 |
| 6  | -0.675410000 | -0.064040000 | -3.131281000 | 6  | 1.331499000  |              | -3.601521000 |
| 6  | 0.302029000  | 0.006717000  | -2.187003000 | 6  | 0.797027000  |              | -2.518005000 |
| 6  | 1.700185000  | -0.074415000 | -2.447535000 | 8  | 2.113327000  |              | -4.619628000 |
| 15 | -0.285855000 | 0.062452000  | -0.480554000 | 8  | -6.097461000 |              | -0.903436000 |
| 6  | 2.687902000  | 0.015668000  | -1.459098000 | 8  | 0.052917000  |              | 5.411985000  |
| 8  | 2.512360000  | 0.224677000  | -0.246405000 | 6  | 2.401944000  |              | -4.576084000 |
| 8  | 3.959174000  | -0.144190000 | -1.938721000 | 6  | -6.657554000 |              | -2.172366000 |
| 6  | 5.006455000  | -0.057995000 | -0.981089000 | 6  | -0.587539000 |              | 5.703950000  |
| 6  | 6.312352000  | -0.243274000 | -1.715048000 | 1  | -1.673992000 |              | -0.301087000 |
| 6  | 0.310719000  | -1.362576000 | 0.408690400  | 1  | -0.356399000 |              | -0.226994000 |
| 6  | 0.018181000  | 1.637417000  | 0.295702000  | 1  | 2.060712000  |              | -0.077706000 |
| 6  | -2.075562000 | -0.065020000 | -0.478346000 | 1  | 4.485421000  |              | 1.445421000  |
| 6  | -0.630951000 | 1.957392000  | 1.494382000  | 1  | 4.976684000  |              | -0.286620000 |
| 6  | -0.448374000 | 3.193589000  | 2.080309000  | 1  | 6.482142000  |              | -0.551649000 |
| 6  | 0.368311000  | 4.146612000  | 1.462239000  | 1  | 6.386779000  |              | 1.189777000  |
| 6  | 0.996998000  | 3.846293000  | 0.252788000  | 1  | 7.166422000  |              | 0.586525000  |
| 6  | 0.823472000  | 2.592305000  | -0.315925000 | 1  | -1.344467000 |              | 1.086067000  |
| 6  | -2.728155000 | -1.263818000 | -0.208793000 | 1  | -1.256188000 |              | 3.298854000  |
| 6  | -4.115022000 | -1.354002000 | -0.252294000 | 1  | 1.148048000  |              | 4.730469000  |
| 6  | -4.866519000 | -0.225855000 | -0.576947000 | 1  | 1.113291000  |              | 2.469688000  |
| 6  | -4.220730000 | 0.987182000  | -0.847821000 | 1  | -1.853607000 |              | -2.386327000 |
| 6  | -2.845959000 | 1.064495000  | -0.795305000 | 1  | -4.258339000 |              | -2.796203000 |
| 6  | 0.563477000  | -1.332301000 | 1.781766000  | 1  | -4.943819000 |              | 1.291687000  |
| 6  | 0.982780000  | -2.472371000 | 2.435897000  | 1  | -2.510590000 |              | 1.711029000  |
| 6  | 1.162695000  | -3.665598000 | 1.726794000  | 1  | 0.597550000  |              | -0.332311000 |
| 6  | 0.915378000  | -3.703303000 | 0.355512000  | 1  | 1.530268000  |              | -2.247198000 |
| 6  | 0.490162000  | -2.549111000 | -0.293682000 | 1  | 1.558196000  |              | -4.523550000 |
| 8  | 1.580176000  | -4.727242000 | 2.444276000  | 1  | 0.595509000  |              | -2.589429000 |
| 8  | -6.209393000 | -0.212565000 | -0.647042000 | 1  | 3.144080000  |              | -3.806639000 |
| 8  | 0.486966000  | 5.328802000  | 2.094441000  | 1  | 1.498413000  |              | -4.389621000 |
| 6  | 1.799806000  | -5.948515000 | 1.762580000  | 1  | 2.804824000  |              | -5.550534000 |
| 6  | -6.906625000 | -1.418442000 | -0.388401000 | 1  | -6.302804000 |              | -2.927529000 |
| 6  | 1.305054000  | 6.324327000  | 1.505767000  | 1  | -6.417961000 |              | -2.484162000 |
| 1  | -1.728004000 | -0.068685000 | -2.896662000 | 1  | -7.733821000 |              | -2.063763000 |
| 1  | -0.398559000 | -0.121965000 | -4.178480000 | 1  | -1.665578000 |              | 5.543692000  |
| 1  | 2.011620000  | -0.235124000 | -3.472756000 | 1  | -0.181455000 |              | 5.092842000  |
| 1  | 4.968796000  | 0.911532000  | -0.479280000 | 1  | -0.392334000 |              | 6.752247000  |
| 1  | 4.870693000  | -0.826318000 | -0.216592000 |    |              | 2_Pani3_3    |              |
| 1  | 6.343319000  | -1.215431000 | -2.208342000 | 6  | 0.793089000  |              | -0.354162000 |
| 1  | 6.443543000  | 0.531666000  | -2.471168000 | 6  | -0.135433000 |              | 0.120279000  |
| 1  | 7.146649000  | -0.185894000 | -1.015345000 | 6  | -1.437112000 |              | 0.582666000  |
| 1  | -1.290335000 | 1.237434000  | 1.966087000  | 15 | 0.315313000  |              | 0.005826000  |
| 1  | -0.937625000 | 3.450041000  | 3.010781000  | 6  | -2.328980000 |              | 1.128991000  |
| 1  | 1.621622000  | 4.573514000  | -0.245280000 | 8  | -2.078436000 |              | 1.402329000  |
| 1  | 1.321177000  | 2.355276000  | -1.248397000 | 8  | -3.581014000 |              | 1.365217000  |
| 1  | -2.157792000 | -2.148505000 | 0.044170000  | 6  | -4.582183000 |              | 1.700831000  |

|    |              |              |              |    |              |              |              |
|----|--------------|--------------|--------------|----|--------------|--------------|--------------|
| 6  | -5.046020000 | 0.476020000  | 0.485497000  | 1  | 4.204903000  | 2.106303000  | 0.229888000  |
| 6  | -0.924620000 | -0.938612000 | -0.335162000 | 1  | 5.453056000  | 1.753949000  | 1.435890000  |
| 6  | 0.722376000  | 1.583275000  | -0.189897000 | 1  | 4.056698000  | -0.324143000 | -0.327262000 |
| 6  | 1.844496000  | -0.923840000 | 0.391159000  | 1  | 5.706410000  | 0.274174000  | -0.571599000 |
| 6  | 1.376942000  | 1.633744000  | -1.425948000 | 1  | 5.318498000  | -0.674966000 | 0.870889000  |
| 6  | 1.742116000  | 2.846470000  | -1.974763000 | 1  | 1.102648000  | -2.321194000 | 1.289505000  |
| 6  | 1.481874000  | 4.033503000  | -1.281950000 | 1  | 2.679987000  | -3.849698000 | 0.108264000  |
| 6  | 0.853817000  | 3.990667000  | -0.035984000 | 1  | 2.214176000  | -1.577116000 | -3.482081000 |
| 6  | 0.471153000  | 2.767148000  | 0.495486000  | 1  | 0.659308000  | -0.027620000 | -2.316837000 |
| 6  | 1.855899000  | -2.278326000 | 0.072062000  | 1  | -1.201069000 | -2.783712000 | -0.240403000 |
| 6  | 3.046439000  | -2.993106000 | 0.006947000  | 1  | -3.432394000 | -3.862051000 | -0.305241000 |
| 6  | 4.252213000  | -2.344608000 | 0.269566000  | 1  | -5.268670000 | -0.188911000 | 0.880944000  |
| 6  | 4.253758000  | -0.981870000 | 0.591834000  | 1  | -3.045213000 | 0.914297000  | 0.942936000  |
| 6  | 3.066698000  | -0.283582000 | 0.647532000  | 1  | 0.153382000  | 2.666445000  | 1.355102000  |
| 6  | -1.265005000 | -0.679718000 | -1.664785000 | 1  | -0.462315000 | 4.884939000  | 0.388237000  |
| 6  | -2.227051000 | -1.441057000 | -2.296182000 | 1  | -2.208313000 | 2.942686000  | -2.996760000 |
| 6  | -2.873834000 | -2.473322000 | -1.606121000 | 1  | -1.666513000 | 0.720640000  | -2.010683000 |
| 6  | -2.540776000 | -2.737594000 | -0.278625000 |    |              |              |              |
| 6  | -1.567461000 | -1.965408000 | 0.347670000  |    |              |              |              |
| 8  | -3.807872000 | -3.156746000 | -2.296874000 | 6  | 0.657584000  | -0.199197000 | -3.078860000 |
| 8  | 5.453656000  | -2.947752000 | 0.229043000  | 6  | -0.268815000 | -0.021773000 | -2.097600000 |
| 8  | 1.875189000  | 5.171783000  | -1.882919000 | 6  | -1.674025000 | 0.090391000  | -2.296954000 |
| 8  | -4.512551000 | -4.185843000 | -1.627312000 | 15 | 0.374649000  | -0.034641000 | -0.413879000 |
| 6  | 5.501263000  | -4.324959000 | -0.100121000 | 6  | -2.571500000 | -3.102500000 | -1.247816000 |
| 6  | 1.624786000  | 6.399686000  | -1.222497000 | 8  | -2.267763000 | 0.487664000  | -0.052221000 |
| 1  | 1.733312000  | -0.782224000 | 2.840425000  | 8  | -3.881509000 | 0.327563000  | -1.622231000 |
| 1  | 0.586076000  | -0.325739000 | 4.214983000  | 6  | -4.831477000 | 0.554509000  | -0.586771000 |
| 1  | -1.769512000 | 0.440768000  | 3.648038000  | 6  | -6.201613000 | 0.563548000  | -1.219132000 |
| 1  | -5.399101000 | 2.132494000  | 1.824246000  | 6  | -0.350926000 | -1.385106000 | 0.505186000  |
| 1  | -4.200405000 | 2.459314000  | 0.561934000  | 6  | 2.138517000  | -0.395101000 | -0.483852000 |
| 1  | -4.217351000 | 0.049146000  | -0.083155000 | 6  | 0.331616000  | 1.564626000  | 0.384167000  |
| 1  | -5.426187000 | -0.280285000 | 1.174376000  | 6  | 3.021414000  | 0.631421000  | -0.837825000 |
| 1  | -5.844129000 | 0.740453000  | -0.210066000 | 6  | 4.380970000  | 0.389690000  | -0.939793000 |
| 1  | 1.608268000  | 0.717438000  | -1.957444000 | 6  | 4.840030000  | -0.889526000 | -0.674999000 |
| 1  | 2.240025000  | 2.900226000  | -2.933910000 | 6  | 4.000390000  | -1.926467000 | -0.317296000 |
| 1  | 0.654616000  | 4.896839000  | 0.517384000  | 6  | 2.638736000  | -1.670797000 | -0.225180000 |
| 1  | -0.031307000 | 2.733851000  | 1.454671000  | 6  | -0.352963000 | -0.267965000 | -0.202877000 |
| 1  | 0.928274000  | -2.795851000 | -0.136332000 | 6  | -0.313878000 | 3.885598000  | 0.377302000  |
| 1  | 3.022469000  | -4.042443000 | -0.249236000 | 6  | 0.401231000  | 4.046109000  | 1.551176000  |
| 1  | 5.199638000  | -0.494591000 | 0.789273000  | 6  | 1.092771000  | 3.013750000  | 2.157680000  |
| 1  | 3.081237000  | 0.770858000  | 0.897132000  | 6  | 1.065821000  | 1.765298000  | 1.553583000  |
| 1  | -0.795461000 | 0.136332000  | -2.199868000 | 6  | -0.547241000 | -1.323406000 | -1.882739000 |
| 1  | -2.508756000 | -1.246267000 | -3.322777000 | 6  | -1.074852000 | -2.412454000 | 2.558466000  |
| 1  | -3.031164000 | -3.525763000 | 0.274186000  | 6  | -1.398267000 | -3.544717000 | 1.831110000  |
| 1  | -1.314184000 | -2.169197000 | 1.382235000  | 6  | -1.218231000 | -3.634701000 | 0.464096000  |
| 1  | -3.835897000 | -4.978204000 | -1.299106000 | 9  | -0.687430000 | -2.538370000 | -0.202325000 |
| 1  | -5.056376000 | -3.792734000 | -0.765188000 | 9  | -1.912169000 | -4.599524000 | -4.828530000 |
| 1  | -5.220332000 | -4.592451000 | -2.344310000 | 9  | 0.433077000  | 5.259700000  | 2.120905000  |
| 1  | 4.949593000  | -4.922021000 | 0.629124000  | 1  | 6.155694000  | -1.128754000 | -0.764197000 |
| 1  | 5.095955000  | -4.503910000 | -1.098366000 | 1  | 1.708895000  | -0.339892000 | -2.886344000 |
| 1  | 6.549227000  | -4.610348000 | -0.080329000 | 1  | 0.335355000  | -0.217389000 | -4.114135000 |
| 1  | 0.554580000  | 6.549863000  | -1.064847000 | 1  | -2.058909000 | -0.027731000 | -3.302133000 |
| 1  | 2.143522000  | 6.442815000  | -0.262426000 | 1  | -4.748514000 | -0.232515000 | 0.165960000  |
| 1  | 2.006126000  | 7.181970000  | -1.872874000 | 1  | -4.616610000 | 1.504603000  | -0.093003000 |
|    |              |              |              | 1  | -6.963254000 | 0.732348000  | -0.457466000 |
|    |              |              |              | 1  | -6.277914000 | 1.356446000  | -1.963936000 |
| 6  | -0.801946000 | -0.380533000 | 3.085220000  | 1  | -6.408099000 | -0.389813000 | -1.706595000 |
| 6  | 0.127487000  | 0.043392000  | 2.189660000  | 1  | 2.642447000  | 1.625829000  | -1.040961000 |
| 6  | 1.464778000  | 0.428809000  | 2.493295000  | 1  | 5.078475000  | 1.168866000  | -1.214257000 |
| 15 | -0.365483000 | -0.037328000 | 0.453958000  | 1  | 4.408202000  | -2.907362000 | -0.115501000 |
| 6  | 2.337059000  | 0.911062000  | 1.515224000  | 1  | 1.972088000  | -2.475773000 | 0.054008000  |
| 8  | 2.025843000  | 1.167533000  | 0.335217000  | 1  | -0.913686000 | 2.469372000  | -1.115564000 |
| 8  | 3.620746000  | 1.099007000  | 1.936577000  | 1  | -0.913686000 | 4.729461000  | -0.060657000 |
| 6  | 4.584314000  | 1.349732000  | 0.917300000  | 1  | 1.645462000  | 3.193640000  | 3.069311000  |
| 6  | 4.938202000  | 0.076810000  | 0.177589000  | 1  | 1.628661000  | 0.950197000  | 1.993299000  |
| 6  | -0.701094000 | 1.559318000  | -0.276277000 | 1  | -0.313041000 | -0.420903000 | 2.432055000  |
| 6  | 0.769385000  | -1.088357000 | -0.444594000 | 1  | -1.246120000 | -2.389843000 | 3.625853000  |
| 6  | -1.966504000 | -0.860158000 | 0.358846000  | 1  | -1.491853000 | -4.540000000 | -0.060070000 |
| 6  | 1.341347000  | -2.156845000 | 0.245117000  | 1  | -0.534994000 | -2.583828000 | -1.274505000 |
| 6  | 2.219528000  | -3.015851000 | -0.403324000 |    |              |              |              |
| 6  | 2.502711000  | -2.778252000 | -1.734670000 | 6  | -0.657933000 | -0.198884000 | -3.078886000 |
| 6  | 1.951327000  | -1.724611000 | -2.443613000 | 6  | 0.268479000  | -0.021883000 | -2.099706000 |
| 6  | 1.077928000  | -0.872549000 | -1.785752000 | 6  | 1.673688000  | 0.090117000  | -2.296782000 |
| 6  | -2.080568000 | -2.205361000 | 0.009180000  | 15 | -0.375150000 | -0.034768000 | -0.413906000 |
| 6  | -3.323918000 | -2.821895000 | -0.030682000 | 6  | 2.571338000  | 0.310065000  | -1.247732000 |
| 6  | -4.438959000 | -2.071592000 | 0.288682000  | 8  | 2.267986000  | 0.487868000  | -0.052171000 |
| 6  | -4.366580000 | -0.734759000 | 0.641207000  | 8  | 3.881278000  | 0.327030000  | -1.622558000 |
| 6  | -3.120437000 | -0.131437000 | 0.669951000  | 6  | 4.831462000  | 0.554652000  | -0.587448000 |
| 6  | -0.367977000 | 2.727541000  | 0.407899000  | 6  | 6.201452000  | 0.563155000  | -1.220133000 |
| 6  | -0.701439000 | 3.962811000  | -0.123310000 | 6  | -0.331971000 | 1.564527000  | 0.383963000  |
| 6  | -1.349079000 | 3.999201000  | -1.346115000 | 6  | -2.138923000 | -0.395424000 | -0.483797000 |
| 6  | -1.694320000 | 2.859904000  | -2.049258000 | 6  | 0.350874000  | -1.384827000 | 0.505354000  |
| 6  | -1.377278000 | 1.628502000  | -1.494252000 | 6  | -2.638985000 | -1.671131000 | -0.224875000 |
| 9  | -1.663409000 | 5.193765000  | -1.868548000 | 6  | -4.000621000 | -1.926916000 | -0.316772000 |
| 9  | -5.642824000 | -2.659448000 | 0.250134000  | 6  | -4.840386000 | -0.890072000 | -0.674517000 |
| 9  | 3.351689000  | -3.652085000 | -2.368869000 | 6  | -4.381472000 | 0.389146000  | -0.939579000 |
| 1  | -1.774847000 | -0.750004000 | 2.803212000  | 6  | -3.021925000 | 0.630992000  | -0.837796000 |
| 1  | -0.561620000 | -0.370896000 | 4.142591000  | 6  | 0.548450000  | -1.322448000 | 1.882709000  |
| 1  | 1.828527000  | 0.275103000  | 3.501306000  | 6  | 1.076646000  | -2.411181000 | 2.558460000  |

2\_Ppfp3\_2

2\_Ppfp3\_1

2\_Ppfp3\_3

|    |              |              |              |    |              |              |              |
|----|--------------|--------------|--------------|----|--------------|--------------|--------------|
| 6  | 1.399388000  | -3.543780000 | 1.831316000  | 1  | 0.784105000  | 2.977011000  | -0.822874000 |
| 6  | 1.218133000  | -3.634461000 | 0.464503000  | 1  | -0.914307000 | 2.510084000  | -0.893279000 |
| 6  | 0.686753000  | -2.538425000 | -0.201927000 | 1  | -1.400665000 | -2.232838000 | -1.052273000 |
| 6  | 0.352608000  | 2.627795000  | -0.203220000 | 1  | 0.103542000  | -3.059039000 | -0.655151000 |
| 6  | 0.313738000  | 3.885442000  | 0.376927000  | 1  | -2.456332000 | -3.109051000 | 0.999008000  |
| 6  | -0.401145000 | 4.046004000  | 1.550943000  | 1  | -1.829853000 | -4.435109000 | 0.024499000  |
| 6  | -1.092706000 | 3.013728000  | 2.157584000  | 1  | -1.245135000 | -4.750958000 | 2.428274000  |
| 6  | -1.065946000 | 1.765267000  | 1.553522000  | 1  | 0.207339000  | -4.525786000 | 1.459417000  |
| 9  | -0.432801000 | 5.259606000  | 2.120664000  | 1  | -1.198833000 | -2.346873000 | 3.066666000  |
| 9  | 1.913948000  | -4.598247000 | 2.483105000  | 1  | 0.305644000  | -3.138036000 | 3.527312000  |
| 9  | -6.156043000 | -1.129426000 | -0.763539000 | 1  | 1.419443000  | -2.261181000 | 1.508791000  |
| 1  | -1.709259000 | -0.339604000 | -2.886419000 | 1  | 0.738293000  | -0.944177000 | 2.459726000  |
| 1  | -0.335702000 | -0.216742000 | -4.114170000 |    |              | 2_PCy3_2     |              |
| 1  | 2.058639000  | -0.028219000 | -3.301921000 | 6  | -0.397734000 | 0.201540000  | -2.977481000 |
| 1  | 4.616749000  | 1.505122000  | -0.094309000 | 6  | 0.439045000  | 0.239795000  | -1.907556000 |
| 1  | 4.748618000  | -0.231824000 | 0.165865000  | 6  | 1.837808000  | 0.501070000  | -2.032295000 |
| 1  | 6.277609000  | 1.355483000  | -1.965563000 | 15 | -0.383577000 | 0.042837000  | -0.309504000 |
| 1  | 6.963324000  | 0.732490000  | -0.458814000 | 6  | 2.768768000  | 0.588816000  | -0.996881000 |
| 1  | 6.407766000  | -0.390591000 | -1.706927000 | 8  | 2.571692000  | 0.454022000  | 0.225468000  |
| 1  | -1.972250000 | -2.476014000 | 0.054402000  | 8  | 4.040520000  | 0.857159000  | -1.445739000 |
| 1  | -4.408338000 | -2.907755000 | -0.114801000 | 6  | 5.085315000  | 0.753623000  | -0.488171000 |
| 1  | -5.079083000 | 1.168219000  | -1.214069000 | 6  | 5.476403000  | -0.691214000 | -0.259019000 |
| 1  | -2.643039000 | 1.625403000  | -1.041098000 | 6  | -0.213866000 | 1.588902000  | 0.635617000  |
| 1  | 0.314799000  | -0.419650000 | 2.431770000  | 6  | -2.156767000 | -0.338810000 | -0.468344000 |
| 1  | 1.248916000  | -2.388106000 | 3.625677000  | 6  | 0.313694000  | -1.310811000 | 0.709497000  |
| 1  | 1.491358000  | -4.539995000 | -0.059460000 | 6  | -3.121029000 | 0.744376000  | -0.966546000 |
| 1  | 0.533373000  | -2.584314000 | -1.273963000 | 6  | -4.540962000 | 0.347023000  | -0.567945000 |
| 1  | 0.913175000  | 2.469111000  | -1.115999000 | 6  | -4.916581000 | -1.016078000 | -1.138186000 |
| 1  | 0.828628000  | 4.729265000  | -0.061108000 | 6  | -3.908177000 | -2.085445000 | -0.732410000 |
| 1  | -1.645298000 | 3.193722000  | 3.069257000  | 6  | -2.499799000 | -1.672923000 | -1.148009000 |
| 1  | -1.628763000 | 0.950181000  | 1.993320000  | 6  | -0.666522000 | 1.698371000  | 1.669646000  |
|    |              | 2_PCy3_1     |              | 6  | 0.102462000  | -2.956175000 | 2.575918000  |
| 6  | 0.393988000  | -0.161179000 | -2.986622000 | 6  | 0.852409000  | -3.998407000 | 1.757546000  |
| 6  | -0.425374000 | 0.082293000  | -1.930404000 | 6  | 1.804004000  | -3.321085000 | 0.780929000  |
| 6  | -1.831604000 | 0.286540000  | -2.077856000 | 6  | 1.060577000  | -2.352255000 | -0.131737000 |
| 15 | 0.384121000  | -0.011071000 | -0.316578000 | 6  | -0.247099000 | 2.847082000  | -0.238665000 |
| 8  | -2.754532000 | 0.543715000  | -1.063377000 | 6  | 0.061626000  | 4.073661000  | 0.613131000  |
| 8  | -2.538671000 | 0.681710000  | 0.155462000  | 6  | -0.912449000 | 4.190411000  | 1.778329000  |
| 8  | -4.040866000 | 0.664482000  | -1.534718000 | 6  | -0.860171000 | 2.936825000  | 2.641358000  |
| 6  | -5.070128000 | 0.752149000  | -0.559146000 | 6  | -1.183650000 | 1.693619000  | 1.817747000  |
| 6  | -5.424480000 | -0.614054000 | -0.010809000 | 1  | -1.454491000 | 0.020180000  | -2.903257000 |
| 6  | -0.359112000 | -1.373050000 | 0.635628000  | 1  | 0.002817000  | 0.368073000  | -3.972168000 |
| 6  | 2.177418000  | -0.306107000 | -0.433761000 | 1  | 2.205768000  | 0.647571000  | -3.041715000 |
| 6  | 0.204923000  | 1.521577000  | 0.669578000  | 1  | 5.919211000  | 1.318910000  | -0.904685000 |
| 6  | 2.677997000  | -1.676512000 | -0.905786000 | 1  | 4.778453000  | 1.224446000  | 0.446265000  |
| 6  | 4.138700000  | -1.830771000 | -0.486164000 | 1  | 5.795696000  | -1.154031000 | -1.193884000 |
| 6  | 5.003114000  | -0.709738000 | -1.051578000 | 1  | 6.298467000  | -0.755838000 | 0.455641000  |
| 6  | 4.458336000  | 0.660359000  | -0.663183000 | 1  | 4.628297000  | -1.251822000 | 0.137843000  |
| 6  | 3.006080000  | 0.797730000  | -1.108588000 | 1  | 0.802068000  | 1.034380000  | 1.034380000  |
| 6  | 1.346576000  | 1.830438000  | 1.647158000  | 1  | -2.390972000 | -0.469374000 | 0.600138000  |
| 6  | 0.958146000  | 3.026236000  | 2.512902000  | 1  | 1.063232000  | -0.790365000 | 1.312041000  |
| 6  | 0.660184000  | 4.247260000  | 1.653174000  | 1  | -2.879665000 | 1.722395000  | -0.553319000 |
| 6  | -0.450779000 | 3.938155000  | 0.658875000  | 1  | -3.062163000 | 0.831876000  | -2.053796000 |
| 6  | -0.094322000 | 2.739019000  | -0.211984000 | 1  | -4.600820000 | 0.312562000  | 0.526517000  |
| 6  | -0.775904000 | -2.571850000 | -0.223889000 | 1  | -5.247378000 | 1.107796000  | -0.905087000 |
| 6  | -1.535281000 | -3.578650000 | 0.633839000  | 1  | -5.921709000 | -1.297312000 | -0.818106000 |
| 6  | -0.697136000 | -4.024892000 | 1.824572000  | 1  | -4.934586000 | -0.948619000 | -2.231804000 |
| 6  | -0.295694000 | -2.824852000 | 2.671654000  | 1  | -3.932885000 | -2.222578000 | 0.355459000  |
| 6  | 0.480891000  | -1.806424000 | 1.841898000  | 1  | -4.166875000 | -3.044113000 | -1.185713000 |
| 1  | 1.447925000  | -0.350556000 | -2.893912000 | 1  | -1.777593000 | -2.452151000 | -0.905471000 |
| 1  | -0.021205000 | -0.178534000 | -3.989070000 | 1  | -2.475134000 | -1.550402000 | -2.232685000 |
| 1  | -2.217942000 | 0.213067000  | -3.088429000 | 1  | -1.202091000 | 1.277954000  | 2.277954000  |
| 1  | -4.762368000 | 1.423095000  | 0.243386000  | 1  | -1.416890000 | -2.568300000 | 1.114291000  |
| 1  | -5.922839000 | 1.194869000  | -1.074255000 | 1  | 0.819958000  | -2.383290000 | 3.173802000  |
| 1  | -4.559843000 | -1.055691000 | 0.486902000  | 1  | -0.588663000 | -3.435565000 | 3.271997000  |
| 1  | -6.237189000 | -0.535659000 | 0.713131000  | 1  | 1.396948000  | -4.680073000 | 2.413954000  |
| 1  | -5.742852000 | -1.278689000 | -0.815201000 | 1  | 0.129086000  | -4.600448000 | 1.195177000  |
| 1  | -1.279018000 | -0.911240000 | 1.009834000  | 1  | 2.335495000  | -4.061825000 | 0.180269000  |
| 1  | 2.420734000  | -0.258137000 | 0.639784000  | 1  | 2.558704000  | -2.758956000 | 1.344338000  |
| 1  | -0.695326000 | 1.322035000  | 1.257092000  | 1  | 0.347140000  | -2.907321000 | -0.751408000 |
| 1  | 2.085594000  | -2.487814000 | -0.485713000 | 1  | 1.760283000  | -1.855646000 | -0.804710000 |
| 1  | 2.600705000  | -1.752801000 | -1.992888000 | 1  | 0.481106000  | 2.754297000  | -1.046562000 |
| 1  | 4.191424000  | -1.812349000 | 0.609096000  | 1  | -1.232018000 | 2.967622000  | -0.699476000 |
| 1  | 4.516326000  | -2.802471000 | -0.809690000 | 1  | 1.080923000  | 3.984127000  | 1.005384000  |
| 1  | 6.035513000  | -0.820764000 | -0.714487000 | 1  | 0.032320000  | 4.971054000  | -0.007723000 |
| 1  | 5.011718000  | -0.786156000 | -2.144710000 | 1  | -0.688424000 | 5.075004000  | 2.377660000  |
| 1  | 4.510767000  | 0.784014000  | 0.425343000  | 1  | -1.928954000 | 4.316469000  | 1.386370000  |
| 1  | 5.063504000  | 1.451652000  | -1.109252000 | 1  | 0.146019000  | 2.832791000  | 3.061859000  |
| 1  | 2.620713000  | 1.792044000  | -0.884456000 | 1  | -1.555253000 | 3.013910000  | 3.479704000  |
| 1  | 2.961402000  | 0.681953000  | -2.193194000 | 1  | -2.215997000 | 1.763404000  | 1.459775000  |
| 1  | 1.566698000  | 0.971079000  | 2.281974000  | 1  | -1.117320000 | 0.804035000  | 2.446629000  |
| 1  | 2.264437000  | 2.075310000  | 1.105167000  |    |              | 2_PCy3_3     |              |
| 1  | 0.066919000  | 2.770357000  | 3.096518000  | 6  | -0.268631000 | 0.217485000  | -2.948817000 |
| 1  | 1.759560000  | 3.239927000  | 3.222917000  | 6  | 0.507817000  | 0.090514000  | -1.840622000 |
| 1  | 0.388052000  | 5.098607000  | 2.280278000  | 6  | 1.935035000  | 0.113411000  | -1.893442000 |
| 1  | 1.566626000  | 4.527625000  | 1.103911000  | 15 | -0.413085000 | 0.031670000  | -0.286872000 |
| 1  | -0.658696000 | 4.804931000  | 0.028538000  | 6  | 2.826172000  | 0.002748000  | -0.823375000 |
| 1  | -1.371718000 | 3.708420000  | 1.207195000  | 8  | 2.569566000  | -0.147479000 | 0.385815000  |



|    |              |              |              |    |              |              |              |
|----|--------------|--------------|--------------|----|--------------|--------------|--------------|
| 8  | 4.139520000  | 0.066619000  | -1.217833000 | 1  | 3.993434000  | 1.543623000  | -1.641444000 |
| 6  | 5.111698000  | -0.046466000 | -0.189000000 | 1  | 5.783572000  | 2.502912000  | -0.171544000 |
| 6  | 6.472967000  | 0.032115000  | -0.837231000 | 1  | 6.351014000  | 0.868069000  | 0.198166000  |
| 6  | 0.012202000  | 1.511814000  | 0.680622000  | 1  | 6.480712000  | 1.498189000  | -1.449499000 |
| 6  | -2.219227000 | -0.016234000 | -0.521680000 | 1  | -2.339378000 | -1.519267000 | -1.212843000 |
| 6  | -0.021157000 | -1.438424000 | 0.733507000  | 1  | -2.574057000 | 0.200060000  | 1.525508000  |
| 6  | -2.944891000 | 1.239041000  | -1.019788000 | 1  | 0.296452000  | 1.479364000  | -1.143340000 |
| 6  | -4.435055000 | 1.093956000  | -0.716635000 | 1  | -1.344427000 | 1.086421000  | -1.656980000 |
| 6  | -5.015959000 | -0.161886000 | -1.355443000 | 1  | -1.186858000 | -2.112851000 | -1.144276000 |
| 6  | -4.246083000 | -1.405421000 | -0.925481000 | 1  | 0.322539000  | -1.354122000 | -1.683393000 |
| 6  | -2.765103000 | -1.251398000 | -1.254766000 | 1  | -2.274661000 | 2.263601000  | 0.357987000  |
| 6  | -1.148964000 | -1.946964000 | 1.641897000  | 1  | -0.644589000 | 2.580809000  | 0.935668000  |
| 6  | -0.608014000 | -3.049674000 | 2.548343000  | 1  | -3.442722000 | 0.570793000  | -0.740847000 |
| 6  | -0.035800000 | -4.198423000 | 1.728950000  | 1  | -3.082268000 | -1.077405000 | -1.218690000 |
| 6  | 1.063088000  | -3.694607000 | 0.803363000  | 1  | 1.499892000  | -2.253266000 | 0.307767000  |
| 6  | 0.550213000  | -2.585741000 | -0.107725000 | 1  | 0.010559000  | -2.971731000 | 0.903883000  |
| 6  | 0.201907000  | 2.770326000  | -0.174031000 | 1  | -4.674526000 | -1.928500000 | 0.492514000  |
| 6  | 0.694440000  | 3.917903000  | 0.701756000  | 1  | -5.025489000 | -0.284762000 | 0.990635000  |
| 6  | -0.267196000 | 4.178534000  | 1.853347000  | 1  | -5.540895000 | -1.418978000 | -1.813163000 |
| 6  | -0.429787000 | 2.924119000  | 2.700969000  | 1  | -6.780287000 | -1.116686000 | -0.594535000 |
| 6  | -0.936962000 | 1.757903000  | 1.857793000  | 1  | -5.897034000 | 0.232959000  | -1.309373000 |
| 1  | -1.343262000 | 0.228516000  | -2.927198000 | 1  | -0.115933000 | -4.398624000 | -1.148777000 |
| 1  | 0.203715000  | 0.324720000  | -3.919920000 | 1  | 1.375782000  | -3.682641000 | -1.731020000 |
| 1  | 2.368180000  | 0.234712000  | -2.880281000 | 1  | 1.094086000  | -5.288733000 | 0.867657000  |
| 1  | 4.975769000  | 0.756414000  | 0.539600000  | 1  | 1.834898000  | -5.881879000 | -0.620244000 |
| 1  | 4.981677000  | -0.992646000 | 0.341559000  | 1  | 2.592127000  | -4.567501000 | 0.281684000  |
| 1  | 6.598482000  | 0.982513000  | -1.357263000 | 1  | -0.191160000 | 3.949010000  | -1.092573000 |
| 1  | 7.254229000  | -0.052163000 | -0.081202000 | 1  | -1.808596000 | 3.621174000  | -1.686180000 |
| 1  | 6.603616000  | -0.775456000 | -1.558505000 | 1  | -1.725764000 | 5.855711000  | -0.552811000 |
| 1  | 0.995003000  | 1.243492000  | 1.083654000  | 1  | -2.784545000 | 4.757447000  | 0.333836000  |
| 1  | -2.519246000 | -0.127690000 | 0.532400000  | 1  | -1.157485000 | 5.085488000  | 0.929533000  |
| 1  | 0.788501000  | -1.076056000 | 1.372975000  |    |              | 2_PBu3_2     |              |
| 1  | -2.560407000 | 2.139179000  | -0.542760000 | 6  | 0.836358000  | 0.611711000  | 2.456218000  |
| 1  | -2.801864000 | 1.359474000  | -2.096145000 | 6  | 0.027022000  | 0.237612000  | 1.430608000  |
| 1  | -4.567041000 | 1.040864000  | 0.370685000  | 6  | -1.319289000 | -0.204120000 | 1.586724000  |
| 1  | -4.970261000 | 1.980279000  | -1.062271000 | 15 | 0.756573000  | 0.361891000  | -0.223212000 |
| 1  | -6.073828000 | -0.260333000 | -1.104374000 | 6  | -2.165986000 | -0.402735000 | 0.498875000  |
| 1  | -4.951454000 | -0.068332000 | -2.445377000 | 8  | -1.862054000 | -0.237029000 | -0.701377000 |
| 1  | -4.358472000 | -1.553494000 | 0.155427000  | 8  | -3.426649000 | -0.813682000 | 0.821682000  |
| 1  | -4.648126000 | -2.292792000 | -1.417734000 | 6  | -4.324725000 | -1.009477000 | -0.263686000 |
| 1  | -2.212922000 | -2.154798000 | -0.995917000 | 6  | -5.650005000 | -1.335433000 | 0.313543000  |
| 1  | -2.658613000 | -1.118068000 | -2.333074000 | 6  | 2.514398000  | 0.737132000  | -0.040392000 |
| 1  | -1.561551000 | -1.140608000 | 2.250345000  | 6  | 0.759365000  | -1.158108000 | -1.195397000 |
| 1  | -1.970412000 | -2.354765000 | 1.045652000  | 6  | 0.120829000  | 1.761226000  | -1.169960000 |
| 1  | 0.180569000  | -2.633559000 | 3.185063000  | 6  | 0.591814000  | -2.425203000 | -0.361504000 |
| 1  | -1.402764000 | -3.403942000 | 3.207838000  | 6  | 3.390107000  | -0.383187000 | 0.524288000  |
| 1  | 0.345060000  | -4.982989000 | 2.385813000  | 6  | -0.572801000 | 2.804148000  | -0.299833000 |
| 1  | -0.837283000 | -4.642335000 | 1.126837000  | 6  | 4.790598000  | 0.112286000  | 0.873877000  |
| 1  | 1.467065000  | -4.511090000 | 0.201657000  | 6  | 5.535945000  | 0.689545000  | -0.321001000 |
| 1  | 1.888416000  | -3.296924000 | 1.405349000  | 6  | -1.025494000 | 4.005250000  | -1.118152000 |
| 1  | -0.229894000 | -2.984638000 | -0.766006000 | 6  | -1.727707000 | 5.044999000  | -0.258748000 |
| 1  | 1.355154000  | -2.215331000 | -0.742639000 | 6  | 0.851405000  | -3.673959000 | -1.192443000 |
| 1  | 0.918420000  | 2.568901000  | -0.972400000 | 6  | 0.648963000  | -4.946560000 | -0.385107000 |
| 1  | -0.740376000 | 3.059774000  | -0.647777000 | 1  | 1.860167000  | 0.927729000  | 2.333495000  |
| 1  | 1.677958000  | 3.656549000  | 1.108306000  | 1  | 0.448938000  | 0.597857000  | 3.469404000  |
| 1  | 0.824333000  | 4.815428000  | 0.094124000  | 1  | -1.705586000 | -0.334772000 | 2.590044000  |
| 1  | 0.085998000  | 5.009669000  | 2.466837000  | 1  | -4.425516000 | -0.081115000 | -0.830422000 |
| 1  | -1.244041000 | 4.468420000  | 1.448235000  | 1  | -3.923516000 | -1.765209000 | -0.942583000 |
| 1  | 0.540600000  | 2.655452000  | 3.132532000  | 1  | -6.371808000 | -1.605892000 | -0.487402000 |
| 1  | -1.115391000 | 3.102758000  | 3.531566000  | 1  | -5.541283000 | -2.373576000 | 0.872618000  |
| 1  | -1.942153000 | 1.993399000  | 1.493111000  | 1  | -6.046675000 | -0.681333000 | 0.985036000  |
| 1  | -1.016029000 | 0.861534000  | 2.475710000  | 1  | 2.828844000  | 0.976440000  | -1.060997000 |
|    |              | 2_PBu3_1     |              |    | 2.618196000  | 1.660600000  | 0.536877000  |
| 6  | -0.160167000 | -0.238482000 | 2.817798000  | 1  | -0.034434000 | -1.079773000 | -1.935629000 |
| 6  | 0.422187000  | -0.003903000 | 1.613458000  | 1  | 1.721343000  | -1.172145000 | -1.718416000 |
| 6  | 1.758366000  | 0.468666000  | 1.438411000  | 1  | 0.979084000  | 2.203285000  | -1.683957000 |
| 15 | -0.645851000 | -0.228295000 | 0.176347000  | 1  | -0.567765000 | 1.367136000  | -1.915484000 |
| 8  | 2.449130000  | 0.458376000  | 0.223738000  | 1  | 1.273320000  | -2.410054000 | 0.496240000  |
| 8  | 2.027889000  | 0.061103000  | -0.880287000 | 1  | -0.421526000 | -2.451166000 | 0.046127000  |
| 8  | 3.726475000  | 0.941725000  | 0.315923000  | 1  | 2.925558000  | -0.815817000 | -1.412141000 |
| 6  | 4.490675000  | 0.935464000  | -0.882262000 | 1  | 3.464599000  | -1.186930000 | -0.215732000 |
| 6  | 5.858097000  | 1.484470000  | -0.554436000 | 1  | -1.434734000 | 2.342529000  | 0.190428000  |
| 6  | -2.331320000 | -0.527586000 | 0.749395000  | 1  | 0.102168000  | 3.135743000  | 0.497232000  |
| 6  | -0.714045000 | 1.284855000  | -0.784696000 | 1  | 4.711206000  | 0.868786000  | 1.661135000  |
| 6  | -0.239431000 | -1.680687000 | -0.811175000 | 1  | 5.360656000  | -0.718713000 | 1.294892000  |
| 6  | -1.248742000 | 2.460312000  | 0.030088000  | 1  | 5.569360000  | -0.032255000 | -1.141210000 |
| 6  | -3.372872000 | -0.455018000 | -0.366954000 | 1  | 5.056406000  | 1.596094000  | -0.694640000 |
| 6  | 0.556313000  | -2.706364000 | -0.009215000 | 1  | 6.562971000  | 0.946831000  | -0.059852000 |
| 6  | -4.743085000 | -0.898725000 | 0.130496000  | 1  | -0.157918000 | 4.452078000  | -1.613185000 |
| 6  | -5.802515000 | -0.795817000 | -0.955175000 | 1  | -1.694735000 | 3.661761000  | -1.912498000 |
| 6  | 0.833245000  | -3.962316000 | -0.823175000 | 1  | -2.052507000 | 5.903181000  | -0.848280000 |
| 6  | 1.633481000  | -4.985558000 | -0.032429000 | 1  | -2.608364000 | 4.616589000  | 0.224365000  |
| 6  | -1.218817000 | 3.753441000  | -0.774122000 | 1  | -1.063964000 | 5.410398000  | 0.527975000  |
| 6  | -1.751138000 | 4.931756000  | 0.025932000  | 1  | 0.184875000  | -3.669677000 | -2.060123000 |
| 1  | -1.186085000 | -0.549377000 | 2.936419000  | 1  | 1.872931000  | -3.636663000 | -1.584196000 |
| 1  | 0.420922000  | -0.110155000 | 3.724825000  | 1  | 1.319676000  | -4.969461000 | 0.476650000  |
| 1  | 2.300247000  | 0.768050000  | 2.327915000  | 1  | -0.374389000 | -5.007621000 | -0.009021000 |
| 1  | 4.557202000  | -0.082709000 | -1.272500000 | 1  | 0.840663000  | -5.838499000 | -0.982757000 |

|    |              |          |              |              |    |               |              |              |
|----|--------------|----------|--------------|--------------|----|---------------|--------------|--------------|
| 6  | 0.709015000  | 2_PBu3_3 | -1.258461000 | 2.052654000  | 8  | -1.575185000  | -1.091470000 | 1.235538000  |
| 6  | -0.052950000 |          | -0.607283000 | 1.133450000  | 8  | -2.016687000  | -0.359790000 | -0.854497000 |
| 6  | -1.327741000 |          | -0.032398000 | 1.409790000  | 6  | -3.255405000  | 0.175741000  | -0.383299000 |
| 15 | 0.656675000  |          | -0.531541000 | -0.529340000 | 15 | -3.075836000  | 1.534648000  | 0.255501000  |
| 6  | -2.196673000 |          | 0.398204000  | 0.407946000  | 6  | 1.799692000   | 0.169461000  | -0.024662000 |
| 8  | -1.979375000 |          | 0.368024000  | -0.820332000 | 6  | 3.030980000   | 0.773276000  | -1.163992000 |
| 8  | -3.384231000 |          | 0.893306000  | 0.867376000  | 6  | 0.560643000   | 1.427210000  | 0.193552000  |
| 6  | -4.312466000 |          | 1.325846000  | -0.118960000 | 1  | 2.605902000   | -0.079553000 | 1.547658000  |
| 6  | -5.546769000 |          | 1.814025000  | 0.599701000  | 1  | 1.891479000   | -1.996543000 | -1.051505000 |
| 6  | 2.400177000  |          | -1.001316000 | -0.434150000 | 1  | -3.704937000  | -0.526982000 | 0.318261000  |
| 6  | -0.025733000 |          | -1.732632000 | -1.685019000 | 1  | -3.890187000  | 0.243689000  | -1.266084000 |
| 6  | 0.717841000  |          | 1.101596000  | -1.290202000 | 1  | -4.048409000  | 1.947269000  | 0.528065000  |
| 6  | -0.198824000 |          | -3.129012000 | -1.079984000 | 1  | -2.469186000  | 1.457861000  | 1.157401000  |
| 6  | 3.326014000  |          | -0.012146000 | 0.269732000  | 1  | -2.594352000  | 2.226106000  | -0.438090000 |
| 6  | 0.662610000  |          | 2.259867000  | -0.297171000 | 1  | 3.504870000   | 1.669428000  | -0.763678000 |
| 6  | 4.751113000  |          | -0.545085000 | 0.345099000  | 1  | 3.787073000   | 0.002129000  | -1.314397000 |
| 6  | 5.696108000  |          | 0.449467000  | 1.000614000  | 1  | 2.558249000   | 1.001975000  | -2.118931000 |
| 6  | 1.053635000  |          | 3.573653000  | -0.959308000 | 1  | -0.118164000  | 1.143485000  | 0.996925000  |
| 6  | 0.958097000  |          | 4.746851000  | 0.003239000  | 1  | 0.002211000   | 1.558365000  | -0.732446000 |
| 6  | -1.547048000 |          | -3.303283000 | -0.392253000 | 1  | 1.059975000   | 2.359900000  | 0.458820000  |
| 6  | -1.641096000 |          | -4.636503000 | 0.331650000  | 1  | 3.053799000   | 0.851952000  | 1.894811000  |
| 1  | 1.692052000  |          | -1.652551000 | 1.849924000  | 1  | 1.865949000   | -0.426722000 | 2.269286000  |
| 1  | 0.331762000  |          | -1.382446000 | 3.062152000  | 1  | 3.380799000   | -0.838637000 | 1.438300000  |
| 1  | -1.663911000 |          | -0.011954000 | 2.439330000  | 6  | 1.072106000   | 3_PMe3_3     | -0.998327000 |
| 1  | -3.866785000 |          | 1.200010000  | -0.722217000 | 6  | -0.241690000  |              | -1.110879000 |
| 1  | -4.548167000 |          | 0.497905000  | -0.791476000 | 6  | -1.163957000  | -0.261577000 | -1.097237000 |
| 1  | -6.288558000 |          | 2.158520000  | -0.121376000 | 8  | -1.056267000  | -0.671044000 | -0.175527000 |
| 1  | -5.989549000 |          | 1.013475000  | 1.193284000  | 8  | -1.369681000  | -1.056267000 | 0.975071000  |
| 1  | -5.303099000 |          | 2.642889000  | 1.265245000  | 6  | -1.894311000  | 0.332284000  | -0.724840000 |
| 1  | 2.486921000  |          | -1.999873000 | -0.000679000 | 8  | -2.902426000  | 0.922044000  | 0.099289000  |
| 1  | 2.698940000  |          | -1.094051000 | -1.483906000 | 6  | -4.175322000  | 0.106394000  | 0.077620000  |
| 1  | -0.973805000 |          | -1.343118000 | -2.052379000 | 15 | 1.880421000   | 0.112352000  | 0.008285000  |
| 1  | 0.686855000  |          | -1.740366000 | -2.514828000 | 6  | 3.409499000   | 0.673202000  | -0.715042000 |
| 1  | 1.662861000  |          | 1.123719000  | -1.844536000 | 6  | 0.892288000   | 1.543915000  | 0.402884000  |
| 1  | -0.100463000 |          | 1.168569000  | -2.004416000 | 6  | 2.265731000   | -0.699147000 | 1.549716000  |
| 1  | -0.099865000 |          | -3.873033000 | -1.874263000 | 1  | 1.769749000   | -1.769749000 | -1.780535000 |
| 1  | 0.602699000  |          | -3.339840000 | -0.362295000 | 1  | -3.066154000  | 1.914677000  | -0.318306000 |
| 1  | 3.326962000  |          | 0.940382000  | -0.270425000 | 1  | -2.522871000  | 1.027199000  | 1.116845000  |
| 1  | 2.962228000  |          | 0.201005000  | 1.278554000  | 1  | -4.944043000  | 0.596429000  | 0.676847000  |
| 1  | -0.348091000 |          | 2.333118000  | 0.109690000  | 1  | -4.546881000  | 0.005291000  | -0.942660000 |
| 1  | 1.327375000  |          | 2.068550000  | 0.552573000  | 1  | -3.997410000  | -0.887298000 | 0.487423000  |
| 1  | 4.749063000  |          | -1.485522000 | 0.904250000  | 1  | 3.948395000   | 1.305714000  | -0.010053000 |
| 1  | 5.098556000  |          | -0.784363000 | -0.664516000 | 1  | 4.023714000   | -0.191472000 | -0.967847000 |
| 1  | 6.713494000  |          | 0.061176000  | 1.058646000  | 1  | 3.194443000   | 1.236487000  | -1.623097000 |
| 1  | 5.726022000  |          | 1.384996000  | 0.437709000  | 1  | 0.047230000   | 1.261984000  | 1.030480000  |
| 1  | 5.368290000  |          | 0.684211000  | 2.015548000  | 1  | 0.533544000   | 2.011560000  | -0.512779000 |
| 1  | 2.074070000  |          | 3.488173000  | -1.346930000 | 1  | 1.518932000   | 2.246755000  | 0.953726000  |
| 1  | 0.405666000  |          | 3.743660000  | -1.824439000 | 1  | 2.767339000   | -0.006820000 | 2.226637000  |
| 1  | 1.612539000  |          | 4.595524000  | 0.864503000  | 1  | 1.332710000   | -1.095720000 | 1.995772000  |
| 1  | 1.243716000  |          | 5.684893000  | -0.474239000 | 1  | 2.909542000   | -1.557053000 | 1.356480000  |
| 1  | -0.061394000 |          | 4.857585000  | 0.378435000  | 6  | -0.328357000  | 3_PPhMe2_1   | -1.507062000 |
| 1  | -1.705433000 |          | -2.482699000 | 0.312550000  | 6  | -1.6083351000 |              | -1.364552000 |
| 1  | -2.337421000 |          | -3.220446000 | -1.144272000 | 6  | -1.6083351000 | -1.155683000 | -1.523785000 |
| 1  | -0.885344000 |          | -4.698352000 | 1.118788000  | 6  | -2.498201000  | -0.644455000 | -0.533321000 |
| 1  | -2.618234000 |          | -4.776694000 | 0.795037000  | 8  | -3.328183000  | -1.287710000 | 0.104293000  |
| 1  | -1.473093000 |          | -5.468902000 | -0.356245000 | 8  | -2.436913000  | 0.712845000  | -0.427898000 |
| 6  | 1.133973000  | 3_PMe3_1 | -0.764767000 | -1.284748000 | 6  | -3.376666000  | 1.318593000  | 0.460540000  |
| 6  | -0.111214000 |          | -1.259990000 | -1.292494000 | 6  | -3.089455000  | 2.799260000  | 0.482424000  |
| 6  | -1.065883000 |          | -1.031912000 | -2.250047000 | 15 | 0.620782000   | -1.374272000 | 0.126965000  |
| 8  | -1.142885000 |          | -1.663024000 | 0.803577000  | 6  | -0.401280000  | -1.075834000 | 1.555452000  |
| 8  | -1.990081000 |          | -0.091429000 | -0.566597000 | 6  | 1.545898000   | -2.871531000 | 0.402494000  |
| 6  | -2.997454000 |          | 0.156649000  | 0.414633000  | 6  | 1.770057000   | -0.005640000 | 0.005150000  |
| 6  | -3.869623000 |          | 1.273747000  | -0.101247000 | 6  | 1.240467000   | 1.247066000  | -0.312554000 |
| 15 | 1.800258000  |          | 0.241815000  | 0.012620000  | 6  | 2.077274000   | 2.348908000  | -0.401529000 |
| 6  | 3.175231000  |          | 1.185082000  | -0.616070000 | 6  | 3.444516000   | 2.201310000  | -0.184059000 |
| 6  | 0.603253000  |          | 1.376189000  | 0.692342000  | 6  | 3.974080000   | 0.954171000  | 0.122630000  |
| 6  | 2.392922000  |          | -0.762859000 | 1.362317000  | 6  | 3.138761000   | -0.153005000 | 0.220003000  |
| 1  | 1.868143000  |          | -0.997136000 | -2.057915000 | 1  | 0.281755000   | -1.885678000 | -2.187621000 |
| 1  | -2.522384000 |          | 0.426766000  | 1.361319000  | 1  | -4.390154000  | 1.109846000  | 0.113188000  |
| 1  | -3.571057000 |          | -0.756286000 | 0.583128000  | 1  | -3.271206000  | 0.877076000  | 1.454404000  |
| 1  | -4.655818000 |          | 1.495546000  | 0.620610000  | 1  | -3.784735000  | 3.304205000  | 1.153218000  |
| 1  | -3.282634000 |          | 2.179202000  | -0.260470000 | 1  | -3.197172000  | -3.291740000 | -0.513633000 |
| 1  | -4.337562000 |          | 0.993935000  | -1.045297000 | 1  | -2.073939000  | 2.989219000  | 0.834245000  |
| 1  | 3.637497000  |          | 1.757416000  | 0.187729000  | 1  | 0.243249000   | -1.085100000 | 2.435131000  |
| 1  | 3.910281000  |          | 0.502301000  | -1.042997000 | 1  | -0.877790000  | -0.098378000 | 1.476318000  |
| 1  | 2.822718000  |          | 1.862840000  | -1.393537000 | 1  | -1.160987000  | -1.851555000 | 1.640103000  |
| 1  | -0.143213000 |          | 0.833815000  | 1.272244000  | 1  | 0.833346000   | -3.690314000 | 0.503884000  |
| 1  | 0.118560000  |          | 1.931380000  | -0.109428000 | 1  | 2.193380000   | -3.067728000 | -0.452255000 |
| 1  | 1.125820000  |          | 2.066865000  | 1.355544000  | 1  | 2.143819000   | -2.798211000 | 1.310355000  |
| 1  | 2.802557000  |          | -0.132792000 | 2.152382000  | 1  | 0.175419000   | 1.350407000  | -0.497925000 |
| 1  | 1.556334000  |          | -1.347108000 | 1.747435000  | 1  | 1.666678000   | 3.319463000  | -0.646800000 |
| 1  | 3.163388000  |          | -1.441181000 | 0.995996000  | 1  | 4.098083000   | 3.060785000  | -0.258613000 |
| 6  | 1.119463000  | 3_PMe3_2 | -1.349051000 | -0.629387000 | 1  | 5.037602000   | 0.286537000  | 0.286531000  |
| 6  | -0.160495000 |          | -1.726131000 | -0.545937000 | 6  | 3.559231000   | -1.121170000 | 0.460487000  |
| 6  | -1.248514000 |          | -1.023658000 | 0.050046000  | 6  | -0.308734000  | 3_PPhMe2_2   | 1.037348000  |
|    |              |          |              |              | 6  | -1.423138000  |              | -0.339056000 |
|    |              |          |              |              | 6  | -2.192772000  |              | -0.451094000 |



|    |              |              |              |    |              |               |              |
|----|--------------|--------------|--------------|----|--------------|---------------|--------------|
| 1  | 1.547464000  | -0.327547000 | -1.347633000 | 1  | -3.889579000 | 0.003323000   | 0.550421000  |
| 1  | -2.635940000 | -0.849194000 | -1.311491000 | 1  | -5.811698000 | -0.365908000  | -1.809223000 |
| 1  | -3.478650000 | -3.141437000 | -1.673849000 | 1  | -6.275266000 | 0.184883000   | -0.193467000 |
| 1  | -2.278814000 | -5.071079000 | -0.696184000 | 1  | -5.221466000 | 1.190971000   | -1.199770000 |
| 1  | -0.228216000 | -4.711591000 | 0.639532000  | 1  | -0.442183000 | 0.916696000   | 2.119877000  |
| 1  | 0.623658000  | -2.416082000 | 1.006817000  | 1  | -1.967997000 | -0.166640000  | 3.729832000  |
| 1  | -2.632605000 | 0.308827000  | 1.681838000  | 1  | -2.883283000 | -2.413846000  | 3.250234000  |
| 1  | -4.505507000 | 1.918208000  | 1.750475000  | 1  | -2.291929000 | -3.573291000  | 1.144796000  |
| 1  | -4.572603000 | 3.807519000  | 0.153170000  | 1  | -0.779371000 | -2.486641000  | -0.480330000 |
| 1  | -2.763311000 | 4.093120000  | -1.507483000 | 1  | 1.583199000  | -2.356833000  | 1.119086000  |
| 1  | -0.884176000 | 2.500267000  | -1.577246000 | 1  | 3.676953000  | -3.650186000  | 0.988965000  |
|    |              | 3_PPh3_1     |              | 1  | 5.413734000  | -3.041432000  | -0.662853000 |
| 6  | 0.014769000  | 0.117466000  | -2.125723000 | 1  | 5.058462000  | -1.121115000  | -2.184721000 |
| 6  | -1.217319000 | 0.515683000  | -2.463502000 | 1  | 2.971752000  | 0.186479000   | -2.055749000 |
| 6  | -2.236459000 | 0.893045000  | -1.528410000 | 1  | 2.695767000  | 0.860649000   | 1.412595000  |
| 8  | -2.305255000 | 1.974411000  | -0.947602000 | 1  | 3.319841000  | 3.098553000   | 2.248921000  |
| 8  | -3.229632000 | -0.020310000 | -1.426961000 | 1  | 2.123309000  | 5.103518000   | 1.429921000  |
| 6  | -4.238379000 | 0.263502000  | -0.456749000 | 1  | 0.297493000  | 4.871975000   | -0.222021000 |
| 6  | -5.238566000 | -0.864490000 | -0.492087000 | 1  | -0.343111000 | 2.628567000   | -1.053756000 |
| 15 | 0.625346000  | -0.025670000 | -0.459721000 |    |              | 3_PPh3_3      |              |
| 6  | -0.642101000 | -0.563406000 | 0.677722000  | 6  | 0.043442000  | 0.053730000   | -2.082687000 |
| 6  | 1.963434000  | -1.218354000 | -0.427467000 | 6  | 1.335027000  | 0.251133000   | -2.369234000 |
| 6  | 1.324986000  | 1.518152000  | 0.119668000  | 6  | 2.376778000  | 0.446501000   | -1.405542000 |
| 6  | -0.901975000 | 0.123076000  | 1.862524000  | 8  | 2.607082000  | 1.499624000   | -0.813663000 |
| 6  | -1.842820000 | -0.376989000 | 2.755260000  | 8  | 3.196454000  | -0.625284000  | -1.289153000 |
| 6  | -2.515633000 | -1.558375000 | 2.467011000  | 6  | 4.253843000  | -0.523293000  | -0.333758000 |
| 6  | -2.263431000 | -2.239447000 | 1.279047000  | 6  | 5.463967000  | 0.166226000   | -0.922684000 |
| 6  | -1.333351000 | -1.740873000 | 0.379780000  | 15 | -0.644616000 | -0.015897000  | -0.442301000 |
| 6  | 3.019492000  | -1.019989000 | -1.322579000 | 6  | -1.137252000 | 1.609914000   | 0.125494000  |
| 6  | 4.083475000  | -1.908635000 | -1.345188000 | 6  | -2.134313000 | -1.011454000  | -0.469535000 |
| 6  | 4.101956000  | -2.993072000 | -0.472643000 | 6  | 0.500949000  | -0.725739000  | -0.729059000 |
| 6  | 3.059293000  | -3.185773000 | 0.424521000  | 6  | -2.169367000 | 1.738927000   | 1.058322000  |
| 6  | 1.987809000  | -2.300248000 | 0.450242000  | 6  | -2.520506000 | 2.996302000   | 1.527327000  |
| 6  | 2.290582000  | 1.502315000  | 1.129937000  | 6  | -1.845691000 | 4.122692000   | 1.065796000  |
| 6  | 2.810258000  | 2.697025000  | 1.605090000  | 6  | -0.819652000 | 3.994608000   | 0.137139000  |
| 6  | 2.371717000  | 3.905477000  | 1.070902000  | 6  | -0.461462000 | 2.738487000   | -0.336844000 |
| 6  | 1.413753000  | 3.921358000  | 0.064540000  | 6  | -3.121308000 | -0.661358000  | -1.396310000 |
| 6  | 0.886092000  | 2.728250000  | -0.414749000 | 6  | -4.296893000 | -1.392911000  | -1.465501000 |
| 1  | 0.790547000  | -0.100540000 | -2.860577000 | 6  | -4.494882000 | -2.472099000  | -0.608931000 |
| 1  | -3.768107000 | 0.353867000  | 0.526892000  | 6  | -3.519345000 | -2.816583000  | 0.317873000  |
| 1  | -4.708261000 | 1.220046000  | -0.689870000 | 6  | -2.337304000 | -2.088328000  | 0.390973000  |
| 1  | -4.755933000 | -1.817423000 | -0.271191000 | 6  | 0.840095000  | -0.068071000  | 1.910105000  |
| 1  | -6.018687000 | -0.692847000 | 0.250074000  | 6  | 1.700418000  | -0.678249000  | 2.815272000  |
| 1  | -5.707152000 | -0.933942000 | -1.474233000 | 6  | 2.215297000  | -1.939863000  | -2.542696000 |
| 1  | -0.377383000 | 1.043628000  | 2.086080000  | 6  | 1.882963000  | -2.594660000  | 1.359833000  |
| 1  | -2.048467000 | 0.157030000  | 3.673419000  | 6  | 1.031606000  | -1.988070000  | 0.449293000  |
| 1  | -3.243969000 | -1.948153000 | 3.166526000  | 1  | -0.729748000 | -0.022290000  | -2.848206000 |
| 1  | -2.793748000 | -3.155145000 | 1.053033000  | 1  | 3.889596000  | 0.003367000   | 0.550345000  |
| 1  | -1.138681000 | -2.259345000 | -0.552459000 | 1  | 4.487216000  | -1.551083000  | -0.056138000 |
| 1  | 3.012371000  | -0.167351000 | -1.992948000 | 1  | 5.811811000  | -0.365310000  | -1.809302000 |
| 1  | 4.898059000  | -1.755067000 | -2.040482000 | 1  | 5.221367000  | 1.191415000   | -1.199652000 |
| 1  | 4.933441000  | -3.685648000 | -0.491140000 | 1  | 6.275254000  | 0.185317000   | -0.193440000 |
| 1  | 3.077207000  | -4.024797000 | 1.107555000  | 1  | -2.696473000 | 0.860465000   | 1.412195000  |
| 1  | 1.180037000  | -2.452111000 | 1.154708000  | 1  | -3.320950000 | 3.098325000   | 2.248223000  |
| 1  | 2.633636000  | 0.559155000  | 1.539833000  | 1  | -2.124337000 | 5.103367000   | 1.429512000  |
| 1  | 3.558239000  | 2.686477000  | 2.386898000  | 1  | -0.297939000 | 4.871902000   | -0.221805000 |
| 1  | 2.782250000  | 4.836816000  | 1.439206000  | 1  | 0.343073000  | 2.628523000   | -1.053288000 |
| 1  | 1.076347000  | 4.861757000  | -0.350684000 | 1  | -2.971978000 | 0.186885000   | -2.054819000 |
| 1  | 0.131660000  | 2.731647000  | -1.191197000 | 1  | -5.058609000 | -1.120933000  | -2.184054000 |
|    |              | 3_PPh3_2     |              | 1  | -5.413304000 | -3.042041000  | -0.663066000 |
| 6  | -0.043446000 | 0.053703000  | -2.082733000 | 1  | -3.676130000 | -3.651455000  | 0.988040000  |
| 6  | -1.335060000 | 0.251045000  | -2.369246000 | 1  | -1.582461000 | -2.357898000  | 1.118417000  |
| 6  | -2.376765000 | 0.446297000  | -1.405516000 | 1  | 0.441803000  | 0.916739000   | 2.120165000  |
| 8  | -2.607102000 | 1.499465000  | -0.813695000 | 1  | 1.967730000  | -0.166399000  | 3.730169000  |
| 8  | -3.196329000 | -0.625543000 | -1.288966000 | 1  | 2.883579000  | -2.413340000  | 3.250441000  |
| 6  | -4.253763000 | -0.523501000 | -0.333610000 | 1  | 2.292794000  | -3.572689000  | 1.144803000  |
| 6  | -5.463938000 | 0.165790000  | -0.922668000 | 1  | 0.780196000  | -2.486192000  | -0.480428000 |
| 15 | 0.644635000  | -0.015834000 | -0.442412000 |    |              | 3_TS_Pani3_1  |              |
| 6  | -0.500737000 | -0.725958000 | 0.728959000  | 6  | 0.203921000  | -0.046273000  | 2.435002000  |
| 6  | 2.134516000  | -1.011129000 | -0.469690000 | 6  | -0.951604000 | -0.174200000  | 3.098199000  |
| 6  | 1.136906000  | 1.610049000  | 0.125463000  | 6  | -2.214093000 | -0.459937000  | 2.472254000  |
| 6  | -0.840205000 | -0.068240000 | 1.909886000  | 8  | -2.856049000 | -1.4977116000 | 2.582781000  |
| 6  | -1.700466000 | -0.678530000 | 2.815024000  | 8  | -2.715147000 | 0.608151000   | 1.798012000  |
| 6  | -2.215017000 | -1.940295000 | 2.542526000  | 6  | -3.969847000 | 0.415545000   | 1.144846000  |
| 6  | -1.882376000 | -2.595137000 | 1.359779000  | 6  | -4.221292000 | 1.634009000   | 0.291720000  |
| 6  | -1.031048000 | -1.988449000 | 0.449284000  | 15 | 0.437059000  | -0.073344000  | 0.667517000  |
| 6  | 2.337847000  | -2.087538000 | 0.391340000  | 6  | 0.397482000  | 1.592342000   | 0.027052000  |
| 6  | 3.519951000  | -2.815689000 | 0.318383000  | 6  | 2.066025000  | -0.712763000  | 0.307467000  |
| 6  | 4.495259000  | -2.471573000 | -0.608803000 | 6  | -0.777370000 | -1.056169000  | -0.180065000 |
| 6  | 4.296942000  | -1.392846000 | -1.465867000 | 6  | 1.043859000  | 1.899465000   | -1.178788000 |
| 6  | 3.121284000  | -0.661397000 | -1.396822000 | 6  | 0.970526000  | 3.170694000   | -1.706459000 |
| 6  | 2.168724000  | 1.739114000  | 1.058623000  | 6  | 0.250388000  | 4.168047000   | -1.035765000 |
| 6  | 2.519631000  | 2.996485000  | 1.527775000  | 6  | -0.390767000 | 3.874994000   | 0.168061000  |
| 6  | 1.844866000  | 4.122839000  | 1.066067000  | 6  | -0.312333000 | 2.589513000   | 0.689742000  |
| 6  | 0.819151000  | 3.994711000  | 0.137072000  | 6  | 2.283597000  | -1.854067000  | -0.469183000 |
| 6  | 0.461193000  | 2.738583000  | -0.337075000 | 6  | 3.567279000  | -2.316743000  | -0.686634000 |
| 1  | 0.729639000  | -0.022311000 | -2.848344000 | 6  | 4.660751000  | -1.647896000  | -0.129657000 |
| 1  | -4.487033000 | -1.551280000 | -0.055846000 | 6  | 4.456146000  | -0.501684000  | 0.642503000  |

|    |              |              |              |    |              |              |              |             |
|----|--------------|--------------|--------------|----|--------------|--------------|--------------|-------------|
| 6  | 3.163828000  | -0.044773000 | 0.851722000  | 1  | -2.368354000 | 3.295010000  | 2.419671000  |             |
| 6  | -1.016684000 | -2.361318000 | 0.248136000  | 1  | -2.060816000 | 0.988839000  | 1.575625000  |             |
| 6  | -1.923983000 | -3.173918000 | -0.414654000 | 1  | -7.471960000 | -3.398549000 | -0.093287000 |             |
| 6  | -2.610949000 | -2.672955000 | -1.522794000 | 1  | -7.013480000 | -1.689218000 | -0.255910000 |             |
| 6  | -2.379667000 | -1.362463000 | -1.956268000 | 1  | -6.530106000 | -2.867687000 | -1.504233000 |             |
| 6  | -1.471910000 | -0.563683000 | -1.291052000 | 1  | -1.052688000 | 7.384647000  | 1.408873000  |             |
| 8  | 0.233816000  | 5.379408000  | -1.618088000 | 1  | 0.345717000  | 6.434614000  | 0.859177000  |             |
| 8  | -3.512488000 | -3.379969000 | -2.225492000 | 1  | -1.075404000 | 6.628758000  | -0.199950000 |             |
| 8  | 5.874181000  | -2.168252000 | -0.387708000 | 1  | 5.304276000  | -2.754318000 | 3.786839000  |             |
| 6  | -0.481871000 | 6.422812000  | -0.979217000 | 1  | 5.062689000  | -1.158687000 | 3.041041000  |             |
| 6  | -3.796262000 | -4.706191000 | -1.813614000 | 1  | 3.889696000  | -1.775912000 | 4.234506000  |             |
| 6  | 7.011030000  | -1.524804000 | 0.161188000  |    |              |              |              |             |
| 1  | 1.144344000  | 0.192698000  | 2.937359000  | 6  | 0.132342000  | 3_TS_Pani3_3 | 0.038499000  | 2.411373000 |
| 1  | -3.919663000 | -0.492913000 | 0.539347000  | 6  | -1.041160000 | 0.101671000  | 3.047234000  |             |
| 1  | -4.753106000 | 0.225955000  | 1.892639000  | 6  | -2.352913000 | -0.163574000 | 2.513147000  |             |
| 1  | -4.252026000 | 2.536714000  | 0.903255000  | 8  | -3.030054000 | -1.185332000 | 2.587537000  |             |
| 1  | -5.173839000 | 1.537204000  | -0.229689000 | 8  | -2.878272000 | 0.996809000  | 2.028204000  |             |
| 1  | -3.430194000 | 1.748024000  | -0.452701000 | 6  | -4.241663000 | 0.953613000  | 1.602765000  |             |
| 1  | 1.604874000  | 1.134002000  | -1.703010000 | 6  | -4.342420000 | 0.433518000  | 0.186996000  |             |
| 1  | 1.465054000  | 3.422071000  | -2.635577000 | 15 | 0.423381000  | -0.024444000 | 0.653949000  |             |
| 1  | -0.942407000 | 4.633568000  | 0.704317000  | 6  | 0.507036000  | 1.629469000  | -0.013759000 |             |
| 1  | -0.811920000 | 2.362011000  | 1.622899000  | 6  | 2.018676000  | -0.772874000 | 0.362706000  |             |
| 1  | 1.447392000  | -2.381709000 | -0.910385000 | 6  | -0.811285000 | -0.951788000 | -0.223460000 |             |
| 1  | 3.748448000  | -3.198247000 | -1.287589000 | 6  | 1.307498000  | 1.914765000  | -1.128169000 |             |
| 1  | 5.288022000  | 0.034022000  | 1.076086000  | 6  | 1.322361000  | 3.182513000  | -1.670813000 |             |
| 1  | 3.012412000  | 0.852943000  | 1.441831000  | 6  | 0.536111000  | 4.195838000  | -1.108877000 |             |
| 1  | -0.498905000 | -2.744546000 | 1.120206000  | 6  | -0.262834000 | 3.923010000  | 0.002372000  |             |
| 1  | -2.098733000 | -4.178473000 | -0.057824000 | 6  | -0.270251000 | 2.643093000  | 0.541320000  |             |
| 1  | -2.927246000 | -0.992986000 | -2.813409000 | 6  | 2.175555000  | -1.937813000 | -0.393438000 |             |
| 1  | -1.306506000 | 0.451074000  | -1.631750000 | 6  | 3.428468000  | -2.492430000 | -0.570573000 |             |
| 1  | -0.373746000 | 7.300523000  | -1.610018000 | 6  | 4.551327000  | -1.894055000 | 0.007734000  |             |
| 1  | -1.540505000 | 6.172031000  | -0.885429000 | 6  | 4.407345000  | -0.727840000 | 0.763794000  |             |
| 1  | -0.068804000 | 6.633827000  | 0.009277000  | 6  | 3.145429000  | -0.109207000 | 0.932512000  |             |
| 1  | -4.543320000 | -5.088829000 | -2.503202000 | 6  | -1.257052000 | -2.165384000 | 0.298696000  |             |
| 1  | -2.902971000 | -5.332132000 | -1.863535000 | 6  | -2.133532000 | -2.968223000 | -0.415788000 |             |
| 1  | -4.196845000 | -4.723663000 | -0.798126000 | 6  | -2.568860000 | -2.556098000 | -1.677634000 |             |
| 1  | 6.966380000  | -1.512087000 | 1.252292000  | 6  | -2.120273000 | -1.342395000 | -2.211615000 |             |
| 1  | 7.874677000  | -2.101729000 | -0.157123000 | 6  | -1.251661000 | -0.549725000 | -1.490819000 |             |
| 1  | 7.101535000  | -0.502118000 | -0.211221000 | 8  | 0.614271000  | 5.401982000  | -1.697388000 |             |
|    |              | 3_TS_Pani3_2 |              | 8  | -3.419444000 | -3.262011000 | -2.441491000 |             |
| 6  | -0.133783000 | -0.093238000 | -2.370968000 | 8  | 5.731305000  | -2.500624000 | -0.214014000 |             |
| 6  | 1.081473000  | 0.034150000  | -2.915248000 | 6  | -0.167095000 | 6.459712000  | -1.168642000 |             |
| 6  | 2.305851000  | 0.216682000  | -2.196375000 | 6  | -3.923520000 | -4.486204000 | -1.934448000 |             |
| 8  | 2.713614000  | 1.287138000  | -1.746891000 | 6  | 6.897126000  | -1.932423000 | 0.356532000  |             |
| 8  | 3.073695000  | -0.900080000 | -2.166905000 | 1  | 1.077365000  | 0.184870000  | 2.940287000  |             |
| 6  | 4.315713000  | -0.808147000 | -1.468263000 | 1  | -4.813739000 | 0.332098000  | 2.291529000  |             |
| 6  | 5.405609000  | -0.246074000 | -2.353453000 | 1  | -4.600127000 | 1.980012000  | 1.672967000  |             |
| 15 | -0.485675000 | -0.079064000 | -0.624193000 | 1  | -3.764289000 | 1.063826000  | -0.491642000 |             |
| 6  | -1.992757000 | -0.988243000 | -0.323321000 | 1  | -5.382006000 | 0.431868000  | -0.144270000 |             |
| 6  | 0.834852000  | -0.818147000 | 0.308823000  | 1  | -3.955866000 | -0.585657000 | 0.133179000  |             |
| 6  | -0.762679000 | 1.584530000  | -0.043732000 | 1  | 1.920234000  | 1.137452000  | -1.569627000 |             |
| 6  | -2.085683000 | -2.021099000 | 0.614098000  | 1  | 1.937428000  | 3.417348000  | -2.529611000 |             |
| 6  | -3.281692000 | -2.685377000 | 0.806155000  | 1  | -0.870417000 | 4.693771000  | 0.454165000  |             |
| 6  | -4.411271000 | -2.330294000 | 0.063463000  | 1  | -0.889060000 | 2.433273000  | 1.405311000  |             |
| 6  | -4.333303000 | -1.293362000 | -0.869402000 | 1  | 1.315201000  | -2.412339000 | -0.849120000 |             |
| 6  | -3.128312000 | -0.631869000 | -1.052310000 | 1  | 3.562606000  | -3.392703000 | -1.155754000 |             |
| 6  | 1.224125000  | -2.130762000 | 0.004013000  | 1  | 5.262807000  | -1.216348000 | 1.216348000  |             |
| 6  | 2.227980000  | -2.743608000 | 0.179785000  | 1  | 3.042764000  | 0.733134000  | 1.511625000  |             |
| 6  | 2.879062000  | -2.050007000 | 1.749155000  | 1  | -0.926629000 | -2.482658000 | 1.280197000  |             |
| 6  | 2.505445000  | -0.741742000 | 2.055951000  | 1  | -2.475483000 | -3.897467000 | 0.015967000  |             |
| 6  | 1.484141000  | -0.136634000 | 1.332776000  | 1  | -2.474902000 | -1.040722000 | -3.188424000 |             |
| 6  | -0.143865000 | 2.661073000  | -0.673195000 | 1  | -0.917287000 | 0.391195000  | -1.910669000 |             |
| 6  | -0.317651000 | 3.955921000  | -0.200869000 | 1  | 0.033523000  | 7.329360000  | -1.787892000 |             |
| 6  | -1.120993000 | 4.177334000  | 0.917937000  | 1  | -1.231628000 | 6.220556000  | -1.212952000 |             |
| 6  | -1.746217000 | 3.098498000  | 1.556329000  | 1  | 0.114577000  | 6.677585000  | -0.136455000 |             |
| 6  | -1.568868000 | 1.817378000  | 1.079077000  | 1  | -4.590885000 | -4.881655000 | -2.694895000 |             |
| 8  | -5.532375000 | -3.031539000 | 0.309267000  | 1  | -3.116237000 | -5.199162000 | -1.755125000 |             |
| 8  | -1.352230000 | 5.392362000  | 1.445387000  | 1  | -4.481327000 | -4.326705000 | -1.009438000 |             |
| 8  | 3.858715000  | -2.717050000 | 2.383582000  | 1  | 6.827533000  | -1.904151000 | 1.445938000  |             |
| 6  | -6.696714000 | -2.718809000 | -0.435283000 | 1  | 7.725251000  | -2.572253000 | 0.065153000  |             |
| 6  | -0.742861000 | 6.516515000  | 0.834055000  | 1  | 7.068912000  | -0.923142000 | -0.023670000 |             |
| 6  | 4.561473000  | -2.052219000 | 3.419129000  |    |              |              |              |             |
| 1  | -1.043618000 | -0.164540000 | -2.968998000 | 6  | 0.122310000  | -0.169324000 | 2.355872000  |             |
| 1  | 4.180902000  | -0.198249000 | -0.573114000 | 6  | -1.107998000 | -0.411733000 | 2.827409000  |             |
| 1  | 4.548091000  | -1.828586000 | -1.163044000 | 6  | -2.265829000 | -0.686832000 | 2.020787000  |             |
| 1  | 6.355122000  | -0.233025000 | -1.816119000 | 8  | -2.844193000 | -1.761367000 | 1.918681000  |             |
| 1  | 5.162853000  | 0.772132000  | -2.655312000 | 8  | -2.760501000 | 0.439064000  | 1.441538000  |             |
| 1  | 5.525353000  | -0.859298000 | -3.247446000 | 6  | -4.006933000 | 0.321246000  | 0.754480000  |             |
| 1  | -1.220785000 | -2.305817000 | 1.199836000  | 6  | -4.226330000 | 1.611093000  | 0.002990000  |             |
| 1  | -3.365201000 | -3.486698000 | 1.528624000  | 15 | 0.520554000  | -0.626744000 | 0.626744000  |             |
| 1  | -5.196889000 | -0.998470000 | -1.447724000 | 6  | -0.449846000 | -1.249059000 | -0.301699000 |             |
| 1  | -3.079436000 | 0.180790000  | -1.769121000 | 6  | 0.246325000  | 1.565555000  | -0.027131000 |             |
| 1  | 0.738204000  | -2.662302000 | -0.806634000 | 6  | 2.259595000  | -0.423349000 | 0.372129000  |             |
| 1  | 2.541554000  | -3.754494000 | 0.494386000  | 6  | -1.351530000 | -0.845873000 | -1.283891000 |             |
| 1  | 3.000640000  | -0.189655000 | 2.841415000  | 6  | -2.122669000 | -1.788556000 | -1.949791000 |             |
| 1  | 1.203218000  | 0.882333000  | 1.569870000  | 6  | -1.966068000 | -3.119489000 | -1.611212000 |             |
| 1  | 0.489961000  | 2.486753000  | -1.534147000 | 6  | -1.080462000 | -3.552758000 | -0.637800000 |             |
| 1  | 0.169794000  | 4.776225000  | -0.707406000 | 6  | -0.324934000 | -2.603213000 | 0.025105000  |             |

|    |              |              |              |    |              |              |              |
|----|--------------|--------------|--------------|----|--------------|--------------|--------------|
| 6  | 0.753130000  | 1.885266000  | -1.291084000 | 6  | 0.745269000  | -0.812922000 | 0.403127000  |
| 6  | 0.542912000  | 3.142533000  | -1.830152000 | 6  | -0.812318000 | 1.630493000  | 0.083321000  |
| 6  | -0.168041000 | 4.064821000  | -1.078621000 | 6  | -2.003153000 | -0.911464000 | -0.487162000 |
| 6  | -0.672359000 | 3.784741000  | 0.177073000  | 6  | 1.090850000  | -0.337780000 | 1.667661000  |
| 6  | -0.461430000 | 2.517496000  | 0.703964000  | 6  | 1.928919000  | -1.081800000 | 2.486674000  |
| 6  | 3.176370000  | 0.293192000  | 1.148759000  | 6  | 2.393317000  | -2.296014000 | 2.016968000  |
| 6  | 4.536893000  | 0.089564000  | 0.992556000  | 6  | 2.078269000  | -2.791574000 | 0.762033000  |
| 6  | 4.956683000  | -0.831894000 | 0.048076000  | 6  | 1.252269000  | -2.035196000 | -0.050738000 |
| 6  | 4.079049000  | -1.548473000 | -0.742989000 | 6  | -1.717005000 | 1.764839000  | 1.140714000  |
| 6  | 2.717255000  | -1.337679000 | -0.575536000 | 6  | -1.959477000 | 3.009618000  | 1.697675000  |
| 9  | -2.706500000 | -4.033275000 | -2.251545000 | 6  | -1.285985000 | 4.101434000  | 1.176262000  |
| 9  | 6.272155000  | -1.033009000 | -0.108106000 | 6  | -0.387274000 | 4.002539000  | 0.130408000  |
| 9  | -0.368406000 | 5.285381000  | -1.593064000 | 6  | -0.151026000 | 2.751138000  | -0.420160000 |
| 1  | 0.970948000  | 0.063412000  | 2.999751000  | 6  | -3.077770000 | -0.479075000 | -1.271625000 |
| 1  | -3.968166000 | -0.534570000 | 0.078357000  | 6  | -4.287117000 | -1.152014000 | -1.234342000 |
| 1  | -4.801278000 | 0.136542000  | 1.480921000  | 6  | -4.398233000 | -2.252225000 | -0.400494000 |
| 1  | -3.435655000 | 1.763762000  | -0.735118000 | 6  | -3.359196000 | -2.701911000 | 0.391635000  |
| 1  | -5.182886000 | 1.583254000  | -0.519048000 | 6  | -2.150541000 | -2.020471000 | 0.343953000  |
| 1  | -4.228984000 | 2.462343000  | 0.684976000  | 9  | 3.197508000  | -3.021466000 | 2.804672000  |
| 1  | -1.469288000 | 0.203815000  | -1.523048000 | 9  | -5.566713000 | -2.904700000 | -0.358430000 |
| 1  | -2.835318000 | -1.505063000 | -2.711854000 | 9  | -1.521801000 | 5.308589000  | 1.707663000  |
| 1  | -1.006913000 | -4.605742000 | -0.404262000 | 1  | -0.842060000 | -0.030891000 | -2.975784000 |
| 1  | 0.357928000  | -2.910293000 | 0.809007000  | 1  | 5.263938000  | -0.853543000 | -1.869960000 |
| 1  | 1.312631000  | 1.147960000  | -1.856344000 | 1  | 4.924094000  | 0.884826000  | -1.842888000 |
| 1  | 0.920501000  | 3.416814000  | -2.805426000 | 1  | 4.399983000  | -1.086629000 | 0.440242000  |
| 1  | -1.214394000 | 4.544391000  | 0.723309000  | 1  | 5.663679000  | 0.748034000  | 0.402092000  |
| 1  | -0.851377000 | 2.266476000  | 1.681351000  | 1  | 3.962143000  | 0.633627000  | 0.466159000  |
| 1  | 2.828213000  | 1.020739000  | 1.872941000  | 1  | 0.708129000  | 0.611778000  | 2.019416000  |
| 1  | 5.265127000  | 0.629114000  | 1.582074000  | 1  | 2.218350000  | -0.735359000 | 3.469063000  |
| 1  | 4.459073000  | -2.252047000 | -1.470769000 | 1  | 2.482871000  | -3.740635000 | 0.438622000  |
| 1  | 2.017289000  | -1.887522000 | -1.191067000 | 1  | 0.992622000  | -2.394415000 | -2.039363000 |
|    |              | 3_Ppfp3_2    |              | 1  | -2.236386000 | 0.896989000  | 1.529248000  |
| 6  | -0.000882000 | 0.078189000  | -2.292972000 | 1  | -2.656042000 | 3.143247000  | 2.513728000  |
| 6  | 1.201537000  | 0.485963000  | -2.715356000 | 1  | 0.108967000  | 4.888394000  | -0.241266000 |
| 6  | 2.268718000  | 0.910513000  | -1.857614000 | 1  | 0.556533000  | 2.644370000  | -1.233234000 |
| 8  | 2.346325000  | 2.009174000  | -1.310720000 | 1  | -2.972249000 | 0.391463000  | -1.908729000 |
| 8  | 3.288586000  | 0.024122000  | -1.796149000 | 1  | -5.132313000 | -0.839030000 | -1.831577000 |
| 6  | 4.360001000  | 0.367859000  | -0.915958000 | 1  | -3.499807000 | -3.564271000 | 1.028443000  |
| 6  | 5.377013000  | -0.743879000 | -0.975054000 | 1  | -1.327519000 | -2.356372000 | 0.960495000  |
| 15 | -0.501923000 | -0.023757000 | -0.589116000 |    |              | 3_Pcy3_1     |              |
| 6  | 0.850256000  | 0.488190000  | 0.477426000  | 6  | -0.158760000 | 0.355089000  | -1.957260000 |
| 6  | -1.202957000 | 1.522612000  | -0.025591000 | 6  | -1.397399000 | 0.046759000  | -2.351400000 |
| 6  | -1.795938000 | -1.251160000 | -0.421930000 | 6  | -2.445542000 | -0.563546000 | -1.606243000 |
| 6  | 1.176254000  | 0.247867000  | 1.615762000  | 8  | -2.728090000 | -1.760816000 | -1.604976000 |
| 6  | 2.191360000  | -0.183973000 | 2.457977000  | 8  | -3.227359000 | 0.342942000  | -0.950481000 |
| 6  | 2.855615000  | -1.353233000 | 2.136230000  | 8  | -4.375234000 | -0.217096000 | -0.217338000 |
| 6  | 2.560606000  | -2.104145000 | 1.010114000  | 6  | -5.534801000 | -0.374993000 | -1.222108000 |
| 6  | 1.552842000  | -1.658020000 | 0.172451000  | 15 | 0.567845000  | 0.213569000  | -0.336782000 |
| 6  | -2.120880000 | 1.527584000  | 1.028769000  | 6  | 0.575228000  | 1.845432000  | 0.460174000  |
| 6  | -2.646549000 | 2.722931000  | 1.490146000  | 6  | -0.376521000 | -0.899644000 | 0.730090000  |
| 6  | -2.239876000 | 3.895817000  | 0.876104000  | 6  | 2.292949000  | -0.266895000 | -0.603689000 |
| 6  | -1.336366000 | 3.924845000  | -0.169896000 | 6  | 1.425750000  | 2.864938000  | -0.302234000 |
| 6  | -0.814124000 | 2.721905000  | -0.622623000 | 6  | 1.380655000  | 4.222007000  | 0.393417000  |
| 6  | -2.913166000 | -1.134862000 | -1.256119000 | 6  | -0.049713000 | 4.720547000  | 0.544641000  |
| 6  | -3.947492000 | -2.051494000 | -1.174339000 | 6  | -0.886096000 | 3.704633000  | 1.310562000  |
| 6  | -3.844950000 | -3.073900000 | -0.246089000 | 6  | -0.863785000 | 2.352506000  | 0.607637000  |
| 6  | -2.760580000 | -3.213533000 | 0.598597000  | 6  | -0.196888000 | -2.370113000 | 0.344935000  |
| 6  | -1.728575000 | -2.289543000 | 0.505481000  | 6  | -1.189816000 | -3.227592000 | 1.119191000  |
| 9  | 3.835056000  | -1.777148000 | 2.945721000  | 6  | -0.997849000 | -3.048071000 | -2.619782000 |
| 9  | -4.843713000 | -3.963162000 | -0.162185000 | 6  | -1.125571000 | -1.580603000 | 3.007902000  |
| 9  | -2.751195000 | 5.054183000  | 1.313911000  | 6  | -0.138957000 | -0.711550000 | 2.232637000  |
| 1  | -0.816882000 | -0.170525000 | -2.972430000 | 6  | 3.100275000  | -0.435210000 | 0.683295000  |
| 1  | 4.792249000  | 1.320525000  | -1.225218000 | 6  | 4.580086000  | -0.592212000 | 0.347456000  |
| 1  | 3.961652000  | 0.496342000  | 0.094571000  | 6  | 4.800634000  | -1.765089000 | -0.600405000 |
| 1  | 5.772395000  | -0.851750000 | -1.985456000 | 6  | 3.970998000  | -1.603823000 | -1.868887000 |
| 1  | 6.206460000  | -0.524342000 | -0.302366000 | 6  | 2.489202000  | -1.470206000 | -1.531674000 |
| 1  | 4.931864000  | -1.693402000 | -0.675019000 | 1  | 0.566336000  | 0.795263000  | -2.648647000 |
| 1  | 0.644715000  | 1.162336000  | 1.846367000  | 1  | -4.111052000 | -1.103805000 | 0.229418000  |
| 1  | 2.469083000  | 0.369816000  | 3.344016000  | 1  | -4.616186000 | 0.576336000  | 0.482546000  |
| 1  | 3.116545000  | -3.007898000 | 0.802090000  | 1  | -5.281207000 | -1.116983000 | -1.978231000 |
| 1  | 1.308635000  | -2.218001000 | -0.723011000 | 1  | -6.411340000 | -0.723028000 | -0.673657000 |
| 1  | -2.427966000 | 0.595858000  | 1.489121000  | 1  | -5.790059000 | 0.561544000  | -1.719320000 |
| 1  | -3.359486000 | 2.757504000  | 2.302355000  | 1  | 1.011736000  | 1.706074000  | 1.457007000  |
| 1  | -1.056044000 | 4.869150000  | -0.615724000 | 1  | -1.419872000 | -0.620053000 | 0.532813000  |
| 1  | -0.097492000 | 2.713376000  | -1.433881000 | 1  | 2.686946000  | 0.605850000  | -1.145146000 |
| 1  | -2.982320000 | -0.321076000 | -1.968703000 | 1  | 2.461488000  | 2.527212000  | -0.373267000 |
| 1  | -4.819746000 | -1.983933000 | -1.809617000 | 1  | 1.037623000  | 2.962385000  | -1.322869000 |
| 1  | -2.731525000 | -4.027027000 | 1.310345000  | 1  | 1.832612000  | 4.123844000  | 1.387053000  |
| 1  | -0.875109000 | -2.382747000 | 1.164125000  | 1  | 1.984141000  | 4.940072000  | -0.164796000 |
|    |              | 3_Ppfp3_3    |              | 1  | -0.064243000 | 5.688550000  | 1.049090000  |
| 6  | 0.011784000  | 0.099366000  | -2.309548000 | 1  | -0.487083000 | 4.866165000  | -0.449328000 |
| 6  | 1.246311000  | 0.347423000  | -2.753140000 | 1  | -0.481260000 | 3.592020000  | 2.322984000  |
| 6  | 2.431968000  | 0.641878000  | -2.015933000 | 1  | -1.916574000 | 4.049952000  | 1.411338000  |
| 8  | 2.735091000  | 1.763937000  | -1.606445000 | 1  | -1.480064000 | 1.629590000  | 1.148112000  |
| 8  | 3.307765000  | -0.389836000 | -1.950722000 | 1  | -1.301429000 | 2.451873000  | -0.391528000 |
| 6  | 4.614214000  | -0.084757000 | -1.453520000 | 1  | -0.324402000 | -2.502856000 | -0.731299000 |
| 6  | 4.658267000  | -0.099243000 | 0.057488000  | 1  | 0.821633000  | -2.675363000 | 0.610223000  |
| 15 | -0.474186000 | 0.012536000  | -0.601346000 | 1  | -2.203987000 | -2.925348000 | 0.835081000  |

|    |              |               |              |    |              |              |              |
|----|--------------|---------------|--------------|----|--------------|--------------|--------------|
| 1  | -1.074106000 | -4.2726058000 | 0.838319000  | 8  | 3.399576000  | -0.404237000 | -1.367529000 |
| 1  | -1.720059000 | -3.651048000  | 3.173519000  | 6  | 4.708966000  | -0.378251000 | -0.799236000 |
| 1  | 0.000512000  | -3.405054000  | 2.898336000  | 6  | 5.673456000  | 0.377294000  | -1.686259000 |
| 1  | -2.142784000 | -1.236696000  | 2.783665000  | 15 | -0.544672000 | -0.003081000 | -0.267639000 |
| 1  | -0.970196000 | -1.449517000  | 4.080409000  | 6  | -1.947983000 | -1.145742000 | -0.506059000 |
| 1  | 0.885388000  | -1.004165000  | 2.483575000  | 6  | 0.667807000  | -0.806774000 | 0.797912000  |
| 1  | -0.262382000 | 0.332208000   | 2.524975000  | 6  | -1.140343000 | 1.504920000  | 0.542807000  |
| 1  | 2.947433000  | 0.412064000   | 1.357473000  | 6  | -3.081281000 | -0.942294000 | 0.507116000  |
| 1  | 2.749189000  | -1.334532000  | 1.201924000  | 6  | -4.137417000 | -2.028634000 | 0.337990000  |
| 1  | 4.932985000  | 0.329079000   | -0.129829000 | 6  | -4.693447000 | -2.020365000 | -1.079624000 |
| 1  | 5.158748000  | -0.723547000  | 1.263581000  | 6  | -3.571439000 | -2.214396000 | -2.090500000 |
| 1  | 5.860007000  | -1.860076000  | -0.846163000 | 6  | -2.493909000 | -1.146637000 | -1.938195000 |
| 1  | 4.502756000  | -2.691633000  | -0.096232000 | 6  | 0.133999000  | -1.064133000 | 2.209774000  |
| 1  | 4.298881000  | -0.705990000  | -2.404773000 | 6  | 1.259937000  | -1.598354000 | 3.089691000  |
| 1  | 4.123871000  | -2.452740000  | -2.537614000 | 6  | 1.858991000  | -2.869543000 | 2.499423000  |
| 1  | 2.158110000  | -2.383088000  | -1.032121000 | 6  | 2.336843000  | -2.634144000 | 1.071206000  |
| 1  | 1.890736000  | -1.358441000  | -2.437870000 | 6  | 1.198403000  | -2.113699000 | 0.200793000  |
|    |              | 3_Pcy3_2      |              | 6  | 0.017650000  | 2.358713000  | 1.063550000  |
| 6  | 0.188024000  | 0.433096000   | -1.884963000 | 6  | -0.521984000 | 3.612338000  | 1.745453000  |
| 6  | 1.487001000  | 0.589668000   | -2.148799000 | 6  | -1.404948000 | 4.420138000  | 0.802967000  |
| 6  | 2.613583000  | 0.572730000   | -1.283526000 | 6  | -2.545789000 | 3.563139000  | 0.269551000  |
| 8  | 3.094345000  | 1.547306000   | -0.702711000 | 6  | -1.996399000 | 2.325314000  | -0.429593000 |
| 8  | 3.237861000  | -0.639981000  | -1.249474000 | 1  | -0.547450000 | 0.624935000  | -2.595841000 |
| 6  | 4.534092000  | -0.675714000  | -0.650764000 | 1  | 4.666707000  | 0.062795000  | 0.197481000  |
| 6  | 5.590292000  | -0.154435000  | -1.599819000 | 1  | 5.000638000  | -1.424204000 | -0.706672000 |
| 15 | -0.595893000 | 0.144424000   | -0.311675000 | 1  | 6.676770000  | 0.3581821000 | -1.258444000 |
| 6  | -1.153047000 | 1.722937000   | 0.389919000  | 1  | 5.711152000  | -0.071615000 | -2.679519000 |
| 6  | -2.069681000 | -0.842514000  | -0.676331000 | 1  | 5.364640000  | 1.418007000  | -1.782252000 |
| 6  | 0.548721000  | -0.601131000  | 0.873779000  | 1  | -1.514094000 | -2.137311000 | -0.323006000 |
| 6  | 0.055679000  | 2.641005000   | 0.602975000  | 1  | 1.500634000  | -0.094252000 | 0.864756000  |
| 6  | -0.379092000 | 3.964292000   | 1.221049000  | 1  | -1.759762000 | 1.189969000  | 1.391281000  |
| 6  | -1.409321000 | 4.654492000   | 0.337719000  | 1  | -2.694176000 | -0.941181000 | 1.528138000  |
| 6  | -2.612863000 | 3.747722000   | 0.120791000  | 1  | -3.548868000 | 0.033250000  | 0.337906000  |
| 6  | -2.200195000 | 2.411707000   | -0.489334000 | 1  | -3.684551000 | -3.005192000 | 0.543217000  |
| 6  | -1.816843000 | -2.089558000  | -1.530390000 | 1  | -4.935878000 | -1.883068000 | 1.067906000  |
| 6  | -3.155653000 | -2.665260000  | -1.981546000 | 1  | -5.452102000 | -2.796231000 | -1.198131000 |
| 6  | -4.026180000 | -3.009418000  | -0.778612000 | 1  | -5.183872000 | -1.057932000 | -1.265577000 |
| 6  | -4.247080000 | -1.785615000  | 0.102538000  | 1  | -3.115587000 | -3.198646000 | -1.933888000 |
| 6  | -2.916707000 | -1.186706000  | 0.548782000  | 1  | -3.961456000 | -2.199631000 | -3.109822000 |
| 6  | 0.137143000  | -0.456743000  | 2.343334000  | 1  | -1.686379000 | -1.328094000 | -2.648925000 |
| 6  | 1.257440000  | -0.982331000  | 3.236736000  | 1  | -2.915268000 | -0.161686000 | -2.169079000 |
| 6  | 1.596751000  | -2.430790000  | 2.909725000  | 1  | -0.293559000 | -0.157235000 | 2.644256000  |
| 6  | 1.971965000  | -2.574446000  | 1.440278000  | 1  | -0.666753000 | -1.810935000 | 2.152003000  |
| 6  | 0.845053000  | -2.067365000  | 0.549232000  | 1  | 2.039360000  | -0.831737000 | 1.643633000  |
| 1  | -0.567849000 | 0.512007000   | -2.671808000 | 1  | 0.888855000  | -1.781671000 | 4.099726000  |
| 1  | 4.523895000  | -0.103044000  | 0.278065000  | 1  | 2.680198000  | 3.226721000  | -3.123743000 |
| 1  | 4.708902000  | -1.724469000  | -0.412603000 | 1  | 1.094071000  | -3.654541000 | 2.493636000  |
| 1  | 6.577409000  | -0.231149000  | -1.141610000 | 1  | 3.143653000  | -1.892487000 | 1.074604000  |
| 1  | 5.593302000  | -0.734999000  | -2.523087000 | 1  | 2.743294000  | -3.552344000 | 0.644881000  |
| 1  | 5.401697000  | 0.891008000   | -1.842207000 | 1  | 0.394638000  | -2.857883000 | 0.191851000  |
| 1  | -1.608526000 | 1.494609000   | 1.361495000  | 1  | 1.530234000  | -1.964305000 | -0.826458000 |
| 1  | -2.647212000 | -0.151415000  | -1.308151000 | 1  | 0.636654000  | 1.791190000  | 1.762522000  |
| 1  | 1.474468000  | -0.025889000  | 0.735688000  | 1  | 0.661641000  | 2.634944000  | 0.221636000  |
| 1  | 0.811277000  | 2.155985000   | 1.225523000  | 1  | -1.110035000 | 3.315285000  | 2.621594000  |
| 1  | 0.526973000  | 2.828172000   | -0.367635000 | 1  | 0.309659000  | 4.219602000  | 2.107384000  |
| 1  | -0.816362000 | 3.776614000   | 2.208603000  | 1  | -1.794698000 | 5.304584000  | 1.310681000  |
| 1  | 0.492854000  | 4.603531000   | 1.370031000  | 1  | -0.800273000 | 4.770923000  | -0.040595000 |
| 1  | -1.721923000 | 5.602418000   | 0.779882000  | 1  | -3.188202000 | 3.252197000  | 1.101368000  |
| 1  | -0.951818000 | 4.883690000   | -0.631088000 | 1  | -3.166683000 | -4.135231000 | -0.422279000 |
| 1  | -3.098014000 | 3.559999000   | 1.085486000  | 1  | -1.362792000 | 2.638991000  | -1.266290000 |
| 1  | -3.351365000 | 4.230996000   | -0.521508000 | 1  | -2.806718000 | 1.721748000  | -0.846237000 |
| 1  | -3.081460000 | 1.777765000   | -0.607406000 |    |              | 3_PBu3_1     |              |
| 1  | -1.774287000 | 2.578410000   | -1.485891000 | 6  | -0.382995000 | -0.564310000 | -1.818879000 |
| 1  | -1.186439000 | -1.848217000  | -2.388410000 | 6  | -1.690663000 | -0.320454000 | -1.977606000 |
| 1  | -1.291631000 | -2.843806000  | -0.941068000 | 6  | -2.520497000 | 0.314247000  | -0.997425000 |
| 1  | -3.672474000 | -1.926372000  | -2.604145000 | 8  | -2.947877000 | 1.463938000  | -1.039899000 |
| 1  | -2.989580000 | -3.549156000  | -2.599933000 | 8  | -2.903196000 | -0.533609000 | -0.002899000 |
| 1  | -4.983902000 | -3.419406000  | -1.104688000 | 6  | -3.832098000 | -0.017285000 | 0.951511000  |
| 1  | -3.526774000 | -3.787338000  | -0.189690000 | 6  | -4.088609000 | -1.106233000 | 1.963310000  |
| 1  | -4.801053000 | -1.028176000  | -0.463691000 | 15 | 0.559405000  | -0.199152000 | -0.356296000 |
| 1  | -4.851463000 | -2.043189000  | 0.974183000  | 6  | 0.339696000  | -1.368867000 | 0.999299000  |
| 1  | -2.374028000 | -1.919864000  | 1.156424000  | 6  | 2.294538000  | -0.200143000 | -0.809765000 |
| 1  | -3.083222000 | -0.303709000  | 1.171894000  | 6  | 0.126156000  | 1.392023000  | 0.347227000  |
| 1  | -0.072768000 | 0.584054000   | 2.593808000  | 6  | 1.043659000  | -2.714657000 | 0.829958000  |
| 1  | -0.777605000 | -1.029502000  | 2.526465000  | 6  | 0.583757000  | -0.522924000 | -0.379141000 |
| 1  | 2.147316000  | -0.361390000  | 3.080724000  | 6  | -0.904660000 | -3.839868000 | -0.351712000 |
| 1  | 0.972114000  | -0.879714000  | 4.285319000  | 6  | 0.288856000  | 2.5597131000 | -0.623613000 |
| 1  | 2.408190000  | -2.784048000  | 3.548816000  | 6  | 0.128041000  | 3.907596000  | 0.069442000  |
| 1  | 0.724026000  | -3.060048000  | 3.119324000  | 6  | -1.239828000 | 4.089730000  | 0.712676000  |
| 1  | 2.874299000  | -1.987384000  | 1.2326677000 | 6  | 2.3232747000 | 0.232556000  | 0.311942000  |
| 1  | 2.199153000  | -3.614470000  | 1.198785000  | 6  | 4.695091000  | 0.052708000  | -0.072976000 |
| 1  | -0.056429000 | -2.656665000  | 0.750554000  | 6  | 5.634537000  | 0.510362000  | 1.031354000  |
| 1  | 1.096557000  | -2.184534000  | -0.507168000 | 1  | 0.217841000  | -1.057981000 | -2.585185000 |
|    |              | 3_Pcy3_3      |              | 1  | -3.408716000 | 0.874749000  | 1.420717000  |
| 6  | 0.200804000  | 0.464983000   | -1.818955000 | 1  | -4.748435000 | 0.282541000  | 0.440009000  |
| 6  | 1.489872000  | 0.736500000   | -2.035437000 | 1  | -4.792168000 | -0.756781000 | 2.719063000  |
| 6  | 2.636752000  | 0.714819000   | -1.202060000 | 1  | -4.509553000 | -1.988889000 | 1.481150000  |
| 8  | 3.028574000  | 1.644173000   | -0.491377000 | 1  | -3.161998000 | -1.393708000 | 2.463279000  |

|    |              |              |              |    |              |              |              |
|----|--------------|--------------|--------------|----|--------------|--------------|--------------|
| 1  | 0.711759000  | -0.857943000 | 1.892451000  | 6  | 5.385817000  | 0.236104000  | -0.274614000 |
| 1  | -0.739947000 | -1.486361000 | 1.125870000  | 15 | -0.703329000 | 0.232812000  | 0.226816000  |
| 1  | 2.521056000  | -1.219948000 | -1.140710000 | 6  | -0.870155000 | 1.335983000  | -1.188347000 |
| 1  | 2.399930000  | 0.445589000  | -1.686138000 | 6  | 0.021772000  | -1.271889000 | -0.427839000 |
| 1  | -0.899289000 | 1.314166000  | 0.719784000  | 6  | -2.340518000 | -0.135210000 | 0.859139000  |
| 1  | 0.770112000  | 1.517395000  | 1.224722000  | 6  | -1.863974000 | 2.483798000  | -1.006692000 |
| 1  | 2.123560000  | -2.549379000 | 0.777352000  | 6  | -1.522349000 | 3.446861000  | 0.126015000  |
| 1  | 0.862575000  | -3.297687000 | 1.737035000  | 6  | -0.183979000 | 4.143971000  | -0.069472000 |
| 1  | 0.831459000  | -2.986448000 | -1.301448000 | 6  | -3.238932000 | -0.858162000 | -0.139112000 |
| 1  | 1.156214000  | -4.452870000 | -0.406904000 | 6  | -4.658795000 | -1.014896000 | 0.388505000  |
| 1  | -1.173115000 | -4.343323000 | 0.580931000  | 6  | -5.552017000 | -1.757538000 | -0.592390000 |
| 1  | -1.511828000 | -2.935852000 | -0.432389000 | 6  | 0.166807000  | -2.369885000 | 0.621656000  |
| 1  | -1.182929000 | -4.494631000 | -1.178167000 | 6  | 0.648717000  | -3.687310000 | 0.020995000  |
| 1  | 1.277355000  | 2.505044000  | -1.090446000 | 6  | 2.068265000  | -3.608484000 | -0.520633000 |
| 1  | -0.453069000 | 2.458652000  | -1.420166000 | 1  | -0.320107000 | 1.197276000  | 2.417225000  |
| 1  | 0.912201000  | 4.017793000  | 0.825297000  | 1  | 4.362747000  | -1.653582000 | -0.435082000 |
| 1  | 0.291793000  | 4.696505000  | -0.667933000 | 1  | 3.720103000  | -0.391261000 | -1.499509000 |
| 1  | -2.034088000 | 3.910863000  | -0.014715000 | 1  | 5.797092000  | 0.028310000  | 0.713876000  |
| 1  | -1.391304000 | 3.394781000  | 1.541626000  | 1  | 6.143819000  | -0.008342000 | -1.020234000 |
| 1  | -1.356896000 | 5.099527000  | 1.107982000  | 1  | 5.160064000  | 1.345937000  | -0.345993000 |
| 1  | 3.048617000  | 1.283316000  | 0.558854000  | 1  | 0.139648000  | 1.696744000  | -1.402630000 |
| 1  | 3.023699000  | -0.344734000 | 1.219509000  | 1  | -1.171408000 | 0.703743000  | -2.028860000 |
| 1  | 4.873316000  | -4.001292000 | -0.305535000 | 1  | -0.626376000 | -1.596166000 | -1.248878000 |
| 1  | 4.893437000  | 0.612233000  | -0.991581000 | 1  | 0.983142000  | -0.999537000 | -0.872569000 |
| 1  | 5.483150000  | 1.568388000  | 1.255857000  | 1  | -2.210917000 | -0.723151000 | 1.772153000  |
| 1  | 5.456596000  | -0.052479000 | 1.950350000  | 1  | -2.778253000 | 0.822212000  | 1.161596000  |
| 1  | 6.679806000  | 0.373743000  | 0.752686000  | 1  | -1.901180000 | 3.040429000  | -1.947054000 |
|    |              | 3_PBu3_2     |              | 1  | -2.864273000 | 2.069170000  | -0.851894000 |
| 6  | 0.328366000  | -0.221039000 | 1.598155000  | 1  | -2.317972000 | 4.192397000  | 0.194248000  |
| 6  | 1.659371000  | -0.111572000 | 1.658513000  | 1  | -1.524062000 | 2.911575000  | 1.081667000  |
| 6  | 2.571470000  | 0.192422000  | 0.606884000  | 1  | -0.000258000 | 4.871853000  | 0.721730000  |
| 8  | 2.932386000  | 1.320546000  | 0.267342000  | 1  | 0.646742000  | 3.435310000  | -0.063228000 |
| 8  | 3.147615000  | -0.919628000 | 0.067301000  | 1  | -0.164399000 | 4.674496000  | -1.025018000 |
| 6  | 4.266859000  | -0.709958000 | -0.796843000 | 1  | -3.262868000 | -0.310058000 | -1.087642000 |
| 6  | 5.532330000  | -0.478971000 | -0.002127000 | 1  | -2.821158000 | -1.846312000 | -0.357839000 |
| 15 | -0.609230000 | -0.010775000 | -0.105128000 | 1  | -4.626792000 | -1.545692000 | -1.344328000 |
| 6  | -0.122947000 | -1.138809000 | -1.208545000 | 1  | -5.071345000 | -0.023301000 | 0.596392000  |
| 6  | -2.347562000 | -0.252442000 | 0.464619000  | 1  | -6.567663000 | -1.824033000 | -0.210219000 |
| 6  | -0.375039000 | 1.638064000  | -0.561003000 | 1  | -5.606561000 | -1.227198000 | -1.545649000 |
| 6  | -0.651676000 | -2.564983000 | -1.065769000 | 1  | -5.162295000 | -2.758214000 | -0.791243000 |
| 6  | -0.199922000 | -3.279203000 | 0.201436000  | 1  | 0.867626000  | -2.037402000 | -1.393241000 |
| 6  | -0.604591000 | -4.744784000 | 0.187971000  | 1  | -0.798706000 | -2.527798000 | 1.111735000  |
| 6  | -0.794016000 | 2.737837000  | 0.410422000  | 1  | 0.598386000  | -4.460517000 | 0.790740000  |
| 6  | -0.638338000 | 4.133185000  | -0.187854000 | 1  | -0.039957000 | -3.990978000 | -0.773556000 |
| 6  | 0.805170000  | 4.479861000  | -0.523676000 | 1  | 2.397055000  | -4.573093000 | -0.909410000 |
| 6  | -3.254324000 | 0.063810000  | -0.723471000 | 1  | 2.153589000  | -2.880723000 | -1.330570000 |
| 6  | -4.694585000 | -0.379767000 | -0.486212000 | 1  | 2.759877000  | -3.307467000 | 0.269240000  |
| 6  | -5.329193000 | 0.295121000  | 0.721114000  |    |              |              |              |
| 1  | -0.289797000 | -0.421220000 | 2.474832000  |    |              |              |              |
| 1  | 4.339117000  | -1.618153000 | -1.393864000 |    |              |              |              |
| 1  | 4.062454000  | 0.130571000  | -1.460179000 |    |              |              |              |
| 1  | 5.728937000  | -1.323811000 | 0.658846000  |    |              |              |              |
| 1  | 6.382526000  | -0.363204000 | -0.675883000 |    |              |              |              |
| 1  | 5.443111000  | 0.425160000  | 0.599793000  | 15 | -2.279081000 | 1_TS_PMe3_1  | -0.062984000 |
| 1  | -0.465777000 | -0.689303000 | -2.144624000 | 6  | -2.559284000 | 0.390179000  | -1.696762000 |
| 1  | 0.970984000  | -1.128304000 | -1.225712000 | 6  | -3.906815000 | -0.642408000 | -0.578199000 |
| 1  | -2.464387000 | -1.293429000 | 0.785696000  | 6  | -1.309842000 | -1.575923000 | 0.100152000  |
| 1  | -2.580118000 | 0.374197000  | 1.329658000  | 1  | -2.959245000 | -0.451267000 | 2.265442000  |
| 1  | 0.687760000  | 1.708250000  | -0.808051000 | 1  | -1.613238000 | 0.700411000  | 2.144670000  |
| 1  | -0.940531000 | 1.697031000  | -1.496742000 | 1  | -3.827783000 | -1.047417000 | -1.587292000 |
| 1  | -1.746392000 | -2.559025000 | -1.110620000 | 1  | -4.607246000 | 0.192975000  | -0.595223000 |
| 1  | -0.312730000 | -3.134600000 | -1.935351000 | 1  | -1.798523000 | -2.280963000 | 0.775816000  |
| 1  | 0.885538000  | -3.181906000 | 0.303372000  | 1  | -1.198849000 | -2.033989000 | -0.882354000 |
| 1  | -0.630183000 | -2.787595000 | 1.079733000  | 1  | -4.291867000 | -1.417248000 | 0.089138000  |
| 1  | -0.149147000 | -5.264414000 | -0.657848000 | 1  | -0.319909000 | -1.342324000 | 0.495016000  |
| 1  | -0.297500000 | -5.255574000 | 1.100910000  | 1  | -3.261160000 | 1.223575000  | 1.750572000  |
| 1  | -1.688392000 | -4.847188000 | 0.094733000  | 6  | -0.787793000 | 1.576478000  | -0.628965000 |
| 1  | -1.836277000 | 2.583479000  | 0.706995000  | 6  | 0.379238000  | 1.334278000  | 0.083615000  |
| 1  | -0.186728000 | 2.661418000  | 1.317930000  | 6  | 1.373210000  | 0.472812000  | -0.477902000 |
| 1  | -1.259295000 | 4.210186000  | -1.085775000 | 8  | 1.306977000  | -0.107352000 | -1.559868000 |
| 1  | -1.030240000 | 4.860928000  | 0.526179000  | 8  | 2.465834000  | 0.332481000  | 0.316988000  |
| 1  | 1.199783000  | 3.846060000  | -1.319701000 | 6  | 3.508312000  | -0.498886000 | -0.187490000 |
| 1  | 0.894689000  | 5.515208000  | -0.854700000 | 6  | 4.619614000  | -0.509959000 | 0.832739000  |
| 1  | 1.446429000  | 4.347479000  | 0.350927000  | 1  | -1.439927000 | 2.386311000  | -0.325009000 |
| 1  | -3.231831000 | 1.141888000  | -0.913591000 | 1  | -0.785587000 | 1.374797000  | -1.692484000 |
| 1  | -2.866031000 | -0.424595000 | -1.622659000 | 1  | 3.117773000  | -1.503432000 | -0.362960000 |
| 1  | -5.280141000 | -0.158671000 | -1.381116000 | 1  | 3.851695000  | -0.108012000 | -1.147294000 |
| 1  | -4.714807000 | -1.466265000 | -0.357252000 | 1  | 5.439259000  | -1.138304000 | 0.483603000  |
| 1  | -5.254202000 | 1.382653000  | 0.639704000  | 1  | 5.004041000  | 0.497276000  | 0.996139000  |
| 1  | -6.385236000 | 0.038096000  | 0.808089000  | 1  | 4.265862000  | -0.904481000 | 1.785811000  |
| 1  | -4.841393000 | -0.003691000 | 1.650520000  | 1  | 0.528587000  | 1.716396000  | 1.084381000  |
|    |              | 3_PBu3_3     |              |    |              | 1_TS_PMe3_2  |              |
| 6  | 0.273381000  | 0.903455000  | 1.549976000  | 15 | 2.079499000  | 0.097371000  | -0.103422000 |
| 6  | 1.598373000  | 1.083478000  | 1.482246000  | 6  | 2.581402000  | -0.214489000 | -1.599751000 |
| 6  | 2.417117000  | 0.795605000  | 0.345343000  | 6  | 3.554314000  | 0.844635000  | -0.849921000 |
| 8  | 2.561964000  | 1.524038000  | -0.637508000 | 6  | 0.938494000  | 1.483332000  | 0.059782000  |
| 8  | 3.151701000  | -0.339495000 | 0.488132000  | 1  | 2.917418000  | 0.702765000  | 2.086822000  |
| 6  | 4.141683000  | -0.512830000 | -0.512830000 | 1  | 1.731493000  | -0.617373000 | 2.154303000  |

### Transition States (TS)



|    |              |               |              |    |              |               |              |
|----|--------------|---------------|--------------|----|--------------|---------------|--------------|
| 1  | 3.322269000  | 1.180033000   | -1.861013000 | 15 | -0.692000000 | 0.676424000   | 0.126696000  |
| 1  | 4.352371000  | 0.103946000   | -0.906761000 | 6  | -0.815314000 | 2.188062000   | 1.094539000  |
| 1  | 1.409942000  | 2.286660000   | 0.629742000  | 6  | 0.222179000  | -0.436134000  | 1.211113000  |
| 1  | 0.651083000  | 1.855858000   | -0.922997000 | 1  | -1.270641000 | 2.010652000   | 2.069751000  |
| 1  | 3.899934000  | 1.697440000   | -0.260765000 | 1  | 0.200053000  | 2.563078000   | 1.241016000  |
| 1  | 0.043772000  | 1.158103000   | 0.593813000  | 1  | -0.240178000 | -0.459446000  | 2.198941000  |
| 1  | 3.389969000  | -0.946478000  | 1.619820000  | 1  | 0.251557000  | -1.441990000  | 0.795312000  |
| 6  | 0.765530000  | -1.747001000  | -0.468432000 | 1  | 1.243722000  | -0.062413000  | 1.309168000  |
| 6  | -0.383249000 | -1.554344000  | 0.288347000  | 1  | -1.384999000 | 2.945887000   | 0.556373000  |
| 6  | -1.463916000 | -0.810645000  | -0.279652000 | 6  | 0.794758000  | 1.344016000   | -1.470626000 |
| 8  | -1.502552000 | -0.345241000  | -1.417043000 | 6  | 2.036480000  | 1.409727000   | -0.851154000 |
| 8  | -2.501559000 | -0.639063000  | 0.582973000  | 6  | 2.824830000  | 0.219401000   | -0.768260000 |
| 6  | -3.576816000 | 0.183755000   | 0.133462000  | 8  | 2.523598000  | -0.878774000  | -1.231944000 |
| 6  | -3.238821000 | 1.650932000   | 0.284922000  | 6  | 3.990427000  | 0.400586000   | -0.092475000 |
| 1  | 1.518218000  | -2.448436000  | -0.128582000 | 8  | 4.781819000  | -0.763524000  | 0.141033000  |
| 1  | 0.688674000  | -1.654554000  | -1.543908000 | 6  | 4.249451000  | -1.553961000  | 1.316293000  |
| 1  | -3.811523000 | -0.058153000  | -0.903145000 | 1  | 0.260961000  | 2.260057000   | -1.696711000 |
| 1  | -4.427070000 | -0.087177000  | 0.758130000  | 1  | 0.616419000  | 0.535676000   | -2.168156000 |
| 1  | -4.090125000 | 2.266318000   | -0.009559000 | 1  | 4.806945000  | -1.373475000  | -0.761916000 |
| 1  | -2.992319000 | 1.880074000   | 1.322831000  | 1  | 5.786197000  | -0.342270000  | 0.342270000  |
| 1  | -2.388783000 | 1.912597000   | -0.346061000 | 1  | 4.892812000  | -2.411906000  | 1.516427000  |
| 1  | -0.436543000 | -1.834798000  | 1.331679000  | 1  | 4.218657000  | -0.931530000  | 2.211882000  |
|    |              | 1_TS_PMe3_3   |              |    |              |               |              |
| 15 | -2.270184000 | -0.066299000  | -0.125968000 | 1  | 2.366532000  | 2.291265000   | -0.318272000 |
| 6  | -2.723000000 | 1.056175000   | 1.209859000  | 6  | -2.356410000 | -0.012073000  | 0.059059000  |
| 6  | -3.855392000 | -0.808414000  | -0.603642000 | 6  | -2.512331000 | -0.329840000  | -0.387335000 |
| 6  | -1.417339000 | -1.401908000  | 0.730134000  | 6  | -3.494692000 | 0.742927000   | 0.350343000  |
| 1  | -3.239288000 | 0.525058000   | 2.011601000  | 6  | -3.776351000 | -1.8844369000 | -0.519107000 |
| 1  | -1.819669000 | 1.515227000   | 1.615931000  | 6  | -4.761355000 | 0.186365000   | 0.209031000  |
| 1  | -3.686380000 | -1.592129000  | -1.342348000 | 6  | -4.905926000 | -1.126286000  | -0.222120000 |
| 1  | -4.497797000 | -0.047701000  | -1.047944000 | 1  | -1.637009000 | -1.921251000  | -0.634144000 |
| 1  | -2.025118000 | -1.765365000  | 1.561299000  | 1  | -3.399031000 | 1.764978000   | 0.694987000  |
| 1  | -1.218151000 | -2.222592000  | 0.041410000  | 1  | -3.881998000 | -2.970202000  | -0.857981000 |
| 1  | -4.360153000 | -1.238740000  | 0.264734000  | 1  | -5.635865000 | 0.780369000   | 0.442485000  |
| 1  | -0.468979000 | -1.034075000  | 1.124545000  | 1  | -5.892819000 | -1.5577664000 | -0.328680000 |
| 1  | -3.373464000 | 1.843661000   | 0.826626000  |    |              | 1_TS_PPhMe2_3 |              |
| 6  | -0.615526000 | 1.164805000   | -1.138072000 | 15 | -0.837833000 | 0.611308000   | 0.048886000  |
| 6  | 0.431828000  | 1.243258000   | -0.229645000 | 6  | -0.971145000 | 2.349059000   | 0.494634000  |
| 6  | 1.439007000  | 0.227885000   | -0.232143000 | 6  | -0.082796000 | -0.138491000  | 1.502261000  |
| 8  | 1.483516000  | -0.749937000  | -0.976037000 | 1  | -1.523843000 | 2.487537000   | 1.424733000  |
| 8  | 2.397263000  | 0.436020000   | 0.710580000  | 1  | 0.043545000  | 2.730379000   | 0.626899000  |
| 6  | 3.481972000  | -0.490089000  | 0.740955000  | 1  | -0.618202000 | 0.162609000   | 2.403847000  |
| 6  | 4.525264000  | -0.148151000  | -0.299437000 | 1  | -0.087935000 | -1.224251000  | 1.419845000  |
| 1  | -1.250408000 | 2.028107000   | -1.296058000 | 1  | 0.951079000  | 0.204856000   | 1.572160000  |
| 1  | -0.488287000 | 0.533641000   | -2.008259000 | 1  | -1.448900000 | 2.917224000   | -0.303709000 |
| 1  | 3.895199000  | -0.415734000  | 1.746238000  | 6  | 0.820091000  | 0.732640000   | -1.514435000 |
| 1  | 3.099096000  | -1.499929000  | 0.592221000  | 6  | 1.990786000  | 1.058729000   | -0.841477000 |
| 1  | 5.365629000  | -0.840344000  | -0.230147000 | 6  | 2.811221000  | 0.009816000   | -0.318851000 |
| 1  | 4.101093000  | -0.218833000  | -1.300730000 | 8  | 2.582496000  | -1.195701000  | -0.395657000 |
| 1  | 4.900656000  | 0.864483000   | -0.146467000 | 8  | 3.922306000  | 0.475416000   | 0.311335000  |
| 1  | 0.471658000  | 2.009719000   | 0.532468000  | 6  | 4.839490000  | -0.500359000  | 0.804047000  |
|    |              | 1_TS_PPhMe2_1 |              |    |              |               |              |
| 15 | 0.826605000  | 0.565179000   | -0.033849000 | 6  | 5.749363000  | -1.001383000  | -0.295373000 |
| 6  | 0.846227000  | 2.258472000   | -0.641977000 | 1  | 0.312568000  | 1.491658000   | -2.098211000 |
| 6  | 0.004697000  | -0.344858000  | -1.353453000 | 1  | 0.719209000  | -0.273891000  | -1.900538000 |
| 1  | 1.332563000  | 2.333223000   | -1.615404000 | 1  | 5.409647000  | 0.007675000   | 1.580977000  |
| 1  | -0.192048000 | 2.582326000   | -0.739748000 | 1  | 4.284263000  | -1.322283000  | 1.256338000  |
| 1  | 0.465726000  | -0.115162000  | -2.315117000 | 1  | 6.470280000  | -1.713231000  | 0.109125000  |
| 1  | 0.054289000  | -1.417048000  | -1.170093000 | 1  | 5.169132000  | -1.500281000  | -1.071251000 |
| 1  | -1.043612000 | -0.041538000  | -1.381160000 | 1  | 6.299006000  | -0.173142000  | -0.744342000 |
| 1  | 1.344514000  | 2.918597000   | 0.068226000  | 1  | 2.262135000  | 2.084099000   | -0.629553000 |
| 6  | -0.717855000 | 0.760474000   | 1.633635000  | 6  | -2.524488000 | -0.025550000  | 0.028219000  |
| 6  | -1.947713000 | 0.979655000   | 1.025929000  | 6  | -2.711321000 | -1.412493000  | -0.011494000 |
| 6  | -2.752795000 | -0.144076000  | 0.657478000  | 6  | -3.642423000 | 0.809412000   | -0.033319000 |
| 8  | -2.465807000 | -1.328402000  | 0.820348000  | 6  | -3.987158000 | -1.950025000  | -0.088922000 |
| 8  | -3.928683000 | 0.211348000   | 0.079053000  | 6  | -4.920166000 | 0.267268000   | -0.119674000 |
| 6  | -4.791515000 | -0.858087000  | -0.301737000 | 6  | -5.096563000 | -1.110409000  | -0.144398000 |
| 6  | -6.029593000 | -0.252043000  | -0.914636000 | 1  | -1.850618000 | -2.072104000  | 0.016465000  |
| 1  | -0.205238000 | 1.586672000   | 2.112193000  | 1  | -3.522985000 | 1.885257000   | -0.007583000 |
| 1  | -0.543903000 | -0.203789000  | 2.094599000  | 1  | -4.117576000 | -3.024408000  | -0.110555000 |
| 1  | -4.272346000 | -1.507459000  | -1.009656000 | 1  | -5.778785000 | 0.925376000   | -0.161986000 |
| 1  | -5.034495000 | -1.458348000  | 0.577229000  | 1  | -6.092288000 | -1.529694000  | -0.208691000 |
|    |              |               |              |    |              | 1_TS_PPh2Me_1 |              |
| 1  | -6.717661000 | -1.040621000  | -1.219906000 | 6  | -0.832261000 | -0.766378000  | 1.712661000  |
| 1  | -6.540231000 | 0.391372000   | -0.197537000 | 6  | -2.038942000 | -0.217630000  | 1.278625000  |
| 1  | -5.775476000 | 0.341620000   | -1.793329000 | 6  | -2.957000000 | -1.030202000  | 0.546694000  |
| 1  | -2.280655000 | 1.970725000   | 0.748736000  | 8  | -2.804705000 | -2.211411000  | 0.235963000  |
| 6  | 2.539037000  | 0.003369000   | -0.082295000 | 8  | -4.092549000 | -0.367195000  | 0.200735000  |
| 6  | 2.797573000  | -1.367821000  | 0.031831000  | 6  | -5.071819000 | -1.122929000  | -0.507043000 |
| 6  | 3.615717000  | 0.891300000   | -0.141335000 | 6  | -6.239246000 | -0.209783000  | -0.788912000 |
| 6  | 4.101260000  | -1.839258000  | 0.064453000  | 1  | -0.269386000 | -0.261121000  | 2.488348000  |
| 6  | 4.921881000  | 0.415953000   | -0.100225000 | 1  | -0.756432000 | -1.847697000  | 1.740010000  |
| 6  | 5.168563000  | -0.947559000  | -0.000668000 | 1  | -5.374181000 | -1.981401000  | 0.096038000  |
| 1  | 1.971994000  | -2.067939000  | 0.096932000  | 1  | -4.635055000 | -1.508674000  | -1.430555000 |
| 1  | 3.440916000  | 1.956427000   | -0.226183000 | 1  | -5.926913000 | 0.641619000   | -1.394501000 |
| 1  | 4.286229000  | -2.902857000  | 0.144393000  | 1  | -7.013915000 | -0.751995000  | -1.331598000 |
| 1  | 5.747295000  | 1.114656000   | -0.151571000 | 1  | -6.688877000 | 0.165605000   | 0.140329000  |
| 1  | 6.186083000  | -1.315236000  | 0.027923000  | 1  | -2.278011000 | 0.825083000   | 1.436634000  |
|    |              | 1_TS_PPhMe2_2 |              | 15 | 0.670800000  | -0.395767000  | 0.090591000  |

|    |              |               |              |    |              |              |               |
|----|--------------|---------------|--------------|----|--------------|--------------|---------------|
| 6  | 0.714121000  | 1.395304000   | 0.027943000  | 6  | -0.875820000 | 1.134257000  | 1.264002000   |
| 6  | 2.391661000  | -0.921448000  | -0.097090000 | 6  | -1.680128000 | 2.248659000  | 1.041990000   |
| 6  | 3.244965000  | -0.326084000  | -1.030457000 | 6  | -1.466600000 | 3.051070000  | -0.070237000  |
| 6  | 4.548921000  | -0.778896000  | -1.169174000 | 6  | -0.440764000 | 2.745961000  | -0.963651000  |
| 6  | 5.010257000  | -1.828268000  | -0.377786000 | 6  | 0.352105000  | 1.630100000  | -0.753589000  |
| 6  | 4.167904000  | -2.423506000  | 0.552248000  | 6  | 3.326372000  | -1.207477000 | -0.950111000  |
| 6  | 2.860885000  | -1.968958000  | 0.694331000  | 6  | 4.638688000  | -0.974325000 | -1.349428000  |
| 6  | 1.659861000  | 2.085548000   | 0.794539000  | 6  | 5.348283000  | 0.088511000  | -0.806350000  |
| 6  | 1.644607000  | 3.470606000   | 0.847273000  | 6  | 4.750035000  | 0.921691000  | 0.136582000   |
| 6  | 0.676547000  | 4.184889000   | 0.144710000  | 6  | 3.442343000  | 0.689594000  | 0.536715000   |
| 6  | -0.271646000 | 3.508033000   | -0.609925000 | 1  | -1.046662000 | 0.519426000  | 2.138491000   |
| 6  | -0.255226000 | 2.117417000   | -0.670942000 | 1  | -2.472743000 | 2.485583000  | 1.740501000   |
| 1  | 2.885437000  | 0.492502000   | -1.644169000 | 1  | -2.092605000 | 3.917450000  | -0.241778000  |
| 1  | 5.206841000  | -0.315733000  | -1.893273000 | 1  | -0.268098000 | 3.374767000  | -1.827516000  |
| 1  | 6.028593000  | -2.178659000  | -0.486987000 | 1  | 1.134909000  | 1.273399000  | -1.461635000  |
| 1  | 4.526494000  | -3.237015000  | 1.169421000  | 1  | 2.766796000  | -2.032771000 | -1.375145000  |
| 1  | 2.201812000  | -2.427497000  | 1.422736000  | 1  | 5.101967000  | -1.619384000 | -2.084634000  |
| 1  | 2.412045000  | 1.532615000   | 1.346445000  | 1  | 6.368522000  | 0.272598000  | -1.117722000  |
| 1  | 2.385970000  | 3.994942000   | 1.436383000  | 1  | 5.304057000  | 1.751386000  | 0.556459000   |
| 1  | 0.664566000  | 5.266387000   | 0.187313000  | 1  | 2.972325000  | 1.340539000  | 1.265762000   |
| 1  | -1.026125000 | 4.059059000   | -1.156502000 | 6  | 1.136811000  | -1.063695000 | 2.276882000   |
| 1  | -0.995250000 | 1.600225000   | -1.268809000 | 1  | 0.160133000  | -1.377918000 | 2.648814000   |
| 6  | -0.140689000 | -0.907832000  | -1.430764000 | 1  | 1.846464000  | -1.876987000 | -2.432190000  |
| 1  | -0.027224000 | -1.986072000  | -1.540305000 | 1  | 1.467682000  | -0.183509000 | 2.829609000   |
| 1  | -1.203947000 | -0.672058000  | -1.379194000 |    |              |              |               |
| 1  | 0.302204000  | -0.404108000  | -2.291784000 |    |              |              |               |
|    |              | 1_TS_PPh2Me_2 |              |    |              | 1_TS_PPh3_1  |               |
| 6  | -0.857756000 | -0.774090000  | -1.880238000 | 15 | -0.819154000 | -0.016985000 | -0.376930000  |
| 6  | -1.969898000 | -1.462544000  | -1.408857000 | 6  | -1.510147000 | 1.585816000  | 0.030209000   |
| 6  | -3.045757000 | -0.726417000  | -0.831912000 | 6  | -2.151393000 | -1.216132000 | -0.268365000  |
| 8  | -3.109195000 | 0.500819000   | -0.727898000 | 6  | 0.396924000  | -0.449444000 | 0.853480000   |
| 8  | -4.049304000 | -1.518710000  | -0.371049000 | 6  | -3.014568000 | -1.311603000 | -1.363597000  |
| 6  | -5.115012000 | -0.870509000  | 0.320976000  | 6  | -4.083080000 | -2.197493000 | -2.1338082000 |
| 6  | -4.734263000 | -0.582485000  | 1.756665000  | 6  | -4.286902000 | -3.005719000 | -0.224532000  |
| 1  | -0.106278000 | -1.303699000  | -2.453427000 | 6  | -3.425520000 | -2.922406000 | 0.864199000   |
| 1  | -0.987973000 | 2.064697000   | -2.167833000 | 6  | -2.362139000 | -2.028463000 | 0.846886000   |
| 1  | -5.953714000 | -1.563831000  | 0.271775000  | 6  | 0.815579000  | 0.413473000  | 1.868156000   |
| 1  | -5.386001000 | 0.045654000   | -0.203600000 | 6  | 1.856019000  | 0.044489000  | 2.708462000   |
| 1  | -3.896510000 | 0.114420000   | 1.795632000  | 6  | 2.492724000  | -1.183018000 | 2.538394000   |
| 1  | -5.576677000 | -0.138313000  | 2.288711000  | 6  | 2.078890000  | -2.048193000 | 1.533284000   |
| 1  | -4.451254000 | -1.503415000  | 2.268586000  | 6  | 1.037729000  | -1.681478000 | 0.688212000   |
| 1  | -1.981677000 | -2.541185000  | -1.331566000 | 6  | -2.819277000 | 1.761205000  | 0.482574000   |
| 15 | 0.518170000  | -0.199289000  | -0.133492000 | 6  | -3.299025000 | 3.039666000  | 0.737507000   |
| 6  | 2.083109000  | -1.052557000  | 0.064166000  | 6  | -2.477882000 | 4.145822000  | 0.546317000   |
| 6  | 0.829754000  | 1.565456000   | 0.030885000  | 6  | -1.173556000 | 3.975956000  | 0.093072000   |
| 6  | 2.076686000  | 2.120019000   | 0.324120000  | 6  | -0.690821000 | 2.702168000  | -0.175547000  |
| 6  | 2.221458000  | 3.499050000   | 0.414599000  | 1  | -2.848135000 | -0.686586000 | -2.234543000  |
| 6  | 1.126663000  | 4.333473000   | 0.218059000  | 1  | -4.750137000 | -2.262656000 | -2.187761000  |
| 6  | -0.118720000 | 3.786269000   | -0.073059000 | 1  | -5.115306000 | -3.702140000 | -0.206376000  |
| 6  | -0.267653000 | 2.409721000   | -0.176079000 | 1  | -3.584466000 | -3.550478000 | 1.731227000   |
| 6  | 2.310327000  | -1.976647000  | 1.085101000  | 1  | -1.697793000 | -1.959836000 | 1.699584000   |
| 6  | 3.512404000  | -2.673714000  | 1.142160000  | 1  | 0.332364000  | 1.373887000  | 1.998119000   |
| 6  | 4.494743000  | -2.454527000  | 0.184869000  | 1  | 2.172459000  | 0.715188000  | 3.496822000   |
| 6  | 4.272637000  | -1.539419000  | -0.841089000 | 1  | 3.308341000  | -1.464142000 | 3.192543000   |
| 6  | 3.071054000  | -0.851216000  | -0.907344000 | 1  | 2.568810000  | -3.004258000 | 1.400644000   |
| 1  | 2.932940000  | 1.478726000   | 0.491876000  | 1  | 0.709375000  | -2.357091000 | -0.093354000  |
| 1  | 3.191028000  | 3.921389000   | 0.645937000  | 1  | -3.460653000 | 0.902090000  | 0.638029000   |
| 1  | 1.244054000  | 5.407078000   | 0.290434000  | 1  | -4.313907000 | 3.171266000  | 1.090116000   |
| 1  | -0.973689000 | 4.431852000   | -0.227840000 | 1  | -2.855576000 | 5.140226000  | 0.746854000   |
| 1  | -1.236938000 | 1.978930000   | -0.412162000 | 1  | -0.534561000 | 4.836138000  | -0.059365000  |
| 1  | 1.554275000  | -2.155339000  | 1.839296000  | 1  | 0.323399000  | 2.557519000  | -0.536573000  |
| 1  | 3.679933000  | -3.387455000  | 1.938500000  | 6  | 0.311025000  | -0.057588000 | -2.341299000  |
| 1  | 5.429586000  | -2.997794000  | 0.232851000  | 6  | 1.594755000  | -0.574094000 | -2.167178000  |
| 1  | 5.032928000  | -1.369706000  | -1.592452000 | 8  | 2.550183000  | 0.241993000  | -1.496925000  |
| 1  | 2.892353000  | -0.148033000  | -1.714150000 | 8  | 2.360991000  | 1.402431000  | -1.122191000  |
| 6  | -0.506829000 | -0.628500000  | 1.274592000  | 6  | 3.735406000  | -0.376527000 | -1.260372000  |
| 1  | -1.391144000 | 0.010518000   | 1.240853000  | 6  | 4.682217000  | 0.353212000  | -0.485407000  |
| 1  | -0.833514000 | -1.666968000  | 1.188838000  | 6  | 5.8254464000 | -0.577808000 | -0.165909000  |
| 1  | 0.016034000  | -0.473239000  | 2.217996000  | 1  | -0.416203000 | -0.627083000 | -2.910813000  |
|    |              | 1_TS_PPh2Me_3 |              | 1  | 0.212695000  | 1.018686000  | -2.450020000  |
| 6  | -0.430019000 | -2.296004000  | -0.087740000 | 1  | 4.198957000  | 0.716792000  | 0.424439000   |
| 6  | -1.650484000 | -1.926302000  | 0.483156000  | 1  | 5.022492000  | 1.225113000  | -1.048752000  |
| 6  | -2.529318000 | -1.065097000  | -0.241929000 | 1  | 6.580214000  | -0.055202000 | 0.422182000   |
| 8  | -2.352159000 | -0.634660000  | -1.380453000 | 1  | 5.471481000  | -1.434378000 | -0.410543000  |
| 8  | -3.651455000 | -0.745162000  | 0.461782000  | 1  | 6.294331000  | -0.945390000 | -1.079276000  |
| 6  | -4.597934000 | 0.098287000   | -0.189603000 | 1  | 1.814767000  | -1.622296000 | -2.313282000  |
| 6  | -5.520245000 | -0.698708000  | -1.085842000 | 15 |              |              |               |
| 1  | 0.122375000  | -3.124314000  | 0.342858000  | 6  | -0.797449000 | 0.003856000  | -0.353242000  |
| 1  | -0.336817000 | -2.213486000  | -1.164127000 | 6  | -1.317689000 | 1.671546000  | 0.045039000   |
| 1  | -4.068184000 | 0.864061000   | -0.757726000 | 6  | -2.263999000 | -1.031872000 | -0.361930000  |
| 1  | -5.156120000 | 0.580532000   | 0.612901000  | 6  | 0.274102000  | -0.586653000 | 0.943836000   |
| 1  | -6.044606000 | -1.464275000  | -0.512333000 | 6  | -3.048628000 | -1.518460000 | -1.518460000  |
| 1  | -6.262771000 | -0.042050000  | -1.541703000 | 6  | -4.208936000 | -1.775522000 | -1.587995000  |
| 1  | -4.951652000 | -1.182093000  | -1.879982000 | 6  | -4.584345000 | -2.567583000 | -0.507993000  |
| 1  | -1.903342000 | -2.185503000  | 1.502512000  | 6  | -3.802603000 | -2.594288000 | 0.642081000   |
| 15 | 1.026218000  | -0.732996000  | 0.510742000  | 6  | -2.647115000 | -1.826926000 | 0.719405000   |
| 6  | 2.723312000  | -0.380012000  | -0.004611000 | 6  | 0.716741000  | 0.204893000  | 2.050709000   |
| 6  | 0.139029000  | 0.811334000   | 0.360835000  | 6  | 1.652047000  | -0.293645000 | 2.900676000   |
|    |              |               |              | 6  | 2.159165000  | -1.581175000 | 2.740011000   |
|    |              |               |              | 6  | 1.718155000  | -2.376772000 | 1.690093000   |

|    |              |              |              |    |              |              |              |
|----|--------------|--------------|--------------|----|--------------|--------------|--------------|
| 6  | 0.781898000  | -1.880795000 | 0.790272000  | 6  | -0.660995000 | -0.711748000 | -0.470140000 |
| 6  | -2.626476000 | 2.001150000  | 0.401690000  | 6  | 0.878887000  | 1.671746000  | 0.075669000  |
| 6  | -2.963438000 | 3.325046000  | 0.653882000  | 6  | 2.127647000  | -0.930495000 | 0.193550000  |
| 6  | -1.999977000 | 4.323154000  | 0.554764000  | 6  | -0.094485000 | 2.602807000  | 0.444479000  |
| 6  | -0.694941000 | 3.999571000  | 0.196972000  | 6  | 0.036082000  | 3.946892000  | 0.116938000  |
| 6  | -0.353467000 | 2.680316000  | -0.068125000 | 6  | 1.170261000  | 4.377602000  | -0.572372000 |
| 1  | -2.747246000 | -0.405373000 | -2.362599000 | 6  | 2.157849000  | 3.455293000  | -0.932251000 |
| 1  | -4.813614000 | -1.755961000 | -2.485291000 | 6  | 2.012001000  | 2.118850000  | -0.613729000 |
| 1  | -5.484438000 | -3.166138000 | -0.563350000 | 6  | 2.330471000  | -1.639604000 | -0.996965000 |
| 1  | -4.095041000 | -3.209953000 | 1.482873000  | 6  | 3.520966000  | -2.300211000 | -1.227970000 |
| 1  | -2.044379000 | -1.843630000 | 1.619185000  | 6  | 4.544383000  | -2.262492000 | -0.274896000 |
| 1  | 0.335338000  | 1.210838000  | 2.129273000  | 6  | 4.358860000  | -1.559553000 | 0.915645000  |
| 1  | 1.987589000  | 0.322715000  | 3.724722000  | 6  | 3.151337000  | -0.908993000 | 1.139639000  |
| 1  | 2.893332000  | -1.963821000 | 3.437513000  | 6  | -1.041999000 | -2.039492000 | -0.225295000 |
| 1  | 2.105492000  | -3.379739000 | 1.565822000  | 6  | -2.094005000 | -2.012207000 | -0.914042000 |
| 1  | 0.432648000  | -2.502305000 | -0.026436000 | 6  | -2.805459000 | -1.860573000 | -1.851871000 |
| 1  | -3.378846000 | 1.226161000  | 0.485621000  | 6  | -2.429119000 | -0.543767000 | -2.118292000 |
| 1  | -3.978809000 | 3.576390000  | 0.932256000  | 6  | -1.366504000 | 0.019439000  | -1.422498000 |
| 1  | -2.266822000 | 5.353297000  | 0.752971000  | 1  | -0.974311000 | 2.265465000  | 0.985715000  |
| 1  | 0.055139000  | 4.775729000  | 0.116464000  | 1  | -0.737266000 | 4.673380000  | 0.407338000  |
| 1  | 0.660486000  | 2.415807000  | -0.354378000 | 1  | 3.030068000  | 3.810512000  | -1.466070000 |
| 6  | 0.447270000  | -0.134142000 | -2.245283000 | 1  | 2.783283000  | 1.415300000  | -0.904202000 |
| 6  | 1.642752000  | -0.813692000 | -2.015452000 | 1  | 1.547723000  | -1.672298000 | -1.745441000 |
| 6  | 2.657745000  | -0.141582000 | -1.276377000 | 1  | 3.686034000  | -2.852347000 | -2.144253000 |
| 8  | 2.587762000  | 1.018996000  | -0.863538000 | 1  | 5.133653000  | -1.522623000 | 1.667982000  |
| 8  | 3.749539000  | -0.910695000 | -1.023493000 | 1  | 3.007814000  | -0.372792000 | 2.071835000  |
| 6  | 4.779599000  | -0.324453000 | -0.230972000 | 1  | -0.498468000 | -2.628321000 | 0.505088000  |
| 6  | 5.714049000  | 0.515621000  | -1.073211000 | 1  | -2.398118000 | -3.633814000 | -0.725585000 |
| 1  | -0.308586000 | -0.592213000 | -2.874891000 | 1  | -2.960889000 | 0.049948000  | -2.848195000 |
| 1  | 0.491658000  | 0.948405000  | -2.323569000 | 1  | -1.092669000 | 1.047271000  | -1.627619000 |
| 1  | 5.309460000  | -1.163582000 | 0.219613000  | 6  | -0.169074000 | -0.267500000 | 2.718937000  |
| 1  | 4.327534000  | 0.271263000  | 0.563473000  | 6  | -1.344606000 | -1.008242000 | 2.759456000  |
| 1  | 6.517690000  | 0.918952000  | -0.455274000 | 6  | -2.563523000 | -2.379274000 | 2.307600000  |
| 1  | 6.159697000  | -0.086347000 | -1.866278000 | 8  | -2.686475000 | 0.795315000  | 2.016472000  |
| 1  | 5.173216000  | 1.347009000  | -1.524503000 | 8  | -3.639930000 | -1.209364000 | 2.431218000  |
| 1  | 1.740360000  | -1.876005000 | -2.190140000 | 6  | -4.900506000 | -0.663501000 | 2.049721000  |
|    |              | 1_TS_PPh3_3  |              | 6  | -5.085180000 | -0.696846000 | 0.548136000  |
| 15 | -0.767170000 | -0.027110000 | -0.326852000 | 1  | 0.740014000  | -0.691626000 | 3.131125000  |
| 6  | -2.482845000 | -0.520713000 | -0.503723000 | 1  | -0.245995000 | -0.822113000 | 0.822113000  |
| 6  | 0.008481000  | -1.095602000 | 0.872210000  | 1  | -4.982736000 | 0.355614000  | 2.428216000  |
| 6  | -0.761041000 | 1.638352000  | 0.342090000  | 1  | -5.645746000 | -1.283152000 | 2.547640000  |
| 6  | 1.348639000  | -0.826964000 | 1.178888000  | 1  | -5.011915000 | -1.719858000 | 0.174447000  |
| 6  | 2.043760000  | -1.655809000 | 2.049991000  | 1  | -6.067026000 | -0.300911000 | 0.282162000  |
| 6  | 1.416759000  | -2.766363000 | 2.603743000  | 1  | -4.320024000 | -0.009273000 | 0.062538000  |
| 6  | 0.089672000  | -3.043834000 | 2.292396000  | 1  | -1.342258000 | -2.076886000 | 2.923157000  |
| 6  | -0.614064000 | -2.214195000 | 1.429169000  | 8  | 5.671354000  | -2.933900000 | -0.583691000 |
| 6  | -0.576877000 | 1.913671000  | 1.698008000  | 6  | 6.735017000  | -2.919530000 | 0.350418000  |
| 6  | -0.595237000 | 3.227403000  | 2.148629000  | 1  | 7.536661000  | -3.508992000 | -0.085833000 |
| 6  | -0.803894000 | 4.270839000  | 1.253170000  | 1  | 7.089862000  | -1.901584000 | 0.526670000  |
| 6  | -0.992329000 | 4.002146000  | -0.098285000 | 1  | 6.432153000  | -3.367698000 | 1.299354000  |
| 6  | -0.964324000 | 2.691324000  | -0.554298000 | 8  | -3.851825000 | -2.476752000 | -2.441941000 |
| 6  | -2.741239000 | -1.709768000 | -1.194813000 | 6  | -4.698140000 | -1.700851000 | -3.268577000 |
| 6  | -4.047047000 | -2.134735000 | -1.392957000 | 1  | -5.512096000 | -2.351453000 | -3.576710000 |
| 6  | -5.106384000 | -1.365730000 | -0.920970000 | 1  | -5.104070000 | -0.847159000 | -2.718611000 |
| 6  | -4.856327000 | -0.176401000 | -0.245916000 | 1  | -4.169773000 | -1.342261000 | -4.154800000 |
| 6  | -3.549766000 | 0.246913000  | -0.034553000 | 8  | 1.394253000  | 5.660108000  | -0.925123000 |
| 1  | 1.830808000  | 0.049769000  | 0.758484000  | 6  | 0.417446000  | 6.626122000  | -0.584477000 |
| 1  | 3.074744000  | -1.433643000 | 2.294242000  | 1  | 0.784352000  | 7.579773000  | -0.953906000 |
| 1  | 1.960706000  | -3.414419000 | 3.278862000  | 1  | -0.541244000 | 6.400311000  | -1.057080000 |
| 1  | -0.401754000 | -3.904268000 | 2.727907000  | 1  | 0.282375000  | 6.685564000  | 0.497805000  |
| 1  | -1.649365000 | -2.432495000 | 1.198670000  |    |              | 1_TS_Pani3_2 |              |
| 1  | -0.420842000 | 1.103398000  | 2.399524000  | 15 | 0.490469000  | 0.022166000  | 0.680329000  |
| 1  | -0.449980000 | 3.435705000  | 3.200769000  | 6  | 1.172646000  | 1.579979000  | 0.124313000  |
| 1  | -0.816824000 | 5.293267000  | 1.608024000  | 6  | 1.783536000  | 1.1211582000 | 0.535945000  |
| 1  | -1.150914000 | 4.812432000  | -0.797814000 | 6  | -0.809552000 | -0.443595000 | -0.445098000 |
| 1  | -1.101718000 | 2.482321000  | -1.609670000 | 6  | 2.728092000  | -1.299504000 | 1.568385000  |
| 1  | -1.913927000 | -2.302603000 | -1.570906000 | 6  | 3.754951000  | -2.220039000 | 1.512975000  |
| 1  | -4.238575000 | -3.059205000 | -1.922019000 | 6  | 3.854023000  | -3.093065000 | 0.424311000  |
| 1  | -6.125624000 | -1.691971000 | -1.082707000 | 6  | 2.918355000  | -3.023754000 | -0.607676000 |
| 1  | -5.679642000 | 0.423059000  | 0.120548000  | 6  | 1.895618000  | -2.083433000 | -0.544213000 |
| 1  | -3.360753000 | 1.172507000  | 0.495500000  | 6  | -1.181261000 | 0.302163000  | -1.570409000 |
| 6  | 0.411361000  | -0.238683000 | -2.248460000 | 6  | -2.244980000 | -0.094582000 | -2.356182000 |
| 6  | 1.664335000  | -0.826612000 | -2.077323000 | 6  | -2.974785000 | -1.242101000 | -2.027355000 |
| 6  | 2.756085000  | -0.014441000 | -1.659852000 | 6  | -2.613347000 | -2.000718000 | -0.915980000 |
| 8  | 2.699815000  | 1.185409000  | -1.381092000 | 6  | -1.540680000 | -1.590535000 | -0.131613000 |
| 8  | 3.931965000  | -0.695645000 | -1.578013000 | 6  | 2.446396000  | 1.714027000  | -0.421250000 |
| 6  | 5.063672000  | 0.029057000  | -1.102069000 | 6  | 2.938972000  | 2.959663000  | -0.796346000 |
| 6  | 5.087289000  | 0.074977000  | 0.409949000  | 6  | 2.144140000  | 4.092901000  | -0.628696000 |
| 1  | -0.365873000 | -0.799985000 | -2.757672000 | 6  | 0.862531000  | 3.969768000  | -0.080540000 |
| 1  | 0.387963000  | 0.828383000  | -2.448132000 | 6  | 0.388016000  | 2.731148000  | 0.301036000  |
| 1  | 5.055051000  | 1.034486000  | -1.522684000 | 1  | 2.655585000  | -0.633788000 | 2.421793000  |
| 1  | 5.931821000  | -0.504672000 | -1.487399000 | 1  | 4.487922000  | -2.292042000 | 2.306054000  |
| 1  | 5.979861000  | 0.597639000  | 0.757175000  | 1  | 2.977689000  | -3.688827000 | -1.457500000 |
| 1  | 4.210452000  | 0.602015000  | 0.788337000  | 1  | 1.176374000  | -2.033862000 | -1.353096000 |
| 1  | 5.099139000  | -0.935647000 | 0.820882000  | 1  | -0.632136000 | 1.198445000  | -1.832513000 |
| 1  | 1.806492000  | -1.896518000 | -2.143358000 | 1  | -2.539459000 | 0.476086000  | -3.227577000 |
|    |              | 1_TS_Pani3_1 |              | 1  | -3.160704000 | -2.892759000 | -0.646667000 |
| 15 | 0.621727000  | -0.031088000 | 0.562654000  | 1  | -1.258913000 | -2.186910000 | 0.728691000  |

|    |              |              |              |    |              |              |              |
|----|--------------|--------------|--------------|----|--------------|--------------|--------------|
| 1  | 3.070572000  | 0.839154000  | -0.560696000 | 1  | -4.634526000 | -0.823263000 | -3.719211000 |
| 1  | 3.931817000  | 3.034229000  | -1.216474000 | 1  | -5.898174000 | -1.909034000 | -3.101862000 |
| 1  | 0.262879000  | 4.862135000  | 0.044929000  | 1  | -5.363112000 | -0.524842000 | -2.119816000 |
| 1  | -0.604141000 | 2.637540000  | 0.734109000  | 8  | 1.877564000  | 5.578378000  | -0.882143000 |
| 6  | -0.505966000 | 0.176532000  | 2.761485000  | 6  | 1.020831000  | 6.626748000  | -0.469322000 |
| 6  | -1.818652000 | -0.278822000 | 2.747696000  | 1  | 1.453580000  | 7.547505000  | -0.850701000 |
| 6  | -2.825169000 | 0.556281000  | 2.180292000  | 1  | 0.017319000  | 6.501108000  | -0.882138000 |
| 8  | -2.645199000 | 1.681510000  | 1.710017000  | 1  | 0.960098000  | 6.679970000  | 0.619984000  |
| 8  | -4.064780000 | -0.004481000 | 2.201620000  |    |              | 1_TS_Ppfp3_1 |              |
| 6  | -5.120349000 | 0.743971000  | 1.603008000  | 15 | -0.651331000 | -0.004618000 | -0.465816000 |
| 6  | -5.143320000 | 0.552878000  | 0.102634000  | 6  | -1.109768000 | 1.660381000  | 0.011606000  |
| 1  | 0.248369000  | -0.392072000 | 3.294104000  | 6  | -2.131413000 | -1.014885000 | -0.368404000 |
| 1  | -0.342486000 | 1.249814000  | 2.764458000  | 6  | 0.511054000  | -0.642007000 | 0.725797000  |
| 1  | -5.007824000 | 1.797643000  | 1.858789000  | 6  | -2.994543000 | -0.997576000 | -1.467973000 |
| 1  | -6.035865000 | 0.368794000  | 2.059399000  | 6  | -4.170631000 | -1.732405000 | -1.456727000 |
| 1  | -5.965617000 | 1.119436000  | -0.337379000 | 6  | -4.454385000 | -2.491634000 | -0.335895000 |
| 1  | -4.206721000 | 0.899723000  | -0.335552000 | 6  | -3.621148000 | -2.541399000 | 0.767198000  |
| 1  | -5.277240000 | -0.501453000 | -0.148265000 | 6  | -2.453907000 | -1.791616000 | 0.746328000  |
| 1  | -2.073979000 | -1.298012000 | 3.002590000  | 6  | 1.080925000  | 0.131873000  | 1.738527000  |
| 8  | -4.019559000 | -1.534723000 | -2.830078000 | 6  | 2.085600000  | -0.387255000 | 2.539763000  |
| 6  | -4.798712000 | -2.673857000 | -2.518595000 | 6  | 2.513161000  | -1.683346000 | 2.304056000  |
| 1  | -4.199237000 | -3.586281000 | -2.562464000 | 6  | 1.971629000  | -2.482799000 | 1.316545000  |
| 1  | -5.248035000 | -2.584489000 | -1.526247000 | 6  | 0.969213000  | -0.947577000 | -0.518118000 |
| 1  | -5.585659000 | -2.724703000 | -3.266072000 | 6  | -2.372804000 | 1.994081000  | 0.504949000  |
| 8  | 2.533622000  | 5.340636000  | -0.961766000 | 6  | -2.679223000 | 3.311319000  | 0.815302000  |
| 6  | 3.825628000  | 5.511863000  | -1.513021000 | 6  | -1.705608000 | 4.275393000  | 0.627149000  |
| 1  | 4.599028000  | 5.185311000  | -0.813986000 | 6  | -0.445397000 | 3.983205000  | 0.137149000  |
| 1  | 3.930235000  | 4.961913000  | -2.451180000 | 6  | -0.153829000 | 2.665367000  | -0.181950000 |
| 1  | 3.941132000  | 6.575012000  | -1.705380000 | 1  | -2.745343000 | -0.402269000 | -2.339264000 |
| 8  | 4.877278000  | -3.969852000 | 0.454745000  | 1  | -4.852817000 | -1.731098000 | -2.295829000 |
| 6  | 5.009491000  | -4.879410000 | -0.621804000 | 1  | -3.890312000 | -1.150130000 | -1.619013000 |
| 4  | 4.127952000  | -5.518896000 | -0.706982000 | 1  | -1.792498000 | -1.811099000 | 1.603541000  |
| 1  | 5.167807000  | -4.352570000 | -1.565478000 | 1  | 0.746261000  | 1.148301000  | 1.901967000  |
| 1  | 5.878991000  | -5.492831000 | -0.402455000 | 1  | 2.537891000  | 0.193550000  | 3.332004000  |
|    |              | 1_TS_Pani3_3 |              | 1  | 2.336045000  | -3.490998000 | 1.174737000  |
| 15 | 0.659659000  | -0.046916000 | 0.564794000  | 1  | 0.528505000  | -0.556484000 | -0.262613000 |
| 6  | -0.674421000 | -0.638412000 | -0.459785000 | 1  | -3.122271000 | 1.226182000  | 0.651176000  |
| 6  | 1.041026000  | 1.638064000  | 0.091821000  | 1  | -3.649722000 | 3.593380000  | 1.200373000  |
| 6  | 2.096867000  | -1.047874000 | 0.185141000  | 1  | 0.279142000  | 4.774998000  | 0.003716000  |
| 6  | 0.183979000  | 2.649530000  | 0.530025000  | 1  | 0.823486000  | 2.401570000  | -0.575114000 |
| 6  | 0.424487000  | 3.981991000  | 0.215446000  | 6  | 0.448712000  | -0.143197000 | -2.443488000 |
| 6  | 1.552829000  | 4.316844000  | -0.533241000 | 6  | 1.663499000  | -0.809584000 | -2.285088000 |
| 6  | 2.426827000  | 3.312417000  | -0.962077000 | 6  | 2.710370000  | -0.123111000 | -1.606657000 |
| 6  | 2.172617000  | 1.990383000  | -0.654161000 | 8  | 2.646759000  | -1.038730000 | -1.194183000 |
| 6  | 2.296951000  | -1.666111000 | -1.056348000 | 8  | 3.822360000  | -0.877380000 | -1.407881000 |
| 6  | 3.441955000  | -2.397002000 | -1.301450000 | 6  | 4.888348000  | -0.674256000 | -0.674266000 |
| 6  | 4.421834000  | -2.524597000 | -0.310124000 | 6  | 5.761859000  | 0.574273000  | -1.572898000 |
| 6  | 4.237055000  | -1.917292000 | 0.931491000  | 1  | -0.342422000 | -0.616077000 | -3.016120000 |
| 6  | 3.074954000  | -1.191523000 | 1.167103000  | 1  | 0.475327000  | 0.938757000  | -2.535828000 |
| 6  | -1.033277000 | -1.989215000 | -0.338898000 | 1  | 5.453467000  | -1.105943000 | -0.254750000 |
| 6  | -2.166520000 | -2.481228000 | -0.956785000 | 1  | 4.474682000  | 0.317656000  | 0.141001000  |
| 6  | -2.989570000 | -1.622119000 | -1.688621000 | 1  | 6.595532000  | 0.987710000  | -1.003423000 |
| 6  | -2.642171000 | -0.277770000 | -1.826872000 | 1  | 6.167234000  | -0.024243000 | -2.389783000 |
| 6  | -1.493663000 | 0.201218000  | -1.208241000 | 1  | 5.186060000  | 1.398669000  | -1.992716000 |
| 1  | -0.692845000 | 2.385825000  | 1.114555000  | 1  | 1.761999000  | -1.871426000 | -2.461514000 |
| 1  | -0.260576000 | 4.742828000  | 0.561622000  | 9  | -5.585350000 | -3.213901000 | -0.319387000 |
| 1  | 3.297998000  | 3.594307000  | -1.539553000 | 9  | -1.998696000 | 5.550804000  | 0.928836000  |
| 1  | 2.857239000  | 1.223586000  | -0.996945000 | 9  | 3.492543000  | -2.185446000 | 3.075140000  |
| 1  | 1.548056000  | -1.569137000 | -1.833457000 |    |              | 1_TS_Ppfp3_2 |              |
| 1  | 3.605369000  | -2.878543000 | -2.257027000 | 15 | -0.683262000 | -0.022797000 | -0.494727000 |
| 1  | 4.977207000  | -2.010001000 | 1.713219000  | 6  | -1.345860000 | 1.577589000  | -0.038852000 |
| 1  | 2.932070000  | -0.726359000 | 2.136555000  | 6  | -1.997113000 | -1.225486000 | -0.277324000 |
| 1  | -0.412911000 | -2.659230000 | 0.246696000  | 6  | 0.624789000  | -0.446635000 | 0.638719000  |
| 1  | -2.449911000 | -3.521651000 | -0.862934000 | 6  | -2.920920000 | -1.354402000 | -1.317297000 |
| 1  | -3.258455000 | 0.399955000  | -2.400331000 | 6  | -3.978829000 | -2.254781000 | -1.210920000 |
| 1  | -1.249081000 | 1.252090000  | -1.303722000 | 6  | -4.082761000 | -3.009049000 | -0.056148000 |
| 6  | -0.199542000 | -0.308676000 | 2.672555000  | 6  | -3.183644000 | -2.906368000 | 0.990053000  |
| 6  | -1.443785000 | -0.930958000 | 2.592760000  | 6  | -2.137208000 | -2.002739000 | 0.874232000  |
| 6  | -2.545297000 | -0.162152000 | 2.116556000  | 6  | 1.143670000  | 0.439362000  | 1.585025000  |
| 8  | -2.534137000 | 1.051120000  | 1.891424000  | 6  | 2.265600000  | 0.100521000  | 2.324622000  |
| 8  | -3.667048000 | -0.895568000 | 1.892693000  | 6  | 2.861872000  | -1.128050000 | 2.092089000  |
| 6  | -4.780120000 | -0.203215000 | 1.337149000  | 6  | 2.373862000  | -2.035926000 | 1.173131000  |
| 6  | -5.815654000 | -1.234760000 | 0.960890000  | 6  | 1.250076000  | -1.681810000 | 0.437413000  |
| 1  | 0.639331000  | -0.847254000 | 3.099982000  | 6  | -2.614683000 | 1.747143000  | 0.519039000  |
| 1  | -0.178722000 | 0.761325000  | 2.854955000  | 6  | -3.090247000 | 3.018502000  | 0.806483000  |
| 1  | -4.452919000 | 0.368003000  | 0.465217000  | 6  | -2.277564000 | 4.103025000  | 0.530305000  |
| 1  | -5.171662000 | 0.508295000  | 2.068318000  | 6  | -1.016913000 | 3.974016000  | -0.024553000 |
| 1  | -5.405517000 | -1.940738000 | 0.236176000  | 6  | -0.556457000 | 2.699545000  | -0.319873000 |
| 1  | -6.144123000 | -1.793549000 | 1.837907000  | 1  | -2.814023000 | -0.768398000 | -2.216681000 |
| 1  | -6.685702000 | -0.748824000 | 0.517586000  | 1  | -4.705450000 | -2.375172000 | -2.002699000 |
| 1  | -1.546877000 | -2.006284000 | 2.639040000  | 1  | -3.310760000 | -3.519417000 | 1.871917000  |
| 8  | 5.507751000  | -3.252147000 | -0.636712000 | 1  | -1.427760000 | -1.902508000 | 1.686043000  |
| 6  | 6.528088000  | -3.402099000 | 0.333330000  | 1  | 0.676962000  | 1.043424000  | 1.742559000  |
| 1  | 6.946818000  | -2.433807000 | 0.616585000  | 1  | 2.683016000  | 0.771097000  | 3.063354000  |
| 6  | 6.152227000  | -3.909639000 | 1.224400000  | 1  | 2.872191000  | -2.985404000 | 1.031912000  |
| 1  | 7.303622000  | -4.008721000 | -0.125821000 | 1  | 0.847922000  | -2.377470000 | -0.289730000 |
| 8  | -4.101473000 | -2.168548000 | -2.227109000 | 1  | -3.235793000 | 0.886397000  | 0.733944000  |
| 6  | -5.043274000 | -1.298203000 | -2.824490000 | 1  | -4.068666000 | 3.174638000  | 1.240165000  |

|    |              |              |              |    |               |              |              |
|----|--------------|--------------|--------------|----|---------------|--------------|--------------|
| 1  | -0.422843000 | 4.854965000  | -0.226249000 | 6  | 4.336497000   | 0.885383000  | -2.169017000 |
| 6  | 0.425417000  | 2.562341000  | -0.763012000 | 6  | 5.098879000   | 1.517162000  | -1.011268000 |
| 6  | 0.312340000  | -0.085970000 | -2.525864000 | 6  | 4.801312000   | 0.781919000  | 0.289533000  |
| 6  | 1.609549000  | -0.587783000 | -2.414293000 | 6  | 3.303595000   | 0.778762000  | 0.580360000  |
| 6  | 2.586835000  | 0.247307000  | -1.801698000 | 6  | 0.163458000   | 2.574854000  | 0.321172000  |
| 8  | 2.401448000  | 1.412395000  | -1.438183000 | 6  | -0.209445000  | 3.624042000  | 1.361307000  |
| 8  | 3.784129000  | -0.359053000 | -1.601405000 | 6  | -1.546321000  | 3.278242000  | 2.004886000  |
| 6  | 4.752219000  | 0.377568000  | -0.859105000 | 6  | -1.492852000  | 1.890287000  | 2.630452000  |
| 6  | 5.862881000  | -0.573359000 | -0.487135000 | 6  | -1.115226000  | 0.831921000  | 1.598235000  |
| 1  | -0.440337000 | -0.673702000 | -3.041342000 | 1  | -0.049143000  | -0.660255000 | -2.775385000 |
| 1  | 0.196921000  | 0.986885000  | -2.650695000 | 1  | -0.727880000  | 0.982094000  | -2.381504000 |
| 1  | 4.278908000  | 0.801506000  | 0.029095000  | 1  | -2.130674000  | -1.721451000 | -1.836810000 |
| 1  | 5.122345000  | 1.208814000  | -1.463968000 | 1  | -5.577900000  | 0.955518000  | -1.461021000 |
| 1  | 6.632033000  | -0.047127000 | 0.078664000  | 1  | -5.015615000  | 0.864296000  | 0.205344000  |
| 1  | 5.477517000  | -1.387166000 | 0.130311000  | 1  | -6.685185000  | -1.281789000 | -1.214648000 |
| 1  | 6.323244000  | -1.002611000 | -1.377633000 | 1  | -7.294020000  | -0.137164000 | -0.012029000 |
| 1  | 1.832122000  | -1.636044000 | -2.555402000 | 1  | -6.120627000  | -1.372946000 | 0.460626000  |
| 9  | -5.097678000 | -3.880377000 | 0.052390000  | 1  | -0.644912000  | -1.701922000 | -0.574197000 |
| 9  | -2.734806000 | 5.334750000  | 0.808368000  | 1  | 2.891587000   | -0.899861000 | -0.679799000 |
| 9  | 3.962748000  | -1.449166000 | 2.793549000  | 1  | 0.994186000   | 1.731075000  | 1.731075000  |
|    |              | 1_TS_Ppfp3_3 |              | 1  | 0.209304000   | -2.616735000 | -1.561903000 |
| 15 | -0.626959000 | -0.007178000 | -0.494547000 | 1  | 1.814370000   | -2.788779000 | -0.852386000 |
| 6  | 0.602035000  | -0.603950000 | 0.651140000  | 1  | -0.723274000  | -4.156500000 | -0.139235000 |
| 6  | -1.110044000 | 1.642399000  | 0.011484000  | 1  | 0.578516000   | -4.938229000 | -0.751662000 |
| 6  | -2.071749000 | -1.058935000 | -0.329090000 | 1  | 0.793158000   | -5.358900000 | 1.698515000  |
| 6  | -0.195574000 | 2.674337000  | -0.233564000 | 1  | 2.162157000   | -4.434366000 | 1.091980000  |
| 6  | -0.503147000 | 3.982023000  | 0.111115000  | 1  | -0.271128000  | -3.263427000 | 2.512326000  |
| 6  | -1.737998000 | 4.236555000  | 0.680362000  | 1  | 1.335031000   | -3.445923000 | -3.211337000 |
| 6  | -2.670126000 | 3.244448000  | 0.924458000  | 1  | 2.263232000   | -1.918211000 | 1.474925000  |
| 6  | -2.347379000 | 1.937656000  | 0.587141000  | 1  | 0.997366000   | -1.116999000 | 2.402814000  |
| 6  | -2.267461000 | -1.936176000 | 0.738774000  | 1  | 2.298440000   | -0.393597000 | -2.712330000 |
| 6  | -3.407876000 | -2.725023000 | 0.801475000  | 1  | 2.467389000   | 1.895405000  | -1.813018000 |
| 6  | -4.342635000 | -2.612497000 | -0.211099000 | 1  | 4.684064000   | -0.145347000 | -2.305270000 |
| 6  | -4.185562000 | -1.752774000 | -1.283820000 | 1  | 4.537827000   | 1.418226000  | -3.100626000 |
| 6  | -3.035309000 | -0.981054000 | -1.340012000 | 1  | 6.171767000   | 1.517639000  | -1.214181000 |
| 6  | 1.058271000  | 0.129641000  | 1.748519000  | 1  | 4.790050000   | 2.563927000  | -0.907847000 |
| 6  | 2.054765000  | -0.377930000 | 2.568266000  | 1  | 5.151868000   | -0.253339000 | 0.205989000  |
| 6  | 2.589717000  | -1.617485000 | 2.263578000  | 1  | 5.341737000   | 1.238517000  | 1.121514000  |
| 6  | 2.167166000  | -2.372865000 | 1.186654000  | 1  | 2.965509000   | 1.814304000  | 0.703400000  |
| 6  | 1.168652000  | -1.853464000 | 0.373767000  | 1  | 3.096369000   | 0.259904000  | 1.519011000  |
| 1  | 0.762855000  | 2.440757000  | -0.688133000 | 1  | 1.117038000   | 2.822840000  | -0.154618000 |
| 1  | 0.189501000  | 4.794301000  | -0.062309000 | 1  | -0.599623000  | 2.561328000  | -0.466502000 |
| 1  | -3.621395000 | 3.497144000  | 1.372777000  | 1  | 0.566817000   | 3.657628000  | 2.134930000  |
| 1  | -3.063679000 | 1.148215000  | 0.777594000  | 1  | -0.247960000  | 4.612756000  | 0.899544000  |
| 1  | -1.529506000 | -2.005608000 | 1.528090000  | 1  | -1.817446000  | 4.024995000  | 2.754166000  |
| 1  | -3.578546000 | -3.412479000 | 1.618742000  | 1  | -2.326137000  | 3.292720000  | 1.234692000  |
| 1  | -4.944018000 | -1.703995000 | -2.053174000 | 1  | -0.744443000  | 1.887580000  | 3.431941000  |
| 1  | -2.886205000 | -0.306210000 | -2.175920000 | 1  | -2.452359000  | 1.636967000  | 3.086514000  |
| 1  | 0.632742000  | 1.100249000  | 1.970006000  | 1  | -1.888494000  | 0.787702000  | 0.824534000  |
| 1  | 2.420210000  | 0.171218000  | 3.425318000  | 1  | -1.070514000  | -0.149051000 | 2.076127000  |
| 1  | 2.617209000  | -3.336782000 | 0.991769000  |    |               | 1_TS_Pcy3_2  |              |
| 1  | 0.811517000  | -2.434146000 | -0.468108000 | 6  | 0.824943000   | 0.832376000  | -1.865029000 |
| 6  | 0.331511000  | -0.075898000 | -2.552889000 | 6  | 2.024494000   | 1.195692000  | -1.258400000 |
| 6  | 1.590374000  | -0.672514000 | -2.527138000 | 6  | 3.135687000   | 0.301323000  | -1.235919000 |
| 8  | 2.675262000  | 0.075849000  | -1.989115000 | 8  | 3.219254000   | -0.794807000 | -1.790323000 |
| 8  | 2.597710000  | 1.224956000  | -1.545353000 | 8  | 4.182623000   | 0.794802000  | -0.512580000 |
| 8  | 3.857595000  | -0.593965000 | -1.997116000 | 6  | 5.367844000   | 0.004366000  | -0.475907000 |
| 6  | 4.979294000  | 0.073378000  | -1.421865000 | 6  | 6.217785000   | 0.226745000  | -1.707659000 |
| 6  | 4.985274000  | -0.065689000 | 0.084205000  | 15 | -0.673622000  | 0.008445000  | -0.285525000 |
| 1  | -0.483569000 | -0.586017000 | -3.055949000 | 6  | 0.465918000   | -0.438360000 | 1.051953000  |
| 1  | 0.291107000  | 1.006810000  | -2.629649000 | 6  | -1.616043000  | 1.453606000  | 0.313303000  |
| 1  | 4.965491000  | 1.123095000  | -1.715613000 | 6  | -1.856130000  | -1.385968000 | -0.472649000 |
| 1  | 5.854884000  | -0.402145000 | -1.862411000 | 6  | -0.086467000  | -0.523455000 | 2.472793000  |
| 1  | 5.859406000  | 0.433638000  | 0.505170000  | 6  | 1.071412000   | -0.693592000 | 3.454441000  |
| 1  | 4.088184000  | 0.388422000  | 0.506635000  | 6  | 1.906551000   | -1.924703000 | 3.116216000  |
| 1  | 5.017064000  | -1.117621000 | 0.373201000  | 6  | 2.401443000   | -1.882085000 | 1.673775000  |
| 1  | 1.733006000  | -1.722159000 | -2.742081000 | 6  | 1.226215000   | -1.723612000 | 0.715878000  |
| 9  | -2.047427000 | 5.502014000  | 1.006609000  | 6  | -0.673242000  | 2.582796000  | 0.741579000  |
| 9  | 3.568828000  | -2.103251000 | 3.044931000  | 6  | -1.469636000  | 3.773131000  | 1.265363000  |
| 9  | -5.447964000 | -3.371779000 | -0.152881000 | 6  | -2.443091000  | 4.281613000  | 0.209662000  |
|    |              | 1_TS_Pcy3_1  |              | 6  | -3.372376000  | 3.163721000  | -0.244985000 |
| 6  | -0.764886000 | -0.085835000 | -2.201295000 | 6  | -2.575632000  | 1.971195000  | -0.763209000 |
| 6  | -1.984483000 | -0.648981000 | -1.855762000 | 6  | -3.063023000  | -1.347705000 | 0.467896000  |
| 6  | -3.057308000 | 0.190181000  | -1.426514000 | 6  | -3.904135000  | -2.610059000 | 0.303114000  |
| 8  | -3.046073000 | 1.418884000  | -1.353074000 | 6  | -4.362330000  | -2.767100000 | -1.141545000 |
| 8  | -4.172273000 | -0.508137000 | -1.083989000 | 6  | -3.165060000  | -2.804408000 | -2.083132000 |
| 6  | -5.293825000 | 0.264896000  | -0.664491000 | 6  | -2.5308834000 | -1.927297000 | -1.927297000 |
| 6  | -6.414048000 | -0.691681000 | -0.338683000 | 1  | 0.124671000   | 1.603963000  | -2.161794000 |
| 15 | 0.714249000  | -0.024215000 | -0.345454000 | 1  | 0.834263000   | -0.030513000 | -2.521536000 |
| 6  | 0.437036000  | -1.671467000 | 0.378176000  | 1  | 2.120469000   | -2.127913000 | -0.716860000 |
| 6  | 2.535275000  | 0.134495000  | -0.574715000 | 1  | 5.098881000   | -1.047806000 | -0.372826000 |
| 6  | 0.226560000  | 1.177132000  | 0.946547000  | 1  | 5.896706000   | 0.319752000  | 0.423225000  |
| 6  | 0.742087000  | -2.787899000 | -0.623563000 | 1  | 6.481660000   | 0.280692000  | -1.804877000 |
| 6  | 0.358549000  | -4.143010000 | -0.036423000 | 1  | 5.678655000   | -0.084809000 | -2.601944000 |
| 6  | 1.082988000  | -4.392527000 | 1.280944000  | 1  | 7.139310000   | -0.353227000 | -1.638991000 |
| 6  | 0.799093000  | -3.273393000 | 2.275596000  | 1  | 1.205980000   | 0.376640000  | 1.021877000  |
| 6  | 1.186454000  | -1.921031000 | 1.686312000  | 1  | -2.205522000  | 1.145378000  | 1.187317000  |
| 6  | 2.838711000  | 0.865856000  | -1.887604000 | 1  | -1.259612000  | -2.271703000 | -0.217515000 |

|    |              |               |              |    |              |               |              |
|----|--------------|---------------|--------------|----|--------------|---------------|--------------|
| 1  | -0.673906000 | 0.362811000   | 2.726536000  | 1  | -2.844612000 | 1.969902000   | 0.396787000  |
| 1  | -0.753741000 | -1.390156000  | 2.545262000  | 1  | -1.420260000 | 2.690040000   | 1.140056000  |
| 1  | 1.706886000  | 0.198083000   | 3.401279000  | 1  | -2.631282000 | 3.492977000   | -1.546724000 |
| 1  | 0.694501000  | -0.759481000  | 4.477419000  | 1  | -2.779974000 | 4.403740000   | -0.047637000 |
| 1  | 2.746691000  | -2.013606000  | 3.808178000  | 1  | -0.970771000 | 5.340520000   | -1.495850000 |
| 1  | 1.287023000  | -2.819613000  | 3.247800000  | 1  | -0.317031000 | 4.720473000   | 0.016679000  |
| 1  | 3.080437000  | -1.030247000  | 1.541225000  | 1  | -0.328595000 | 3.231623000   | -2.645413000 |
| 1  | 2.967685000  | -2.785450000  | 1.436214000  | 1  | 1.080812000  | 3.969603000   | -1.891121000 |
| 1  | 0.554539000  | -2.581247000  | 0.837100000  | 1  | 0.860314000  | 2.438631000   | 0.058101000  |
| 1  | 1.567043000  | -1.710248000  | -0.321716000 | 1  | 1.040563000  | 1.541277000   | -1.432550000 |
| 1  | 0.031503000  | 2.235966000   | 1.501031000  |    |              | 1_TS_PBu3_1   |              |
| 1  | -0.082294000 | 2.899535000   | -0.125928000 | 6  | -0.059291000 | -0.481346000  | 1.602698000  |
| 1  | -2.031206000 | 3.461365000   | 2.153628000  | 6  | 0.992510000  | -1.322685000  | 1.274439000  |
| 1  | -0.790097000 | 4.568844000   | 1.577047000  | 15 | -0.966927000 | 0.227168000   | -0.411298000 |
| 1  | -3.018850000 | 5.126059000   | 0.593813000  | 6  | 2.307445000  | -0.784004000  | 1.099432000  |
| 1  | -1.874051000 | 4.645336000   | -0.653686000 | 8  | 2.644287000  | 0.389546000   | 1.243179000  |
| 1  | -3.986206000 | 2.837946000   | 0.602797000  | 8  | 3.219580000  | -1.726338000  | 0.746326000  |
| 1  | -4.055585000 | 3.521423000   | -1.017929000 | 6  | 4.557080000  | -1.269075000  | 0.560422000  |
| 1  | -1.991301000 | 2.279325000   | -1.639032000 | 6  | 5.399883000  | -2.460617000  | 0.178779000  |
| 1  | -3.252624000 | 1.181212000   | -1.093727000 | 6  | 0.462113000  | 0.864992000   | -1.319775000 |
| 1  | -2.740594000 | -1.231663000  | 1.504850000  | 6  | -1.300581000 | -1.359838000  | -1.220231000 |
| 1  | -3.683442000 | -0.477842000  | 0.226300000  | 6  | -2.356923000 | 1.302434000   | -0.935080000 |
| 1  | -3.302388000 | -3.481206000  | 0.586303000  | 6  | -2.373725000 | -2.163553000  | -0.494329000 |
| 1  | -4.762274000 | -2.577984000  | 0.977872000  | 6  | 0.825884000  | 2.291351000   | -0.925179000 |
| 1  | -4.966005000 | -3.669780000  | -1.255463000 | 6  | -2.742181000 | 2.322266000   | 0.134861000  |
| 1  | -5.001260000 | -1.916709000  | -1.407417000 | 6  | 2.123960000  | 2.751464000   | -1.574180000 |
| 1  | -2.552845000 | -3.682598000  | -1.847695000 | 6  | 2.486028000  | 4.176581000   | -1.186688000 |
| 1  | -3.492459000 | -2.909205000  | -3.119522000 | 6  | -3.388946000 | 1.668078000   | 1.348502000  |
| 1  | -2.891972000 | -0.674862000  | -2.229056000 | 6  | -3.752436000 | 2.679587000   | 2.424014000  |
| 1  | -1.437122000 | -1.598001000  | -2.584938000 | 6  | -2.763589000 | -3.429039000  | -1.246173000 |
|    |              | 1_TS_Pcy3_3   |              | 6  | -3.813093000 | -4.239153000  | -0.501391000 |
| 6  | 0.516599000  | 0.384151000   | 2.341777000  | 1  | -0.986923000 | -0.894894000  | 1.977066000  |
| 6  | 1.778170000  | -0.206080000  | 2.318587000  | 1  | 0.174132000  | 0.508983000   | 1.976586000  |
| 6  | 2.870333000  | 0.449661000   | 1.682182000  | 1  | 0.836606000  | -2.375189000  | 1.076248000  |
| 8  | 2.874598000  | 1.585699000   | 1.206669000  | 1  | 4.572185000  | -0.503649000  | -0.218927000 |
| 8  | 3.995358000  | -0.323962000  | 1.636375000  | 1  | 4.914295000  | -0.806022000  | 1.482193000  |
| 6  | 5.093405000  | 0.198085000   | 0.893813000  | 1  | 5.379602000  | -3.215649000  | 0.965222000  |
| 6  | 4.896151000  | -0.0221153000 | -0.591284000 | 1  | 5.035551000  | -2.912132000  | -0.744501000 |
| 15 | -0.689205000 | -0.022941000  | 0.379054000  | 1  | 6.433979000  | -2.151369000  | 0.025620000  |
| 6  | 0.513914000  | -1.015093000  | -0.549575000 | 1  | 1.298737000  | 0.191369000   | -1.107489000 |
| 6  | -2.266844000 | -0.963253000  | 0.407393000  | 1  | 0.254955000  | 0.796112000   | -2.393385000 |
| 6  | -0.965303000 | 1.499858000   | -0.590183000 | 1  | -0.359028000 | -1.917297000  | -1.245251000 |
| 6  | 0.653487000  | -2.419492000  | 0.044904000  | 1  | -1.588882000 | -1.168680000  | -2.259356000 |
| 6  | 1.910320000  | -3.079722000  | -0.509894000 | 1  | -2.069916000 | -1.789351000  | -1.872187000 |
| 6  | 1.837793000  | -3.159909000  | -2.031845000 | 1  | -3.212548000 | 0.655797000   | -1.153376000 |
| 6  | 1.589422000  | -1.789924000  | -2.655629000 | 1  | -2.010618000 | -2.4010618000 | -0.503414000 |
| 6  | 0.345334000  | -1.130645000  | -2.063936000 | 1  | -3.266496000 | -1.544622000  | -0.340937000 |
| 6  | -3.053365000 | -0.710601000  | 1.698558000  | 1  | 0.015048000  | 2.973960000   | -1.204318000 |
| 6  | -4.280252000 | -1.613331000  | 1.765017000  | 1  | 0.932512000  | 2.348367000   | 0.163494000  |
| 6  | -5.167517000 | -1.418413000  | 0.541748000  | 1  | -1.853817000 | 2.878940000   | 0.454721000  |
| 6  | -4.382201000 | -1.681322000  | -0.737181000 | 1  | -3.434278000 | 3.055427000   | -0.289716000 |
| 6  | -3.162229000 | -0.768675000  | -0.818595000 | 1  | 2.923030000  | 2.066815000   | -1.272931000 |
| 6  | -1.889547000 | 2.451365000   | 0.176790000  | 1  | 2.032240000  | 2.668712000   | -2.661745000 |
| 6  | -2.120530000 | 3.737894000   | -0.608109000 | 1  | 2.604442000  | 4.262936000   | -0.104320000 |
| 6  | -0.799456000 | 4.426980000   | -0.922681000 | 1  | 3.418714000  | 4.498377000   | -1.651767000 |
| 6  | 0.126107000  | 3.483579000   | -1.679996000 | 1  | 1.702048000  | 4.873887000   | -1.491216000 |
| 6  | 0.361759000  | 2.202450000   | -0.887428000 | 1  | -4.283091000 | 1.125961000   | 1.023575000  |
| 1  | -0.242486000 | -0.010670000  | 3.004999000  | 1  | -2.705089000 | 0.916401000   | 1.759612000  |
| 1  | 0.459544000  | 1.458688000   | 2.197109000  | 1  | -4.447780000 | 3.426652000   | 2.034623000  |
| 1  | 1.929935000  | -1.223976000  | 2.651250000  | 1  | -4.221210000 | 2.203281000   | 3.285846000  |
| 1  | 5.970232000  | -0.339032000  | 1.253956000  | 1  | -2.862870000 | 3.207015000   | 2.775226000  |
| 1  | 5.215288000  | 1.257998000   | 1.117331000  | 1  | -1.867579000 | -4.035543000  | -1.408709000 |
| 1  | 3.994043000  | 0.491156000   | -0.930894000 | 1  | -3.135903000 | -3.153937000  | -2.237508000 |
| 1  | 4.803507000  | -1.085756000  | -0.813670000 | 1  | -4.089933000 | -5.141778000  | -1.047401000 |
| 1  | 5.746861000  | 0.373116000   | -1.149212000 | 1  | -3.443988000 | -4.542086000  | 0.480937000  |
| 1  | 1.463610000  | -0.491421000  | -0.349372000 | 1  | -4.720001000 | -3.650186000  | -0.346644000 |
| 1  | -1.950455000 | -2.014102000  | 0.428220000  |    |              | 1_TS_PBu3_2   |              |
| 1  | -1.443010000 | 1.230207000   | -1.541912000 | 6  | 0.031446000  | 0.532890000   | 1.522302000  |
| 1  | 0.673347000  | -2.383458000  | 1.136605000  | 6  | -0.972810000 | 1.386157000   | 1.089284000  |
| 1  | -0.217742000 | -3.016419000  | -0.247299000 | 15 | 0.979540000  | -0.346459000  | -0.395101000 |
| 1  | 2.779603000  | -2.481870000  | -0.209765000 | 6  | -2.299926000 | 0.880773000   | 0.910191000  |
| 1  | 2.039418000  | -4.076571000  | -0.083279000 | 8  | -2.686362000 | -0.257360000  | 1.167225000  |
| 1  | 2.752831000  | -3.599040000  | -2.435081000 | 8  | -3.151944000 | 1.812532000   | 0.403974000  |
| 1  | 1.013561000  | -3.827822000  | -2.308298000 | 6  | -4.514721000 | 1.420170000   | 0.245472000  |
| 1  | 2.452048000  | -1.141262000  | -2.459714000 | 6  | -5.272715000 | 1.522150000   | 1.550315000  |
| 1  | 1.493719000  | -1.878887000  | -3.739886000 | 6  | -0.422268000 | -0.931772000  | -1.380698000 |
| 1  | -0.532450000 | -1.751480000  | -2.277029000 | 6  | 1.456735000  | 1.179290000   | -1.250175000 |
| 1  | 0.173097000  | -0.156465000  | -2.526486000 | 6  | 2.337342000  | -1.517788000  | -0.781645000 |
| 1  | -2.409581000 | -0.877138000  | 2.565471000  | 6  | 2.546193000  | 1.949061000   | -0.511925000 |
| 1  | -3.372679000 | 0.336713000   | 1.733852000  | 6  | -0.885292000 | -2.332727000  | -0.995105000 |
| 1  | -3.949304000 | -2.657670000  | 1.802997000  | 6  | 2.641530000  | -2.463144000  | 0.378621000  |
| 1  | -4.839767000 | -1.419636000  | 2.682440000  | 6  | -1.984129000 | -2.863126000  | -1.913574000 |
| 1  | -6.041155000 | -2.071164000  | 0.595203000  | 6  | -3.261640000 | -2.035761000  | -1.863042000 |
| 1  | -5.536834000 | -0.386238000  | 0.527710000  | 6  | 3.274486000  | -1.739226000  | 1.559399000  |
| 1  | -4.049782000 | -2.725662000  | -0.746592000 | 6  | 3.549116000  | -2.671556000  | 1.529685000  |
| 1  | -5.015981000 | -1.536982000  | -1.614739000 | 6  | 3.058236000  | 3.142410000   | -1.307446000 |
| 1  | -3.502441000 | 0.272153000   | -0.855717000 | 6  | 4.124206000  | 3.920439000   | -0.551863000 |
| 1  | -2.601017000 | -0.954333000  | -1.737292000 | 1  | 0.962969000  | 0.937899000   | 1.896991000  |

|    |              |              |              |    |               |              |              |
|----|--------------|--------------|--------------|----|---------------|--------------|--------------|
| 1  | -0.257874000 | -0.411521000 | 1.968209000  | 1  | 1.341873000   | 5.653880000  | 0.649349000  |
| 1  | -0.765586000 | 2.408243000  | 0.800221000  | 1  | 2.916332000   | 5.314656000  | -0.068134000 |
| 1  | -4.924883000 | 2.103453000  | -0.497314000 |    |               | 2_TS_PMe3_1  |              |
| 1  | -4.554350000 | 0.405075000  | -0.152295000 | 6  | -1.670044000  | 2.603444000  | 0.284075000  |
| 1  | -6.321360000 | 1.263970000  | 1.396031000  | 6  | -0.762353000  | 1.738578000  | -0.108436000 |
| 1  | -4.853262000 | 0.839427000  | 2.288685000  | 6  | 0.482571000   | 1.449867000  | -0.556996000 |
| 1  | -5.223480000 | 2.538910000  | 1.942175000  | 15 | -1.976968000  | -0.421095000 | -0.034711000 |
| 1  | -1.224890000 | -0.201100000 | -1.242965000 | 6  | 1.327103000   | 0.593207000  | 0.231444000  |
| 1  | -0.131710000 | -0.897471000 | -2.437596000 | 8  | 1.021621000   | 0.098428000  | 1.310443000  |
| 1  | 0.555890000  | 1.793023000  | -1.348151000 | 8  | 2.514720000   | 0.336709000  | -0.354728000 |
| 1  | 1.780215000  | 0.919359000  | -2.263811000 | 6  | 3.393608000   | -0.535149000 | 0.359551000  |
| 1  | 2.059880000  | -2.066662000 | -1.686675000 | 6  | 4.656464000   | -0.676517000 | -0.451960000 |
| 1  | 3.227675000  | -0.927588000 | -1.019845000 | 6  | -0.973840000  | -1.433799000 | -1.142983000 |
| 1  | 2.155648000  | 2.298151000  | 0.449765000  | 6  | -2.164072000  | -1.483518000 | 1.420534000  |
| 1  | 3.386455000  | 1.282543000  | -0.280422000 | 6  | -3.622034000  | -0.508591000 | -0.793899000 |
| 1  | -0.032830000 | -3.019074000 | -1.024368000 | 1  | -2.709514000  | 2.349436000  | 0.435023000  |
| 1  | -1.249200000 | -2.311772000 | 0.037105000  | 1  | -1.362043000  | 3.628203000  | 0.469603000  |
| 1  | 1.719196000  | -2.955060000 | 0.708606000  | 1  | 3.594238000   | -0.112810000 | 1.345591000  |
| 1  | 3.314876000  | -3.256009000 | 0.039792000  | 1  | 2.900393000   | -1.498243000 | 0.505900000  |
| 1  | -1.604321000 | -8.96223000  | -2.939833000 | 1  | 5.354298000   | -1.337812000 | 0.061698000  |
| 1  | -2.210452000 | -3.894461000 | -1.632061000 | 1  | 4.440407000   | -1.099500000 | -1.433353000 |
| 1  | -4.043129000 | -2.479656000 | -2.481608000 | 1  | 5.137820000   | 0.292020000  | -0.589133000 |
| 1  | -3.632447000 | -1.965393000 | -0.838457000 | 1  | 0.773278000   | 1.687813000  | -1.572439000 |
| 1  | -3.096542000 | -1.017624000 | -2.222575000 | 1  | -3.610151000  | 0.003580000  | -1.756941000 |
| 1  | 4.204841000  | -1.267001000 | 1.227104000  | 1  | -3.936746000  | -1.544655000 | -0.943939000 |
| 1  | 2.613093000  | -0.925367000 | 1.879239000  | 1  | -4.349864000  | -0.009985000 | -0.151838000 |
| 1  | 4.010850000  | -2.146345000 | 3.565515000  | 1  | -1.445065000  | -2.403451000 | -1.317082000 |
| 1  | 2.622513000  | -3.124766000 | 3.087626000  | 1  | -0.846043000  | -0.922342000 | -2.098452000 |
| 1  | 4.219251000  | -3.480942000 | 2.430276000  | 1  | 0.012671000   | -1.596616000 | -0.705860000 |
| 1  | 2.215221000  | 3.797342000  | -1.547206000 | 1  | -1.188020000  | -1.626079000 | 1.884549000  |
| 1  | 3.457954000  | 2.789086000  | -2.262650000 | 1  | -2.584338000  | -2.454851000 | 1.146916000  |
| 1  | 4.980144000  | 3.282032000  | -0.321313000 | 1  | -2.821954000  | -1.004493000 | 2.146726000  |
| 1  | 4.487941000  | 4.772171000  | -1.127815000 |    |               | 2_TS_PMe3_2  |              |
| 1  | 3.730339000  | 4.299424000  | 0.393771000  | 6  | -1.365385000  | 2.616811000  | 0.538626000  |
|    |              | 1_TS_PBu3_3  |              | 6  | -0.602472000  | 1.718441000  | -0.041669000 |
| 6  | -0.357669000 | 0.650216000  | 1.762795000  | 6  | 0.538331000   | 1.370980000  | -0.683832000 |
| 6  | -1.598840000 | 1.063503000  | 1.297674000  | 15 | -1.986125000  | -0.337674000 | 0.044201000  |
| 15 | 0.922584000  | 0.269566000  | -0.116312000 | 6  | 1.402445000   | 0.385696000  | -0.091228000 |
| 6  | -2.618152000 | 0.093475000  | 1.039664000  | 8  | -0.179475000  | -0.177465000 | 0.978302000  |
| 8  | -2.535516000 | -1.121209000 | 1.213858000  | 8  | 2.469631000   | 0.092799000  | -0.865193000 |
| 8  | -3.764499000 | 0.645984000  | 0.563730000  | 6  | 3.397070000   | -0.865835000 | -0.348581000 |
| 6  | -4.833074000 | -0.258055000 | 0.293577000  | 6  | 4.351809000   | -0.227460000 | 0.634550000  |
| 6  | -5.999514000 | 0.550728000  | -0.217398000 | 6  | -1.2229331000 | -1.334323000 | -1.257416000 |
| 6  | -0.093694000 | -0.849728000 | -1.111212000 | 6  | -2.073648000  | -1.491851000 | 1.437796000  |
| 6  | 0.734543000  | 1.842477000  | -0.997623000 | 6  | -3.718126000  | -0.239656000 | -0.485781000 |
| 6  | 2.647736000  | -0.234683000 | -0.459692000 | 1  | -2.393847000  | 2.436421000  | 0.816881000  |
| 6  | 1.350631000  | 3.021726000  | -0.254773000 | 1  | -0.941620000  | 3.593393000  | 0.753508000  |
| 6  | 0.034097000  | -2.314694000 | -0.713834000 | 1  | 2.845596000   | -1.684929000 | 0.113323000  |
| 6  | 3.233169000  | -1.147712000 | 0.613928000  | 1  | 3.927351000   | -1.245860000 | -1.220264000 |
| 6  | -0.968252000 | -3.193285000 | -1.449731000 | 1  | 5.077747000   | -0.964237000 | 0.980613000  |
| 6  | -0.838159000 | -4.658902000 | -1.066023000 | 1  | 4.893238000   | 0.593522000  | 0.163288000  |
| 6  | 4.638564000  | -1.619556000 | 0.268414000  | 1  | 3.811109000   | 1.566490000  | 1.499069000  |
| 6  | 5.229264000  | -2.506913000 | 1.353186000  | 1  | 0.709006000   | 1.673415000  | -1.709356000 |
| 6  | 1.265915000  | 4.317015000  | -1.051129000 | 1  | -3.788194000  | 0.337623000  | -1.408647000 |
| 6  | 1.863467000  | 5.494626000  | -0.297004000 | 1  | -4.139775000  | -1.234233000 | -0.653210000 |
| 1  | 0.320963000  | 1.369316000  | 2.202054000  | 1  | -4.308114000  | 0.267563000  | 0.279226000  |
| 1  | -0.275175000 | -0.350617000 | 2.170175000  | 1  | -1.801249000  | -2.248514000 | -1.429943000 |
| 1  | -1.800027000 | 2.099986000  | 1.059951000  | 1  | -1.186717000  | -0.760315000 | -2.184572000 |
| 1  | -4.505327000 | -0.995435000 | -0.442884000 | 1  | -0.211050000  | -0.605406000 | -0.974091000 |
| 1  | -5.091453000 | -0.798620000 | 1.206199000  | 1  | -2.587586000  | -1.020725000 | 2.276598000  |
| 1  | -6.320012000 | 1.279429000  | 0.527772000  | 1  | -1.061993000  | -1.745185000 | 1.754877000  |
| 1  | -5.730525000 | 1.083812000  | -1.129854000 | 1  | -2.609035000  | -2.403566000 | 1.160027000  |
| 1  | -6.840205000 | -0.107114000 | -0.438688000 |    |               | 2_TS_PMe3_3  |              |
| 1  | -1.130047000 | -0.517238000 | -0.992731000 | 6  | -1.769371000  | 2.569526000  | 0.363344000  |
| 1  | 0.171571000  | -0.707021000 | -2.164753000 | 6  | -0.797527000  | 1.804199000  | -0.079107000 |
| 1  | -0.339024000 | 2.002923000  | -1.139051000 | 6  | 0.447302000   | 1.644461000  | -0.589884000 |
| 1  | 1.175467000  | 1.732825000  | -1.994240000 | 15 | -1.771994000  | -0.468255000 | 0.007765000  |
| 1  | 2.675433000  | -0.721328000 | -1.441890000 | 6  | 1.401217000   | 0.853878000  | 0.140174000  |
| 1  | 3.245168000  | 0.679047000  | -0.534932000 | 8  | 1.198085000   | 0.338617000  | 1.233558000  |
| 1  | 0.838105000  | 3.153427000  | 0.704372000  | 8  | 2.565804000   | 0.689693000  | -0.523388000 |
| 1  | 2.400139000  | 2.810500000  | -0.019513000 | 6  | 3.545006000   | -0.148628000 | 0.096805000  |
| 1  | 1.050415000  | -2.669203000 | -0.919761000 | 6  | 3.240793000   | -1.611792000 | -0.134761000 |
| 1  | -0.128385000 | -2.414299000 | 0.364913000  | 6  | -0.773288000  | -1.303313000 | -1.242983000 |
| 1  | 3.250497000  | -0.614118000 | 1.569825000  | 6  | -1.708251000  | -1.618304000 | 1.406607000  |
| 1  | 2.584444000  | -2.017667000 | 0.761827000  | 6  | -3.462064000  | -0.698182000 | -0.608628000 |
| 1  | -1.976592000 | -2.833990000 | -1.221378000 | 1  | -2.770098000  | 2.210135000  | 0.556572000  |
| 1  | -0.828195000 | -3.072687000 | -2.528595000 | 1  | -1.558657000  | 3.618784000  | 0.547703000  |
| 1  | -0.999926000 | -4.792233000 | 0.005915000  | 1  | 4.490520000   | 0.131949000  | -0.364237000 |
| 1  | -1.562223000 | -5.281415000 | -1.593232000 | 1  | 3.590632000   | 0.079534000  | 1.161648000  |
| 1  | 0.160351000  | -5.035483000 | -1.300031000 | 1  | 2.304401000   | -1.890716000 | -0.348876000 |
| 1  | 4.609102000  | -2.160159000 | -0.682616000 | 1  | 3.165398000   | -1.821939000 | -1.202623000 |
| 1  | 5.278592000  | -0.746382000 | 0.108195000  | 1  | 4.039450000   | -2.227804000 | 0.280529000  |
| 1  | 4.608861000  | -3.392050000 | 1.510213000  | 1  | 0.661945000   | 1.914633000  | -1.616231000 |
| 1  | 6.234536000  | -2.844036000 | 1.097614000  | 1  | -3.594736000  | -0.139608000 | -1.536132000 |
| 1  | 5.287035000  | -1.971295000 | 2.303355000  | 1  | -3.679103000  | -1.753568000 | -0.792698000 |
| 1  | 0.217446000  | 4.518276000  | -1.290558000 | 1  | -4.174223000  | -0.316017000 | 0.124465000  |
| 1  | 1.782000000  | 4.182808000  | -2.006507000 | 1  | -1.118799000  | -2.327305000 | -1.399608000 |
| 1  | 1.799953000  | 6.418384000  | -0.873318000 | 1  | -0.832669000  | -0.757272000 | -2.185892000 |

|    |              |               |              |    |              |               |              |
|----|--------------|---------------|--------------|----|--------------|---------------|--------------|
| 1  | 0.272570000  | -1.330057000  | -0.929864000 | 6  | -0.575858000 | -1.374985000  | 1.928754000  |
| 1  | -2.324102000 | -1.243392000  | 2.224924000  | 6  | -1.557182000 | 0.597521000   | 0.124272000  |
| 1  | -0.679176000 | -1.691666000  | 1.759128000  | 6  | -3.217802000 | -1.596239000  | 0.915518000  |
| 1  | -2.067449000 | -2.609140000  | 1.116195000  | 6  | -0.463572000 | 1.392688000   | 0.478999000  |
|    |              | 2_TS_PPhMe2_1 |              | 6  | -0.443739000 | 2.747339000   | 0.164673000  |
| 6  | -0.213758000 | 2.588449000   | -1.004836000 | 6  | -1.516251000 | 3.323893000   | -0.503263000 |
| 6  | 0.596514000  | 1.558144000   | -0.918866000 | 6  | -2.609964000 | 2.540386000   | -0.861317000 |
| 6  | 1.749512000  | 0.923941000   | -1.241390000 | 6  | -2.627711000 | 1.186784000   | -0.556550000 |
| 15 | -0.661722000 | 0.001494000   | 0.521078000  | 1  | -1.158553000 | -3.668935000  | -0.977484000 |
| 6  | 2.665337000  | 0.564648000   | -0.192082000 | 1  | 0.318834000  | -3.769863000  | -2.100207000 |
| 8  | 2.499303000  | 0.799110000   | 0.999990000  | 1  | 4.442915000  | -0.165896000  | 0.183673000  |
| 8  | 3.743637000  | -0.110182000  | -0.638142000 | 1  | 4.471917000  | 1.404682000   | -0.636760000 |
| 6  | 4.684089000  | -0.524270000  | 0.355645000  | 1  | 2.807986000  | 0.728189000   | 1.843907000  |
| 6  | 5.812194000  | -1.233208000  | -0.350066000 | 1  | 4.277379000  | 1.712735000   | 1.834421000  |
| 6  | -0.642359000 | 0.125376000   | 2.328141000  | 1  | 2.823375000  | 2.299060000   | 1.014537000  |
| 6  | -2.399253000 | -0.267242000  | 0.125406000  | 1  | -0.944176000 | -0.719831000  | 2.720735000  |
| 6  | 0.139923000  | -1.579548000  | 0.190053000  | 1  | -0.664565000 | -2.414460000  | 2.248731000  |
| 6  | -3.377251000 | 0.529286000   | 0.732279000  | 1  | 0.479176000  | -1.177536000  | -1.739837000 |
| 6  | -4.714098000 | 0.398265000   | 0.380627000  | 1  | -3.551933000 | -0.970806000  | 1.745798000  |
| 6  | -5.095339000 | -0.524484000  | -0.588004000 | 1  | -3.928840000 | -1.492265000  | 0.080047000  |
| 6  | -4.130537000 | -1.314637000  | -1.202710000 | 1  | -3.225398000 | -2.641181000  | 1.229062000  |
| 6  | -2.792290000 | -1.186730000  | -0.851538000 | 1  | 0.375335000  | 0.958833000   | 1.010817000  |
| 1  | 0.153317000  | 0.499991000   | -1.466881000 | 1  | 0.410329000  | 3.350551000   | 0.447050000  |
| 1  | -1.231843000 | 2.578167000   | -0.639587000 | 1  | -1.502970000 | 4.379124000   | -0.743909000 |
| 1  | 5.038127000  | 0.352084000   | 0.900978000  | 1  | -3.449165000 | 2.985206000   | -1.380688000 |
| 1  | 4.182960000  | -1.179704000  | 1.070834000  | 1  | -3.479415000 | 0.585541000   | -0.852198000 |
| 1  | 6.551224000  | -1.568300000  | 0.377684000  | 1  | 0.679851000  | -0.125973000  | -2.069586000 |
| 1  | 5.442961000  | -2.104440000  | -0.891634000 |    |              | 2_TS_PPh2Me_1 |              |
| 1  | 6.304296000  | -0.566331000  | -1.058343000 | 6  | 0.935248000  | 3.194713000   | -0.706077000 |
| 1  | -1.074095000 | 1.073180000   | 2.648608000  | 6  | -0.013592000 | 2.283104000   | -0.696947000 |
| 1  | -1.189533000 | -0.696608000  | 2.793642000  | 6  | -1.241014000 | 1.858612000   | -1.099983000 |
| 1  | 0.399350000  | 0.107168000   | 2.649250000  | 15 | 0.891951000  | 0.503506000   | 0.669284000  |
| 1  | 1.128751000  | -1.561664000  | 0.651201000  | 6  | -2.181837000 | 1.464632000   | -0.089923000 |
| 1  | -0.429225000 | -2.413729000  | 0.603155000  | 8  | -2.009960000 | 1.611873000   | 1.116986000  |
| 1  | 0.271263000  | -1.723790000  | -0.883202000 | 8  | -3.280821000 | 0.857416000   | -0.581382000 |
| 1  | -3.092581000 | 1.254501000   | 1.486270000  | 6  | -4.230820000 | 0.394773000   | 0.379887000  |
| 1  | -5.459357000 | 1.016971000   | 0.864317000  | 6  | -5.274249000 | -0.404134000  | -0.359080000 |
| 1  | -6.137528000 | -0.626786000  | -0.861558000 | 6  | -0.150802000 | -0.888873000  | 0.213842000  |
| 1  | -4.419866000 | -2.035831000  | -1.956609000 | 6  | 2.572618000  | 0.018625000   | 0.198805000  |
| 1  | -2.052232000 | -1.809616000  | -1.339350000 | 6  | 0.897163000  | 0.554384000   | 2.472414000  |
| 1  | 1.900201000  | 0.522962000   | -2.235692000 | 6  | 3.479891000  | -0.537410000  | 1.103865000  |
|    |              | 2_TS_PPhMe2_2 |              | 6  | 4.760765000  | -0.884349000  | 0.691805000  |
| 6  | 1.898876000  | -2.665705000  | -1.006922000 | 6  | 5.149889000  | -0.685141000  | -0.628023000 |
| 6  | 1.256460000  | -2.008677000  | -0.065575000 | 6  | 4.257352000  | -0.124851000  | -1.534952000 |
| 6  | 0.417605000  | -2.037181000  | 1.006751000  | 6  | 2.981936000  | 0.236081000   | -1.120390000 |
| 15 | 1.966344000  | 0.223397000   | -0.264532000 | 6  | -0.236669000 | -1.231213000  | -1.138723000 |
| 6  | -0.984952000 | -1.719714000  | 0.901680000  | 6  | -1.105820000 | -2.228190000  | -1.561873000 |
| 8  | -1.775313000 | -1.683737000  | 1.835296000  | 6  | -1.914974000 | -2.881845000  | -0.638856000 |
| 8  | -1.377231000 | -1.467315000  | -0.366073000 | 6  | -1.846589000 | -2.537914000  | 0.707359000  |
| 6  | -2.727113000 | -1.035080000  | -0.534316000 | 6  | -0.973580000 | -1.543672000  | 1.131961000  |
| 6  | -2.953173000 | -0.803182000  | -2.007232000 | 1  | 0.709194000  | 4.181334000   | -1.098516000 |
| 6  | 2.945390000  | 1.204658000   | -1.437938000 | 1  | 1.936578000  | 3.012061000   | -0.338910000 |
| 6  | 0.509268000  | 1.226042000   | 0.056122000  | 1  | -1.416842000 | 1.573343000   | -2.129261000 |
| 6  | 2.928126000  | 0.338021000   | 1.258378000  | 1  | -3.716373000 | -0.213630000  | 1.126119000  |
| 6  | -0.161377000 | 1.842115000   | -1.006518000 | 1  | -4.668370000 | 1.253499000   | 0.893607000  |
| 6  | -1.322313000 | 2.567378000   | -0.782260000 | 1  | -5.773363000 | 0.207949000   | -1.110716000 |
| 6  | -1.841130000 | 2.675807000   | 0.506052000  | 1  | -4.816825000 | -1.261278000  | -0.856322000 |
| 6  | -1.191990000 | 2.055372000   | 1.564912000  | 1  | -6.025220000 | -0.771507000  | 0.340480000  |
| 6  | -0.020133000 | 1.337634000   | 1.343528000  | 1  | -0.088347000 | 0.878745000   | 2.804020000  |
| 1  | 2.563967000  | -2.190578000  | -1.713982000 | 1  | 1.137364000  | -0.408103000  | 2.926385000  |
| 1  | 1.751124000  | -3.739041000  | -1.084344000 | 1  | 1.628625000  | 1.296400000   | 2.794801000  |
| 1  | -3.403368000 | -1.795935000  | -0.140893000 | 1  | 3.192030000  | -0.706566000  | 2.133731000  |
| 1  | -2.880066000 | -0.120876000  | 0.044202000  | 1  | 5.454552000  | -1.314059000  | 1.403137000  |
| 1  | -2.265340000 | -0.047331000  | -2.389013000 | 1  | 6.147884000  | -0.957946000  | -0.946215000 |
| 1  | -2.804730000 | -1.724501000  | -2.571359000 | 1  | 4.557725000  | 0.043917000   | -2.561067000 |
| 1  | -3.973171000 | -0.457057000  | -2.175832000 | 1  | 2.298624000  | 0.702657000   | -1.821654000 |
| 1  | 3.115397000  | 2.217481000   | -1.067404000 | 1  | 0.380072000  | -0.712512000  | -1.864694000 |
| 1  | 3.906357000  | 0.707620000   | -1.578999000 | 1  | -1.158959000 | -2.486565000  | -2.611652000 |
| 1  | 2.445905000  | 1.251444000   | -2.404771000 | 1  | -2.598401000 | -3.654521000  | -0.967330000 |
| 1  | 2.468731000  | -0.268544000  | 2.039539000  | 1  | -2.477556000 | -3.041082000  | 1.429232000  |
| 1  | 3.926250000  | -0.056786000  | 1.063283000  | 1  | -0.944895000 | -1.273035000  | 2.180062000  |
| 1  | 3.009954000  | 1.369262000   | 1.606164000  |    |              | 2_TS_PPh2Me_2 |              |
| 1  | 0.224290000  | 1.751029000   | -2.015513000 | 6  | -0.630238000 | -3.175893000  | -0.740827000 |
| 1  | -1.825820000 | 3.046233000   | -1.612620000 | 6  | 0.212242000  | -2.165742000  | -0.776649000 |
| 1  | -2.749052000 | 3.238971000   | 0.680113000  | 6  | 1.366932000  | -1.613140000  | -1.234885000 |
| 1  | -1.592575000 | 2.129367000   | 2.567889000  | 15 | -0.819763000 | -0.493217000  | 0.639144000  |
| 1  | 0.480651000  | 0.867064000   | 2.130742000  | 6  | 2.1310049000 | -1.123912000  | -0.269324000 |
| 1  | 0.805422000  | -2.185289000  | 2.007020000  | 8  | 2.204433000  | -1.280509000  | 0.943795000  |
|    |              | 2_TS_PPhMe2_3 |              | 8  | 3.319884000  | -0.415064000  | -0.816907000 |
| 6  | -0.296611000 | -3.188972000  | -1.419275000 | 6  | 4.290951000  | 0.124356000   | 0.083281000  |
| 6  | 0.043884000  | -1.943159000  | -1.170595000 | 6  | 5.333274000  | -0.909452000  | 0.444821000  |
| 6  | 0.917985000  | -0.918078000  | -1.370054000 | 6  | 0.054810000  | 1.004221000   | 0.164270000  |
| 15 | -1.526819000 | -1.174213000  | 0.407941000  | 6  | -2.560563000 | -0.173236000  | -0.251639000 |
| 6  | 2.074992000  | -0.737353000  | -0.532416000 | 6  | -0.739898000 | -0.573837000  | 2.439679000  |
| 8  | 2.460483000  | -1.477766000  | 0.364277000  | 6  | -3.470250000 | -0.303947000  | 1.198334000  |
| 8  | 2.747582000  | 0.393534000   | -0.854173000 | 6  | -4.796713000 | 0.525804000   | 0.849273000  |
| 6  | 3.865335000  | 0.732761000   | -0.031674000 | 6  | -5.229989000 | 0.2079164000  | -0.448742000 |
| 6  | 3.412441000  | 1.409059000   | 1.243306000  | 6  | -4.334391000 | -0.202075000  | -1.396918000 |



|    |              |               |               |    |              |              |              |
|----|--------------|---------------|---------------|----|--------------|--------------|--------------|
| 6  | -3.011724000 | -0.438144000  | -1.044736000  | 6  | 2.027055000  | -2.186183000 | 0.692651000  |
| 6  | 0.054684000  | 1.362860000   | -1.186591000  | 6  | 3.096796000  | 0.830189000  | -1.282149000 |
| 6  | 0.799075000  | 2.448619000   | -1.629481000  | 6  | 4.360163000  | 1.399506000  | -1.186998000 |
| 6  | 1.568899000  | 3.176226000   | -0.728856000  | 6  | 4.768703000  | 1.986335000  | 0.005466000  |
| 6  | 1.585440000  | 2.818198000   | 0.615424000   | 6  | 3.914429000  | 1.999866000  | 1.103208000  |
| 6  | 0.836857000  | 1.735588000   | 1.059983000   | 6  | 2.653860000  | 1.423412000  | 1.013116000  |
| 1  | -0.315748000 | -4.133397000  | -1.144393000  | 6  | -0.925281000 | 0.021841000  | 1.984808000  |
| 1  | -1.627235000 | -3.103148000  | -0.326703000  | 6  | -1.760429000 | 0.641747000  | 2.906083000  |
| 1  | 1.464083000  | -1.314385000  | -2.270745000  | 6  | -2.082551000 | 1.987822000  | 2.763765000  |
| 1  | 4.735808000  | 0.964783000   | -0.448036000  | 6  | -1.563002000 | 2.717746000  | 1.700185000  |
| 1  | 3.783908000  | 0.499538000   | 0.972722000   | 6  | -0.724429000 | 2.102855000  | 0.779086000  |
| 1  | 4.873395000  | -1.747980000  | 0.967454000   | 1  | 0.959819000  | -1.168042000 | -2.845817000 |
| 1  | 5.830325000  | -1.282520000  | -0.451296000  | 1  | -0.267721000 | -0.766149000 | -4.177655000 |
| 1  | 6.087060000  | -0.467126000  | 1.097413000   | 1  | -4.793687000 | -0.083716000 | -0.692341000 |
| 1  | 0.287991000  | -0.796998000  | 2.722428000   | 1  | -3.785378000 | 0.460188000  | 0.649718000  |
| 1  | -1.060768000 | 0.348706000   | 2.925614000   | 1  | -4.659995000 | -1.861037000 | 1.034182000  |
| 1  | -1.374304000 | -1.395308000  | 2.775098000   | 1  | -3.856134000 | -2.407230000 | -0.443407000 |
| 1  | -3.148537000 | 0.508850000   | 2.211538000   | 1  | -2.894060000 | -1.856585000 | 0.939554000  |
| 1  | -5.491884000 | 0.895695000   | 1.592175000   | 1  | -1.046128000 | -2.198603000 | -0.750023000 |
| 1  | -6.263676000 | 0.454293000   | -0.717916000  | 1  | -0.867647000 | -0.627132000 | -0.178581000 |
| 1  | -4.667344000 | -0.406222000  | -2.406413000  | 1  | 1.175321000  | -5.459117000 | 0.929651000  |
| 1  | -2.321710000 | -0.841662000  | -1.777747000  | 1  | 3.027086000  | -3.913166000 | 1.475511000  |
| 1  | -0.529475000 | 0.786189000   | -1.895854000  | 1  | 2.838764000  | -1.512359000 | 0.939802000  |
| 1  | 0.787079000  | 2.718354000   | -2.677670000  | 1  | 2.769776000  | 0.387082000  | -2.216316000 |
| 1  | 2.155895000  | 4.018151000   | -1.072997000  | 1  | 5.020064000  | 1.393524000  | -2.044834000 |
| 1  | 2.185903000  | 3.380098000   | 1.319656000   | 1  | 5.750097000  | 2.437016000  | 0.078610000  |
| 1  | 0.874460000  | 1.455619000   | 2.105241000   | 1  | 4.230680000  | 2.457677000  | 2.031658000  |
|    |              | 2_TS_PPh2Me_3 |               | 1  | 1.993256000  | 1.431783000  | 1.871841000  |
| 6  | 0.198942000  | -2.749702000  | -1.662642000  | 1  | -0.678296000 | -1.026622000 | 2.101521000  |
| 6  | -0.480641000 | -2.261808000  | -0.6477739000 | 1  | -2.158060000 | 0.073094000  | 3.737091000  |
| 6  | -1.630682000 | -2.217891000  | 0.077201000   | 1  | -2.472634000 | 2.467216000  | 3.481252000  |
| 15 | 0.911290000  | -0.653114000  | 0.341947000   | 1  | -1.810996000 | 3.765023000  | 1.585826000  |
| 6  | -2.746114000 | -1.407616000  | -0.350439000  | 1  | -0.311736000 | 2.675362000  | -0.044461000 |
| 8  | -2.896122000 | -0.878687000  | -1.441634000  | 1  | -1.238391000 | 2.285991000  | -2.757087000 |
| 8  | -3.676681000 | -1.297728000  | 0.629090000   |    |              | 2_TS_PPh3_2  |              |
| 6  | -4.766473000 | -0.409834000  | 0.374004000   | 6  | -0.157245000 | 0.862615000  | -3.092596000 |
| 6  | -4.345152000 | 1.023386000   | 0.611123000   | 6  | 0.575934000  | 0.112050000  | -2.296903000 |
| 6  | 2.657320000  | -0.214334000  | 0.161120000   | 6  | 1.746001000  | -0.559699000 | -2.102190000 |
| 6  | 0.010371000  | 0.896474000   | 0.117510000   | 15 | -0.769472000 | 0.009158000  | -0.345029000 |
| 6  | 0.726358000  | -1.059136000  | 2.090560000   | 6  | 2.700460000  | -0.017808000 | -1.175898000 |
| 6  | -0.229808000 | 1.786730000   | 1.166547000   | 8  | 2.598085000  | 1.063251000  | -0.604170000 |
| 6  | -0.882803000 | 2.989805000   | 0.928209000   | 8  | 3.757805000  | -0.836026000 | -0.971969000 |
| 6  | -1.296485000 | 3.315526000   | -0.359380000  | 6  | 4.738181000  | -0.395778000 | -0.030468000 |
| 6  | -1.073006000 | 2.429251000   | -1.407037000  | 6  | 5.735163000  | 0.540907000  | -0.674768000 |
| 6  | -0.431880000 | 1.220261000   | -1.166622000  | 6  | -2.213738000 | -1.074380000 | -0.346356000 |
| 6  | 3.061866000  | 0.599747000   | -0.902138000  | 6  | -0.648392000 | -0.648392000 | 0.927936000  |
| 6  | 4.406875000  | 0.865586000   | -1.115008000  | 6  | -1.349840000 | 1.618856000  | 0.204192000  |
| 6  | 5.370586000  | 0.311592000   | -0.277782000  | 6  | 0.857189000  | -1.909528000 | 0.683090000  |
| 6  | 4.979240000  | -0.509120000  | 0.773192000   | 6  | 1.771203000  | -2.459741000 | 1.573541000  |
| 6  | 3.632361000  | -0.773020000  | 0.992522000   | 6  | 2.143321000  | -1.752197000 | 2.710572000  |
| 1  | -0.241123000 | -3.556695000  | -2.241083000  | 6  | 1.591671000  | -0.498739000 | 2.962183000  |
| 1  | 1.177949000  | -2.390412000  | -1.947466000  | 6  | 0.678790000  | 0.053948000  | 2.074414000  |
| 1  | -1.671916000 | -2.645911000  | 1.071056000   | 6  | -0.440608000 | 2.680010000  | 0.120365000  |
| 1  | -5.119783000 | -0.553298000  | -0.646964000  | 6  | -0.823400000 | 3.956988000  | 0.506752000  |
| 1  | -5.552059000 | -0.712104000  | 1.064726000   | 6  | -2.120049000 | 4.189419000  | 0.955889000  |
| 1  | -3.994007000 | 1.153914000   | 1.636105000   | 6  | -3.031502000 | 3.141824000  | 1.024165000  |
| 1  | -3.540087000 | 1.296492000   | -0.072549000  | 6  | -2.650051000 | 1.858155000  | 0.651530000  |
| 1  | -5.185619000 | 1.698558000   | 0.445132000   | 6  | -2.967903000 | -1.171711000 | -1.517451000 |
| 1  | 1.124131000  | -2.056961000  | 2.277253000   | 6  | -4.110122000 | -1.961996000 | -1.553552000 |
| 1  | 1.238358000  | -0.344400000  | 2.734834000   | 6  | -4.499762000 | -2.670539000 | -0.422790000 |
| 1  | -0.336413000 | -1.061108000  | 2.333120000   | 6  | -3.748741000 | -2.585283000 | 0.745270000  |
| 1  | 0.097431000  | 1.548171000   | 2.171087000   | 6  | -2.611535000 | -1.789166000 | 0.786084000  |
| 1  | -1.065601000 | 3.673946000   | 1.746980000   | 1  | 0.265711000  | 1.184962000  | -4.039384000 |
| 1  | -1.802308000 | 4.254846000   | -0.543354000  | 1  | -1.159242000 | 1.191955000  | -2.850715000 |
| 1  | -1.408936000 | 2.671822000   | -2.406894000  | 1  | 5.224535000  | -1.304903000 | 0.321582000  |
| 1  | -0.282407000 | 0.513431000   | -1.975128000  | 1  | 4.235728000  | 0.082538000  | 0.811248000  |
| 1  | 2.318575000  | 1.033963000   | -1.561423000  | 1  | 6.227462000  | 0.055127000  | -1.518111000 |
| 1  | 4.703557000  | 1.506389000   | -1.935517000  | 1  | 5.236352000  | 1.442361000  | -1.029581000 |
| 1  | 6.419706000  | 0.518754000   | -0.444590000  | 1  | 6.498678000  | 0.829814000  | 0.048733000  |
| 1  | 5.722937000  | -0.943432000  | 1.429232000   | 1  | 0.564598000  | -2.461761000 | -0.203519000 |
| 1  | 3.345438000  | -1.413330000  | 1.817397000   | 1  | 2.194761000  | -3.436130000 | 1.376179000  |
|    |              | 2_TS_PPh3_1   |               | 1  | 2.858987000  | -2.177074000 | 3.402870000  |
| 6  | 0.112207000  | -0.582409000  | -3.177087000  | 1  | 1.873908000  | 0.049341000  | 3.851989000  |
| 6  | -0.490295000 | 0.321633000   | -2.431212000  | 1  | 0.260961000  | 1.033691000  | 2.270961000  |
| 6  | -1.438307000 | 1.298335000   | -2.361074000  | 1  | 0.564353000  | 2.488084000  | -0.242845000 |
| 15 | 0.631031000  | 0.029011000   | -0.361994000  | 1  | -0.114002000 | 4.772418000  | 0.448162000  |
| 6  | -2.646585000 | 1.138130000   | -1.600970000  | 1  | -2.420694000 | 5.187588000  | 1.247703000  |
| 8  | -3.512925000 | 1.988262000   | -1.441202000  | 1  | -4.041004000 | 3.322028000  | 1.370859000  |
| 8  | -2.760536000 | -0.095071000  | -1.046842000  | 1  | -3.363120000 | 1.044685000  | 0.711347000  |
| 8  | -3.862296000 | -0.274073000  | -0.156737000  | 1  | -2.654604000 | -0.631459000 | -2.403710000 |
| 6  | -3.810832000 | -1.685115000  | 0.373258000   | 1  | -4.688973000 | -2.030865000 | -2.465423000 |
| 6  | -0.399937000 | 0.749158000   | 0.915631000   | 1  | -5.385442000 | -3.292160000 | -0.451807000 |
| 6  | 0.874946000  | -1.697315000  | 0.075238000   | 1  | -4.050267000 | -3.137088000 | -1.626341000 |
| 6  | 2.237171000  | 0.831429000   | -0.181310000  | 1  | -2.032040000 | -1.720761000 | 1.699038000  |
| 6  | -0.161438000 | -2.579250000  | -0.249908000  | 1  | 1.883368000  | -1.566426000 | -2.475434000 |
| 6  | -0.058475000 | -3.926681000  | 0.067908000   |    |              | 2_TS_PPh3_3  |              |
| 6  | 1.090027000  | -4.407092000  | 0.689508000   | 6  | -0.309528000 | -0.049012000 | -3.219658000 |
| 6  | 2.132102000  | -3.538533000  | 0.995629000   | 6  | 0.408046000  | 0.630855000  | -2.327388000 |

|    |              |              |              |    |              |               |              |
|----|--------------|--------------|--------------|----|--------------|---------------|--------------|
| 6  | 1.455839000  | 1.453043000  | -2.108952000 | 1  | 4.996311000  | -1.207014000  | 2.020729000  |
| 15 | -0.672996000 | 0.033210000  | -0.316383000 | 1  | 3.743262000  | -3.672047000  | -1.810503000 |
| 6  | 2.715508000  | 0.993748000  | -1.594431000 | 1  | 1.542849000  | -1.652951000  | -1.484567000 |
| 8  | 3.694239000  | 1.688539000  | -1.352371000 | 1  | -1.137854000 | 0.803093000   | -1.660149000 |
| 8  | 2.723712000  | -0.345245000 | -1.378471000 | 1  | -2.773327000 | -0.4377467000 | -3.041619000 |
| 6  | 3.906280000  | -0.919461000 | -0.822453000 | 1  | -2.256757000 | -3.903246000  | -0.654345000 |
| 6  | 3.942448000  | -0.760602000 | 0.681164000  | 1  | -0.593266000 | -2.713010000  | 0.737880000  |
| 6  | 0.075738000  | -1.372283000 | 0.527965000  | 1  | -1.235396000 | -2.088186000  | 3.510337000  |
| 6  | -0.398943000 | 1.441458000  | 0.756633000  | 8  | -3.515907000 | -2.953876000  | -2.633956000 |
| 6  | -2.447097000 | -0.281305000 | -0.351863000 | 6  | -4.182331000 | -2.330490000  | -3.714669000 |
| 6  | 0.925987000  | 1.715449000  | 1.115141000  | 1  | -4.764335000 | -1.470010000  | -3.375758000 |
| 6  | 1.235049000  | 2.850331000  | 1.852715000  | 1  | -3.474992000 | -2.008670000  | -4.482713000 |
| 6  | 0.225191000  | 3.726516000  | 2.234795000  | 1  | -4.853789000 | -3.074314000  | -4.134832000 |
| 6  | -1.093523000 | 3.460950000  | 1.881418000  | 8  | 5.757166000  | -2.520730000  | -0.003110000 |
| 6  | -1.406694000 | 2.326652000  | 1.142763000  | 6  | 6.088669000  | -3.251189000  | -1.169264000 |
| 6  | -3.230919000 | 0.543572000  | -1.166729000 | 1  | 5.437360000  | -4.119975000  | -1.287899000 |
| 6  | -4.601734000 | 0.346808000  | -1.253650000 | 1  | 6.021151000  | -2.623134000  | -2.060569000 |
| 6  | -5.199923000 | -0.691680000 | -0.546531000 | 1  | 7.114621000  | -3.585815000  | -1.042965000 |
| 6  | -4.425069000 | -1.527107000 | 0.249569000  | 8  | 0.673126000  | 5.606718000   | -1.048693000 |
| 6  | -3.053680000 | -1.324181000 | 0.349955000  | 6  | 1.726629000  | 6.089469000   | -1.861427000 |
| 6  | 0.573265000  | -2.417148000 | -0.251854000 | 1  | 2.690897000  | 5.987979000   | -1.358336000 |
| 6  | 1.141554000  | -3.532010000 | 0.351918000  | 1  | 1.759490000  | 5.562334000   | -2.817652000 |
| 6  | 1.223495000  | -3.604048000 | 1.738501000  | 1  | 1.522865000  | 7.141953000   | -2.038333000 |
| 6  | 0.729490000  | -2.565386000 | 2.521913000  |    |              | 2_TS_Pani3_2  |              |
| 6  | 0.154869000  | -1.453195000 | 1.920082000  | 6  | 0.350542000  | 0.632085000   | 3.467474000  |
| 1  | -0.008254000 | -0.004922000 | -4.262136000 | 6  | -0.482249000 | -0.181065000  | 2.851542000  |
| 1  | -1.187710000 | -0.631950000 | -2.973733000 | 6  | -1.566673000 | -0.998137000  | 2.926726000  |
| 1  | 4.781412000  | -0.465398000 | -1.287672000 | 15 | 0.396811000  | -0.0396932000 | 0.606397000  |
| 1  | 3.867527000  | -1.972882000 | -1.099616000 | 6  | -2.830490000 | -0.659198000  | 2.330272000  |
| 1  | 4.814541000  | -1.273656000 | 1.089073000  | 8  | -3.826057000 | -1.371531000  | 2.312628000  |
| 1  | 4.004758000  | 0.293066000  | 0.955065000  | 8  | -2.837122000 | 0.573044000   | 1.765933000  |
| 1  | 3.046119000  | -1.193556000 | 1.132144000  | 6  | -4.016663000 | 0.913711000   | 1.036799000  |
| 1  | 1.712329000  | 1.021851000  | 0.838359000  | 6  | -3.822408000 | 2.288663000   | 0.448485000  |
| 1  | 2.263332000  | 3.047829000  | 2.127441000  | 6  | 0.805544000  | 1.575149000   | 0.089521000  |
| 1  | 0.464512000  | 4.612094000  | 2.809305000  | 6  | 1.825820000  | -1.116217000  | 0.215364000  |
| 1  | -1.883096000 | 4.136491000  | 2.184580000  | 6  | -0.902554000 | -0.665647000  | -0.485208000 |
| 1  | -2.437324000 | 2.128945000  | 0.875275000  | 6  | 2.791148000  | -1.320658000  | 1.198566000  |
| 1  | -2.758060000 | 1.339029000  | -1.733478000 | 6  | 3.940386000  | -2.061413000  | 0.944685000  |
| 1  | -5.200606000 | 0.994779000  | -1.880389000 | 6  | 4.126239000  | -2.622217000  | -0.318162000 |
| 1  | -6.267544000 | -0.853135000 | -0.621772000 | 6  | 3.157981000  | -2.436744000  | -1.311352000 |
| 1  | -4.888220000 | -2.338456000 | 0.796181000  | 6  | 2.025441000  | -1.046329000  | -1.046329000 |
| 1  | -2.457171000 | -1.977636000 | 0.974703000  | 6  | -1.421566000 | -1.940806000  | -0.259176000 |
| 1  | 0.532167000  | -2.343241000 | -1.332712000 | 6  | -2.477730000 | -2.437127000  | -1.015707000 |
| 1  | 1.528756000  | -4.337560000 | -0.258646000 | 6  | -3.032211000 | -1.644313000  | -2.019725000 |
| 1  | 1.674768000  | -4.468031000 | 2.209344000  | 6  | -2.515984000 | -0.367061000  | -2.260629000 |
| 1  | 0.791504000  | -2.621766000 | 3.601037000  | 6  | -1.468025000 | -0.115283000  | -1.499637000 |
| 1  | -0.230226000 | -0.645056000 | 2.530943000  | 6  | 1.905240000  | 1.904823000   | -0.697749000 |
| 1  | 1.313920000  | 2.524836000  | -2.166955000 | 6  | 2.163173000  | 3.223980000   | -1.057277000 |
|    |              | 2_TS_Pani3_1 |              | 6  | 1.303687000  | 4.235168000   | -0.628739000 |
| 6  | 0.159401000  | 0.796024000  | 3.561112000  | 6  | 0.198452000  | 3.917629000   | 0.168688000  |
| 6  | -0.523096000 | -0.161778000 | 2.968912000  | 6  | -0.037040000 | 2.606771000   | 0.531355000  |
| 6  | -1.472678000 | -1.130729000 | 3.063637000  | 8  | 1.467656000  | 5.539730000   | -0.928453000 |
| 15 | 0.403095000  | -0.045848000 | 0.744460000  | 8  | -4.061860000 | -2.030772000  | -2.802484000 |
| 6  | -2.749896000 | -1.022751000 | 2.412736000  | 8  | 5.201434000  | 3.358289000   | -3.663532000 |
| 8  | -3.623234000 | -1.880385000 | 2.404438000  | 6  | 2.577784000  | 5.908429000   | -1.725211000 |
| 8  | -2.922605000 | 0.163162000  | 1.778658000  | 6  | -4.634198000 | -3.303130000  | -2.566727000 |
| 6  | -4.102487000 | 0.271789000  | 0.982361000  | 6  | 6.211786000  | -3.559985000  | 0.307199000  |
| 6  | -4.098142000 | 1.627982000  | 0.322444000  | 1  | 1.222559000  | 1.068384000   | 2.998288000  |
| 6  | -0.745686000 | -0.862302000 | -0.360093000 | 1  | 0.146463000  | 0.898578000   | 4.500501000  |
| 6  | 0.572321000  | 1.641449000  | 0.157896000  | 1  | -1.468380000 | -2.004214000  | 3.314949000  |
| 6  | 1.991216000  | -0.842871000 | 0.454366000  | 1  | -4.178425000 | 0.163836000   | 0.257817000  |
| 6  | -0.418220000 | 2.559196000  | 0.539323000  | 1  | -4.876305000 | 0.886267000   | 1.708508000  |
| 6  | -0.367909000 | 3.871862000  | 0.114886000  | 1  | -4.722926000 | 2.589531000   | -0.087604000 |
| 6  | 0.693163000  | 4.307953000  | -0.686421000 | 1  | -3.628592000 | 3.021988000   | 1.232792000  |
| 6  | 1.696454000  | 3.412774000  | -1.056782000 | 1  | -2.986531000 | 2.298983000   | -0.252672000 |
| 6  | 1.625661000  | 2.089036000  | -0.634740000 | 1  | 2.644876000  | -0.898054000  | 2.186851000  |
| 6  | 2.980375000  | -0.730845000 | 1.440565000  | 1  | 4.669195000  | -2.202542000  | 1.729881000  |
| 6  | 4.229497000  | -1.291003000 | 1.261437000  | 1  | 3.319039000  | -2.885116000  | -2.283422000 |
| 6  | 4.518354000  | -1.996446000 | 0.088802000  | 1  | 1.284808000  | -1.553627000  | -1.825421000 |
| 6  | 3.542056000  | -2.127989000 | -0.898540000 | 1  | -0.992960000 | -2.565616000  | -0.517230000 |
| 6  | 2.292005000  | -1.548537000 | -0.708412000 | 1  | -2.859378000 | -3.427621000  | -0.812824000 |
| 6  | -1.373839000 | -0.229060000 | -1.428619000 | 1  | -2.954956000 | 0.230269000   | -3.049729000 |
| 6  | -2.306324000 | -0.896737000 | -2.216650000 | 1  | -1.083091000 | 1.108902000   | -1.696950000 |
| 6  | -2.623511000 | -2.224478000 | -1.931212000 | 1  | 2.576634000  | 1.127133000   | -1.042790000 |
| 6  | -1.998282000 | -2.872771000 | -0.861438000 | 1  | 3.025787000  | 3.449634000   | -1.667978000 |
| 6  | -1.074600000 | -2.198362000 | -0.086794000 | 1  | -0.451271000 | 4.717500000   | 0.500506000  |
| 1  | 0.970560000  | 1.335754000  | 3.090343000  | 1  | -0.885708000 | 2.364776000   | 1.163094000  |
| 1  | -0.113739000 | 1.077065000  | 4.574136000  | 1  | 2.525914000  | 6.986831000   | -1.846955000 |
| 1  | -4.980379000 | 0.140692000  | 1.617154000  | 1  | 3.518299000  | 5.645095000   | -1.235974000 |
| 1  | -4.103043000 | -0.533848000 | 0.242950000  | 1  | 2.533956000  | 5.431812000   | -2.707108000 |
| 1  | -5.006168000 | 1.752446000  | -0.268315000 | 1  | -3.904395000 | -4.100361000  | -2.726185000 |
| 1  | -4.063457000 | 2.422438000  | 1.069466000  | 1  | -5.031255000 | -3.373698000  | -1.551415000 |
| 1  | -3.239042000 | 1.736616000  | -0.341450000 | 1  | -5.447054000 | -3.413611000  | -3.279366000 |
| 1  | -1.234385000 | 2.227040000  | 1.172821000  | 1  | 6.982065000  | -4.160223000  | -0.168982000 |
| 1  | -1.131881000 | 4.583733000  | 0.400382000  | 1  | 6.692281000  | -2.609295000  | 0.630008000  |
| 1  | 2.527542000  | 3.732311000  | -1.669255000 | 1  | 5.822195000  | -4.095167000  | 1.175974000  |
| 1  | 2.407285000  | 1.400331000  | -0.933909000 |    |              | 2_TS_Pani3_3  |              |
| 1  | 2.760008000  | -0.200659000 | 2.360878000  | 6  | 0.442037000  | 0.512433000   | 3.516129000  |

|    |              |               |              |    |              |              |              |             |
|----|--------------|---------------|--------------|----|--------------|--------------|--------------|-------------|
| 6  | -0.292249000 | -0.398067000  | 2.911326000  | 6  | -0.844423000 | -2.203729000 | -0.387012000 |             |
| 6  | -1.230052000 | -1.377917000  | 3.007181000  | 1  | 1.008830000  | 1.322098000  | 2.874580000  |             |
| 15 | 0.436107000  | -0.099564000  | 0.629854000  | 1  | -0.122843000 | 0.990457000  | 4.307144000  |             |
| 6  | -2.557575000 | -1.227938000  | 2.475551000  | 1  | -4.869236000 | 0.115011000  | 1.223891000  |             |
| 8  | -3.425723000 | -2.090673000  | 2.467028000  | 1  | -3.992552000 | -0.530035000 | -0.163774000 |             |
| 8  | -2.786457000 | 0.005444000   | 1.961716000  | 1  | -4.887894000 | 1.769470000  | -0.623349000 |             |
| 6  | -4.028408000 | 0.168649000   | 1.276847000  | 1  | -3.944693000 | 2.405958000  | 0.730167000  |             |
| 6  | -4.084313000 | 1.576883000   | 0.273992000  | 1  | -3.121154000 | 1.750548000  | -0.695914000 |             |
| 6  | -0.803772000 | -0.828065000  | -0.438980000 | 1  | -1.182018000 | 2.186373000  | 0.892802000  |             |
| 6  | 0.569913000  | 1.626220000   | 0.156810000  | 1  | -1.119691000 | 4.573368000  | 0.159345000  |             |
| 6  | 1.980136000  | -0.891208000  | 0.150633000  | 1  | 2.622611000  | 3.883828000  | -1.787459000 |             |
| 6  | -0.387984000 | 2.508666000   | 0.679380000  | 1  | 2.560238000  | 1.494970000  | -1.094961000 |             |
| 6  | -0.366590000 | 3.850214000   | 0.354781000  | 1  | 2.798896000  | -0.217983000 | 2.214110000  |             |
| 6  | 0.633944000  | 4.350356000   | -0.485975000 | 1  | 5.079972000  | -1.180193000 | 1.930886000  |             |
| 6  | 1.606808000  | 3.490474000   | -0.994747000 | 1  | 4.055620000  | -2.473456000 | -2.011695000 |             |
| 6  | 1.564596000  | 2.137727000   | -0.671930000 | 1  | 1.782867000  | -1.495585000 | -1.755521000 |             |
| 6  | 2.986735000  | -1.030391000  | 1.103209000  | 1  | -1.007760000 | 0.824329000  | -1.920976000 |             |
| 6  | 4.213792000  | -1.602246000  | 0.784373000  | 1  | -2.605413000 | -0.438234000 | -3.345811000 |             |
| 6  | 4.438321000  | -2.056612000  | -0.514313000 | 1  | -1.964630000 | -3.950481000 | -0.995695000 |             |
| 6  | 3.431927000  | -1.933279000  | -1.479145000 | 1  | -0.347356000 | -2.708013000 | 0.433965000  |             |
| 6  | 2.221200000  | -1.358206000  | -1.148826000 | 1  | -1.158235000 | -2.144913000 | 3.127317000  |             |
| 6  | -1.523926000 | -0.114343000  | -1.392561000 | 9  | 5.884498000  | -2.388581000 | -0.199515000 |             |
| 6  | -2.515473000 | -0.725067000  | -2.154339000 | 9  | 0.791979000  | 5.606238000  | -1.230159000 |             |
| 6  | -2.799437000 | -2.076343000  | -1.958709000 | 9  | -3.220138000 | -2.916326000 | -2.998338000 |             |
| 6  | -2.082849000 | -2.804895000  | -1.004253000 |    |              |              |              |             |
| 6  | -1.100788000 | -2.186583000  | -0.254979000 | 6  | 0.223798000  | 2_Ts_Ppfp3_2 | 0.762127000  | 3.283411000 |
| 1  | 1.211442000  | 1.090124000   | 3.020767000  | 6  | -0.566854000 | 0.045350000  | 2.512067000  |             |
| 1  | 0.259160000  | 0.710976000   | 4.568244000  | 6  | -1.749850000 | -0.615135000 | 2.364683000  |             |
| 1  | -4.850358000 | -0.027387000  | 1.967314000  | 15 | 0.634273000  | 0.012596000  | 0.467034000  |             |
| 1  | -4.086026000 | -0.569575000  | 0.472134000  | 6  | -2.751281000 | -0.034637000 | 1.514260000  |             |
| 1  | -5.037662000 | 1.741526000   | 0.237012000  | 8  | -2.671235000 | 0.067567000  | 0.979712000  |             |
| 1  | -3.992876000 | 2.303709000   | 1.548546000  | 8  | -3.821213000 | -0.840344000 | 1.334269000  |             |
| 1  | -3.282090000 | 1.752550000   | 0.021613000  | 6  | -4.845299000 | -0.365711000 | -0.457431000 |             |
| 1  | -1.155119000 | 2.125171000   | 1.344575000  | 6  | -5.812058000 | 0.540635000  | 1.185302000  |             |
| 1  | -1.105788000 | 4.535585000   | 0.749475000  | 6  | -0.532874000 | -0.619770000 | -0.735418000 |             |
| 1  | 2.391929000  | 3.859608000   | -1.639208000 | 6  | 1.165188000  | -0.163578000 | -0.089267000 |             |
| 1  | 2.322499000  | 1.478180000   | -1.078397000 | 6  | 2.068860000  | -1.072902000 | 0.335504000  |             |
| 1  | 2.810716000  | -0.691991000  | 2.118629000  | 6  | 0.262114000  | 2.690289000  | 0.095216000  |             |
| 1  | 4.973328000  | -1.698076000  | 1.547088000  | 6  | 0.598484000  | 3.980924000  | -0.283500000 |             |
| 1  | 3.625386000  | -2.297128000  | -2.480166000 | 6  | 1.854240000  | 4.198693000  | -0.822493000 |             |
| 1  | 1.449537000  | -1.267304000  | -1.904817000 | 6  | 2.778627000  | 3.186495000  | -1.001386000 |             |
| 1  | -1.313325000 | 0.936350000   | -1.554995000 | 6  | 2.424718000  | 1.895703000  | -0.631736000 |             |
| 1  | -3.052416000 | -0.144583000  | -2.891264000 | 6  | 2.846791000  | -1.294428000 | 1.473409000  |             |
| 1  | -2.316577000 | -3.852596000  | -0.865546000 | 6  | 3.976143000  | -2.09938000  | -1.416003000 |             |
| 1  | -0.547920000 | -2.763297000  | 0.478877000  | 6  | 4.300752000  | -2.682759000 | 0.205677000  |             |
| 1  | -0.955072000 | -2.366609000  | 3.352835000  | 6  | 3.550810000  | -2.495188000 | -0.942411000 |             |
| 8  | -3.742751000 | -2.754897000  | -2.646027000 | 6  | 2.429647000  | -1.682492000 | -0.869751000 |             |
| 6  | -4.497823000 | -2.050046000  | -3.612224000 | 6  | -1.027569000 | 0.125333000  | -1.806722000 |             |
| 1  | -5.052280000 | -1.226754000  | -3.155408000 | 6  | -2.018987000 | -0.392215000 | -2.626635000 |             |
| 1  | -3.857163000 | -1.658371000  | -4.406020000 | 6  | -2.508402000 | -1.657393000 | -2.350841000 |             |
| 1  | -5.199439000 | -2.762788000  | -4.036938000 | 6  | -2.039837000 | -2.429182000 | -1.305179000 |             |
| 8  | 5.587851000  | -2.630289000  | -0.922285000 | 6  | -1.897137000 | -1.897161000 | -0.492633000 |             |
| 6  | 6.630884000  | -2.780054000  | 0.022952000  | 1  | 1.210051000  | 1.094192000  | 2.986432000  |             |
| 1  | 6.956546000  | -1.810648000  | 0.406908000  | 1  | -0.131671000 | 1.051574000  | 4.267801000  |             |
| 1  | 6.319217000  | -3.413890000  | 0.856162000  | 1  | -5.345608000 | -1.261572000 | 0.091129000  |             |
| 1  | 7.456097000  | -3.254964000  | -0.500321000 | 1  | -4.383213000 | 0.148795000  | -0.386058000 |             |
| 8  | 0.588979000  | 5.672794000   | -0.746313000 | 1  | -6.608714000 | 0.856539000  | 0.510530000  |             |
| 1  | 1.585291000  | 6.221106000   | -1.588792000 | 1  | -6.263865000 | 0.019333000  | 2.030028000  |             |
| 6  | 2.581152000  | 6.087867000   | -1.159987000 | 1  | -5.298158000 | 1.428336000  | 1.553284000  |             |
| 1  | 1.554886000  | 5.767208000   | -2.581969000 | 1  | -0.710262000 | 2.485608000  | 0.532045000  |             |
| 1  | 1.369358000  | 7.282711000   | -1.672254000 | 1  | -0.086397000 | 4.808469000  | -0.157713000 |             |
|    |              | 2_Ts_Ppfp3_1  |              | 1  | 3.748780000  | 3.110300000  | -1.423546000 |             |
| 6  | 0.191696000  | 0.750881000   | 3.295816000  | 1  | 3.137060000  | 1.091774000  | -0.769051000 |             |
| 6  | -0.449307000 | -0.198280000  | 2.643909000  | 1  | 2.563078000  | -0.840451000 | 2.415688000  |             |
| 6  | -1.391128000 | -1.182328000  | 2.689811000  | 1  | 4.589367000  | -2.285636000 | 2.287176000  |             |
| 15 | 0.527229000  | -0.018542000  | 0.495292000  | 1  | 3.846495000  | -2.977339000 | -1.864319000 |             |
| 6  | -2.650532000 | -1.069829000  | 2.008091000  | 1  | 1.830708000  | -1.520171000 | -1.757850000 |             |
| 8  | -3.519911000 | -1.930011000  | 1.959836000  | 1  | -0.645914000 | 1.119557000  | -2.001597000 |             |
| 8  | -2.812370000 | 0.128087000   | 1.390993000  | 1  | -2.414319000 | 0.167741000  | -3.463295000 |             |
| 6  | -3.990078000 | 0.258122000   | 0.593671000  | 1  | -2.450908000 | -3.414521000 | -1.132522000 |             |
| 6  | -3.980863000 | 1.628936000   | -0.034942000 | 1  | -0.665675000 | -2.484628000 | 0.334942000  |             |
| 6  | -0.571443000 | -0.855929000  | -0.644519000 | 1  | -1.872297000 | -1.633210000 | -2.711145000 |             |
| 6  | 0.674521000  | 1.680163000   | -0.068774000 | 9  | 5.385915000  | -3.470307000 | 0.140792000  |             |
| 6  | 2.141865000  | -0.780367000  | 0.244669000  | 9  | 2.192246000  | 5.448485000  | -1.180864000 |             |
| 6  | -0.355795000 | 2.554909000   | 0.294365000  | 9  | -3.478362000 | -2.156695000 | -3.136767000 |             |
| 6  | -0.330473000 | 3.882710000   | -0.105186000 |    |              |              |              |             |
| 6  | 0.751585000  | 4.319515000   | -0.848773000 | 6  | 0.492335000  | 2_Ts_Ppfp3_3 | 0.696038000  | 3.337406000 |
| 6  | 1.797800000  | 3.489922000   | -1.209254000 | 6  | -0.424555000 | 0.124207000  | 2.584792000  |             |
| 6  | 1.751943000  | 2.159543000   | -0.815627000 | 6  | -1.696233000 | -0.356257000 | 2.476129000  |             |
| 6  | 3.073662000  | -0.698767000  | 1.282306000  | 15 | 0.658247000  | -0.009195000 | 0.484634000  |             |
| 6  | 4.345900000  | -1.233215000  | 1.138488000  | 8  | -2.636461000 | 0.393346000  | 1.690778000  |             |
| 6  | 4.659387000  | -1.859715000  | -0.053576000 | 8  | -2.430786000 | 1.504308000  | 1.210393000  |             |
| 6  | 3.761794000  | -1.970533000  | -1.100354000 | 8  | -3.806746000 | -0.252679000 | 1.500535000  |             |
| 6  | 2.496815000  | -1.422447000  | -0.944338000 | 6  | -4.750342000 | 0.388925000  | 0.641197000  |             |
| 6  | -1.209763000 | -0.2128587000 | -1.709795000 | 6  | -5.833568000 | -0.610585000 | -0.322213000 |             |
| 6  | -2.105327000 | -0.912001000  | -2.511865000 | 6  | -0.647241000 | -0.446793000 | -0.659339000 |             |
| 6  | -2.352034000 | -2.242806000  | -2.224857000 | 6  | 1.379297000  | 1.539546000  | -0.069667000 |             |
| 6  | -1.739600000 | -2.908829000  | -1.179413000 | 6  | 1.923636000  | -1.274559000 | 0.256522000  |             |

|    |              |              |              |    |              |              |              |
|----|--------------|--------------|--------------|----|--------------|--------------|--------------|
| 6  | 0.655879000  | 2.706778000  | 0.204762000  | 1  | -3.013769000 | -0.328633000 | -2.006391000 |
| 6  | 1.151998000  | 3.947023000  | -0.167223000 | 1  | -5.143498000 | -0.644704000 | 0.159878000  |
| 6  | 2.385836000  | 3.998149000  | -0.791429000 | 1  | -5.458663000 | -0.338763000 | -1.545205000 |
| 6  | 3.136262000  | 2.869016000  | -1.062279000 | 1  | -5.674406000 | -2.773776000 | -1.017825000 |
| 6  | 2.622436000  | 1.631776000  | -0.698040000 | 1  | -4.350239000 | -2.484077000 | -2.141443000 |
| 6  | 2.756028000  | -1.586417000 | 1.333482000  | 1  | -4.071506000 | -2.839937000 | 0.874441000  |
| 6  | 3.765676000  | -2.529785000 | 1.201449000  | 1  | -3.633660000 | -4.040002000 | -0.335193000 |
| 6  | 3.915760000  | -3.158303000 | -0.020375000 | 1  | -1.900689000 | -2.520953000 | -1.254238000 |
| 6  | 3.106297000  | -2.884117000 | -1.108749000 | 1  | -1.649880000 | -2.803599000 | 0.465708000  |
| 6  | 2.106983000  | -1.933590000 | -0.962442000 | 1  | -0.299607000 | -0.178107000 | 2.712345000  |
| 6  | -1.098839000 | 0.387160000  | -1.683253000 | 1  | -0.696577000 | -1.840234000 | 2.283006000  |
| 6  | -2.201320000 | 0.031496000  | -2.445679000 | 1  | 2.043582000  | -0.767361000 | 3.097507000  |
| 6  | -2.843932000 | -1.160785000 | -2.158842000 | 1  | 1.005760000  | -1.788224000 | 4.086467000  |
| 6  | -2.420229000 | -2.018899000 | -1.162509000 | 1  | 2.817292000  | -3.114072000 | 2.996898000  |
| 6  | -1.314824000 | -1.649291000 | -0.407861000 | 1  | 1.231197000  | -3.631524000 | -2.437294000 |
| 1  | 1.500821000  | 0.900052000  | 3.001477000  | 1  | 3.072103000  | -1.705771000 | 0.942994000  |
| 1  | 0.225835000  | 0.994167000  | 4.346979000  | 1  | 2.793338000  | -3.391684000 | 0.513437000  |
| 1  | -4.238838000 | 0.724195000  | -0.262930000 | 1  | 0.375398000  | -2.898490000 | 0.189841000  |
| 1  | -5.152220000 | 1.272262000  | 1.142260000  | 1  | 1.365200000  | -1.897607000 | -0.867558000 |
| 1  | -6.579017000 | -0.154514000 | -0.329513000 |    |              |              |              |
| 1  | -5.414734000 | -1.478971000 | -0.189734000 | 6  | -0.684440000 | 2_TS_Pcy3_2  | 0.619139000  |
| 1  | -6.331734000 | -0.950236000 | 1.230718000  | 6  | 0.322423000  | 0.180994000  | -2.465357000 |
| 1  | -0.303463000 | 2.630855000  | 0.706815000  | 6  | 1.603977000  | -0.264492000 | -2.405306000 |
| 1  | 0.607436000  | 4.860697000  | 0.028765000  | 15 | -0.694655000 | 0.061184000  | -0.213338000 |
| 1  | 4.097171000  | 2.964682000  | -1.549373000 | 6  | 2.590751000  | 0.468528000  | -1.662883000 |
| 1  | 3.196235000  | 0.737407000  | -0.906929000 | 8  | 2.467769000  | 1.605403000  | -1.222503000 |
| 1  | 2.610258000  | -1.093037000 | 2.287174000  | 8  | 3.716632000  | -0.251499000 | -1.448095000 |
| 1  | 4.418458000  | -2.785556000 | 2.024761000  | 6  | 4.706677000  | 0.364682000  | -0.625327000 |
| 1  | 3.264080000  | -3.405595000 | -2.043104000 | 6  | 5.850305000  | -0.607432000 | -0.480157000 |
| 1  | 1.465651000  | -1.702198000 | -1.804143000 | 6  | -1.221719000 | 1.639018000  | 0.567914000  |
| 1  | -0.596135000 | 1.325033000  | -1.883594000 | 6  | -2.051572000 | -1.171947000 | 0.018650000  |
| 1  | -2.568581000 | 0.663328000  | -3.243043000 | 6  | 0.620788000  | -0.580035000 | 0.892912000  |
| 1  | -2.952706000 | -2.942537000 | -0.979790000 | 6  | -3.474095000 | -0.617403000 | 0.078685000  |
| 1  | -0.965871000 | -2.304533000 | 0.382483000  | 6  | -4.461808000 | -1.744255000 | 0.368527000  |
| 1  | -1.945719000 | -1.363571000 | 2.783662000  | 6  | -4.379574000 | -2.831809000 | -0.695888000 |
| 9  | 4.883809000  | -4.078281000 | -0.156179000 | 6  | -2.956957000 | -3.364660000 | -0.815928000 |
| 9  | 2.879245000  | 5.196944000  | -1.143236000 | 6  | -1.980587000 | -2.227446000 | -1.091777000 |
| 9  | -3.929237000 | -1.495497000 | -2.879044000 | 6  | 0.292303000  | -0.541760000 | 2.388856000  |
|    |              | 2_TS_Pcy3_1  |              | 6  | 1.527301000  | -0.917804000 | 3.203321000  |
| 6  | 0.080107000  | -0.028574000 | -3.242567000 | 6  | 2.029092000  | -2.304939000 | 2.821387000  |
| 6  | 0.716489000  | 0.397418000  | -2.173503000 | 6  | 2.297701000  | -2.390987000 | 1.324225000  |
| 6  | 1.828460000  | 0.924717000  | -1.604286000 | 6  | 1.056879000  | -2.002890000 | 0.526056000  |
| 15 | -0.742736000 | -0.026101000 | -0.277781000 | 6  | -0.018083000 | 2.524783000  | 0.907099000  |
| 6  | 3.052362000  | 0.162583000  | -1.493187000 | 6  | -0.478058000 | 3.813035000  | 1.583105000  |
| 8  | 3.319742000  | -0.896458000 | -2.041144000 | 6  | -1.444403000 | 4.587369000  | 0.696177000  |
| 8  | 3.948293000  | 0.783288000  | -0.690440000 | 6  | -2.624125000 | 3.710808000  | 0.297121000  |
| 6  | 5.225263000  | 0.154162000  | -0.569039000 | 6  | -2.136397000 | 2.431768000  | -0.374416000 |
| 6  | 6.059519000  | 0.990621000  | 0.368057000  | 1  | -0.500896000 | 0.871572000  | -4.230544000 |
| 6  | 0.498904000  | -0.825456000 | 0.803898000  | 1  | -1.687287000 | 0.743638000  | -2.804987000 |
| 6  | -0.893667000 | 1.671939000  | 0.439483000  | 1  | 1.830588000  | -1.285722000 | -2.686773000 |
| 6  | -2.377628000 | -0.824613000 | -0.016342000 | 1  | 5.029167000  | 1.301167000  | -1.083703000 |
| 6  | -1.106737000 | 2.742213000  | -0.638442000 | 1  | 4.262074000  | 0.607616000  | 0.344199000  |
| 6  | -1.026711000 | 4.140957000  | -0.036707000 | 1  | 5.511382000  | -1.536438000 | -0.019420000 |
| 6  | -2.046312000 | 4.315979000  | 1.080840000  | 1  | 6.284275000  | -0.841403000 | -1.452591000 |
| 6  | -1.854459000 | 3.246748000  | 2.148128000  | 1  | 6.628088000  | -0.174600000 | 0.149026000  |
| 6  | -1.945069000 | 1.850236000  | 1.540019000  | 1  | -1.769136000 | 1.411675000  | 1.493610000  |
| 6  | -3.382392000 | -0.184588000 | -0.982111000 | 1  | -1.853988000 | -1.671172000 | 0.977397000  |
| 6  | -4.762527000 | -0.817450000 | -0.853401000 | 1  | 1.478451000  | 0.083013000  | 0.712925000  |
| 6  | -4.687678000 | -2.315828000 | -1.112143000 | 1  | -3.561834000 | 0.166061000  | 0.834825000  |
| 6  | -3.703225000 | -2.966027000 | -0.150298000 | 1  | -3.724766000 | -0.167715000 | -0.889660000 |
| 6  | -2.318718000 | -2.333593000 | -0.255673000 | 1  | -4.226141000 | -2.178450000 | 1.346924000  |
| 6  | 0.098309000  | -1.085218000 | 2.254767000  | 1  | -5.476673000 | -1.345514000 | 0.430135000  |
| 6  | 1.302810000  | -1.574473000 | 3.057289000  | 1  | -5.076011000 | -3.641854000 | -0.469640000 |
| 6  | 1.945492000  | -2.799885000 | 2.418950000  | 1  | -4.681468000 | -2.605770000 | -1.660577000 |
| 6  | 2.330474000  | -2.515044000 | 0.971759000  | 1  | -2.673893000 | -3.857530000 | 0.121705000  |
| 1  | 1.104758000  | -2.083855000 | 0.175986000  | 1  | -2.894153000 | -4.116302000 | -1.605586000 |
| 6  | 0.509606000  | 0.184553000  | -4.217369000 | 1  | -2.241862000 | -1.742873000 | -2.040422000 |
| 1  | -0.850737000 | -0.575904000 | -3.199531000 | 1  | -0.963149000 | -2.608407000 | -1.206437000 |
| 1  | 1.789952000  | 1.880837000  | -1.093971000 | 1  | -0.076419000 | 0.438209000  | 2.695825000  |
| 1  | 5.091580000  | -0.860807000 | -0.189701000 | 1  | -0.505799000 | -1.263981000 | -2.596950000 |
| 1  | 5.682548000  | 0.079802000  | -1.557450000 | 1  | 2.315725000  | -0.181098000 | 3.005947000  |
| 1  | 5.590332000  | 1.054089000  | 1.350384000  | 1  | 1.303960000  | -0.871644000 | 4.271393000  |
| 1  | 7.045687000  | 0.541684000  | 0.486642000  | 1  | 2.927962000  | -2.557290000 | 3.387860000  |
| 1  | 6.185770000  | 2.000609000  | -0.022647000 | 1  | 1.263881000  | -3.043791000 | 3.086706000  |
| 1  | 1.301766000  | -0.072188000 | 0.817780000  | 1  | 3.112586000  | -1.705276000 | 1.059403000  |
| 1  | 0.093910000  | 1.851255000  | 0.889623000  | 1  | 2.622829000  | -3.396975000 | 1.050201000  |
| 1  | -2.706012000 | -0.648718000 | 1.016872000  | 1  | 0.243358000  | -2.396985000 | 0.771500000  |
| 1  | -0.373153000 | 2.634735000  | -1.439108000 | 1  | 1.248849000  | -2.089941000 | -0.544329000 |
| 1  | -2.093037000 | 2.599460000  | -1.095183000 | 1  | 0.697055000  | 2.006859000  | 1.548059000  |
| 1  | -0.019481000 | 4.291634000  | 0.369792000  | 1  | 0.511225000  | 2.757433000  | -0.023049000 |
| 1  | -1.174221000 | 4.892762000  | -0.814913000 | 1  | -0.978009000 | 3.560486000  | 2.525900000  |
| 1  | -1.969601000 | 5.313687000  | 1.518073000  | 1  | 0.387446000  | 4.429710000  | 1.834855000  |
| 1  | -3.055238000 | 4.224172000  | 0.661895000  | 1  | -1.789072000 | 5.491917000  | 1.201926000  |
| 1  | -0.868511000 | 3.371696000  | 2.610426000  | 1  | -0.917253000 | 4.904851000  | -0.210572000 |
| 1  | -2.597860000 | 3.356851000  | 2.940727000  | 1  | -3.201086000 | 3.440933000  | 1.191422000  |
| 1  | -2.943082000 | 1.720262000  | 1.106627000  | 1  | -3.296655000 | 4.252925000  | -0.371086000 |
| 1  | -1.838956000 | 1.092949000  | 2.317619000  | 1  | -1.554189000 | 2.693444000  | -1.266039000 |
| 1  | -3.442835000 | 0.893161000  | -0.818024000 | 1  | -2.982820000 | 1.832600000  | -0.711187000 |

|    |              |              |              |    |              |              |              |  |
|----|--------------|--------------|--------------|----|--------------|--------------|--------------|--|
|    |              | 2_TS_PCy3_3  |              |    |              |              |              |  |
| 6  | 0.166594000  | 0.967692000  | -3.142424000 | 6  | 0.325978000  | -4.615752000 | -0.675224000 |  |
| 6  | -0.631290000 | 1.031970000  | -2.099879000 | 6  | -4.646612000 | -0.835582000 | 0.576510000  |  |
| 6  | -1.828403000 | 1.356300000  | -1.555149000 | 1  | 0.561043000  | 1.670929000  | -3.766309000 |  |
| 15 | 0.807392000  | 0.1033682000 | -0.302242000 | 1  | -0.947711000 | 1.617797000  | -2.684350000 |  |
| 6  | -2.916752000 | 0.409263000  | -1.571699000 | 1  | 2.044039000  | -1.053870000 | -2.105660000 |  |
| 8  | -2.949109000 | -0.658071000 | -2.168645000 | 1  | 5.457694000  | -0.870544000 | 0.645813000  |  |
| 8  | -3.966145000 | 0.832289000  | -0.829536000 | 1  | 4.775317000  | 0.747986000  | 0.880694000  |  |
| 6  | -5.100630000 | -0.034701000 | -0.791220000 | 1  | 3.582258000  | -1.845949000 | 1.994072000  |  |
| 6  | -6.075343000 | 0.535194000  | 0.208185000  | 1  | 4.510505000  | -0.671860000 | 2.937609000  |  |
| 6  | -0.439401000 | -0.220382000 | 0.990085000  | 1  | 2.940884000  | -0.212633000 | 2.263666000  |  |
| 6  | 1.950582000  | -1.316508000 | -0.495370000 | 1  | -1.105334000 | 1.137179000  | 2.303873000  |  |
| 6  | 1.828661000  | 1.458586000  | 0.390102000  | 1  | 0.308975000  | 1.938745000  | 1.625179000  |  |
| 6  | 2.552760000  | -1.886488000 | 0.788010000  | 1  | -2.922321000 | 1.020634000  | -0.708974000 |  |
| 6  | 3.629679000  | -2.915706000 | 0.455069000  | 1  | -2.463048000 | -0.626462000 | -1.077051000 |  |
| 6  | 3.062544000  | -4.028421000 | -0.419037000 | 1  | 1.048646000  | -0.867808000 | 0.822263000  |  |
| 6  | 2.448714000  | -3.458854000 | -1.692992000 | 1  | -0.419262000 | -1.156023000 | 1.739893000  |  |
| 6  | 1.365706000  | -2.437842000 | -1.359726000 | 1  | -2.703678000 | -1.166961000 | -1.428317000 |  |
| 6  | 3.009787000  | 1.808453000  | -0.517633000 | 1  | -3.308200000 | 0.464380000  | 1.660016000  |  |
| 6  | 3.802570000  | 2.983706000  | 0.046396000  | 1  | -2.635810000 | 1.624811000  | 1.152739000  |  |
| 6  | 2.914069000  | 4.203622000  | 0.250369000  | 1  | -1.451467000 | 3.606072000  | 2.007477000  |  |
| 6  | 1.738682000  | 3.859346000  | 1.155609000  | 1  | -1.352203000 | -2.550318000 | -0.011739000 |  |
| 6  | 0.942766000  | 2.695905000  | 0.576924000  | 1  | -0.215800000 | -1.956164000 | -1.207896000 |  |
| 6  | -1.191346000 | -1.528730000 | 0.737181000  | 1  | -1.485678000 | 2.999743000  | -0.983099000 |  |
| 6  | -2.437114000 | -1.591139000 | 1.613845000  | 1  | -1.882483000 | 4.524407000  | -0.220216000 |  |
| 6  | -2.056539000 | -1.484246000 | 3.086097000  | 1  | 0.497612000  | 4.683143000  | 0.635407000  |  |
| 6  | -1.263127000 | -0.209731000 | 3.349707000  | 1  | 0.882634000  | 3.189428000  | -0.226485000 |  |
| 6  | -0.024096000 | -0.132699000 | 2.459744000  | 1  | 0.417354000  | 4.630853000  | -1.128111000 |  |
| 1  | 1.150600000  | 0.520736000  | -3.115423000 | 1  | 1.657917000  | -3.044520000 | -0.030615000 |  |
| 1  | -0.180936000 | 1.381695000  | -4.085138000 | 1  | 0.573490000  | -3.619417000 | 1.223276000  |  |
| 1  | -1.941415000 | 2.253364000  | -0.957667000 | 1  | 1.016180000  | -5.431744000 | -0.457683000 |  |
| 1  | -5.537387000 | -0.098132000 | -1.789953000 | 1  | -0.687757000 | -4.973586000 | -0.481242000 |  |
| 1  | -4.777037000 | -1.038008000 | -0.507664000 | 1  | 0.398832000  | -4.390862000 | -1.741781000 |  |
| 1  | -5.624405000 | 0.581298000  | 1.200679000  | 1  | -5.218285000 | -0.979712000 | 1.496560000  |  |
| 1  | -6.383860000 | 1.540516000  | -0.079655000 | 1  | -5.162224000 | -0.055705000 | 0.007386000  |  |
| 1  | -6.962804000 | -0.095344000 | 0.262612000  | 1  | -5.650450000 | -2.484126000 | -0.421261000 |  |
| 1  | -1.166093000 | 0.589937000  | 0.810461000  | 1  | -4.128001000 | -2.026205000 | -1.173529000 |  |
| 1  | 2.770703000  | -0.878453000 | -1.082813000 | 1  | -4.123415000 | -2.921955000 | 0.346329000  |  |
| 1  | 2.223989000  | 1.155134000  | 1.368833000  |    |              | 2_TS_PBu3_2  |              |  |
| 1  | 2.961248000  | -1.086400000 | 1.412142000  | 6  | -1.892207000 | -0.220136000 | 2.399254000  |  |
| 1  | 1.757383000  | -2.373702000 | 1.363097000  | 6  | -0.734522000 | -0.526318000 | 1.853129000  |  |
| 1  | 4.443903000  | -2.415915000 | -0.082530000 | 6  | 0.533170000  | -0.977610000 | 2.005101000  |  |
| 1  | 4.055145000  | -3.327388000 | 1.372911000  | 15 | -1.012679000 | 0.200544000  | -0.536911000 |  |
| 1  | 3.839391000  | -4.756859000 | -0.660682000 | 6  | 1.138704000  | -1.855178000 | 1.044980000  |  |
| 1  | 2.285768000  | -4.560905000 | 0.142315000  | 8  | 0.585900000  | -2.310416000 | 0.049291000  |  |
| 1  | 3.232984000  | -2.969053000 | -2.281860000 | 8  | 2.439674000  | -2.098390000 | 1.315813000  |  |
| 1  | 2.034924000  | -4.259243000 | -2.309896000 | 6  | 3.170524000  | -2.859975000 | 0.351534000  |  |
| 1  | 0.561349000  | -2.942110000 | -0.817407000 | 6  | 3.621943000  | -1.987020000 | -0.797959000 |  |
| 1  | 0.924585000  | -2.021233000 | -2.269770000 | 6  | -2.011149000 | 1.719138000  | -0.782999000 |  |
| 1  | 3.670899000  | 0.948197000  | -0.641308000 | 6  | 0.550807000  | 0.599509000  | -1.395549000 |  |
| 1  | 2.624409000  | 2.069651000  | -1.512155000 | 6  | -1.759839000 | -0.898881000 | -1.795947000 |  |
| 1  | 4.231909000  | 2.689187000  | 1.010967000  | 6  | 1.679944000  | 1.178658000  | -0.548006000 |  |
| 1  | 4.637246000  | 3.221368000  | -0.616447000 | 6  | -1.324915000 | 3.015147000  | -0.358785000 |  |
| 1  | 3.491430000  | 5.031938000  | 0.666141000  | 6  | -3.270434000 | -1.090422000 | -1.690995000 |  |
| 1  | 2.529578000  | 4.533577000  | -0.721663000 | 6  | -1.017260000 | 3.108828000  | 1.129422000  |  |
| 1  | 2.114851000  | 3.578508000  | 2.146301000  | 6  | -0.249249000 | 4.378343000  | 1.460975000  |  |
| 1  | 1.089440000  | 4.726697000  | 1.291554000  | 6  | -3.739438000 | -1.555648000 | -0.317119000 |  |
| 1  | 0.545976000  | 2.985563000  | -0.404721000 | 6  | -3.055113000 | -2.832997000 | 0.145273000  |  |
| 1  | 0.083716000  | 2.468190000  | 1.213439000  | 6  | 2.844752000  | 1.650557000  | -1.407339000 |  |
| 1  | -1.451710000 | -1.624819000 | -0.320485000 | 6  | 3.996349000  | 2.176102000  | -0.564965000 |  |
| 1  | -0.535755000 | -2.369722000 | 0.991664000  | 1  | -2.168808000 | -0.692205000 | 3.336605000  |  |
| 1  | -3.097075000 | -0.755133000 | 1.348752000  | 1  | -2.587349000 | 0.484780000  | 1.962483000  |  |
| 1  | -2.990332000 | -2.513744000 | 1.424020000  | 1  | 1.174576000  | -0.503009000 | 2.738074000  |  |
| 1  | -2.947430000 | -1.515480000 | 3.716960000  | 1  | 4.022477000  | -3.264573000 | 0.895289000  |  |
| 1  | -1.440632000 | -2.350142000 | 3.356224000  | 1  | 2.551975000  | -3.685568000 | -0.000295000 |  |
| 1  | -1.899732000 | 0.657825000  | 3.138733000  | 1  | 4.213488000  | -1.146300000 | -0.429760000 |  |
| 1  | -0.975063000 | -0.148655000 | 4.401514000  | 1  | 4.237395000  | -2.565684000 | -1.487969000 |  |
| 1  | 0.648247000  | -0.962144000 | 2.700915000  | 1  | 2.760867000  | -1.599662000 | -1.343615000 |  |
| 1  | 0.518703000  | 0.792691000  | 2.662911000  | 1  | -2.265011000 | 1.765323000  | -1.848447000 |  |
|    |              | 2_TS_PBu3_1  |              |    |              |              |              |  |
| 6  | 0.087306000  | 1.348958000  | -2.843377000 | 1  | -2.952541000 | 1.592446000  | -0.236034000 |  |
| 6  | 0.796576000  | 0.652960000  | -1.983738000 | 1  | 0.882819000  | -0.338129000 | -1.852483000 |  |
| 6  | 1.899529000  | -0.070447000 | -1.674079000 | 1  | 0.304938000  | 1.284086000  | -2.218385000 |  |
| 15 | -0.696541000 | 0.518433000  | 0.008636000  | 1  | -1.510301000 | -0.466203000 | -2.771799000 |  |
| 6  | 2.734924000  | 0.326507000  | -0.573468000 | 1  | -1.234924000 | -1.853093000 | -1.718643000 |  |
| 8  | 2.571043000  | 1.325008000  | 0.117986000  | 1  | 1.322237000  | 2.016858000  | 0.059132000  |  |
| 8  | 3.729884000  | -0.555724000 | -0.332413000 | 1  | 2.040804000  | 0.424631000  | 0.157832000  |  |
| 6  | 4.538710000  | -0.314245000 | 0.822121000  | 1  | -0.394967000 | 3.173429000  | -0.926043000 |  |
| 6  | 3.847005000  | -0.790467000 | 2.080002000  | 1  | -1.960743000 | 3.860049000  | -0.640684000 |  |
| 6  | -0.731798000 | 1.671523000  | 1.424618000  | 1  | -3.774890000 | -0.154836000 | -1.947634000 |  |
| 6  | -2.454257000 | 0.126040000  | -0.282837000 | 1  | -3.575248000 | -1.823872000 | -2.443973000 |  |
| 6  | -0.033491000 | -1.008491000 | 0.727008000  | 1  | -1.953627000 | 3.069358000  | 1.695305000  |  |
| 6  | -3.243040000 | -0.350741000 | 0.934650000  | 1  | -0.435961000 | 2.236509000  | 1.443999000  |  |
| 6  | -1.579001000 | 2.917841000  | 1.166511000  | 1  | -0.807728000 | 5.265205000  | 1.152216000  |  |
| 6  | -0.313803000 | -2.227003000 | -0.149439000 | 1  | -0.045297000 | 4.463811000  | 2.528807000  |  |
| 6  | -1.239240000 | 3.645464000  | -0.131722000 | 1  | 0.709420000  | 4.392440000  | 0.934329000  |  |
| 6  | 0.222107000  | 4.058954000  | -0.219324000 | 1  | -3.550629000 | -0.760292000 | 0.411792000  |  |
| 6  | 0.631509000  | -3.380525000 | 0.156663000  | 1  | -4.822542000 | -1.699028000 | -0.340694000 |  |
|    |              |              |              | 1  | -1.979647000 | -2.683733000 | 0.266088000  |  |

|    |              |              |              |    |              |               |              |
|----|--------------|--------------|--------------|----|--------------|---------------|--------------|
| 1  | -3.451823000 | -3.170008000 | 1.104552000  | 1  | -4.871129000 | 1.701023000   | -0.548396000 |
| 1  | -3.203376000 | -3.636317000 | -0.581868000 | 1  | -4.391346000 | 1.282334000   | 1.101346000  |
| 1  | 3.185870000  | 0.819488000  | -2.033895000 | 1  | -3.377573000 | 2.361646000   | 0.129512000  |
| 1  | 2.491328000  | 2.429105000  | -2.091222000 |    |              | 3_TS_PMe3_2   |              |
| 1  | 4.369681000  | 1.398441000  | 0.106372000  | 15 | -2.058392000 | -0.008482000  | -0.122888000 |
| 1  | 4.829855000  | 2.516510000  | -1.180564000 | 6  | -1.102920000 | 1.348667000   | -0.833533000 |
| 1  | 3.670875000  | 3.015976000  | 0.053926000  | 6  | -3.751414000 | 0.648992000   | -0.120027000 |
|    |              | 2_TS_PBu3_3  |              | 6  | -1.599330000 | 0.058977000   | 1.622193000  |
| 6  | 0.965764000  | 1.680642000  | 2.377976000  | 1  | -1.243012000 | 2.265135000   | -0.255814000 |
| 6  | -0.079039000 | 1.035427000  | 1.906524000  | 1  | -0.043149000 | 1.089211000   | -0.834389000 |
| 6  | -1.303047000 | 0.491830000  | 2.077312000  | 1  | -4.413915000 | -0.043785000  | 0.399584000  |
| 15 | 0.668542000  | 0.446885000  | -0.451983000 | 1  | -3.786953000 | 1.619860000   | 0.380908000  |
| 6  | -2.329139000 | 0.615616000  | 1.077896000  | 1  | -2.192643000 | -0.657579000  | 2.191424000  |
| 8  | -2.216619000 | 1.213528000  | 0.014060000  | 1  | -0.545544000 | -0.200879000  | 1.734377000  |
| 8  | -3.452653000 | -0.056845000 | 1.406300000  | 1  | -4.106549000 | 0.763079000   | -1.144481000 |
| 6  | -4.499078000 | -0.078634000 | 0.431115000  | 1  | -1.415630000 | 1.523226000   | -1.863686000 |
| 6  | -4.253386000 | -1.157522000 | -0.599119000 | 1  | -1.765021000 | 1.060761000   | 2.025045000  |
| 6  | 2.452037000  | 0.059991000  | -0.529366000 | 6  | -0.793216000 | -1.857512000  | -0.805243000 |
| 6  | -0.100572000 | -1.098816000 | -1.045257000 | 6  | 0.395354000  | -1.667576000  | -0.497655000 |
| 6  | 0.467381000  | 1.508592000  | -1.926855000 | 6  | 1.510024000  | -1.006451000  | 0.079695000  |
| 6  | -0.465024000 | -2.112099000 | 0.046498000  | 8  | 1.844313000  | -1.094710000  | 1.252005000  |
| 6  | 2.858088000  | -1.120543000 | 0.345214000  | 8  | 2.198161000  | -0.279571000  | -0.823262000 |
| 6  | 1.399348000  | 2.718321000  | -1.970687000 | 6  | 3.270796000  | 0.522101000   | -0.308627000 |
| 6  | 4.367716000  | -1.317027000 | 0.391600000  | 6  | 2.738029000  | 1.810227000   | 0.276900000  |
| 6  | 4.764694000  | -2.515586000 | 1.239349000  | 1  | -1.521404000 | -2.506274000  | -1.247149000 |
| 6  | 1.372261000  | 3.566307000  | -0.702507000 | 1  | 3.823998000  | -0.053440000  | 0.432156000  |
| 6  | -0.024023000 | 4.043446000  | -0.333168000 | 1  | 3.916267000  | 0.712364000   | -1.163660000 |
| 6  | -0.439090000 | -3.545650000 | -0.474692000 | 1  | 3.561443000  | 2.415224000   | 0.657877000  |
| 6  | -1.433932000 | -3.779247000 | -1.602848000 | 1  | 2.209686000  | 2.387834000   | -0.482662000 |
| 1  | 0.838597000  | 2.316095000  | 3.248768000  | 1  | 2.054575000  | 1.602208000   | 1.101627000  |
| 1  | 1.952566000  | 1.615837000  | 1.938641000  |    |              | 3_TS_PMe3_3   |              |
| 1  | -1.451902000 | -0.231627000 | 2.869979000  | 15 | -2.273519000 | 0.009618000   | -0.158757000 |
| 1  | -5.410066000 | -0.274326000 | 0.994169000  | 6  | -1.494591000 | 1.636729000   | -0.095966000 |
| 1  | -4.575892000 | 0.903176000  | -0.035195000 | 6  | -4.043323000 | 0.405982000   | -0.065122000 |
| 1  | -4.182321000 | -2.133755000 | -0.117412000 | 6  | -1.921563000 | -0.663460000  | 1.479131000  |
| 1  | -5.075750000 | -1.185843000 | -1.315145000 | 1  | -1.814160000 | 2.183973000   | 0.793439000  |
| 1  | -3.327385000 | -0.963913000 | -1.143273000 | 1  | -0.409600000 | 1.524354000   | -0.070676000 |
| 1  | 2.726060000  | -0.130493000 | -1.574754000 | 1  | -4.622756000 | -0.514152000  | 0.014776000  |
| 1  | 2.997525000  | 0.957184000  | -0.214167000 | 1  | -4.253610000 | 1.036395000   | 0.802660000  |
| 1  | -0.986397000 | -0.806478000 | -1.616056000 | 1  | -2.438630000 | -1.614998000  | 1.608437000  |
| 1  | 0.601194000  | -1.551980000 | -1.759547000 | 1  | -0.848985000 | -0.878366000  | 1.578652000  |
| 1  | 0.634695000  | 0.878528000  | -2.807813000 | 1  | -4.352125000 | 0.930656000   | -0.969665000 |
| 1  | -0.579999000 | 1.817985000  | -1.940690000 | 1  | -1.761972000 | 2.209906000   | -0.984403000 |
| 1  | 0.221754000  | -2.020151000 | 0.892832000  | 1  | -2.245338000 | 0.285000000   | 2.259764000  |
| 1  | -1.461866000 | -1.886781000 | 0.438702000  | 6  | -0.722290000 | -1.196739000  | -1.426404000 |
| 1  | 2.478142000  | -0.975832000 | 1.364477000  | 6  | 0.411116000  | -1.026788000  | -0.948398000 |
| 1  | 2.389073000  | -2.036918000 | -0.031198000 | 6  | 1.430017000  | -0.590956000  | -0.063919000 |
| 1  | 2.422481000  | 2.380285000  | -2.156751000 | 8  | 1.736443000  | -1.150827000  | 0.978901000  |
| 1  | 1.117647000  | 3.340495000  | -2.825760000 | 8  | 2.059134000  | 0.513233000   | -0.512353000 |
| 1  | 4.743327000  | -1.439232000 | -0.628933000 | 6  | 3.158800000  | 0.990319000   | 0.276648000  |
| 1  | 4.832549000  | -0.408359000 | 0.786010000  | 6  | 4.420600000  | 0.217390000   | -0.029341000 |
| 1  | 4.326612000  | -3.433765000 | 0.841495000  | 1  | -1.327743000 | -1.668883000  | -2.172733000 |
| 1  | 5.846785000  | -2.648399000 | 1.271931000  | 1  | 3.262374000  | 2.039152000   | 0.005319000  |
| 1  | 4.410279000  | -2.398514000 | 2.265916000  | 1  | 2.897571000  | 0.922046000   | 1.332125000  |
| 1  | 1.784704000  | 2.983335000  | 0.128741000  | 1  | 5.252723000  | 0.626186000   | 0.544972000  |
| 1  | 2.038015000  | 4.422770000  | -0.834876000 | 1  | 4.301910000  | -0.832734000  | 0.235818000  |
| 1  | -0.471512000 | 4.606880000  | -1.156828000 | 1  | 4.665923000  | 0.889506000   | -1.089280000 |
| 1  | -0.681994000 | 3.201763000  | -0.105875000 |    |              | 3_TS_PPhMe2_1 |              |
| 1  | -0.000889000 | 4.692665000  | 0.543929000  | 15 | -0.725235000 | -0.258647000  | 0.133709000  |
| 1  | 0.574767000  | -3.771192000 | -0.824559000 | 6  | 2.494183000  | 0.086306000   | 0.013490000  |
| 1  | -0.648321000 | -4.234087000 | 0.347565000  | 6  | 0.372356000  | -1.294207000  | -1.303295000 |
| 1  | -1.410569000 | -4.813524000 | -1.948646000 | 6  | 3.386176000  | -0.979491000  | -0.151841000 |
| 1  | -2.451758000 | -3.559655000 | -1.271272000 | 6  | 4.755294000  | -0.756772000  | -0.179413000 |
| 1  | -1.219842000 | -3.139205000 | -2.461445000 | 6  | 5.256946000  | 0.532630000   | -0.028783000 |
|    |              | 3_TS_PMe3_1  |              | 6  | 4.380051000  | 1.595939000   | 0.148376000  |
| 15 | 2.196639000  | 0.158225000  | 0.162847000  | 6  | 3.007580000  | 1.376459000   | 0.170251000  |
| 6  | 1.181438000  | 1.630976000  | -0.079934000 | 1  | 3.007345000  | -1.989592000  | -0.258997000 |
| 6  | 3.886898000  | 0.810893000  | 0.038617000  | 1  | 5.432430000  | -1.590200000  | -0.316592000 |
| 6  | 1.990863000  | -0.729032000 | -1.396295000 | 1  | 6.325064000  | 0.706213000   | -0.048604000 |
| 1  | 1.435580000  | 2.123756000  | -1.020832000 | 1  | 4.763074000  | 2.601786000   | 0.265279000  |
| 1  | 0.126649000  | 1.352872000  | -0.100717000 | 1  | 2.337773000  | 2.216612000   | 0.304775000  |
| 1  | 4.601104000  | -0.012767000 | 0.057144000  | 6  | -0.783585000 | -1.146623000  | 1.667576000  |
| 1  | 4.016193000  | 1.373977000  | -0.889256000 | 6  | -1.929532000 | -1.109086000  | 1.189817000  |
| 1  | 2.651490000  | -1.596650000 | -1.418303000 | 6  | -2.961559000 | -0.895392000  | 0.240208000  |
| 1  | 0.960763000  | -1.078016000 | -1.484650000 | 8  | -3.285991000 | -1.685786000  | -0.633892000 |
| 1  | 4.093687000  | 1.466073000  | 0.885180000  | 8  | -3.587219000 | 0.282866000   | 0.417397000  |
| 1  | 1.338014000  | 2.390470000  | 0.743151000  | 6  | -4.663827000 | 0.563711000   | -0.487589000 |
| 1  | 2.223484000  | -0.080780000 | -2.244119000 | 6  | -5.211032000 | 1.922120000   | -0.131707000 |
| 6  | 0.818645000  | -1.133576000 | 1.540016000  | 1  | -0.157382000 | -1.419511000  | 2.492860000  |
| 6  | -0.318284000 | -1.185253000 | 1.042895000  | 1  | -5.420949000 | -0.215470000  | -0.389106000 |
| 6  | -1.367249000 | -0.988738000 | 0.108968000  | 1  | -4.285090000 | 0.536088000   | -1.510332000 |
| 8  | -1.568509000 | -1.682252000 | -0.877481000 | 1  | -6.036621000 | 2.171768000   | -0.797976000 |
| 8  | -2.164857000 | 0.044327000  | 0.439178000  | 1  | -4.441994000 | 2.688052000   | -0.234370000 |
| 6  | -3.268658000 | 0.290884000  | -0.442186000 | 1  | -5.580245000 | 1.933842000   | 0.893796000  |
| 6  | -4.020008000 | 1.481423000  | 0.096016000  | 1  | 0.692467000  | -0.806972000  | -2.225587000 |
| 1  | 1.472940000  | -1.432928000 | 2.332977000  | 1  | 0.870315000  | -2.258900000  | -1.210443000 |
| 1  | -2.887248000 | 0.474987000  | -1.447630000 | 1  | -0.704201000 | -1.471038000  | -1.341873000 |
| 1  | -3.897127000 | -0.600015000 | -0.480261000 | 6  | -0.084140000 | 1.298203000   | -0.281247000 |

|    |              |               |              |    |               |               |              |
|----|--------------|---------------|--------------|----|---------------|---------------|--------------|
| 1  | 0.051324000  | 2.030833000   | 0.513756000  | 6  | -0.460810000  | 1.341611000   | -0.942609000 |
| 1  | 0.293714000  | 1.701844000   | -1.222025000 | 6  | -1.285527000  | 2.440281000   | -0.746304000 |
| 1  | -1.153343000 | 1.104921000   | -0.383293000 | 6  | -1.730165000  | 2.753002000   | 0.534500000  |
|    |              | 3_TS_PPhMe2_2 |              |    |               |               |              |
| 15 | 0.772132000  | -0.143260000  | 0.139805000  | 6  | -1.346430000  | 1.967280000   | 1.615209000  |
| 6  | 2.563783000  | 0.049758000   | 0.016602000  | 6  | -0.509232000  | 0.873907000   | 1.420257000  |
| 6  | 0.341630000  | -1.201804000  | -1.258687000 | 1  | 0.338107000   | -2.455505000  | -2.322410000 |
| 6  | 3.363682000  | -1.092807000  | -0.098741000 | 1  | -4.910484000  | -0.994482000  | 0.512812000  |
| 6  | 4.746645000  | -0.986906000  | -0.128995000 | 1  | -3.797299000  | 0.201446000   | 1.180980000  |
| 6  | 5.354173000  | 0.261422000   | -0.031323000 | 1  | -5.496531000  | 0.576996000   | -1.346732000 |
| 6  | 4.569028000  | 1.400863000   | 0.095349000  | 1  | -5.820162000  | 1.315741000   | 0.227090000  |
| 6  | 3.182895000  | 1.298042000   | 0.119854000  | 1  | -4.376119000  | 1.778711000   | -0.684510000 |
| 1  | 2.900802000  | -2.070706000  | -0.165932000 | 1  | -0.174634000  | -2.138505000  | 1.414054000  |
| 1  | 5.351535000  | -1.879335000  | -0.226975000 | 1  | 1.392211000   | -2.863788000  | 1.051449000  |
| 1  | 6.433098000  | 0.344037000   | -0.053201000 | 1  | 1.308525000   | -1.469844000  | 2.151560000  |
| 1  | 5.034645000  | 2.375318000   | 0.170879000  | 1  | 3.514452000   | -1.932563000  | 0.898983000  |
| 1  | 2.585879000  | 2.196504000   | 0.213307000  | 1  | 5.831295000   | -1.119525000  | 0.883561000  |
| 6  | -0.812672000 | -0.841011000  | 1.692946000  | 1  | 6.377534000   | 1.079274000   | -0.118283000 |
| 6  | -1.946815000 | -0.751479000  | 1.194405000  | 1  | 4.573365000   | 2.459295000   | -1.109160000 |
| 6  | -2.959409000 | -0.530774000  | 0.226131000  | 1  | 2.252087000   | 1.652569000   | -1.104118000 |
| 8  | -3.326354000 | -1.353395000  | -0.600317000 | 1  | -0.139811000  | 1.075024000   | -1.943903000 |
| 8  | -3.503763000 | 0.697453000   | 0.326571000  | 1  | -1.594308000  | 3.041818000   | -1.591587000 |
| 6  | -4.592420000 | 0.990888000   | -0.561835000 | 1  | -2.382825000  | 3.603066000   | 0.688395000  |
| 6  | -5.890918000 | 0.430286000   | -0.030234000 | 1  | -1.699057000  | 2.202958000   | 2.611167000  |
| 1  | -0.218436000 | -1.108887000  | 2.543173000  | 1  | -0.217391000  | 0.268152000   | 2.269304000  |
| 1  | -4.363660000 | 0.593755000   | -1.550218000 |    |               | 3_TS_PPh2Me_2 |              |
| 1  | -4.623111000 | 2.077353000   | -0.615475000 | 6  | 1.081366000   | -0.202933000  | 2.129713000  |
| 1  | -6.710929000 | 0.703619000   | -0.695204000 | 6  | 2.257884000   | -0.183457000  | 1.723771000  |
| 1  | -6.103645000 | 0.831141000   | 0.961144000  | 6  | 3.287484000   | -0.138680000  | 0.749565000  |
| 1  | -5.844109000 | -0.656597000  | 0.030331000  | 8  | 3.677944000   | 0.882673000   | 0.200662000  |
| 1  | 0.706203000  | -0.779235000  | -2.196209000 | 8  | 3.822925000   | -1.349113000  | 0.508049000  |
| 1  | 0.757961000  | -2.199729000  | -1.123955000 | 6  | 4.843438000   | -1.410089000  | -0.498664000 |
| 1  | -0.745381000 | -1.291840000  | -1.300714000 | 6  | 4.238537000   | -1.451633000  | -1.883201000 |
| 6  | 0.095192000  | 1.458432000   | -0.336558000 | 15 | -0.2454152000 | -0.2454152000 | 0.377049000  |
| 1  | 0.292666000  | 2.206078000   | 0.431119000  | 6  | 0.657749000   | -0.669837000  | -0.970549000 |
| 1  | 0.503278000  | 1.794527000   | -1.291147000 | 6  | -1.971346000  | -1.153736000  | 0.083187000  |
| 1  | -0.986598000 | 1.350987000   | -0.431511000 | 6  | -0.870882000  | -0.508029000  | 1.039778000  |
|    |              | 3_TS_PPhMe2_3 |              |    |               |               |              |
| 15 | -0.618360000 | -0.286764000  | -0.166559000 | 6  | -2.519059000  | -1.881770000  | 1.138467000  |
| 6  | -2.392220000 | 0.024409000   | -0.026042000 | 6  | -3.680337000  | -2.625226000  | 0.952372000  |
| 6  | -0.129053000 | -0.854264000  | 1.476917000  | 6  | -4.297341000  | -2.643972000  | -0.291345000 |
| 6  | -3.217356000 | -0.949911000  | 0.546901000  | 6  | -3.757571000  | -1.918202000  | -1.350819000 |
| 6  | -4.591764000 | -0.767214000  | 0.603319000  | 6  | -2.600796000  | -1.175680000  | -1.165263000 |
| 6  | -5.166141000 | 0.386015000   | 0.077646000  | 6  | 0.180062000   | 2.425528000   | -0.081257000 |
| 6  | -4.356391000 | 1.354426000   | -0.503682000 | 6  | -0.083829000  | 3.774151000   | -0.273236000 |
| 6  | -2.979048000 | 1.176359000   | -0.556985000 | 6  | -1.397971000  | 4.228502000   | -0.331089000 |
| 1  | -2.783268000 | -1.856540000  | 0.952199000  | 6  | -2.445966000  | 3.326959000   | -0.191769000 |
| 1  | -5.215792000 | -1.526317000  | 1.057551000  | 6  | -2.186290000  | 1.973821000   | -0.005783000 |
| 1  | -6.238213000 | 0.528012000   | 0.120934000  | 1  | 0.428701000   | -0.168247000  | 2.978909000  |
| 1  | -4.795888000 | 2.254827000   | -0.913805000 | 1  | 5.510906000   | -0.556998000  | -0.382322000 |
| 1  | -2.362121000 | 1.942469000   | -1.009933000 | 1  | 5.395125000   | -2.322622000  | -0.281616000 |
| 6  | 0.841848000  | -1.523168000  | -1.499144000 | 1  | 5.028207000   | -1.559445000  | -2.627709000 |
| 6  | 2.010182000  | -1.335598000  | -1.120075000 | 1  | 3.558308000   | -2.298943000  | -1.979404000 |
| 6  | 3.062396000  | -0.842783000  | -0.305454000 | 1  | 3.691279000   | -0.532642000  | -2.093330000 |
| 8  | 3.447038000  | -1.365667000  | 0.729985000  | 1  | 1.449622000   | 0.074033000   | -1.056934000 |
| 8  | 3.626519000  | 0.269070000   | -0.816735000 | 1  | 1.106232000   | -1.639944000  | -0.750490000 |
| 6  | 4.629456000  | 0.902351000   | -0.009283000 | 1  | 0.124945000   | -0.719115000  | -1.920176000 |
| 6  | 3.990102000  | 1.758536000   | 1.060087000  | 1  | -2.031778000  | -1.868931000  | 2.106536000  |
| 1  | 0.182137000  | -2.016273000  | -2.184199000 | 1  | -4.098488000  | -3.188669000  | 1.776330000  |
| 1  | 5.211266000  | 1.504657000   | -0.703990000 | 1  | -5.199902000  | -3.223007000  | -0.439148000 |
| 1  | 5.274110000  | 0.138953000   | 0.424055000  | 1  | -4.241034000  | -1.930911000  | -2.319186000 |
| 1  | 4.761304000  | 2.245217000   | 1.658048000  | 1  | -2.189663000  | -0.601912000  | -1.988442000 |
| 1  | 3.375879000  | 1.147997000   | 1.723572000  | 1  | 1.209503000   | 2.086729000   | -0.013668000 |
| 1  | 3.365445000  | 2.531434000   | 0.610449000  | 1  | 0.737821000   | 4.472030000   | -0.371186000 |
| 1  | -0.441883000 | -0.144494000  | 2.244374000  | 1  | -1.602555000  | 5.281086000   | -0.478652000 |
| 1  | -0.557922000 | -1.832799000  | 1.690268000  | 1  | -3.470505000  | 3.674502000   | -0.229947000 |
| 1  | 0.958169000  | -0.951381000  | 1.495698000  | 1  | -3.012168000  | 1.281408000   | 0.101752000  |
| 6  | 0.135356000  | 1.349256000   | -0.263567000 |    |               | 3_TS_PPh2Me_3 |              |
| 1  | -0.077927000 | 1.820934000   | -1.222260000 | 6  | -0.419294000  | -1.939002000  | -1.591043000 |
| 1  | -0.209346000 | 1.992209000   | 0.548121000  | 6  | -1.587173000  | -1.791435000  | -1.178522000 |
| 1  | 1.216784000  | 1.224845000   | -0.182531000 | 6  | -2.550065000  | -1.294479000  | -0.256057000 |
|    |              | 3_TS_PPh2Me_1 |              |    |               |               |              |
| 6  | -0.323162000 | -2.048616000  | -1.582740000 | 8  | -2.795678000  | -1.803908000  | -1.828797000 |
| 6  | -1.490487000 | -2.005208000  | -1.145730000 | 8  | -3.201581000  | -0.215839000  | -0.721513000 |
| 6  | -2.475897000 | -1.607461000  | -0.199572000 | 8  | -4.206045000  | -0.348016000  | 0.132302000  |
| 8  | -2.653176000 | -2.143684000  | 0.885719000  | 6  | -5.514613000  | -0.395968000  | -0.003753000 |
| 8  | -3.244324000 | -0.598471000  | -0.639649000 | 15 | 0.994191000   | -0.830359000  | -0.183829000 |
| 6  | -4.266279000 | -0.151111000  | 0.260014000  | 6  | 0.733669000   | -1.863038000  | 1.271778000  |
| 6  | -5.033850000 | 0.946369000   | -0.431323000 | 6  | 2.726260000   | -0.311314000  | -0.064640000 |
| 15 | 1.024886000  | -0.847983000  | -0.187527000 | 6  | 0.0622734000  | 0.0622734000  | 0.096426000  |
| 6  | 0.882894000  | -1.921547000  | 1.254994000  | 6  | 3.673566000   | -1.144623000  | 0.537163000  |
| 6  | 2.712500000  | -0.195060000  | -0.095363000 | 6  | 5.017297000   | -0.790228000  | 0.548872000  |
| 6  | -0.053316000 | 0.559445000   | 0.140516000  | 6  | 5.433572000   | 0.396367000   | -0.042490000 |
| 6  | 3.737406000  | -0.969940000  | 0.455517000  | 6  | 4.498081000   | 1.228059000   | -0.650185000 |
| 6  | 5.049254000  | -0.511697000  | 0.446588000  | 6  | 3.156209000   | 0.875227000   | -0.666886000 |
| 6  | 5.355921000  | 0.722066000   | -0.114804000 | 6  | -0.286038000  | 1.463225000   | -1.005387000 |
| 6  | 4.342819000  | 1.496194000   | -0.671879000 | 6  | -1.037311000  | 2.619477000   | -0.846994000 |
| 6  | 3.032319000  | 1.039842000   | -0.667988000 | 6  | -1.507139000  | 2.972804000   | 0.413782000  |
|    |              |               |              | 6  | -1.221405000  | 2.170537000   | 1.512694000  |
|    |              |               |              | 6  | -0.457378000  | 1.019383000   | 1.356149000  |
|    |              |               |              | 1  | 0.219822000   | -2.408504000  | -2.312864000 |

|    |              |               |              |    |               |              |              |
|----|--------------|---------------|--------------|----|---------------|--------------|--------------|
| 1  | -3.846498000 | 0.336834000   | 1.161435000  | 1  | -2.755057000  | -2.261215000 | 3.198907000  |
| 1  | -4.303030000 | 1.381890000   | -0.195380000 | 1  | -2.453086000  | -3.269993000 | 0.957030000  |
| 1  | -5.857155000 | -0.381767000  | -1.038845000 | 1  | -0.891795000  | -2.238497000 | -0.659092000 |
| 1  | -5.403376000 | -1.4311191000 | 0.317245000  | 1  | 3.085773000   | -0.190328000 | -2.293533000 |
| 1  | -6.275853000 | 0.078256000   | 0.616839000  | 1  | 5.147454000   | -1.548238000 | -2.297891000 |
| 1  | -0.341219000 | -1.996981000  | 1.404297000  | 1  | 5.548890000   | -3.196098000 | -0.492296000 |
| 1  | 1.175653000  | -2.844480000  | 1.098361000  | 1  | 3.889019000   | -3.467341000 | 1.322449000  |
| 1  | 1.167975000  | -1.427974000  | 2.172455000  | 1  | 1.841561000   | -2.095038000 | 1.346951000  |
| 1  | 3.366154000  | -2.071970000  | 1.004310000  | 1  | 3.418256000   | 1.195892000  | 0.348867000  |
| 1  | 5.738344000  | -1.442435000  | 1.025017000  | 1  | 3.961461000   | 3.489987000  | 1.056486000  |
| 1  | 6.479922000  | 0.672626000   | -0.030037000 | 1  | 2.190211000   | 5.215999000  | 1.158243000  |
| 1  | 4.814011000  | 2.155206000   | -1.111135000 | 1  | -0.138346000  | 4.631144000  | 0.543668000  |
| 1  | 2.437438000  | 1.531945000   | -1.142635000 | 1  | -0.688930000  | 2.340921000  | -0.186668000 |
| 1  | 0.052026000  | 1.165656000   | -1.992365000 | 6  | -0.557967000  | 0.343448000  | -2.355258000 |
| 1  | -1.269285000 | 3.234839000   | -1.706655000 | 6  | -1.766457000  | 0.471628000  | -2.054584000 |
| 1  | -2.102417000 | 3.868483000   | 0.538270000  | 6  | -2.840283000  | 0.432718000  | -1.123562000 |
| 1  | -1.594162000 | 2.438768000   | 2.492995000  | 8  | -3.082801000  | 1.361257000  | -0.365106000 |
| 1  | -0.242709000 | 0.400478000   | 2.218611000  | 8  | -3.606833000  | -0.669972000 | -1.196921000 |
|    |              | 3_TS_PPh3_1   |              | 6  | -4.698762000  | -0.753012000 | -0.271776000 |
| 15 | 0.828685000  | -0.030383000  | -0.568793000 | 6  | -5.912763000  | -0.021838000 | -0.797046000 |
| 6  | -0.404345000 | -0.613014000  | 0.601656000  | 1  | 0.161449000   | 0.440279000  | -3.145096000 |
| 6  | 2.227501000  | -1.159088000  | -0.428042000 | 1  | -4.380908000  | -0.354111000 | 0.691857000  |
| 6  | 1.412459000  | 1.555886000   | 0.054503000  | 1  | -4.895977000  | -1.818644000 | -0.164253000 |
| 6  | -0.662855000 | 0.000390000   | 1.827007000  | 1  | -6.744091000  | -0.136911000 | -0.100468000 |
| 6  | -1.622955000 | -0.529367000  | 2.681902000  | 1  | -6.215350000  | -0.420606000 | -1.763483000 |
| 6  | -2.320551000 | -1.677420000  | 2.322848000  | 1  | -5.700871000  | 1.040938000  | -0.909518000 |
| 6  | -2.067755000 | -2.292838000  | 1.100681000  |    |               | 3_TS_PPh3_3  |              |
| 6  | -1.123471000 | -1.754814000  | 0.238017000  | 15 | 0.793745000   | 0.022390000  | -0.569867000 |
| 6  | 3.225708000  | -1.060155000  | -1.403131000 | 6  | 2.342186000   | -0.897526000 | -0.499962000 |
| 6  | 4.329458000  | -1.899829000  | -1.365633000 | 6  | 1.138135000   | 1.632304000  | 0.160682000  |
| 6  | 4.438489000  | -2.858929000  | -0.363061000 | 6  | -0.319453000  | -0.812632000 | 0.566079000  |
| 6  | 3.444837000  | -2.970159000  | 0.602346000  | 6  | 2.590373000   | -1.922483000 | 0.413811000  |
| 6  | 2.343029000  | -2.122542000  | 0.574566000  | 6  | 3.801375000   | -2.604956000 | -0.382969000 |
| 6  | 2.698295000  | 1.745841000   | 0.562443000  | 6  | 4.771879000   | -2.267847000 | -0.553014000 |
| 6  | 3.097449000  | 3.003231000   | 1.001560000  | 6  | 4.530496000   | -1.246975000 | -1.467669000 |
| 6  | 2.216466000  | 4.076153000   | 0.944391000  | 6  | 3.318821000   | -0.571777000 | -1.447319000 |
| 6  | 0.930600000  | 3.891469000   | 0.444986000  | 6  | 0.097818000   | 2.568573000  | 0.174514000  |
| 6  | 0.530739000  | 2.641415000   | -0.005565000 | 6  | 0.300895000   | 3.829577000  | 0.716709000  |
| 1  | -0.115814000 | 0.889448000   | 2.115933000  | 6  | 1.545181000   | 4.175030000  | 1.235827000  |
| 1  | -1.821349000 | -0.047092000  | 3.630336000  | 6  | 2.582963000   | 3.251256000  | 1.219018000  |
| 1  | -3.064923000 | -2.089480000  | 2.992388000  | 6  | 2.381900000   | 1.982118000  | 0.627653000  |
| 1  | -2.613266000 | -3.183224000  | 0.815637000  | 6  | -0.529346000  | -0.395448000 | 1.880381000  |
| 1  | -0.939365000 | -2.218845000  | -0.725408000 | 6  | -1.316045000  | -1.159212000 | 2.735522000  |
| 1  | 3.135894000  | -0.318331000  | -2.189981000 | 6  | -1.889252000  | -2.342687000 | 2.284970000  |
| 1  | 5.099415000  | -1.812072000  | -2.121216000 | 6  | -1.697124000  | -2.755144000 | 0.969966000  |
| 1  | 5.295096000  | -3.520075000  | -0.337373000 | 6  | -0.9826457000 | -1.986483000 | 0.109328000  |
| 1  | 3.527997000  | -3.715038000  | 1.383382000  | 1  | 1.842003000   | -2.186604000 | 1.151149000  |
| 1  | 1.576626000  | -2.209880000  | 1.335007000  | 1  | 3.986857000   | -3.398571000 | 1.095320000  |
| 1  | 3.389886000  | 0.914422000   | 0.619871000  | 1  | 5.713469000   | -2.801194000 | -0.572811000 |
| 1  | 4.097254000  | 3.140622000   | 1.393083000  | 1  | 5.282238000   | -0.983523000 | -2.200336000 |
| 1  | 2.529567000  | 5.053761000   | 1.287839000  | 1  | 3.126655000   | 0.217960000  | -2.165986000 |
| 1  | 0.239235000  | 4.723135000   | 0.400864000  | 1  | -0.874133000  | 2.305846000  | -0.231266000 |
| 1  | -0.473554000 | 2.502896000   | -0.393264000 | 1  | -0.511763000  | 4.544482000  | 0.728623000  |
| 6  | -0.471062000 | 0.387545000   | -2.453925000 | 1  | 1.703991000   | 5.161625000  | 1.651887000  |
| 6  | -1.665345000 | 0.634817000   | -2.193382000 | 1  | 3.551265000   | 3.513974000  | 1.625414000  |
| 6  | -2.729769000 | 0.867381000   | -1.279856000 | 1  | 3.194498000   | 1.266183000  | 0.689298000  |
| 8  | -2.877378000 | 1.900210000   | -0.641005000 | 1  | -0.068073000  | 0.515994000  | 2.240919000  |
| 8  | -3.605954000 | -0.148442000  | -1.221138000 | 1  | -1.472525000  | -0.833464000 | 3.755767000  |
| 6  | -4.668362000 | 0.000663000   | -0.271097000 | 1  | -2.496009000  | -2.948640000 | 2.954836000  |
| 6  | -5.502032000 | -1.253829000  | -0.319951000 | 1  | -2.156295000  | -3.668067000 | 0.613176000  |
| 1  | 0.272302000  | 0.316394000   | -3.223728000 | 1  | -0.779481000  | -2.299934000 | -0.918878000 |
| 1  | -5.254729000 | 0.884058000   | -0.527760000 | 6  | -0.495370000  | 0.369280000  | -2.473764000 |
| 1  | -4.235866000 | 0.160223000   | 0.718969000  | 6  | -1.715908000  | 0.492471000  | -2.257758000 |
| 1  | -6.325650000 | -1.176096000  | 0.389818000  | 6  | -2.883805000  | 0.635393000  | -1.465763000 |
| 1  | -4.902792000 | -2.126910000  | -0.058719000 | 8  | -3.166378000  | 1.650655000  | -0.842557000 |
| 1  | -5.918751000 | -1.403158000  | -1.316214000 | 8  | -3.698538000  | -0.433755000 | -1.522666000 |
|    |              | 3_TS_PPh3_2   |              | 6  | -4.932149000  | -0.327142000 | -0.797826000 |
| 15 | 0.847769000  | -0.022527000  | -0.550575000 | 6  | -4.743357000  | -0.684020000 | 0.658193000  |
| 6  | -0.281684000 | -0.673948000  | 0.683490000  | 1  | 0.279154000   | 0.394409000  | -3.215520000 |
| 6  | 2.330349000  | -1.044462000  | -0.467834000 | 1  | -5.609902000  | -1.021769000 | -1.290669000 |
| 6  | 1.329862000  | 1.613457000   | 0.026712000  | 1  | -5.319882000  | 0.684507000  | -0.909952000 |
| 6  | -0.453888000 | -0.110065000  | 1.947901000  | 1  | -5.679012000  | -0.537125000 | 1.199415000  |
| 6  | -1.344183000 | -0.681130000  | 2.848635000  | 1  | -3.978156000  | -0.050713000 | 1.110289000  |
| 6  | -2.060892000 | -1.819822000  | 2.495149000  | 1  | -4.444290000  | -1.726439000 | 0.763825000  |
| 6  | -1.890981000 | -2.388326000  | 1.237295000  |    |               | 3_TS_Pani3_1 |              |
| 6  | -1.010729000 | -1.812212000  | 0.331332000  | 6  | -0.402981000  | 0.099078000  | 2.906024000  |
| 6  | 3.267079000  | -0.904016000  | -1.496968000 | 6  | -1.618345000  | -0.178946000 | 2.903225000  |
| 6  | 4.425289000  | -1.667972000  | -1.500680000 | 6  | -2.816816000  | -0.621705000 | 2.277278000  |
| 6  | 4.649724000  | -2.593631000  | -0.485972000 | 6  | -3.358652000  | -1.700677000 | 2.453909000  |
| 6  | 3.716763000  | -2.747405000  | 0.532722000  | 8  | -3.334585000  | 0.327287000  | 1.471966000  |
| 6  | 2.561073000  | -1.974882000  | 0.546240000  | 6  | -4.498442000  | -0.040766000 | 0.723356000  |
| 6  | 2.637470000  | 1.945698000   | 0.381092000  | 6  | -4.790190000  | 1.090589000  | -0.229337000 |
| 6  | 2.943931000  | 3.241181000   | 0.783559000  | 15 | 0.637382000   | -0.037979000 | 0.813671000  |
| 6  | 1.949112000  | 4.209055000   | 0.842684000  | 6  | 0.605559000   | 1.643109000  | 0.172558000  |
| 6  | 0.641180000  | 3.881718000   | 0.495872000  | 6  | 2.256051000   | -0.693378000 | 0.377886000  |
| 6  | 0.332134000  | 2.594349000   | 0.082021000  | 6  | -0.556514000  | -0.951215000 | -0.160789000 |
| 1  | 0.104547000  | 0.774341000   | 2.229023000  | 6  | 1.672018000   | 2.224295000  | -0.521392000 |
| 1  | -1.475944000 | -0.238584000  | 3.827517000  | 6  | 1.592669000   | 3.527463000  | -0.977976000 |



|    |              |              |              |    |              |               |              |
|----|--------------|--------------|--------------|----|--------------|---------------|--------------|
| 6  | 0.438145000  | 4.282287000  | -0.758324000 | 1  | -1.474355000 | 1.975895000   | 0.882179000  |
| 6  | -0.637071000 | 3.716089000  | -0.071479000 | 1  | 1.707812000  | -2.014985000  | -1.100997000 |
| 6  | -0.539981000 | 2.410871000  | 0.392871000  | 1  | 4.025544000  | -2.791327000  | -1.456992000 |
| 6  | 2.487517000  | -1.491921000 | -0.748123000 | 1  | 5.409776000  | -0.044462000  | 1.530888000  |
| 6  | 3.757697000  | -1.955646000 | -1.034088000 | 1  | 3.112619000  | 0.710283000   | 1.900040000  |
| 6  | 4.832295000  | -1.626205000 | -0.202802000 | 1  | -0.770254000 | -2.427187000  | 1.376657000  |
| 6  | 4.617726000  | -0.834551000 | 0.925835000  | 1  | -2.163223000 | -3.955110000  | 0.061493000  |
| 6  | 3.333653000  | -0.385096000 | 1.207518000  | 1  | -1.930251000 | -1.281656000  | -3.286502000 |
| 6  | -0.931093000 | -2.213308000 | 0.294932000  | 1  | -0.520553000 | 0.258044000   | -1.957695000 |
| 6  | -1.842235000 | -2.995503000 | -0.404411000 | 1  | -0.858325000 | 7.193952000   | -1.831366000 |
| 6  | -2.408396000 | -2.498961000 | -1.577913000 | 1  | -1.895335000 | 5.753825000   | -1.740789000 |
| 6  | -2.044439000 | -1.231058000 | -2.044628000 | 1  | -1.181150000 | 6.436053000   | -0.256705000 |
| 6  | -1.130041000 | -0.469082000 | -1.343342000 | 1  | -3.987985000 | -5.155455000  | -2.769039000 |
| 8  | 0.444142000  | 5.542956000  | -1.238908000 | 1  | -2.597552000 | -5.369385000  | -1.682875000 |
| 8  | -3.320049000 | -3.166231000 | -2.313926000 | 1  | -4.048613000 | -4.502206000  | -1.116487000 |
| 8  | 6.037202000  | -2.115526000 | -0.559415000 | 1  | 7.083724000  | -1.608383000  | 1.528129000  |
| 6  | -0.708005000 | 6.339164000  | -1.035324000 | 1  | 8.077634000  | -1.944053000  | 0.093900000  |
| 6  | -3.748843000 | -4.434542000 | -1.853472000 | 1  | 7.300860000  | -0.356340000  | 0.277494000  |
| 6  | 7.154152000  | -1.791106000 | 0.247182000  |    |              |               |              |
| 1  | 0.416099000  | 0.474001000  | 3.488162000  | 6  | 0.600635000  | 3_TS_Pani3_3  | 0.194038000  |
| 1  | -4.295151000 | -0.972073000 | 0.190709000  | 6  | 1.827083000  | -0.013308000  | -3.054784000 |
| 1  | -5.327323000 | -0.218371000 | 1.410806000  | 6  | 3.065186000  | -0.362750000  | -2.425308000 |
| 1  | -4.992956000 | 2.013761000  | 0.314280000  | 8  | 3.588899000  | -1.464317000  | -2.470374000 |
| 1  | -5.661994000 | 0.849406000  | -0.837463000 | 8  | 3.643721000  | 0.700063000   | -1.825069000 |
| 1  | -3.940189000 | 1.256936000  | -0.894192000 | 6  | 4.840689000  | 0.439373000   | -1.081028000 |
| 1  | 2.572789000  | 1.653017000  | -0.710810000 | 6  | 4.492942000  | -0.104355000  | 0.285674000  |
| 1  | 2.416019000  | 3.981165000  | -1.514710000 | 15 | -0.490875000 | 0.048514000   | -0.964932000 |
| 1  | -1.541050000 | 4.279655000  | 0.111072000  | 6  | -0.416636000 | 1.624494000   | -0.214879000 |
| 1  | -1.380513000 | 1.979078000  | 0.926286000  | 6  | -2.165518000 | -0.545913000  | -0.684449000 |
| 1  | 1.666500000  | -1.750384000 | -1.406255000 | 6  | 0.578344000  | -0.980971000  | 0.040263000  |
| 1  | 3.944408000  | -2.573727000 | -1.902966000 | 6  | -1.485273000 | 2.287244000   | 0.438649000  |
| 1  | 5.432038000  | -0.575131000 | 1.587010000  | 6  | -1.370173000 | 3.563795000   | 0.983979000  |
| 1  | 3.172588000  | 0.223181000  | 2.091290000  | 6  | -0.161333000 | 4.248269000   | 0.883907000  |
| 1  | -0.513247000 | -2.592108000 | 1.221956000  | 6  | 0.923678000  | 3.647770000   | 0.234486000  |
| 1  | -2.119219000 | -3.965650000 | -0.017866000 | 6  | 0.792798000  | 2.388463000   | -0.312881000 |
| 1  | -2.495515000 | -0.864131000 | -2.957889000 | 6  | -2.484855000 | -1.549795000  | 0.224982000  |
| 1  | -0.858660000 | 0.511110000  | -1.717072000 | 6  | -3.793618000 | -2.001649000  | 0.371046000  |
| 1  | -0.500928000 | 7.304097000  | -1.489897000 | 6  | -4.807256000 | -1.437983000  | -0.400803000 |
| 1  | -1.583801000 | 5.895421000  | -1.514394000 | 6  | -4.499377000 | -0.428756000  | -1.320590000 |
| 1  | -0.908781000 | 6.477383000  | 0.029492000  | 6  | -3.196315000 | 0.000412000   | -1.464430000 |
| 1  | -4.483067000 | -4.791402000 | -2.570486000 | 6  | 1.046628000  | -2.104365000  | -0.502877000 |
| 1  | -2.915958000 | -5.139830000 | -1.808175000 | 6  | 1.782986000  | -3.066977000  | 0.262761000  |
| 1  | -4.212783000 | -4.357619000 | -0.867419000 | 6  | 2.080098000  | -2.758973000  | 1.594130000  |
| 1  | 7.030799000  | -2.171956000 | 1.263498000  | 6  | 1.630184000  | -1.559141000  | 2.147811000  |
| 1  | 8.015705000  | -2.267376000 | -0.212557000 | 6  | 0.885785000  | -0.683551000  | 1.366774000  |
| 1  | 7.314468000  | -0.710985000 | 0.281946000  | 8  | 0.049857000  | 5.485364000   | 1.379540000  |
|    |              | 3_TS_Pani3_2 |              | 8  | 2.813458000  | -3.666819000  | 2.267993000  |
| 6  | -0.399718000 | 0.106597000  | 2.942479000  | 8  | -6.103267000 | -1.805352000  | 0.329710000  |
| 6  | -1.628396000 | -0.086079000 | 2.973290000  | 6  | -1.026810000 | 6.136152000   | 2.026773000  |
| 6  | -2.897193000 | -0.396893000 | 2.416360000  | 6  | 3.174136000  | -3.375424000  | 3.605333000  |
| 8  | -3.438090000 | -1.490554000 | 2.448391000  | 6  | -6.456878000 | -2.828510000  | 0.581870000  |
| 8  | -3.480282000 | 0.693862000  | 1.874700000  | 1  | -0.242374000 | 0.243296000   | -3.655434000 |
| 6  | -4.712057000 | 0.478348000  | 1.174063000  | 1  | 5.467268000  | -0.254677000  | -1.639876000 |
| 6  | -4.432277000 | -0.022323000 | -0.224105000 | 1  | 5.348242000  | 1.399770000   | -1.013299000 |
| 15 | 0.583551000  | 0.014738000  | 0.788462000  | 1  | 3.867844000  | 0.605909000   | 0.830303000  |
| 6  | 0.494611000  | 1.665460000  | 0.075266000  | 1  | 5.400247000  | -0.283104000  | 0.864183000  |
| 6  | 2.240088000  | -0.585429000 | 0.422758000  | 1  | 3.950486000  | -1.046074000  | 0.188621000  |
| 6  | -0.536175000 | -0.982685000 | -0.193310000 | 1  | -2.428858000 | 1.763979000   | 0.535418000  |
| 6  | 1.516604000  | 2.242877000  | -0.685310000 | 1  | -2.220770000 | 4.006902000   | 1.482953000  |
| 6  | 1.376904000  | 3.516677000  | -1.205922000 | 1  | 1.855676000  | 4.193950000   | 0.165035000  |
| 6  | 0.205313000  | 4.244331000  | -0.984072000 | 1  | 1.639489000  | 1.936634000   | -0.819839000 |
| 6  | -0.826001000 | 3.680493000  | -0.231538000 | 1  | -1.707728000 | -1.994461000  | 0.835298000  |
| 6  | -0.668853000 | 2.404701000  | 0.294569000  | 1  | -4.007829000 | -2.784159000  | 1.085019000  |
| 6  | 2.513794000  | -1.580979000 | -0.521364000 | 1  | -5.298168000 | -0.005149000  | -1.915624000 |
| 6  | 3.808376000  | -2.021381000 | -0.727727000 | 1  | -2.969132000 | 0.777363000   | -2.186946000 |
| 6  | 4.865298000  | -1.472933000 | 0.002876000  | 1  | 0.831388000  | -2.424347000  | -1.538057000 |
| 6  | 4.609405000  | -0.480588000 | 0.950439000  | 1  | 2.154963000  | -3.994411000  | -0.152894000 |
| 6  | 3.303196000  | -0.056274000 | 1.155909000  | 1  | 1.854049000  | -1.300847000  | 3.172993000  |
| 6  | -1.013608000 | -2.172809000 | 0.351206000  | 1  | 0.534412000  | 0.242847000   | 1.806630000  |
| 6  | -1.801735000 | -3.043745000 | -0.392651000 | 1  | -0.658421000 | 7.110492000   | 2.335951000  |
| 6  | -2.127257000 | -2.715561000 | -1.708239000 | 1  | -1.872275000 | 6.268402000   | 1.347781000  |
| 6  | -1.661410000 | -1.518336000 | -2.264934000 | 1  | -1.353666000 | 5.578400000   | 2.907381000  |
| 6  | -0.878432000 | -0.664395000 | -1.514775000 | 1  | 3.770908000  | -4.213934000  | 3.953573000  |
| 8  | 0.152315000  | 5.478022000  | -1.528158000 | 1  | 3.768861000  | -2.460641000  | 3.660738000  |
| 8  | -2.890700000 | -3.486087000 | -2.507755000 | 1  | 2.290834000  | -3.273520000  | 4.239797000  |
| 8  | 6.095429000  | -1.958151000 | -0.264457000 | 1  | -6.221860000 | -2.539739000  | 1.608935000  |
| 8  | -1.016627000 | 6.248281000  | -1.320265000 | 1  | -7.913820000 | -2.971382000  | 0.485308000  |
| 6  | -3.404147000 | -4.694280000 | -1.977264000 | 1  | -5.944928000 | -3.763461000  | 0.342612000  |
| 6  | 7.192347000  | -1.428644000 | 0.456109000  |    |              |               |              |
| 1  | 0.480488000  | 0.355222000  | 3.501821000  | 15 | -0.676816000 | 3_TS_Pfp3_1   | -0.026662000 |
| 1  | -5.326461000 | -0.224505000 | 1.735463000  | 6  | 0.451539000  | -0.945495000  | -0.297085000 |
| 1  | -5.205234000 | 1.448478000  | 1.161165000  | 6  | -2.324310000 | -0.665426000  | 0.399186000  |
| 1  | -3.814969000 | 0.694506000  | -0.769011000 | 6  | -0.662317000 | -0.1661902000 | 0.125762000  |
| 1  | -5.365969000 | -0.161421000 | -0.770401000 | 6  | 0.961292000  | -0.449742000  | -1.498515000 |
| 1  | -3.906077000 | -0.977491000 | -0.184780000 | 6  | 1.813117000  | -1.223294000  | -2.274583000 |
| 1  | 2.428895000  | 1.691203000  | -0.877306000 | 6  | 2.137808000  | -2.492091000  | -1.827683000 |
| 1  | 2.165124000  | 3.967833000  | -1.795059000 | 6  | 1.656871000  | -3.015341000  | -0.641642000 |
| 1  | -1.741110000 | 4.224268000  | -0.045015000 | 6  | 0.813747000  | -2.226328000  | 0.126683000  |

|    |              |              |              |    |              |              |              |
|----|--------------|--------------|--------------|----|--------------|--------------|--------------|
| 6  | -3.361614000 | -0.279487000 | 1.254907000  | 6  | 1.754931000  | 0.476278000  | -2.460913000 |
| 6  | -4.655124000 | -0.733896000 | 1.052147000  | 6  | 2.953176000  | 0.623386000  | -1.717224000 |
| 6  | -4.887100000 | -1.593169000 | -0.007673000 | 8  | 3.244964000  | 1.633383000  | -1.088545000 |
| 6  | -3.886867000 | -2.007222000 | -0.866676000 | 8  | 3.784894000  | -0.427863000 | -1.831826000 |
| 6  | -2.597989000 | -1.533763000 | -0.658557000 | 6  | 5.076031000  | -0.286669000 | -1.220731000 |
| 6  | -1.748795000 | 2.242012000  | -0.529813000 | 6  | 5.043451000  | -0.653552000 | 0.244528000  |
| 6  | -1.683350000 | 3.553756000  | -0.982595000 | 15 | -0.678093000 | 0.004966000  | -0.711684000 |
| 6  | -0.516389000 | 4.263688000  | -0.776371000 | 6  | 0.534444000  | -0.750106000 | 0.373188000  |
| 6  | 0.583848000  | 3.722215000  | -0.134409000 | 6  | -1.021949000 | 1.631183000  | -0.020224000 |
| 6  | 0.500190000  | 2.417087000  | 0.324217000  | 6  | -2.192072000 | -0.949836000 | -0.501439000 |
| 1  | 0.692283000  | 0.543255000  | -1.836832000 | 6  | 0.843071000  | -0.262556000 | 1.643103000  |
| 1  | 2.219376000  | -0.859502000 | -3.208680000 | 6  | 1.747709000  | -0.934708000 | 2.454722000  |
| 1  | 1.953784000  | -4.006285000 | -0.326908000 | 6  | 2.323534000  | -2.094975000 | 1.972657000  |
| 1  | 0.439336000  | -2.605393000 | 1.071145000  | 6  | 2.044153000  | -2.608479000 | 0.718628000  |
| 1  | -3.155915000 | 0.386110000  | 2.085772000  | 6  | 1.152979000  | -1.917133000 | -0.086152000 |
| 1  | -5.470308000 | -0.442729000 | 1.700330000  | 6  | -2.250838000 | 1.971890000  | 0.546401000  |
| 1  | -4.119317000 | -2.681014000 | -1.680116000 | 6  | -2.471044000 | 3.250970000  | 1.041404000  |
| 1  | -1.805537000 | -1.844206000 | -1.327894000 | 6  | -1.443480000 | 4.171108000  | 0.966323000  |
| 1  | -2.654466000 | 1.672773000  | -0.696656000 | 6  | -0.209414000 | 3.869174000  | 0.417554000  |
| 1  | -2.515828000 | 4.019957000  | -1.491843000 | 6  | -0.006024000 | 2.593020000  | -0.083509000 |
| 1  | 1.476094000  | 4.317427000  | 0.004885000  | 6  | -3.223643000 | -0.729459000 | -1.420610000 |
| 1  | 1.350878000  | 1.975561000  | 0.831661000  | 6  | -4.415690000 | -1.431024000 | -1.332084000 |
| 6  | 0.421262000  | 0.045748000  | 2.780866000  | 6  | -4.549020000 | -2.367150000 | -0.321567000 |
| 6  | 1.638202000  | -0.234088000 | 2.736653000  | 6  | -3.548923000 | -2.622287000 | 0.597462000  |
| 6  | 2.794533000  | -0.658934000 | 2.022980000  | 6  | -2.364778000 | -1.902778000 | 0.503729000  |
| 8  | 3.334961000  | -1.747896000 | 2.121033000  | 9  | 3.211697000  | -2.741149000 | 2.744849000  |
| 8  | 3.268727000  | 0.318854000  | 1.225619000  | 9  | -5.696545000 | -3.058743000 | -0.233685000 |
| 6  | 4.374069000  | -0.027829000 | 0.383147000  | 9  | -1.649845000 | 5.408837000  | 1.446061000  |
| 6  | 4.595272000  | 1.128433000  | -0.558561000 | 1  | -0.261344000 | 0.392501000  | -3.368752000 |
| 1  | -0.371935000 | 0.397971000  | 3.412197000  | 1  | 5.726066000  | -0.956852000 | -1.780350000 |
| 1  | 4.130836000  | -0.945610000 | -0.155829000 | 1  | 5.419749000  | 0.737349000  | -1.361481000 |
| 1  | 5.251339000  | -0.222393000 | 1.002338000  | 1  | 4.785826000  | -1.704501000 | 0.376335000  |
| 1  | 4.833731000  | 2.038407000  | -0.007327000 | 1  | 6.026254000  | -0.484358000 | 0.686653000  |
| 1  | 3.700823000  | 1.308910000  | -1.158529000 | 1  | 4.314585000  | -0.039758000 | 0.775850000  |
| 1  | 5.422983000  | 0.906144000  | -1.231936000 | 1  | 0.373560000  | 0.642140000  | 2.008735000  |
| 9  | -6.135447000 | -2.046098000 | -0.206166000 | 1  | 2.005963000  | -0.572845000 | 3.440588000  |
| 9  | -0.446151000 | 5.530948000  | -1.215409000 | 1  | 2.534995000  | -3.511904000 | 0.383039000  |
| 9  | 2.963511000  | -3.242577000 | -2.574001000 | 1  | 0.930654000  | -2.287423000 | -1.080900000 |
|    |              | 3_TS_PpFp3_2 |              | 1  | -3.046106000 | 1.240142000  | 0.610008000  |
| 15 | 0.704948000  | -0.027786000 | -0.678587000 | 1  | -3.417103000 | 3.532397000  | 1.483592000  |
| 6  | -0.501632000 | -0.682287000 | 0.476520000  | 1  | 0.566116000  | 4.622314000  | 0.382779000  |
| 6  | 2.190544000  | -1.029036000 | -0.483972000 | 1  | 0.956653000  | 2.340838000  | -0.516395000 |
| 6  | 1.131540000  | 1.614519000  | -0.077323000 | 1  | -3.093976000 | 0.001918000  | -2.210754000 |
| 6  | -0.799141000 | -0.088551000 | 1.703393000  | 1  | -5.225203000 | -1.270760000 | -2.031011000 |
| 6  | -1.758977000 | -0.641448000 | 2.539689000  | 1  | -3.701848000 | -3.365111000 | 1.368573000  |
| 6  | -2.402407000 | -1.794376000 | 2.127735000  | 1  | -1.575438000 | -2.087056000 | 1.221681000  |
| 6  | -2.129453000 | -2.416429000 | 0.922932000  |    |              | 3_TS_Pcy3_1  |              |
| 6  | -1.178890000 | -1.842875000 | 0.092498000  | 6  | 0.603407000  | 0.579376000  | 2.486613000  |
| 6  | 3.190611000  | -0.893252000 | -1.452816000 | 6  | 1.823735000  | 0.411083000  | 2.339530000  |
| 6  | 4.358748000  | -1.635321000 | -1.376442000 | 6  | 3.029825000  | -0.000307000 | 1.715337000  |
| 6  | 4.498654000  | -2.526744000 | -0.327214000 | 8  | 3.543851000  | -1.101900000 | 1.837160000  |
| 6  | 3.528372000  | -2.698614000 | 0.641861000  | 8  | 3.585466000  | 0.988717000  | 0.986941000  |
| 6  | 2.368993000  | -1.938621000 | 0.559510000  | 6  | 4.782383000  | 0.662874000  | 0.268495000  |
| 6  | 2.404069000  | 1.950062000  | 0.385919000  | 6  | 4.457771000  | -0.059899000 | -1.018718000 |
| 6  | 2.685791000  | 3.244709000  | 0.803707000  | 15 | -0.684053000 | 0.009954000  | 0.514487000  |
| 6  | 1.675416000  | 4.185372000  | 0.756911000  | 6  | -2.351359000 | -0.763691000 | 0.327595000  |
| 6  | 0.399309000  | 3.889424000  | 0.309969000  | 6  | -0.711490000 | 1.538034000  | -0.494002000 |
| 6  | 0.134522000  | 2.597540000  | -0.115691000 | 6  | 0.472911000  | -1.120252000 | -0.327391000 |
| 1  | -0.285389000 | 0.813092000  | 2.011886000  | 6  | -3.170808000 | -0.580526000 | 1.609585000  |
| 1  | -2.009341000 | -0.194383000 | 3.492058000  | 6  | -4.487256000 | -1.344519000 | 1.532421000  |
| 1  | -2.667417000 | -3.311775000 | 0.642154000  | 6  | -5.293201000 | -0.918018000 | 0.312003000  |
| 1  | -0.967650000 | -2.295079000 | -0.870219000 | 6  | -4.477617000 | -1.110097000 | -0.960335000 |
| 1  | 3.055765000  | -0.196274000 | -2.272549000 | 6  | -3.169343000 | -0.327757000 | -0.889405000 |
| 1  | 5.144667000  | -1.539803000 | -2.113203000 | 6  | -1.480001000 | 2.615765000  | 0.278079000  |
| 1  | 3.685121000  | -3.409432000 | 1.441821000  | 6  | -1.564790000 | 3.908983000  | -0.523152000 |
| 1  | 1.603335000  | -2.057248000 | 1.315870000  | 6  | -0.168440000 | 4.411286000  | -0.867419000 |
| 1  | 3.185862000  | 1.202342000  | 0.427971000  | 6  | 0.611780000  | 3.345144000  | -1.626320000 |
| 1  | 3.666456000  | 3.522949000  | 1.165129000  | 6  | 0.691285000  | 2.045303000  | -0.830876000 |
| 1  | -0.360461000 | 4.659074000  | 0.294810000  | 6  | 0.632869000  | -2.425357000 | 0.456500000  |
| 1  | -0.861477000 | 2.345734000  | -0.465938000 | 6  | 1.685486000  | -3.316658000 | -0.194512000 |
| 6  | -0.593649000 | 0.311669000  | -2.555997000 | 6  | 1.347942000  | -3.592950000 | -1.654674000 |
| 6  | -1.815825000 | 0.392027000  | -2.315105000 | 6  | 1.188933000  | -2.290190000 | -2.429542000 |
| 6  | -2.928523000 | 0.425201000  | -1.431113000 | 6  | 0.120324000  | -1.413191000 | -1.785135000 |
| 8  | -3.200344000 | 1.368702000  | -0.701158000 | 1  | -0.199026000 | 0.906381000  | 3.114767000  |
| 8  | -3.693130000 | -0.677430000 | -1.515223000 | 1  | 5.262107000  | 1.620272000  | 0.074549000  |
| 6  | -4.824749000 | -0.741840000 | -0.636678000 | 1  | 5.431537000  | 0.064036000  | 0.906572000  |
| 6  | -6.013657000 | -0.022561000 | -1.230825000 | 1  | 3.987210000  | -1.020746000 | -0.808506000 |
| 1  | 0.160912000  | 0.395709000  | -3.314001000 | 1  | 3.783073000  | 0.539090000  | -1.633686000 |
| 1  | -4.550106000 | -0.321757000 | 0.331338000  | 1  | 5.371432000  | -0.240262000 | -1.586332000 |
| 1  | -5.026527000 | -1.805104000 | -0.515020000 | 1  | -2.140397000 | 0.221966000  | 0.221966000  |
| 1  | -6.273505000 | -0.448157000 | -2.200495000 | 1  | -1.234789000 | 1.336227000  | -1.436985000 |
| 1  | -5.795746000 | 1.037458000  | -1.357285000 | 1  | 1.443139000  | -0.601988000 | -0.302556000 |
| 1  | -6.874940000 | -0.122101000 | -0.569232000 | 1  | -2.586292000 | -0.907411000 | 2.473485000  |
| 9  | 1.941190000  | 5.438218000  | 1.162382000  | 1  | -3.376743000 | 0.488060000  | 1.749459000  |
| 9  | 5.622357000  | -3.257621000 | -0.250363000 | 1  | -4.269507000 | -2.416412000 | 1.459644000  |
| 9  | -3.338434000 | -2.329491000 | 2.927975000  | 1  | -5.063909000 | -1.195296000 | 2.447677000  |
|    |              | 3_TS_PpFp3_3 |              | 1  | -6.228859000 | -1.478118000 | 0.255849000  |
| 6  | 0.527622000  | 0.352341000  | -2.642742000 | 1  | -5.557242000 | 0.146167000  | 0.409239000  |

|    |              |              |              |    |               |              |              |
|----|--------------|--------------|--------------|----|---------------|--------------|--------------|
| 1  | -4.251021000 | -2.175320000 | -1.085238000 | 1  | -0.833523000  | -1.868993000 | -1.917901000 |
| 1  | -5.051434000 | -0.798546000 | -1.835874000 | 1  | -0.002669000  | -0.374732000 | -2.351543000 |
| 1  | -2.596042000 | -0.458292000 | -1.809730000 |    |               | 3_TS_Pcy3_3  |              |
| 1  | -3.401622000 | 0.740096000  | -0.804900000 | 6  | -0.787348000  | 0.884048000  | -2.094243000 |
| 1  | -2.478907000 | 2.258844000  | 0.544378000  | 6  | -1.979776000  | 0.883378000  | -1.751223000 |
| 1  | -0.947489000 | 2.807686000  | 1.218550000  | 6  | -3.140491000  | 0.701906000  | -0.958288000 |
| 1  | -2.120412000 | 3.720563000  | -1.449239000 | 8  | -3.497944000  | 1.449972000  | -0.058687000 |
| 1  | -2.119266000 | 4.664346000  | 0.037527000  | 8  | -3.847601000  | -0.384054000 | -1.328425000 |
| 1  | -0.224009000 | 5.332277000  | -1.451482000 | 6  | -5.092194000  | -0.603119000 | -0.650520000 |
| 1  | 0.362586000  | 4.649391000  | 0.061358000  | 6  | -6.194597000  | 0.223805000  | -1.270933000 |
| 1  | 0.110143000  | 3.146888000  | -2.580773000 | 15 | 0.706401000   | 0.006744000  | -0.421970000 |
| 1  | 1.617926000  | 3.699659000  | -1.860261000 | 6  | 2.137722000   | -1.157670000 | -0.500344000 |
| 1  | 1.247336000  | 2.215569000  | 0.098166000  | 6  | 1.301296000   | 1.501725000  | 0.452952000  |
| 1  | 1.245700000  | 1.295374000  | -1.401718000 | 6  | -0.498536000  | -0.770153000 | 0.698192000  |
| 1  | 0.904945000  | -2.208186000 | 1.492339000  | 6  | 2.725773000   | -1.198330000 | -1.914925000 |
| 1  | -0.325729000 | -2.957660000 | 0.471586000  | 6  | 3.803282000   | -2.270502000 | -2.028173000 |
| 1  | 2.655353000  | -2.811095000 | -0.133632000 | 6  | 4.900553000   | -2.050871000 | -0.994531000 |
| 1  | 1.778124000  | -4.252057000 | 0.361532000  | 6  | 4.312419000   | -0.418571000 | -0.410475000 |
| 1  | 2.117007000  | -4.219106000 | -2.111855000 | 6  | 3.247945000   | -0.931475000 | 0.527404000  |
| 1  | 0.405965000  | -4.151933000 | -1.706015000 | 6  | 2.144500000   | 2.326777000  | -0.520035000 |
| 1  | 2.142473000  | -1.748175000 | -2.427292000 | 6  | 2.694073000   | 3.581106000  | 0.158859000  |
| 1  | 0.935009000  | -2.491065000 | -3.472616000 | 6  | 1.555452000   | 4.426592000  | 0.715043000  |
| 1  | -0.838915000 | -1.945031000 | -1.812114000 | 6  | 0.703361000   | 3.609342000  | 1.677879000  |
| 1  | -0.009263000 | -0.483067000 | -2.346016000 | 6  | 0.156812000   | 2.352705000  | 1.006526000  |
|    |              | 3_TS_Pcy3_2  |              | 6  | -1.139859000  | -2.005089000 | 0.060467000  |
| 6  | 0.575420000  | 0.496903000  | 2.503790000  | 6  | -2.272891000  | -2.045943000 | 0.945943000  |
| 6  | 1.782740000  | 0.227192000  | 2.396646000  | 6  | -1.760930000  | -2.847932000 | 2.342104000  |
| 6  | 2.936953000  | -0.320929000 | 1.776585000  | 6  | -1.086576000  | -1.636144000 | -2.975350000 |
| 8  | 3.402995000  | -1.426137000 | 2.004575000  | 6  | 0.038725000   | -1.116786000 | 2.085740000  |
| 8  | 3.497948000  | 0.533880000  | 0.899357000  | 1  | -0.060667000  | 1.155028000  | -2.832079000 |
| 6  | 4.608814000  | 0.029206000  | 0.149624000  | 1  | -5.286337000  | -1.669314000 | -0.756931000 |
| 6  | 4.961264000  | 1.069170000  | -0.883092000 | 1  | -4.972155000  | -0.369419000 | 0.407091000  |
| 15 | -0.709973000 | -0.012171000 | 0.518832000  | 1  | -6.303553000  | -0.013835000 | -2.329416000 |
| 6  | -2.387776000 | -0.745750000 | 0.279382000  | 1  | -7.141057000  | 0.014180000  | -0.771292000 |
| 6  | -0.693028000 | 1.557938000  | -0.425426000 | 1  | -5.978907000  | 1.287151000  | -1.168169000 |
| 6  | 0.439313000  | -1.120397000 | -0.359650000 | 1  | 1.691128000   | -2.142132000 | -0.301174000 |
| 6  | -3.229336000 | -0.586478000 | 1.550224000  | 1  | 1.932868000   | 1.196220000  | 1.296669000  |
| 6  | -4.557343000 | -1.323205000 | 1.422335000  | 1  | -1.290178000  | -0.016785000 | 0.812289000  |
| 6  | -5.330301000 | -0.844622000 | 0.199862000  | 1  | 1.929767000   | -1.373001000 | -2.643253000 |
| 6  | -4.492523000 | -1.012340000 | -1.061558000 | 1  | 3.161561000   | -0.218700000 | -2.146879000 |
| 6  | -3.172463000 | -0.256963000 | -0.939454000 | 1  | 3.344236000   | -3.251481000 | -1.858998000 |
| 6  | -1.452226000 | 2.620289000  | 0.376553000  | 1  | 4.219905000   | -2.280737000 | -3.037552000 |
| 6  | -1.493669000 | 3.946636000  | -0.372443000 | 1  | 5.662373000   | -2.829163000 | -1.073464000 |
| 6  | -0.080522000 | 4.431833000  | -0.669855000 | 1  | 5.395907000   | -1.093702000 | -1.195523000 |
| 6  | 0.689845000  | 3.381475000  | -1.460015000 | 1  | 3.856918000   | -2.990616000 | 0.632492000  |
| 6  | 0.725859000  | 2.047479000  | -0.720317000 | 1  | 5.096979000   | -1.852264000 | 1.152264000  |
| 6  | 0.570748000  | -2.468967000 | 0.352230000  | 1  | 2.839614000   | -0.903583000 | 1.539832000  |
| 6  | 1.649778000  | -3.316743000 | -0.314261000 | 1  | 3.717332000   | 0.041865000  | 0.343604000  |
| 6  | 1.360984000  | -3.509003000 | -1.798177000 | 1  | 2.956183000   | 1.729173000  | -0.936072000 |
| 6  | 1.214663000  | -2.164235000 | -2.500138000 | 1  | 1.504458000   | 2.631409000  | -1.360079000 |
| 6  | 0.120343000  | -1.332822000 | -1.838788000 | 1  | 3.355515000   | 3.280044000  | 0.979671000  |
| 1  | -0.207523000 | 0.922843000  | 3.096588000  | 1  | 3.296324000   | 4.159103000  | -0.545115000 |
| 1  | 5.439835000  | -0.170399000 | 0.827916000  | 1  | 1.945183000   | 5.317530000  | 1.211797000  |
| 1  | 4.320916000  | -0.916644000 | -0.315615000 | 1  | 0.927688000   | 4.768663000  | -0.115759000 |
| 1  | 5.234300000  | 2.011172000  | -0.407362000 | 1  | 1.318234000   | 3.313682000  | 2.536047000  |
| 1  | 5.805567000  | 0.726601000  | -1.481047000 | 1  | -0.121336000  | 4.210538000  | 2.066067000  |
| 1  | 4.116015000  | 1.248179000  | -1.550197000 | 1  | -0.512788000  | 2.656308000  | 0.185869000  |
| 1  | -2.194477000 | -1.819311000 | 0.145406000  | 1  | -0.438156000  | 1.781041000  | 1.722734000  |
| 1  | -1.205027000 | 1.405625000  | -1.383877000 | 1  | -1.7506149000 | -1.770493000 | -0.941730000 |
| 1  | 1.414640000  | -0.617344000 | -0.290388000 | 1  | -0.384752000  | -2.793687000 | -0.041555000 |
| 1  | -2.668435000 | -0.950588000 | 2.414769000  | 1  | -3.033667000  | -1.726565000 | 1.023936000  |
| 1  | -3.418694000 | 0.480963000  | 1.719125000  | 1  | -2.752129000  | -3.382136000 | 0.490028000  |
| 1  | -4.357060000 | -2.396149000 | 1.320713000  | 1  | -2.577474000  | -3.203590000 | 2.973930000  |
| 1  | -5.150188000 | -1.191723000 | 2.329935000  | 1  | -1.032112000  | -3.663669000 | 2.268596000  |
| 1  | -6.274498000 | -1.385277000 | 0.107733000  | 1  | -1.828273000  | -0.839549000 | 3.106439000  |
| 1  | -5.577187000 | 0.216227000  | 0.324845000  | 1  | -0.701604000  | -1.885286000 | 3.966573000  |
| 1  | -4.282695000 | -2.077157000 | -1.215595000 | 1  | 0.802580000   | -1.897269000 | 1.980359000  |
| 1  | -5.042624000 | -0.662860000 | -1.937995000 | 1  | 0.522585000   | -0.248922000 | 2.542785000  |
| 1  | -2.582025000 | -0.368704000 | -1.851322000 |    |               | 3_TS_PBu3_1  |              |
| 1  | -3.387994000 | 0.811688000  | -0.825674000 | 6  | 0.088614000   | -0.662152000 | -1.598956000 |
| 1  | -2.463667000 | 2.275405000  | 0.609510000  | 6  | 1.283359000   | -0.988887000 | -1.558709000 |
| 1  | -0.934193000 | 2.763592000  | 1.333496000  | 6  | 2.549355000   | -1.278005000 | -0.984676000 |
| 1  | -2.034982000 | 3.808434000  | -1.315699000 | 8  | 2.866216000   | -2.343431000 | -0.478197000 |
| 1  | -2.042837000 | 4.690490000  | 0.208452000  | 8  | 3.396651000   | -0.234498000 | -1.085123000 |
| 1  | -0.105330000 | 5.377817000  | -1.214735000 | 6  | 4.671850000   | -0.376222000 | -0.444655000 |
| 1  | 0.438081000  | 4.618118000  | 0.277595000  | 6  | 4.561939000   | -0.087390000 | 1.034968000  |
| 1  | 0.202366000  | 3.236367000  | -2.431195000 | 15 | -0.745053000  | -0.194834000 | 0.589663000  |
| 1  | 1.708612000  | 3.721367000  | -1.659957000 | 6  | 0.703204000   | 0.552246000  | 1.396903000  |
| 1  | 1.271842000  | 2.163502000  | 0.222847000  | 6  | -2.191942000  | 0.617177000  | 1.366546000  |
| 1  | 1.272151000  | 1.310637000  | -1.315093000 | 6  | -0.722699000  | -1.857364000 | 1.333274000  |
| 1  | 0.801743000  | -2.317026000 | 1.409622000  | 6  | 0.803181000   | 2.067498000  | 1.246472000  |
| 1  | -0.386293000 | -3.001004000 | 0.296755000  | 6  | 0.805542000   | 2.545104000  | -0.200067000 |
| 1  | 2.613921000  | -2.809801000 | -0.193822000 | 6  | 0.830587000   | 0.622109000  | -0.292018000 |
| 1  | 1.732524000  | -4.282126000 | 0.189543000  | 6  | -1.967798000  | -2.696259000 | 1.050632000  |
| 1  | 2.149654000  | -4.101797000 | -2.266238000 | 6  | -2.363606000  | -2.742778000 | -0.419552000 |
| 1  | 0.426190000  | -4.070431000 | -1.912607000 | 6  | -3.531943000  | -3.685487000 | -0.660495000 |
| 1  | 2.163345000  | -1.615797000 | -2.434178000 | 6  | -2.665713000  | 1.879914000  | 0.646002000  |
| 1  | 0.997064000  | -2.304550000 | -3.561092000 | 6  | -3.077396000  | 1.632122000  | -0.799417000 |

|    |              |              |              |    |              |              |              |
|----|--------------|--------------|--------------|----|--------------|--------------|--------------|
| 6  | -3.488083000 | 2.920323000  | -1.495353000 | 1  | 0.850708000  | 4.404615000  | -1.326546000 |
| 1  | -0.803055000 | -0.510137000 | -2.175496000 | 1  | -1.794007000 | -3.715120000 | 1.404105000  |
| 1  | 5.055779000  | -1.379028000 | -0.627741000 | 1  | -2.814237000 | -2.313870000 | 1.634502000  |
| 1  | 5.316741000  | 0.345979000  | -0.941322000 | 1  | -2.629287000 | -1.730356000 | -0.758972000 |
| 1  | 4.150991000  | 0.910865000  | 1.198306000  | 1  | -1.501211000 | -3.046009000 | -1.016960000 |
| 1  | 3.918131000  | -0.819213000 | 1.523689000  | 1  | -4.405866000 | -3.377240000 | -0.075497000 |
| 1  | 5.548430000  | -0.133311000 | 1.497494000  | 1  | -3.828702000 | -3.704688000 | -1.710887000 |
| 1  | 0.685862000  | 0.269766000  | 2.453880000  | 1  | -3.278004000 | -4.701538000 | -0.362799000 |
| 1  | 1.582541000  | 0.070696000  | 0.956350000  | 1  | -3.514993000 | 2.301723000  | 1.190717000  |
| 1  | -2.999678000 | -0.121981000 | 1.351457000  | 1  | -1.883242000 | 2.648333000  | 0.663020000  |
| 1  | -1.960287000 | 0.819683000  | 2.417805000  | 1  | -2.241127000 | 1.175556000  | -1.341666000 |
| 1  | 0.165442000  | -2.344741000 | 0.914566000  | 1  | -3.896324000 | 0.909281000  | -0.822537000 |
| 1  | -0.560107000 | -1.762654000 | 2.411355000  | 1  | -3.789697000 | 2.748739000  | -2.528303000 |
| 1  | -0.022427000 | 2.543672000  | 1.786492000  | 1  | -4.318505000 | 3.400693000  | -0.975302000 |
| 1  | 1.720360000  | 2.411622000  | 1.735291000  | 1  | -2.652012000 | 3.630948000  | -1.506731000 |
| 1  | 1.664697000  | 2.108982000  | -0.720334000 |    |              |              |              |
| 1  | -0.082730000 | 2.162783000  | -0.717734000 | 6  | -0.084268000 | 3_TS_Pbu3_3  | -1.601804000 |
| 1  | 1.709853000  | 4.470489000  | 0.211694000  | 6  | -1.289480000 | -0.368849000 | -1.555000000 |
| 1  | 0.846371000  | 4.405920000  | -1.326887000 | 6  | -2.550184000 | -0.921277000 | -0.959249000 |
| 1  | -0.053524000 | 4.489198000  | 0.190213000  | 8  | -2.890460000 | -1.997556000 | -0.491703000 |
| 1  | -1.790329000 | -3.716211000 | 1.404172000  | 8  | -3.363159000 | 0.153040000  | -0.990439000 |
| 1  | -2.811845000 | -2.315919000 | 1.634674000  | 6  | -4.626918000 | 0.019894000  | -0.324779000 |
| 1  | -2.627734000 | -1.732283000 | -0.758850000 | 6  | -4.472976000 | 0.235103000  | 1.163506000  |
| 1  | -1.498471000 | -3.046897000 | -1.016940000 | 15 | 0.738433000  | 0.038691000  | 0.600253000  |
| 1  | -3.273649000 | -4.704049000 | -0.362496000 | 6  | 0.370881000  | -1.552089000 | 1.409561000  |
| 1  | -4.402698000 | -3.380784000 | -0.075098000 | 6  | 2.262769000  | 0.625457000  | 1.430867000  |
| 1  | -3.825435000 | -3.707752000 | -1.710549000 | 6  | -0.582367000 | 1.072115000  | 1.306585000  |
| 1  | -3.516912000 | 2.299038000  | 1.191051000  | 6  | 1.482157000  | -2.592395000 | 1.272740000  |
| 1  | -1.885544000 | 2.647205000  | 0.663205000  | 6  | 1.786979000  | -2.998724000 | -0.166889000 |
| 1  | -2.242289000 | 1.174149000  | -1.341525000 | 6  | 0.658122000  | -3.797971000 | -0.802844000 |
| 1  | -3.897203000 | 0.906422000  | -0.822245000 | 6  | -0.464749000 | 2.568295000  | 1.025606000  |
| 1  | -3.792337000 | 2.746067000  | -2.527916000 | 6  | -0.328661000 | 2.913846000  | -0.451087000 |
| 1  | -4.321518000 | 3.397498000  | -0.974822000 | 6  | -0.324262000 | 4.416755000  | -0.681043000 |
| 1  | -2.655278000 | 3.629180000  | -1.506426000 | 6  | 3.535494000  | 0.321138000  | 0.640529000  |
|    |              | 3_TS_Pbu3_2  |              | 6  | 3.591387000  | 1.056749000  | -0.692206000 |
| 6  | 0.088126000  | -0.662758000 | -1.598768000 | 6  | 4.878727000  | 0.771197000  | -1.449603000 |
| 6  | 1.282732000  | -0.990018000 | -1.558525000 | 1  | 0.807278000  | -0.229043000 | -2.180016000 |
| 6  | 2.548639000  | -1.279496000 | -0.984477000 | 1  | -5.261501000 | 0.782654000  | -0.771489000 |
| 8  | 2.865051000  | -2.344847000 | -0.477557000 | 1  | -5.044824000 | -0.961738000 | -0.544108000 |
| 8  | 3.396408000  | -0.236426000 | -1.085455000 | 1  | -4.057868000 | 1.223576000  | 1.366874000  |
| 8  | 4.671555000  | -0.378387000 | -0.444942000 | 1  | -5.445409000 | 0.163459000  | 1.651823000  |
| 6  | 4.561795000  | -0.088689000 | 1.034523000  | 1  | -3.815166000 | -0.520412000 | 1.594960000  |
| 15 | -0.745364000 | -0.194710000 | 0.589739000  | 1  | 0.178377000  | -1.348947000 | 2.467978000  |
| 6  | 0.703427000  | 0.551076000  | 1.397208000  | 1  | -0.568273000 | -1.912426000 | 0.976276000  |
| 6  | -2.191616000 | 0.618625000  | 1.366418000  | 1  | 2.167707000  | 1.709486000  | 1.548505000  |
| 6  | -0.724629000 | -1.857265000 | 1.333354000  | 1  | 2.299705000  | 0.192702000  | 2.436210000  |
| 6  | 0.804799000  | 2.066237000  | 1.246805000  | 1  | -1.515346000 | 0.686458000  | 0.880791000  |
| 6  | 0.807899000  | 2.543842000  | -0.199731000 | 1  | -0.627778000 | 0.883843000  | 2.383800000  |
| 6  | 0.834373000  | 4.060823000  | -0.291679000 | 1  | 2.387831000  | -2.204441000 | 1.748409000  |
| 6  | -1.970477000 | -2.694997000 | 1.050559000  | 1  | 1.197461000  | -3.485194000 | 1.838001000  |
| 6  | -2.366142000 | -2.741109000 | -0.419675000 | 1  | 1.993139000  | -2.101993000 | -0.764911000 |
| 6  | -3.535320000 | -3.682728000 | -0.660797000 | 1  | 2.704494000  | -3.592430000 | -0.180939000 |
| 6  | -2.664132000 | 1.881775000  | 0.645775000  | 1  | 0.486310000  | -4.722119000 | -0.245453000 |
| 6  | -3.075896000 | 1.634277000  | -0.799671000 | 1  | -0.278660000 | -3.237506000 | -0.813124000 |
| 6  | -3.485412000 | 2.922792000  | -1.495715000 | 1  | 0.891420000  | -4.067140000 | -1.834091000 |
| 1  | -0.803485000 | -0.510487000 | -2.174434000 | 1  | -1.353718000 | 3.066035000  | 1.426188000  |
| 1  | 5.055023000  | -1.381469000 | -0.627484000 | 1  | 0.386935000  | 2.986313000  | 1.571652000  |
| 1  | 5.316768000  | 0.343248000  | -0.942014000 | 1  | 0.596175000  | 2.475041000  | -0.845928000 |
| 1  | 5.548287000  | -0.134646000 | 1.497043000  | 1  | -1.146920000 | 2.444318000  | -1.006732000 |
| 1  | 4.151152000  | 0.909786000  | 1.197302000  | 1  | 0.499583000  | 4.889443000  | -0.140938000 |
| 1  | 3.917779000  | -0.820033000 | 1.523685000  | 1  | -0.217469000 | 4.664432000  | -1.737703000 |
| 1  | 0.685632000  | 0.268605000  | 2.454178000  | 1  | -1.253817000 | 4.865576000  | -0.323547000 |
| 1  | 1.582409000  | 0.068722000  | 0.956826000  | 1  | 4.405919000  | 0.604661000  | 1.240032000  |
| 1  | -3.000032000 | -0.119787000 | 1.351254000  | 1  | 3.621983000  | -0.755193000 | 0.458320000  |
| 1  | -1.959899000 | 0.820945000  | 2.417698000  | 1  | 2.729023000  | 0.767222000  | -1.303965000 |
| 1  | 0.163100000  | -2.345464000 | 0.914731000  | 1  | 3.490496000  | 2.132023000  | -0.510017000 |
| 1  | -0.562060000 | -1.762715000 | 2.411453000  | 1  | 5.749538000  | 1.073159000  | -0.863392000 |
| 1  | -0.020490000 | 2.543157000  | 1.786656000  | 1  | 4.974796000  | -0.296924000 | -1.658117000 |
| 1  | 1.722187000  | 2.409528000  | 1.735820000  | 1  | 4.915122000  | 1.302361000  | -2.401352000 |
| 1  | 1.666756000  | 2.106915000  | -0.719814000 |    |              |              |              |
| 1  | -0.080621000 | 2.162350000  | -0.717582000 |    |              |              |              |
| 1  | -0.049450000 | 4.488736000  | 0.190350000  |    |              |              |              |
| 1  | 1.713906000  | 4.468389000  | 0.212227000  |    |              |              |              |

## 7 References

- (S1) (a) W. A. Henderson Jr. and C. A. Streuli, *J. Am. Chem. Soc.*, 1960, **82**, 5791–5794. (b) T. Allman and R. G. Goel, *Can. J. Chem.*, 1982, **60**, 716–722. (c) P. M. Zizelman, C. Amatore and J. K. Kochi, *J. Am. Chem. Soc.*, 1984, **106**, 3771–3784.
- (S2) S. Tshepelevitsh, A. Kütt, M. Lökov, I. Kaljurand, J. Saame, A. Heering, P. G. Plieger, R. Vianello and I. Leito, *Eur. J. Org. Chem.*, 2019, **2019**, 6735–6748.
- (S3) (a) J. G. Atton and L. A. P. Kane-Maguire, *J. Chem. Soc., Dalton Trans.*, 1982, 1491–1498. (b) L. A. P. Kane-Maguire, E. D. Honig and D. A. Sweigart, *Chem. Rev.*, 1984, **84**, 525–543.
- (S4) G. R. Fulmer, A. J. M. Miller, N. H. Sherden, H. E. Gottlieb, A. Nudelman, B. M. Stoltz, J. E. Bercaw and K. I. Goldberg, *Organometallics*, 2010, **29**, 2176–2179.
- (S5) R. W. Lang and H. J. Hansen, *Org. Synth.*, 1984, **6**, 202.
- (S6) F. An, H. Jangra, Y. Wei, M. Shi, H. Zipse and A. R. Ofial, *Chem. Commun.*, 2022, **58**, 3358–3361.
- (S7) P. Bhattacharya, J. A. Krause and H. Guan, *Organometallics*, 2014, **33**, 6113–6121.
- (S8) A <sup>31</sup>P NMR chemical shift of +25.5 ppm for **P2** with a phenyltetrazole counteranion was reported in: D. Virieux, A. F. Guillouzac and H.-J. Cristau, *Tetrahedron*, 2006, **62**, 3710–3720.
- (S9) J. R. Van Wazer, C. F. Callis, J. N. Shoolery and R. C. Jones, *J. Am. Chem. Soc.*, 1956, **78**, 5709–5962.
- (S10) Ł. Kapuśniak, P. N. Plessow, D. Tryzbiński, K. Woźniak, P. Hofmann and P. I. Jolly, *Organometallics*, 2021, **40**, 693–701.
- (S11) A. K. Sharma, H. Joshi, R. Bhaskar and A. K. Singh, *Dalton Trans.*, 2019, **48**, 10962–10970.
- (S12) The <sup>31</sup>P NMR chemical shift of PPh<sub>3</sub> in this work is consistent with data reported in: T. Li, A. J. Lough and R. H. Morris, *Chem. Eur. J.*, 2007, **13**, 3796–3803.
- (S13) E. Mercier, B. Fonovic, C. Henry, O. Kwon and T. Dudding, *Tetrahedron Lett.*, 2007, **48**, 3617–3620.
- (S14) Y. Liang, S. Liu, Y. Xia, Y. Li and Z.-X. Yu, *Chem. Eur. J.*, 2008, **14**, 4361–4373.
- (S15) (a) A. D. Becke, *J. Chem. Phys.*, 1993, **98**, 5648–5656. (b) P. J. Stephens, F. J. Devlin, C. F. Chabalowski and M. J. Frisch, *J. Phys. Chem.*, 1994, **98**, 11623–11627.
- (S16) (a) T. Clark, J. Chandrasekhar, G. W. Spitznagel and P. v. R. Schleyer, *J. Comput. Chem.*, 1983, **4**, 294–301. (b) M. J. Frisch, J. A. Pople and J. S. S. Binkley, *J. Chem. Phys.* 1984, **80**, 3265–3269. (c) R. Ditchfield, W. J. Hehre and J. A. Pople, *J. Chem. Phys.*, 1971, **54**, 724–728. (d) R. Krishnan, J. S. Binkley, R. Seeger and J. A. Pople, *J. Chem. Phys.*, 1980, **72**, 650–654.
- (S17) F. Weigend and R. Ahlrichs, *Phys. Chem. Chem. Phys.*, 2005, **7**, 3297–3305.
- (S18) (a) S. Grimme, J. Antony, S. Ehrlich and H. Krieg, *J. Chem. Phys.*, 2010, **132**, 154104. (b) S. Grimme, *J. Comput. Chem.*, 2006, **27**, 1787–1799.
- (S19) H. S. Yu, X. He, S. L. Li and D. G. Truhlar, *Chem. Sci.*, 2019, **7**, 5032–5051.
- (S20) J.-D. Chai and M. Head-Gordon, *Phys. Chem. Chem. Phys.*, 2008, **10**, 6615–6620.
- (S21) S. Grimme, *J. Chem. Phys.*, 2006, **124**, 034108.

- 
- (S22) (a) V. Barone and M. Cossi, *J. Phys. Chem. A*, 1998, **102**, 1995–2001. (b) M. Cossi, N. Rega, G. Scalmani and V. Barone, *J. Comput. Chem.*, 2003, **24**, 669–681.
- (S23) A. V. Marenich, C. J. Cramer and D. G. Truhlar, *J. Phys. Chem. B.*, 2009, **113**, 6378–6396.
- (S24) Gaussian 16, Revision B.01., M. J. Frisch, G. W. Trucks, H. B. Schlegel, G. E. Scuseria, M. A. Robb, J. R. Cheeseman, G. Scalmani, V. Barone, G. A. Petersson, H. Nakatsuji, X. Li, M. Caricato, A. V. Marenich, J. Bloino, B. G. Janesko, R. Gomperts, B. Mennucci, H. P. Hratchian, J. V. Ortiz, A. F. Izmaylov, J. L. Sonnenberg, D. Williams-Young, F. Ding, F. Lipparini, F. Egidi, J. Goings, B. Peng, A. Petrone, T. Henderson, D. Ranasinghe, V. G. Zakrzewski, J. Gao, N. Rega, G. Zheng, W. Liang, M. Hada, M. Ehara, K. Toyota, R. Fukuda, J. Hasegawa, M. Ishida, T. Nakajima, Y. Honda, O. Kitao, H. Nakai, T. Vreven, K. Throssell, J. A. Montgomery, Jr., J. E. Peralta, F. Ogliaro, M. J. Bearpark, J. J. Heyd, E. N. Brothers, K. N. Kudin, V. N. Staroverov, T. A. Keith, R. Kobayashi, J. Normand, K. Raghavachari, A. P. Rendell, J. C. Burant, S. S. Iyengar, J. Tomasi, M. Cossi, J. M. Millam, M. Klene, C. Adamo, R. Cammi, J. W. Ochterski, R. L. Martin, K. Morokuma, O. Farkas, J. B. Foresman, and D. J. Fox, Gaussian, Inc., Wallingford CT, 2016.
- (S25) S. Grimme, *J. Chem. Theory Comput.*, 2019, **15**, 2847–2862.
- (S26) C. Bannwarth, S. Ehlert and S. Grimme, *J. Chem. Theory Comput.*, 2019, **15**, 1652–1671.
- (S27) S. Grimme, *Chem. Eur. J.*, 2012, **18**, 9955–9964.
- (S28) P. Yi, J. Gomes, S. Mallikarjun Sharada, A. T. Bell and M. Head-Gordon, *Chem. Eur. J.*, 2012, **18**, 9955–9964.
- (S29) G. Luchini, J. V. Alegre-Requena, I. Funes-Ardoiz and R. S. Paton, *F1000Research*, 2020, **9** (Chem Inf Sci), 291.
- (S30) A. J. Foster and F. Weinhold, *J. Am. Chem. Soc.*, 1980, **102**, 7211–7218.
- (S31) A. E. Reed, L. A. Curtiss and F. Weinhold, *Chem. Rev.*, 1988, **88**, 899–926.
- (S32) C. Riplinger and F. Neese, *J. Chem. Phys.*, 2013, **138**, 034106.
- (S33) C. Riplinger, B. Sandhoefer, A. Hansen and F. Neese, *J. Chem. Phys.*, 2013, **139**, 134101.
- (S34) (a) F. Neese, *WIREs Comput. Mol. Sci.*, 2012, **2**, 73–78. (b) F. Neese, *WIREs Comput. Mol. Sci.*, 2018, **8**, e1327. (c) F. Neese, *WIREs Comput. Mol. Sci.*, 2022, **12**, e1606.
- (S35) C. Y. Legault, *CYLVIEW20*, Université de Sherbrooke, 2020 (<http://www.cylvview.org>).
- (S36) Values according to Active Thermochemical Tables (ATcT) Thermochemical Values ver.1.130: (a) Ruscic, R. E. Pinzon, M. L. Morton, G. von Laszewski, S. Bittner, S. G. Nijssure, K. A. Amin, M. Minkoff, and A. F. Wagner, *J. Phys. Chem. A*, 2004, **108**, 9979–9997 (b) B. Ruscic, R. E. Pinzon, G. von Laszewski, D. Kodeboyina, A. Burcat, D. Leahy, D. Montoya, and A. F. Wagner, *J. Phys. Conf. Ser.*, 2005, **16**, 561–570. (c) B. Ruscic and D. H. Bross, Argonne National Laboratory, Lemont, Illinois 2023; available at <https://atct.anl.gov/>.
